# Supplementary material for: The cation channel mechanisms of subthreshold inward depolarizing currents in the mice VTA dopaminergic neurons and their roles in the chronic-stress-induced depression-like behavior
Source: eLife journal article supplement (doi:10.7554/elife.88319), 2023-06-12
Supplement: fig1-data2 [file elife-88319-fig1-data2-v1.zip]

## Sheet: Sheet1
Th	Slc6a3	Drd2	Kcnj6	Slc17a6	Gad1
83.3333	77.451	54.902	71.5686	32.3529	10.7843
