# Supplementary material for: The cation channel mechanisms of subthreshold inward depolarizing currents in the mice VTA dopaminergic neurons and their roles in the chronic-stress-induced depression-like behavior
Source: eLife journal article supplement (doi:10.7554/elife.88319), 2023-06-12

VTA-mPFC

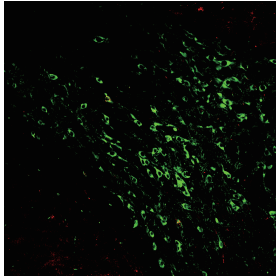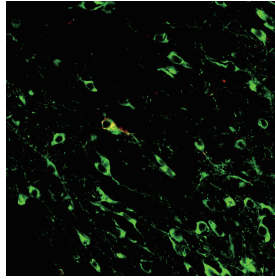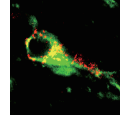

VTA-BLA

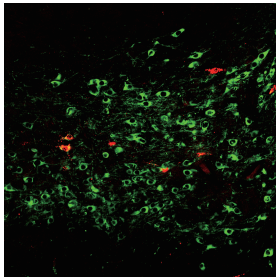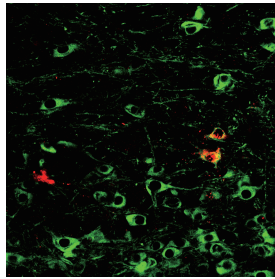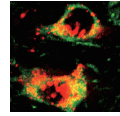

VTA-NAc ms

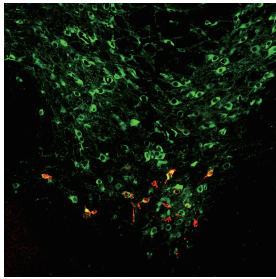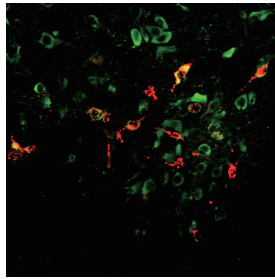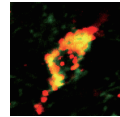

VTA-NAc c

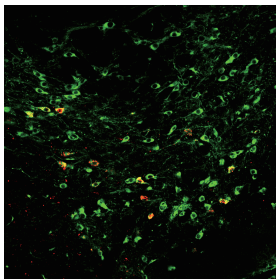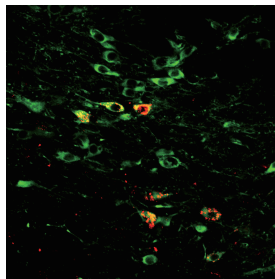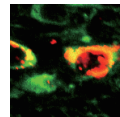

VTA-NAc ls

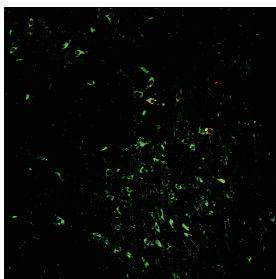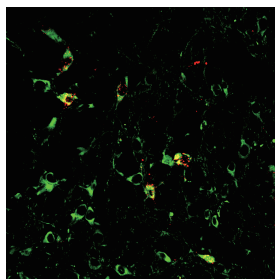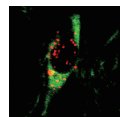

Supplement: fig2-figsupp2-data1 [file elife-88319-fig2-figsupp2-data1-v1.pdf]
