# Supplementary material for: The cation channel mechanisms of subthreshold inward depolarizing currents in the mice VTA dopaminergic neurons and their roles in the chronic-stress-induced depression-like behavior
Source: eLife journal article supplement (doi:10.7554/elife.88319), 2023-06-12

Figure 3 A

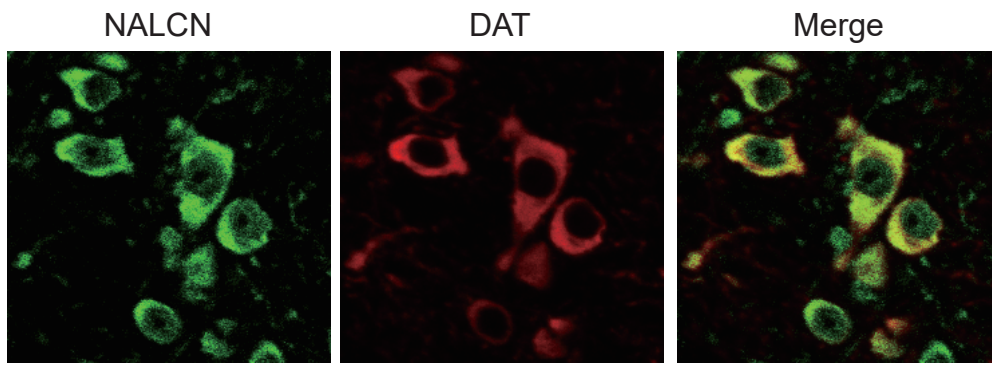

Figure 3 H

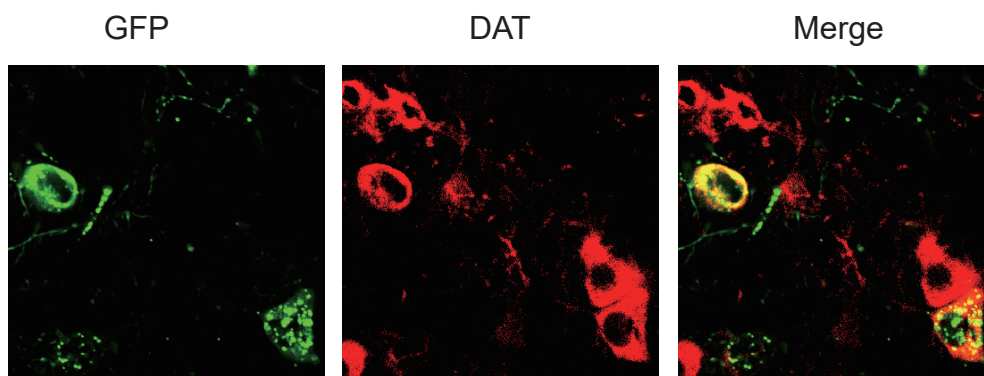

Supplement: fig3-data1 [file elife-88319-fig3-data1-v1.pdf]
