# Supplementary material for: The cation channel mechanisms of subthreshold inward depolarizing currents in the mice VTA dopaminergic neurons and their roles in the chronic-stress-induced depression-like behavior
Source: eLife journal article supplement (doi:10.7554/elife.88319), 2023-06-12
Supplement: fig4-data1 [file elife-88319-fig4-data1-v1.zip]

## Sheet: Sheet1
Trpc3	Trpc6	Trpv2
0	64.29	71.43
