# Supplementary material for: The cation channel mechanisms of subthreshold inward depolarizing currents in the mice VTA dopaminergic neurons and their roles in the chronic-stress-induced depression-like behavior
Source: eLife journal article supplement (doi:10.7554/elife.88319), 2023-06-12
Supplement: fig6-data3 [file elife-88319-fig6-data3-v1.zip]

## Sheet: Sheet1
			Con	CMUS
			0.807414	0.807414
			0.546026	0.546026
			0.515551	0.515551
			0.824413	0.595807
			0.88047	0.367146
			1.03778	0.020989
			1.25734	0.308791
			0.958899	0.191933
			0.868699	0.234219
			1.1724	0.159881
				0.162888
