# Supplementary material for: The cation channel mechanisms of subthreshold inward depolarizing currents in the mice VTA dopaminergic neurons and their roles in the chronic-stress-induced depression-like behavior
Source: eLife journal article supplement (doi:10.7554/elife.88319), 2023-06-12
Supplement: fig6-figsupp3-data1 [file elife-88319-fig6-figsupp3-data1-v1.zip]

## Sheet: Sheet1
CON	CMUS
0.983153	0.789913
1.05461	0.986232
0.962242	0.954534
1.07246	1.32707
0.981955	1.12511
0.945587	2.08487
1.07355	1.4402
0.742013	1.14777
1.18444	0.595259
	0.571863
	0.708418
	0.754028
