# Supplementary material for: The cation channel mechanisms of subthreshold inward depolarizing currents in the mice VTA dopaminergic neurons and their roles in the chronic-stress-induced depression-like behavior
Source: eLife journal article supplement (doi:10.7554/elife.88319), 2023-06-12
Supplement: fig6-figsupp4-data2 [file elife-88319-fig6-figsupp4-data2-v1.zip]

## Sheet: Sheet1
Con	CRS
0.81487	0.041319
0.990626	0.10638
1.1945	0.493236
1.17893	0.695356
0.816077	0.024382
1.00499	0.502918
0.962004	0.525508
1.3427	0.432605
1.00928	0.350433
0.686023	0.267131
	0.354069
	0.649861
	0.481107
	0.328809
