# Supplementary material for: The cation channel mechanisms of subthreshold inward depolarizing currents in the mice VTA dopaminergic neurons and their roles in the chronic-stress-induced depression-like behavior
Source: eLife journal article supplement (doi:10.7554/elife.88319), 2023-06-12

Figure 7 C

RFP

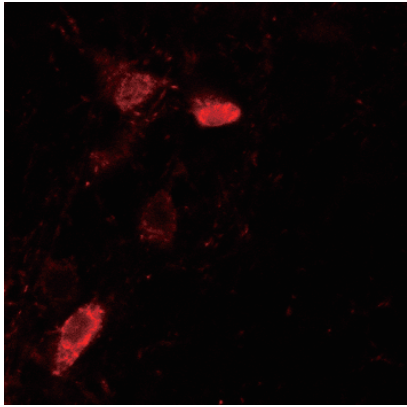

DAT

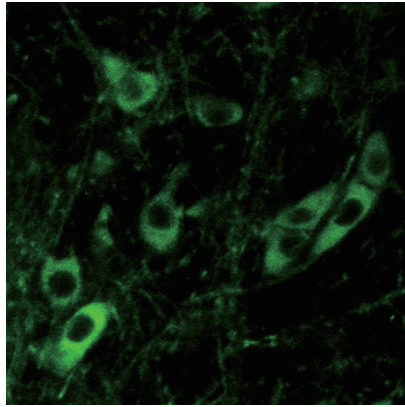

Merge

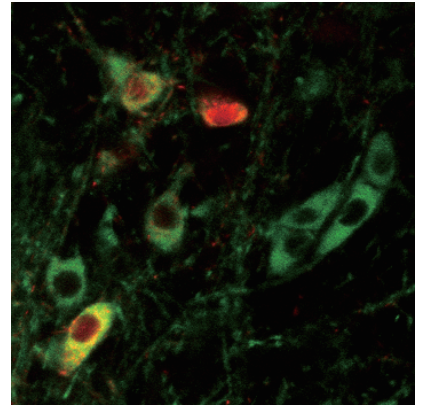

Figure 7 G

RFP

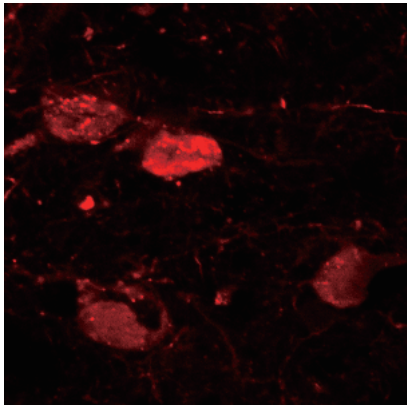

GFP

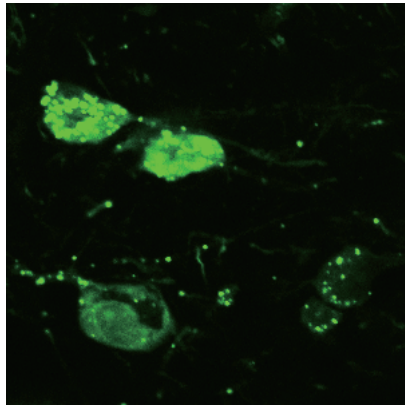

DAT

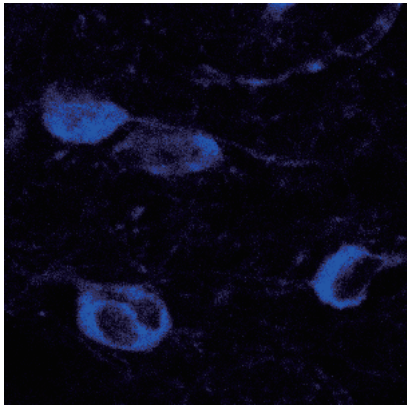

Merge

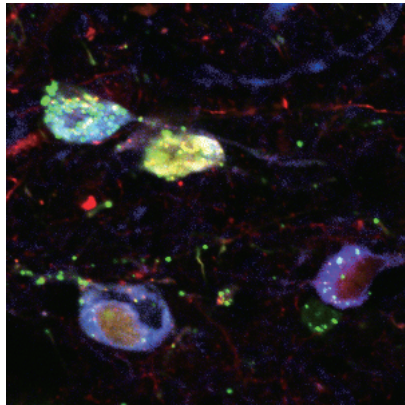

Supplement: fig7-data2 [file elife-88319-fig7-data2-v1.pdf]
