# Supplementary material for: The cation channel mechanisms of subthreshold inward depolarizing currents in the mice VTA dopaminergic neurons and their roles in the chronic-stress-induced depression-like behavior
Source: eLife journal article supplement (doi:10.7554/elife.88319), 2023-06-12
Supplement: fig7-data4 [file elife-88319-fig7-data4-v1.zip]

## Sheet: Sheet1
Con	C6-Ckd	C6-cKD+Coe
0.813186	0.397495	1.16568
1.00308	0.394901	0.732934
1.18373	0.388487	0.837447
0.975442	0.41517	0.733157
1.02456	0.39554	0.723447
0.94576	0.331649	1.3886
1.05424	0.681223	1.07465
	0.576292
	0.65713
	0.54713
