# Supplementary material for: The cation channel mechanisms of subthreshold inward depolarizing currents in the mice VTA dopaminergic neurons and their roles in the chronic-stress-induced depression-like behavior
Source: eLife. 2024 Dec 6;12:RP88319. doi: 10.7554/eLife.88319 (PMC11623934; doi:10.7554/eLife.88319)
Supplement: Figure 1—source data 4. [file elife-88319-fig1-data4.xlsx]

## Sheet: Figue 1 B i
	Time-course
	Time(min)	Firing rate (Hz)
	0.22	1.06061
	0.44	0.98485
	0.66	0.98485
	0.88	1.06061
	1.1	1.13636
	1.32	1.13636
	1.54	1.13636
	1.76	0.98485
	1.98	1.06061
	2.2	1.21212
	2.42	1.13636
	2.64	0.98485
	2.86	1.21212
	3.08	1.13636
	3.3	1.06061
	3.52	1.13636
	3.74	1.06061
	3.96	1.13636
	4.18	1.06061
	4.4	1.13636
	4.62	1.06061
	4.84	1.06061
	5.06	1.21212
	5.28	1.13636
	5.5	1.21212
	5.72	1.13636
	5.94	1.21212
	6.16	1.21212
	6.38	1.36364
	6.6	1.21212
	6.82	1.28788
	7.04	1.28788
	7.26	1.28788
	7.48	1.43939
	7.7	1.28788
	7.92	1.21212
	8.14	1.36364
	8.36	1.21212
	8.58	1.21212
	8.8	1.21212
	9.02	1.28788
	9.24	1.43939
	9.46	1.21212
	9.68	1.36364
	9.9	1.36364
	10.12	1.28788
	10.34	1.36364
	10.56	1.28788
	10.78	1.06061
	11	1.28788
	11.22	1.13636
	11.44	1.21212
	11.66	1.28788
	11.88	1.28788
	12.1	1.13636
	12.32	1.21212
	12.54	1.13636
	12.76	1.28788
	12.98	1.13636
	13.2	1.13636
	13.42	1.13636
	13.64	1.13636
	13.86	1.28788
	14.08	1.21212
	14.3	1.13636
	14.52	1.28788
	14.74	1.28788
	14.96	1.06061
	15.18	1.13636
	15.4	1.06061
	15.62	1.28788
	15.84	1.21212
	16.06	1.13636
	16.28	1.13636
	16.5	1.21212
	16.72	0.98485
	16.94	1.06061
	17.16	0.90909
	17.38	1.06061
	17.6	0.98485
	17.82	1.13636
	18.04	0.90909
	18.26	1.13636
	18.48	0.83333
	18.7	0.90909
	18.92	0.90909
	19.14	0.98485
	19.36	0.98485
	19.58	1.06061
	19.8	0.98485
	20.02	1.13636
	20.24	0.90909

## Sheet: Figure 1 B ii
ACSF			0Ca2+			ACSF
Time(ms)	Voltage (mV)		Time(ms)	Voltage (mV)		Time(ms)	Voltage (mV)
0	-0.03357		0	-0.04883		0	-0.07019
0.09375	-0.03357		0.0625	-0.04883		0.125	-0.03967
0.1875	-0.05798		0.1875	-0.04883		0.25	-0.02136
0.29688	-0.05188		0.25	-0.06409		0.375	-0.03357
0.39063	-0.05493		0.375	-0.03052		0.5	-0.02136
0.5	-0.04578		0.5	-0.01526		0.5	-0.03967
0.59375	-0.03357		0.5625	-0.01221		0.625	-0.04578
0.6875	-0.03967		0.6875	-0.0061		0.75	-0.04883
0.79688	-0.03967		0.75	-0.02441		0.875	-0.05493
0.89063	-0.06714		0.875	-0.03662		1	-0.05188
1	-0.07019		1	-0.03967		1	-0.02747
1.09375	-0.07629		1.0625	-0.03967		1.125	-0.04272
1.1875	-0.07324		1.1875	-0.03662		1.25	-0.05188
1.29688	-0.06104		1.25	-0.04272		1.375	-0.06714
1.39063	-0.06714		1.375	-0.04578		1.5	-0.07019
1.5	-0.07629		1.5	-0.03357		1.5	-0.06104
1.59375	-0.07629		1.5625	-0.03967		1.625	-0.06714
1.6875	-0.07629		1.6875	-0.02136		1.75	-0.04272
1.79688	-0.0824		1.75	-0.02441		1.875	-0.04883
1.89063	-0.09155		1.875	-0.03967		2	-0.04272
2	-0.08545		2	-0.04883		2	-0.04883
2.09375	-0.08545		2.0625	-0.07935		2.125	-0.05798
2.1875	-0.10071		2.1875	-0.07629		2.25	-0.06714
2.29688	-0.08545		2.25	-0.07935		2.375	-0.05493
2.39063	-0.05798		2.375	-0.06714		2.5	-0.04883
2.5	-0.04272		2.5	-0.05188		2.5	-0.06409
2.59375	-0.03967		2.5625	-0.05188		2.625	-0.06409
2.6875	-0.06409		2.6875	-0.05493		2.75	-0.0824
2.79688	-0.07324		2.75	-0.06409		2.875	-0.07324
2.89063	-0.0824		2.875	-0.05188		3	-0.07019
3	-0.06714		3	-0.04578		3	-0.07019
3.09375	-0.06714		3.0625	-0.06409		3.125	-0.04883
3.1875	-0.05798		3.1875	-0.07019		3.25	-0.04883
3.29688	-0.05493		3.25	-0.05493		3.375	-0.03052
3.39063	-0.05188		3.375	-0.07324		3.5	-0.03052
3.5	-0.06409		3.5	-0.06714		3.5	-0.02747
3.59375	-0.08545		3.5625	-0.07324		3.625	-0.02747
3.6875	-0.10071		3.6875	-0.06714		3.75	-0.02441
3.79688	-0.09766		3.75	-0.05493		3.875	-0.03052
3.89063	-0.07324		3.875	-0.06409		4	-0.03967
4	-0.07629		4	-0.05493		4	-0.04578
4.09375	-0.06104		4.0625	-0.06104		4.125	-0.06104
4.1875	-0.04578		4.1875	-0.05798		4.25	-0.05798
4.29688	-0.03052		4.25	-0.06409		4.375	-0.0824
4.39063	-0.02441		4.375	-0.0885		4.5	-0.07324
4.5	-0.04883		4.5	-0.0885		4.5	-0.09155
4.59375	-0.04272		4.5625	-0.0885		4.625	-0.06104
4.6875	-0.05188		4.6875	-0.07629		4.75	-0.07019
4.79688	-0.05188		4.75	-0.0824		4.875	-0.06104
4.89063	-0.06104		4.875	-0.07019		5	-0.06409
5	-0.07019		5	-0.04883		5	-0.05798
5.09375	-0.07324		5.0625	-0.06409		5.125	-0.04272
5.1875	-0.06714		5.1875	-0.06409		5.25	-0.06714
5.29688	-0.07935		5.25	-0.06714		5.375	-0.06714
5.39063	-0.07935		5.375	-0.06409		5.5	-0.07324
5.5	-0.07629		5.5	-0.05798		5.5	-0.06714
5.59375	-0.0946		5.5625	-0.04883		5.625	-0.07019
5.6875	-0.07629		5.6875	-0.04578		5.75	-0.06714
5.79688	-0.09155		5.75	-0.05188		5.875	-0.05493
5.89063	-0.0824		5.875	-0.05493		6	-0.05188
6	-0.08545		6	-0.04272		6	-0.03662
6.09375	-0.0946		6.0625	-0.02441		6.125	-0.05493
6.1875	-0.07935		6.1875	-0.03357		6.25	-0.05188
6.29688	-0.10986		6.25	-0.03662		6.375	-0.05493
6.39063	-0.12207		6.375	-0.04578		6.5	-0.03662
6.5	-0.11597		6.5	-0.01831		6.5	-0.02136
6.59375	-0.0824		6.5625	-0.03357		6.625	-0.00916
6.6875	-0.0824		6.6875	-0.03052		6.75	-0.01831
6.79688	-0.06104		6.75	-0.04272		6.875	-0.03967
6.89063	-0.07324		6.875	-0.01831		7	-0.03357
7	-0.05798		7	-0.01526		7	-0.03357
7.09375	-0.05188		7.0625	-0.01526		7.125	-0.02441
7.1875	-0.05493		7.1875	-0.03662		7.25	-0.03967
7.29688	-0.03967		7.25	-0.00916		7.375	-0.05493
7.39063	-0.06104		7.375	0.00916		7.5	-0.05798
7.5	-0.06104		7.5	0.0061		7.5	-0.04883
7.59375	-0.07324		7.5625	-0.00305		7.625	-0.03662
7.6875	-0.06104		7.6875	-0.01526		7.75	-0.05493
7.79688	-0.06104		7.75	-0.04578		7.875	-0.05188
7.89063	-0.05493		7.875	-0.04578		8	-0.05188
8	-0.06409		8	-0.05188		8	-0.05493
8.09375	-0.07629		8.0625	-0.05188		8.125	-0.05493
8.1875	-0.06714		8.1875	-0.03662		8.25	-0.07019
8.29688	-0.0824		8.25	-0.03662		8.375	-0.07629
8.39063	-0.06714		8.375	-0.04883		8.5	-0.0824
8.5	-0.0824		8.5	-0.03967		8.5	-0.09766
8.59375	-0.06714		8.5625	-0.04883		8.625	-0.0885
8.6875	-0.07324		8.6875	-0.03967		8.75	-0.0885
8.79688	-0.06409		8.75	-0.04883		8.875	-0.09155
8.89063	-0.06714		8.875	-0.05798		9	-0.07629
9	-0.09155		9	-0.07935		9	-0.09155
9.09375	-0.08545		9.0625	-0.07935		9.125	-0.09155
9.1875	-0.07629		9.1875	-0.09155		9.25	-0.0946
9.29688	-0.07629		9.25	-0.07629		9.375	-0.0885
9.39063	-0.07324		9.375	-0.07935		9.5	-0.09766
9.5	-0.06714		9.5	-0.0824		9.5	-0.10071
9.59375	-0.06714		9.5625	-0.07935		9.625	-0.11292
9.6875	-0.0824		9.6875	-0.08545		9.75	-0.12817
9.79688	-0.10071		9.75	-0.07324		9.875	-0.0885
9.89063	-0.10376		9.875	-0.0824		10	-0.0824
10	-0.0885		10	-0.07019		10	-0.07629
10.0938	-0.07019		10.0625	-0.07324		10.125	-0.07324
10.1875	-0.07324		10.1875	-0.07935		10.25	-0.08545
10.2969	-0.06104		10.25	-0.06714		10.375	-0.08545
10.3906	-0.05798		10.375	-0.07935		10.5	-0.07629
10.5	-0.06714		10.5	-0.07935		10.5	-0.0885
10.5938	-0.07324		10.5625	-0.0824		10.625	-0.09766
10.6875	-0.07935		10.6875	-0.0824		10.75	-0.0824
10.7969	-0.06714		10.75	-0.07629		10.875	-0.09766
10.8906	-0.07019		10.875	-0.06409		11	-0.08545
11	-0.05188		11	-0.0824		11	-0.0946
11.0938	-0.05188		11.0625	-0.07935		11.125	-0.07629
11.1875	-0.05798		11.1875	-0.0824		11.25	-0.04883
11.2969	-0.05188		11.25	-0.08545		11.375	-0.04272
11.3906	-0.06714		11.375	-0.0824		11.5	-0.04272
11.5	-0.05493		11.5	-0.0885		11.5	-0.06104
11.5938	-0.06714		11.5625	-0.09155		11.625	-0.04578
11.6875	-0.06409		11.6875	-0.0885		11.75	-0.03967
11.7969	-0.05188		11.75	-0.07019		11.875	-0.03967
11.8906	-0.03662		11.875	-0.06409		12	-0.05188
12	-0.03357		12	-0.04578		12	-0.06104
12.0938	-0.03967		12.0625	-0.04883		12.125	-0.06104
12.1875	-0.03662		12.1875	-0.05188		12.25	-0.03967
12.2969	-0.02747		12.25	-0.04883		12.375	-0.04883
12.3906	-0.04578		12.375	-0.06409		12.5	-0.06104
12.5	-0.06714		12.5	-0.06714		12.5	-0.05798
12.5938	-0.07629		12.5625	-0.05493		12.625	-0.06409
12.6875	-0.07019		12.6875	-0.07019		12.75	-0.06714
12.7969	-0.03662		12.75	-0.07324		12.875	-0.06714
12.8906	-0.01221		12.875	-0.05493		13	-0.06409
13	-0.01221		13	-0.05798		13	-0.07019
13.0938	-0.03052		13.0625	-0.05188		13.125	-0.07019
13.1875	-0.03662		13.1875	-0.07324		13.25	-0.07324
13.2969	-0.02747		13.25	-0.0824		13.375	-0.07629
13.3906	-0.06104		13.375	-0.06409		13.5	-0.05493
13.5	-0.06104		13.5	-0.07935		13.5	-0.06714
13.5938	-0.04883		13.5625	-0.07019		13.625	-0.06409
13.6875	-0.03662		13.6875	-0.07019		13.75	-0.07019
13.7969	-0.03357		13.75	-0.06714		13.875	-0.0824
13.8906	-0.05188		13.875	-0.0824		14	-0.07324
14	-0.06104		14	-0.07629		14	-0.05798
14.0938	-0.06409		14.0625	-0.07019		14.125	-0.04883
14.1875	-0.06104		14.1875	-0.06409		14.25	-0.03357
14.2969	-0.07019		14.25	-0.06409		14.375	-0.04272
14.3906	-0.07935		14.375	-0.07935		14.5	-0.04578
14.5	-0.0824		14.5	-0.07935		14.5	-0.06104
14.5938	-0.06409		14.5625	-0.07629		14.625	-0.07019
14.6875	-0.07019		14.6875	-0.07324		14.75	-0.06409
14.7969	-0.06714		14.75	-0.06714		14.875	-0.06714
14.8906	-0.04883		14.875	-0.08545		15	-0.06104
15	-0.05188		15	-0.07629		15	-0.06104
15.0938	-0.03662		15.0625	-0.10681		15.125	-0.04883
15.1875	-0.04578		15.1875	-0.10071		15.25	-0.05798
15.2969	-0.03357		15.25	-0.0885		15.375	-0.05493
15.3906	-0.03662		15.375	-0.08545		15.5	-0.06104
15.5	-0.02747		15.5	-0.06409		15.5	-0.05798
15.5938	-0.01831		15.5625	-0.05188		15.625	-0.06104
15.6875	-0.0061		15.6875	-0.05493		15.75	-0.06409
15.7969	-0.03052		15.75	-0.07324		15.875	-0.06714
15.8906	-0.04883		15.875	-0.06409		16	-0.0824
16	-0.06104		16	-0.07019		16	-0.08545
16.0938	-0.06104		16.0625	-0.05493		16.125	-0.0824
16.1875	-0.03967		16.1875	-0.07019		16.25	-0.07324
16.2969	-0.05188		16.25	-0.05798		16.375	-0.10071
16.3906	-0.02747		16.375	-0.06409		16.5	-0.10986
16.5	-0.02441		16.5	-0.06104		16.5	-0.10376
16.5938	-0.03357		16.5625	-0.06104		16.625	-0.10376
16.6875	-0.05798		16.6875	-0.03662		16.75	-0.0885
16.7969	-0.08545		16.75	-0.02747		16.875	-0.0824
16.8906	-0.07019		16.875	-0.03052		17	-0.06104
17	-0.0824		17	-0.02441		17	-0.07324
17.0938	-0.06409		17.0625	-0.03662		17.125	-0.07019
17.1875	-0.07935		17.1875	-0.02747		17.25	-0.07629
17.2969	-0.07019		17.25	-0.04578		17.375	-0.0885
17.3906	-0.09155		17.375	-0.08545		17.5	-0.07935
17.5	-0.06714		17.5	-0.0824		17.5	-0.08545
17.5938	-0.04272		17.5625	-0.0885		17.625	-0.07935
17.6875	-0.03662		17.6875	-0.07629		17.75	-0.07935
17.7969	-0.03662		17.75	-0.07324		17.875	-0.06409
17.8906	-0.05188		17.875	-0.05798		18	-0.06714
18	-0.04272		18	-0.07629		18	-0.06714
18.0938	-0.04883		18.0625	-0.0824		18.125	-0.05188
18.1875	-0.02136		18.1875	-0.09766		18.25	-0.04272
18.2969	-0.02747		18.25	-0.0824		18.375	-0.00916
18.3906	-0.02136		18.375	-0.0885		18.5	-0.03662
18.5	-0.02747		18.5	-0.0885		18.5	-0.03052
18.5938	-0.01221		18.5625	-0.0824		18.625	-0.03967
18.6875	-0.03052		18.6875	-0.06409		18.75	-0.06409
18.7969	-0.01831		18.75	-0.07019		18.875	-0.05798
18.8906	-0.02747		18.875	-0.07019		19	-0.06104
19	-0.04272		19	-0.07935		19	-0.05493
19.0938	-0.01526		19.0625	-0.07935		19.125	-0.05188
19.1875	-0.02747		19.1875	-0.06714		19.25	-0.05188
19.2969	-0.02747		19.25	-0.06409		19.375	-0.06714
19.3906	-0.05188		19.375	-0.05188		19.5	-0.06409
19.5	-0.07324		19.5	-0.06104		19.5	-0.04883
19.5938	-0.05798		19.5625	-0.05188		19.625	-0.03662
19.6875	-0.04272		19.6875	-0.06104		19.75	-0.04883
19.7969	-0.02441		19.75	-0.06409		19.875	-0.05798
19.8906	-0.04578		19.875	-0.05493		20	-0.07629
20	-0.04578		20	-0.07019		20	-0.07019
20.0938	-0.03967		20.0625	-0.05188		20.125	-0.04883
20.1875	-0.05493		20.1875	-0.04272		20.25	-0.04578
20.2969	-0.05493		20.25	-0.04272		20.375	-0.03052
20.3906	-0.07019		20.375	-0.03967		20.5	-0.04578
20.5	-0.05798		20.5	-0.02441		20.5	-0.05493
20.5938	-0.06714		20.5625	-0.01831		20.625	-0.03967
20.6875	-0.06714		20.6875	-0.03357		20.75	-0.03052
20.7969	-0.07019		20.75	-0.03967		20.875	-0.02136
20.8906	-0.06409		20.875	-0.07629		21	-0.03357
21	-0.0824		21	-0.0824		21	-0.03662
21.0938	-0.0946		21.0625	-0.06104		21.125	-0.06409
21.1875	-0.0885		21.1875	-0.06104		21.25	-0.07019
21.2969	-0.06714		21.25	-0.04883		21.375	-0.05798
21.3906	-0.06714		21.375	-0.05188		21.5	-0.07324
21.5	-0.06714		21.5	-0.06714		21.5	-0.07629
21.5938	-0.06409		21.5625	-0.06409		21.625	-0.05798
21.6875	-0.07324		21.6875	-0.07324		21.75	-0.07019
21.7969	-0.06409		21.75	-0.07935		21.875	-0.0885
21.8906	-0.07935		21.875	-0.05798		22	-0.09155
22	-0.07629		22	-0.05188		22	-0.0946
22.0938	-0.09155		22.0625	-0.04272		22.125	-0.07935
22.1875	-0.09155		22.1875	-0.04578		22.25	-0.07629
22.2969	-0.07935		22.25	-0.05493		22.375	-0.0824
22.3906	-0.07629		22.375	-0.07019		22.5	-0.08545
22.5	-0.04883		22.5	-0.06714		22.5	-0.08545
22.5938	-0.07324		22.5625	-0.06714		22.625	-0.07629
22.6875	-0.07935		22.6875	-0.07324		22.75	-0.07019
22.7969	-0.0885		22.75	-0.08545		22.875	-0.07324
22.8906	-0.09766		22.875	-0.07629		23	-0.07019
23	-0.08545		23	-0.05798		23	-0.04578
23.0938	-0.06714		23.0625	-0.06409		23.125	-0.05798
23.1875	-0.06409		23.1875	-0.05798		23.25	-0.04272
23.2969	-0.06714		23.25	-0.07324		23.375	-0.05188
23.3906	-0.0946		23.375	-0.06714		23.5	-0.04578
23.5	-0.09766		23.5	-0.05798		23.5	-0.05188
23.5938	-0.07324		23.5625	-0.05798		23.625	-0.04272
23.6875	-0.0885		23.6875	-0.05188		23.75	-0.04578
23.7969	-0.06104		23.75	-0.06409		23.875	-0.05188
23.8906	-0.06104		23.875	-0.05798		24	-0.03662
24	-0.05798		24	-0.05493		24	-0.03967
24.0938	-0.05493		24.0625	-0.05798		24.125	-0.03662
24.1875	-0.06714		24.1875	-0.07019		24.25	-0.04883
24.2969	-0.06409		24.25	-0.07019		24.375	-0.04272
24.3906	-0.06409		24.375	-0.06714		24.5	-0.04578
24.5	-0.07019		24.5	-0.07629		24.5	-0.04272
24.5938	-0.07935		24.5625	-0.07629		24.625	-0.06409
24.6875	-0.08545		24.6875	-0.05798		24.75	-0.0885
24.7969	-0.08545		24.75	-0.04272		24.875	-0.09155
24.8906	-0.07324		24.875	-0.04578		25	-0.08545
25	-0.0946		25	-0.04883		25	-0.07629
25.0938	-0.10376		25.0625	-0.04883		25.125	-0.07935
25.1875	-0.09766		25.1875	-0.05188		25.25	-0.07019
25.2969	-0.08545		25.25	-0.04883		25.375	-0.05798
25.3906	-0.07629		25.375	-0.06104		25.5	-0.05798
25.5	-0.07629		25.5	-0.03662		25.5	-0.05188
25.5938	-0.07324		25.5625	-0.05493		25.625	-0.04578
25.6875	-0.07019		25.6875	-0.05188		25.75	-0.04272
25.7969	-0.07629		25.75	-0.05493		25.875	-0.05188
25.8906	-0.06104		25.875	-0.05798		26	-0.02747
26	-0.06714		26	-0.04883		26	-0.04272
26.0938	-0.07935		26.0625	-0.05188		26.125	-0.03967
26.1875	-0.0885		26.1875	-0.05493		26.25	-0.05493
26.2969	-0.07935		26.25	-0.04578		26.375	-0.03662
26.3906	-0.06409		26.375	-0.03967		26.5	-0.03662
26.5	-0.06714		26.5	-0.04272		26.5	-0.03357
26.5938	-0.07019		26.5625	-0.04883		26.625	-0.03357
26.6875	-0.05493		26.6875	-0.04272		26.75	-0.05493
26.7969	-0.05798		26.75	-0.05493		26.875	-0.04578
26.8906	-0.06104		26.875	-0.04578		27	-0.03052
27	-0.07019		27	-0.05493		27	-0.01221
27.0938	-0.06409		27.0625	-0.03662		27.125	0
27.1875	-0.04578		27.1875	-0.04883		27.25	-0.01221
27.2969	-0.05188		27.25	-0.03662		27.375	-0.0061
27.3906	-0.05188		27.375	-0.03662		27.5	-0.02441
27.5	-0.07019		27.5	-0.02441		27.5	-0.03357
27.5938	-0.05798		27.5625	-0.04578		27.625	-0.03662
27.6875	-0.05493		27.6875	-0.04883		27.75	-0.02747
27.7969	-0.06104		27.75	-0.06409		27.875	-0.03357
27.8906	-0.07324		27.875	-0.05798		28	-0.04578
28	-0.07935		28	-0.04272		28	-0.04883
28.0938	-0.07629		28.0625	-0.03052		28.125	-0.06714
28.1875	-0.08545		28.1875	-0.01831		28.25	-0.07935
28.2969	-0.07324		28.25	-0.0061		28.375	-0.07019
28.3906	-0.08545		28.375	-0.01831		28.5	-0.07629
28.5	-0.05798		28.5	-0.03052		28.5	-0.0946
28.5938	-0.07324		28.5625	-0.04272		28.625	-0.0946
28.6875	-0.0885		28.6875	-0.05188		28.75	-0.0946
28.7969	-0.07629		28.75	-0.05493		28.875	-0.0885
28.8906	-0.0885		28.875	-0.04578		29	-0.0946
29	-0.10376		29	-0.03967		29	-0.07935
29.0938	-0.10071		29.0625	-0.04883		29.125	-0.07935
29.1875	-0.11597		29.1875	-0.04272		29.25	-0.07019
29.2969	-0.10986		29.25	-0.03967		29.375	-0.07324
29.3906	-0.0885		29.375	-0.04883		29.5	-0.08545
29.5	-0.0946		29.5	-0.05493		29.5	-0.0824
29.5938	-0.10071		29.5625	-0.07324		29.625	-0.09766
29.6875	-0.10986		29.6875	-0.06714		29.75	-0.0885
29.7969	-0.11292		29.75	-0.0885		29.875	-0.08545
29.8906	-0.10071		29.875	-0.08545		30	-0.0885
30	-0.08545		30	-0.0885		30	-0.10071
30.0938	-0.07935		30.0625	-0.09155		30.125	-0.11292
30.1875	-0.08545		30.1875	-0.0946		30.25	-0.10376
30.2969	-0.07935		30.25	-0.12207		30.375	-0.10681
30.3906	-0.06714		30.375	-0.11902		30.5	-0.0946
30.5	-0.04883		30.5	-0.10681		30.5	-0.09766
30.5938	-0.05798		30.5625	-0.11902		30.625	-0.0824
30.6875	-0.03967		30.6875	-0.0946		30.75	-0.0824
30.7969	-0.03052		30.75	-0.07935		30.875	-0.07019
30.8906	-0.03357		30.875	-0.07324		31	-0.07324
31	-0.03662		31	-0.07935		31	-0.06714
31.0938	-0.05493		31.0625	-0.0946		31.125	-0.07324
31.1875	-0.04578		31.1875	-0.09766		31.25	-0.07019
31.2969	-0.05493		31.25	-0.0946		31.375	-0.06714
31.3906	-0.04883		31.375	-0.09155		31.5	-0.07629
31.5	-0.05188		31.5	-0.07324		31.5	-0.05188
31.5938	-0.04578		31.5625	-0.06409		31.625	-0.05493
31.6875	-0.04883		31.6875	-0.04578		31.75	-0.04883
31.7969	-0.04883		31.75	-0.04578		31.875	-0.04883
31.8906	-0.03052		31.875	-0.06104		32	-0.05188
32	-0.05493		32	-0.06409		32	-0.05188
32.0938	-0.04883		32.0625	-0.05188		32.125	-0.04883
32.1875	-0.06409		32.1875	-0.03052		32.25	-0.06104
32.2969	-0.05798		32.25	-0.04272		32.375	-0.06104
32.3906	-0.07019		32.375	-0.03357		32.5	-0.05798
32.5	-0.0885		32.5	-0.03662		32.5	-0.06714
32.5938	-0.09155		32.5625	-0.04883		32.625	-0.05493
32.6875	-0.07935		32.6875	-0.03967		32.75	-0.06409
32.7969	-0.07324		32.75	-0.05493		32.875	-0.05493
32.8906	-0.06104		32.875	-0.06409		33	-0.05798
33	-0.04883		33	-0.05188		33	-0.05493
33.0938	-0.05188		33.0625	-0.03357		33.125	-0.03662
33.1875	-0.04883		33.1875	-0.03357		33.25	-0.06409
33.2969	-0.07629		33.25	-0.04578		33.375	-0.07324
33.3906	-0.07629		33.375	-0.04883		33.5	-0.09766
33.5	-0.06714		33.5	-0.04272		33.5	-0.07019
33.5938	-0.06714		33.5625	-0.05188		33.625	-0.06409
33.6875	-0.05188		33.6875	-0.05188		33.75	-0.07019
33.7969	-0.05493		33.75	-0.05798		33.875	-0.06409
33.8906	-0.04883		33.875	-0.07629		34	-0.07324
34	-0.04883		34	-0.06104		34	-0.06409
34.0938	-0.04272		34.0625	-0.07935		34.125	-0.07629
34.1875	-0.06104		34.1875	-0.07629		34.25	-0.06104
34.2969	-0.06409		34.25	-0.07019		34.375	-0.03662
34.3906	-0.05188		34.375	-0.06714		34.5	-0.03662
34.5	-0.04272		34.5	-0.07629		34.5	-0.03967
34.5938	-0.04883		34.5625	-0.07019		34.625	-0.02441
34.6875	-0.04883		34.6875	-0.07935		34.75	-0.04883
34.7969	-0.04578		34.75	-0.0946		34.875	-0.05188
34.8906	-0.05493		34.875	-0.07629		35	-0.05188
35	-0.05188		35	-0.07935		35	-0.05798
35.0938	-0.06104		35.0625	-0.06714		35.125	-0.07019
35.1875	-0.05493		35.1875	-0.06714		35.25	-0.07324
35.2969	-0.03662		35.25	-0.06714		35.375	-0.07324
35.3906	-0.03662		35.375	-0.06104		35.5	-0.0885
35.5	-0.03967		35.5	-0.07324		35.5	-0.07324
35.5938	-0.03967		35.5625	-0.06714		35.625	-0.07629
35.6875	-0.03967		35.6875	-0.06714		35.75	-0.06104
35.7969	-0.03052		35.75	-0.07019		35.875	-0.0824
35.8906	-0.02747		35.875	-0.10071		36	-0.0824
36	-0.03357		36	-0.07629		36	-0.08545
36.0938	-0.03662		36.0625	-0.07629		36.125	-0.10681
36.1875	-0.04272		36.1875	-0.07629		36.25	-0.0824
36.2969	-0.02747		36.25	-0.07019		36.375	-0.09155
36.3906	-0.03662		36.375	-0.0885		36.5	-0.10376
36.5	-0.03357		36.5	-0.07324		36.5	-0.10376
36.5938	-0.03357		36.5625	-0.07629		36.625	-0.0885
36.6875	-0.02136		36.6875	-0.05798		36.75	-0.07019
36.7969	-0.02136		36.75	-0.07629		36.875	-0.05493
36.8906	-0.04272		36.875	-0.06714		37	-0.07019
37	-0.04578		37	-0.08545		37	-0.07935
37.0938	-0.04272		37.0625	-0.07019		37.125	-0.07019
37.1875	-0.04883		37.1875	-0.07629		37.25	-0.08545
37.2969	-0.06409		37.25	-0.07935		37.375	-0.09766
37.3906	-0.06104		37.375	-0.09766		37.5	-0.10071
37.5	-0.05188		37.5	-0.11597		37.5	-0.0824
37.5938	-0.05493		37.5625	-0.09155		37.625	-0.06714
37.6875	-0.06104		37.6875	-0.07324		37.75	-0.06409
37.7969	-0.06714		37.75	-0.06409		37.875	-0.07324
37.8906	-0.04578		37.875	-0.06104		38	-0.05798
38	-0.04578		38	-0.0885		38	-0.06104
38.0938	-0.02747		38.0625	-0.07935		38.125	-0.07629
38.1875	-0.03967		38.1875	-0.07935		38.25	-0.06104
38.2969	-0.04272		38.25	-0.06714		38.375	-0.0824
38.3906	-0.03967		38.375	-0.06714		38.5	-0.07935
38.5	-0.02441		38.5	-0.05798		38.5	-0.07324
38.5938	-0.02747		38.5625	-0.04272		38.625	-0.04883
38.6875	-0.04883		38.6875	-0.04272		38.75	-0.03967
38.7969	-0.05188		38.75	-0.05188		38.875	-0.04578
38.8906	-0.05798		38.875	-0.05798		39	-0.05188
39	-0.03357		39	-0.06714		39	-0.05188
39.0938	-0.02441		39.0625	-0.07019		39.125	-0.04883
39.1875	-0.03662		39.1875	-0.07324		39.25	-0.04272
39.2969	-0.06104		39.25	-0.06714		39.375	-0.04272
39.3906	-0.06409		39.375	-0.07629		39.5	-0.04883
39.5	-0.05798		39.5	-0.06104		39.5	-0.03052
39.5938	-0.07629		39.5625	-0.05798		39.625	-0.03357
39.6875	-0.05188		39.6875	-0.07019		39.75	-0.03357
39.7969	-0.04578		39.75	-0.06409		39.875	-0.04578
39.8906	-0.02441		39.875	-0.07324		40	-0.07019
40	-0.03967		40	-0.07019		40	-0.04578
40.0938	-0.04578		40.0625	-0.06409		40.125	-0.03357
40.1875	-0.05188		40.1875	-0.04883		40.25	-0.02747
40.2969	-0.04883		40.25	-0.06104		40.375	-0.01831
40.3906	-0.04272		40.375	-0.05798		40.5	-0.02747
40.5	-0.06714		40.5	-0.03967		40.5	-0.04272
40.5938	-0.06409		40.5625	-0.04272		40.625	-0.05493
40.6875	-0.07019		40.6875	-0.03967		40.75	-0.06714
40.7969	-0.06714		40.75	-0.06104		40.875	-0.07019
40.8906	-0.06714		40.875	-0.05493		41	-0.05188
41	-0.08545		41	-0.06104		41	-0.07019
41.0938	-0.09155		41.0625	-0.05493		41.125	-0.04883
41.1875	-0.10071		41.1875	-0.03662		41.25	-0.04578
41.2969	-0.0885		41.25	-0.02441		41.375	-0.04272
41.3906	-0.07935		41.375	-0.04272		41.5	-0.04272
41.5	-0.06714		41.5	-0.06104		41.5	-0.04578
41.5938	-0.07324		41.5625	-0.05798		41.625	-0.05188
41.6875	-0.0824		41.6875	-0.06409		41.75	-0.06104
41.7969	-0.0824		41.75	-0.06104		41.875	-0.06714
41.8906	-0.0824		41.875	-0.04578		42	-0.06409
42	-0.06714		42	-0.01831		42	-0.05798
42.0938	-0.05798		42.0625	-0.02441		42.125	-0.07324
42.1875	-0.08545		42.1875	-0.00916		42.25	-0.06714
42.2969	-0.0885		42.25	-0.02441		42.375	-0.06409
42.3906	-0.06409		42.375	-0.05493		42.5	-0.06104
42.5	-0.05188		42.5	-0.06409		42.5	-0.04883
42.5938	-0.04272		42.5625	-0.07324		42.625	-0.05493
42.6875	-0.06104		42.6875	-0.05493		42.75	-0.06104
42.7969	-0.08545		42.75	-0.06714		42.875	-0.07019
42.8906	-0.07935		42.875	-0.06714		43	-0.05798
43	-0.07935		43	-0.07629		43	-0.06714
43.0938	-0.05493		43.0625	-0.06409		43.125	-0.06409
43.1875	-0.05798		43.1875	-0.05188		43.25	-0.05493
43.2969	-0.06714		43.25	-0.06714		43.375	-0.05798
43.3906	-0.06714		43.375	-0.06409		43.5	-0.05798
43.5	-0.08545		43.5	-0.07324		43.5	-0.06409
43.5938	-0.07019		43.5625	-0.06409		43.625	-0.03662
43.6875	-0.07324		43.6875	-0.06409		43.75	-0.06104
43.7969	-0.08545		43.75	-0.07019		43.875	-0.03357
43.8906	-0.06104		43.875	-0.06714		44	-0.04272
44	-0.06104		44	-0.06409		44	-0.04883
44.0938	-0.05493		44.0625	-0.08545		44.125	-0.04578
44.1875	-0.04272		44.1875	-0.07629		44.25	-0.04272
44.2969	-0.04272		44.25	-0.07324		44.375	-0.05188
44.3906	-0.04272		44.375	-0.09766		44.5	-0.06714
44.5	-0.05798		44.5	-0.10071		44.5	-0.06104
44.5938	-0.07019		44.5625	-0.11292		44.625	-0.07324
44.6875	-0.06409		44.6875	-0.0885		44.75	-0.06714
44.7969	-0.07019		44.75	-0.0824		44.875	-0.07019
44.8906	-0.07935		44.875	-0.05493		45	-0.05188
45	-0.09155		45	-0.05188		45	-0.03967
45.0938	-0.06714		45.0625	-0.05798		45.125	-0.03662
45.1875	-0.05493		45.1875	-0.05493		45.25	-0.04883
45.2969	-0.05493		45.25	-0.07935		45.375	-0.05493
45.3906	-0.06714		45.375	-0.07629		45.5	-0.05188
45.5	-0.06104		45.5	-0.07324		45.5	-0.04883
45.5938	-0.07629		45.5625	-0.04883		45.625	-0.05493
45.6875	-0.08545		45.6875	-0.04578		45.75	-0.03662
45.7969	-0.09155		45.75	-0.03967		45.875	-0.03052
45.8906	-0.0824		45.875	-0.04272		46	-0.03052
46	-0.0946		46	-0.03357		46	-0.05188
46.0938	-0.09766		46.0625	-0.02747		46.125	-0.05798
46.1875	-0.0885		46.1875	-0.05188		46.25	-0.06714
46.2969	-0.10376		46.25	-0.03357		46.375	-0.0824
46.3906	-0.07324		46.375	-0.04272		46.5	-0.06409
46.5	-0.07019		46.5	-0.02441		46.5	-0.03662
46.5938	-0.0885		46.5625	-0.03052		46.625	-0.05798
46.6875	-0.09155		46.6875	-0.02747		46.75	-0.05493
46.7969	-0.0824		46.75	-0.02136		46.875	-0.07935
46.8906	-0.04883		46.875	-0.02747		47	-0.05798
47	-0.07019		47	-0.02747		47	-0.03967
47.0938	-0.05188		47.0625	-0.03967		47.125	-0.04578
47.1875	-0.07019		47.1875	-0.06409		47.25	-0.03967
47.2969	-0.07019		47.25	-0.05188		47.375	-0.04883
47.3906	-0.07935		47.375	-0.03357		47.5	-0.04578
47.5	-0.06409		47.5	0.01526		47.5	-0.05188
47.5938	-0.03967		47.5625	-0.00305		47.625	-0.04578
47.6875	-0.04272		47.6875	-0.01831		47.75	-0.06409
47.7969	-0.05188		47.75	-0.02441		47.875	-0.07019
47.8906	-0.05493		47.875	-0.06104		48	-0.04578
48	-0.05798		48	-0.06409		48	-0.05493
48.0938	-0.04578		48.0625	-0.04578		48.125	-0.05188
48.1875	-0.04578		48.1875	-0.04883		48.25	-0.06409
48.2969	-0.05493		48.25	-0.03357		48.375	-0.07935
48.3906	-0.04578		48.375	-0.03967		48.5	-0.07324
48.5	-0.07019		48.5	-0.02441		48.5	-0.07629
48.5938	-0.0824		48.5625	-0.04272		48.625	-0.0824
48.6875	-0.06409		48.6875	-0.04883		48.75	-0.07019
48.7969	-0.05798		48.75	-0.03357		48.875	-0.07629
48.8906	-0.07019		48.875	-0.04578		49	-0.07019
49	-0.10071		49	-0.03052		49	-0.08545
49.0938	-0.07935		49.0625	-0.03662		49.125	-0.0885
49.1875	-0.10986		49.1875	-0.04578		49.25	-0.07935
49.2969	-0.10071		49.25	-0.06409		49.375	-0.09155
49.3906	-0.0885		49.375	-0.08545		49.5	-0.0885
49.5	-0.0824		49.5	-0.0885		49.5	-0.08545
49.5938	-0.09155		49.5625	-0.10071		49.625	-0.0885
49.6875	-0.09766		49.6875	-0.10986		49.75	-0.0885
49.7969	-0.10376		49.75	-0.10376		49.875	-0.07324
49.8906	-0.10071		49.875	-0.0946		50	-0.05493
50	-0.07935		50	-0.11292		50	-0.06714
50.0938	-0.07019		50.0625	-0.10376		50.125	-0.0946
50.1875	-0.07629		50.1875	-0.10681		50.25	-0.10681
50.2969	-0.06714		50.25	-0.07935		50.375	-0.09766
50.3906	-0.0824		50.375	-0.08545		50.5	-0.10986
50.5	-0.06104		50.5	-0.09155		50.5	-0.0824
50.5938	-0.04883		50.5625	-0.10376		50.625	-0.07019
50.6875	-0.03052		50.6875	-0.11292		50.75	-0.05493
50.7969	-0.02747		50.75	-0.07935		50.875	-0.04883
50.8906	-0.02136		50.875	-0.07629		51	-0.06104
51	-0.02747		51	-0.07324		51	-0.07629
51.0938	-0.02136		51.0625	-0.07935		51.125	-0.07019
51.1875	-0.03662		51.1875	-0.0885		51.25	-0.07019
51.2969	-0.04883		51.25	-0.10071		51.375	-0.07935
51.3906	-0.05798		51.375	-0.0885		51.5	-0.05798
51.5	-0.04883		51.5	-0.09155		51.5	-0.06104
51.5938	-0.04883		51.5625	-0.07324		51.625	-0.04578
51.6875	-0.06104		51.6875	-0.07324		51.75	-0.04578
51.7969	-0.06714		51.75	-0.0946		51.875	-0.04883
51.8906	-0.06104		51.875	-0.0885		52	-0.03967
52	-0.05493		52	-0.10071		52	-0.04578
52.0938	-0.06409		52.0625	-0.08545		52.125	-0.05188
52.1875	-0.06714		52.1875	-0.06714		52.25	-0.06104
52.2969	-0.06714		52.25	-0.07019		52.375	-0.05798
52.3906	-0.06714		52.375	-0.05493		52.5	-0.06714
52.5	-0.06409		52.5	-0.03357		52.5	-0.06104
52.5938	-0.06714		52.5625	-0.05493		52.625	-0.06409
52.6875	-0.04578		52.6875	-0.06409		52.75	-0.05493
52.7969	-0.03052		52.75	-0.04883		52.875	-0.03662
52.8906	-0.03662		52.875	-0.06714		53	-0.04883
53	-0.06409		53	-0.04578		53	-0.05188
53.0938	-0.06104		53.0625	-0.05188		53.125	-0.06714
53.1875	-0.04883		53.1875	-0.04578		53.25	-0.07019
53.2969	-0.04578		53.25	-0.03967		53.375	-0.06409
53.3906	-0.05798		53.375	-0.03967		53.5	-0.06714
53.5	-0.05798		53.5	-0.04883		53.5	-0.06409
53.5938	-0.06409		53.5625	-0.04578		53.625	-0.07019
53.6875	-0.0824		53.6875	-0.04883		53.75	-0.07935
53.7969	-0.07324		53.75	-0.05493		53.875	-0.07629
53.8906	-0.05493		53.875	-0.04272		54	-0.06714
54	-0.05188		54	-0.04883		54	-0.05188
54.0938	-0.05188		54.0625	-0.05798		54.125	-0.03052
54.1875	-0.06409		54.1875	-0.06714		54.25	-0.04883
54.2969	-0.06714		54.25	-0.06409		54.375	-0.06714
54.3906	-0.07324		54.375	-0.06714		54.5	-0.06714
54.5	-0.07629		54.5	-0.0885		54.5	-0.07019
54.5938	-0.07629		54.5625	-0.09155		54.625	-0.06714
54.6875	-0.06714		54.6875	-0.08545		54.75	-0.06104
54.7969	-0.07324		54.75	-0.0824		54.875	-0.07019
54.8906	-0.06409		54.875	-0.09766		55	-0.07324
55	-0.06409		55	-0.09766		55	-0.07019
55.0938	-0.05493		55.0625	-0.09766		55.125	-0.06409
55.1875	-0.04883		55.1875	-0.10071		55.25	-0.02747
55.2969	-0.05188		55.25	-0.10071		55.375	-0.02747
55.3906	-0.05798		55.375	-0.09155		55.5	-0.04272
55.5	-0.07019		55.5	-0.07324		55.5	-0.03662
55.5938	-0.05493		55.5625	-0.07629		55.625	-0.04578
55.6875	-0.06714		55.6875	-0.06104		55.75	-0.05493
55.7969	-0.05798		55.75	-0.07019		55.875	-0.07019
55.8906	-0.05493		55.875	-0.06714		56	-0.06714
56	-0.07324		56	-0.05798		56	-0.0824
56.0938	-0.05798		56.0625	-0.04883		56.125	-0.07324
56.1875	-0.06714		56.1875	-0.04578		56.25	-0.0885
56.2969	-0.05493		56.25	-0.04578		56.375	-0.07935
56.3906	-0.05493		56.375	-0.06104		56.5	-0.0885
56.5	-0.04883		56.5	-0.07324		56.5	-0.11902
56.5938	-0.05493		56.5625	-0.06104		56.625	-0.10681
56.6875	-0.04883		56.6875	-0.07629		56.75	-0.10986
56.7969	-0.06104		56.75	-0.08545		56.875	-0.10071
56.8906	-0.05188		56.875	-0.0946		57	-0.0824
57	-0.04272		57	-0.10071		57	-0.09155
57.0938	-0.04578		57.0625	-0.06409		57.125	-0.0885
57.1875	-0.04883		57.1875	-0.06104		57.25	-0.07629
57.2969	-0.05493		57.25	-0.08545		57.375	-0.07019
57.3906	-0.03967		57.375	-0.0946		57.5	-0.07019
57.5	-0.03662		57.5	-0.09766		57.5	-0.06409
57.5938	-0.05188		57.5625	-0.09155		57.625	-0.05493
57.6875	-0.05798		57.6875	-0.04883		57.75	-0.06104
57.7969	-0.06104		57.75	-0.06409		57.875	-0.06714
57.8906	-0.03967		57.875	-0.07019		58	-0.05188
58	-0.03357		58	-0.09766		58	-0.06409
58.0938	-0.01221		58.0625	-0.10681		58.125	-0.06409
58.1875	-0.03052		58.1875	-0.10376		58.25	-0.06714
58.2969	-0.03357		58.25	-0.0885		58.375	-0.06409
58.3906	-0.04578		58.375	-0.06714		58.5	-0.06714
58.5	-0.02441		58.5	-0.0824		58.5	-0.05493
58.5938	-0.02136		58.5625	-0.06409		58.625	-0.04883
58.6875	-0.03357		58.6875	-0.06714		58.75	-0.04883
58.7969	-0.04272		58.75	-0.07019		58.875	-0.04272
58.8906	-0.04883		58.875	-0.06409		59	-0.06409
59	-0.02136		59	-0.05798		59	-0.04883
59.0938	0.00305		59.0625	-0.04578		59.125	-0.04578
59.1875	-0.02136		59.1875	-0.05188		59.25	-0.03967
59.2969	-0.04883		59.25	-0.03357		59.375	-0.06714
59.3906	-0.06409		59.375	-0.03662		59.5	-0.07629
59.5	-0.06104		59.5	-0.02747		59.5	-0.07019
59.5938	-0.05493		59.5625	-0.02441		59.625	-0.06714
59.6875	-0.04578		59.6875	-0.03052		59.75	-0.05798
59.7969	-0.04272		59.75	-0.05188		59.875	-0.08545
59.8906	-0.02747		59.875	-0.03662		60	-0.07629
60	-0.01526		60	-0.03662		60	-0.08545
60.0938	-0.03662		60.0625	-0.04272		60.125	-0.07935
60.1875	-0.04578		60.1875	-0.03662		60.25	-0.05493
60.2969	-0.06714		60.25	-0.04883		60.375	-0.05188
60.3906	-0.08545		60.375	-0.03052		60.5	-0.03662
60.5	-0.07019		60.5	-0.04272		60.5	-0.06104
60.5938	-0.07629		60.5625	-0.03357		60.625	-0.07324
60.6875	-0.05188		60.6875	-0.03357		60.75	-0.07019
60.7969	-0.06409		60.75	-0.07324		60.875	-0.06409
60.8906	-0.06409		60.875	-0.07324		61	-0.06104
61	-0.06714		61	-0.06104		61	-0.02136
61.0938	-0.08545		61.0625	-0.04578		61.125	-0.02441
61.1875	-0.09155		61.1875	-0.01221		61.25	-0.03357
61.2969	-0.0946		61.25	-0.00916		61.375	-0.03662
61.3906	-0.09155		61.375	-0.04578		61.5	-0.04578
61.5	-0.0946		61.5	-0.06714		61.5	-0.03357
61.5938	-0.10071		61.5625	-0.08545		61.625	-0.04272
61.6875	-0.0885		61.6875	-0.06409		61.75	-0.03967
61.7969	-0.0824		61.75	-0.04883		61.875	-0.03967
61.8906	-0.07019		61.875	-0.03662		62	-0.05188
62	-0.0824		62	-0.04578		62	-0.06714
62.0938	-0.09766		62.0625	-0.06104		62.125	-0.06714
62.1875	-0.10071		62.1875	-0.06714		62.25	-0.07629
62.2969	-0.0885		62.25	-0.07935		62.375	-0.07629
62.3906	-0.07019		62.375	-0.06104		62.5	-0.05493
62.5	-0.05798		62.5	-0.06714		62.5	-0.05798
62.5938	-0.04883		62.5625	-0.05798		62.625	-0.05188
62.6875	-0.05188		62.6875	-0.03967		62.75	-0.05798
62.7969	-0.0824		62.75	-0.04883		62.875	-0.04272
62.8906	-0.08545		62.875	-0.05188		63	-0.03357
63	-0.06714		63	-0.04578		63	-0.04578
63.0938	-0.06714		63.0625	-0.05493		63.125	-0.04883
63.1875	-0.04578		63.1875	-0.05798		63.25	-0.04272
63.2969	-0.05188		63.25	-0.06409		63.375	-0.04272
63.3906	-0.06714		63.375	-0.07629		63.5	-0.05493
63.5	-0.07019		63.5	-0.06409		63.5	-0.03662
63.5938	-0.09155		63.5625	-0.07629		63.625	-0.04883
63.6875	-0.0885		63.6875	-0.06714		63.75	-0.03052
63.7969	-0.07629		63.75	-0.06104		63.875	-0.04272
63.8906	-0.06714		63.875	-0.04578		64	-0.04578
64	-0.05493		64	-0.04272		64	-0.02441
64.0938	-0.04883		64.0625	-0.03357		64.125	-0.04578
64.1875	-0.06714		64.1875	-0.02441		64.25	-0.03967
64.2969	-0.05798		64.25	-0.02747		64.375	-0.04578
64.3906	-0.07019		64.375	-0.02747		64.5	-0.04578
64.5	-0.07019		64.5	-0.03662		64.5	-0.06714
64.5938	-0.06104		64.5625	-0.03662		64.625	-0.05798
64.6875	-0.06409		64.6875	-0.03967		64.75	-0.06409
64.7969	-0.05493		64.75	-0.03967		64.875	-0.07629
64.8906	-0.07019		64.875	-0.04272		65	-0.07629
65	-0.06104		65	-0.07019		65	-0.0824
65.0938	-0.04883		65.0625	-0.05188		65.125	-0.07935
65.1875	-0.05798		65.1875	-0.07935		65.25	-0.08545
65.2969	-0.07324		65.25	-0.06409		65.375	-0.06104
65.3906	-0.0824		65.375	-0.06104		65.5	-0.04883
65.5	-0.07019		65.5	-0.06104		65.5	-0.05493
65.5938	-0.06104		65.5625	-0.06409		65.625	-0.05188
65.6875	-0.05188		65.6875	-0.05798		65.75	-0.04272
65.7969	-0.05798		65.75	-0.05493		65.875	-0.06104
65.8906	-0.05798		65.875	-0.06104		66	-0.05798
66	-0.07629		66	-0.04272		66	-0.04883
66.0938	-0.06409		66.0625	-0.06104		66.125	-0.05493
66.1875	-0.07935		66.1875	-0.03662		66.25	-0.04883
66.2969	-0.07324		66.25	-0.04272		66.375	-0.04578
66.3906	-0.0885		66.375	-0.03967		66.5	-0.03967
66.5	-0.07019		66.5	-0.04578		66.5	-0.01831
66.5938	-0.0885		66.5625	-0.04272		66.625	-0.03052
66.6875	-0.0824		66.6875	-0.03052		66.75	-0.03967
66.7969	-0.07019		66.75	-0.05188		66.875	-0.06409
66.8906	-0.05188		66.875	-0.05798		67	-0.06409
67	-0.02136		67	-0.07019		67	-0.06714
67.0938	-0.03052		67.0625	-0.04578		67.125	-0.05188
67.1875	-0.03662		67.1875	-0.04272		67.25	-0.05188
67.2969	-0.04272		67.25	-0.01831		67.375	-0.03967
67.3906	-0.03967		67.375	-0.02136		67.5	-0.04272
67.5	-0.03967		67.5	-0.00916		67.5	-0.04883
67.5938	-0.05188		67.5625	-0.01526		67.625	-0.04578
67.6875	-0.04272		67.6875	-0.03967		67.75	-0.05188
67.7969	-0.05798		67.75	-0.04578		67.875	-0.05493
67.8906	-0.06409		67.875	-0.05493		68	-0.05188
68	-0.0824		68	-0.03967		68	-0.06409
68.0938	-0.07019		68.0625	-0.04272		68.125	-0.06104
68.1875	-0.07629		68.1875	-0.03967		68.25	-0.06409
68.2969	-0.07629		68.25	-0.04883		68.375	-0.06104
68.3906	-0.0946		68.375	-0.05493		68.5	-0.06409
68.5	-0.07629		68.5	-0.05188		68.5	-0.09155
68.5938	-0.07935		68.5625	-0.06409		68.625	-0.08545
68.6875	-0.07629		68.6875	-0.06104		68.75	-0.0824
68.7969	-0.08545		68.75	-0.07324		68.875	-0.08545
68.8906	-0.0885		68.875	-0.07019		69	-0.0824
69	-0.07935		69	-0.07324		69	-0.09766
69.0938	-0.10071		69.0625	-0.0946		69.125	-0.10376
69.1875	-0.10681		69.1875	-0.09766		69.25	-0.10071
69.2969	-0.07935		69.25	-0.10681		69.375	-0.0885
69.3906	-0.07019		69.375	-0.10986		69.5	-0.09766
69.5	-0.07629		69.5	-0.10071		69.5	-0.0946
69.5938	-0.09766		69.5625	-0.10071		69.625	-0.10071
69.6875	-0.09766		69.6875	-0.0946		69.75	-0.10071
69.7969	-0.12207		69.75	-0.09155		69.875	-0.07324
69.8906	-0.10681		69.875	-0.09766		70	-0.07019
70	-0.0946		70	-0.0885		70	-0.04883
70.0938	-0.07629		70.0625	-0.09155		70.125	-0.06104
70.1875	-0.07935		70.1875	-0.0946		70.25	-0.08545
70.2969	-0.10071		70.25	-0.10376		70.375	-0.09155
70.3906	-0.10071		70.375	-0.08545		70.5	-0.09155
70.5	-0.10376		70.5	-0.10071		70.5	-0.08545
70.5938	-0.10071		70.5625	-0.10376		70.625	-0.05493
70.6875	-0.0946		70.6875	-0.06714		70.75	-0.05798
70.7969	-0.08545		70.75	-0.06104		70.875	-0.07019
70.8906	-0.05798		70.875	-0.03662		71	-0.07629
71	-0.05493		71	-0.03967		71	-0.07019
71.0938	-0.04883		71.0625	-0.05798		71.125	-0.06409
71.1875	-0.06104		71.1875	-0.05798		71.25	-0.06714
71.2969	-0.05798		71.25	-0.05798		71.375	-0.04578
71.3906	-0.06104		71.375	-0.04272		71.5	-0.03967
71.5	-0.04883		71.5	-0.04578		71.5	-0.04272
71.5938	-0.06409		71.5625	-0.05798		71.625	-0.04272
71.6875	-0.05798		71.6875	-0.06714		71.75	-0.07935
71.7969	-0.05493		71.75	-0.09155		71.875	-0.0885
71.8906	-0.03052		71.875	-0.10071		72	-0.08545
72	-0.03357		72	-0.0946		72	-0.06714
72.0938	-0.01221		72.0625	-0.09155		72.125	-0.06104
72.1875	-0.01526		72.1875	-0.09155		72.25	-0.03967
72.2969	-0.03357		72.25	-0.0824		72.375	-0.05493
72.3906	-0.04272		72.375	-0.0824		72.5	-0.06409
72.5	-0.06714		72.5	-0.0824		72.5	-0.07324
72.5938	-0.04578		72.5625	-0.07935		72.625	-0.06104
72.6875	-0.03662		72.6875	-0.07324		72.75	-0.06714
72.7969	-0.02441		72.75	-0.08545		72.875	-0.0824
72.8906	-0.0061		72.875	-0.07019		73	-0.08545
73	-0.01526		73	-0.06409		73	-0.10071
73.0938	-0.01526		73.0625	-0.05798		73.125	-0.07935
73.1875	-0.04272		73.1875	-0.07629		73.25	-0.0824
73.2969	-0.05493		73.25	-0.08545		73.375	-0.07629
73.3906	-0.06714		73.375	-0.0824		73.5	-0.06714
73.5	-0.06409		73.5	-0.0885		73.5	-0.0824
73.5938	-0.06104		73.5625	-0.07935		73.625	-0.05188
73.6875	-0.03967		73.6875	-0.06714		73.75	-0.06409
73.7969	-0.03357		73.75	-0.05798		73.875	-0.05798
73.8906	-0.01831		73.875	-0.05188		74	-0.07019
74	-0.00916		74	-0.06104		74	-0.06714
74.0938	-0.01526		74.0625	-0.07019		74.125	-0.04883
74.1875	-0.01831		74.1875	-0.05188		74.25	-0.04272
74.2969	-0.05188		74.25	-0.06714		74.375	-0.04883
74.3906	-0.06714		74.375	-0.05798		74.5	-0.05493
74.5	-0.07935		74.5	-0.04883		74.5	-0.04578
74.5938	-0.07629		74.5625	-0.05798		74.625	-0.07324
74.6875	-0.07629		74.6875	-0.03662		74.75	-0.04578
74.7969	-0.07629		74.75	-0.04578		74.875	-0.05493
74.8906	-0.07324		74.875	-0.03967		75	-0.07019
75	-0.07629		75	-0.05798		75	-0.07019
75.0938	-0.06714		75.0625	-0.05798		75.125	-0.07629
75.1875	-0.06409		75.1875	-0.04272		75.25	-0.07629
75.2969	-0.04883		75.25	-0.02747		75.375	-0.05493
75.3906	-0.07019		75.375	-0.04272		75.5	-0.05798
75.5	-0.06714		75.5	-0.04272		75.5	-0.07629
75.5938	-0.06409		75.5625	-0.02747		75.625	-0.07019
75.6875	-0.05493		75.6875	-0.03662		75.75	-0.0824
75.7969	-0.05188		75.75	-0.03052		75.875	-0.07935
75.8906	-0.05493		75.875	-0.02747		76	-0.07019
76	-0.06104		76	-0.03357		76	-0.07629
76.0938	-0.04578		76.0625	-0.05493		76.125	-0.07629
76.1875	-0.04578		76.1875	-0.06409		76.25	-0.0824
76.2969	-0.05188		76.25	-0.07935		76.375	-0.0824
76.3906	-0.05188		76.375	-0.0885		76.5	-0.10071
76.5	-0.03662		76.5	-0.0885		76.5	-0.09766
76.5938	-0.06104		76.5625	-0.08545		76.625	-0.11597
76.6875	-0.03967		76.6875	-0.08545		76.75	-0.09155
76.7969	-0.04578		76.75	-0.0824		76.875	-0.09155
76.8906	-0.04883		76.875	-0.07629		77	-0.07324
77	-0.05188		77	-0.09155		77	-0.07324
77.0938	-0.06104		77.0625	-0.07935		77.125	-0.06409
77.1875	-0.07629		77.1875	-0.07324		77.25	-0.06104
77.2969	-0.06104		77.25	-0.0946		77.375	-0.07629
77.3906	-0.06714		77.375	-0.10376		77.5	-0.04578
77.5	-0.06104		77.5	-0.11597		77.5	-0.05493
77.5938	-0.05188		77.5625	-0.10681		77.625	-0.06714
77.6875	-0.04272		77.6875	-0.08545		77.75	-0.06714
77.7969	-0.05798		77.75	-0.07324		77.875	-0.05798
77.8906	-0.06104		77.875	-0.0885		78	-0.05493
78	-0.07629		78	-0.0946		78	-0.07324
78.0938	-0.07019		78.0625	-0.10071		78.125	-0.0824
78.1875	-0.06714		78.1875	-0.09766		78.25	-0.08545
78.2969	-0.05188		78.25	-0.09155		78.375	-0.06409
78.3906	-0.06714		78.375	-0.0885		78.5	-0.06409
78.5	-0.06409		78.5	-0.07019		78.5	-0.07019
78.5938	-0.06104		78.5625	-0.07935		78.625	-0.05188
78.6875	-0.04272		78.6875	-0.0824		78.75	-0.04272
78.7969	-0.05188		78.75	-0.0885		78.875	-0.04883
78.8906	-0.05493		78.875	-0.08545		79	-0.04272
79	-0.03357		79	-0.08545		79	-0.06409
79.0938	-0.02441		79.0625	-0.08545		79.125	-0.06409
79.1875	-0.02441		79.1875	-0.07629		79.25	-0.05188
79.2969	-0.03052		79.25	-0.08545		79.375	-0.06409
79.3906	-0.03662		79.375	-0.05798		79.5	-0.05493
79.5	-0.04272		79.5	-0.04578		79.5	-0.07019
79.5938	-0.05493		79.5625	-0.03052		79.625	-0.05493
79.6875	-0.04883		79.6875	-0.01831		79.75	-0.04578
79.7969	-0.04578		79.75	-0.02747		79.875	-0.05188
79.8906	-0.03967		79.875	-0.02441		80	-0.07935
80	-0.03357		80	-0.03967		80	-0.08545
80.0938	-0.04578		80.0625	-0.03052		80.125	-0.05493
80.1875	-0.04578		80.1875	-0.04272		80.25	-0.05493
80.2969	-0.04272		80.25	-0.03662		80.375	-0.03967
80.3906	-0.04272		80.375	-0.03967		80.5	-0.04578
80.5	-0.04578		80.5	-0.03052		80.5	-0.05798
80.5938	-0.04272		80.5625	-0.03357		80.625	-0.06409
80.6875	-0.04272		80.6875	-0.03967		80.75	-0.06409
80.7969	-0.06409		80.75	-0.06104		80.875	-0.05188
80.8906	-0.06409		80.875	-0.06104		81	-0.03967
81	-0.09766		81	-0.05798		81	-0.04272
81.0938	-0.07019		81.0625	-0.04272		81.125	-0.05493
81.1875	-0.07019		81.1875	-0.03052		81.25	-0.05798
81.2969	-0.06714		81.25	-0.03052		81.375	-0.06104
81.3906	-0.07935		81.375	-0.02136		81.5	-0.04272
81.5	-0.08545		81.5	-0.03662		81.5	-0.03662
81.5938	-0.0946		81.5625	-0.03662		81.625	-0.02747
81.6875	-0.10071		81.6875	-0.03967		81.75	-0.05798
81.7969	-0.10376		81.75	-0.05493		81.875	-0.04883
81.8906	-0.10986		81.875	-0.05188		82	-0.05493
82	-0.09766		82	-0.06104		82	-0.07019
82.0938	-0.08545		82.0625	-0.04578		82.125	-0.0824
82.1875	-0.09155		82.1875	-0.05798		82.25	-0.07019
82.2969	-0.07935		82.25	-0.04883		82.375	-0.06104
82.3906	-0.06409		82.375	-0.04272		82.5	-0.04272
82.5	-0.06409		82.5	-0.05188		82.5	-0.04272
82.5938	-0.06409		82.5625	-0.05798		82.625	-0.05798
82.6875	-0.07629		82.6875	-0.05798		82.75	-0.04272
82.7969	-0.09766		82.75	-0.07019		82.875	-0.04883
82.8906	-0.10376		82.875	-0.06714		83	-0.04272
83	-0.11292		83	-0.06104		83	-0.03662
83.0938	-0.0946		83.0625	-0.07324		83.125	-0.03357
83.1875	-0.08545		83.1875	-0.04883		83.25	-0.02747
83.2969	-0.06714		83.25	-0.05798		83.375	-0.04272
83.3906	-0.05798		83.375	-0.06409		83.5	-0.04578
83.5	-0.06714		83.5	-0.05798		83.5	-0.06714
83.5938	-0.05493		83.5625	-0.07019		83.625	-0.07019
83.6875	-0.05798		83.6875	-0.04883		83.75	-0.05493
83.7969	-0.06409		83.75	-0.04883		83.875	-0.04578
83.8906	-0.06714		83.875	-0.04883		84	-0.03662
84	-0.07324		84	-0.06409		84	-0.03967
84.0938	-0.06104		84.0625	-0.06104		84.125	-0.03052
84.1875	-0.07324		84.1875	-0.07324		84.25	-0.03662
84.2969	-0.07935		84.25	-0.06714		84.375	-0.04578
84.3906	-0.06714		84.375	-0.06104		84.5	-0.06714
84.5	-0.05798		84.5	-0.05798		84.5	-0.07019
84.5938	-0.06714		84.5625	-0.06714		84.625	-0.07324
84.6875	-0.04883		84.6875	-0.04578		84.75	-0.05493
84.7969	-0.06409		84.75	-0.04578		84.875	-0.05188
84.8906	-0.04578		84.875	-0.04883		85	-0.06714
85	-0.03967		85	-0.04578		85	-0.04883
85.0938	-0.03967		85.0625	-0.05798		85.125	-0.06714
85.1875	-0.03662		85.1875	-0.05493		85.25	-0.07019
85.2969	-0.04883		85.25	-0.05493		85.375	-0.09155
85.3906	-0.05798		85.375	-0.05798		85.5	-0.07935
85.5	-0.05188		85.5	-0.05493		85.5	-0.07629
85.5938	-0.07324		85.5625	-0.07019		85.625	-0.07324
85.6875	-0.06104		85.6875	-0.07324		85.75	-0.07629
85.7969	-0.06714		85.75	-0.0824		85.875	-0.07324
85.8906	-0.06409		85.875	-0.07629		86	-0.05798
86	-0.07324		86	-0.07935		86	-0.06409
86.0938	-0.05493		86.0625	-0.07324		86.125	-0.04883
86.1875	-0.05493		86.1875	-0.0824		86.25	-0.06409
86.2969	-0.06104		86.25	-0.07324		86.375	-0.03357
86.3906	-0.07629		86.375	-0.06409		86.5	-0.04272
86.5	-0.08545		86.5	-0.06409		86.5	-0.03052
86.5938	-0.07935		86.5625	-0.05188		86.625	-0.01831
86.6875	-0.05188		86.6875	-0.05188		86.75	-0.03052
86.7969	-0.05798		86.75	-0.03967		86.875	-0.02441
86.8906	-0.04578		86.875	-0.04272		87	-0.03967
87	-0.04272		87	-0.03967		87	-0.04272
87.0938	-0.02747		87.0625	-0.04272		87.125	-0.02747
87.1875	-0.04578		87.1875	-0.03967		87.25	-0.01831
87.2969	-0.05188		87.25	-0.00916		87.375	-0.02441
87.3906	-0.05493		87.375	-0.00305		87.5	-0.03052
87.5	-0.04578		87.5	0.0061		87.5	-0.03967
87.5938	-0.04578		87.5625	0.0061		87.625	-0.05493
87.6875	-0.05493		87.6875	0.00305		87.75	-0.05493
87.7969	-0.06409		87.75	-0.0061		87.875	-0.07019
87.8906	-0.05188		87.875	-0.00916		88	-0.05798
88	-0.04883		88	0.0061		88	-0.04272
88.0938	-0.04883		88.0625	0.00305		88.125	-0.03662
88.1875	-0.06714		88.1875	0.00916		88.25	-0.03662
88.2969	-0.07019		88.25	-0.00916		88.375	-0.04883
88.3906	-0.08545		88.375	-0.04272		88.5	-0.03662
88.5	-0.06104		88.5	-0.04272		88.5	-0.03662
88.5938	-0.07629		88.5625	-0.05493		88.625	-0.04272
88.6875	-0.07324		88.6875	-0.05493		88.75	-0.04578
88.7969	-0.0946		88.75	-0.05493		88.875	-0.04272
88.8906	-0.0885		88.875	-0.07019		89	-0.05493
89	-0.11292		89	-0.07019		89	-0.07019
89.0938	-0.12512		89.0625	-0.0824		89.125	-0.09155
89.1875	-0.13123		89.1875	-0.0885		89.25	-0.07935
89.2969	-0.10681		89.25	-0.10376		89.375	-0.0885
89.3906	-0.07935		89.375	-0.10071		89.5	-0.0946
89.5	-0.07629		89.5	-0.09766		89.5	-0.10071
89.5938	-0.07324		89.5625	-0.10376		89.625	-0.10986
89.6875	-0.08545		89.6875	-0.08545		89.75	-0.08545
89.7969	-0.10071		89.75	-0.10376		89.875	-0.0824
89.8906	-0.10071		89.875	-0.09766		90	-0.06104
90	-0.0946		90	-0.0824		90	-0.07935
90.0938	-0.07629		90.0625	-0.07935		90.125	-0.0885
90.1875	-0.07935		90.1875	-0.07935		90.25	-0.07324
90.2969	-0.06714		90.25	-0.10071		90.375	-0.09155
90.3906	-0.10376		90.375	-0.11902		90.5	-0.09155
90.5	-0.0946		90.5	-0.11597		90.5	-0.0824
90.5938	-0.10986		90.5625	-0.11292		90.625	-0.05493
90.6875	-0.09766		90.6875	-0.08545		90.75	-0.07324
90.7969	-0.07935		90.75	-0.07935		90.875	-0.0824
90.8906	-0.06409		90.875	-0.09155		91	-0.0885
91	-0.05493		91	-0.0946		91	-0.07629
91.0938	-0.05493		91.0625	-0.10071		91.125	-0.0824
91.1875	-0.05798		91.1875	-0.09766		91.25	-0.07324
91.2969	-0.06409		91.25	-0.08545		91.375	-0.07629
91.3906	-0.06714		91.375	-0.0885		91.5	-0.06714
91.5	-0.05798		91.5	-0.07629		91.5	-0.05493
91.5938	-0.03967		91.5625	-0.09155		91.625	-0.05188
91.6875	-0.02747		91.6875	-0.08545		91.75	-0.04578
91.7969	-0.04883		91.75	-0.07629		91.875	-0.03357
91.8906	-0.04272		91.875	-0.05798		92	-0.04578
92	-0.04578		92	-0.04883		92	-0.04883
92.0938	-0.03662		92.0625	-0.05188		92.125	-0.05798
92.1875	-0.02747		92.1875	-0.03052		92.25	-0.05798
92.2969	-0.03967		92.25	-0.04883		92.375	-0.05798
92.3906	-0.06409		92.375	-0.05188		92.5	-0.05493
92.5	-0.07019		92.5	-0.06409		92.5	-0.08545
92.5938	-0.08545		92.5625	-0.05188		92.625	-0.09155
92.6875	-0.06104		92.6875	-0.03967		92.75	-0.0824
92.7969	-0.06409		92.75	-0.04883		92.875	-0.05493
92.8906	-0.05188		92.875	-0.03967		93	-0.05493
93	-0.03967		93	-0.03357		93	-0.03967
93.0938	-0.05798		93.0625	-0.03967		93.125	-0.05188
93.1875	-0.05798		93.1875	-0.04883		93.25	-0.05493
93.2969	-0.04578		93.25	-0.05493		93.375	-0.05493
93.3906	-0.03052		93.375	-0.07935		93.5	-0.06409
93.5	-0.01831		93.5	-0.05493		93.5	-0.04578
93.5938	-0.03967		93.5625	-0.07019		93.625	-0.05188
93.6875	-0.05798		93.6875	-0.06104		93.75	-0.04883
93.7969	-0.06104		93.75	-0.06104		93.875	-0.07629
93.8906	-0.06714		93.875	-0.06409		94	-0.0885
94	-0.07019		94	-0.06104		94	-0.07324
94.0938	-0.05798		94.0625	-0.07324		94.125	-0.07324
94.1875	-0.05188		94.1875	-0.06104		94.25	-0.07324
94.2969	-0.03052		94.25	-0.06409		94.375	-0.10071
94.3906	-0.05188		94.375	-0.07629		94.5	-0.07629
94.5	-0.04578		94.5	-0.07935		94.5	-0.08545
94.5938	-0.05188		94.5625	-0.0885		94.625	-0.06409
94.6875	-0.05798		94.6875	-0.07629		94.75	-0.05493
94.7969	-0.06409		94.75	-0.07019		94.875	-0.06409
94.8906	-0.06409		94.875	-0.06714		95	-0.07935
95	-0.05493		95	-0.07019		95	-0.09155
95.0938	-0.04578		95.0625	-0.07324		95.125	-0.08545
95.1875	-0.03662		95.1875	-0.07935		95.25	-0.0885
95.2969	-0.05188		95.25	-0.06714		95.375	-0.07324
95.3906	-0.05493		95.375	-0.07324		95.5	-0.07324
95.5	-0.04578		95.5	-0.07019		95.5	-0.05798
95.5938	-0.05188		95.5625	-0.06714		95.625	-0.06409
95.6875	-0.05188		95.6875	-0.05188		95.75	-0.06104
95.7969	-0.05493		95.75	-0.04272		95.875	-0.07019
95.8906	-0.05188		95.875	-0.05188		96	-0.07019
96	-0.06409		96	-0.05493		96	-0.05798
96.0938	-0.05798		96.0625	-0.06409		96.125	-0.0824
96.1875	-0.06409		96.1875	-0.04272		96.25	-0.06714
96.2969	-0.04272		96.25	-0.04883		96.375	-0.0885
96.3906	-0.05188		96.375	-0.04883		96.5	-0.0946
96.5	-0.04578		96.5	-0.05188		96.5	-0.10376
96.5938	-0.03967		96.5625	-0.05798		96.625	-0.0946
96.6875	-0.03967		96.6875	-0.04883		96.75	-0.0885
96.7969	-0.05798		96.75	-0.05493		96.875	-0.0885
96.8906	-0.04883		96.875	-0.05798		97	-0.0885
97	-0.03662		97	-0.0885		97	-0.09155
97.0938	-0.05798		97.0625	-0.0824		97.125	-0.0885
97.1875	-0.05188		97.1875	-0.07629		97.25	-0.11292
97.2969	-0.04272		97.25	-0.10071		97.375	-0.10376
97.3906	-0.03967		97.375	-0.12207		97.5	-0.10071
97.5	-0.05188		97.5	-0.11902		97.5	-0.07629
97.5938	-0.04272		97.5625	-0.0885		97.625	-0.06409
97.6875	-0.03662		97.6875	-0.07935		97.75	-0.07324
97.7969	-0.06104		97.75	-0.07629		97.875	-0.07324
97.8906	-0.04272		97.875	-0.07629		98	-0.08545
98	-0.05188		98	-0.0824		98	-0.0824
98.0938	-0.05188		98.0625	-0.0946		98.125	-0.08545
98.1875	-0.04578		98.1875	-0.08545		98.25	-0.05798
98.2969	-0.03052		98.25	-0.09155		98.375	-0.06104
98.3906	-0.03357		98.375	-0.08545		98.5	-0.04883
98.5	-0.02747		98.5	-0.07019		98.5	-0.02747
98.5938	-0.02136		98.5625	-0.07019		98.625	-0.03662
98.6875	-0.02136		98.6875	-0.06714		98.75	-0.04883
98.7969	-0.03052		98.75	-0.06409		98.875	-0.04883
98.8906	-0.03662		98.875	-0.06714		99	-0.06104
99	-0.0061		99	-0.06409		99	-0.04883
99.0938	-0.0061		99.0625	-0.06714		99.125	-0.05798
99.1875	-0.01526		99.1875	-0.06714		99.25	-0.03662
99.2969	-0.01526		99.25	-0.07629		99.375	-0.02441
99.3906	-0.02747		99.375	-0.07019		99.5	-0.03052
99.5	-0.03357		99.5	-0.06104		99.5	-0.02747
99.5938	-0.03967		99.5625	-0.06409		99.625	-0.03662
99.6875	-0.02747		99.6875	-0.05188		99.75	-0.03967
99.7969	-0.06104		99.75	-0.05188		99.875	-0.05188
99.8906	-0.04272		99.875	-0.05188		100	-0.05493
100	-0.06409		100	-0.04578		100	-0.03662
100.094	-0.05188		100.062	-0.06104		100.125	-0.05188
100.188	-0.04578		100.188	-0.04883		100.25	-0.03052
100.297	-0.06409		100.25	-0.04272		100.375	-0.03967
100.391	-0.05188		100.375	-0.03967		100.5	-0.03662
100.5	-0.04578		100.5	-0.03967		100.5	-0.05188
100.594	-0.04272		100.562	-0.04883		100.625	-0.05493
100.688	-0.04883		100.688	-0.06104		100.75	-0.06409
100.797	-0.07019		100.75	-0.0946		100.875	-0.05798
100.891	-0.07019		100.875	-0.07019		101	-0.05798
101	-0.06714		101	-0.07935		101	-0.06714
101.094	-0.07629		101.062	-0.04883		101.125	-0.06409
101.188	-0.09155		101.188	-0.02747		101.25	-0.04883
101.297	-0.0885		101.25	-0.02441		101.375	-0.04883
101.391	-0.0946		101.375	-0.02747		101.5	-0.05798
101.5	-0.0946		101.5	-0.03662		101.5	-0.05493
101.594	-0.10376		101.562	-0.04578		101.625	-0.06714
101.688	-0.08545		101.688	-0.05493		101.75	-0.07324
101.797	-0.09766		101.75	-0.04883		101.875	-0.05798
101.891	-0.07935		101.875	-0.05188		102	-0.07629
102	-0.07629		102	-0.03662		102	-0.05798
102.094	-0.0824		102.062	-0.04578		102.125	-0.06409
102.188	-0.09155		102.188	-0.04272		102.25	-0.07324
102.297	-0.0824		102.25	-0.04578		102.375	-0.05798
102.391	-0.06409		102.375	-0.06104		102.5	-0.04578
102.5	-0.05493		102.5	-0.04578		102.5	-0.05493
102.594	-0.04883		102.562	-0.05188		102.625	-0.03967
102.688	-0.05493		102.688	-0.05188		102.75	-0.04883
102.797	-0.07019		102.75	-0.07629		102.875	-0.05798
102.891	-0.06104		102.875	-0.06409		103	-0.06409
103	-0.09155		103	-0.06104		103	-0.0824
103.094	-0.06409		103.062	-0.06409		103.125	-0.06409
103.188	-0.05188		103.188	-0.05188		103.25	-0.0824
103.297	-0.05188		103.25	-0.05493		103.375	-0.07324
103.391	-0.05798		103.375	-0.05188		103.5	-0.06409
103.5	-0.04883		103.5	-0.06104		103.5	-0.07019
103.594	-0.07629		103.562	-0.06104		103.625	-0.06409
103.688	-0.06409		103.688	-0.07019		103.75	-0.07019
103.797	-0.07935		103.75	-0.07324		103.875	-0.04883
103.891	-0.0885		103.875	-0.08545		104	-0.06714
104	-0.0885		104	-0.07935		104	-0.05188
104.094	-0.08545		104.062	-0.09155		104.125	-0.05493
104.188	-0.06409		104.188	-0.0885		104.25	-0.06714
104.297	-0.06104		104.25	-0.08545		104.375	-0.0824
104.391	-0.05493		104.375	-0.08545		104.5	-0.0885
104.5	-0.05188		104.5	-0.07629		104.5	-0.0824
104.594	-0.05798		104.562	-0.06409		104.625	-0.09155
104.688	-0.05188		104.688	-0.05493		104.75	-0.05798
104.797	-0.06104		104.75	-0.05798		104.875	-0.06104
104.891	-0.05188		104.875	-0.05188		105	-0.05188
105	-0.05798		105	-0.06714		105	-0.05188
105.094	-0.05493		105.062	-0.06104		105.125	-0.04578
105.188	-0.06409		105.188	-0.07935		105.25	-0.05798
105.297	-0.05493		105.25	-0.07324		105.375	-0.03967
105.391	-0.08545		105.375	-0.06104		105.5	-0.03662
105.5	-0.06104		105.5	-0.06714		105.5	-0.05798
105.594	-0.0824		105.562	-0.05493		105.625	-0.05188
105.688	-0.07935		105.688	-0.07935		105.75	-0.06409
105.797	-0.0824		105.75	-0.06409		105.875	-0.04883
105.891	-0.09155		105.875	-0.06409		106	-0.06104
106	-0.07019		106	-0.05493		106	-0.04883
106.094	-0.06714		106.062	-0.05188		106.125	-0.03967
106.188	-0.06714		106.188	-0.04272		106.25	-0.03662
106.297	-0.07629		106.25	-0.04578		106.375	-0.06104
106.391	-0.06104		106.375	-0.04272		106.5	-0.04272
106.5	-0.03967		106.5	-0.04272		106.5	-0.01526
106.594	-0.06104		106.562	-0.04578		106.625	-0.03967
106.688	-0.05798		106.688	-0.04272		106.75	-0.02441
106.797	-0.06714		106.75	-0.05188		106.875	-0.04272
106.891	-0.05798		106.875	-0.03357		107	-0.04272
107	-0.06104		107	-0.03052		107	-0.03967
107.094	-0.05188		107.062	-0.01526		107.125	-0.03357
107.188	-0.06409		107.188	-0.04883		107.25	-0.02136
107.297	-0.06409		107.25	-0.03662		107.375	-0.02441
107.391	-0.09155		107.375	-0.01221		107.5	-0.02441
107.5	-0.07935		107.5	-0.01831		107.5	-0.04272
107.594	-0.05493		107.562	0.00305		107.625	-0.03662
107.688	-0.06104		107.688	-0.02441		107.75	-0.03662
107.797	-0.07019		107.75	-0.03052		107.875	-0.03662
107.891	-0.07629		107.875	-0.02747		108	-0.04578
108	-0.07629		108	0		108	-0.04883
108.094	-0.08545		108.062	0.00305		108.125	-0.03967
108.188	-0.08545		108.188	-0.01526		108.25	-0.04578
108.297	-0.0885		108.25	-0.01526		108.375	-0.05798
108.391	-0.07935		108.375	-0.03052		108.5	-0.05798
108.5	-0.0824		108.5	-0.03357		108.5	-0.05188
108.594	-0.09155		108.562	-0.05188		108.625	-0.04578
108.688	-0.0885		108.688	-0.06104		108.75	-0.06104
108.797	-0.11597		108.75	-0.07935		108.875	-0.07019
108.891	-0.10376		108.875	-0.07324		109	-0.06104
109	-0.12512		109	-0.06104		109	-0.06714
109.094	-0.13733		109.062	-0.0885		109.125	-0.07019
109.188	-0.11597		109.188	-0.09155		109.25	-0.06714
109.297	-0.09155		109.25	-0.11597		109.375	-0.07629
109.391	-0.07935		109.375	-0.11292		109.5	-0.07935
109.5	-0.07019		109.5	-0.10986		109.5	-0.0946
109.594	-0.07019		109.562	-0.10681		109.625	-0.0885
109.688	-0.0824		109.688	-0.0885		109.75	-0.09155
109.797	-0.08545		109.75	-0.0885		109.875	-0.07019
109.891	-0.06104		109.875	-0.07629		110	-0.05493
110	-0.07019		110	-0.08545		110	-0.04883
110.094	-0.05188		110.062	-0.10376		110.125	-0.06104
110.188	-0.05188		110.188	-0.10681		110.25	-0.07935
110.297	-0.05188		110.25	-0.10071		110.375	-0.07629
110.391	-0.03357		110.375	-0.11292		110.5	-0.0885
110.5	-0.04272		110.5	-0.09766		110.5	-0.09155
110.594	-0.05188		110.562	-0.08545		110.625	-0.0885
110.688	-0.05493		110.688	-0.07019		110.75	-0.08545
110.797	-0.05493		110.75	-0.06409		110.875	-0.07324
110.891	-0.05188		110.875	-0.05188		111	-0.07629
111	-0.07019		111	-0.04883		111	-0.07324
111.094	-0.03967		111.062	-0.07629		111.125	-0.07935
111.188	-0.04272		111.188	-0.07019		111.25	-0.08545
111.297	-0.02747		111.25	-0.09155		111.375	-0.10376
111.391	-0.04883		111.375	-0.0885		111.5	-0.0824
111.5	-0.05188		111.5	-0.0824		111.5	-0.07935
111.594	-0.05798		111.562	-0.07629		111.625	-0.05798
111.688	-0.05493		111.688	-0.06714		111.75	-0.06104
111.797	-0.04272		111.75	-0.07019		111.875	-0.06714
111.891	-0.04883		111.875	-0.05798		112	-0.0885
112	-0.05188		112	-0.05798		112	-0.0885
112.094	-0.04883		112.062	-0.05798		112.125	-0.07935
112.188	-0.03052		112.188	-0.05188		112.25	-0.07324
112.297	-0.02441		112.25	-0.03967		112.375	-0.06409
112.391	-0.05188		112.375	-0.04578		112.5	-0.04883
112.5	-0.07019		112.5	-0.03967		112.5	-0.05188
112.594	-0.07019		112.562	-0.04883		112.625	-0.06714
112.688	-0.05798		112.688	-0.04883		112.75	-0.07629
112.797	-0.03662		112.75	-0.05798		112.875	-0.08545
112.891	-0.03357		112.875	-0.07629		113	-0.07019
113	-0.04578		113	-0.06409		113	-0.04883
113.094	-0.04272		113.062	-0.07629		113.125	-0.06409
113.188	-0.04883		113.188	-0.06714		113.25	-0.06714
113.297	-0.04272		113.25	-0.05493		113.375	-0.06409
113.391	-0.05188		113.375	-0.04883		113.5	-0.04272
113.5	-0.04578		113.5	-0.03662		113.5	-0.06714
113.594	-0.03967		113.562	-0.04883		113.625	-0.04883
113.688	-0.04883		113.688	-0.05798		113.75	-0.07019
113.797	-0.04883		113.75	-0.06714		113.875	-0.06409
113.891	-0.05188		113.875	-0.06409		114	-0.05798
114	-0.05188		114	-0.04578		114	-0.0824
114.094	-0.04578		114.062	-0.05493		114.125	-0.07935
114.188	-0.05493		114.188	-0.04883		114.25	-0.10071
114.297	-0.05188		114.25	-0.06104		114.375	-0.07935
114.391	-0.05798		114.375	-0.06409		114.5	-0.06409
114.5	-0.04883		114.5	-0.06714		114.5	-0.05188
114.594	-0.05798		114.562	-0.06104		114.625	-0.06104
114.688	-0.06104		114.688	-0.05798		114.75	-0.05493
114.797	-0.07019		114.75	-0.05798		114.875	-0.04883
114.891	-0.07019		114.875	-0.05493		115	-0.04578
115	-0.07629		115	-0.06714		115	-0.04272
115.094	-0.07019		115.062	-0.06409		115.125	-0.05188
115.188	-0.07324		115.188	-0.06714		115.25	-0.05188
115.297	-0.07629		115.25	-0.07935		115.375	-0.06409
115.391	-0.07629		115.375	-0.07324		115.5	-0.05798
115.5	-0.07935		115.5	-0.05798		115.5	-0.07629
115.594	-0.06714		115.562	-0.05188		115.625	-0.06409
115.688	-0.05798		115.688	-0.05493		115.75	-0.07324
115.797	-0.06409		115.75	-0.06104		115.875	-0.07629
115.891	-0.06409		115.875	-0.06714		116	-0.0824
116	-0.07324		116	-0.06409		116	-0.07019
116.094	-0.06409		116.062	-0.04883		116.125	-0.04883
116.188	-0.06104		116.188	-0.03967		116.25	-0.06714
116.297	-0.04578		116.25	-0.02747		116.375	-0.07019
116.391	-0.05493		116.375	-0.03052		116.5	-0.10376
116.5	-0.04883		116.5	-0.05798		116.5	-0.10376
116.594	-0.04272		116.562	-0.06409		116.625	-0.09766
116.688	-0.03662		116.688	-0.06409		116.75	-0.0885
116.797	-0.03052		116.75	-0.07019		116.875	-0.07324
116.891	-0.03662		116.875	-0.06409		117	-0.06409
117	-0.02747		117	-0.06104		117	-0.05493
117.094	-0.04883		117.062	-0.06714		117.125	-0.0824
117.188	-0.05493		117.188	-0.05188		117.25	-0.07629
117.297	-0.05493		117.25	-0.07019		117.375	-0.07935
117.391	-0.06409		117.375	-0.10376		117.5	-0.07019
117.5	-0.05188		117.5	-0.10681		117.5	-0.07629
117.594	-0.06104		117.562	-0.09155		117.625	-0.07324
117.688	-0.05493		117.688	-0.0885		117.75	-0.06409
117.797	-0.04578		117.75	-0.07629		117.875	-0.07629
117.891	-0.03967		117.875	-0.07629		118	-0.06104
118	-0.04883		118	-0.0885		118	-0.07019
118.094	-0.05493		118.062	-0.10681		118.125	-0.07324
118.188	-0.05493		118.188	-0.0885		118.25	-0.07324
118.297	-0.04578		118.25	-0.08545		118.375	-0.06714
118.391	-0.03662		118.375	-0.08545		118.5	-0.06104
118.5	-0.02136		118.5	-0.08545		118.5	-0.06104
118.594	-0.01526		118.562	-0.07629		118.625	-0.06104
118.688	-0.03357		118.688	-0.06409		118.75	-0.05493
118.797	-0.04578		118.75	-0.06409		118.875	-0.04272
118.891	-0.03052		118.875	-0.07324		119	-0.04883
119	-0.02747		119	-0.05493		119	-0.04272
119.094	-0.02441		119.062	-0.05493		119.125	-0.05188
119.188	-0.02441		119.188	-0.05798		119.25	-0.04578
119.297	-0.03662		119.25	-0.06409		119.375	-0.03967
119.391	-0.05188		119.375	-0.05493		119.5	-0.02747
119.5	-0.05798		119.5	-0.06409		119.5	-0.03357
119.594	-0.04578		119.562	-0.06409		119.625	-0.03052
119.688	-0.03967		119.688	-0.06104		119.75	-0.01831
119.797	-0.03052		119.75	-0.07629		119.875	-0.03662
119.891	-0.02136		119.875	-0.05493		120	-0.03052
120	-0.00916		120	-0.06409		120	-0.07019
120.094	-0.00916		120.062	-0.06409		120.125	-0.06714
120.188	-0.0061		120.188	-0.05798		120.25	-0.06409
120.297	-0.00305		120.25	-0.07019		120.375	-0.07324
120.391	-0.01831		120.375	-0.06104		120.5	-0.05493
120.5	-0.0061		120.5	-0.06714		120.5	-0.05798
120.594	-0.03052		120.562	-0.05493		120.625	-0.05188
120.688	-0.04578		120.688	-0.06409		120.75	-0.05493
120.797	-0.07019		120.75	-0.06409		120.875	-0.04578
120.891	-0.0946		120.875	-0.04883		121	-0.03967
121	-0.0946		121	-0.05188		121	-0.03357
121.094	-0.10986		121.062	-0.04272		121.125	-0.03357
121.188	-0.11597		121.188	-0.04883		121.25	-0.02747
121.297	-0.11292		121.25	-0.03662		121.375	-0.04578
121.391	-0.0885		121.375	-0.05493		121.5	-0.04883
121.5	-0.08545		121.5	-0.07019		121.5	-0.07935
121.594	-0.0824		121.562	-0.06714		121.625	-0.0885
121.688	-0.07019		121.688	-0.07935		121.75	-0.07935
121.797	-0.0824		121.75	-0.06714		121.875	-0.0824
121.891	-0.0885		121.875	-0.03662		122	-0.0824
122	-0.09766		122	-0.04578		122	-0.07629
122.094	-0.09766		122.062	-0.04883		122.125	-0.06714
122.188	-0.11292		122.188	-0.05798		122.25	-0.05493
122.297	-0.10681		122.25	-0.07019		122.375	-0.06409
122.391	-0.11597		122.375	-0.07324		122.5	-0.04883
122.5	-0.07629		122.5	-0.06714		122.5	-0.06714
122.594	-0.06104		122.562	-0.06104		122.625	-0.07629
122.688	-0.05798		122.688	-0.06714		122.75	-0.05798
122.797	-0.06104		122.75	-0.06104		122.875	-0.05188
122.891	-0.07324		122.875	-0.06104		123	-0.06714
123	-0.06104		123	-0.07019		123	-0.05493
123.094	-0.06409		123.062	-0.07324		123.125	-0.06104
123.188	-0.05493		123.188	-0.07935		123.25	-0.05798
123.297	-0.04272		123.25	-0.07324		123.375	-0.07019
123.391	-0.04578		123.375	-0.07019		123.5	-0.06409
123.5	-0.05798		123.5	-0.06104		123.5	-0.05798
123.594	-0.05493		123.562	-0.08545		123.625	-0.07935
123.688	-0.07019		123.688	-0.0824		123.75	-0.05493
123.797	-0.06409		123.75	-0.07935		123.875	-0.05188
123.891	-0.07019		123.875	-0.06714		124	-0.03967
124	-0.0824		124	-0.05188		124	-0.03967
124.094	-0.07324		124.062	-0.04272		124.125	-0.03662
124.188	-0.10071		124.188	-0.03662		124.25	-0.04883
124.297	-0.07629		124.25	-0.05493		124.375	-0.05493
124.391	-0.05798		124.375	-0.05493		124.5	-0.04272
124.5	-0.04272		124.5	-0.06409		124.5	-0.06409
124.594	-0.03662		124.562	-0.04578		124.625	-0.05188
124.688	-0.04272		124.688	-0.06104		124.75	-0.06409
124.797	-0.04883		124.75	-0.06104		124.875	-0.05493
124.891	-0.06409		124.875	-0.04883		125	-0.06409
125	-0.06409		125	-0.05493		125	-0.07324
125.094	-0.06104		125.062	-0.05188		125.125	-0.05798
125.188	-0.06409		125.188	-0.05798		125.25	-0.05188
125.297	-0.07629		125.25	-0.04272		125.375	-0.05188
125.391	-0.07324		125.375	-0.04578		125.5	-0.04272
125.5	-0.07324		125.5	-0.03967		125.5	-0.03662
125.594	-0.0824		125.562	-0.05493		125.625	-0.05798
125.688	-0.06714		125.688	-0.03967		125.75	-0.02747
125.797	-0.05798		125.75	-0.04578		125.875	-0.03357
125.891	-0.05188		125.875	-0.03967		126	-0.02747
126	-0.07019		126	-0.03967		126	-0.03967
126.094	-0.06714		126.062	-0.05493		126.125	-0.03662
126.188	-0.06409		126.188	-0.04578		126.25	-0.03967
126.297	-0.06104		126.25	-0.05188		126.375	-0.05493
126.391	-0.07019		126.375	-0.02747		126.5	-0.03967
126.5	-0.06714		126.5	-0.03052		126.5	-0.03052
126.594	-0.05798		126.562	-0.02441		126.625	-0.03357
126.688	-0.05188		126.688	-0.02747		126.75	-0.06714
126.797	-0.05493		126.75	-0.02136		126.875	-0.05798
126.891	-0.06104		126.875	-0.02747		127	-0.05188
127	-0.06104		127	-0.05798		127	-0.03967
127.094	-0.07324		127.062	-0.05188		127.125	-0.03052
127.188	-0.06409		127.188	-0.06409		127.25	-0.02441
127.297	-0.06714		127.25	-0.03357		127.375	-0.02441
127.391	-0.05493		127.375	-0.01221		127.5	-0.05188
127.5	-0.05493		127.5	-0.01221		127.5	-0.06714
127.594	-0.06714		127.562	-0.02441		127.625	-0.08545
127.688	-0.05188		127.688	-0.04578		127.75	-0.09155
127.797	-0.05798		127.75	-0.04578		127.875	-0.09155
127.891	-0.04883		127.875	-0.05493		128	-0.0946
128	-0.08545		128	-0.03357		128	-0.07935
128.094	-0.0824		128.062	-0.02441		128.125	-0.0824
128.188	-0.10376		128.188	-0.02136		128.25	-0.06409
128.297	-0.07935		128.25	-0.04883		128.375	-0.07324
128.391	-0.07629		128.375	-0.04272		128.5	-0.07019
128.5	-0.08545		128.5	-0.04578		128.5	-0.07324
128.594	-0.07629		128.562	-0.04272		128.625	-0.07629
128.688	-0.09155		128.688	-0.04578		128.75	-0.06714
128.797	-0.07019		128.75	-0.06104		128.875	-0.07935
128.891	-0.08545		128.875	-0.05798		129	-0.07324
129	-0.10376		129	-0.07019		129	-0.07019
129.094	-0.10986		129.062	-0.06409		129.125	-0.07935
129.188	-0.10071		129.188	-0.07935		129.25	-0.07935
129.297	-0.0885		129.25	-0.08545		129.375	-0.07629
129.391	-0.08545		129.375	-0.09155		129.5	-0.0885
129.5	-0.0946		129.5	-0.0946		129.5	-0.0946
129.594	-0.09766		129.562	-0.07629		129.625	-0.09155
129.688	-0.10376		129.688	-0.0885		129.75	-0.0885
129.797	-0.11292		129.75	-0.08545		129.875	-0.07324
129.891	-0.11292		129.875	-0.0885		130	-0.05188
130	-0.11292		130	-0.0946		130	-0.04578
130.094	-0.0946		130.062	-0.10376		130.125	-0.07629
130.188	-0.07629		130.188	-0.10986		130.25	-0.07935
130.297	-0.07324		130.25	-0.10376		130.375	-0.10071
130.391	-0.0824		130.375	-0.10681		130.5	-0.07324
130.5	-0.0885		130.5	-0.11902		130.5	-0.05798
130.594	-0.09155		130.562	-0.11292		130.625	-0.04883
130.688	-0.07629		130.688	-0.09766		130.75	-0.04578
130.797	-0.06409		130.75	-0.0824		130.875	-0.07629
130.891	-0.04883		130.875	-0.07629		131	-0.0885
131	-0.03357		131	-0.07324		131	-0.08545
131.094	-0.04578		131.062	-0.07629		131.125	-0.0946
131.188	-0.04883		131.188	-0.0946		131.25	-0.09766
131.297	-0.04883		131.25	-0.07935		131.375	-0.0824
131.391	-0.04883		131.375	-0.0824		131.5	-0.06714
131.5	-0.04272		131.5	-0.07324		131.5	-0.05188
131.594	-0.03357		131.562	-0.06104		131.625	-0.06409
131.688	-0.02136		131.688	-0.07019		131.75	-0.07324
131.797	-0.03052		131.75	-0.07629		131.875	-0.06409
131.891	-0.02136		131.875	-0.08545		132	-0.07019
132	-0.04578		132	-0.07629		132	-0.05493
132.094	-0.03357		132.062	-0.06409		132.125	-0.05493
132.188	-0.02441		132.188	-0.04883		132.25	-0.04578
132.297	-0.03967		132.25	-0.03662		132.375	-0.03967
132.391	-0.06409		132.375	-0.03357		132.5	-0.03662
132.5	-0.09155		132.5	-0.03052		132.5	-0.03662
132.594	-0.0824		132.562	-0.04272		132.625	-0.03967
132.688	-0.07629		132.688	-0.03662		132.75	-0.06409
132.797	-0.04578		132.75	-0.05188		132.875	-0.06409
132.891	-0.02136		132.875	-0.04272		133	-0.05188
133	-0.02747		133	-0.06104		133	-0.04578
133.094	-0.05188		133.062	-0.04272		133.125	-0.04272
133.188	-0.06714		133.188	-0.03357		133.25	-0.05188
133.297	-0.07324		133.25	-0.03967		133.375	-0.04272
133.391	-0.05798		133.375	-0.03967		133.5	-0.04883
133.5	-0.04272		133.5	-0.06104		133.5	-0.07019
133.594	-0.05798		133.562	-0.06104		133.625	-0.07629
133.688	-0.04578		133.688	-0.05798		133.75	-0.06714
133.797	-0.06104		133.75	-0.06104		133.875	-0.06409
133.891	-0.05798		133.875	-0.05493		134	-0.06714
134	-0.05188		134	-0.05188		134	-0.06104
134.094	-0.07935		134.062	-0.06714		134.125	-0.0885
134.188	-0.08545		134.188	-0.07935		134.25	-0.06104
134.297	-0.07935		134.25	-0.0885		134.375	-0.07935
134.391	-0.05798		134.375	-0.09766		134.5	-0.06409
134.5	-0.05493		134.5	-0.0824		134.5	-0.07324
134.594	-0.04883		134.562	-0.0946		134.625	-0.07019
134.688	-0.06409		134.688	-0.10071		134.75	-0.06714
134.797	-0.07629		134.75	-0.08545		134.875	-0.07019
134.891	-0.07935		134.875	-0.08545		135	-0.05798
135	-0.06409		135	-0.0824		135	-0.07629
135.094	-0.06104		135.062	-0.08545		135.125	-0.06104
135.188	-0.05493		135.188	-0.07019		135.25	-0.0824
135.297	-0.03357		135.25	-0.06104		135.375	-0.08545
135.391	-0.04578		135.375	-0.06714		135.5	-0.0946
135.5	-0.03967		135.5	-0.06104		135.5	-0.09155
135.594	-0.03967		135.562	-0.07019		135.625	-0.08545
135.688	-0.03357		135.688	-0.07019		135.75	-0.0946
135.797	-0.03052		135.75	-0.07324		135.875	-0.07935
135.891	-0.03662		135.875	-0.07019		136	-0.08545
136	-0.01831		136	-0.07324		136	-0.07935
136.094	-0.03662		136.062	-0.06409		136.125	-0.07935
136.188	-0.03357		136.188	-0.07324		136.25	-0.06104
136.297	-0.04578		136.25	-0.07629		136.375	-0.07324
136.391	-0.03052		136.375	-0.0824		136.5	-0.07629
136.5	-0.03662		136.5	-0.07935		136.5	-0.0885
136.594	-0.04883		136.562	-0.06714		136.625	-0.10071
136.688	-0.04883		136.688	-0.04883		136.75	-0.0824
136.797	-0.05493		136.75	-0.04272		136.875	-0.07019
136.891	-0.06104		136.875	-0.04883		137	-0.05798
137	-0.07019		137	-0.04272		137	-0.04272
137.094	-0.04578		137.062	-0.06104		137.125	-0.03967
137.188	-0.05188		137.188	-0.06714		137.25	-0.05188
137.297	-0.05493		137.25	-0.07629		137.375	-0.06714
137.391	-0.05798		137.375	-0.07935		137.5	-0.06714
137.5	-0.07324		137.5	-0.0824		137.5	-0.0824
137.594	-0.05493		137.562	-0.0824		137.625	-0.06104
137.688	-0.04883		137.688	-0.05493		137.75	-0.07324
137.797	-0.02136		137.75	-0.05493		137.875	-0.06104
137.891	-0.03357		137.875	-0.07019		138	-0.07019
138	-0.03052		138	-0.07629		138	-0.07019
138.094	-0.04272		138.062	-0.07629		138.125	-0.06714
138.188	-0.02747		138.188	-0.07019		138.25	-0.07019
138.297	-0.04578		138.25	-0.07324		138.375	-0.05188
138.391	-0.04272		138.375	-0.06714		138.5	-0.04578
138.5	-0.05188		138.5	-0.06714		138.5	-0.03967
138.594	-0.05493		138.562	-0.05798		138.625	-0.04272
138.688	-0.04883		138.688	-0.05188		138.75	-0.04272
138.797	-0.04272		138.75	-0.03967		138.875	-0.03662
138.891	-0.02441		138.875	-0.03662		139	-0.04578
139	-0.02136		139	-0.06104		139	-0.04578
139.094	0.00305		139.062	-0.05798		139.125	-0.03357
139.188	-0.00305		139.188	-0.06714		139.25	-0.03662
139.297	-0.01831		139.25	-0.07324		139.375	-0.05493
139.391	-0.02747		139.375	-0.06409		139.5	-0.03967
139.5	-0.04272		139.5	-0.06409		139.5	-0.03357
139.594	-0.03052		139.562	-0.06104		139.625	-0.01831
139.688	-0.03357		139.688	-0.06714		139.75	-0.02441
139.797	-0.02747		139.75	-0.05798		139.875	-0.03052
139.891	-0.03662		139.875	-0.05798		140	-0.06409
140	-0.03967		140	-0.05493		140	-0.06104
140.094	-0.04272		140.062	-0.05188		140.125	-0.05188
140.188	-0.03357		140.188	-0.05188		140.25	-0.03967
140.297	-0.04272		140.25	-0.04272		140.375	-0.02747
140.391	-0.04883		140.375	-0.05493		140.5	-0.02747
140.5	-0.04883		140.5	-0.04578		140.5	-0.03052
140.594	-0.04578		140.562	-0.06104		140.625	-0.05188
140.688	-0.05493		140.688	-0.06104		140.75	-0.07019
140.797	-0.07019		140.75	-0.07629		140.875	-0.06104
140.891	-0.0824		140.875	-0.07629		141	-0.05188
141	-0.0885		141	-0.06104		141	-0.04883
141.094	-0.0824		141.062	-0.04272		141.125	-0.05798
141.188	-0.09155		141.188	-0.03357		141.25	-0.0885
141.297	-0.07629		141.25	-0.03662		141.375	-0.10376
141.391	-0.07324		141.375	-0.05188		141.5	-0.09155
141.5	-0.06409		141.5	-0.06104		141.5	-0.09766
141.594	-0.04883		141.562	-0.06409		141.625	-0.06714
141.688	-0.06409		141.688	-0.05493		141.75	-0.05798
141.797	-0.07019		141.75	-0.03967		141.875	-0.05798
141.891	-0.07935		141.875	-0.04272		142	-0.05188
142	-0.07629		142	-0.05188		142	-0.03662
142.094	-0.0885		142.062	-0.05493		142.125	-0.04272
142.188	-0.08545		142.188	-0.07019		142.25	-0.06104
142.297	-0.06409		142.25	-0.06104		142.375	-0.06409
142.391	-0.06714		142.375	-0.07324		142.5	-0.06409
142.5	-0.05493		142.5	-0.05493		142.5	-0.04578
142.594	-0.05798		142.562	-0.05493		142.625	-0.04272
142.688	-0.07629		142.688	-0.05493		142.75	-0.04578
142.797	-0.07629		142.75	-0.04272		142.875	-0.05188
142.891	-0.07935		142.875	-0.05493		143	-0.05493
143	-0.07629		143	-0.04578		143	-0.06714
143.094	-0.06104		143.062	-0.03662		143.125	-0.06714
143.188	-0.07324		143.188	-0.04272		143.25	-0.05188
143.297	-0.06714		143.25	-0.05188		143.375	-0.05798
143.391	-0.08545		143.375	-0.07019		143.5	-0.06104
143.5	-0.08545		143.5	-0.07629		143.5	-0.06409
143.594	-0.07019		143.562	-0.05798		143.625	-0.04272
143.688	-0.07019		143.688	-0.04883		143.75	-0.04578
143.797	-0.06409		143.75	-0.04272		143.875	-0.03662
143.891	-0.07324		143.875	-0.01831		144	-0.03052
144	-0.07935		144	-0.04578		144	-0.03357
144.094	-0.07629		144.062	-0.03662		144.125	-0.01831
144.188	-0.07629		144.188	-0.05188		144.25	-0.05188
144.297	-0.07935		144.25	-0.04272		144.375	-0.05798
144.391	-0.06409		144.375	-0.04272		144.5	-0.07935
144.5	-0.05798		144.5	-0.04272		144.5	-0.06714
144.594	-0.04578		144.562	-0.04578		144.625	-0.0824
144.688	-0.02441		144.688	-0.05188		144.75	-0.05798
144.797	-0.03967		144.75	-0.03967		144.875	-0.05493
144.891	-0.02747		144.875	-0.05798		145	-0.07935
145	-0.02747		145	-0.03967		145	-0.06714
145.094	-0.02136		145.062	-0.05493		145.125	-0.07935
145.188	-0.02441		145.188	-0.05493		145.25	-0.07629
145.297	-0.03357		145.25	-0.06714		145.375	-0.09155
145.391	-0.03662		145.375	-0.05798		145.5	-0.06104
145.5	-0.03967		145.5	-0.05493		145.5	-0.07019
145.594	-0.04578		145.562	-0.04578		145.625	-0.05188
145.688	-0.06409		145.688	-0.05493		145.75	-0.04883
145.797	-0.06714		145.75	-0.07629		145.875	-0.03967
145.891	-0.07019		145.875	-0.07324		146	-0.02747
146	-0.07629		146	-0.07019		146	-0.03662
146.094	-0.10071		146.062	-0.05798		146.125	-0.03662
146.188	-0.10681		146.188	-0.05798		146.25	-0.05188
146.297	-0.0946		146.25	-0.04578		146.375	-0.02441
146.391	-0.07935		146.375	-0.04578		146.5	-0.03662
146.5	-0.0824		146.5	-0.04883		146.5	-0.02136
146.594	-0.0946		146.562	-0.04578		146.625	-0.01831
146.688	-0.0885		146.688	-0.06104		146.75	-0.03662
146.797	-0.0885		146.75	-0.05493		146.875	-0.04883
146.891	-0.06714		146.875	-0.04578		147	-0.08545
147	-0.06104		147	-0.03357		147	-0.06714
147.094	-0.05798		147.062	-0.04578		147.125	-0.05493
147.188	-0.04883		147.188	-0.01831		147.25	-0.03052
147.297	-0.04272		147.25	-0.01526		147.375	-0.03967
147.391	-0.06409		147.375	0.00916		147.5	-0.01831
147.5	-0.07629		147.5	0.00305		147.5	-0.00916
147.594	-0.07019		147.562	-0.00916		147.625	0.00916
147.688	-0.07629		147.688	-0.02136		147.75	0.0885
147.797	-0.07019		147.75	-0.05798		147.875	0.18005
147.891	-0.08545		147.875	-0.04578		148	0.28687
148	-0.07629		148	-0.03967		148	0.37231
148.094	-0.0824		148.062	-0.03052		148.125	0.46997
148.188	-0.0885		148.188	-0.03662		148.25	0.6073
148.297	-0.10376		148.25	-0.03357		148.375	0.80872
148.391	-0.0946		148.375	-0.05798		148.5	1.02539
148.5	-0.0946		148.5	-0.06409		148.5	1.14441
148.594	-0.09155		148.562	-0.07019		148.625	1.11389
148.688	-0.0885		148.688	-0.10681		148.75	0.97046
148.797	-0.06714		148.75	-0.0946		148.875	0.74768
148.891	-0.07935		148.875	-0.07935		149	0.54016
149	-0.10681		149	-0.05798		149	0.31738
149.094	-0.0946		149.062	-0.06104		149.125	0.13123
149.188	-0.08545		149.188	-0.07629		149.25	-0.01526
149.297	-0.07324		149.25	-0.0885		149.375	-0.14038
149.391	-0.05493		149.375	-0.09155		149.5	-0.22278
149.5	-0.07324		149.5	-0.09766		149.5	-0.30823
149.594	-0.07629		149.562	-0.10986		149.625	-0.36621
149.688	-0.10376		149.688	-0.10376		149.75	-0.39673
149.797	-0.0824		149.75	-0.11292		149.875	-0.41199
149.891	-0.07629		149.875	-0.10071		150	-0.42725
150	-0.06409		150	-0.10986		150	-0.44861
150.094	-0.06409		150.062	-0.10376		150.125	-0.48218
150.188	-0.07935		150.188	-0.10681		150.25	-0.5188
150.297	-0.06409		150.25	-0.10681		150.375	-0.52795
150.391	-0.07019		150.375	-0.11292		150.5	-0.52185
150.5	-0.06714		150.5	-0.11597		150.5	-0.51575
150.594	-0.0824		150.562	-0.10681		150.625	-0.49133
150.688	-0.07935		150.688	-0.0885		150.75	-0.49438
150.797	-0.07324		150.75	-0.06714		150.875	-0.48828
150.891	-0.07324		150.875	-0.07629		151	-0.50659
151	-0.05493		151	-0.07324		151	-0.50354
151.094	-0.05493		151.062	-0.10376		151.125	-0.50354
151.188	-0.03967		151.188	-0.10986		151.25	-0.48218
151.297	-0.04272		151.25	-0.0885		151.375	-0.44556
151.391	-0.05798		151.375	-0.07935		151.5	-0.42725
151.5	-0.07324		151.5	-0.05798		151.5	-0.41809
151.594	-0.07629		151.562	-0.06409		151.625	-0.40588
151.688	-0.05188		151.688	-0.06714		151.75	-0.40283
151.797	-0.06104		151.75	-0.0824		151.875	-0.39673
151.891	-0.05798		151.875	-0.0824		152	-0.36926
152	-0.04883		152	-0.06104		152	-0.354
152.094	-0.04272		152.062	-0.06104		152.125	-0.31433
152.188	-0.04272		152.188	-0.06714		152.25	-0.32043
152.297	-0.06104		152.25	-0.06104		152.375	-0.31128
152.391	-0.07324		152.375	-0.05493		152.5	-0.28381
152.5	-0.07629		152.5	-0.05188		152.5	-0.28381
152.594	-0.0824		152.562	-0.04883		152.625	-0.25635
152.688	-0.06104		152.688	-0.04578		152.75	-0.24109
152.797	-0.04272		152.75	-0.05188		152.875	-0.23193
152.891	-0.05188		152.875	-0.05493		153	-0.20142
153	-0.03357		153	-0.03662		153	-0.18005
153.094	-0.05798		153.062	-0.05188		153.125	-0.16785
153.188	-0.06409		153.188	-0.0824		153.25	-0.12817
153.297	-0.06409		153.25	-0.07629		153.375	-0.11902
153.391	-0.05188		153.375	-0.0885		153.5	-0.10376
153.5	-0.03052		153.5	-0.06104		153.5	-0.08545
153.594	-0.01526		153.562	-0.06104		153.625	-0.07629
153.688	-0.01831		153.688	-0.06104		153.75	-0.07629
153.797	-0.03357		153.75	-0.07019		153.875	-0.06409
153.891	-0.04578		153.875	-0.07935		154	-0.06104
154	-0.05188		154	-0.0885		154	-0.04883
154.094	-0.06104		154.062	-0.07935		154.125	-0.03052
154.188	-0.07324		154.188	-0.06104		154.25	-0.03052
154.297	-0.05798		154.25	-0.05188		154.375	-0.00916
154.391	-0.05798		154.375	-0.04883		154.5	0.02136
154.5	-0.05188		154.5	-0.04272		154.5	0.01526
154.594	-0.05493		154.562	-0.04883		154.625	0.04272
154.688	-0.05798		154.688	-0.05798		154.75	0.03052
154.797	-0.07019		154.75	-0.06104		154.875	0.01526
154.891	-0.07935		154.875	-0.06409		155	-0.0061
155	-0.07324		155	-0.06104		155	-0.00305
155.094	-0.06104		155.062	-0.05493		155.125	-0.00916
155.188	-0.05798		155.188	-0.04578		155.25	-0.0061
155.297	-0.05493		155.25	-0.04883		155.375	-0.00916
155.391	-0.03662		155.375	-0.04578		155.5	-0.0061
155.5	-0.03357		155.5	-0.06409		155.5	-0.00916
155.594	-0.04272		155.562	-0.06409		155.625	0
155.688	-0.05493		155.688	-0.04578		155.75	-0.00305
155.797	-0.04883		155.75	-0.05188		155.875	-0.01526
155.891	-0.03967		155.875	-0.06104		156	-0.02136
156	-0.06104		156	-0.06104		156	-0.02441
156.094	-0.04578		156.062	-0.06714		156.125	-0.03967
156.188	-0.05188		156.188	-0.06714		156.25	-0.03662
156.297	-0.06104		156.25	-0.07324		156.375	-0.05493
156.391	-0.07019		156.375	-0.0824		156.5	-0.05188
156.5	-0.07629		156.5	-0.0885		156.5	-0.07019
156.594	-0.05493		156.562	-0.0824		156.625	-0.07629
156.688	-0.06409		156.688	-0.0885		156.75	-0.0824
156.797	-0.04883		156.75	-0.0885		156.875	-0.05493
156.891	-0.07019		156.875	-0.07935		157	-0.05798
157	-0.05493		157	-0.0824		157	-0.06409
157.094	-0.07629		157.062	-0.05493		157.125	-0.05188
157.188	-0.06714		157.188	-0.06409		157.25	-0.06714
157.297	-0.06104		157.25	-0.07935		157.375	-0.06409
157.391	-0.05188		157.375	-0.07629		157.5	-0.04578
157.5	-0.05798		157.5	-0.0885		157.5	-0.06409
157.594	-0.03357		157.562	-0.07629		157.625	-0.05188
157.688	-0.01526		157.688	-0.05188		157.75	-0.04578
157.797	-0.03662		157.75	-0.05188		157.875	-0.05798
157.891	-0.03052		157.875	-0.07019		158	-0.06714
158	-0.04272		158	-0.07629		158	-0.07629
158.094	-0.04578		158.062	-0.0824		158.125	-0.06714
158.188	-0.04578		158.188	-0.09155		158.25	-0.05798
158.297	-0.04578		158.25	-0.0885		158.375	-0.06409
158.391	-0.03662		158.375	-0.08545		158.5	-0.05188
158.5	-0.04272		158.5	-0.07324		158.5	-0.06104
158.594	-0.02747		158.562	-0.06714		158.625	-0.07019
158.688	-0.05798		158.688	-0.06104		158.75	-0.06714
158.797	-0.03357		158.75	-0.07019		158.875	-0.04578
158.891	-0.02441		158.875	-0.08545		159	-0.03967
159	-0.00305		159	-0.07629		159	-0.04883
159.094	0.01526		159.062	-0.06714		159.125	-0.03052
159.188	0		159.188	-0.06409		159.25	-0.04883
159.297	-0.01831		159.25	-0.05798		159.375	-0.02747
159.391	-0.03662		159.375	-0.06409		159.5	-0.03967
159.5	-0.04883		159.5	-0.03967		159.5	-0.03662
159.594	-0.03967		159.562	-0.04578		159.625	-0.01526
159.688	-0.04578		159.688	-0.04883		159.75	-0.01221
159.797	-0.04272		159.75	-0.04578		159.875	-0.03052
159.891	-0.04578		159.875	-0.05188		160	-0.06409
160	-0.02441		160	-0.03357		160	-0.06409
160.094	-0.03357		160.062	-0.04578		160.125	-0.03662
160.188	-0.02747		160.188	-0.04883		160.25	-0.01526
160.297	-0.04578		160.25	-0.04883		160.375	0
160.391	-0.04883		160.375	-0.02136		160.5	0.00305
160.5	-0.03967		160.5	-0.01831		160.5	-0.03967
160.594	-0.04883		160.562	-0.03967		160.625	-0.04578
160.688	-0.07629		160.688	-0.05493		160.75	-0.05493
160.797	-0.06714		160.75	-0.07629		160.875	-0.04578
160.891	-0.07324		160.875	-0.06714		161	-0.03357
161	-0.07324		161	-0.06714		161	-0.04578
161.094	-0.08545		161.062	-0.04272		161.125	-0.04272
161.188	-0.07629		161.188	-0.01526		161.25	-0.05798
161.297	-0.06714		161.25	-0.03357		161.375	-0.07324
161.391	-0.06714		161.375	-0.06104		161.5	-0.07019
161.5	-0.06714		161.5	-0.06409		161.5	-0.06714
161.594	-0.0885		161.562	-0.07019		161.625	-0.07324
161.688	-0.06714		161.688	-0.05493		161.75	-0.06714
161.797	-0.07629		161.75	-0.03662		161.875	-0.06714
161.891	-0.07324		161.875	-0.04578		162	-0.07629
162	-0.10071		162	-0.04272		162	-0.06714
162.094	-0.10986		162.062	-0.04578		162.125	-0.07324
162.188	-0.09766		162.188	-0.04883		162.25	-0.06104
162.297	-0.0824		162.25	-0.06104		162.375	-0.05493
162.391	-0.06409		162.375	-0.04883		162.5	-0.04578
162.5	-0.07324		162.5	-0.04883		162.5	-0.03357
162.594	-0.07935		162.562	-0.04578		162.625	-0.03357
162.688	-0.08545		162.688	-0.03357		162.75	-0.04578
162.797	-0.0824		162.75	-0.05798		162.875	-0.06409
162.891	-0.08545		162.875	-0.05493		163	-0.07019
163	-0.05188		163	-0.06714		163	-0.05188
163.094	-0.04272		163.062	-0.07019		163.125	-0.06409
163.188	-0.03967		163.188	-0.07019		163.25	-0.05188
163.297	-0.06104		163.25	-0.07324		163.375	-0.05493
163.391	-0.07629		163.375	-0.07935		163.5	-0.04578
163.5	-0.07019		163.5	-0.07935		163.5	-0.04883
163.594	-0.0885		163.562	-0.07324		163.625	-0.06714
163.688	-0.07935		163.688	-0.07935		163.75	-0.06104
163.797	-0.06714		163.75	-0.09155		163.875	-0.05493
163.891	-0.07019		163.875	-0.10071		164	-0.05493
164	-0.0824		164	-0.08545		164	-0.04272
164.094	-0.09155		164.062	-0.08545		164.125	-0.05493
164.188	-0.0885		164.188	-0.07935		164.25	-0.05798
164.297	-0.07629		164.25	-0.07629		164.375	-0.06714
164.391	-0.06714		164.375	-0.06714		164.5	-0.04883
164.5	-0.06714		164.5	-0.04578		164.5	-0.06104
164.594	-0.03967		164.562	-0.06409		164.625	-0.05798
164.688	-0.05188		164.688	-0.05188		164.75	-0.06409
164.797	-0.05188		164.75	-0.07019		164.875	-0.07935
164.891	-0.05798		164.875	-0.03967		165	-0.07935
165	-0.05798		165	-0.05798		165	-0.0885
165.094	-0.05493		165.062	-0.06409		165.125	-0.07629
165.188	-0.07324		165.188	-0.05493		165.25	-0.07935
165.297	-0.05798		165.25	-0.04883		165.375	-0.05493
165.391	-0.05493		165.375	-0.05188		165.5	-0.05798
165.5	-0.05798		165.5	-0.06409		165.5	-0.04883
165.594	-0.05798		165.562	-0.05798		165.625	-0.05188
165.688	-0.05798		165.688	-0.06714		165.75	-0.05798
165.797	-0.06714		165.75	-0.05493		165.875	-0.03662
165.891	-0.07629		165.875	-0.06714		166	-0.03052
166	-0.0824		166	-0.07019		166	-0.04883
166.094	-0.07935		166.062	-0.07019		166.125	-0.04883
166.188	-0.08545		166.188	-0.05798		166.25	-0.04578
166.297	-0.0885		166.25	-0.06409		166.375	-0.06104
166.391	-0.07935		166.375	-0.05493		166.5	-0.04272
166.5	-0.10986		166.5	-0.02747		166.5	-0.03662
166.594	-0.0824		166.562	-0.02441		166.625	-0.03357
166.688	-0.0885		166.688	-0.01526		166.75	-0.01526
166.797	-0.05798		166.75	-0.02747		166.875	-0.05188
166.891	-0.07324		166.875	-0.02136		167	-0.07019
167	-0.06104		167	-0.03052		167	-0.07019
167.094	-0.06714		167.062	-0.03967		167.125	-0.04578
167.188	-0.06104		167.188	-0.03662		167.25	-0.04578
167.297	-0.05188		167.25	-0.01221		167.375	-0.03662
167.391	-0.05493		167.375	-0.02136		167.5	-0.02136
167.5	-0.04883		167.5	-0.03052		167.5	-0.02441
167.594	-0.04883		167.562	-0.01221		167.625	-0.01526
167.688	-0.07019		167.688	-0.02441		167.75	-0.03967
167.797	-0.05188		167.75	-0.03052		167.875	-0.04272
167.891	-0.04578		167.875	-0.03662		168	-0.05188
168	-0.04883		168	-0.01526		168	-0.05188
168.094	-0.07629		168.062	-0.01221		168.125	-0.04883
168.188	-0.07629		168.188	-0.02136		168.25	-0.05798
168.297	-0.07935		168.25	-0.02747		168.375	-0.06714
168.391	-0.07019		168.375	-0.05493		168.5	-0.0824
168.5	-0.08545		168.5	-0.05493		168.5	-0.08545
168.594	-0.07324		168.562	-0.07019		168.625	-0.0885
168.688	-0.07935		168.688	-0.04272		168.75	-0.07629
168.797	-0.06714		168.75	-0.03052		168.875	-0.06714
168.891	-0.10681		168.875	-0.03662		169	-0.07629
169	-0.09155		169	-0.05188		169	-0.08545
169.094	-0.11292		169.062	-0.07019		169.125	-0.06409
169.188	-0.0946		169.188	-0.06714		169.25	-0.05798
169.297	-0.07935		169.25	-0.08545		169.375	-0.07019
169.391	-0.07629		169.375	-0.0824		169.5	-0.07629
169.5	-0.06409		169.5	-0.07629		169.5	-0.0946
169.594	-0.05798		169.562	-0.07935		169.625	-0.10071
169.688	-0.07629		169.688	-0.07629		169.75	-0.10071
169.797	-0.07935		169.75	-0.08545		169.875	-0.07324
169.891	-0.08545		169.875	-0.0946		170	-0.07324
170	-0.07324		170	-0.09155		170	-0.06409
170.094	-0.08545		170.062	-0.09155		170.125	-0.07629
170.188	-0.07019		170.188	-0.09155		170.25	-0.09155
170.297	-0.0824		170.25	-0.09155		170.375	-0.08545
170.391	-0.06714		170.375	-0.10071		170.5	-0.09155
170.5	-0.08545		170.5	-0.09155		170.5	-0.07324
170.594	-0.07019		170.562	-0.10681		170.625	-0.07019
170.688	-0.06104		170.688	-0.0824		170.75	-0.07629
170.797	-0.05188		170.75	-0.06409		170.875	-0.07629
170.891	-0.04578		170.875	-0.05493		171	-0.07935
171	-0.04578		171	-0.07324		171	-0.07629
171.094	-0.02747		171.062	-0.0946		171.125	-0.06714
171.188	-0.03662		171.188	-0.10071		171.25	-0.06714
171.297	-0.04578		171.25	-0.10071		171.375	-0.07629
171.391	-0.04272		171.375	-0.07629		171.5	-0.06104
171.5	-0.05188		171.5	-0.06714		171.5	-0.07629
171.594	-0.03967		171.562	-0.06714		171.625	-0.06714
171.688	-0.04883		171.688	-0.05493		171.75	-0.06409
171.797	-0.04883		171.75	-0.07019		171.875	-0.07019
171.891	-0.05798		171.875	-0.07019		172	-0.07019
172	-0.05798		172	-0.05798		172	-0.07019
172.094	-0.06409		172.062	-0.05798		172.125	-0.06104
172.188	-0.05798		172.188	-0.05188		172.25	-0.06409
172.297	-0.05798		172.25	-0.06409		172.375	-0.06409
172.391	-0.06104		172.375	-0.0824		172.5	-0.06714
172.5	-0.08545		172.5	-0.07324		172.5	-0.06104
172.594	-0.0824		172.562	-0.09155		172.625	-0.07324
172.688	-0.05798		172.688	-0.0824		172.75	-0.07629
172.797	-0.04578		172.75	-0.0946		172.875	-0.07629
172.891	-0.03967		172.875	-0.07629		173	-0.07629
173	-0.05188		173	-0.05798		173	-0.0824
173.094	-0.04578		173.062	-0.07629		173.125	-0.0885
173.188	-0.06104		173.188	-0.06409		173.25	-0.07019
173.297	-0.07019		173.25	-0.07935		173.375	-0.07935
173.391	-0.05493		173.375	-0.09155		173.5	-0.06104
173.5	-0.06104		173.5	-0.07935		173.5	-0.07019
173.594	-0.03662		173.562	-0.07019		173.625	-0.04578
173.688	-0.04272		173.688	-0.07629		173.75	-0.04272
173.797	-0.04883		173.75	-0.06104		173.875	-0.05188
173.891	-0.05188		173.875	-0.05188		174	-0.06409
174	-0.06104		174	-0.04272		174	-0.06714
174.094	-0.0946		174.062	-0.03967		174.125	-0.05798
174.188	-0.07935		174.188	-0.05188		174.25	-0.06409
174.297	-0.0824		174.25	-0.04272		174.375	-0.04578
174.391	-0.07935		174.375	-0.05493		174.5	-0.06409
174.5	-0.07324		174.5	-0.05493		174.5	-0.04578
174.594	-0.06104		174.562	-0.06714		174.625	-0.04578
174.688	-0.05493		174.688	-0.05188		174.75	-0.04883
174.797	-0.05798		174.75	-0.07324		174.875	-0.05493
174.891	-0.05798		174.875	-0.07935		175	-0.05493
175	-0.05188		175	-0.06409		175	-0.05188
175.094	-0.06104		175.062	-0.06104		175.125	-0.07019
175.188	-0.06409		175.188	-0.05493		175.25	-0.06104
175.297	-0.05188		175.25	-0.06409		175.375	-0.07935
175.391	-0.04578		175.375	-0.04883		175.5	-0.06714
175.5	-0.05188		175.5	-0.02747		175.5	-0.06409
175.594	-0.04272		175.562	-0.02747		175.625	-0.05798
175.688	-0.03662		175.688	-0.02747		175.75	-0.05493
175.797	-0.01526		175.75	-0.03662		175.875	-0.06409
175.891	-0.01221		175.875	-0.03052		176	-0.0824
176	-0.00305		176	-0.06409		176	-0.0946
176.094	-0.02441		176.062	-0.07324		176.125	-0.06104
176.188	-0.03357		176.188	-0.07629		176.25	-0.07019
176.297	-0.05188		176.25	-0.07629		176.375	-0.04578
176.391	-0.04272		176.375	-0.09155		176.5	-0.06409
176.5	-0.04272		176.5	-0.07629		176.5	-0.0885
176.594	-0.03662		176.562	-0.07019		176.625	-0.07629
176.688	-0.05188		176.688	-0.05188		176.75	-0.07019
176.797	-0.07019		176.75	-0.06104		176.875	-0.05493
176.891	-0.07629		176.875	-0.07019		177	-0.05798
177	-0.06714		177	-0.07324		177	-0.04883
177.094	-0.07324		177.062	-0.06409		177.125	-0.07324
177.188	-0.07935		177.188	-0.05798		177.25	-0.09155
177.297	-0.08545		177.25	-0.07935		177.375	-0.0946
177.391	-0.07019		177.375	-0.0946		177.5	-0.0946
177.5	-0.07629		177.5	-0.10071		177.5	-0.07935
177.594	-0.04578		177.562	-0.11902		177.625	-0.07935
177.688	-0.06714		177.688	-0.12207		177.75	-0.07019
177.797	-0.03662		177.75	-0.10986		177.875	-0.07935
177.891	-0.06409		177.875	-0.09766		178	-0.07324
178	-0.04578		178	-0.10986		178	-0.08545
178.094	-0.03967		178.062	-0.09766		178.125	-0.06714
178.188	-0.03662		178.188	-0.09155		178.25	-0.05798
178.297	-0.03967		178.25	-0.07629		178.375	-0.05493
178.391	-0.02747		178.375	-0.08545		178.5	-0.04883
178.5	-0.02136		178.5	-0.07935		178.5	-0.04272
178.594	-0.04272		178.562	-0.08545		178.625	-0.05188
178.688	-0.03662		178.688	-0.0824		178.75	-0.05188
178.797	-0.03357		178.75	-0.05493		178.875	-0.04883
178.891	-0.03052		178.875	-0.07019		179	-0.05798
179	-0.00916		179	-0.06409		179	-0.05493
179.094	-0.0061		179.062	-0.06104		179.125	-0.05798
179.188	-0.00916		179.188	-0.05493		179.25	-0.05493
179.297	-0.04272		179.25	-0.03967		179.375	-0.05493
179.391	-0.04578		179.375	-0.04578		179.5	-0.05493
179.5	-0.07935		179.5	-0.03967		179.5	-0.03967
179.594	-0.06714		179.562	-0.06104		179.625	-0.04272
179.688	-0.06104		179.688	-0.05493		179.75	-0.03662
179.797	-0.04883		179.75	-0.06104		179.875	-0.06714
179.891	-0.04272		179.875	-0.04883		180	-0.06409
180	-0.05188		180	-0.05493		180	-0.0824
180.094	-0.06409		180.062	-0.04578		180.125	-0.07629
180.188	-0.07019		180.188	-0.02747		180.25	-0.06104
180.297	-0.07935		180.25	-0.03052		180.375	-0.06409
180.391	-0.07324		180.375	-0.03357		180.5	-0.05798
180.5	-0.07324		180.5	-0.03357		180.5	-0.04578
180.594	-0.05798		180.562	-0.03052		180.625	-0.04578
180.688	-0.06714		180.688	-0.02747		180.75	-0.03967
180.797	-0.07629		180.75	-0.04578		180.875	-0.03357
180.891	-0.0824		180.875	-0.04883		181	-0.04272
181	-0.07629		181	-0.03357		181	-0.04272
181.094	-0.06409		181.062	-0.03052		181.125	-0.07324
181.188	-0.06714		181.188	-0.02747		181.25	-0.06104
181.297	-0.07629		181.25	-0.04578		181.375	-0.05188
181.391	-0.06714		181.375	-0.05798		181.5	-0.06714
181.5	-0.07935		181.5	-0.04272		181.5	-0.05798
181.594	-0.06409		181.562	-0.05798		181.625	-0.06104
181.688	-0.07629		181.688	-0.05188		181.75	-0.06714
181.797	-0.06714		181.75	-0.06104		181.875	-0.07324
181.891	-0.06409		181.875	-0.04578		182	-0.05798
182	-0.09155		182	-0.02747		182	-0.05188
182.094	-0.09155		182.062	-0.04883		182.125	-0.06104
182.188	-0.0885		182.188	-0.07019		182.25	-0.07629
182.297	-0.07019		182.25	-0.07935		182.375	-0.07935
182.391	-0.05798		182.375	-0.07629		182.5	-0.09766
182.5	-0.04272		182.5	-0.06714		182.5	-0.10376
182.594	-0.04272		182.562	-0.05188		182.625	-0.10681
182.688	-0.07019		182.688	-0.06409		182.75	-0.09766
182.797	-0.09766		182.75	-0.06409		182.875	-0.07019
182.891	-0.09766		182.875	-0.07019		183	-0.04578
183	-0.0824		183	-0.06714		183	-0.03662
183.094	-0.06714		183.062	-0.07935		183.125	-0.03662
183.188	-0.07935		183.188	-0.05493		183.25	-0.03967
183.297	-0.10681		183.25	-0.03967		183.375	-0.06714
183.391	-0.08545		183.375	-0.05798		183.5	-0.06409
183.5	-0.0885		183.5	-0.04272		183.5	-0.04578
183.594	-0.07629		183.562	-0.05188		183.625	-0.06104
183.688	-0.06409		183.688	-0.04578		183.75	-0.04272
183.797	-0.06104		183.75	-0.05493		183.875	-0.03662
183.891	-0.04272		183.875	-0.05798		184	-0.05493
184	-0.07324		184	-0.06409		184	-0.04883
184.094	-0.06104		184.062	-0.05798		184.125	-0.04272
184.188	-0.04272		184.188	-0.06104		184.25	-0.05798
184.297	-0.03662		184.25	-0.06714		184.375	-0.06714
184.391	-0.04578		184.375	-0.06714		184.5	-0.04883
184.5	-0.05188		184.5	-0.07629		184.5	-0.04883
184.594	-0.06714		184.562	-0.06409		184.625	-0.03967
184.688	-0.08545		184.688	-0.06714		184.75	-0.02747
184.797	-0.0946		184.75	-0.06409		184.875	-0.05188
184.891	-0.08545		184.875	-0.06714		185	-0.05188
185	-0.07629		185	-0.06714		185	-0.06104
185.094	-0.07019		185.062	-0.07019		185.125	-0.06104
185.188	-0.04883		185.188	-0.06104		185.25	-0.06409
185.297	-0.06409		185.25	-0.06409		185.375	-0.06409
185.391	-0.05188		185.375	-0.06409		185.5	-0.06104
185.5	-0.05798		185.5	-0.05493		185.5	-0.04272
185.594	-0.06714		185.562	-0.05493		185.625	-0.03662
185.688	-0.07019		185.688	-0.05188		185.75	-0.04272
185.797	-0.05798		185.75	-0.04883		185.875	-0.05188
185.891	-0.06714		185.875	-0.05493		186	-0.06104
186	-0.06714		186	-0.04883		186	-0.04883
186.094	-0.07935		186.062	-0.03357		186.125	-0.04883
186.188	-0.07324		186.188	-0.03052		186.25	-0.03052
186.297	-0.06409		186.25	-0.03967		186.375	-0.04578
186.391	-0.07629		186.375	-0.05188		186.5	-0.02441
186.5	-0.07935		186.5	-0.04578		186.5	-0.00305
186.594	-0.05493		186.562	-0.04272		186.625	-0.01526
186.688	-0.06714		186.688	-0.03967		186.75	-0.02747
186.797	-0.07324		186.75	-0.04578		186.875	-0.02441
186.891	-0.0824		186.875	-0.05493		187	-0.03357
187	-0.07324		187	-0.03357		187	-0.05188
187.094	-0.0885		187.062	-0.04272		187.125	-0.03967
187.188	-0.06714		187.188	-0.06104		187.25	-0.04272
187.297	-0.06409		187.25	-0.03967		187.375	-0.03357
187.391	-0.05493		187.375	-0.03662		187.5	-0.03662
187.5	-0.05798		187.5	-0.04272		187.5	-0.04272
187.594	-0.05493		187.562	-0.03662		187.625	-0.05798
187.688	-0.07935		187.688	-0.03052		187.75	-0.05493
187.797	-0.08545		187.75	-0.02747		187.875	-0.06714
187.891	-0.08545		187.875	-0.01831		188	-0.05493
188	-0.0824		188	-0.03357		188	-0.06409
188.094	-0.07324		188.062	-0.02441		188.125	-0.06409
188.188	-0.06714		188.188	-0.02136		188.25	-0.06409
188.297	-0.06104		188.25	-0.02441		188.375	-0.07935
188.391	-0.04578		188.375	-0.03052		188.5	-0.06104
188.5	-0.05493		188.5	-0.04272		188.5	-0.07324
188.594	-0.06104		188.562	-0.03967		188.625	-0.07629
188.688	-0.04578		188.688	-0.05188		188.75	-0.0824
188.797	-0.06409		188.75	-0.05188		188.875	-0.08545
188.891	-0.10681		188.875	-0.06714		189	-0.0946
189	-0.09766		189	-0.09155		189	-0.10071
189.094	-0.10681		189.062	-0.0885		189.125	-0.0946
189.188	-0.09766		189.188	-0.0946		189.25	-0.08545
189.297	-0.09766		189.25	-0.07629		189.375	-0.07935
189.391	-0.09155		189.375	-0.0885		189.5	-0.09766
189.5	-0.09766		189.5	-0.06104		189.5	-0.10071
189.594	-0.07935		189.562	-0.07629		189.625	-0.09766
189.688	-0.0885		189.688	-0.0885		189.75	-0.0946
189.797	-0.07629		189.75	-0.0946		189.875	-0.0885
189.891	-0.06104		189.875	-0.0946		190	-0.06409
190	-0.07324		190	-0.09155		190	-0.06409
190.094	-0.07935		190.062	-0.10681		190.125	-0.07324
190.188	-0.07935		190.188	-0.10986		190.25	-0.07324
190.297	-0.07019		190.25	-0.10986		190.375	-0.0824
190.391	-0.07324		190.375	-0.10986		190.5	-0.06409
190.5	-0.09766		190.5	-0.10681		190.5	-0.07324
190.594	-0.07324		190.562	-0.10681		190.625	-0.05493
190.688	-0.07629		190.688	-0.0824		190.75	-0.04883
190.797	-0.05188		190.75	-0.06714		190.875	-0.05798
190.891	-0.06714		190.875	-0.07629		191	-0.04883
191	-0.03662		191	-0.08545		191	-0.06104
191.094	-0.05798		191.062	-0.0946		191.125	-0.07324
191.188	-0.05798		191.188	-0.09766		191.25	-0.07629
191.297	-0.06104		191.25	-0.09155		191.375	-0.07629
191.391	-0.08545		191.375	-0.08545		191.5	-0.08545
191.5	-0.07935		191.5	-0.07629		191.5	-0.07019
191.594	-0.06409		191.562	-0.0824		191.625	-0.05493
191.688	-0.06714		191.688	-0.07324		191.75	-0.04578
191.797	-0.06714		191.75	-0.07324		191.875	-0.07324
191.891	-0.06409		191.875	-0.09155		192	-0.06714
192	-0.07019		192	-0.07935		192	-0.07019
192.094	-0.07019		192.062	-0.0885		192.125	-0.08545
192.188	-0.05493		192.188	-0.07019		192.25	-0.07324
192.297	-0.06714		192.25	-0.05493		192.375	-0.0824
192.391	-0.07629		192.375	-0.05188		192.5	-0.07935
192.5	-0.06409		192.5	-0.05493		192.5	-0.05493
192.594	-0.05798		192.562	-0.05188		192.625	-0.05798
192.688	-0.05493		192.688	-0.04883		192.75	-0.05493
192.797	-0.03967		192.75	-0.05188		192.875	-0.06104
192.891	-0.04578		192.875	-0.05493		193	-0.05493
193	-0.04272		193	-0.07324		193	-0.05493
193.094	-0.05493		193.062	-0.06714		193.125	-0.03967
193.188	-0.07019		193.188	-0.06104		193.25	-0.04883
193.297	-0.07935		193.25	-0.05188		193.375	-0.05188
193.391	-0.07935		193.375	-0.05798		193.5	-0.06104
193.5	-0.07324		193.5	-0.05798		193.5	-0.06714
193.594	-0.07324		193.562	-0.05798		193.625	-0.06714
193.688	-0.07019		193.688	-0.06714		193.75	-0.06409
193.797	-0.06104		193.75	-0.04883		193.875	-0.0824
193.891	-0.06714		193.875	-0.05798		194	-0.07629
194	-0.06409		194	-0.04883		194	-0.06104
194.094	-0.03662		194.062	-0.03967		194.125	-0.07629
194.188	-0.03967		194.188	-0.03662		194.25	-0.06104
194.297	-0.04578		194.25	-0.02441		194.375	-0.06409
194.391	-0.04272		194.375	-0.03357		194.5	-0.05493
194.5	-0.04272		194.5	-0.03662		194.5	-0.06409
194.594	-0.02747		194.562	-0.03967		194.625	-0.06104
194.688	-0.05798		194.688	-0.05188		194.75	-0.05493
194.797	-0.05188		194.75	-0.06714		194.875	-0.05188
194.891	-0.05798		194.875	-0.07629		195	-0.04883
195	-0.05798		195	-0.0824		195	-0.06104
195.094	-0.06104		195.062	-0.07935		195.125	-0.06104
195.188	-0.06409		195.188	-0.0824		195.25	-0.07629
195.297	-0.07019		195.25	-0.08545		195.375	-0.07629
195.391	-0.05493		195.375	-0.07935		195.5	-0.08545
195.5	-0.05188		195.5	-0.07629		195.5	-0.0824
195.594	-0.03662		195.562	-0.05493		195.625	-0.07629
195.688	-0.03662		195.688	-0.06104		195.75	-0.07324
195.797	-0.05188		195.75	-0.06409		195.875	-0.07324
195.891	-0.04578		195.875	-0.07324		196	-0.07019
196	-0.03662		196	-0.07935		196	-0.05188
196.094	-0.02136		196.062	-0.07019		196.125	-0.05188
196.188	-0.01526		196.188	-0.07935		196.25	-0.06409
196.297	-0.02136		196.25	-0.06409		196.375	-0.08545
196.391	-0.02136		196.375	-0.06409		196.5	-0.07324
196.5	-0.04883		196.5	-0.06104		196.5	-0.0885
196.594	-0.03052		196.562	-0.06714		196.625	-0.09766
196.688	-0.05188		196.688	-0.05188		196.75	-0.07324
196.797	-0.02441		196.75	-0.07935		196.875	-0.07935
196.891	-0.04272		196.875	-0.06714		197	-0.06409
197	-0.05493		197	-0.07019		197	-0.07935
197.094	-0.06104		197.062	-0.0885		197.125	-0.07629
197.188	-0.04883		197.188	-0.0885		197.25	-0.0885
197.297	-0.03967		197.25	-0.09766		197.375	-0.07629
197.391	-0.04883		197.375	-0.12512		197.5	-0.06714
197.5	-0.04883		197.5	-0.10071		197.5	-0.07324
197.594	-0.04578		197.562	-0.0946		197.625	-0.06104
197.688	-0.04272		197.688	-0.07629		197.75	-0.07324
197.797	-0.04578		197.75	-0.07324		197.875	-0.06409
197.891	-0.04272		197.875	-0.07629		198	-0.05798
198	-0.04272		198	-0.09766		198	-0.03967
198.094	-0.05188		198.062	-0.10681		198.125	-0.03662
198.188	-0.04578		198.188	-0.10986		198.25	-0.06104
198.297	-0.06104		198.25	-0.09766		198.375	-0.04578
198.391	-0.03662		198.375	-0.07019		198.5	-0.05188
198.5	-0.06409		198.5	-0.07935		198.5	-0.05798
198.594	-0.05798		198.562	-0.0885		198.625	-0.05493
198.688	-0.06104		198.688	-0.09155		198.75	-0.05493
198.797	-0.03662		198.75	-0.0885		198.875	-0.06714
198.891	-0.03357		198.875	-0.07935		199	-0.05188
199	0.00305		199	-0.07324		199	-0.04272
199.094	-0.00916		199.062	-0.05188		199.125	-0.02441
199.188	-0.02441		199.188	-0.04883		199.25	-0.02441
199.297	-0.03967		199.25	-0.04272		199.375	-0.01526
199.391	-0.05798		199.375	-0.04272		199.5	-0.03052
199.5	-0.05493		199.5	-0.04272		199.5	-0.03357
199.594	-0.05188		199.562	-0.03967		199.625	-0.03967
199.688	-0.07324		199.688	-0.03662		199.75	-0.04272
[truncated: 48,003 more rows]

## Sheet: Figure 1 B iii
ACSF	0Ca2+	ACSF
1.56	1.89	1.44
0.55	0.79	0.48
1.07	1.36	1
1.01	1.37	0.8
2.33	2.83	2.77
2.85	2.75	3.61
2.73	3.02	2.69
2.28	2.64	2.59
3.08	3.44	3.17
0.63	0.75	0.88
2.79	3.35	2.94
1.26	1.39	1.39
0.78	1.08	1
2.42	2.63	2.1
2.22	2.64	1.77
1.54	1.94	0.86
1.03	1.33	0.92
1.04	1.21	0.86
2.3	3.01	1.48
0.94	1.11	1.07
1.08	1.2	1.07
0.95	1.07	0.95
3.04	4.16	2.09
3.07	3.43	3.09
1.39	1.62	1.16
1.14	1.32	1.07
1.14	2.63	2.35
2.36	3.74	3.44
1.78	2.58	1.92
2.69	4.25	3.69
1.79	2.08	2.56
1.67	3	2.32
