# Supplementary material for: The cation channel mechanisms of subthreshold inward depolarizing currents in the mice VTA dopaminergic neurons and their roles in the chronic-stress-induced depression-like behavior
Source: eLife. 2024 Dec 6;12:RP88319. doi: 10.7554/eLife.88319 (PMC11623934; doi:10.7554/eLife.88319)
Supplement: Figure 1—source data 5. [file elife-88319-fig1-data5.xlsx]

## Sheet: Figure 1Ci
		Time-course
		Time (min)	RMP (mV)
		0	-50.5914
		0.9	-50.6083
		1.8	-50.6015
		2.7	-50.7236
		3.6	-50.7846
		4.5	-50.649
		5.4	-50.6117
		6.3	-50.5642
		7.2	-50.6219
		8.1	-50.6083
		9	-50.632
		9.9	-50.6015
		10.8	-50.5947
		11.7	-50.632
		12.6	-50.5676
		13.5	-50.5371
		14.4	-50.5846
		15.3	-50.6287
		16.2	-50.6524
		17.1	-50.6151
		18	-50.6287
		18.9	-50.5914
		19.8	-50.6727
		20.7	-50.6354
		21.6	-50.5947
		22.5	-50.6354
		23.4	-50.6626
		24.3	-50.6422
		25.2	-50.5914
		26.1	-50.5439
		27	-50.5778
		27.9	-50.6151
		28.8	-50.6185
		29.7	-50.5981
		30.6	-50.5846
		31.5	-50.5473
		32.4	-50.5541
		33.3	-50.4998
		34.2	-50.5303
		35.1	-50.6354
		36	-50.7033
		36.9	-50.7406
		37.8	-50.6219
		38.7	-50.6151
		39.6	-50.5846
		40.5	-50.5744
		41.4	-50.5642
		42.3	-50.6219
		43.2	-50.6592
		44.1	-50.6185
		45	-50.5473
		45.9	-50.5303
		46.8	-50.5744
		47.7	-50.5981
		48.6	-50.6253
		49.5	-50.6083
		50.4	-50.5914
		51.3	-50.5947
		52.2	-50.5575
		53.1	-50.588
		54	-50.5744
		54.9	-50.5812
		55.8	-50.632
		56.7	-50.6456
		57.6	-50.6049
		58.5	-50.6083
		59.4	-50.6151
		60.3	-50.6558
		61.2	-50.6354
		62.1	-50.6795
		63	-50.6829
		63.9	-50.6456
		64.8	-50.6185
		65.7	-50.5608
		66.6	-50.5608
		67.5	-50.5541
		68.4	-50.5812
		69.3	-50.6388
		70.2	-50.6388
		71.1	-50.5778
		72	-50.5235
		72.9	-50.51
		73.8	-50.4693
		74.7	-50.5642
		75.6	-50.588
		76.5	-50.5914
		77.4	-50.6049
		78.3	-50.5676
		79.2	-50.5405
		80.1	-50.5676
		81	-50.5642
		81.9	-50.6083
		82.8	-50.6422
		83.7	-50.6592
		84.6	-50.6117
		85.5	-50.571
		86.4	-50.6422
		87.3	-50.632
		88.2	-50.6083
		89.1	-50.6083
		90	-50.5744
		90.9	-50.571
		91.8	-50.5168
		92.7	-50.4964
		93.6	-50.4795
		94.5	-50.5303
		95.4	-50.5914
		96.3	-50.6219
		97.2	-50.6117
		98.1	-50.588
		99	-50.5914
		99.9	-50.588
		100.8	-50.588
		101.7	-50.6558
		102.6	-50.6829
		103.5	-50.7507
		104.4	-50.6626
		105.3	-50.588
		106.2	-50.5846
		107.1	-50.5608
		108	-50.632
		108.9	-50.632
		109.8	-50.5947
		110.7	-50.5981
		111.6	-50.5405
		112.5	-50.5541
		113.4	-50.4998
		114.3	-50.5371
		115.2	-50.6117
		116.1	-50.6592
		117	-50.6592
		117.9	-50.6151
		118.8	-50.6117
		119.7	-50.6558
		120.6	-50.6727
		121.5	-50.6727
		122.4	-50.6897
		123.3	-50.7033
		124.2	-50.6592
		125.1	-50.5744
		126	-50.5337
		126.9	-50.5507
		127.8	-50.5846
		128.7	-50.6015
		129.6	-50.588
		130.5	-50.6422
		131.4	-50.5575
		132.3	-50.5473
		133.2	-50.5337
		134.1	-50.5371
		135	-50.6253
		135.9	-50.6931
		136.8	-50.7745
		137.7	-50.649
		138.6	-50.5914
		139.5	-50.6049
		140.4	-50.5778
		141.3	-50.6354
		142.2	-50.6524
		143.1	-50.6795
		144	-50.6524
		144.9	-50.5981
		145.8	-50.5642
		146.7	-50.5778
		147.6	-50.6117
		148.5	-50.6524
		149.4	-50.6524
		150.3	-50.6388
		151.2	-50.5947
		152.1	-50.5744
		153	-50.5744
		153.9	-50.5947
		154.8	-50.6049
		155.7	-50.6422
		156.6	-50.6694
		157.5	-50.6354
		158.4	-50.6151
		159.3	-50.6354
		160.2	-50.6117
		161.1	-50.6354
		162	-50.6694
		162.9	-50.6694
		163.8	-50.6795
		164.7	-50.5812
		165.6	-50.5439
		166.5	-50.5134
		167.4	-50.5812
		168.3	-50.5947
		169.2	-50.6287
		170.1	-50.6829
		171	-50.5744
		171.9	-50.5303
		172.8	-50.5202
		173.7	-50.51
		174.6	-50.5541
		175.5	-50.6524
		176.4	-50.6219
		177.3	-50.6015
		178.2	-50.588
		179.1	-50.588
		180	-50.6049
		180.9	-50.6049
		181.8	-50.6253
		182.7	-50.6626
		183.6	-50.6592
		184.5	-50.5744
		185.4	-50.5337
		186.3	-50.5507
		187.2	-50.6185
		188.1	-50.5914
		189	-50.5778
		189.9	-50.588
		190.8	-50.5541
		191.7	-50.5812
		192.6	-50.5303
		193.5	-50.4829
		194.4	-50.5473
		195.3	-50.6083
		196.2	-50.6151
		197.1	-50.6388
		198	-50.5981
		198.9	-50.6083
		199.8	-50.6151
		200.7	-50.6287
		201.6	-50.649
		202.5	-50.6965
		203.4	-50.8016
		204.3	-50.7473
		205.2	-50.6219
		206.1	-50.5947
		207	-50.5947
		207.9	-50.6083
		208.8	-50.6422
		209.7	-50.6388
		210.6	-50.6083
		211.5	-50.5981
		212.4	-50.5744
		213.3	-50.4998
		214.2	-50.5507
		215.1	-50.6117
		216	-50.6524
		216.9	-50.6626
		217.8	-50.6117
		218.7	-50.6219
		219.6	-50.6524
		220.5	-50.6965
		221.4	-50.588
		222.3	-50.6388
		223.2	-50.6761
		224.1	-50.6795
		225	-50.6049
		225.9	-50.5642
		226.8	-50.5947
		227.7	-50.5676
		228.6	-50.6049
		229.5	-50.6117
		230.4	-50.571
		231.3	-50.6253
		232.2	-50.5575
		233.1	-50.4998
		234	-50.4998
		234.9	-50.5608
		235.8	-50.6219
		236.7	-50.6694
		237.6	-50.5846
		238.5	-50.5134
		239.4	-50.5235
		240.3	-50.5337
		241.2	-50.5032
		242.1	-50.5439
		243	-50.5744
		243.9	-50.6219
		244.8	-50.5642
		245.7	-50.4964
		246.6	-50.4829
		247.5	-50.5202
		248.4	-50.5235
		249.3	-50.5507
		250.2	-50.5202
		251.1	-50.5235
		252	-50.5032
		252.9	-50.4998
		253.8	-50.5168
		254.7	-50.4896
		255.6	-50.571
		256.5	-50.571
		257.4	-50.5439
		258.3	-50.5541
		259.2	-50.5168
		260.1	-50.5507
		261	-50.5473
		261.9	-50.5914
		262.8	-50.6219
		263.7	-50.632
		264.6	-50.5812
		265.5	-50.5337
		266.4	-50.4998
		267.3	-50.5168
		268.2	-50.5507
		269.1	-50.5575
		270	-50.6354
		270.9	-50.588
		271.8	-50.4998
		272.7	-50.4829
		273.6	-50.4184
		274.5	-50.449
		275.4	-50.5235
		276.3	-50.5439
		277.2	-50.51
		278.1	-50.5168
		279	-50.4862
		279.9	-50.4862
		280.8	-50.5202
		281.7	-50.5473
		282.6	-50.588
		283.5	-50.6117
		284.4	-50.5507
		285.3	-50.4964
		286.2	-50.5439
		287.1	-50.5812
		288	-50.5066
		288.9	-50.5303
		289.8	-50.5032
		290.7	-50.5066
		291.6	-50.4557
		292.5	-50.4422
		293.4	-50.4252
		294.3	-50.432
		295.2	-50.5168
		296.1	-50.5303
		297	-50.5202
		297.9	-50.5066
		298.8	-50.4862
		299.7	-50.5134
		300.6	-50.5235
		301.5	-50.5812
		302.4	-50.6083
		303.3	-50.7067
		304.2	-50.6558
		305.1	-50.5405
		306	-50.5235
		306.9	-50.5269
		307.8	-50.5134
		308.7	-50.5473
		309.6	-50.5541
		310.5	-50.571
		311.4	-50.4795
		312.3	-50.4761
		313.2	-50.4456
		314.1	-50.4422
		315	-50.4964
		315.9	-50.5914
		316.8	-50.5914
		317.7	-50.5439
		318.6	-50.5337
		319.5	-50.5778
		320.4	-50.5914
		321.3	-50.5608
		322.2	-50.5744
		323.1	-50.5676
		324	-50.571
		324.9	-50.5371
		325.8	-50.4896
		326.7	-50.4964
		327.6	-50.5032
		328.5	-50.5168
		329.4	-50.5202
		330.3	-50.5405
		331.2	-50.4862
		332.1	-50.4727
		333	-50.4083
		333.9	-50.4286
		334.8	-50.4761
		335.7	-50.5608
		336.6	-50.649
		337.5	-50.571
		338.4	-50.493
		339.3	-50.4998
		340.2	-50.4829
		341.1	-50.5337
		342	-50.5676
		342.9	-50.6049
		343.8	-50.5981
		344.7	-50.5405
		345.6	-50.4625
		346.5	-50.4422
		347.4	-50.493
		348.3	-50.5269
		349.2	-50.5405
		350.1	-50.5202
		351	-50.4998
		351.9	-50.4862
		352.8	-50.5032
		353.7	-50.5439
		354.6	-50.5303
		355.5	-50.6015
		356.4	-50.6117
		357.3	-50.5812
		358.2	-50.5371
		359.1	-50.5269
		360	-50.5541
		360.9	-50.5642
		361.8	-50.6015
		362.7	-50.6185
		363.6	-50.6524
		364.5	-50.6083
		365.4	-50.5507
		366.3	-50.5032
		367.2	-50.51
		368.1	-50.5507
		369	-50.5405
		369.9	-50.6083
		370.8	-50.588
		371.7	-50.4964
		372.6	-50.4829
		373.5	-50.4422
		374.4	-50.4659
		375.3	-50.5473
		376.2	-50.571
		377.1	-50.5676
		378	-50.5575
		378.9	-50.5608
		379.8	-50.5642
		380.7	-50.5981
		381.6	-50.5778
		382.5	-50.6015
		383.4	-50.6456
		384.3	-50.588
		385.2	-50.5439
		386.1	-50.5439
		387	-50.6185
		387.9	-50.571
		388.8	-50.5846
		389.7	-50.5846
		390.6	-50.5439
		391.5	-50.5778
		392.4	-50.5507
		393.3	-50.5134
		394.2	-50.5168
		395.1	-50.5947
		396	-50.632
		396.9	-50.649
		397.8	-50.6117
		398.7	-50.5981
		399.6	-50.6049
		400.5	-50.6083
		401.4	-50.6219
		402.3	-50.6354
		403.2	-50.7033
		404.1	-50.7168
		405	-50.6117
		405.9	-50.5439
		406.8	-50.5439
		407.7	-50.5303
		408.6	-50.5846
		409.5	-50.5778
		410.4	-50.571
		411.3	-50.5439
		412.2	-50.5303
		413.1	-50.4829
		414	-50.5066
		414.9	-50.5744
		415.8	-50.6422
		416.7	-50.632
		417.6	-50.6083
		418.5	-50.6015
		419.4	-50.6185
		420.3	-50.649
		421.2	-50.6049
		422.1	-50.6015
		423	-50.6626
		423.9	-50.6388
		424.8	-50.6219
		425.7	-50.5541
		426.6	-50.5405
		427.5	-50.571
		428.4	-50.5947
		429.3	-50.5981
		430.2	-50.6117
		431.1	-50.5778
		432	-50.5914
		432.9	-50.51
		433.8	-50.4998
		434.7	-50.5473
		435.6	-50.6253
		436.5	-50.7033
		437.4	-50.6727
		438.3	-50.571
		439.2	-50.5778
		440.1	-50.5507
		441	-50.5981
		441.9	-50.5846
		442.8	-50.6253
		443.7	-50.6287
		444.6	-50.6151
		445.5	-50.5608
		446.4	-50.5134
		447.3	-50.5405
		448.2	-50.5473
		449.1	-50.5744
		450	-50.571
		450.9	-50.5337
		451.8	-50.5507
		452.7	-50.4727
		453.6	-50.5473
		454.5	-50.5269
		455.4	-50.5608
		456.3	-50.6185
		457.2	-50.5676
		458.1	-50.5608
		459	-50.5575
		459.9	-50.5642
		460.8	-50.5981
		461.7	-50.5914
		462.6	-50.6219
		463.5	-50.6388
		464.4	-50.6253
		465.3	-50.5507
		466.2	-50.51
		467.1	-50.5507
		468	-50.5744
		468.9	-50.588
		469.8	-50.632
		470.7	-50.6117
		471.6	-50.5473
		472.5	-50.5235
		473.4	-50.4693
		474.3	-50.4693
		475.2	-50.5405
		476.1	-50.6049
		477	-50.6015
		477.9	-50.5812
		478.8	-50.5676
		479.7	-50.5541
		480.6	-50.5914
		481.5	-50.5914
		482.4	-50.6151
		483.3	-50.6626
		484.2	-50.6558
		485.1	-50.6151
		486	-50.5812
		486.9	-50.6558
		487.8	-50.5947
		488.7	-50.5744
		489.6	-50.588
		490.5	-50.5541
		491.4	-50.5846
		492.3	-50.5235
		493.2	-50.4659
		494.1	-50.493
		495	-50.5642
		495.9	-50.6151
		496.8	-50.6287
		497.7	-50.5981
		498.6	-50.6287
		499.5	-50.5744
		500.4	-50.6015
		501.3	-50.6049
		502.2	-50.6456
		503.1	-50.7202
		504	-50.727
		504.9	-50.5947
		505.8	-50.5473
		506.7	-50.5439
		507.6	-50.5473
		508.5	-50.5947
		509.4	-50.5744
		510.3	-50.5439
		511.2	-50.5744
		512.1	-50.5642
		513	-50.5202
		513.9	-50.5032
		514.8	-50.5575
		515.7	-50.6117
		516.6	-50.6388
		517.5	-50.6185
		518.4	-50.588
		519.3	-50.588
		520.2	-50.6829
		521.1	-50.632
		522	-50.6117
		522.9	-50.6422
		523.8	-50.6388
		524.7	-50.6117
		525.6	-50.5541
		526.5	-50.5269
		527.4	-50.5608
		528.3	-50.5914
		529.2	-50.6253
		530.1	-50.5914
		531	-50.5676
		531.9	-50.5439
		532.8	-50.5371
		533.7	-50.5269
		534.6	-50.5507
		535.5	-50.6219
		536.4	-50.6999
		537.3	-50.71
		538.2	-50.571
		539.1	-50.5744
		540	-50.5744
		540.9	-50.6151
		541.8	-50.666
		542.7	-50.6592
		543.6	-50.6965
		544.5	-50.6727
		545.4	-50.6117
		546.3	-50.571
		547.2	-50.5812
		548.1	-50.6117
		549	-50.6287
		549.9	-50.6354
		550.8	-50.6287
		551.7	-50.5812
		552.6	-50.6117
		553.5	-50.6354
		554.4	-50.6388
		555.3	-50.6524
		556.2	-50.6931
		557.1	-50.6795
		558	-50.6253
		558.9	-50.6049
		559.8	-50.6287
		560.7	-50.6117
		561.6	-50.6897
		562.5	-50.666
		563.4	-50.6727
		564.3	-50.632
		565.2	-50.5947
		566.1	-50.5405
		567	-50.571
		567.9	-50.6015
		568.8	-50.6015
		569.7	-50.6287
		570.6	-50.6965
		571.5	-50.5371
		572.4	-50.5405
		573.3	-50.4998
		574.2	-50.5168
		575.1	-50.5744
		576	-50.6151
		576.9	-50.6253
		577.8	-50.5608
		578.7	-50.5405
		579.6	-50.5676
		580.5	-50.571
		581.4	-50.5914
		582.3	-50.6287
		583.2	-50.6524
		584.1	-50.666
		585	-50.6049
		585.9	-50.5914
		586.8	-50.6253
		587.7	-50.6015
		588.6	-50.5914
		589.5	-50.5642
		590.4	-50.5744
		591.3	-50.5439
		592.2	-50.5134
		593.1	-50.4761
		594	-50.4896
		594.9	-50.5676
		595.8	-50.6083
		596.7	-50.6083
		597.6	-50.6083
		598.5	-50.5812
		599.4	-50.5744
		600.3	-50.5676
		601.2	-50.5608
		602.1	-50.5812
		603	-50.6694
		603.9	-50.7202
		604.8	-50.6219
		605.7	-50.5541
		606.6	-50.5405
		607.5	-50.5405
		608.4	-50.5676
		609.3	-50.588
		610.2	-50.5812
		611.1	-50.5608
		612	-50.5676
		612.9	-50.5303
		613.8	-50.4761
		614.7	-50.5235
		615.6	-50.6049
		616.5	-50.6049
		617.4	-50.5981
		618.3	-50.5778
		619.2	-50.5744
		620.1	-50.6456
		621	-50.6185
		621.9	-50.5541
		622.8	-50.6151
		623.7	-50.632
		624.6	-50.6185
		625.5	-50.5473
		626.4	-50.5371
		627.3	-50.5541
		628.2	-50.5642
		629.1	-50.5676
		630	-50.5778
		630.9	-50.5473
		631.8	-50.5642
		632.7	-50.4998
		633.6	-50.4829
		634.5	-50.5202
		635.4	-50.588
		636.3	-50.6422
		637.2	-50.6795
		638.1	-50.6185
		639	-50.571
		639.9	-50.5914
		640.8	-50.5947
		641.7	-50.5642
		642.6	-50.6083
		643.5	-50.6422
		644.4	-50.6287
		645.3	-50.5608
		646.2	-50.5032
		647.1	-50.5066
		648	-50.5371
		648.9	-50.5608
		649.8	-50.5507
		650.7	-50.5303
		651.6	-50.5235
		652.5	-50.4964
		653.4	-50.5303
		654.3	-50.5405
		655.2	-50.5405
		656.1	-50.5981
		657	-50.6253
		657.9	-50.5676
		658.8	-50.5575
		659.7	-50.5676
		660.6	-50.5744
		661.5	-50.5202
		662.4	-50.5541
		663.3	-50.5846
		664.2	-50.5914
		665.1	-50.5235
		666	-50.4896
		666.9	-50.5235
		667.8	-50.51
		668.7	-50.5473
		669.6	-50.5642
		670.5	-50.5947
		671.4	-50.4625
		672.3	-50.4422
		673.2	-50.3981
		674.1	-50.3947
		675	-50.5303
		675.9	-50.5642
		676.8	-50.5676
		677.7	-50.5608
		678.6	-50.5676
		679.5	-50.5507
		680.4	-50.571
		681.3	-50.5608
		682.2	-50.5914
		683.1	-50.6219
		684	-50.6219
		684.9	-50.5541
		685.8	-50.4829
		686.7	-50.5676
		687.6	-50.5744
		688.5	-50.5202
		689.4	-50.5202
		690.3	-50.4896
		691.2	-50.493
		692.1	-50.4659
		693	-50.4693
		693.9	-50.4354
		694.8	-50.493
		695.7	-50.5642
		696.6	-50.5439
		697.5	-50.5541
		698.4	-50.5371
		699.3	-50.5405
		700.2	-50.571
		701.1	-50.5575
		702	-50.588
		702.9	-50.6083
		703.8	-50.71
		704.7	-50.6015
		705.6	-50.5235
		706.5	-50.5168
		707.4	-50.5134
		708.3	-50.5642
		709.2	-50.5812
		710.1	-50.5778
		711	-50.6015
		711.9	-50.5202
		712.8	-50.4896
		713.7	-50.4422
		714.6	-50.493
		715.5	-50.5744
		716.4	-50.6015
		717.3	-50.6117
		718.2	-50.5575
		719.1	-50.5507
		720	-50.632
		720.9	-50.6083
		721.8	-50.632
		722.7	-50.6287
		723.6	-50.649
		724.5	-50.6117
		725.4	-50.5439
		726.3	-50.4964
		727.2	-50.51
		728.1	-50.5202
		729	-50.5202
		729.9	-50.5473
		730.8	-50.5337
		731.7	-50.4659
		732.6	-50.4795
		733.5	-50.4591
		734.4	-50.4795
		735.3	-50.5473
		736.2	-50.6083
		737.1	-50.6931
		738	-50.5642
		738.9	-50.5405
		739.8	-50.5337
		740.7	-50.5405
		741.6	-50.6015
		742.5	-50.5812
		743.4	-50.6219
		744.3	-50.6219
		745.2	-50.5337
		746.1	-50.4795
		747	-50.4693
		747.9	-50.5371
		748.8	-50.5405
		749.7	-50.5439
		750.6	-50.5608
		751.5	-50.5202
		752.4	-50.5337
		753.3	-50.571
		754.2	-50.6049
		755.1	-50.5914
		756	-50.632
		756.9	-50.6626
		757.8	-50.5914
		758.7	-50.5947
		759.6	-50.5541
		760.5	-50.5608
		761.4	-50.6049
		762.3	-50.6049
		763.2	-50.6354
		764.1	-50.6185
		765	-50.588
		765.9	-50.5337
		766.8	-50.5405
		767.7	-50.5914
		768.6	-50.6049
		769.5	-50.6388
		770.4	-50.6795
		771.3	-50.5473
		772.2	-50.5371
		773.1	-50.4761
		774	-50.4659
		774.9	-50.51
		775.8	-50.5676
		776.7	-50.6049
		777.6	-50.5812
		778.5	-50.5066
		779.4	-50.5405
		780.3	-50.5507
		781.2	-50.5608
		782.1	-50.5981
		783	-50.6151
		783.9	-50.6592
		784.8	-50.6049
		785.7	-50.5541
		786.6	-50.5778
		787.5	-50.6185
		788.4	-50.5846
		789.3	-50.5676
		790.2	-50.5608
		791.1	-50.5066
		792	-50.5337
		792.9	-50.4896
		793.8	-50.4591
		794.7	-50.493
		795.6	-50.588
		796.5	-50.5812
		797.4	-50.5812
		798.3	-50.5439
		799.2	-50.5473
		800.1	-50.5269
		801	-50.5642
		801.9	-50.5168
		802.8	-50.6253
		803.7	-50.7067
		804.6	-50.6287
		805.5	-50.5439
		806.4	-50.5202
		807.3	-50.5134
		808.2	-50.5439
		809.1	-50.5473
		810	-50.5303
		810.9	-50.4964
		811.8	-50.5642
		812.7	-50.493
		813.6	-50.4591
		814.5	-50.4829
		815.4	-50.5608
		816.3	-50.5981
		817.2	-50.5642
		818.1	-50.5371
		819	-50.5337
		819.9	-50.571
		820.8	-50.6388
		821.7	-50.493
		822.6	-50.5405
		823.5	-50.5981
		824.4	-50.5744
		825.3	-50.5168
		826.2	-50.4727
		827.1	-50.4761
		828	-50.5134
		828.9	-50.5676
		829.8	-50.5575
		830.7	-50.5473
		831.6	-50.5405
		832.5	-50.5202
		833.4	-50.4693
		834.3	-50.493
		835.2	-50.5744
		836.1	-50.6117
		837	-50.6965
		837.9	-50.5575
		838.8	-50.5066
		839.7	-50.5066
		840.6	-50.5066
		841.5	-50.5846
		842.4	-50.5575
		843.3	-50.6015
		844.2	-50.6083
		845.1	-50.5235
		846	-50.4829
		846.9	-50.51
		847.8	-50.5439
		848.7	-50.588
		849.6	-50.5846
		850.5	-50.5947
		851.4	-50.5439
		852.3	-50.5541
		853.2	-50.5337
		854.1	-50.5608
		855	-50.5235
		855.9	-50.5846
		856.8	-50.571
		857.7	-50.5371
		858.6	-50.5235
		859.5	-50.5337
		860.4	-50.5202
		861.3	-50.5405
		862.2	-50.5032
		863.1	-50.588
		864	-50.6117
		864.9	-50.5473
		865.8	-50.5202
		866.7	-50.4591
		867.6	-50.5168
		868.5	-50.51
		869.4	-50.5608
		870.3	-50.6354
		871.2	-50.571
		872.1	-50.5066
		873	-50.4829
		873.9	-50.4286
		874.8	-50.4727
		875.7	-50.5676
		876.6	-50.5812
		877.5	-50.571
		878.4	-50.5608
		879.3	-50.5507
		880.2	-50.5405
		881.1	-50.5202
		882	-50.571
		882.9	-50.5981
		883.8	-50.6422
		884.7	-50.5744
		885.6	-50.5303
		886.5	-50.5778
		887.4	-50.632
		888.3	-50.6049
		889.2	-50.5947
		890.1	-50.5744
		891	-50.5812
		891.9	-50.51
		892.8	-50.4896
		893.7	-50.493
		894.6	-50.5337
		895.5	-50.6015
		896.4	-50.6253
		897.3	-50.6456
		898.2	-50.5778
		899.1	-50.5642
		900	-50.588
		900.9	-50.5473
		901.8	-50.6219
		902.7	-50.6151
		903.6	-50.7134
		904.5	-50.666
		905.4	-50.5337
		906.3	-50.5032
		907.2	-50.5303
		908.1	-50.5507
		909	-50.5371
		909.9	-50.5541
		910.8	-50.5947
		911.7	-50.5337
		912.6	-50.5168
		913.5	-50.4591
		914.4	-50.4625
		915.3	-50.5303
		916.2	-50.5608
		917.1	-50.5812
		918	-50.5575
		918.9	-50.5439
		919.8	-50.5676
		920.7	-50.6151
		921.6	-50.6049
		922.5	-50.5981
		923.4	-50.6388
		924.3	-50.6422
		925.2	-50.5812
		926.1	-50.5371
		927	-50.5541
		927.9	-50.5778
		928.8	-50.5846
		929.7	-50.5914
		930.6	-50.5676
		931.5	-50.5337
		932.4	-50.5032
		933.3	-50.449
		934.2	-50.4557
		935.1	-50.5066
		936	-50.5744
		936.9	-50.666
		937.8	-50.588
		938.7	-50.4964
		939.6	-50.493
		940.5	-50.4795
		941.4	-50.4998
		942.3	-50.5405
		943.2	-50.5981
		944.1	-50.6185
		945	-50.5507
		945.9	-50.5032
		946.8	-50.4557
		947.7	-50.51
		948.6	-50.5405
		949.5	-50.5541
		950.4	-50.5778
		951.3	-50.5473
		952.2	-50.5168
		953.1	-50.5405
		954	-50.5812
		954.9	-50.5642
		955.8	-50.6185
		956.7	-50.632
		957.6	-50.5778
		958.5	-50.5303
		959.4	-50.5473
		960.3	-50.5676
		961.2	-50.5642
		962.1	-50.588
		963	-50.5981
		963.9	-50.6354
		964.8	-50.5914
		965.7	-50.5202
		966.6	-50.4998
		967.5	-50.5507
		968.4	-50.5676
		969.3	-50.5541
		970.2	-50.6524
		971.1	-50.5914
		972	-50.5507
		972.9	-50.5168
		973.8	-50.4761
		974.7	-50.4896
		975.6	-50.5642
		976.5	-50.5914
		977.4	-50.5812
		978.3	-50.5744
		979.2	-50.5541
		980.1	-50.5744
		981	-50.5981
		981.9	-50.5846
		982.8	-50.6219
		983.7	-50.632
		984.6	-50.6185
		985.5	-50.5575
		986.4	-50.5541
		987.3	-50.6287
		988.2	-50.5778
		989.1	-50.5642
		990	-50.5914
		990.9	-50.5405
		991.8	-50.5473
		992.7	-50.5066
		993.6	-50.4693
		994.5	-50.5134
		995.4	-50.5608
		996.3	-50.6287
		997.2	-50.6253
		998.1	-50.6151
		999	-50.5981
		999.9	-50.5914
		1000.8	-50.6151
		1001.7	-50.6253
		1002.6	-50.6253
		1003.5	-50.7473
		1004.4	-50.727
		1005.3	-50.6185
		1006.2	-50.5507
		1007.1	-50.5947
		1008	-50.5744
		1008.9	-50.6083
		1009.8	-50.6049
		1010.7	-50.5981
		1011.6	-50.5575
		1012.5	-50.5744
		1013.4	-50.5134
		1014.3	-50.5202
		1015.2	-50.6015
		1016.1	-50.6524
		1017	-50.6422
		1017.9	-50.6287
		1018.8	-50.6015
		1019.7	-50.649
		1020.6	-50.6965
		1021.5	-50.6761
		1022.4	-50.6354
		1023.3	-50.7033
		1024.2	-50.6727
		1025.1	-50.6388
		1026	-50.5676
		1026.9	-50.5676
		1027.8	-50.588
		1028.7	-50.6083
		1029.6	-50.5914
		1030.5	-50.5914
		1031.4	-50.5507
		1032.3	-50.5642
		1033.2	-50.5235
		1034.1	-50.5032
		1035	-50.5303
		1035.9	-50.6253
		1036.8	-50.6931
		1037.7	-50.7067
		1038.6	-50.5676
		1039.5	-50.571
		1040.4	-50.5575
		1041.3	-50.5914
		1042.2	-50.5947
		1043.1	-50.632
		1044	-50.6456
		1044.9	-50.6253
		1045.8	-50.5473
		1046.7	-50.5202
		1047.6	-50.5608
		1048.5	-50.5744
		1049.4	-50.6015
		1050.3	-50.6083
		1051.2	-50.5778
		1052.1	-50.6083
		1053	-50.5371
		1053.9	-50.5778
		1054.8	-50.5676
		1055.7	-50.6083
		1056.6	-50.6524
		1057.5	-50.6083
		1058.4	-50.5778
		1059.3	-50.5642
		1060.2	-50.5642
		1061.1	-50.6083
		1062	-50.5371
		1062.9	-50.6287
		1063.8	-50.6354
		1064.7	-50.6049
		1065.6	-50.5439
		1066.5	-50.5202
		1067.4	-50.5575
		1068.3	-50.5676
		1069.2	-50.5981
		1070.1	-50.6388
		1071	-50.6117
		1071.9	-50.5778
		1072.8	-50.5269
		1073.7	-50.4998
		1074.6	-50.5168
		1075.5	-50.6117
		1076.4	-50.6592
		1077.3	-50.649
		1078.2	-50.6015
		1079.1	-50.588
		1080	-50.5812
		1080.9	-50.6083
		1081.8	-50.5676
		1082.7	-50.6185
		1083.6	-50.6219
		1084.5	-50.5947
		1085.4	-50.5405
		1086.3	-50.4896
		1087.2	-50.5947
		1088.1	-50.5608
		1089	-50.5541
		1089.9	-50.5405
		1090.8	-50.5303
		1091.7	-50.5642
		1092.6	-50.5337
		1093.5	-50.493
		1094.4	-50.5202
		1095.3	-50.571
		1096.2	-50.632
		1097.1	-50.6422
		1098	-50.6083
		1098.9	-50.6083
		1099.8	-50.6151
		1100.7	-50.6151
		1101.6	-50.6049
		1102.5	-50.6015
		1103.4	-50.7033
		1104.3	-50.7507
		1105.2	-50.6185
		1106.1	-50.5337
		1107	-50.5202
		1107.9	-50.5642
		1108.8	-50.588
		1109.7	-50.6015
		1110.6	-50.5846
		1111.5	-50.6015
		1112.4	-50.5846
		1113.3	-50.5337
		1114.2	-50.5337
		1115.1	-50.5608
		1116	-50.6287
		1116.9	-50.5914
		1117.8	-50.5439
		1118.7	-50.4184
		1119.6	-50.4184
		1120.5	-50.5202
		1121.4	-50.4761
		1122.3	-50.4761
		1123.2	-50.5303
		1124.1	-50.5371
		1125	-50.4964
		1125.9	-50.4727
		1126.8	-50.4591
		1127.7	-50.4862
		1128.6	-50.5269
		1129.5	-50.5439
		1130.4	-50.5507
		1131.3	-50.5507
		1132.2	-50.5439
		1133.1	-50.5168
		1134	-50.4896
		1134.9	-50.51
		1135.8	-50.5744
		1136.7	-50.6253
		1137.6	-50.6626
		1138.5	-50.5676
		1139.4	-50.5439
		1140.3	-50.5473
		1141.2	-50.5473
		1142.1	-50.5914
		1143	-50.6253
		1143.9	-50.6524
		1144.8	-50.6049
		1145.7	-50.5608
		1146.6	-50.5235
		1147.5	-50.5337
		1148.4	-50.5168
		1149.3	-50.5676
		1150.2	-50.5778
		1151.1	-50.5473
		1152	-50.5371
		1152.9	-50.5439
		1153.8	-50.5744
		1154.7	-50.5642
		1155.6	-50.5846
		1156.5	-50.6185
		1157.4	-50.6456
		1158.3	-50.5981
		1159.2	-50.5778
		1160.1	-50.5608
		1161	-50.6287
		1161.9	-50.6083
		1162.8	-50.6388
		1163.7	-50.666
		1164.6	-50.6253
		1165.5	-50.5676
		1166.4	-50.5269
		1167.3	-50.5507
		1168.2	-50.5473
		1169.1	-50.5744
		1170	-50.632
		1170.9	-50.6558
		1171.8	-50.5812
		1172.7	-50.5473
		1173.6	-50.4862
		1174.5	-50.51
		1175.4	-50.571
		1176.3	-50.6185
		1177.2	-50.6253
		1178.1	-50.5608
		1179	-50.5642
		1179.9	-50.5473
		1180.8	-50.5914
		1181.7	-50.571
		1182.6	-50.6015
		1183.5	-50.6592
		1184.4	-50.6727
		1185.3	-50.6015
		1186.2	-50.5914
		1187.1	-50.6287
		1188	-50.649
		1188.9	-50.6049
		1189.8	-50.6388
		1190.7	-50.6117
		1191.6	-50.632
		1192.5	-50.6151
		1193.4	-50.5676
		1194.3	-50.5507
		1195.2	-50.6015
		1196.1	-50.6592
		1197	-50.6863
		1197.9	-50.6253
		1198.8	-50.6354
		1199.7	-50.6185
		1200.6	-50.666
		1201.5	-50.6219
		1202.4	-50.6727
		1203.3	-50.7473
		1204.2	-50.8219
		1205.1	-50.6999
		1206	-50.6287
		1206.9	-50.6219
		1207.8	-50.6253
		1208.7	-50.666
		1209.6	-50.6795
		1210.5	-50.6422
		1211.4	-50.6185
		1212.3	-50.5947
		1213.2	-50.5778
		1214.1	-50.5439
		1215	-50.5981
		1215.9	-50.6795
		1216.8	-50.6863
		1217.7	-50.6592
		1218.6	-50.6354
		1219.5	-50.6151
		1220.4	-50.6829
		1221.3	-50.6558
		1222.2	-50.6524
		1223.1	-50.6761
		1224	-50.6965
		1224.9	-50.6727
		1225.8	-50.6117
		1226.7	-50.6083
		1227.6	-50.6354
		1228.5	-50.6524
		1229.4	-50.6897
		1230.3	-50.6863
		1231.2	-50.6795
		1232.1	-50.5981
		1233	-50.588
		1233.9	-50.5778
		1234.8	-50.5914
		1235.7	-50.6727
		1236.6	-50.7033
		1237.5	-50.7473
		1238.4	-50.6287
		1239.3	-50.6151
		1240.2	-50.6117
		1241.1	-50.5947
		1242	-50.649
		1242.9	-50.6388
		1243.8	-50.6388
		1244.7	-50.6388
		1245.6	-50.5642
		1246.5	-50.5371
		1247.4	-50.5202
		1248.3	-50.5303
		1249.2	-50.5744
		1250.1	-50.588
		1251	-50.5812
		1251.9	-50.5371
		1252.8	-50.5608
		1253.7	-50.5608
		1254.6	-50.5981
		1255.5	-50.6049
		1256.4	-50.632
		1257.3	-50.6185
		1258.2	-50.5541
		1259.1	-50.5642
		1260	-50.5676
		1260.9	-50.5608
		1261.8	-50.6151
		1262.7	-50.6083
		1263.6	-50.666
		1264.5	-50.6524
		1265.4	-50.6117
		1266.3	-50.5642
		1267.2	-50.5507
		1268.1	-50.588
		1269	-50.588
		1269.9	-50.6185
		1270.8	-50.6761
		1271.7	-50.5676
		1272.6	-50.5541
		1273.5	-50.4896
		1274.4	-50.493
		1275.3	-50.5473
		1276.2	-50.6117
		1277.1	-50.6219
		1278	-50.5947
		1278.9	-50.5812
		1279.8	-50.588
		1280.7	-50.6015
		1281.6	-50.6388
		1282.5	-50.632
		1283.4	-50.6626
		1284.3	-50.6829
		1285.2	-50.6185
		1286.1	-50.5744
		1287	-50.6253
		1287.9	-50.6151
		1288.8	-50.5947
		1289.7	-50.5744
		1290.6	-50.5812
		1291.5	-50.5405
		1292.4	-50.5812
		1293.3	-50.4964
		1294.2	-50.493
		1295.1	-50.5676
		1296	-50.632
		1296.9	-50.6524
		1297.8	-50.6049
		1298.7	-50.5473
		1299.6	-50.5439
		1300.5	-50.5405
		1301.4	-50.5541
		1302.3	-50.5473
		1303.2	-50.6185
		1304.1	-50.7507
		1305	-50.6388
		1305.9	-50.5337
		1306.8	-50.4998
		1307.7	-50.5235
		1308.6	-50.5473
		1309.5	-50.5405
		1310.4	-50.588
		1311.3	-50.5507
		1312.2	-50.5676
		1313.1	-50.5066
		1314	-50.4761
		1314.9	-50.5337
		1315.8	-50.588
		1316.7	-50.5947
		1317.6	-50.588
		1318.5	-50.5507
		1319.4	-50.5202
		1320.3	-50.5676
		1321.2	-50.6287
		1322.1	-50.51
		1323	-50.5947
		1323.9	-50.6015
		1324.8	-50.5575
		1325.7	-50.51
		1326.6	-50.4693
		1327.5	-50.51
		1328.4	-50.5168
		1329.3	-50.5676
		1330.2	-50.5608
		1331.1	-50.5608
		1332	-50.5473
		1332.9	-50.4896
		1333.8	-50.4354
		1334.7	-50.449
		1335.6	-50.5066
		1336.5	-50.5812
		1337.4	-50.6626
		1338.3	-50.5473
		1339.2	-50.5134
		1340.1	-50.5032
		1341	-50.493
		1341.9	-50.493
		1342.8	-50.5473
		1343.7	-50.6083
		1344.6	-50.5846
		1345.5	-50.5303
		1346.4	-50.4896
		1347.3	-50.5134
		1348.2	-50.493
		1349.1	-50.5439
		1350	-50.571
		1350.9	-50.5337
		1351.8	-50.5371
		1352.7	-50.5168
		1353.6	-50.4862
		1354.5	-50.5269
		1355.4	-50.5235
		1356.3	-50.571
		1357.2	-50.5676
		1358.1	-50.5235
		1359	-50.51
		1359.9	-50.5066
		1360.8	-50.5405
		1361.7	-50.5134
		1362.6	-50.5066
		1363.5	-50.5269
		1364.4	-50.5473
		1365.3	-50.5439
		1366.2	-50.4659
		1367.1	-50.4693
		1368	-50.4727
		1368.9	-50.5371
		1369.8	-50.5744
		1370.7	-50.6422
		1371.6	-50.5642
		1372.5	-50.5303
		1373.4	-50.449
		1374.3	-50.4523
		1375.2	-50.5168
		1376.1	-50.5981
		1377	-50.5778
		1377.9	-50.5608
		1378.8	-50.5439
		1379.7	-50.5405
		1380.6	-50.5235
		1381.5	-50.5337
		1382.4	-50.5303
		1383.3	-50.5914
		1384.2	-50.6287
		1385.1	-50.5778
		1386	-50.5168
		1386.9	-50.5235
		1387.8	-50.5981
		1388.7	-50.5405
		1389.6	-50.5473
		1390.5	-50.5575
		1391.4	-50.5134
		1392.3	-50.5541
		1393.2	-50.4795
		1394.1	-50.4422
		1395	-50.493
		1395.9	-50.5744
		1396.8	-50.6185
		1397.7	-50.5812
		1398.6	-50.5575
		1399.5	-50.5405
		1400.4	-50.5032
		1401.3	-50.5846
		1402.2	-50.5235
		1403.1	-50.5981
		1404	-50.6999
		1404.9	-50.6558
		1405.8	-50.5676
		1406.7	-50.5202
		1407.6	-50.5439
		1408.5	-50.5303
		1409.4	-50.5439
		1410.3	-50.5473
		1411.2	-50.5202
		1412.1	-50.5575
		1413	-50.5032
		1413.9	-50.4388
		1414.8	-50.4523
		1415.7	-50.5541
		1416.6	-50.5642
		1417.5	-50.5575
		1418.4	-50.5235
		1419.3	-50.5337
		1420.2	-50.5642
		1421.1	-50.6287
		1422	-50.4998
		1422.9	-50.5235
		1423.8	-50.6151
		1424.7	-50.6151
		1425.6	-50.5269
		1426.5	-50.4693
		1427.4	-50.4727
		1428.3	-50.5032
		1429.2	-50.5303
		1430.1	-50.5269
		1431	-50.5032
		1431.9	-50.5235
		1432.8	-50.5032
		1433.7	-50.4456
		1434.6	-50.4557
		1435.5	-50.5303
		1436.4	-50.5981
		1437.3	-50.6558
		1438.2	-50.5812
		1439.1	-50.5303
		1440	-50.493
		1440.9	-50.5269
		1441.8	-50.5202
		1442.7	-50.5676
		1443.6	-50.5812
		1444.5	-50.571
		1445.4	-50.5134
		1446.3	-50.4659
		1447.2	-50.4693
		1448.1	-50.4388
		1449	-50.4761
		1449.9	-50.5202
		1450.8	-50.51
		1451.7	-50.5134
		1452.6	-50.4896
		1453.5	-50.4964
		1454.4	-50.5405
		1455.3	-50.5439
		1456.2	-50.5676
		1457.1	-50.5405
		1458	-50.5541
		1458.9	-50.5371
		1459.8	-50.5235
		1460.7	-50.5507
		1461.6	-50.5303
		1462.5	-50.5676
		1463.4	-50.6049
		1464.3	-50.6219
		1465.2	-50.5507
		1466.1	-50.5066
		1467	-50.4896
		1467.9	-50.4998
		1468.8	-50.5168
		1469.7	-50.5778
		1470.6	-50.6354
		1471.5	-50.5812
		1472.4	-50.4557
		1473.3	-50.4591
		1474.2	-50.4523
		1475.1	-50.5134
		1476	-50.6151
		1476.9	-50.6354
		1477.8	-50.6083
		1478.7	-50.5744
		1479.6	-50.5473
		1480.5	-50.5676
		1481.4	-50.5575
		1482.3	-50.6422
		1483.2	-50.6253
		1484.1	-50.6083
		1485	-50.5676
		1485.9	-50.5202
		1486.8	-50.5371
		1487.7	-50.6049
		1488.6	-50.5473
		1489.5	-50.5507
		1490.4	-50.5507
		1491.3	-50.5676
		1492.2	-50.4998
		1493.1	-50.4727
		1494	-50.4727
		1494.9	-50.4998
		1495.8	-50.5812
		1496.7	-50.6117
		1497.6	-50.6219
		1498.5	-50.588
		1499.4	-50.5947
		1500.3	-50.6015
		1501.2	-50.5914
		1502.1	-50.632
		1503	-50.6694
		1503.9	-50.7846
		1504.8	-50.727
		1505.7	-50.5846
		1506.6	-50.5676
		1507.5	-50.5744
		1508.4	-50.6083
		1509.3	-50.5981
		1510.2	-50.6015
		1511.1	-50.6083
		1512	-50.5778
		1512.9	-50.5676
		1513.8	-50.5032
		1514.7	-50.493
		1515.6	-50.5744
		1516.5	-50.6185
		1517.4	-50.6117
		1518.3	-50.5744
		1519.2	-50.571
		1520.1	-50.6083
		1521	-50.6185
		1521.9	-50.5778
		1522.8	-50.5744
		1523.7	-50.6151
		1524.6	-50.5981
		1525.5	-50.5541
		1526.4	-50.5066
		1527.3	-50.4998
		1528.2	-50.5337
		1529.1	-50.5541
		1530	-50.5608
		1530.9	-50.5642
		1531.8	-50.5439
		1532.7	-50.4862
		1533.6	-50.4659
		1534.5	-50.4591
		1535.4	-50.5439
		1536.3	-50.6151
		1537.2	-50.6626
		1538.1	-50.6049
		1539	-50.5202
		1539.9	-50.5168
		1540.8	-50.4795
		1541.7	-50.5134
		1542.6	-50.5371
		1543.5	-50.588
		1544.4	-50.5947
		1545.3	-50.5541
		1546.2	-50.493
		1547.1	-50.5134
		1548	-50.5032
		1548.9	-50.5439
		1549.8	-50.5405
		1550.7	-50.5303
		1551.6	-50.51
		1552.5	-50.5134
		1553.4	-50.5066
		1554.3	-50.5269
		1555.2	-50.5235
		1556.1	-50.6015
		1557	-50.5981
		1557.9	-50.5846
		1558.8	-50.5473
		1559.7	-50.571
		1560.6	-50.5744
		1561.5	-50.5744
		1562.4	-50.5439
		1563.3	-50.6253
		1564.2	-50.6694
		1565.1	-50.6422
		1566	-50.5914
		1566.9	-50.571
		1567.8	-50.5744
		1568.7	-50.6151
		1569.6	-50.6253
		1570.5	-50.666
		1571.4	-50.6049
		1572.3	-50.5981
		1573.2	-50.493
		1574.1	-50.4727
		1575	-50.5032
		1575.9	-50.5914
		1576.8	-50.6354
		1577.7	-50.6219
		1578.6	-50.6015
		1579.5	-50.5541
		1580.4	-50.5575
		1581.3	-50.5812
		1582.2	-50.5473
		1583.1	-50.6219
		1584	-50.6354
		1584.9	-50.6388
		1585.8	-50.5846
		1586.7	-50.5575
		1587.6	-50.6354
		1588.5	-50.6253
		1589.4	-50.6015
		1590.3	-50.6083
		1591.2	-50.5744
		1592.1	-50.588
		1593	-50.5337
		1593.9	-50.4896
		1594.8	-50.5032
		1595.7	-50.5812
		1596.6	-50.6253
		1597.5	-50.6185
		1598.4	-50.588
		1599.3	-50.5778
		1600.2	-50.5439
		1601.1	-50.5541
		1602	-50.5642
		1602.9	-50.6049
		1603.8	-50.7439
		1604.7	-50.7372
		1605.6	-50.588
		1606.5	-50.5473
		1607.4	-50.5371
		1608.3	-50.5744
		1609.2	-50.6388
		1610.1	-50.6422
		1611	-50.632
		1611.9	-50.5914
		1612.8	-50.571
		1613.7	-50.5439
		1614.6	-50.4964
		1615.5	-50.5812
		1616.4	-50.6592
		1617.3	-50.6863
		1618.2	-50.6422
		1619.1	-50.6151
		1620	-50.6388
		1620.9	-50.6897
		1621.8	-50.6558
		1622.7	-50.6049
		1623.6	-50.6354
		1624.5	-50.6185
		1625.4	-50.588
		1626.3	-50.5269
		1627.2	-50.51
		1628.1	-50.5405
		1629	-50.5541
		1629.9	-50.5744
		1630.8	-50.5846
		1631.7	-50.5778
		1632.6	-50.5608
		1633.5	-50.4998
		1634.4	-50.5168
		1635.3	-50.5405
		1636.2	-50.632
		1637.1	-50.7134
		1638	-50.7202
		1638.9	-50.6694
		1639.8	-50.6388
		1640.7	-50.6558
		1641.6	-50.6558
		1642.5	-50.6388
		1643.4	-50.6761
		1644.3	-50.7236
		1645.2	-50.6558
		1646.1	-50.5981
		1647	-50.5981
		1647.9	-50.6083
		1648.8	-50.6083
		1649.7	-50.6558
		1650.6	-50.6422
		1651.5	-50.6015
		1652.4	-50.5981
		1653.3	-50.5608
		1654.2	-50.6015
		1655.1	-50.5642
		1656	-50.6151
		1656.9	-50.6388
		1657.8	-50.6117
		1658.7	-50.6151
		1659.6	-50.6083
		1660.5	-50.5676
		1661.4	-50.6049
		1662.3	-50.5846
		1663.2	-50.6761
		1664.1	-50.6999
		1665	-50.6558
		1665.9	-50.6049
		1666.8	-50.5541
		1667.7	-50.571
		1668.6	-50.5778
		1669.5	-50.6083
		1670.4	-50.6863
		1671.3	-50.649
		1672.2	-50.6151
		1673.1	-50.5371
		1674	-50.5269
		1674.9	-50.5439
		1675.8	-50.6354
		1676.7	-50.6863
		1677.6	-50.6863
		1678.5	-50.6558
		1679.4	-50.6388
		1680.3	-50.6388
		1681.2	-50.666
		1682.1	-50.632
		1683	-50.6558
		1683.9	-50.7168
		1684.8	-50.7168
		1685.7	-50.6592
		1686.6	-50.6287
		1687.5	-50.6965
		1688.4	-50.6354
		1689.3	-50.6388
		1690.2	-50.6354
		1691.1	-50.588
		1692	-50.6456
		1692.9	-50.6083
		1693.8	-50.5676
		1694.7	-50.5812
		1695.6	-50.6524
		1696.5	-50.6931
		1697.4	-50.6965
		1698.3	-50.6558
		1699.2	-50.6422
		1700.1	-50.6287
		1701	-50.6558
		1701.9	-50.6558
		1702.8	-50.6829
		1703.7	-50.7575
		1704.6	-50.8084
		1705.5	-50.6965
		1706.4	-50.6083
		1707.3	-50.5744
		1708.2	-50.6287
		1709.1	-50.666
		1710	-50.6626
		1710.9	-50.6592
		1711.8	-50.6287
		1712.7	-50.6185
		1713.6	-50.5846
		1714.5	-50.5269
		1715.4	-50.571
		1716.3	-50.6456
		1717.2	-50.6761
		1718.1	-50.632
		1719	-50.6388
		1719.9	-50.6151
		1720.8	-50.6999
		1721.7	-50.6253
		1722.6	-50.6388
		1723.5	-50.6897
		1724.4	-50.7202
		1725.3	-50.6626
		1726.2	-50.6015
		1727.1	-50.5778
		1728	-50.5914
		1728.9	-50.5981
		1729.8	-50.6219
		1730.7	-50.588
		1731.6	-50.6049
		1732.5	-50.5575
		1733.4	-50.5303
		1734.3	-50.5202
		1735.2	-50.5608
		1736.1	-50.6185
		1737	-50.7304
		1737.9	-50.7067
		1738.8	-50.6151
		1739.7	-50.5981
		1740.6	-50.5947
		1741.5	-50.6049
		1742.4	-50.6388
		1743.3	-50.6524
		1744.2	-50.6931
		1745.1	-50.6626
		1746	-50.588
		1746.9	-50.5439
		1747.8	-50.588
		1748.7	-50.6388
		1749.6	-50.6456
		1750.5	-50.6694
		1751.4	-50.6456
		1752.3	-50.6117
		1753.2	-50.6151
		1754.1	-50.6592
		1755	-50.6388
		1755.9	-50.649
		1756.8	-50.6727
		1757.7	-50.6558
		1758.6	-50.6388
		1759.5	-50.6354
		1760.4	-50.6151
		1761.3	-50.6388
		1762.2	-50.6185
		1763.1	-50.6761
		1764	-50.7168
		1764.9	-50.6727
		1765.8	-50.6253
		1766.7	-50.5676
		1767.6	-50.5914
		1768.5	-50.6117
		1769.4	-50.6219
		1770.3	-50.666
		1771.2	-50.6897
		1772.1	-50.5914
		1773	-50.5778
		1773.9	-50.5405
		1774.8	-50.5676
		1775.7	-50.588
		1776.6	-50.666
		1777.5	-50.6558
		1778.4	-50.6388
		1779.3	-50.6422
		1780.2	-50.6354
		1781.1	-50.649
		1782	-50.666
		1782.9	-50.6795
		1783.8	-50.6965
		1784.7	-50.6897
		1785.6	-50.6388
		1786.5	-50.6049
		1787.4	-50.6694
		1788.3	-50.6422
		1789.2	-50.5947
		1790.1	-50.6253
		1791	-50.5914
		1791.9	-50.5812
		1792.8	-50.6015
		1793.7	-50.5642
		1794.6	-50.5575
		1795.5	-50.6151
		1796.4	-50.6931
		1797.3	-50.7338
[truncated: 987,300+ more rows]

## Sheet: Figure 1Cii
TTX/ACSF	0Ca2+	TTX/ACSF
-51.4	-52.01	-50.11
-47.1	-39.51	-51.09
-54.3	-51.29	-57.29
-51.5	-50.47	-51.3
-46.2	-45.86	-48.4
-51.1	-52.39	-47.47
-53.7	-50.29	-50.22
-55.3	-54.19	-52.19
-51.76	-52.73	-52.89
-50.17	-49.1	-48.49
-44.65	-43	-42
-51.88	-51.27	-49.96
-48.28	-48.8	-51.23
-53.43	-51.61	-52.15
-46.54	-43.85	-45.65
-49.41	-47.67	-47.98
-54.35	-59.21	-55.54
-45.93	-45.62	-45.41
-49.56	-43.21	-45.1
-51.12	-50.63	-51.09
-50.11	-50.17	-50.23
-48	-47.42	-48.22
-52.4	-51.64	-52.49
-56.68	-55.85	-56.67
-50.6	-49.38	-51.91
