# Supplementary material for: The cation channel mechanisms of subthreshold inward depolarizing currents in the mice VTA dopaminergic neurons and their roles in the chronic-stress-induced depression-like behavior
Source: eLife. 2024 Dec 6;12:RP88319. doi: 10.7554/eLife.88319 (PMC11623934; doi:10.7554/eLife.88319)
Supplement: Figure 1—source data 6. [file elife-88319-fig1-data6.xlsx]

## Sheet: Figure 1 Di
Time-course
Time (min)	RMP (mV)
0	-48.8325
1.4	-48.9001
2.8	-48.8717
4.2	-48.7889
5.6	-48.7736
7	-48.7867
8.4	-48.7627
9.8	-48.7322
11.2	-48.6603
12.6	-48.6537
14	-48.7649
15.4	-48.7584
16.8	-48.7126
18.2	-48.7322
19.6	-48.7039
21	-48.7627
22.4	-48.8041
23.8	-48.73
25.2	-48.7409
26.6	-48.7475
28	-48.7562
29.4	-48.7518
30.8	-48.7278
32.2	-48.7017
33.6	-48.7845
35	-48.8368
36.4	-48.778
37.8	-48.7344
39.2	-48.7388
40.6	-48.7257
42	-48.7562
43.4	-48.6821
44.8	-48.6319
46.2	-48.7235
47.6	-48.6755
49	-48.6494
50.4	-48.6014
51.8	-48.5317
53.2	-48.5709
54.6	-48.6428
56	-48.6755
57.4	-48.6908
58.8	-48.7169
60.2	-48.7235
61.6	-48.7933
63	-48.7497
64.4	-48.6559
65.8	-48.6559
67.2	-48.669
68.6	-48.6145
70	-48.6189
71.4	-48.56
72.8	-48.6319
74.2	-48.7278
75.6	-48.706
77	-48.6843
78.4	-48.6734
79.8	-48.6516
81.2	-48.693
82.6	-48.6537
84	-48.5578
85.4	-48.5273
86.8	-48.5622
88.2	-48.608
89.6	-48.6101
91	-48.6232
92.4	-48.6712
93.8	-48.7824
95.2	-48.8347
96.6	-48.7954
98	-48.7649
99.4	-48.8216
100.8	-48.8543
102.2	-48.8412
103.6	-48.7257
105	-48.6821
106.4	-48.7039
107.8	-48.7191
109.2	-48.7082
110.6	-48.6777
112	-48.6363
113.4	-48.7017
114.8	-48.7627
116.2	-48.7453
117.6	-48.7584
119	-48.7802
120.4	-48.8281
121.8	-48.8783
123.2	-48.7824
124.6	-48.6755
126	-48.6537
127.4	-48.6428
128.8	-48.621
130.2	-48.6559
131.6	-48.5404
133	-48.5448
134.4	-48.6319
135.8	-48.621
137.2	-48.5992
138.6	-48.6101
140	-48.6036
141.4	-48.6363
142.8	-48.6843
144.2	-48.6101
145.6	-48.6341
147	-48.6799
148.4	-48.6559
149.8	-48.6254
151.2	-48.5753
152.6	-48.608
154	-48.7322
155.4	-48.7409
156.8	-48.7191
158.2	-48.7148
159.6	-48.7497
161	-48.8041
162.4	-48.8434
163.8	-48.7693
165.2	-48.754
166.6	-48.815
168	-48.8063
169.4	-48.802
170.8	-48.7649
172.2	-48.706
173.6	-48.7257
175	-48.7453
176.4	-48.7344
177.8	-48.7169
179.2	-48.7584
180.6	-48.8129
182	-48.8739
183.4	-48.8325
184.8	-48.7671
186.2	-48.7671
187.6	-48.7497
189	-48.7409
190.4	-48.7191
191.8	-48.6559
193.2	-48.7191
194.6	-48.815
196	-48.8129
197.4	-48.7889
198.8	-48.7671
200.2	-48.7715
201.6	-48.8238
203	-48.7802
204.4	-48.6777
205.8	-48.6625
207.2	-48.6537
208.6	-48.6625
210	-48.6167
211.4	-48.5753
212.8	-48.5905
214.2	-48.706
215.6	-48.6843
217	-48.6799
218.4	-48.6625
219.8	-48.7104
221.2	-48.7933
222.6	-48.815
224	-48.7148
225.4	-48.7148
226.8	-48.7824
228.2	-48.8107
229.6	-48.7627
231	-48.7191
232.4	-48.6625
233.8	-48.7388
235.2	-48.7715
236.6	-48.7518
238	-48.7431
239.4	-48.7824
240.8	-48.815
242.2	-48.8848
243.6	-48.7976
245	-48.7278
246.4	-48.7606
247.8	-48.7998
249.2	-48.7758
250.6	-48.7627
252	-48.7388
253.4	-48.7998
254.8	-48.8783
256.2	-48.8717
257.6	-48.8216
259	-48.8521
260.4	-48.8543
261.8	-48.9153
263.2	-48.8826
264.6	-48.7845
266	-48.8216
267.4	-48.8303
268.8	-48.8325
270.2	-48.815
271.6	-48.754
273	-48.7366
274.4	-48.8325
275.8	-48.8739
277.2	-48.8325
278.6	-48.8172
280	-48.863
281.4	-48.9066
282.8	-48.8674
284.2	-48.7649
285.6	-48.73
287	-48.7606
288.4	-48.7606
289.8	-48.754
291.2	-48.7453
292.6	-48.7627
294	-48.8783
295.4	-48.9066
296.8	-48.9197
298.2	-48.8761
299.6	-48.8608
301	-48.8913
302.4	-48.8761
303.8	-48.7649
305.2	-48.7082
306.6	-48.7017
308	-48.7235
309.4	-48.6908
310.8	-48.6407
312.2	-48.621
313.6	-48.6995
315	-48.7649
316.4	-48.7606
317.8	-48.7497
319.2	-48.73
320.6	-48.7802
322	-48.8281
323.4	-48.7889
324.8	-48.6668
326.2	-48.7017
327.6	-48.7017
329	-48.6799
330.4	-48.6494
331.8	-48.6145
333.2	-48.6734
334.6	-48.7518
336	-48.7388
337.4	-48.7278
338.8	-48.7627
340.2	-48.7933
341.6	-48.8216
343	-48.815
344.4	-48.6712
345.8	-48.6472
347.2	-48.6494
348.6	-48.6363
350	-48.6276
351.4	-48.6145
352.8	-48.5992
354.2	-48.6995
355.6	-48.6777
357	-48.6799
358.4	-48.7039
359.8	-48.7518
361.2	-48.7845
362.6	-48.7998
364	-48.7475
365.4	-48.7126
366.8	-48.73
368.2	-48.7497
369.6	-48.7169
371	-48.6755
372.4	-48.5992
373.8	-48.6952
375.2	-48.778
376.6	-48.7497
378	-48.7257
379.4	-48.754
380.8	-48.7867
382.2	-48.8368
383.6	-48.7693
385	-48.7431
386.4	-48.7649
387.8	-48.802
389.2	-48.8041
390.6	-48.7671
392	-48.7235
393.4	-48.7954
394.8	-48.8783
396.2	-48.8695
397.6	-48.8456
399	-48.839
400.4	-48.8434
401.8	-48.9022
403.2	-48.8434
404.6	-48.7409
406	-48.754
407.4	-48.7845
408.8	-48.7715
410.2	-48.7627
411.6	-48.7169
413	-48.7257
414.4	-48.8107
415.8	-48.8107
417.2	-48.8085
418.6	-48.8521
420	-48.8979
421.4	-48.9175
422.8	-48.9371
424.2	-48.8717
425.6	-48.863
427	-48.8804
428.4	-48.8783
429.8	-48.8543
431.2	-48.8238
432.6	-48.7736
434	-48.8325
435.4	-48.8259
436.8	-48.8368
438.2	-48.815
439.6	-48.8761
441	-48.9088
442.4	-48.9284
443.8	-48.8739
445.2	-48.8434
446.6	-48.8565
448	-48.8565
449.4	-48.8085
450.8	-48.7671
452.2	-48.7169
453.6	-48.7954
455	-48.8194
456.4	-48.8041
457.8	-48.8129
459.2	-48.8085
460.6	-48.8259
462	-48.8761
463.4	-48.8303
464.8	-48.7736
466.2	-48.7671
467.6	-48.8368
469	-48.8456
470.4	-48.815
471.8	-48.7736
473.2	-48.8041
474.6	-48.8717
476	-48.8521
477.4	-48.8565
478.8	-48.8804
480.2	-48.9175
481.6	-48.9328
483	-48.924
484.4	-48.8085
485.8	-48.8041
487.2	-48.7867
488.6	-48.7954
490	-48.7845
491.4	-48.7649
492.8	-48.7366
494.2	-48.8259
495.6	-48.8412
497	-48.8521
498.4	-48.8368
499.8	-48.8739
501.2	-48.9262
502.6	-48.9654
504	-48.8826
505.4	-48.8238
506.8	-48.7976
508.2	-48.8238
509.6	-48.7976
511	-48.7388
512.4	-48.7191
513.8	-48.802
515.2	-48.8412
516.6	-48.7889
518	-48.7671
519.4	-48.7911
520.8	-48.8521
522.2	-48.8848
523.6	-48.8194
525	-48.7366
526.4	-48.7627
527.8	-48.7845
529.2	-48.7693
530.6	-48.73
532	-48.6319
533.4	-48.6755
534.8	-48.7475
536.2	-48.7518
537.6	-48.7475
539	-48.7453
540.4	-48.7802
541.8	-48.8368
543.2	-48.7889
544.6	-48.7082
546	-48.7322
547.4	-48.778
548.8	-48.7322
550.2	-48.7191
551.6	-48.6777
553	-48.6712
554.4	-48.7409
555.8	-48.7758
557.2	-48.7278
558.6	-48.706
560	-48.754
561.4	-48.802
562.8	-48.8063
564.2	-48.7191
565.6	-48.6952
567	-48.7082
568.4	-48.7278
569.8	-48.6734
571.2	-48.6363
572.6	-48.5992
574	-48.7126
575.4	-48.7736
576.8	-48.7606
578.2	-48.7824
579.6	-48.7911
581	-48.8259
582.4	-48.8543
583.8	-48.7497
585.2	-48.7017
586.6	-48.7409
588	-48.7715
589.4	-48.7409
590.8	-48.7257
592.2	-48.6668
593.6	-48.7431
595	-48.8303
596.4	-48.8085
597.8	-48.815
599.2	-48.8521
600.6	-48.8761
602	-48.9371
603.4	-48.8804
604.8	-48.7802
606.2	-48.7758
607.6	-48.7715
609	-48.7933
610.4	-48.7802
611.8	-48.7169
613.2	-48.7169
614.6	-48.8325
616	-48.8281
617.4	-48.802
618.8	-48.7889
620.2	-48.8085
621.6	-48.8783
623	-48.8761
624.4	-48.7475
625.8	-48.7518
627.2	-48.7758
628.6	-48.7802
630	-48.7758
631.4	-48.7191
632.8	-48.7169
634.2	-48.815
635.6	-48.8063
637	-48.7889
638.4	-48.73
639.8	-48.7824
641.2	-48.8107
642.6	-48.8739
644	-48.8041
645.4	-48.7584
646.8	-48.7802
648.2	-48.7802
649.6	-48.7409
651	-48.7518
652.4	-48.6864
653.8	-48.7584
655.2	-48.8281
656.6	-48.8325
658	-48.8434
659.4	-48.8521
660.8	-48.8739
662.2	-48.9415
663.6	-48.8804
665	-48.7911
666.4	-48.7998
667.8	-48.8085
669.2	-48.7802
670.6	-48.7845
672	-48.7257
673.4	-48.7627
674.8	-48.8761
676.2	-48.8608
677.6	-48.7976
679	-48.7911
680.4	-48.8325
681.8	-48.9044
683.2	-48.9044
684.6	-48.8368
686	-48.8325
687.4	-48.8695
688.8	-48.8892
690.2	-48.8499
691.6	-48.7671
693	-48.7562
694.4	-48.8368
695.8	-48.8477
697.2	-48.8259
698.6	-48.8259
700	-48.8499
701.4	-48.9088
702.8	-48.9328
704.2	-48.8783
705.6	-48.8586
707	-48.9022
708.4	-48.8957
709.8	-48.8804
711.2	-48.8935
712.6	-48.8456
714	-48.9284
715.4	-48.9785
716.8	-48.9567
718.2	-48.9284
719.6	-48.9611
721	-48.9982
722.4	-49.0374
723.8	-48.9502
725.2	-48.8652
726.6	-48.8804
728	-48.8848
729.4	-48.8586
730.8	-48.8259
732.2	-48.7257
733.6	-48.7715
735	-48.8216
736.4	-48.8303
737.8	-48.815
739.2	-48.8259
740.6	-48.8674
742	-48.9262
743.4	-48.9153
744.8	-48.839
746.2	-48.8674
747.6	-48.911
749	-48.8717
750.4	-48.8368
751.8	-48.7954
753.2	-48.802
754.6	-48.8652
756	-48.8674
757.4	-48.8325
758.8	-48.815
760.2	-48.8368
761.6	-48.9371
763	-48.9763
764.4	-48.9088
765.8	-48.8935
767.2	-48.9088
768.6	-48.8913
770	-48.8783
771.4	-48.8172
772.8	-48.7562
774.2	-48.8477
775.6	-48.8957
777	-48.8783
778.4	-48.8979
779.8	-48.9371
781.2	-48.9894
782.6	-49.0221
784	-48.9371
785.4	-48.8739
786.8	-48.924
788.2	-48.948
789.6	-48.9371
791	-48.8913
792.4	-48.8434
793.8	-48.9306
795.2	-49.0003
796.6	-48.972
798	-48.9306
799.4	-48.9197
800.8	-48.9589
802.2	-49.0091
803.6	-48.9567
805	-48.8761
806.4	-48.8652
807.8	-48.8957
809.2	-48.9131
810.6	-48.8499
812	-48.7889
813.4	-48.8129
814.8	-48.8804
816.2	-48.8412
817.6	-48.8347
819	-48.839
820.4	-48.8652
821.8	-48.8695
823.2	-48.8826
824.6	-48.7758
826	-48.7497
827.4	-48.7693
828.8	-48.7802
830.2	-48.7736
831.6	-48.7104
833	-48.7039
834.4	-48.802
835.8	-48.8041
837.2	-48.7518
838.6	-48.7366
840	-48.7584
841.4	-48.802
842.8	-48.8608
844.2	-48.7693
845.6	-48.7475
847	-48.7584
848.4	-48.7366
849.8	-48.7366
851.2	-48.6625
852.6	-48.6516
854	-48.7257
855.4	-48.7584
856.8	-48.7453
858.2	-48.7366
859.6	-48.778
861	-48.8586
862.4	-48.8848
863.8	-48.8281
865.2	-48.7497
866.6	-48.802
868	-48.8216
869.4	-48.7693
870.8	-48.7475
872.2	-48.7039
873.6	-48.7824
875	-48.9131
876.4	-48.9175
877.8	-48.9328
879.2	-48.9567
880.6	-48.996
882	-49.0483
883.4	-49.0003
884.8	-48.8761
886.2	-48.8543
887.6	-48.8826
889	-48.8717
890.4	-48.863
891.8	-48.8085
893.2	-48.8412
894.6	-48.9262
896	-48.9371
897.4	-48.887
898.8	-48.8826
900.2	-48.8695
901.6	-48.8674
903	-48.8892
904.4	-48.7845
905.8	-48.7584
907.2	-48.7845
908.6	-48.8172
910	-48.8041
911.4	-48.7736
912.8	-48.7671
914.2	-48.8499
915.6	-48.9044
917	-48.8848
918.4	-48.8543
919.8	-48.8979
921.2	-48.911
922.6	-48.9197
924	-48.8325
925.4	-48.7998
926.8	-48.8652
928.2	-48.8957
929.6	-48.8979
931	-48.8957
932.4	-48.8259
933.8	-48.9131
935.2	-48.9371
936.6	-48.9197
938	-48.887
939.4	-48.8935
940.8	-48.9284
942.2	-48.9502
943.6	-48.8783
945	-48.8107
946.4	-48.8063
947.8	-48.8259
949.2	-48.7889
950.6	-48.7671
952	-48.7257
953.4	-48.7562
954.8	-48.8783
956.2	-48.8892
957.6	-48.8892
959	-48.9088
960.4	-48.9349
961.8	-48.972
963.2	-48.9502
964.6	-48.8456
966	-48.8063
967.4	-48.839
968.8	-48.8347
970.2	-48.8259
971.6	-48.7802
973	-48.7693
974.4	-48.8761
975.8	-48.9371
977.2	-48.8804
978.6	-48.8674
980	-48.9131
981.4	-48.9698
982.8	-48.9742
984.2	-48.9153
985.6	-48.8652
987	-48.8913
988.4	-48.8935
989.8	-48.8543
991.2	-48.8041
992.6	-48.7715
994	-48.8412
995.4	-48.9066
996.8	-48.8979
998.2	-48.8892
999.6	-48.8826
1001	-48.924
1002.4	-48.9698
1003.8	-48.9306
1005.2	-48.8434
1006.6	-48.8586
1008	-48.8216
1009.4	-48.8325
1010.8	-48.8216
1012.2	-48.7693
1013.6	-48.8216
1015	-48.8935
1016.4	-48.8739
1017.8	-48.863
1019.2	-48.887
1020.6	-48.9306
1022	-49.0025
1023.4	-48.9633
1024.8	-48.8499
1026.2	-48.8783
1027.6	-48.8979
1029	-48.9001
1030.4	-48.8499
1031.8	-48.7671
1033.2	-48.7889
1034.6	-48.8804
1036	-48.911
1037.4	-48.8804
1038.8	-48.8979
1040.2	-48.972
1041.6	-49.0352
1043	-49.0723
1044.4	-49.0069
1045.8	-48.9349
1047.2	-48.9306
1048.6	-48.8739
1050	-48.8107
1051.4	-48.7453
1052.8	-48.7104
1054.2	-48.7475
1055.6	-48.7867
1057	-48.7584
1058.4	-48.754
1059.8	-48.7497
1061.2	-48.778
1062.6	-48.7845
1064	-48.7322
1065.4	-48.6603
1066.8	-48.6821
1068.2	-48.6864
1069.6	-48.6407
1071	-48.5731
1072.4	-48.5513
1073.8	-48.5992
1075.2	-48.6777
1076.6	-48.7082
1078	-48.6995
1079.4	-48.7278
1080.8	-48.778
1082.2	-48.754
1083.6	-48.6668
1085	-48.5208
1086.4	-48.523
1087.8	-48.5644
1089.2	-48.5796
1090.6	-48.5665
1092	-48.5251
1093.4	-48.5687
1094.8	-48.6734
1096.2	-48.7649
1097.6	-48.7344
1099	-48.7104
1100.4	-48.7126
1101.8	-48.7802
1103.2	-48.7824
1104.6	-48.6908
1106	-48.6712
1107.4	-48.6908
1108.8	-48.6799
1110.2	-48.6494
1111.6	-48.6145
1113	-48.6319
1114.4	-48.7497
1115.8	-48.7976
1117.2	-48.7606
1118.6	-48.7475
1120	-48.7562
1121.4	-48.778
1122.8	-48.8368
1124.2	-48.7431
1125.6	-48.6516
1127	-48.6734
1128.4	-48.6516
1129.8	-48.6603
1131.2	-48.6189
1132.6	-48.5469
1134	-48.6319
1135.4	-48.7235
1136.8	-48.7257
1138.2	-48.7169
1139.6	-48.7104
1141	-48.7278
1142.4	-48.7693
1143.8	-48.7344
1145.2	-48.6472
1146.6	-48.6668
1148	-48.7191
1149.4	-48.7082
1150.8	-48.6668
1152.2	-48.6341
1153.6	-48.6581
1155	-48.7867
1156.4	-48.7845
1157.8	-48.754
1159.2	-48.7606
1160.6	-48.7562
1162	-48.8107
1163.4	-48.8434
1164.8	-48.7715
1166.2	-48.7322
1167.6	-48.7758
1169	-48.754
1170.4	-48.7322
1171.8	-48.6799
1173.2	-48.6755
1174.6	-48.7322
1176	-48.7497
1177.4	-48.7017
1178.8	-48.7344
1180.2	-48.7627
1181.6	-48.8477
1183	-48.8674
1184.4	-48.7606
1185.8	-48.6777
1187.2	-48.7322
1188.6	-48.7257
1190	-48.6973
1191.4	-48.6603
1192.8	-48.6603
1194.2	-48.7649
1195.6	-48.839
1197	-48.7933
1198.4	-48.7693
1199.8	-48.8041
1201.2	-48.8565
1202.6	-48.9349
1204	-48.8717
1205.4	-48.8216
1206.8	-48.8085
1208.2	-48.8107
1209.6	-48.7693
1211	-48.693
1212.4	-48.6101
1213.8	-48.645
1215.2	-48.7017
1216.6	-48.6864
1218	-48.6625
1219.4	-48.6516
1220.8	-48.7278
1222.2	-48.7889
1223.6	-48.7388
1225	-48.6189
1226.4	-48.621
1227.8	-48.6755
1229.2	-48.7169
1230.6	-48.6886
1232	-48.6276
1233.4	-48.6319
1234.8	-48.7322
1236.2	-48.7758
1237.6	-48.7475
1239	-48.7322
1240.4	-48.7431
1241.8	-48.7824
1243.2	-48.7933
1244.6	-48.7366
1246	-48.7257
1247.4	-48.7911
1248.8	-48.7998
1250.2	-48.7671
1251.6	-48.7322
1253	-48.6908
1254.4	-48.7649
1255.8	-48.8129
1257.2	-48.7933
1258.6	-48.7998
1260	-48.7693
1261.4	-48.8194
1262.8	-48.8499
1264.2	-48.7889
1265.6	-48.7235
1267	-48.7584
1268.4	-48.7388
1269.8	-48.7017
1271.2	-48.6864
1272.6	-48.6189
1274	-48.7039
1275.4	-48.8085
1276.8	-48.7998
1278.2	-48.7606
1279.6	-48.7562
1281	-48.8216
1282.4	-48.9001
1283.8	-48.8783
1285.2	-48.778
1286.6	-48.8041
1288	-48.7976
1289.4	-48.7518
1290.8	-48.6886
1292.2	-48.6341
1293.6	-48.6407
1295	-48.7191
1296.4	-48.7082
1297.8	-48.7082
1299.2	-48.6886
1300.6	-48.7562
1302	-48.8238
1303.4	-48.8521
1304.8	-48.7693
1306.2	-48.7409
1307.6	-48.7758
1309	-48.7976
1310.4	-48.7366
1311.8	-48.6886
1313.2	-48.6821
1314.6	-48.7845
1316	-48.8565
1317.4	-48.8129
1318.8	-48.7606
1320.2	-48.7693
1321.6	-48.8259
1323	-48.8739
1324.4	-48.8107
1325.8	-48.7388
1327.2	-48.7824
1328.6	-48.8238
1330	-48.8085
1331.4	-48.7693
1332.8	-48.7169
1334.2	-48.7824
1335.6	-48.8456
1337	-48.8412
1338.4	-48.839
1339.8	-48.8543
1341.2	-48.9044
1342.6	-48.9567
1344	-48.9262
1345.4	-48.863
1346.8	-48.8739
1348.2	-48.8783
1349.6	-48.8674
1351	-48.8565
1352.4	-48.815
1353.8	-48.8216
1355.2	-48.9131
1356.6	-48.8586
1358	-48.8456
1359.4	-48.8368
1360.8	-48.8434
1362.2	-48.9219
1363.6	-48.9197
1365	-48.8172
1366.4	-48.8303
1367.8	-48.8238
1369.2	-48.8325
1370.6	-48.8107
1372	-48.754
1373.4	-48.7518
1374.8	-48.8674
1376.2	-48.8826
1377.6	-48.8499
1379	-48.8303
1380.4	-48.8281
1381.8	-48.8717
1383.2	-48.8913
1384.6	-48.8107
1386	-48.7562
1387.4	-48.7867
1388.8	-48.8063
1390.2	-48.7845
1391.6	-48.7649
1393	-48.7431
1394.4	-48.8412
1395.8	-48.924
1397.2	-48.9001
1398.6	-48.8892
1400	-48.863
1401.4	-48.8586
1402.8	-48.863
1404.2	-48.7366
1405.6	-48.6603
1407	-48.6821
1408.4	-48.6712
1409.8	-48.6516
1411.2	-48.6428
1412.6	-48.6167
1414	-48.6864
1415.4	-48.6995
1416.8	-48.6537
1418.2	-48.6145
1419.6	-48.6014
1421	-48.6428
1422.4	-48.6843
1423.8	-48.6603
1425.2	-48.6123
1426.6	-48.621
1428	-48.6625
1429.4	-48.6712
1430.8	-48.6516
1432.2	-48.5578
1433.6	-48.5295
1435	-48.6189
1436.4	-48.6058
1437.8	-48.5382
1439.2	-48.5295
1440.6	-48.5251
1442	-48.5905
1443.4	-48.6189
1444.8	-48.5491
1446.2	-48.5665
1447.6	-48.6298
1449	-48.6407
1450.4	-48.5971
1451.8	-48.5513
1453.2	-48.5448
1454.6	-48.6341
1456	-48.6516
1457.4	-48.5622
1458.8	-48.5622
1460.2	-48.5709
1461.6	-48.621
1463	-48.6952
1464.4	-48.6559
1465.8	-48.5818
1467.2	-48.6363
1468.6	-48.6668
1470	-48.6821
1471.4	-48.6581
1472.8	-48.5622
1474.2	-48.5665
1475.6	-48.6341
1477	-48.608
1478.4	-48.5818
1479.8	-48.6254
1481.2	-48.6777
1482.6	-48.7715
1484	-48.7213
1485.4	-48.6232
1486.8	-48.6472
1488.2	-48.6603
1489.6	-48.6407
1491	-48.5644
1492.4	-48.4793
1493.8	-48.4772
1495.2	-48.6036
1496.6	-48.5731
1498	-48.5753
1499.4	-48.5862
1500.8	-48.669
1502.2	-48.7453
1503.6	-48.7409
1505	-48.6494
1506.4	-48.6668
1507.8	-48.6952
1509.2	-48.645
1510.6	-48.5796
1512	-48.5164
1513.4	-48.4728
1514.8	-48.5687
1516.2	-48.5949
1517.6	-48.5796
1519	-48.5753
1520.4	-48.6276
1521.8	-48.706
1523.2	-48.7497
1524.6	-48.6668
1526	-48.6603
1527.4	-48.6886
1528.8	-48.7126
1530.2	-48.6821
1531.6	-48.6712
1533	-48.5774
1534.4	-48.6472
1535.8	-48.6755
1537.2	-48.6559
1538.6	-48.6319
1540	-48.6625
1541.4	-48.6755
1542.8	-48.7366
1544.2	-48.6581
1545.6	-48.6363
1547	-48.6886
1548.4	-48.7431
1549.8	-48.7322
1551.2	-48.7126
1552.6	-48.6516
1554	-48.73
1555.4	-48.7954
1556.8	-48.7867
1558.2	-48.7976
1559.6	-48.8216
1561	-48.8783
1562.4	-48.9328
1563.8	-48.9197
1565.2	-48.8085
1566.6	-48.8063
1568	-48.8608
1569.4	-48.8543
1570.8	-48.8107
1572.2	-48.778
1573.6	-48.7954
1575	-48.8761
1576.4	-48.8281
1577.8	-48.7824
1579.2	-48.7758
1580.6	-48.7998
1582	-48.8521
1583.4	-48.8717
1584.8	-48.7889
1586.2	-48.7649
1587.6	-48.8347
1589	-48.8368
1590.4	-48.7998
1591.8	-48.7584
1593.2	-48.7235
1594.6	-48.8259
1596	-48.8783
1597.4	-48.8695
1598.8	-48.8652
1600.2	-48.8935
1601.6	-48.8892
1603	-48.924
1604.4	-48.8608
1605.8	-48.7933
1607.2	-48.802
1608.6	-48.8129
1610	-48.7606
1611.4	-48.7409
1612.8	-48.7191
1614.2	-48.8194
1615.6	-48.8935
1617	-48.887
1618.4	-48.8979
1619.8	-48.9219
1621.2	-48.9219
1622.6	-48.9763
1624	-48.9066
1625.4	-48.7606
1626.8	-48.754
1628.2	-48.802
1629.6	-48.8172
1631	-48.8347
1632.4	-48.754
1633.8	-48.7497
1635.2	-48.8325
1636.6	-48.7627
1638	-48.7257
1639.4	-48.7126
1640.8	-48.7409
1642.2	-48.8063
1643.6	-48.8085
1645	-48.7344
1646.4	-48.7235
1647.8	-48.7627
1649.2	-48.7518
1650.6	-48.7039
1652	-48.6646
1653.4	-48.6319
1654.8	-48.7366
1656.2	-48.7845
1657.6	-48.7715
1659	-48.7802
1660.4	-48.7911
1661.8	-48.8608
1663.2	-48.9415
1664.6	-48.8586
1666	-48.7933
1667.4	-48.8107
1668.8	-48.8129
1670.2	-48.7867
1671.6	-48.7431
1673	-48.6952
1674.4	-48.778
1675.8	-48.8652
1677.2	-48.8586
1678.6	-48.8521
1680	-48.8804
1681.4	-48.911
1682.8	-48.9611
1684.2	-48.9066
1685.6	-48.8041
1687	-48.8259
1688.4	-48.8543
1689.8	-48.8041
1691.2	-48.778
1692.6	-48.7104
1694	-48.73
1695.4	-48.8085
1696.8	-48.7976
1698.2	-48.8107
1699.6	-48.7889
1701	-48.8303
1702.4	-48.8804
1703.8	-48.8717
1705.2	-48.754
1706.6	-48.7278
1708	-48.7322
1709.4	-48.7431
1710.8	-48.7475
1712.2	-48.706
1713.6	-48.6995
1715	-48.8041
1716.4	-48.7954
1717.8	-48.7802
1719.2	-48.7453
1720.6	-48.7845
1722	-48.8608
1723.4	-48.8783
1724.8	-48.802
1726.2	-48.7562
1727.6	-48.7606
1729	-48.7671
1730.4	-48.7497
1731.8	-48.7388
1733.2	-48.7126
1734.6	-48.7998
1736	-48.8325
1737.4	-48.839
1738.8	-48.8129
1740.2	-48.7911
1741.6	-48.778
1743	-48.8368
1744.4	-48.8041
1745.8	-48.7649
1747.2	-48.7802
1748.6	-48.8194
1750	-48.8129
1751.4	-48.7976
1752.8	-48.7693
1754.2	-48.8085
1755.6	-48.887
1757	-48.8674
1758.4	-48.815
1759.8	-48.8063
1761.2	-48.7802
1762.6	-48.8281
1764	-48.8238
1765.4	-48.7213
1766.8	-48.6886
1768.2	-48.73
1769.6	-48.778
1771	-48.7998
1772.4	-48.7475
1773.8	-48.7518
1775.2	-48.8281
1776.6	-48.8216
1778	-48.8325
1779.4	-48.8259
1780.8	-48.8652
1782.2	-48.911
1783.6	-48.9262
1785	-48.8412
1786.4	-48.8325
1787.8	-48.8543
1789.2	-48.911
1790.6	-48.8848
1792	-48.8129
1793.4	-48.7933
1794.8	-48.8892
1796.2	-48.9001
1797.6	-48.8652
1799	-48.8172
1800.4	-48.8608
1801.8	-48.9415
1803.2	-49.0221
1804.6	-48.9611
1806	-48.9437
1807.4	-48.9894
1808.8	-49.0178
1810.2	-48.9916
1811.6	-48.9349
1813	-48.8935
1814.4	-48.9589
1815.8	-48.9894
1817.2	-49.0025
1818.6	-48.9916
1820	-49.0287
1821.4	-49.0941
1822.8	-49.1355
1824.2	-49.0766
1825.6	-49.0025
1827	-48.9938
1828.4	-49.0352
1829.8	-49.02
1831.2	-48.9873
1832.6	-48.8804
1834	-48.8892
1835.4	-48.9633
1836.8	-48.9415
1838.2	-48.911
1839.6	-48.9262
1841	-48.9524
1842.4	-49.0025
1843.8	-48.9763
1845.2	-48.8717
1846.6	-48.8717
1848	-48.9349
1849.4	-48.9349
1850.8	-48.9088
1852.2	-48.8521
1853.6	-48.815
1855	-48.8935
1856.4	-48.911
1857.8	-48.9088
1859.2	-48.9131
1860.6	-48.9502
1862	-48.9894
1863.4	-49.0069
1864.8	-48.9175
1866.2	-48.8674
1867.6	-48.8826
1869	-48.9306
1870.4	-48.9131
1871.8	-48.9262
1873.2	-48.9066
1874.6	-49.0025
1876	-49.0548
1877.4	-49.0309
1878.8	-48.9873
1880.2	-48.9829
1881.6	-49.0047
1883	-49.0788
1884.4	-49.0069
1885.8	-48.9131
1887.2	-48.9371
1888.6	-48.9306
1890	-48.8717
1891.4	-48.8259
1892.8	-48.7715
1894.2	-48.8543
1895.6	-48.9219
1897	-48.8979
1898.4	-48.8739
1899.8	-48.8477
1901.2	-48.8892
1902.6	-48.9502
1904	-48.924
1905.4	-48.8543
1906.8	-48.8565
1908.2	-48.8935
1909.6	-48.8717
1911	-48.8434
1912.4	-48.7976
1913.8	-48.8259
1915.2	-48.9175
1916.6	-48.9393
1918	-48.9546
1919.4	-48.9982
1920.8	-49.0461
1922.2	-49.057
1923.6	-49.0374
1925	-48.9546
1926.4	-48.9458
1927.8	-48.972
1929.2	-48.9982
1930.6	-48.972
1932	-48.9589
1933.4	-48.8826
1934.8	-48.9916
1936.2	-49.0134
1937.6	-48.9873
1939	-48.9785
1940.4	-49.0091
1941.8	-49.02
1943.2	-49.0418
1944.6	-48.9894
1946	-48.9371
1947.4	-48.9284
1948.8	-48.9284
1950.2	-48.924
1951.6	-48.8804
1953	-48.8194
1954.4	-48.8848
1955.8	-48.924
1957.2	-48.9546
1958.6	-48.924
1960	-48.9633
1961.4	-48.9676
1962.8	-49.0178
1964.2	-48.9851
1965.6	-48.9001
1967	-48.9001
1968.4	-48.9088
1969.8	-48.8979
1971.2	-48.8783
1972.6	-48.8085
1974	-48.8739
1975.4	-48.9611
1976.8	-48.972
1978.2	-48.9197
1979.6	-48.9349
1981	-48.9807
1982.4	-49.0287
1983.8	-49.0396
1985.2	-48.9785
1986.6	-48.9546
1988	-48.9807
1989.4	-48.9611
1990.8	-48.9437
1992.2	-48.8652
1993.6	-48.8107
1995	-48.9001
1996.4	-48.9284
1997.8	-48.8935
1999.2	-48.8608
2000.6	-48.8543
2002	-48.9131
2003.4	-48.9349
2004.8	-48.839
2006.2	-48.7649
2007.6	-48.7933
2009	-48.7758
2010.4	-48.73
2011.8	-48.7039
2013.2	-48.6668
2014.6	-48.7824
2016	-48.8804
2017.4	-48.8848
2018.8	-48.9197
2020.2	-48.9567
2021.6	-48.9698
2023	-49.0243
2024.4	-48.9676
2025.8	-48.9022
2027.2	-48.9022
2028.6	-48.9371
2030	-48.9066
2031.4	-48.887
2032.8	-48.8521
2034.2	-48.911
2035.6	-49.0091
2037	-49.0178
2038.4	-48.9982
2039.8	-49.0265
2041.2	-49.0657
2042.6	-49.1616
2044	-49.166
2045.4	-49.0679
2046.8	-49.0788
2048.2	-49.142
2049.6	-49.142
2051	-49.1071
2052.4	-49.0309
2053.8	-49.0374
2055.2	-49.0875
2056.6	-49.0788
2058	-49.0439
2059.4	-49.0243
2060.8	-49.0243
2062.2	-49.0592
2063.6	-49.0701
2065	-48.9938
2066.4	-48.9676
2067.8	-49.0505
2069.2	-49.0505
2070.6	-49.0069
2072	-48.948
2073.4	-48.887
2074.8	-48.9524
2076.2	-48.9873
2077.6	-48.9502
2079	-48.9153
2080.4	-48.9349
2081.8	-48.9742
2083.2	-49.0396
2084.6	-48.972
2086	-48.9219
2087.4	-48.9197
2088.8	-48.9458
2090.2	-48.8957
2091.6	-48.8935
2093	-48.8172
2094.4	-48.8848
2095.8	-48.9611
2097.2	-48.9437
2098.6	-48.9284
2100	-48.9742
2101.4	-48.9763
2102.8	-49.0418
2104.2	-48.972
2105.6	-48.8717
2107	-48.8717
2108.4	-48.9001
2109.8	-48.863
2111.2	-48.8347
2112.6	-48.8041
2114	-48.8586
2115.4	-48.9611
2116.8	-48.9982
2118.2	-48.9742
2119.6	-48.9894
2121	-49.0069
2122.4	-49.0788
2123.8	-49.033
2125.2	-48.9088
2126.6	-48.9022
2128	-48.8804
2129.4	-48.9001
2130.8	-48.8652
2132.2	-48.802
2133.6	-48.7562
2135	-48.863
2136.4	-48.9044
2137.8	-48.8826
2139.2	-48.887
2140.6	-48.9328
2142	-48.9763
2143.4	-49.0265
2144.8	-48.9502
2146.2	-48.8783
2147.6	-48.911
2149	-48.9153
2150.4	-48.8913
2151.8	-48.8565
2153.2	-48.8347
2154.6	-48.9066
2156	-48.9829
2157.4	-48.9284
2158.8	-48.9066
2160.2	-48.8957
2161.6	-48.8979
2163	-48.9437
2164.4	-48.9088
2165.8	-48.8565
2167.2	-48.8652
2168.6	-48.8848
2170	-48.8586
2171.4	-48.8347
2172.8	-48.778
2174.2	-48.8063
2175.6	-48.8608
2177	-48.8761
2178.4	-48.8783
2179.8	-48.8979
2181.2	-48.9524
2182.6	-48.9894
2184	-48.9763
2185.4	-48.8848
2186.8	-48.8761
2188.2	-48.8695
2189.6	-48.8368
2191	-48.8412
2192.4	-48.8085
2193.8	-48.8368
2195.2	-48.9742
2196.6	-49.0003
2198	-48.9807
2199.4	-48.9371
2200.8	-48.9502
2202.2	-48.9851
2203.6	-49.0047
2205	-48.9131
2206.4	-48.8586
2207.8	-48.8892
2209.2	-48.8913
2210.6	-48.8783
2212	-48.8325
2213.4	-48.8063
2214.8	-48.8804
2216.2	-48.9546
2217.6	-48.9262
2219	-48.9393
2220.4	-48.9524
2221.8	-48.9894
2223.2	-49.0047
2224.6	-48.911
2226	-48.8586
2227.4	-48.863
2228.8	-48.9153
2230.2	-48.8826
2231.6	-48.863
2233	-48.8085
2234.4	-48.8477
2235.8	-48.9393
2237.2	-48.9371
2238.6	-48.9349
2240	-48.9807
2241.4	-48.9829
2242.8	-49.0439
2244.2	-49.0156
2245.6	-48.9328
2247	-48.9262
2248.4	-48.9676
2249.8	-48.9328
2251.2	-48.887
2252.6	-48.8412
2254	-48.863
2255.4	-48.9153
2256.8	-48.9219
2258.2	-48.8761
2259.6	-48.8892
2261	-48.9131
2262.4	-48.9524
2263.8	-48.9851
2265.2	-48.9131
2266.6	-48.8848
2268	-48.9219
2269.4	-48.9175
2270.8	-48.9458
2272.2	-48.9131
2273.6	-48.8761
2275	-48.948
2276.4	-49.0112
2277.8	-49.0156
2279.2	-49.0309
2280.6	-49.0526
2282	-49.1224
2283.4	-49.1922
2284.8	-49.118
2286.2	-49.0505
2287.6	-49.0788
2289	-49.0897
2290.4	-49.0592
2291.8	-49.0047
2293.2	-48.9611
2294.6	-49.0287
2296	-49.0919
2297.4	-49.0679
2298.8	-48.9982
2300.2	-48.9654
2301.6	-49.0069
2303	-49.0744
2304.4	-49.0657
2305.8	-48.9873
2307.2	-48.996
2308.6	-48.9916
2310	-48.9633
2311.4	-48.9262
2312.8	-48.8434
2314.2	-48.8848
2315.6	-48.9894
2317	-48.9763
2318.4	-48.9633
2319.8	-49.0047
2321.2	-49.0614
2322.6	-49.1529
2324	-49.1616
2325.4	-49.0418
2326.8	-49.0091
2328.2	-49.02
2329.6	-49.0134
2331	-49.0047
2332.4	-48.9458
2333.8	-48.9001
2335.2	-48.9589
2336.6	-48.9807
2338	-48.9393
2339.4	-48.9393
2340.8	-48.9197
2342.2	-48.9589
2343.6	-48.996
2345	-48.8979
2346.4	-48.8477
2347.8	-48.9044
2349.2	-48.9284
2350.6	-48.9197
2352	-48.9022
2353.4	-48.8695
2354.8	-48.9044
2356.2	-48.9567
2357.6	-48.911
2359	-48.8412
2360.4	-48.8412
2361.8	-48.839
2363.2	-48.8804
2364.6	-48.8456
2366	-48.7736
2367.4	-48.7562
2368.8	-48.7802
2370.2	-48.7758
2371.6	-48.7584
2373	-48.6843
2374.4	-48.7322
2375.8	-48.8347
2377.2	-48.863
2378.6	-48.7998
2380	-48.7845
2381.4	-48.8586
2382.8	-48.9001
2384.2	-48.8194
2385.6	-48.7453
2387	-48.7671
2388.4	-48.802
2389.8	-48.8107
2391.2	-48.8041
2392.6	-48.7693
2394	-48.7976
2395.4	-48.8957
2396.8	-48.9022
2398.2	-48.887
2399.6	-48.8892
2401	-48.911
2402.4	-48.9742
2403.8	-48.9306
2405.2	-48.8586
2406.6	-48.8325
2408	-48.9001
2409.4	-48.9328
2410.8	-48.9328
2412.2	-48.9088
2413.6	-48.8913
2415	-48.9763
2416.4	-49.033
2417.8	-48.9502
2419.2	-48.9371
2420.6	-48.9894
2422	-49.0505
2423.4	-49.0875
2424.8	-49.0483
2426.2	-48.9916
2427.6	-49.0265
2429	-49.0461
2430.4	-49.0374
2431.8	-48.9807
2433.2	-48.9306
2434.6	-49.0025
2436	-49.0875
2437.4	-49.0635
2438.8	-49.0418
2440.2	-49.0439
2441.6	-49.0483
2443	-49.0962
2444.4	-49.0635
2445.8	-48.9437
2447.2	-48.9458
2448.6	-48.9567
2450	-48.9415
2451.4	-48.9219
2452.8	-48.8979
2454.2	-48.9502
2455.6	-49.0439
2457	-49.0592
2458.4	-49.0178
2459.8	-49.0526
2461.2	-49.081
2462.6	-49.105
2464	-49.1268
2465.4	-49.0439
2466.8	-49.0112
2468.2	-49.0112
2469.6	-49.0439
2471	-49.0221
2472.4	-48.9742
2473.8	-48.9654
2475.2	-49.0461
2476.6	-49.0505
2478	-49.0178
2479.4	-49.0025
2480.8	-49.0265
2482.2	-49.0984
2483.6	-49.1638
2485	-49.0788
2486.4	-49.0003
2487.8	-49.0635
2489.2	-49.0439
2490.6	-49.0309
2492	-49.0003
2493.4	-48.9458
2494.8	-48.9763
2496.2	-49.0418
2497.6	-49.0287
2499	-49.0112
2500.4	-49.0047
2501.8	-49.0265
2503.2	-49.0679
2504.6	-49.0526
2506	-48.9829
2507.4	-48.972
2508.8	-49.0025
2510.2	-49.0047
2511.6	-48.9393
2513	-48.8892
2514.4	-48.9306
2515.8	-49.02
2517.2	-48.9829
2518.6	-48.9676
2520	-48.9938
2521.4	-49.0461
2522.8	-49.0788
2524.2	-49.0548
2525.6	-48.9589
2527	-48.9502
2528.4	-49.0069
2529.8	-49.0178
2531.2	-48.9938
2532.6	-48.9306
2534	-48.9393
2535.4	-49.0418
2536.8	-49.0723
2538.2	-49.033
2539.6	-49.0352
2541	-49.0657
2542.4	-49.1268
2543.8	-49.1529
2545.2	-49.0832
2546.6	-49.0374
2548	-49.0919
2549.4	-49.0788
2550.8	-49.0614
2552.2	-48.9982
2553.6	-48.9044
2555	-48.9567
2556.4	-48.996
2557.8	-48.9589
2559.2	-48.9502
2560.6	-48.9633
2562	-49.02
2563.4	-49.081
2564.8	-49.057
2566.2	-48.9785
2567.6	-49.0265
2569	-49.0897
2570.4	-49.1573
2571.8	-49.1486
2573.2	-49.142
2574.6	-49.1987
2576	-49.2837
2577.4	-49.251
2578.8	-49.227
2580.2	-49.2423
2581.6	-49.3164
2583	-49.3469
2584.4	-49.3273
2585.8	-49.2358
2587.2	-49.2663
2588.6	-49.2837
2590	-49.3033
2591.4	-49.2576
2592.8	-49.1965
2594.2	-49.1725
2595.6	-49.2685
2597	-49.2924
2598.4	-49.2794
2599.8	-49.2314
2601.2	-49.2445
2602.6	-49.299
2604	-49.312
2605.4	-49.2096
2606.8	-49.2161
2608.2	-49.2358
2609.6	-49.2641
2611	-49.2292
2612.4	-49.1813
2613.8	-49.1224
2615.2	-49.2139
2616.6	-49.2205
2618	-49.1965
2619.4	-49.19
2620.8	-49.19
2622.2	-49.227
2623.6	-49.2619
2625	-49.1943
2626.4	-49.1377
2627.8	-49.1922
2629.2	-49.1965
2630.6	-49.1464
2632	-49.118
2633.4	-49.0396
2634.8	-49.0788
2636.2	-49.2009
2637.6	-49.1943
2639	-49.1922
2640.4	-49.2074
2641.8	-49.2292
2643.2	-49.3077
2644.6	-49.2859
2646	-49.166
2647.4	-49.19
2648.8	-49.227
2650.2	-49.1856
2651.6	-49.1551
2653	-49.0592
2654.4	-49.0679
2655.8	-49.1834
2657.2	-49.1834
2658.6	-49.2074
2660	-49.1922
2661.4	-49.2183
2662.8	-49.251
2664.2	-49.2576
2665.6	-49.1682
2667	-49.1137
2668.4	-49.1159
2669.8	-49.1246
2671.2	-49.0875
2672.6	-49.0265
2674	-49.0091
2675.4	-49.1224
2676.8	-49.1398
2678.2	-49.1071
2679.6	-49.0919
2681	-49.1246
2682.4	-49.1551
2683.8	-49.1638
2685.2	-49.0701
2686.6	-49.0025
2688	-49.0069
2689.4	-49.0134
2690.8	-48.9829
2692.2	-48.9502
2693.6	-48.9044
2695	-49.0047
2696.4	-49.0614
2697.8	-49.0657
2699.2	-49.0461
2700.6	-49.0657
2702	-49.0766
2703.4	-49.1115
2704.8	-49.0548
2706.2	-49.0134
2707.6	-48.9982
2709	-49.0156
2710.4	-48.9807
2711.8	-48.9458
2713.2	-48.8259
2714.6	-48.8892
2716	-48.9654
2717.4	-48.9829
2718.8	-49.0091
2720.2	-49.0309
2721.6	-49.0614
2723	-49.1159
2724.4	-49.0832
2725.8	-48.9851
2727.2	-48.9916
2728.6	-48.9807
2730	-48.9589
2731.4	-48.8957
2732.8	-48.7998
2734.2	-48.8041
2735.6	-48.9197
2737	-48.9589
2738.4	-48.9502
2739.8	-48.9371
2741.2	-48.9633
2742.6	-48.9698
2744	-49.02
2745.4	-48.9458
2746.8	-48.9328
2748.2	-49.0047
2749.6	-49.0352
2751	-48.9916
2752.4	-48.9022
2753.8	-48.8695
2755.2	-48.9546
2756.6	-48.9938
2758	-48.9763
2759.4	-48.9916
2760.8	-49.0461
2762.2	-49.0635
2763.6	-49.0701
2765	-48.9698
2766.4	-48.9131
2767.8	-48.924
2769.2	-48.9088
2770.6	-48.8935
2772	-48.8521
2773.4	-48.7933
2774.8	-48.8543
2776.2	-48.9437
2777.6	-48.9371
2779	-48.9349
2780.4	-48.9393
2781.8	-48.9763
2783.2	-49.0134
2784.6	-48.9894
2786	-48.9197
2787.4	-48.9306
2788.8	-48.9524
2790.2	-48.9524
2791.6	-48.924
2793	-48.887
2794.4	-48.9088
2795.8	-49.0178
[truncated: 943,300+ more rows]

## Sheet: Figure 1Dii
TTX/ACSF	NMDG/ACSF	TTX/ACSF
-45.72	-67.23	-54.57
-50.84	-65.8	-51.3
-40.92	-70.95	-67.6
-54.84	-69.43	-60.12
-45.93	-61.5	-47.5
-52.25	-64.12	-59.36
-45.07	-54.75	-50.42
-43.24	-63.39	-58.62
-54.29	-60.52	-53.12
-43.21	-50.26	-47
-51.76	-57.86	-51.51
-44.37	-50.46	-44.49
-48.98	-55.39	-48.39
-49.18	-55.08	-49.74
-47.79	-55.63	-49.34
-48.43	-56.58	-50.66
-51.06	-59.88	-53.41
