# Supplementary material for: The cation channel mechanisms of subthreshold inward depolarizing currents in the mice VTA dopaminergic neurons and their roles in the chronic-stress-induced depression-like behavior
Source: eLife. 2024 Dec 6;12:RP88319. doi: 10.7554/eLife.88319 (PMC11623934; doi:10.7554/eLife.88319)
Supplement: Figure 2—figure supplement 3—source data 1. [file elife-88319-fig2-figsupp3-data1.xlsx]

## Sheet: A i
time	ACSF	CsCl3	ACSF
0	-54.4739	-57.9529	-56.8543
0.1	-54.5044	-58.0139	-56.8848
0.2	-54.596	-58.1055	-56.9763
0.3	-54.4739	-57.9529	-56.8237
0.4	-54.596	-58.0444	-56.9153
0.5	-54.5349	-57.9529	-56.8848
0.6	-54.4739	-58.0139	-56.7932
0.7	-54.5044	-57.8918	-56.8848
0.8	-54.4739	-57.9529	-56.8848
0.9	-54.4128	-57.9834	-56.8848
1	-54.4739	-57.8918	-56.8848
1.1	-54.596	-58.075	-56.9458
1.2	-54.4128	-58.0139	-56.7932
1.3	-54.4739	-58.0139	-56.8237
1.4	-54.4739	-57.9529	-56.8237
1.5	-54.3823	-58.0444	-56.8543
1.6	-54.3823	-57.9224	-56.8237
1.7	-54.4128	-57.8918	-56.7627
1.8	-54.3823	-57.8613	-56.8848
1.9	-54.4128	-57.9224	-56.8543
2	-54.5654	-57.9529	-56.8848
2.1	-54.4128	-57.9529	-56.8543
2.2	-54.4739	-57.8918	-56.8237
2.3	-54.3823	-57.9529	-56.7627
2.4	-54.3213	-57.9834	-56.8848
2.5	-54.4128	-57.9529	-56.8848
2.6	-54.3823	-57.9224	-56.7017
2.7	-54.2908	-57.9834	-56.8848
2.8	-54.3518	-57.9224	-56.8237
2.9	-54.4434	-57.9834	-56.8237
3	-54.3518	-57.9529	-56.8543
3.1	-54.4739	-57.8613	-56.9153
3.2	-54.5044	-58.0139	-56.7322
3.3	-54.3518	-57.9529	-56.8543
3.4	-54.3823	-57.8003	-56.8543
3.5	-54.4739	-57.9529	-56.7322
3.6	-54.3213	-57.8613	-56.8237
3.7	-54.3823	-57.8918	-56.8543
3.8	-54.4128	-57.9834	-56.8543
3.9	-54.3823	-57.9529	-56.8237
4	-54.3518	-57.9224	-56.8848
4.1	-54.3823	-57.9224	-56.7322
4.2	-54.3823	-57.9834	-56.7932
4.3	-54.3823	-57.8613	-56.8237
4.4	-54.4128	-57.9224	-56.7932
4.5	-54.3823	-57.8308	-56.9153
4.6	-54.4128	-57.8918	-56.7932
4.7	-54.3823	-57.8918	-56.8848
4.8	-54.3823	-57.9224	-56.7932
4.9	-54.4739	-57.9529	-56.8848
5	-54.3823	-57.8308	-56.8237
5.1	-54.4434	-57.9529	-56.8543
5.2	-54.4739	-57.8918	-56.7322
5.3	-54.2908	-57.9834	-56.8237
5.4	-54.3823	-57.8613	-56.9763
5.5	-54.4739	-57.9529	-56.8237
5.6	-54.4128	-57.8918	-57.0068
5.7	-54.4434	-57.8003	-56.9458
5.8	-54.5654	-58.0139	-56.8237
5.9	-54.3518	-57.8918	-56.8237
6	-54.4739	-57.9529	-56.8543
6.1	-54.4434	-57.9529	-56.7627
6.2	-54.4128	-58.0139	-56.8543
6.3	-54.4128	-57.8613	-56.9763
6.4	-54.4434	-57.9224	-56.7932
6.5	-54.4128	-57.9224	-56.9763
6.6	-54.4128	-57.9529	-56.9763
6.7	-54.5044	-57.9834	-56.9458
6.8	-54.3823	-57.9834	-56.8848
6.9	-54.5349	-58.0139	-56.9458
7	-54.4128	-57.9529	-56.8237
7.1	-54.4128	-58.0444	-56.9153
7.2	-54.4739	-57.9529	-57.0068
7.3	-54.5044	-57.9834	-56.8543
7.4	-54.3518	-57.9834	-57.0679
7.5	-54.5044	-57.9529	-56.9153
7.6	-54.596	-58.0444	-56.9458
7.7	-54.3823	-57.9834	-56.9458
7.8	-54.596	-58.0139	-56.9153
7.9	-54.596	-57.9529	-56.8237
8	-54.4128	-58.0139	-56.9153
8.1	-54.4739	-57.8918	-56.8543
8.2	-54.5044	-57.9834	-56.8237
8.3	-54.2908	-57.8918	-57.0374
8.4	-54.4128	-57.8918	-56.8543
8.5	-54.5349	-57.9529	-56.9458
8.6	-54.3823	-57.8918	-56.8848
8.7	-54.4128	-57.9529	-56.8543
8.8	-54.3823	-57.8918	-56.7932
8.9	-54.3518	-57.9529	-56.8543
9	-54.3518	-57.8003	-56.7932
9.1	-54.3823	-57.8613	-56.7932
9.2	-54.3213	-57.8003	-56.8848
9.3	-54.3213	-57.8003	-56.7627
9.4	-54.3823	-57.8308	-56.8543
9.5	-54.3518	-57.8003	-56.8237
9.6	-54.4434	-57.9224	-56.7932
9.7	-54.2602	-57.7698	-56.8237
9.8	-54.4128	-57.8613	-56.8543
9.9	-54.3823	-57.8003	-56.7627
10	-54.2908	-57.8308	-56.7932
10.1	-54.2602	-57.7087	-56.8237
10.2	-54.3823	-57.8308	-56.7627
10.3	-54.3213	-57.7087	-56.9458
10.4	-54.3823	-57.7393	-56.8237
10.5	-54.4739	-57.8308	-56.7932
10.6	-54.2908	-57.8003	-56.8543
10.7	-54.3823	-57.8003	-56.8848
10.8	-54.3518	-57.8308	-56.7322
10.9	-54.3213	-57.8613	-56.8848
11	-54.2908	-57.7087	-56.9153
11.1	-54.3518	-57.8308	-56.7932
11.2	-54.3518	-57.8003	-57.0068
11.3	-54.4739	-57.6782	-56.9153
11.4	-54.4434	-57.8613	-56.9153
11.5	-54.2908	-57.8003	-56.9763
11.6	-54.5349	-57.8308	-56.9763
11.7	-54.4434	-57.8918	-56.8237
11.8	-54.3823	-57.9529	-56.9153
11.9	-54.4434	-57.7698	-56.9458
12	-54.5044	-57.7698	-56.9153
12.1	-54.3213	-57.7698	-57.0068
12.2	-54.4739	-57.8003	-57.0374
12.3	-54.5654	-57.8918	-57.0068
12.4	-54.2908	-57.8003	-56.9458
12.5	-54.5044	-57.8918	-56.9458
12.6	-54.4739	-57.8308	-56.8848
12.7	-54.4434	-57.8308	-56.9763
12.8	-54.4739	-57.8003	-56.9153
12.9	-54.5044	-57.8613	-56.9458
13	-54.3823	-57.7087	-56.9153
13.1	-54.4128	-57.7698	-56.8848
13.2	-54.5044	-57.8613	-57.0374
13.3	-54.4128	-57.7087	-56.9763
13.4	-54.5044	-57.8918	-56.8543
13.5	-54.4128	-57.9224	-56.9458
13.6	-54.4434	-57.8918	-56.9763
13.7	-54.3823	-57.8003	-56.7932
13.8	-54.4128	-57.8613	-56.9153
13.9	-54.3823	-57.7393	-57.0068
14	-54.4128	-57.8308	-56.7932
14.1	-54.4128	-57.8308	-56.9458
14.2	-54.4128	-57.8003	-56.9458
14.3	-54.5044	-57.8918	-56.8237
14.4	-54.2908	-57.7698	-56.9153
14.5	-54.4434	-57.8308	-57.0374
14.6	-54.4739	-57.8003	-56.8543
14.7	-54.3823	-57.8613	-56.8237
14.8	-54.3213	-57.7087	-56.9458
14.9	-54.3823	-57.8308	-56.7932
15	-54.3518	-57.8003	-56.8848
15.1	-54.3518	-57.7087	-56.8543
15.2	-54.4739	-57.9224	-56.8848
15.3	-54.3518	-57.8308	-56.7627
15.4	-54.4434	-57.8613	-56.7627
15.5	-54.3213	-57.8613	-56.8237
15.6	-54.3213	-57.8308	-56.8543
15.7	-54.3823	-57.7393	-56.8237
15.8	-54.3518	-57.8613	-56.8543
15.9	-54.3213	-57.7698	-56.8848
16	-54.3213	-57.7087	-56.7627
16.1	-54.4128	-57.8003	-56.9458
16.2	-54.2297	-57.7698	-56.9153
16.3	-54.4128	-57.7698	-56.8237
16.4	-54.3213	-57.7393	-56.8543
16.5	-54.2602	-57.7698	-56.9153
16.6	-54.3213	-57.6782	-56.8237
16.7	-54.3518	-57.7087	-56.8848
16.8	-54.2602	-57.7393	-57.0374
16.9	-54.3823	-57.6782	-56.7627
17	-54.5044	-57.7698	-56.9458
17.1	-54.2602	-57.6782	-56.9458
17.2	-54.4128	-57.8308	-56.8543
17.3	-54.3823	-57.6477	-56.8237
17.4	-54.2908	-57.6477	-56.9153
17.5	-54.3518	-57.7393	-56.8543
17.6	-54.3518	-57.7393	-56.8543
17.7	-54.2297	-57.6782	-57.0374
17.8	-54.2602	-57.7087	-56.8848
17.9	-54.4128	-57.7393	-56.9763
18	-54.2908	-57.6477	-56.8848
18.1	-54.3823	-57.8613	-56.9153
18.2	-54.2908	-57.7393	-56.8543
18.3	-54.3213	-57.7087	-56.8543
18.4	-54.2908	-57.7698	-56.8848
18.5	-54.3518	-57.8308	-56.9458
18.6	-54.3213	-57.6477	-56.9763
18.7	-54.3518	-57.7393	-56.9458
18.8	-54.3518	-57.7393	-57.0068
18.9	-54.3213	-57.7698	-56.8543
19	-54.4128	-57.8308	-57.0068
19.1	-54.2908	-57.8918	-57.0068
19.2	-54.4128	-57.7393	-56.9458
19.3	-54.3823	-57.8003	-56.9763
19.4	-54.3213	-57.8003	-57.0068
19.5	-54.2908	-57.7698	-57.0068
19.6	-54.4128	-57.8308	-56.9763
19.7	-54.3518	-57.8003	-57.0984
19.8	-54.3518	-57.8003	-56.9763
19.9	-54.4128	-57.8918	-57.0068
20	-54.3823	-57.8918	-57.0374
20.1	-54.4128	-57.8613	-57.0068
20.2	-54.3518	-57.8308	-56.9458
20.3	-54.2908	-57.8613	-57.0679
20.4	-54.3823	-57.8003	-57.0679
20.5	-54.3213	-57.8918	-57.0374
20.6	-54.3213	-57.8003	-57.0984
20.7	-54.3823	-57.7698	-56.9458
20.8	-54.4128	-57.9224	-57.0374
20.9	-54.2908	-57.8613	-56.9458
21	-54.3823	-57.7698	-56.9153
21.1	-54.3823	-57.8003	-56.8543
21.2	-54.1992	-57.8003	-56.9153
21.3	-54.2908	-57.7393	-56.9458
21.4	-54.3518	-57.8613	-56.9763
21.5	-54.2297	-57.8003	-56.9763
21.6	-54.2908	-57.7698	-56.9153
21.7	-54.4128	-57.8003	-57.0374
21.8	-54.1992	-57.7393	-56.9458
21.9	-54.3518	-57.8613	-56.9458
22	-54.3518	-57.7698	-56.9153
22.1	-54.2297	-57.8003	-56.8848
22.2	-54.1992	-57.7393	-56.9153
22.3	-54.2602	-57.7698	-56.9153
22.4	-54.2602	-57.6477	-56.9458
22.5	-54.2297	-57.7393	-56.8848
22.6	-54.3518	-57.7698	-56.9763
22.7	-54.1382	-57.7393	-56.8848
22.8	-54.2908	-57.9224	-56.9458
22.9	-54.1992	-57.7393	-56.9153
23	-54.2602	-57.7087	-56.9153
23.1	-54.2602	-57.8003	-56.9153
23.2	-54.1992	-57.8308	-56.9458
23.3	-54.1992	-57.6782	-57.0068
23.4	-54.2908	-57.7698	-56.9763
23.5	-54.2602	-57.8003	-57.0984
23.6	-54.1992	-57.6172	-56.8848
23.7	-54.4128	-57.8308	-57.0374
23.8	-54.1992	-57.8003	-56.9763
23.9	-54.2908	-57.8003	-56.9458
24	-54.3213	-57.7393	-57.0068
24.1	-54.1992	-57.8918	-57.0068
24.2	-54.1992	-57.7393	-57.0068
24.3	-54.2908	-57.7698	-57.0068
24.4	-54.2908	-57.7698	-57.0679
24.5	-54.2602	-57.7393	-56.8848
24.6	-54.3823	-57.8613	-57.0374
24.7	-54.2602	-57.7087	-56.9763
24.8	-54.3213	-57.8308	-56.9763
24.9	-54.2908	-57.7698	-56.9763
25	-54.2908	-57.7698	-56.9763
25.1	-54.2908	-57.7698	-57.0374
25.2	-54.2908	-57.7698	-57.0068
25.3	-54.2602	-57.6782	-57.0984
25.4	-54.3518	-57.7393	-57.0374
25.5	-54.4434	-57.8308	-57.0679
25.6	-54.2602	-57.7087	-56.9458
25.7	-54.4128	-57.8003	-57.0374
25.8	-54.3518	-57.8003	-57.0068
25.9	-54.2908	-57.8308	-57.0068
26	-54.3518	-57.8003	-57.0984
26.1	-54.3823	-57.8613	-56.9763
26.2	-54.2602	-57.7087	-57.0984
26.3	-54.3823	-57.8308	-57.0374
26.4	-54.5044	-57.8918	-57.1594
26.5	-54.2602	-57.8308	-57.0068
26.6	-54.4128	-57.9834	-57.0679
26.7	-54.4128	-57.8308	-57.0374
26.8	-54.3518	-57.8918	-56.9153
26.9	-54.3213	-57.9224	-57.0679
27	-54.3823	-57.8918	-57.0374
27.1	-54.2908	-57.8308	-57.0679
27.2	-54.3213	-57.9224	-57.0374
27.3	-54.4128	-57.9834	-57.1594
27.4	-54.3823	-57.9224	-57.0068
27.5	-54.5044	-58.0444	-57.0984
27.6	-54.3823	-57.9529	-57.0679
27.7	-54.3823	-57.8918	-56.9153
27.8	-54.4434	-57.9224	-57.0374
27.9	-54.3823	-57.9834	-57.0374
28	-54.4128	-57.8003	-57.0984
28.1	-54.3823	-57.9224	-57.0374
28.2	-54.4434	-57.9224	-57.0984
28.3	-54.3518	-57.8308	-57.0068
28.4	-54.4739	-57.9529	-57.0374
28.5	-54.3213	-57.8918	-56.9763
28.6	-54.4128	-57.8918	-57.0374
28.7	-54.3823	-57.8918	-56.9458
28.8	-54.3213	-57.9224	-57.0374
28.9	-54.2908	-57.8613	-57.0984
29	-54.3518	-57.8308	-57.0068
29.1	-54.4128	-57.8613	-56.9458
29.2	-54.3823	-57.7698	-57.0374
29.3	-54.4434	-57.8613	-57.0374
29.4	-54.3213	-57.7698	-56.9458
29.5	-54.4434	-57.8918	-57.0068
29.6	-54.2908	-57.8003	-56.9763
29.7	-54.2908	-57.7698	-56.9153
29.8	-54.3518	-57.7698	-57.0068
29.9	-54.3213	-57.8003	-57.0679
30	-54.2908	-57.6477	-56.9153
30.1	-54.3518	-57.7698	-57.0374
30.2	-54.4434	-57.8918	-57.0984
30.3	-54.2908	-57.7087	-56.9458
30.4	-54.4434	-57.8613	-57.0374
30.5	-54.3518	-57.8308	-57.0068
30.6	-54.2297	-57.8003	-56.9763
30.7	-54.3518	-57.8003	-57.0984
30.8	-54.4128	-57.8003	-57.0984
30.9	-54.2297	-57.7393	-57.0984
31	-54.2908	-57.7698	-57.0984
31.1	-54.4739	-57.8918	-57.1289
31.2	-54.2602	-57.8003	-57.0374
31.3	-54.4434	-57.9224	-57.0984
31.4	-54.4128	-57.8613	-57.0374
31.5	-54.3823	-57.8308	-57.0679
31.6	-54.3823	-57.8613	-57.0984
31.7	-54.3823	-57.8613	-57.0068
31.8	-54.3213	-57.7698	-57.1899
31.9	-54.3518	-57.8613	-57.0984
32	-54.4434	-57.9529	-57.0984
32.1	-54.4128	-57.8003	-57.1289
32.2	-54.5349	-57.9224	-57.1289
32.3	-54.3823	-57.8613	-56.9763
32.4	-54.4434	-57.8918	-57.0984
32.5	-54.4434	-57.9224	-57.1289
32.6	-54.3518	-57.9224	-57.0679
32.7	-54.4128	-57.7698	-57.1899
32.8	-54.4739	-57.8613	-57.1289
32.9	-54.4739	-57.8613	-57.0679
33	-54.3823	-57.8308	-57.0984
33.1	-54.5654	-58.0444	-57.1594
33.2	-54.3823	-57.8918	-56.9763
33.3	-54.4434	-57.9529	-57.0374
33.4	-54.4434	-57.8918	-57.0984
33.5	-54.4128	-57.9224	-56.9763
33.6	-54.2908	-57.8918	-57.1289
33.7	-54.3823	-57.9834	-57.1289
33.8	-54.3518	-57.9529	-57.0679
33.9	-54.3213	-57.9529	-56.9458
34	-54.4128	-57.9834	-57.0679
34.1	-54.3213	-57.8918	-57.0068
34.2	-54.4434	-58.0139	-57.0984
34.3	-54.3823	-57.9224	-56.9458
34.4	-54.3518	-57.8918	-56.9458
34.5	-54.3518	-57.9529	-57.0374
34.6	-54.3518	-57.9529	-56.9458
34.7	-54.3213	-57.8613	-57.0679
34.8	-54.4128	-57.9529	-57.0068
34.9	-54.5044	-58.0444	-57.0068
35	-54.2297	-57.8613	-56.9458
35.1	-54.3823	-58.0444	-57.0374
35.2	-54.3823	-58.075	-56.8543
35.3	-54.2297	-57.9224	-56.9763
35.4	-54.2908	-58.0139	-57.0374
35.5	-54.4128	-58.0444	-56.9153
35.6	-54.2602	-57.8308	-57.0374
35.7	-54.2602	-58.0139	-56.9458
35.8	-54.4434	-58.0139	-56.9458
35.9	-54.2908	-57.9834	-56.9153
36	-54.2908	-57.9529	-56.9458
36.1	-54.2602	-58.0444	-56.8543
36.2	-54.1992	-57.9529	-56.8848
36.3	-54.1077	-57.9224	-57.0068
36.4	-54.2602	-57.9224	-56.8848
36.5	-54.1687	-57.8918	-57.0374
36.6	-54.2602	-57.9529	-56.9458
36.7	-54.2602	-58.0444	-56.9458
36.8	-54.2297	-57.9529	-56.9458
36.9	-54.3213	-58.0139	-56.9458
37	-54.2602	-57.8918	-56.8543
37.1	-54.2297	-57.9224	-56.9458
37.2	-54.2908	-57.9529	-56.8848
37.3	-54.1992	-57.8918	-56.8237
37.4	-54.2297	-57.8613	-56.9763
37.5	-54.3213	-57.9834	-56.9153
37.6	-54.2297	-57.9529	-56.9763
37.7	-54.2602	-57.8918	-56.9763
37.8	-54.3213	-58.0444	-57.0068
37.9	-54.1687	-57.8918	-56.8848
38	-54.2297	-57.9834	-56.9763
38.1	-54.2297	-57.9224	-56.8848
38.2	-54.1687	-57.9529	-56.9458
38.3	-54.1687	-57.8918	-57.0984
38.4	-54.1992	-57.9529	-56.9763
38.5	-54.2297	-57.9224	-57.0374
38.6	-54.2297	-57.9834	-57.0374
38.7	-54.2908	-58.075	-56.9763
38.8	-54.2297	-57.9529	-56.9458
38.9	-54.3823	-58.1055	-57.0374
39	-54.2908	-58.0444	-56.9763
39.1	-54.2602	-58.0444	-57.0068
39.2	-54.2602	-58.0444	-57.0679
39.3	-54.2602	-58.075	-56.9763
39.4	-54.1992	-57.9529	-57.0984
39.5	-54.2908	-58.075	-57.0068
39.6	-54.4739	-58.075	-57.0679
39.7	-54.1992	-57.9529	-57.0374
39.8	-54.3518	-58.1665	-57.0068
39.9	-54.3213	-58.136	-56.9458
40	-54.2297	-58.0444	-57.0374
40.1	-54.2602	-58.1055	-57.0679
40.2	-54.3518	-58.197	-56.9458
40.3	-54.2602	-57.9834	-57.0984
40.4	-54.2908	-58.1055	-57.0374
40.5	-54.4739	-58.197	-57.0068
40.6	-54.2297	-58.0444	-57.0374
40.7	-54.2908	-58.136	-56.9763
40.8	-54.2602	-58.075	-56.8543
40.9	-54.2297	-58.0444	-56.9153
41	-54.2602	-58.075	-56.9763
41.1	-54.2602	-58.0444	-56.8543
41.2	-54.1687	-57.9834	-56.9458
41.3	-54.2602	-58.0139	-56.8848
41.4	-54.2908	-58.0444	-56.9763
41.5	-54.1992	-58.0444	-56.9153
41.6	-54.3213	-58.136	-56.8848
41.7	-54.1687	-57.9834	-56.8237
41.8	-54.1687	-58.136	-56.8543
41.9	-54.2297	-58.136	-56.8543
42	-54.1687	-58.0139	-56.8543
42.1	-54.1077	-57.9834	-56.9153
42.2	-54.1687	-58.0444	-56.8237
42.3	-54.1687	-57.9834	-56.9458
42.4	-54.1077	-58.0444	-56.8543
42.5	-54.2602	-58.1055	-56.8237
42.6	-54.1077	-57.9224	-56.8543
42.7	-54.1382	-58.0444	-56.8543
42.8	-54.1382	-57.9834	-56.7932
42.9	-54.1382	-57.9834	-56.9153
43	-54.1077	-58.0444	-56.9458
43.1	-54.1382	-58.075	-56.7627
43.2	-54.1687	-57.9834	-56.9763
43.3	-54.1687	-57.9834	-56.9458
43.4	-54.2602	-58.1055	-56.8848
43.5	-54.1687	-57.9224	-56.9153
43.6	-54.2908	-58.075	-56.9763
43.7	-54.1687	-58.075	-56.8237
43.8	-54.1687	-57.9834	-56.9763
43.9	-54.1992	-58.0139	-57.0679
44	-54.2297	-58.0444	-56.8848
44.1	-54.1382	-57.9529	-57.0068
44.2	-54.1992	-58.075	-56.8848
44.3	-54.3518	-58.136	-56.8848
44.4	-54.1382	-57.9529	-56.9458
44.5	-54.2908	-58.075	-56.9458
44.6	-54.2908	-58.0139	-56.8543
44.7	-54.1992	-58.0139	-56.9153
44.8	-54.1687	-58.0444	-56.9458
44.9	-54.2602	-58.136	-56.9458
45	-54.1687	-57.8918	-57.0679
45.1	-54.1992	-58.0444	-56.9458
45.2	-54.3213	-58.0444	-57.0374
45.3	-54.1992	-57.9529	-56.9763
45.4	-54.2908	-58.136	-56.9153
45.5	-54.1687	-58.0139	-56.8543
45.6	-54.2602	-58.0444	-56.9763
45.7	-54.1992	-57.9529	-56.8848
45.8	-54.2297	-58.0139	-56.9763
45.9	-54.1992	-57.9834	-56.9458
46	-54.2602	-58.0444	-56.8543
46.1	-54.2908	-58.075	-56.9458
46.2	-54.2297	-58.075	-57.0068
46.3	-54.4128	-58.136	-56.8848
46.4	-54.2602	-58.0139	-57.0374
46.5	-54.2602	-58.1665	-57.0679
46.6	-54.2602	-58.0444	-56.8848
46.7	-54.2297	-57.9834	-56.9763
46.8	-54.1687	-58.0444	-57.0374
46.9	-54.2908	-58.075	-56.8848
47	-54.2602	-58.0139	-57.0068
47.1	-54.2297	-58.1055	-56.9458
47.2	-54.3518	-58.2275	-56.9153
47.3	-54.1687	-58.0139	-56.9458
47.4	-54.2908	-58.1665	-56.9153
47.5	-54.2602	-58.136	-56.9458
47.6	-54.2297	-58.0444	-56.8848
47.7	-54.1992	-58.075	-56.9458
47.8	-54.2297	-58.1665	-56.8848
47.9	-54.2297	-58.0444	-56.9763
48	-54.2908	-58.0444	-56.8848
48.1	-54.3213	-58.2275	-56.9153
48.2	-54.1992	-58.0444	-56.8848
48.3	-54.3518	-58.1665	-56.7932
48.4	-54.2297	-58.075	-56.8848
48.5	-54.1992	-58.0444	-56.9153
48.6	-54.2297	-58.0444	-56.8543
48.7	-54.2297	-58.075	-56.8543
48.8	-54.1077	-58.0139	-56.9458
48.9	-54.1687	-58.0139	-56.8237
49	-54.2602	-58.075	-56.9153
49.1	-54.0466	-58.0444	-56.9153
49.2	-54.2297	-58.136	-56.8237
49.3	-54.2602	-58.0139	-56.8237
49.4	-54.1687	-58.0444	-56.9153
49.5	-54.1687	-58.0139	-56.8543
49.6	-54.1992	-57.9834	-56.8543
49.7	-54.2297	-57.9224	-57.0679
49.8	-54.1687	-57.9834	-56.9458
49.9	-54.2908	-57.9834	-57.0068
50	-54.1077	-57.9529	-56.9458
50.1	-54.1992	-58.075	-56.8543
50.2	-54.1687	-57.9224	-56.8543
50.3	-54.1382	-57.9529	-56.9458
50.4	-54.1077	-58.0139	-56.9458
50.5	-54.1382	-57.9224	-56.9153
50.6	-54.0772	-57.8918	-57.0068
50.7	-54.1992	-57.9224	-56.9153
50.8	-54.1992	-57.9529	-56.9763
50.9	-54.0772	-58.0139	-56.8848
51	-54.2297	-58.0139	-56.9763
51.1	-54.1687	-57.9224	-56.9458
51.2	-54.1382	-58.0444	-56.8848
51.3	-54.1992	-58.0139	-56.9153
51.4	-54.1382	-57.9834	-56.8848
51.5	-54.1382	-58.0139	-57.0068
51.6	-54.1992	-57.9834	-56.9153
51.7	-54.2602	-57.9224	-57.0679
51.8	-54.1992	-57.9529	-56.9458
51.9	-54.3213	-58.0139	-56.9763
52	-54.2297	-57.9834	-56.9458
52.1	-54.2908	-58.075	-56.9458
52.2	-54.2602	-58.1055	-56.9763
52.3	-54.2297	-57.9224	-57.0374
52.4	-54.2297	-57.9224	-57.0374
52.5	-54.1992	-58.136	-56.9763
52.6	-54.2602	-58.0139	-57.0679
52.7	-54.2602	-58.0139	-56.9458
52.8	-54.2908	-58.075	-57.0068
52.9	-54.2297	-57.9834	-56.9458
53	-54.3518	-57.9834	-56.9763
53.1	-54.2602	-57.9834	-56.9458
53.2	-54.1992	-57.9834	-57.0068
53.3	-54.1687	-58.0139	-56.9458
53.4	-54.3213	-58.0139	-57.0068
53.5	-54.1382	-57.9529	-57.0984
53.6	-54.2908	-57.9834	-57.0374
53.7	-54.2908	-58.1055	-57.0068
53.8	-54.1077	-57.9834	-56.9458
53.9	-54.2297	-58.1055	-56.9763
54	-54.2602	-57.9224	-57.0068
54.1	-54.1992	-58.0444	-56.9458
54.2	-54.1992	-58.0139	-56.9458
54.3	-54.2602	-57.9529	-57.0068
54.4	-54.1382	-58.0139	-57.0374
54.5	-54.1382	-58.0444	-56.9153
54.6	-54.2908	-58.075	-57.0679
54.7	-54.1687	-58.0444	-56.9763
54.8	-54.2908	-58.1665	-56.9763
54.9	-54.1992	-57.9834	-56.8848
55	-54.1382	-58.075	-56.9153
55.1	-54.1687	-58.0444	-56.9458
55.2	-54.1077	-57.9834	-56.9763
55.3	-54.1077	-57.9834	-57.0374
55.4	-54.1992	-58.0444	-56.9458
55.5	-54.2908	-58.0444	-57.0068
55.6	-54.0772	-58.0444	-56.9153
55.7	-54.1992	-58.1055	-57.0068
55.8	-54.0772	-57.9834	-56.9153
55.9	-54.1687	-58.0139	-56.9458
56	-54.1382	-57.9529	-57.0374
56.1	-54.1077	-57.9529	-57.0374
56.2	-54.1077	-58.0139	-57.0068
56.3	-54.0466	-58.0444	-57.0068
56.4	-54.1382	-57.9529	-57.0374
56.5	-54.1077	-57.9529	-56.8848
56.6	-54.1992	-58.075	-57.0374
56.7	-54.1077	-57.9529	-56.9458
56.8	-54.1687	-58.075	-56.8848
56.9	-54.0772	-57.9834	-56.9458
57	-54.0772	-57.9224	-56.9458
57.1	-54.0772	-57.9529	-56.9458
57.2	-54.0772	-57.9224	-56.9153
57.3	-54.0772	-57.8308	-57.0374
57.4	-54.0772	-57.9834	-56.8848
57.5	-54.1992	-58.075	-56.9763
57.6	-54.0161	-57.9529	-56.9153
57.7	-54.1687	-57.9834	-56.9763
57.8	-54.1687	-57.8918	-56.8848
57.9	-54.0161	-57.9834	-56.9763
58	-54.0772	-57.9224	-57.0679
58.1	-54.1687	-57.9529	-56.9763
58.2	-54.0161	-57.9224	-57.0374
58.3	-54.1077	-57.9834	-56.9763
58.4	-54.2297	-58.0139	-57.0068
58.5	-54.0161	-57.9529	-56.9763
58.6	-54.1382	-58.0139	-57.0984
58.7	-54.1687	-57.9529	-57.0374
58.8	-54.0772	-58.075	-57.0068
58.9	-54.1382	-58.0139	-57.1594
59	-54.2297	-57.9834	-57.1289
59.1	-54.1382	-57.9834	-57.0984
59.2	-54.1382	-57.9834	-57.1594
59.3	-54.1687	-58.0444	-57.2205
59.4	-54.0772	-58.0444	-57.0374
59.5	-54.2297	-58.136	-57.2205
59.6	-54.1687	-57.9224	-57.1594
59.7	-54.1687	-58.0444	-57.0374
59.8	-54.1382	-58.1055	-57.1899
59.9	-54.0772	-57.9529	-57.1289
60	-54.0772	-57.9834	-57.1594
60.1	-54.1687	-58.075	-57.0984
60.2	-54.1687	-58.075	-57.1899
60.3	-54.0772	-57.9834	-57.0374
60.4	-54.2297	-58.197	-57.0679
60.5	-54.1382	-58.0139	-57.0984
60.6	-54.1077	-58.136	-57.0679
60.7	-54.1077	-58.136	-57.0984
60.8	-54.0772	-58.0444	-57.0374
60.9	-54.0772	-57.9834	-57.1289
61	-54.1077	-58.0139	-57.0374
61.1	-54.1077	-58.0444	-57.0374
61.2	-54.0466	-58.1055	-57.0374
61.3	-54.1382	-58.1665	-57.0374
61.4	-54.0161	-57.9529	-57.0068
61.5	-54.0772	-58.0444	-57.0984
61.6	-54.0161	-57.9224	-57.0374
61.7	-54.0161	-57.9834	-56.9458
61.8	-54.0466	-58.0139	-57.0984
61.9	-54.0466	-57.9529	-57.0374
62	-53.9551	-57.8918	-57.0374
62.1	-54.0161	-57.8918	-57.0679
62.2	-54.1077	-57.9529	-57.0679
62.3	-53.9246	-57.8613	-56.9153
62.4	-54.1077	-58.0139	-57.0679
62.5	-54.0466	-57.9224	-57.0374
62.6	-53.9246	-57.9529	-56.9763
62.7	-53.9856	-57.8918	-57.0984
62.8	-54.0772	-57.8918	-57.0984
62.9	-53.9856	-57.8613	-57.0068
63	-53.9551	-57.9224	-57.0374
63.1	-54.1077	-57.9834	-57.0984
63.2	-53.9246	-57.9529	-57.0068
63.3	-54.0772	-57.9529	-57.0679
63.4	-54.0772	-57.8003	-57.0374
63.5	-54.0161	-57.8918	-57.0374
63.6	-54.0466	-57.8613	-57.0984
63.7	-54.1077	-57.8308	-57.0679
63.8	-54.0161	-57.8308	-57.1899
63.9	-54.0772	-57.8918	-57.0679
64	-54.1382	-57.8613	-57.0679
64.1	-53.9246	-57.8308	-57.0984
64.2	-54.1382	-58.0139	-57.0984
64.3	-54.0466	-57.8003	-57.0374
64.4	-54.0466	-57.9834	-57.0984
64.5	-54.1382	-57.9529	-57.1899
64.6	-54.1077	-57.8308	-57.0068
64.7	-53.9856	-57.8613	-57.2205
64.8	-54.0772	-57.9224	-57.1594
64.9	-54.1382	-57.8918	-57.1594
65	-53.9856	-57.9224	-57.1594
65.1	-54.1077	-58.0139	-57.1899
65.2	-54.0466	-57.7698	-57.0374
65.3	-54.0466	-57.8613	-57.0679
65.4	-54.0466	-57.8613	-57.1594
65.5	-54.0772	-57.8308	-57.0984
65.6	-54.1077	-57.8003	-57.1899
65.7	-54.1077	-57.8613	-57.1594
65.8	-54.1687	-57.9224	-57.1594
65.9	-54.0772	-57.9224	-57.0679
66	-54.1992	-57.9529	-57.1899
66.1	-54.0772	-57.8918	-57.0374
66.2	-54.2297	-57.9529	-57.1594
66.3	-54.1077	-57.8613	-57.1899
66.4	-54.0466	-57.9529	-57.0679
66.5	-54.1382	-57.9224	-57.2205
66.6	-54.1077	-57.7698	-57.0984
66.7	-54.1382	-57.8918	-57.1594
66.8	-54.1687	-57.9529	-57.1289
66.9	-54.2602	-57.9224	-57.1289
67	-54.0772	-57.8308	-57.1594
67.1	-54.1992	-58.0139	-57.1899
67.2	-54.1992	-57.8613	-57.0679
67.3	-54.0466	-57.9529	-57.0679
67.4	-54.1992	-57.9224	-57.1289
67.5	-54.2602	-57.9224	-57.0374
67.6	-54.1687	-57.8918	-57.1594
67.7	-54.1382	-57.9834	-57.0679
67.8	-54.3213	-58.0139	-57.0374
67.9	-54.1382	-57.8918	-57.0984
68	-54.1992	-58.075	-57.1289
68.1	-54.1687	-57.8308	-57.0068
68.2	-54.1077	-57.9224	-57.0984
68.3	-54.1077	-57.8918	-57.1899
68.4	-54.1992	-57.8003	-57.0984
68.5	-54.1382	-57.8613	-57.2205
68.6	-54.0772	-57.8918	-57.0374
68.7	-54.2297	-57.8003	-57.0374
68.8	-54.0772	-57.8613	-57.0374
68.9	-54.1687	-57.8613	-57.0984
69	-54.0466	-57.8308	-56.9458
69.1	-54.0772	-57.9224	-57.0374
69.2	-54.1077	-57.8613	-57.0374
69.3	-54.1077	-57.7393	-56.9763
69.4	-54.0466	-57.8003	-57.1289
69.5	-54.1382	-57.7698	-57.0068
69.6	-54.1077	-57.7393	-57.0068
69.7	-54.1077	-57.8308	-57.0068
69.8	-54.1687	-57.8308	-57.0679
69.9	-54.1382	-57.7698	-56.9153
70	-54.0772	-57.8003	-56.9763
70.1	-54.0466	-57.7087	-57.0068
70.2	-54.1077	-57.7393	-56.9153
70.3	-54.0466	-57.6782	-57.0679
70.4	-54.0772	-57.7393	-56.9763
70.5	-54.0772	-57.8613	-56.9763
70.6	-54.1382	-57.8003	-57.0374
70.7	-54.0772	-57.8308	-57.0374
70.8	-54.0161	-57.7698	-56.9763
70.9	-54.1077	-57.8308	-56.9763
71	-54.0466	-57.7087	-56.9763
71.1	-54.0772	-57.8003	-57.0679
71.2	-54.1077	-57.7393	-57.1594
71.3	-54.1077	-57.7393	-57.0374
71.4	-54.0772	-57.8003	-57.1594
71.5	-54.1687	-57.8308	-57.0679
71.6	-54.2602	-57.9224	-57.1289
71.7	-54.0772	-57.8003	-57.0984
71.8	-54.1992	-57.9529	-57.0679
71.9	-54.2297	-57.7393	-56.9763
72	-54.1077	-57.8308	-57.0679
72.1	-54.1382	-57.8003	-57.1594
72.2	-54.2297	-57.7698	-57.0374
72.3	-54.1687	-57.7393	-57.1899
72.4	-54.1687	-57.8613	-57.0374
72.5	-54.3518	-57.8308	-57.0068
72.6	-54.1382	-57.8003	-57.0984
72.7	-54.2908	-57.9224	-57.0984
72.8	-54.2297	-57.8003	-56.9153
72.9	-54.1687	-57.8918	-57.0068
73	-54.1687	-57.8613	-57.0679
73.1	-54.2297	-57.8308	-56.9458
73.2	-54.1077	-57.7698	-57.1289
73.3	-54.1687	-57.7698	-57.0679
73.4	-54.3213	-57.8003	-57.0374
73.5	-54.1382	-57.9224	-57.0068
73.6	-54.2602	-57.9529	-57.0374
73.7	-54.0772	-57.8003	-56.8848
73.8	-54.1382	-57.8918	-56.9763
73.9	-54.1382	-57.8308	-57.0679
74	-54.1382	-57.8308	-57.0068
74.1	-54.0772	-57.8308	-57.0679
74.2	-54.1077	-57.8308	-56.9153
74.3	-54.1992	-57.8613	-57.0068
74.4	-54.0466	-57.8308	-56.9458
74.5	-54.1687	-57.8918	-57.0068
74.6	-54.0466	-57.8003	-56.9763
74.7	-54.1077	-57.9224	-56.9458
74.8	-54.1077	-57.8308	-56.8543
74.9	-54.0466	-57.8613	-56.8848
75	-54.0466	-57.8308	-56.9763
75.1	-54.0772	-57.8308	-56.8237
75.2	-54.0772	-57.8918	-57.0374
75.3	-54.0772	-57.8308	-56.9458
75.4	-54.1077	-57.9224	-56.8237
75.5	-53.9551	-57.8918	-56.8543
75.6	-54.0772	-57.9529	-56.9458
75.7	-53.9856	-57.8613	-56.7932
75.8	-53.9856	-57.9529	-56.8848
75.9	-54.0466	-57.8308	-57.0374
76	-54.0772	-57.8003	-56.7627
76.1	-54.0161	-57.8613	-56.8848
76.2	-53.9856	-57.8308	-56.9153
76.3	-54.1382	-57.8308	-56.8237
76.4	-53.9551	-57.8613	-56.8543
76.5	-54.0772	-58.0139	-56.8543
76.6	-54.0772	-57.8308	-56.7627
76.7	-53.9551	-57.8918	-56.7932
76.8	-53.9856	-57.8308	-56.9458
76.9	-54.0772	-57.7393	-56.8543
77	-54.0161	-57.8308	-56.9458
77.1	-53.9856	-57.8918	-56.8237
77.2	-54.1992	-57.8613	-56.8848
77.3	-53.9551	-57.8003	-56.8848
77.4	-54.0772	-57.8918	-56.8237
77.5	-54.1077	-57.7393	-56.8543
77.6	-54.0161	-57.8308	-56.9458
77.7	-54.0466	-57.7393	-56.8848
77.8	-54.0466	-57.8308	-56.8848
77.9	-53.9856	-57.8308	-56.9763
78	-54.1382	-57.8308	-56.8237
78.1	-54.1382	-57.8613	-56.9763
78.2	-53.9856	-57.8003	-56.9763
78.3	-54.1382	-57.9224	-56.8543
78.4	-54.0161	-57.8613	-56.8848
78.5	-54.0466	-57.8918	-56.9763
78.6	-54.0772	-57.7698	-56.9458
78.7	-54.0466	-57.8613	-56.9763
78.8	-53.9856	-57.8003	-57.0374
78.9	-54.0772	-57.8308	-56.9458
79	-54.1687	-57.9529	-56.9153
79.1	-54.0466	-57.9224	-57.0068
79.2	-54.1992	-57.9834	-56.8848
79.3	-54.0466	-57.9834	-56.8237
79.4	-54.0466	-58.0139	-56.9763
79.5	-54.1077	-57.8613	-56.9153
79.6	-54.0772	-57.9834	-56.9458
79.7	-54.0466	-57.9224	-56.9763
79.8	-54.0466	-57.8918	-56.9458
79.9	-54.1077	-57.9834	-56.9458
80	-54.1382	-57.9529	-56.9458
80.1	-54.1687	-58.0139	-56.9458
80.2	-54.0466	-57.9834	-56.8848
80.3	-54.1992	-58.1055	-56.8848
80.4	-54.1382	-57.9529	-56.9153
80.5	-54.0466	-58.0139	-56.9763
80.6	-54.0772	-57.9834	-56.9458
80.7	-54.0466	-57.9529	-56.9153
80.8	-54.0466	-58.0139	-56.9763
80.9	-54.1077	-57.9834	-56.8237
81	-54.1687	-57.9529	-56.9153
81.1	-53.9551	-57.9834	-56.9153
81.2	-54.0772	-58.075	-56.8543
81.3	-54.1077	-57.8308	-56.8848
81.4	-53.9856	-57.9529	-56.9153
81.5	-53.9551	-57.9224	-56.9763
81.6	-54.1077	-57.8918	-56.8543
81.7	-53.9856	-57.9529	-56.9763
81.8	-53.9551	-57.8918	-56.8237
81.9	-54.1077	-57.9224	-56.8848
82	-53.9246	-57.9224	-56.8848
82.1	-54.0161	-58.075	-56.8237
82.2	-54.0772	-57.9224	-56.7627
82.3	-53.9856	-57.9224	-56.9153
82.4	-53.9856	-57.8613	-56.8848
82.5	-53.9856	-57.9224	-56.7932
82.6	-53.9551	-57.8918	-56.8543
82.7	-54.0161	-57.8918	-56.7322
82.8	-54.0466	-58.0139	-56.8848
82.9	-53.894	-57.8613	-56.8543
83	-54.0466	-57.9529	-56.8543
83.1	-53.9246	-57.9529	-56.7932
83.2	-53.9246	-57.9834	-56.8237
83.3	-54.0161	-57.8613	-56.8543
83.4	-53.9856	-57.8918	-56.8848
83.5	-53.894	-57.8918	-56.9458
83.6	-53.9856	-57.8308	-56.8237
83.7	-54.1077	-57.9529	-56.9458
83.8	-53.9856	-57.8613	-56.8237
83.9	-54.0161	-57.8613	-56.7932
84	-53.9246	-57.8918	-56.7627
84.1	-53.894	-57.9529	-56.7627
84.2	-53.9551	-57.8613	-56.7932
84.3	-53.9551	-57.9224	-56.8848
84.4	-53.9856	-57.8918	-56.8543
84.5	-53.9856	-57.8003	-56.7627
84.6	-54.0161	-57.8613	-56.8848
84.7	-53.9856	-57.8918	-56.8237
84.8	-54.0466	-57.9224	-56.9153
84.9	-53.894	-57.8613	-56.8543
85	-54.0466	-57.9834	-56.8237
85.1	-53.9856	-57.8308	-56.7932
85.2	-54.0161	-57.9529	-56.7932
85.3	-53.9246	-57.8308	-56.9153
85.4	-53.9856	-57.8918	-56.9153
85.5	-54.0466	-57.8918	-56.9153
85.6	-54.0161	-57.8918	-56.7932
85.7	-54.1382	-57.8308	-56.9458
85.8	-53.9246	-57.9529	-56.8848
85.9	-54.0161	-57.8613	-56.8543
86	-54.0161	-57.8613	-56.9153
86.1	-53.9856	-57.9529	-56.8848
86.2	-54.0161	-57.9529	-56.9153
86.3	-54.1687	-57.9224	-56.8848
86.4	-53.9856	-57.9529	-56.9458
86.5	-54.0466	-57.9529	-56.7932
86.6	-54.1382	-57.9224	-56.9458
86.7	-54.1077	-57.9224	-56.9153
86.8	-54.1382	-57.9834	-56.8237
86.9	-54.0466	-57.8613	-56.7932
87	-54.0161	-57.9529	-56.8848
87.1	-54.0772	-57.8918	-56.9153
87.2	-54.0772	-57.9529	-56.8237
87.3	-54.0161	-57.8918	-56.9153
87.4	-54.0772	-57.8613	-56.8237
87.5	-54.0772	-58.0139	-56.9458
87.6	-53.9856	-57.9224	-56.8848
87.7	-54.0466	-57.9529	-56.8543
87.8	-54.0772	-57.9224	-56.8543
87.9	-53.9856	-57.9224	-56.8848
88	-54.0161	-57.8918	-56.9458
88.1	-53.9856	-57.9834	-56.8848
88.2	-53.9856	-57.9224	-56.9458
88.3	-54.0161	-57.8613	-56.9763
88.4	-54.1382	-58.0139	-56.9458
88.5	-53.9551	-58.0139	-56.7932
88.6	-54.0466	-57.9224	-56.9153
88.7	-53.9856	-57.8613	-56.9458
88.8	-54.0161	-57.9529	-56.8543
88.9	-53.9246	-57.7698	-56.9458
89	-53.9246	-57.8613	-56.9458
89.1	-53.9856	-57.8613	-56.8543
89.2	-53.9246	-57.7698	-56.8848
89.3	-54.0466	-57.8918	-57.0374
89.4	-53.9551	-57.8918	-56.7932
89.5	-54.0466	-57.8918	-56.9153
89.6	-53.8635	-57.8003	-56.8237
89.7	-54.0466	-57.8918	-56.8237
89.8	-53.9856	-57.7698	-56.8543
89.9	-53.8635	-57.8003	-56.8848
90	-53.9246	-57.8003	-56.9763
90.1	-53.9551	-57.8003	-56.9153
90.2	-53.894	-57.8003	-56.9458
90.3	-53.9246	-57.7393	-56.9153
90.4	-54.0466	-57.8918	-56.9153
90.5	-53.8635	-57.8003	-56.8237
90.6	-53.9246	-57.8003	-56.9458
90.7	-53.894	-57.8003	-56.8848
90.8	-53.894	-57.9224	-56.8848
90.9	-53.894	-57.7393	-57.0374
91	-53.9551	-57.8308	-56.8848
91.1	-53.9551	-57.8308	-56.9153
91.2	-53.894	-57.7087	-56.9458
91.3	-54.0466	-57.8918	-57.0068
91.4	-53.9246	-57.8308	-56.8848
91.5	-54.0772	-57.8613	-57.0068
91.6	-54.0466	-57.8003	-56.9153
91.7	-53.9856	-57.8308	-56.8848
91.8	-54.0466	-57.7698	-57.0374
91.9	-54.0772	-57.8308	-57.0374
92	-53.9551	-57.8308	-57.0679
92.1	-54.0161	-57.7698	-57.0374
92.2	-54.1382	-57.8918	-57.0984
92.3	-54.0161	-57.8308	-56.9458
92.4	-54.1687	-57.8918	-57.0068
92.5	-54.0772	-57.8918	-57.0068
92.6	-54.0161	-57.9224	-56.9458
92.7	-54.0161	-57.8308	-56.9763
92.8	-54.1382	-57.9224	-56.9763
92.9	-54.0772	-57.8003	-57.0068
93	-54.1077	-57.7393	-56.9763
93.1	-54.1382	-57.9529	-57.0374
93.2	-54.0161	-57.8918	-56.9458
93.3	-54.1382	-57.8918	-56.9458
93.4	-54.0772	-57.8613	-56.8848
93.5	-54.1382	-57.8918	-56.9153
93.6	-54.0466	-57.7698	-56.9458
93.7	-54.0772	-57.8918	-56.9153
93.8	-54.0161	-57.9224	-57.0679
93.9	-54.0466	-57.8308	-56.9458
94	-54.1077	-57.9224	-56.8848
94.1	-54.0772	-57.9529	-56.9458
94.2	-54.1687	-57.9224	-56.9763
94.3	-53.9856	-57.8308	-56.8543
94.4	-54.0772	-57.9224	-56.9153
94.5	-54.0772	-57.8308	-56.9153
94.6	-53.9856	-57.8613	-56.8237
94.7	-54.1077	-57.7393	-57.0068
94.8	-54.0772	-57.8613	-56.8848
94.9	-54.0466	-57.8613	-56.9153
95	-54.0161	-57.8308	-56.9153
95.1	-54.1077	-57.9529	-56.9763
95.2	-53.9246	-57.8613	-56.8543
95.3	-54.0466	-57.8613	-56.9458
95.4	-54.0466	-57.8613	-56.8848
95.5	-53.9551	-57.8918	-56.8543
95.6	-53.9246	-57.7698	-56.8848
95.7	-53.9551	-57.8613	-56.9763
95.8	-54.0161	-57.8918	-56.9153
95.9	-54.0466	-57.8003	-56.8848
96	-54.1687	-57.9834	-56.9458
96.1	-53.9856	-57.8613	-56.8543
96.2	-54.1077	-57.8003	-56.9153
96.3	-54.0161	-57.7393	-56.8543
96.4	-53.9856	-57.8003	-56.9153
96.5	-53.9856	-57.7087	-56.9458
96.6	-54.0161	-57.7393	-56.9153
96.7	-53.9551	-57.7698	-56.9153
96.8	-54.0161	-57.7698	-56.9153
96.9	-54.1382	-57.8613	-56.8848
97	-53.9551	-57.7698	-56.8848
97.1	-54.1077	-57.8003	-56.9458
97.2	-54.0772	-57.7393	-56.8237
97.3	-53.9856	-57.8308	-56.8543
97.4	-54.0161	-57.7393	-56.9763
97.5	-54.0772	-57.7393	-56.8237
97.6	-53.9856	-57.7087	-56.9458
97.7	-54.0161	-57.6477	-56.9458
97.8	-54.1382	-57.8003	-56.8543
97.9	-53.9856	-57.7393	-56.8543
98	-54.1077	-57.7087	-56.9458
98.1	-54.0161	-57.7087	-56.8543
98.2	-54.1077	-57.7393	-56.9153
98.3	-54.0161	-57.6477	-56.9763
98.4	-54.0466	-57.7087	-56.8848
98.5	-54.0466	-57.6782	-57.0374
98.6	-54.0161	-57.6782	-56.9763
98.7	-54.1077	-57.8308	-56.9153
98.8	-54.1077	-57.7087	-56.9458
98.9	-54.2602	-57.7393	-56.9458
99	-54.0466	-57.6782	-56.9153
99.1	-54.1687	-57.8003	-57.0068
99.2	-54.1992	-57.7698	-56.9153
99.3	-54.0466	-57.8003	-56.8848
99.4	-54.1077	-57.7087	-57.0679
99.5	-54.1382	-57.8003	-56.9458
99.6	-54.1382	-57.7698	-57.0068
99.7	-54.1077	-57.7393	-57.0068
99.8	-54.2297	-57.8918	-57.0068
99.9	-54.0466	-57.7087	-56.8848
100	-54.1382	-57.8003	-56.9458
100.1	-54.1382	-57.8003	-56.8543
100.2	-54.1382	-57.8003	-56.8848
100.3	-54.1382	-57.6782	-57.0068
100.4	-54.1687	-57.8308	-56.9458
100.5	-54.1687	-57.8003	-57.0068
100.6	-54.1077	-57.7087	-56.8848
100.7	-54.1992	-57.8613	-56.8848
100.8	-54.0466	-57.8308	-56.8848
100.9	-54.1992	-57.7087	-56.8848
101	-54.1382	-57.7698	-56.8237
101.1	-54.0772	-57.9224	-56.8848
101.2	-54.1077	-57.7087	-56.9153
101.3	-54.1382	-57.7087	-56.8237
101.4	-54.0161	-57.7698	-57.0068
101.5	-54.0466	-57.6782	-56.8848
101.6	-54.1687	-57.8308	-56.8543
101.7	-53.9551	-57.7698	-56.8848
101.8	-54.1382	-57.7393	-56.9153
101.9	-54.1687	-57.7393	-56.7627
102	-54.0161	-57.7698	-56.9153
102.1	-54.0161	-57.7087	-56.8848
102.2	-54.0466	-57.8003	-56.7627
102.3	-54.0161	-57.6782	-56.9763
102.4	-53.9856	-57.7087	-56.8543
102.5	-54.0772	-57.7087	-56.8237
102.6	-54.0161	-57.6782	-56.8543
102.7	-54.1077	-57.6477	-56.8543
102.8	-54.0161	-57.7087	-56.8237
102.9	-54.0772	-57.6172	-56.8237
103	-54.0466	-57.7087	-56.9153
103.1	-54.0772	-57.7087	-56.8237
103.2	-54.0161	-57.6172	-56.9458
103.3	-54.0772	-57.7087	-56.9153
103.4	-53.9856	-57.8003	-56.9458
103.5	-54.1077	-57.6172	-56.9153
103.6	-54.1687	-57.7393	-56.8848
103.7	-53.9856	-57.6782	-56.8543
103.8	-54.0772	-57.6477	-56.8543
103.9	-54.1687	-57.6477	-56.8848
104	-54.0772	-57.6782	-56.9763
104.1	-54.1077	-57.6172	-56.9763
104.2	-54.1382	-57.6782	-56.8543
104.3	-54.0466	-57.7087	-56.9458
104.4	-54.0772	-57.6172	-56.8543
104.5	-54.1382	-57.8308	-56.9458
104.6	-54.0466	-57.6782	-56.9153
104.7	-54.1382	-57.7393	-56.9458
104.8	-54.0466	-57.6782	-56.8543
104.9	-53.9856	-57.6782	-56.8848
105	-54.0772	-57.5867	-56.9763
105.1	-54.1077	-57.7393	-56.8543
105.2	-54.0772	-57.7087	-57.0374
105.3	-54.1382	-57.6782	-56.9763
105.4	-54.1382	-57.8308	-56.8848
105.5	-54.0161	-57.7393	-56.9153
105.6	-54.1382	-57.7087	-56.9763
105.7	-54.1077	-57.7393	-56.7932
105.8	-54.0466	-57.8003	-56.9153
105.9	-54.0772	-57.6172	-57.0679
106	-54.1077	-57.7087	-56.8543
106.1	-54.0161	-57.7393	-57.0068
106.2	-54.0466	-57.6782	-56.9153
106.3	-54.1992	-57.8003	-57.0068
106.4	-54.0161	-57.7393	-56.9153
106.5	-54.1382	-57.8003	-56.9153
106.6	-54.1077	-57.7698	-56.9458
106.7	-54.0161	-57.8003	-56.9763
106.8	-54.0161	-57.7698	-57.0068
106.9	-54.1077	-57.7698	-57.0068
107	-54.0466	-57.7393	-57.0374
107.1	-54.0161	-57.8613	-56.8848
107.2	-54.1077	-57.8613	-57.0374
107.3	-53.9856	-57.7698	-56.8848
107.4	-54.0466	-57.8613	-56.9153
107.5	-53.9856	-57.8003	-56.9458
107.6	-54.0161	-57.8003	-56.9763
107.7	-53.9856	-57.7698	-56.8848
107.8	-53.9856	-57.7698	-56.9458
107.9	-53.9856	-57.6782	-57.0984
108	-54.0466	-57.7698	-56.9458
108.1	-54.0161	-57.8308	-57.0374
108.2	-53.9856	-57.6477	-56.9763
108.3	-54.0772	-57.8308	-56.8848
108.4	-53.9246	-57.7698	-56.9153
108.5	-54.0161	-57.7393	-56.9763
108.6	-54.0161	-57.7698	-56.9153
108.7	-53.9246	-57.7698	-56.9763
108.8	-53.9246	-57.6782	-57.0984
108.9	-53.9551	-57.7393	-56.9458
109	-53.9246	-57.8003	-57.0068
109.1	-53.894	-57.7087	-56.9153
109.2	-53.9856	-57.7393	-56.9458
109.3	-53.894	-57.6782	-56.8848
109.4	-53.9551	-57.7698	-56.9153
109.5	-53.894	-57.7393	-56.8848
109.6	-53.8635	-57.7087	-56.8848
109.7	-53.833	-57.6172	-56.9458
109.8	-53.8635	-57.7087	-56.8848
109.9	-53.8635	-57.7087	-57.0374
110	-53.894	-57.6172	-56.8543
110.1	-53.9856	-57.8613	-56.9763
110.2	-53.772	-57.6477	-57.0068
110.3	-53.9246	-57.7087	-56.9153
110.4	-53.894	-57.7087	-56.8848
110.5	-53.772	-57.7393	-56.9458
110.6	-53.8025	-57.5867	-56.9763
110.7	-53.894	-57.7393	-56.9763
110.8	-53.8025	-57.6477	-57.0679
110.9	-53.8635	-57.6477	-56.8848
111	-53.9856	-57.7698	-56.9763
111.1	-53.7415	-57.6477	-57.0374
111.2	-53.894	-57.7698	-56.9458
111.3	-53.894	-57.6477	-56.9153
111.4	-53.833	-57.7393	-57.0679
111.5	-53.8635	-57.7393	-57.0374
111.6	-53.9246	-57.7393	-57.0068
111.7	-53.8635	-57.6477	-57.1899
111.8	-53.8635	-57.7393	-57.0068
111.9	-54.0161	-57.7698	-57.0679
112	-53.9246	-57.6782	-57.0984
112.1	-53.9551	-57.8613	-57.0374
112.2	-53.894	-57.7393	-56.9763
112.3	-54.0466	-57.6782	-57.0374
112.4	-53.9246	-57.7087	-57.0068
112.5	-53.8635	-57.7393	-57.0679
112.6	-53.9246	-57.5867	-57.0068
112.7	-53.9856	-57.7698	-57.0374
112.8	-53.9551	-57.8308	-57.0374
112.9	-53.9551	-57.7087	-57.0068
113	-53.9856	-57.8308	-57.0068
113.1	-53.833	-57.7698	-57.0679
113.2	-53.9856	-57.7393	-56.9763
113.3	-53.9551	-57.8003	-57.0068
113.4	-53.8635	-57.8918	-57.0984
113.5	-53.8635	-57.7087	-57.0374
113.6	-53.9246	-57.7698	-57.0068
113.7	-53.9246	-57.8003	-57.0984
113.8	-53.894	-57.7087	-56.9763
113.9	-53.9551	-57.8613	-57.0374
114	-53.833	-57.8308	-56.9763
114.1	-53.8635	-57.8003	-56.9763
114.2	-53.8635	-57.7698	-56.9458
114.3	-53.8635	-57.8308	-56.9458
114.4	-53.8635	-57.7698	-57.0068
114.5	-53.894	-57.8003	-57.0068
114.6	-53.833	-57.8003	-57.0984
114.7	-53.894	-57.7698	-56.9458
114.8	-54.0161	-57.9224	-56.9763
114.9	-53.833	-57.7698	-56.9763
115	-53.9246	-57.9224	-56.9458
115.1	-53.8635	-57.8613	-56.9763
115.2	-53.772	-57.8003	-56.9153
115.3	-53.8025	-57.7698	-56.9763
115.4	-53.894	-57.8918	-56.9458
115.5	-53.7415	-57.8308	-57.0679
115.6	-53.8635	-57.8003	-56.9153
115.7	-53.9856	-57.9529	-57.0374
115.8	-53.772	-57.8308	-56.9153
115.9	-53.833	-57.9224	-56.8848
116	-53.8635	-57.8308	-56.8848
116.1	-53.8025	-57.8613	-56.8543
116.2	-53.7415	-57.8308	-56.9153
116.3	-53.8025	-57.8613	-56.9458
116.4	-53.833	-57.7698	-56.9763
116.5	-53.8025	-57.8003	-56.8848
116.6	-53.833	-57.8308	-56.9763
116.7	-53.7415	-57.7393	-56.8848
116.8	-53.8635	-57.8918	-56.9153
116.9	-53.7109	-57.7698	-56.8543
117	-53.833	-57.7087	-56.8848
117.1	-53.772	-57.7393	-56.9763
117.2	-53.7109	-57.7087	-56.9763
117.3	-53.772	-57.6172	-57.0068
117.4	-53.8025	-57.7393	-56.9153
117.5	-53.7415	-57.8003	-56.9153
117.6	-53.7415	-57.6477	-56.8848
117.7	-53.894	-57.8613	-56.9763
117.8	-53.7109	-57.8003	-57.0374
117.9	-53.8025	-57.7087	-56.9458
118	-53.833	-57.7698	-57.0068
118.1	-53.7109	-57.7393	-57.0679
118.2	-53.7109	-57.6477	-57.0679
118.3	-53.7415	-57.7698	-57.0679
118.4	-53.772	-57.8918	-57.1289
118.5	-53.7109	-57.7393	-57.0068
118.6	-53.833	-57.8613	-57.1289
118.7	-53.7109	-57.8613	-57.0679
118.8	-53.772	-57.8003	-56.9763
118.9	-53.8025	-57.7698	-57.0374
119	-53.772	-57.8308	-57.0679
119.1	-53.833	-57.7393	-57.0984
119.2	-53.833	-57.8613	-57.0374
119.3	-53.772	-57.8613	-57.1289
119.4	-53.772	-57.8918	-57.0679
119.5	-53.894	-57.8918	-57.0984
119.6	-53.772	-57.8613	-57.0679
119.7	-53.8635	-57.8918	-57.1289
119.8	-53.894	-57.8918	-57.0374
119.9	-53.7415	-57.8003	-57.0068
120	-53.772	-57.9224	-57.0679
120.1	-53.8635	-57.8918	-56.9763
120.2	-53.7109	-57.8308	-57.0374
120.3	-53.8635	-57.8308	-57.0679
120.4	-53.9246	-57.9529	-57.0679
120.5	-53.833	-57.8308	-56.9153
120.6	-53.833	-57.9529	-57.0679
120.7	-53.8635	-57.8308	-56.9458
120.8	-53.772	-57.8308	-56.9153
120.9	-53.7109	-57.7698	-57.0679
121	-53.8025	-57.7698	-57.0374
121.1	-53.8025	-57.7393	-57.0068
121.2	-53.7415	-57.8308	-56.9763
121.3	-53.772	-57.9224	-57.1289
121.4	-53.7109	-57.7393	-56.8848
121.5	-53.772	-57.9224	-57.0068
121.6	-53.6194	-57.8613	-57.0068
121.7	-53.6804	-57.8003	-56.9153
121.8	-53.6804	-57.7698	-57.0374
121.9	-53.6194	-57.7698	-57.0679
122	-53.6804	-57.7393	-57.0374
122.1	-53.6499	-57.8003	-56.9458
122.2	-53.6804	-57.8613	-57.0679
122.3	-53.5889	-57.6782	-56.9458
122.4	-53.772	-57.9224	-56.9458
122.5	-53.6194	-57.8308	-56.9153
122.6	-53.6499	-57.8308	-56.9153
122.7	-53.6194	-57.8613	-56.9763
122.8	-53.5583	-57.8003	-56.9458
122.9	-53.6194	-57.6782	-57.0679
123	-53.6499	-57.8003	-56.9763
123.1	-53.7109	-57.8613	-57.0068
123.2	-53.6499	-57.7393	-57.0679
123.3	-53.7415	-57.8918	-57.0374
123.4	-53.6499	-57.7087	-56.9153
123.5	-53.7415	-57.8003	-57.0068
123.6	-53.6499	-57.7087	-56.9763
123.7	-53.6194	-57.7698	-56.8543
123.8	-53.6499	-57.7393	-57.0679
123.9	-53.7415	-57.7698	-57.0374
124	-53.7109	-57.7393	-57.0068
124.1	-53.772	-57.7698	-57.0068
124.2	-53.894	-57.8308	-57.0984
124.3	-53.6194	-57.7393	-56.9153
124.4	-53.8025	-57.8918	-57.0374
124.5	-53.8025	-57.7698	-57.0679
124.6	-53.6804	-57.7087	-56.9763
124.7	-53.7109	-57.6782	-57.0679
124.8	-53.7415	-57.7393	-57.0068
124.9	-53.6499	-57.6172	-57.0374
125	-53.6499	-57.7393	-57.0068
125.1	-53.833	-57.8003	-57.0679
125.2	-53.6804	-57.5867	-56.9763
125.3	-53.833	-57.8308	-57.0374
125.4	-53.8025	-57.7393	-57.0068
125.5	-53.7415	-57.7698	-57.0068
125.6	-53.6804	-57.8003	-57.1289
125.7	-53.6804	-57.7698	-57.0374
125.8	-53.772	-57.6782	-57.1289
125.9	-53.8025	-57.7393	-57.0068
126	-53.8635	-57.9224	-57.0374
126.1	-53.7415	-57.7698	-57.0374
126.2	-53.772	-57.9224	-57.0374
126.3	-53.7415	-57.8918	-56.9153
126.4	-53.8025	-57.8003	-56.9763
126.5	-53.833	-57.7698	-57.0679
126.6	-53.772	-57.8003	-56.8543
126.7	-53.8025	-57.7393	-57.0679
126.8	-53.833	-57.8308	-56.9763
126.9	-53.833	-57.8613	-56.9458
127	-53.833	-57.7698	-56.9763
127.1	-53.9246	-57.9529	-57.0374
127.2	-53.7415	-57.8003	-56.9153
127.3	-53.8025	-57.8613	-56.9763
127.4	-53.772	-57.8613	-57.0679
127.5	-53.772	-57.8613	-56.9458
127.6	-53.772	-57.7698	-56.9763
127.7	-53.8025	-57.8003	-56.9763
127.8	-53.8635	-57.8308	-56.9458
127.9	-53.8025	-57.7698	-56.9763
128	-53.9246	-57.9529	-57.0374
128.1	-53.833	-57.7698	-56.9153
128.2	-53.9551	-57.8308	-56.9153
128.3	-53.8635	-57.7698	-56.8848
128.4	-53.8025	-57.8003	-56.8848
128.5	-53.8635	-57.7393	-57.0068
128.6	-53.8635	-57.7087	-56.8543
128.7	-53.7415	-57.7087	-56.9153
128.8	-53.833	-57.7698	-56.9763
128.9	-53.9551	-57.8308	-56.8848
129	-53.772	-57.7087	-56.7627
129.1	-53.8635	-57.8308	-56.9153
129.2	-53.833	-57.7393	-56.7932
129.3	-53.7109	-57.7393	-56.8848
129.4	-53.8025	-57.8003	-56.8848
129.5	-53.894	-57.7698	-56.7627
129.6	-53.7415	-57.6477	-56.8237
129.7	-53.7415	-57.7087	-56.8848
129.8	-53.9551	-57.8003	-56.8543
129.9	-53.772	-57.5867	-56.8848
130	-53.8635	-57.7698	-56.8543
130.1	-53.833	-57.7393	-56.8237
130.2	-53.772	-57.6172	-56.8543
130.3	-53.772	-57.6782	-56.9153
130.4	-53.7415	-57.7698	-56.8237
130.5	-53.772	-57.5867	-56.9763
130.6	-53.772	-57.6477	-56.8543
130.7	-53.8635	-57.8308	-56.8848
130.8	-53.833	-57.6477	-56.9458
130.9	-53.9246	-57.7698	-56.9153
131	-53.7415	-57.7393	-56.8543
131.1	-53.833	-57.7698	-56.9763
131.2	-53.8025	-57.7393	-56.9763
131.3	-53.8025	-57.7087	-56.8543
131.4	-53.833	-57.6477	-57.0068
131.5	-53.833	-57.6782	-56.9458
131.6	-53.894	-57.7087	-56.9153
131.7	-53.833	-57.7087	-56.9458
131.8	-53.9246	-57.8308	-56.9153
131.9	-53.8025	-57.6782	-56.8848
132	-53.894	-57.7393	-57.0068
132.1	-53.894	-57.7698	-57.0068
132.2	-53.894	-57.7698	-56.9153
132.3	-53.8635	-57.7087	-57.0679
132.4	-53.894	-57.8003	-56.9458
132.5	-53.9551	-57.7393	-57.0068
132.6	-53.9856	-57.7087	-56.9458
132.7	-54.0772	-57.8308	-56.9458
132.8	-53.9551	-57.6782	-56.8237
132.9	-53.9856	-57.7698	-56.9458
133	-53.9246	-57.7698	-56.8848
133.1	-53.833	-57.7087	-56.9153
133.2	-53.9551	-57.7393	-56.9458
133.3	-53.9551	-57.7393	-56.8543
133.4	-53.894	-57.7393	-57.0068
133.5	-53.8635	-57.7087	-56.9458
133.6	-54.0466	-57.8918	-56.8848
133.7	-53.8635	-57.6782	-56.8543
133.8	-53.9856	-57.8308	-56.8543
133.9	-53.9856	-57.7393	-56.7627
134	-53.8635	-57.6782	-56.9153
134.1	-53.9246	-57.7393	-56.9763
134.2	-53.9551	-57.7393	-56.7627
134.3	-53.8635	-57.6477	-56.9763
134.4	-53.833	-57.7087	-56.9153
134.5	-54.0161	-57.8613	-56.8543
134.6	-53.8635	-57.6782	-56.8848
134.7	-53.894	-57.8613	-56.8848
134.8	-53.894	-57.7698	-56.7017
134.9	-53.8635	-57.6477	-56.7932
135	-53.894	-57.7393	-56.8237
135.1	-53.9246	-57.7698	-56.7017
135.2	-53.894	-57.6172	-56.9153
135.3	-53.833	-57.7393	-56.8237
135.4	-53.8635	-57.8613	-56.8543
135.5	-53.8025	-57.7698	-56.7627
135.6	-53.9551	-57.7698	-56.7932
135.7	-53.8635	-57.8003	-56.7627
135.8	-53.894	-57.7698	-56.7932
135.9	-53.833	-57.7087	-56.7932
136	-53.8025	-57.6782	-56.7627
136.1	-53.8635	-57.6782	-56.8237
136.2	-53.894	-57.6477	-56.7322
136.3	-53.8635	-57.6782	-56.8543
136.4	-53.9246	-57.7393	-56.7322
136.5	-53.9551	-57.6477	-56.7322
136.6	-53.8635	-57.5562	-56.7322
136.7	-53.8635	-57.6782	-56.7322
136.8	-53.8025	-57.6477	-56.7322
136.9	-53.833	-57.6172	-56.7627
137	-53.894	-57.6172	-56.9153
137.1	-53.894	-57.6782	-56.7017
137.2	-53.833	-57.6172	-56.8237
137.3	-53.9246	-57.6477	-56.8237
137.4	-53.8635	-57.6782	-56.7322
137.5	-53.7415	-57.5256	-56.7932
137.6	-53.8635	-57.6477	-56.8543
137.7	-53.8635	-57.6782	-56.7322
137.8	-53.833	-57.5867	-56.7932
137.9	-53.833	-57.5562	-56.8848
138	-53.9246	-57.7087	-56.7322
138.1	-53.8635	-57.6477	-56.8848
138.2	-53.894	-57.6477	-56.8237
138.3	-54.0161	-57.7698	-56.8237
138.4	-53.833	-57.6172	-56.7627
138.5	-53.9551	-57.7393	-56.8237
138.6	-54.0161	-57.7393	-56.7932
138.7	-53.894	-57.7087	-56.8237
138.8	-53.894	-57.6782	-56.8848
138.9	-53.9246	-57.7393	-56.8237
139	-53.9246	-57.7087	-56.9458
139.1	-53.894	-57.7698	-56.7932
139.2	-54.1077	-57.8308	-56.8848
139.3	-53.9246	-57.6477	-56.8543
139.4	-53.9551	-57.8308	-56.8543
139.5	-53.894	-57.7698	-56.8848
139.6	-53.9246	-57.7698	-56.8848
139.7	-53.9856	-57.7698	-56.8543
139.8	-53.9856	-57.7087	-56.8543
139.9	-54.0161	-57.6782	-56.9153
140	-53.9856	-57.7393	-56.7627
140.1	-54.0161	-57.8308	-56.9153
140.2	-53.894	-57.6782	-56.8848
140.3	-54.0161	-57.8003	-56.8237
140.4	-53.894	-57.7698	-56.7932
140.5	-53.9856	-57.7393	-56.8848
140.6	-54.0161	-57.7393	-56.8543
140.7	-53.9551	-57.7087	-56.7932
140.8	-53.9551	-57.6477	-57.0068
140.9	-53.9856	-57.6782	-56.7932
141	-54.0466	-57.7087	-56.8848
141.1	-53.9551	-57.7087	-56.8543
141.2	-54.0161	-57.7087	-56.7932
141.3	-53.9551	-57.6477	-56.7322
141.4	-53.9856	-57.7393	-56.7627
141.5	-53.9246	-57.7087	-56.7627
141.6	-53.9246	-57.5867	-56.7017
141.7	-53.8635	-57.5867	-56.8237
141.8	-53.8635	-57.6172	-56.7627
141.9	-53.9246	-57.6172	-56.8543
142	-53.894	-57.7087	-56.7017
142.1	-53.9246	-57.8003	-56.7322
142.2	-53.833	-57.5562	-56.7017
142.3	-53.9551	-57.6782	-56.6711
142.4	-53.9551	-57.6782	-56.7322
142.5	-53.894	-57.5867	-56.7627
142.6	-53.894	-57.5562	-56.7627
142.7	-53.894	-57.6782	-56.7627
142.8	-53.8635	-57.6172	-56.8543
142.9	-53.9246	-57.6172	-56.7322
143	-54.1077	-57.7393	-56.7932
143.1	-53.833	-57.5256	-56.7932
143.2	-53.9551	-57.6477	-56.7627
143.3	-54.0466	-57.6172	-56.7627
143.4	-53.8635	-57.6172	-56.7932
143.5	-53.894	-57.5256	-56.7932
143.6	-53.9246	-57.5256	-56.7322
143.7	-53.8635	-57.5256	-56.8848
143.8	-53.8635	-57.5867	-56.7627
143.9	-54.0161	-57.6477	-56.8237
144	-53.894	-57.4341	-56.8237
144.1	-54.0161	-57.6172	-56.7627
144.2	-53.9856	-57.5256	-56.8237
144.3	-53.9551	-57.5867	-56.8543
144.4	-53.9856	-57.6172	-56.8237
144.5	-53.9246	-57.4951	-56.7932
144.6	-53.9551	-57.4341	-56.8543
144.7	-54.0161	-57.5562	-56.7627
144.8	-53.9856	-57.5867	-56.8848
144.9	-53.9246	-57.4951	-56.8237
145	-54.0772	-57.6172	-56.8237
145.1	-53.8635	-57.4951	-56.8237
145.2	-53.9246	-57.5562	-56.8237
145.3	-53.9551	-57.4951	-56.7932
145.4	-53.9551	-57.5256	-56.8543
145.5	-53.9551	-57.5256	-56.8543
145.6	-54.0466	-57.5256	-56.8543
145.7	-54.0772	-57.5562	-56.8848
145.8	-53.894	-57.4951	-56.7627
145.9	-54.0161	-57.5867	-56.7627
146	-53.894	-57.4646	-56.6711
146.1	-53.9856	-57.6172	-56.7932
146.2	-53.9551	-57.5562	-56.8237
146.3	-53.9246	-57.5867	-56.8543
146.4	-53.9856	-57.6172	-56.7932
146.5	-53.9246	-57.6172	-56.8237
146.6	-53.9551	-57.5867	-56.8237
146.7	-54.0161	-57.5562	-56.7932
146.8	-54.0772	-57.7393	-56.8237
146.9	-53.8635	-57.5562	-56.7932
147	-54.0161	-57.7087	-56.7627
147.1	-53.9856	-57.6477	-56.7932
147.2	-53.9246	-57.4951	-56.8543
147.3	-53.9246	-57.5562	-56.8848
147.4	-53.9246	-57.6477	-56.8848
147.5	-53.9551	-57.5256	-56.9153
147.6	-53.9551	-57.5562	-56.7627
147.7	-54.1382	-57.6782	-56.8848
147.8	-53.9246	-57.4646	-56.8848
147.9	-54.0161	-57.5562	-56.7932
148	-54.0772	-57.5256	-56.8543
148.1	-53.894	-57.5562	-56.7627
148.2	-53.9246	-57.4951	-56.8237
148.3	-54.0161	-57.4951	-56.8237
148.4	-54.0161	-57.5256	-56.9153
148.5	-53.9856	-57.4341	-56.7322
148.6	-54.0772	-57.5256	-56.8543
148.7	-53.894	-57.4341	-56.7627
148.8	-54.0161	-57.5867	-56.7627
148.9	-53.9551	-57.4036	-56.7017
149	-53.9246	-57.4951	-56.7017
149.1	-53.8635	-57.4341	-56.7932
149.2	-53.8635	-57.4036	-56.7017
149.3	-53.9246	-57.4341	-56.7932
149.4	-53.8635	-57.4646	-56.7322
149.5	-53.9551	-57.4341	-56.7322
149.6	-53.8025	-57.4036	-56.6711
149.7	-53.9856	-57.4951	-56.7627
149.8	-53.894	-57.373	-56.7017
149.9	-53.8635	-57.4341	-56.6711
150	-53.8635	-57.4951	-56.7932
150.1	-53.8635	-57.4341	-56.7322
150.2	-53.894	-57.4341	-56.7932
150.3	-53.9246	-57.4036	-56.7932
150.4	-53.9856	-57.4036	-56.8543
150.5	-53.8635	-57.3425	-56.7017
150.6	-53.9856	-57.5256	-56.8237
150.7	-53.894	-57.4341	-56.7932
150.8	-53.9246	-57.4341	-56.7017
150.9	-53.894	-57.4341	-56.8237
151	-53.9246	-57.373	-56.8543
151.1	-53.9856	-57.373	-56.8848
151.2	-53.9551	-57.4951	-56.8543
151.3	-54.0161	-57.4646	-56.9763
151.4	-53.9856	-57.4341	-56.7932
151.5	-54.0466	-57.5256	-56.8848
151.6	-53.9246	-57.373	-56.8237
151.7	-54.0466	-57.4951	-56.8848
151.8	-53.9856	-57.4646	-56.8543
151.9	-53.9856	-57.4646	-56.8848
152	-54.0161	-57.373	-57.0068
152.1	-54.0161	-57.4646	-56.8848
152.2	-54.0466	-57.3425	-56.9153
152.3	-54.0161	-57.4341	-56.9153
152.4	-54.1992	-57.5256	-56.9153
152.5	-53.9856	-57.5256	-56.7932
152.6	-54.0466	-57.5256	-56.9153
152.7	-54.0466	-57.4951	-56.8237
152.8	-54.0161	-57.4036	-56.7627
152.9	-54.0466	-57.373	-56.9763
153	-54.1077	-57.4341	-56.8237
153.1	-54.0161	-57.4646	-56.8543
153.2	-54.0772	-57.4341	-56.8543
153.3	-54.0772	-57.4951	-56.9153
153.4	-54.0466	-57.5256	-56.7932
153.5	-54.0772	-57.5562	-56.9153
153.6	-54.0161	-57.4036	-56.8848
153.7	-54.0466	-57.5256	-56.7322
153.8	-54.1077	-57.4646	-56.8237
153.9	-54.0161	-57.4341	-56.8543
154	-54.0466	-57.4646	-56.8543
154.1	-54.1077	-57.4341	-56.8237
154.2	-54.0161	-57.4341	-56.9153
154.3	-53.9551	-57.4646	-56.7627
154.4	-54.0161	-57.4646	-56.7627
154.5	-54.0161	-57.373	-56.8237
154.6	-54.0466	-57.4646	-56.8237
154.7	-54.0161	-57.4951	-56.8543
154.8	-54.0161	-57.4036	-56.7932
154.9	-54.0466	-57.4646	-56.8237
155	-54.0466	-57.4951	-56.7322
155.1	-54.0772	-57.4951	-56.7627
155.2	-53.9856	-57.4036	-56.7932
155.3	-54.0772	-57.5867	-56.8543
155.4	-54.0466	-57.4341	-56.6711
155.5	-54.1077	-57.4951	-56.7322
155.6	-53.9551	-57.4646	-56.7932
155.7	-53.894	-57.4036	-56.7017
155.8	-54.0161	-57.4036	-56.8543
155.9	-53.9551	-57.4036	-56.7627
156	-54.0466	-57.4646	-56.7322
156.1	-54.0161	-57.4341	-56.7627
156.2	-54.0466	-57.4951	-56.7932
156.3	-53.894	-57.3425	-56.6406
156.4	-54.0161	-57.373	-56.7322
156.5	-54.0466	-57.312	-56.7627
156.6	-53.9551	-57.373	-56.6711
156.7	-53.9551	-57.4036	-56.8543
156.8	-54.0161	-57.4036	-56.7932
156.9	-53.894	-57.4036	-56.7627
157	-53.9551	-57.373	-56.7017
157.1	-54.1382	-57.4646	-56.7932
157.2	-53.9551	-57.3425	-56.6711
157.3	-54.0466	-57.4341	-56.7322
157.4	-54.0772	-57.373	-56.7322
157.5	-53.9246	-57.373	-56.7322
157.6	-53.9246	-57.3425	-56.8237
157.7	-54.0466	-57.3425	-56.7322
157.8	-53.9551	-57.3425	-56.7322
157.9	-53.9246	-57.312	-56.6711
158	-54.0161	-57.4646	-56.7627
158.1	-53.9246	-57.3425	-56.7322
158.2	-54.0466	-57.4036	-56.7932
158.3	-53.9246	-57.312	-56.6406
158.4	-53.894	-57.4646	-56.7017
158.5	-53.9551	-57.4036	-56.8543
158.6	-53.9246	-57.3425	-56.6711
158.7	-53.9856	-57.4341	-56.8543
158.8	-53.9856	-57.4341	-56.7627
158.9	-54.0466	-57.4646	-56.7627
159	-53.9551	-57.4341	-56.7627
159.1	-54.0772	-57.5562	-56.7932
159.2	-53.9551	-57.3425	-56.6406
159.3	-53.9551	-57.4951	-56.7322
159.4	-53.9551	-57.4951	-56.8237
159.5	-53.9856	-57.4341	-56.7627
159.6	-53.9856	-57.4036	-56.8543
159.7	-53.9551	-57.5562	-56.7627
159.8	-54.0161	-57.4951	-56.7322
159.9	-54.0161	-57.4951	-56.7627
160	-54.0466	-57.6172	-56.8237
160.1	-53.9856	-57.4036	-56.7017
160.2	-54.0466	-57.4951	-56.7932
160.3	-53.9856	-57.4951	-56.7932
160.4	-53.9551	-57.4646	-56.7017
160.5	-54.0466	-57.4036	-56.8237
160.6	-53.9551	-57.4341	-56.7017
160.7	-53.9856	-57.4646	-56.6711
160.8	-53.9856	-57.4341	-56.7322
160.9	-54.1077	-57.4951	-56.6711
161	-53.9551	-57.4341	-56.6101
161.1	-53.9856	-57.4951	-56.6711
161.2	-53.9856	-57.4036	-56.6406
161.3	-53.9246	-57.4646	-56.6711
161.4	-53.9856	-57.4036	-56.7932
161.5	-54.0161	-57.312	-56.6406
161.6	-53.9551	-57.4341	-56.6101
161.7	-53.9246	-57.4646	-56.6406
161.8	-54.0772	-57.4951	-56.6406
161.9	-53.8635	-57.4341	-56.6101
162	-53.9856	-57.4341	-56.6711
162.1	-53.9856	-57.3425	-56.5491
162.2	-53.894	-57.4646	-56.5796
162.3	-53.8635	-57.4341	-56.6711
162.4	-53.9551	-57.4036	-56.6711
162.5	-53.9246	-57.373	-56.6711
162.6	-53.9246	-57.3425	-56.6406
162.7	-53.9551	-57.4341	-56.6406
162.8	-53.833	-57.4341	-56.6101
162.9	-53.9856	-57.4951	-56.6406
163	-53.894	-57.4036	-56.6406
163.1	-53.833	-57.4951	-56.6711
163.2	-53.8635	-57.4341	-56.6711
163.3	-53.894	-57.373	-56.5796
163.4	-53.894	-57.4341	-56.6406
163.5	-53.9551	-57.4341	-56.6406
163.6	-53.9551	-57.4036	-56.5796
163.7	-53.8635	-57.4036	-56.6711
163.8	-54.0466	-57.5256	-56.7017
163.9	-54.0161	-57.312	-56.5185
164	-53.9246	-57.4341	-56.6101
164.1	-53.894	-57.4036	-56.6711
164.2	-53.9246	-57.2815	-56.6406
164.3	-53.9246	-57.373	-56.7322
164.4	-53.9246	-57.4341	-56.6406
164.5	-54.0466	-57.4036	-56.5796
164.6	-53.9246	-57.3425	-56.5491
164.7	-53.9856	-57.4646	-56.6406
164.8	-53.8635	-57.3425	-56.5796
164.9	-54.0161	-57.4646	-56.6101
165	-53.9246	-57.3425	-56.7322
165.1	-53.9246	-57.4036	-56.5796
165.2	-53.9551	-57.3425	-56.7017
165.3	-53.9551	-57.3425	-56.6406
165.4	-53.9246	-57.4646	-56.7322
165.5	-53.9856	-57.373	-56.6711
165.6	-54.1077	-57.4341	-56.6101
165.7	-53.894	-57.4036	-56.6101
165.8	-54.0466	-57.4646	-56.6101
165.9	-54.0466	-57.3425	-56.6101
166	-53.9246	-57.4951	-56.7017
166.1	-53.9551	-57.373	-56.7322
166.2	-54.0466	-57.312	-56.6101
166.3	-54.0161	-57.4951	-56.7627
166.4	-53.9551	-57.4341	-56.6711
166.5	-54.1077	-57.4951	-56.6406
166.6	-53.9246	-57.373	-56.6406
166.7	-53.9856	-57.4951	-56.7017
166.8	-54.0466	-57.312	-56.5796
166.9	-53.9856	-57.4036	-56.6711
167	-53.9856	-57.4036	-56.8237
167.1	-54.0466	-57.373	-56.6101
167.2	-54.1077	-57.4341	-56.7627
167.3	-54.1077	-57.4646	-56.7322
167.4	-54.1992	-57.4951	-56.6711
167.5	-54.0466	-57.4036	-56.6711
167.6	-54.1382	-57.4951	-56.7322
167.7	-54.0772	-57.4341	-56.6101
167.8	-54.0466	-57.4951	-56.6406
167.9	-54.1077	-57.4951	-56.7627
168	-54.1077	-57.373	-56.6711
168.1	-54.1077	-57.4036	-56.7932
168.2	-54.0772	-57.4036	-56.6711
168.3	-54.1382	-57.4646	-56.7017
168.4	-53.9856	-57.4036	-56.6406
168.5	-54.1992	-57.4341	-56.5796
168.6	-54.1077	-57.4036	-56.5185
168.7	-54.0466	-57.4341	-56.5491
168.8	-53.9856	-57.2815	-56.6406
168.9	-54.0161	-57.312	-56.6711
169	-54.0772	-57.2815	-56.6711
169.1	-54.0161	-57.3425	-56.5185
169.2	-54.0772	-57.2815	-56.6101
169.3	-54.0772	-57.373	-56.6101
169.4	-54.1077	-57.3425	-56.488
169.5	-54.0161	-57.2815	-56.5491
169.6	-54.0466	-57.312	-56.5796
169.7	-53.9551	-57.3425	-56.5796
169.8	-54.0161	-57.312	-56.5491
169.9	-54.0772	-57.1899	-56.7017
170	-54.0161	-57.312	-56.488
170.1	-53.9551	-57.4036	-56.6406
170.2	-54.1077	-57.312	-56.7017
170.3	-54.1382	-57.373	-56.5796
170.4	-53.9856	-57.312	-56.5491
170.5	-54.0772	-57.373	-56.6406
170.6	-54.0772	-57.2815	-56.6406
170.7	-54.0161	-57.373	-56.6406
170.8	-54.0772	-57.2815	-56.7322
170.9	-54.0772	-57.251	-56.6101
171	-54.0161	-57.4036	-56.7017
171.1	-54.0772	-57.373	-56.6406
171.2	-54.1687	-57.373	-56.7017
171.3	-54.0161	-57.312	-56.6711
171.4	-54.1077	-57.4951	-56.6711
171.5	-54.1077	-57.3425	-56.6711
171.6	-54.0772	-57.4036	-56.6406
171.7	-54.1077	-57.4036	-56.6711
171.8	-54.1687	-57.2815	-56.6711
171.9	-54.1382	-57.3425	-56.7932
172	-54.2297	-57.373	-56.6406
172.1	-54.2297	-57.373	-56.7322
172.2	-54.1382	-57.3425	-56.7017
172.3	-54.2602	-57.4036	-56.5796
172.4	-54.1382	-57.2815	-56.6101
172.5	-54.1077	-57.3425	-56.7017
172.6	-54.1382	-57.3425	-56.7017
172.7	-54.1382	-57.3425	-56.6406
172.8	-54.1992	-57.3425	-56.7627
172.9	-54.2297	-57.373	-56.6101
173	-54.3213	-57.4036	-56.6711
173.1	-54.1077	-57.3425	-56.7322
173.2	-54.1992	-57.3425	-56.6406
173.3	-54.1992	-57.312	-56.5796
173.4	-54.2297	-57.4341	-56.6406
173.5	-54.1687	-57.2815	-56.5796
173.6	-54.1992	-57.312	-56.6101
173.7	-54.1992	-57.312	-56.7322
173.8	-54.1382	-57.2815	-56.6101
173.9	-54.1687	-57.4341	-56.7017
174	-54.1992	-57.4036	-56.6711
174.1	-54.2297	-57.4036	-56.6101
174.2	-54.1077	-57.3425	-56.6101
174.3	-54.1992	-57.4341	-56.5796
174.4	-54.1077	-57.312	-56.6711
174.5	-54.0772	-57.3425	-56.6406
174.6	-54.1382	-57.312	-56.6711
174.7	-54.1687	-57.312	-56.5185
174.8	-54.1687	-57.4036	-56.6406
174.9	-54.1077	-57.3425	-56.5185
175	-54.2602	-57.4036	-56.6101
175.1	-54.0772	-57.312	-56.5796
175.2	-54.1992	-57.373	-56.488
175.3	-54.2297	-57.251	-56.5796
175.4	-54.1382	-57.3425	-56.6406
175.5	-54.1687	-57.2815	-56.7322
175.6	-54.1992	-57.2815	-56.6101
175.7	-54.1687	-57.4036	-56.7017
175.8	-54.1077	-57.373	-56.5796
175.9	-54.2602	-57.3425	-56.5796
176	-54.1382	-57.312	-56.5796
176.1	-54.2297	-57.4036	-56.5185
176.2	-54.1382	-57.251	-56.6101
176.3	-54.0772	-57.312	-56.6101
176.4	-54.1687	-57.2205	-56.6406
176.5	-54.1687	-57.1594	-56.6101
176.6	-54.1382	-57.251	-56.7322
176.7	-54.1382	-57.2815	-56.5796
176.8	-54.2602	-57.3425	-56.6406
176.9	-54.0772	-57.251	-56.6101
177	-54.1382	-57.3425	-56.5491
177.1	-54.1382	-57.2205	-56.6406
177.2	-54.0772	-57.2815	-56.6406
177.3	-54.1077	-57.1899	-56.6711
177.4	-54.1382	-57.2205	-56.6711
177.5	-54.1077	-57.251	-56.6406
177.6	-54.1077	-57.1899	-56.5796
177.7	-54.2297	-57.312	-56.7017
177.8	-54.0161	-57.2205	-56.5491
177.9	-54.0772	-57.251	-56.6101
178	-54.0466	-57.2815	-56.6406
178.1	-54.1077	-57.312	-56.6101
178.2	-54.0772	-57.1594	-56.6711
178.3	-54.1077	-57.2815	-56.6406
178.4	-54.1077	-57.251	-56.7017
178.5	-54.0161	-57.1899	-56.6711
178.6	-54.1077	-57.2815	-56.7322
178.7	-54.0772	-57.251	-56.6711
178.8	-54.1077	-57.312	-56.6406
178.9	-54.0161	-57.312	-56.5796
179	-54.1992	-57.4036	-56.7017
179.1	-54.0772	-57.2205	-56.7017
179.2	-53.9246	-57.251	-56.7017
179.3	-54.0161	-57.312	-56.6406
179.4	-54.1077	-57.2815	-56.7017
179.5	-54.1077	-57.3425	-56.7017
179.6	-54.1382	-57.312	-56.6711
179.7	-54.2297	-57.373	-56.7322
179.8	-54.0466	-57.3425	-56.7322
179.9	-54.1382	-57.4341	-56.6711
180	-54.1687	-57.312	-56.7322
180.1	-54.0772	-57.373	-56.6711
180.2	-54.0772	-57.312	-56.6406
180.3	-54.1687	-57.312	-56.6406
180.4	-54.1382	-57.4036	-56.7627
180.5	-54.0772	-57.373	-56.5491
180.6	-54.2297	-57.373	-56.6406
180.7	-54.0161	-57.4036	-56.5796
180.8	-54.1077	-57.4341	-56.5185
180.9	-54.1687	-57.312	-56.6101
181	-54.0772	-57.4036	-56.5796
181.1	-54.1077	-57.312	-56.6101
181.2	-54.0772	-57.2815	-56.5796
181.3	-54.0772	-57.373	-56.6101
181.4	-54.0772	-57.312	-56.5185
181.5	-54.1687	-57.373	-56.5185
181.6	-54.0161	-57.2815	-56.4575
181.7	-54.1687	-57.373	-56.5185
181.8	-54.1077	-57.312	-56.5185
181.9	-54.0161	-57.4036	-56.4575
182	-53.9856	-57.251	-56.5796
182.1	-53.9856	-57.251	-56.4575
182.2	-53.9551	-57.2815	-56.5185
182.3	-53.9856	-57.312	-56.4575
182.4	-54.1077	-57.4646	-56.5185
182.5	-53.9246	-57.2815	-56.4575
182.6	-54.0161	-57.3425	-56.5185
182.7	-53.9551	-57.3425	-56.488
182.8	-54.0161	-57.2815	-56.4575
182.9	-53.9856	-57.1899	-56.5796
183	-53.9246	-57.312	-56.5491
183.1	-53.9856	-57.251	-56.4575
183.2	-53.9551	-57.251	-56.488
183.3	-54.0466	-57.373	-56.6406
183.4	-54.0161	-57.2815	-56.488
183.5	-54.0772	-57.2815	-56.5796
183.6	-53.9246	-57.312	-56.5185
183.7	-54.1077	-57.4036	-56.488
183.8	-54.0772	-57.251	-56.5796
183.9	-53.9551	-57.312	-56.5491
184	-53.9856	-57.2815	-56.6101
184.1	-54.0466	-57.1594	-56.5185
184.2	-53.9856	-57.2815	-56.5796
184.3	-53.9856	-57.312	-56.4575
184.4	-54.0772	-57.312	-56.4575
184.5	-53.9551	-57.251	-56.4575
184.6	-54.0772	-57.3425	-56.5185
184.7	-54.1077	-57.251	-56.5491
184.8	-54.0161	-57.2815	-56.5185
184.9	-54.0466	-57.2205	-56.6406
185	-54.1687	-57.251	-56.5491
185.1	-54.1687	-57.3425	-56.5185
185.2	-54.1077	-57.1899	-56.5796
185.3	-54.1687	-57.312	-56.5796
185.4	-54.0466	-57.373	-56.427
185.5	-54.1077	-57.312	-56.5185
185.6	-54.1077	-57.2815	-56.5796
185.7	-54.0772	-57.312	-56.4575
185.8	-54.0772	-57.1899	-56.6711
185.9	-54.1077	-57.312	-56.6406
186	-54.1382	-57.312	-56.5796
186.1	-54.1687	-57.3425	-56.5796
186.2	-54.2908	-57.2815	-56.6406
186.3	-54.1687	-57.373	-56.5185
186.4	-54.2602	-57.312	-56.6101
186.5	-54.1382	-57.3425	-56.6101
186.6	-54.0466	-57.373	-56.4575
186.7	-54.0161	-57.373	-56.5796
186.8	-54.1382	-57.4036	-56.5796
186.9	-53.9856	-57.4646	-56.6101
187	-54.1382	-57.312	-56.5796
187.1	-54.1077	-57.4341	-56.6406
187.2	-54.1077	-57.312	-56.5491
187.3	-54.1077	-57.4036	-56.5796
187.4	-54.1077	-57.373	-56.488
187.5	-54.1687	-57.4036	-56.5796
187.6	-54.1077	-57.312	-56.6101
187.7	-54.1077	-57.4341	-56.488
187.8	-54.1992	-57.4341	-56.6406
187.9	-54.1382	-57.312	-56.5491
188	-54.1687	-57.4951	-56.5491
188.1	-54.1382	-57.4036	-56.5491
188.2	-54.1992	-57.4341	-56.5796
188.3	-54.0466	-57.4036	-56.4575
188.4	-54.1382	-57.4341	-56.488
188.5	-54.1382	-57.2815	-56.5796
188.6	-54.0772	-57.4341	-56.427
188.7	-54.1382	-57.3425	-56.6101
188.8	-54.1382	-57.251	-56.5491
188.9	-54.0772	-57.3425	-56.5796
189	-54.0466	-57.373	-56.427
189.1	-54.1382	-57.373	-56.488
189.2	-54.0161	-57.312	-56.427
189.3	-54.0772	-57.4036	-56.4575
189.4	-54.0772	-57.2815	-56.488
189.5	-54.0161	-57.2815	-56.427
189.6	-54.0466	-57.251	-56.5796
189.7	-54.0772	-57.251	-56.5185
189.8	-54.1077	-57.312	-56.4575
189.9	-54.0466	-57.312	-56.4575
190	-54.1687	-57.4036	-56.5185
190.1	-54.0161	-57.312	-56.427
190.2	-54.1382	-57.2815	-56.488
190.3	-54.0772	-57.251	-56.427
190.4	-54.0161	-57.312	-56.427
190.5	-54.0466	-57.1899	-56.6406
190.6	-54.1077	-57.312	-56.5185
190.7	-54.0466	-57.3425	-56.5491
190.8	-54.0466	-57.1899	-56.5796
190.9	-54.1382	-57.373	-56.488
191	-54.0161	-57.3425	-56.5185
191.1	-54.1382	-57.373	-56.6406
191.2	-54.1077	-57.312	-56.488
191.3	-54.0161	-57.3425	-56.5185
191.4	-54.0466	-57.1899	-56.6711
191.5	-54.1077	-57.312	-56.5491
191.6	-54.1077	-57.373	-56.6101
191.7	-54.1077	-57.3425	-56.6101
191.8	-54.1992	-57.4341	-56.5491
191.9	-54.1382	-57.373	-56.5185
192	-54.2297	-57.373	-56.5796
192.1	-54.1382	-57.3425	-56.5185
192.2	-54.2602	-57.4036	-56.5185
192.3	-54.1382	-57.312	-56.6101
192.4	-54.0772	-57.373	-56.5185
192.5	-54.2602	-57.3425	-56.6406
192.6	-54.1992	-57.251	-56.6101
192.7	-54.2297	-57.4036	-56.5796
192.8	-54.2297	-57.4036	-56.5796
192.9	-54.2908	-57.4341	-56.6101
193	-54.1382	-57.4646	-56.5185
193.1	-54.2602	-57.4951	-56.6406
193.2	-54.1992	-57.312	-56.6711
193.3	-54.1382	-57.4341	-56.5185
193.4	-54.1687	-57.4036	-56.6711
193.5	-54.2602	-57.3425	-56.5491
193.6	-54.2297	-57.4951	-56.5491
193.7	-54.1382	-57.3425	-56.5796
193.8	-54.2908	-57.4036	-56.6406
193.9	-54.1382	-57.373	-56.5185
194	-54.2602	-57.4646	-56.5796
194.1	-54.2602	-57.3425	-56.6101
194.2	-54.2297	-57.4036	-56.5185
194.3	-54.2602	-57.312	-56.6406
194.4	-54.2602	-57.312	-56.6101
194.5	-54.1992	-57.312	-56.6101
194.6	-54.1687	-57.312	-56.5796
194.7	-54.2908	-57.4951	-56.5185
194.8	-54.1382	-57.3425	-56.5491
194.9	-54.2908	-57.373	-56.5796
195	-54.2297	-57.4341	-56.5491
195.1	-54.1382	-57.373	-56.5491
195.2	-54.1992	-57.2815	-56.6101
195.3	-54.2908	-57.4036	-56.488
195.4	-54.2297	-57.312	-56.6406
195.5	-54.2908	-57.2815	-56.5796
195.6	-54.3213	-57.4036	-56.5185
195.7	-54.1382	-57.3425	-56.5185
195.8	-54.2908	-57.3425	-56.5796
195.9	-54.2602	-57.373	-56.3965
196	-54.1992	-57.4341	-56.5796
196.1	-54.1992	-57.2205	-56.6101
196.2	-54.1382	-57.312	-56.5185
196.3	-54.1992	-57.3425	-56.5796
196.4	-54.1687	-57.2815	-56.6406
196.5	-54.3213	-57.4341	-56.5185
196.6	-54.2297	-57.4036	-56.6101
196.7	-54.2602	-57.373	-56.6406
196.8	-54.1382	-57.251	-56.4575
196.9	-54.1992	-57.312	-56.5796
197	-54.1687	-57.251	-56.6406
197.1	-54.1382	-57.312	-56.488
197.2	-54.2297	-57.2815	-56.6406
197.3	-54.1687	-57.2205	-56.6406
197.4	-54.1992	-57.373	-56.6101
197.5	-54.1687	-57.251	-56.5796
197.6	-54.2602	-57.312	-56.5796
197.7	-54.1077	-57.2815	-56.5185
197.8	-54.2297	-57.312	-56.5796
197.9	-54.1687	-57.312	-56.6101
198	-54.0772	-57.312	-56.6101
198.1	-54.1382	-57.251	-56.6711
198.2	-54.1687	-57.2205	-56.5491
198.3	-54.2602	-57.4036	-56.6711
198.4	-54.1992	-57.2815	-56.6406
198.5	-54.3518	-57.3425	-56.6406
198.6	-54.1687	-57.2815	-56.6406
198.7	-54.2297	-57.3425	-56.6406
198.8	-54.1687	-57.373	-56.6101
198.9	-54.1687	-57.4036	-56.6406
199	-54.2602	-57.251	-56.7932
199.1	-54.2297	-57.3425	-56.6406
199.2	-54.2297	-57.4341	-56.7322
199.3	-54.1687	-57.312	-56.7322
199.4	-54.2908	-57.4646	-56.6406
199.5	-54.1077	-57.3425	-56.6711
199.6	-54.2908	-57.4036	-56.7932
199.7	-54.1992	-57.4036	-56.6711
199.8	-54.1687	-57.373	-56.7322
[truncated: 58,001 more rows]

## Sheet:  A ii
ACSF	CsCl
13.42	0.73
10.41	6.2
17.85	0.43
24.05	8
