# Supplementary material for: The cation channel mechanisms of subthreshold inward depolarizing currents in the mice VTA dopaminergic neurons and their roles in the chronic-stress-induced depression-like behavior
Source: eLife. 2024 Dec 6;12:RP88319. doi: 10.7554/eLife.88319 (PMC11623934; doi:10.7554/eLife.88319)
Supplement: Figure 2—figure supplement 3—source data 2. [file elife-88319-fig2-figsupp3-data2.xlsx]

## Sheet:  B i
time	ACSF	ZD7288	ACSF
0	-50.2472	-53.1158	-59.7687
0.1	-50.1862	-53.1158	-59.7229
0.2	-50.2625	-53.1158	-59.7534
0.3	-50.2472	-53.1311	-59.7076
0.4	-50.2472	-53.0395	-59.7076
0.5	-50.2014	-53.0701	-59.7382
0.6	-50.1404	-53.1158	-59.7076
0.7	-50.2472	-53.1158	-59.7229
0.8	-50.2472	-53.0853	-59.7382
0.9	-50.1862	-53.0701	-59.7229
1	-50.1709	-53.0243	-59.7382
1.1	-50.1556	-53.1006	-59.7382
1.2	-50.1404	-53.1006	-59.7229
1.3	-50.1862	-53.0701	-59.7534
1.4	-50.1556	-53.0853	-59.7382
1.5	-50.1556	-53.0548	-59.7534
1.6	-50.1099	-53.1006	-59.7839
1.7	-50.1099	-53.1311	-59.7534
1.8	-50.1862	-53.1311	-59.7382
1.9	-50.1556	-53.0853	-59.7534
2	-50.1251	-53.1006	-59.6771
2.1	-50.0793	-53.0548	-59.7382
2.2	-50.1099	-53.1158	-59.7076
2.3	-50.1251	-53.1616	-59.7076
2.4	-50.1862	-53.1006	-59.7229
2.5	-50.1862	-53.1158	-59.7229
2.6	-50.1556	-53.0701	-59.7534
2.7	-50.1862	-53.1311	-59.7687
2.8	-50.1556	-53.1616	-59.7534
2.9	-50.2472	-53.1921	-59.7534
3	-50.2167	-53.1921	-59.8297
3.1	-50.2167	-53.1921	-59.7839
3.2	-50.2014	-53.1464	-59.8145
3.3	-50.1862	-53.1616	-59.7992
3.4	-50.2014	-53.2532	-59.8297
3.5	-50.2625	-53.2379	-59.906
3.6	-50.2777	-53.2532	-59.8755
3.7	-50.2472	-53.2684	-59.8907
3.8	-50.2319	-53.2532	-59.8907
3.9	-50.2167	-53.2379	-59.9213
4	-50.2777	-53.2532	-59.906
4.1	-50.293	-53.2837	-59.967
4.2	-50.3082	-53.3142	-59.9213
4.3	-50.3235	-53.2684	-59.9823
4.4	-50.293	-53.2532	-59.9976
4.5	-50.2472	-53.2379	-59.9823
4.6	-50.2777	-53.2532	-60.0128
4.7	-50.3235	-53.2837	-59.9823
4.8	-50.3235	-53.2989	-59.967
4.9	-50.354	-53.2989	-59.9365
5	-50.3082	-53.2684	-59.9518
5.1	-50.3235	-53.2684	-59.967
5.2	-50.3082	-53.2227	-60.0128
5.3	-50.293	-53.2379	-59.9823
5.4	-50.3845	-53.2532	-59.9518
5.5	-50.3845	-53.2532	-59.9365
5.6	-50.3845	-53.2837	-59.906
5.7	-50.354	-53.2074	-59.9823
5.8	-50.3387	-53.1921	-59.9823
5.9	-50.2777	-53.1464	-59.9365
6	-50.3082	-53.1311	-59.906
6.1	-50.3235	-53.1616	-59.9518
6.2	-50.3387	-53.1616	-59.967
6.3	-50.3693	-53.1769	-59.967
6.4	-50.3235	-53.1769	-59.906
6.5	-50.3387	-53.1921	-59.906
6.6	-50.293	-53.1616	-59.967
6.7	-50.293	-53.1616	-59.9518
6.8	-50.3387	-53.1006	-59.967
6.9	-50.3693	-53.1464	-59.906
7	-50.354	-53.1921	-59.9518
7.1	-50.3693	-53.1769	-59.9823
7.2	-50.354	-53.1769	-59.9976
7.3	-50.3235	-53.1616	-59.9976
7.4	-50.354	-53.1464	-59.967
7.5	-50.3082	-53.1158	-59.9976
7.6	-50.3693	-53.1311	-60.0281
7.7	-50.3998	-53.1158	-60.0586
7.8	-50.3998	-53.1616	-59.967
7.9	-50.3998	-53.1921	-59.967
8	-50.3845	-53.1769	-59.9823
8.1	-50.3693	-53.2074	-60.0128
8.2	-50.3845	-53.1769	-60.0128
8.3	-50.3845	-53.1769	-59.9518
8.4	-50.3693	-53.1311	-59.9213
8.5	-50.4456	-53.1464	-59.9518
8.6	-50.4303	-53.1006	-59.967
8.7	-50.4761	-53.1616	-59.9518
8.8	-50.4608	-53.1769	-59.9823
8.9	-50.4303	-53.2227	-59.9213
9	-50.4913	-53.2227	-59.9213
9.1	-50.4608	-53.2227	-59.9976
9.2	-50.4608	-53.2532	-59.9823
9.3	-50.4608	-53.2379	-59.9823
9.4	-50.4761	-53.2379	-59.9365
9.5	-50.4913	-53.2074	-59.9365
9.6	-50.5676	-53.2227	-59.9518
9.7	-50.5371	-53.2532	-59.967
9.8	-50.5371	-53.2837	-59.9976
9.9	-50.5524	-53.3447	-60.0128
10	-50.5066	-53.3447	-59.9823
10.1	-50.5524	-53.36	-59.967
10.2	-50.4913	-53.3905	-60.0433
10.3	-50.4913	-53.3752	-60.0433
10.4	-50.5066	-53.3752	-60.0891
10.5	-50.5219	-53.3752	-60.0891
10.6	-50.5219	-53.3752	-60.0739
10.7	-50.5676	-53.36	-60.0586
10.8	-50.5676	-53.3752	-60.0891
10.9	-50.5829	-53.36	-60.1196
11	-50.6134	-53.3752	-60.1349
11.1	-50.5981	-53.3905	-60.1654
11.2	-50.6439	-53.4058	-60.1196
11.3	-50.6287	-53.4058	-60.1501
11.4	-50.6134	-53.4363	-60.1196
11.5	-50.6287	-53.421	-60.1654
11.6	-50.6439	-53.421	-60.2112
11.7	-50.6287	-53.421	-60.2264
11.8	-50.6744	-53.421	-60.2264
11.9	-50.7202	-53.3905	-60.1654
12	-50.6744	-53.36	-60.1807
12.1	-50.7355	-53.3447	-60.1654
12.2	-50.7202	-53.2837	-60.2264
12.3	-50.7507	-53.3142	-60.1959
12.4	-50.7202	-53.2837	-60.2112
12.5	-50.7202	-53.3295	-60.1501
12.6	-50.7507	-53.3295	-60.1349
12.7	-50.705	-53.3447	-60.1196
12.8	-50.6897	-53.36	-60.0891
12.9	-50.6897	-53.3752	-60.1349
13	-50.6744	-53.3752	-60.1196
13.1	-50.6287	-53.36	-60.1044
13.2	-50.6744	-53.36	-60.0891
13.3	-50.6134	-53.3447	-60.0433
13.4	-50.6592	-53.36	-59.9976
13.5	-50.6744	-53.36	-60.0128
13.6	-50.6897	-53.3447	-59.9976
13.7	-50.705	-53.3447	-60.0433
13.8	-50.705	-53.3447	-60.0281
13.9	-50.705	-53.3447	-59.9976
14	-50.7202	-53.3142	-59.9976
14.1	-50.705	-53.3142	-59.9518
14.2	-50.6897	-53.3142	-59.9518
14.3	-50.705	-53.36	-59.9213
14.4	-50.6744	-53.3447	-59.9365
14.5	-50.6897	-53.2989	-59.967
14.6	-50.6897	-53.3295	-59.9823
14.7	-50.6439	-53.3142	-59.9823
14.8	-50.6439	-53.3295	-59.967
14.9	-50.6439	-53.2989	-59.9976
15	-50.6287	-53.3142	-59.9518
15.1	-50.6592	-53.3142	-59.967
15.2	-50.6287	-53.3295	-59.967
15.3	-50.6134	-53.3447	-60.0128
15.4	-50.6287	-53.3447	-60.0281
15.5	-50.6439	-53.3752	-60.0586
15.6	-50.6134	-53.3752	-60.0433
15.7	-50.6592	-53.4058	-60.0739
15.8	-50.6439	-53.3752	-60.0586
15.9	-50.6744	-53.421	-60.0586
16	-50.6592	-53.421	-60.0433
16.1	-50.6592	-53.4515	-60.0281
16.2	-50.6744	-53.4363	-60.0433
16.3	-50.6744	-53.4515	-60.0739
16.4	-50.6744	-53.4668	-60.0891
16.5	-50.705	-53.4515	-60.1044
16.6	-50.7202	-53.4668	-60.1196
16.7	-50.7202	-53.4363	-60.1501
16.8	-50.7812	-53.4668	-60.1349
16.9	-50.7507	-53.4058	-60.1196
17	-50.766	-53.421	-60.1044
17.1	-50.7812	-53.421	-60.1044
17.2	-50.7965	-53.4515	-60.0891
17.3	-50.8118	-53.4363	-60.1196
17.4	-50.8118	-53.4515	-60.1349
17.5	-50.827	-53.4363	-60.1501
17.6	-50.8423	-53.3752	-60.2112
17.7	-50.827	-53.4058	-60.2112
17.8	-50.7812	-53.421	-60.2417
17.9	-50.827	-53.4515	-60.1807
18	-50.8423	-53.3752	-60.1959
18.1	-50.8881	-53.3905	-60.1807
18.2	-50.9033	-53.421	-60.1807
18.3	-50.8575	-53.4363	-60.1349
18.4	-50.8423	-53.421	-60.1501
18.5	-50.8575	-53.36	-60.1501
18.6	-50.9033	-53.4058	-60.1501
18.7	-50.9033	-53.4058	-60.2264
18.8	-50.8728	-53.421	-60.1959
18.9	-50.8423	-53.4058	-60.2417
19	-50.9338	-53.3905	-60.257
19.1	-50.9186	-53.4363	-60.257
19.2	-50.9033	-53.4668	-60.2875
19.3	-50.8881	-53.4821	-60.2722
19.4	-50.9033	-53.4058	-60.257
19.5	-50.9491	-53.4058	-60.2417
19.6	-50.9186	-53.4058	-60.2417
19.7	-50.9033	-53.4973	-60.2264
19.8	-50.9186	-53.4363	-60.2264
19.9	-50.9796	-53.3905	-60.1959
20	-50.9338	-53.3752	-60.2112
20.1	-50.9491	-53.3905	-60.1654
20.2	-50.8881	-53.4515	-60.1501
20.3	-50.9338	-53.4058	-60.1654
20.4	-50.9644	-53.4058	-60.1501
20.5	-50.9338	-53.3905	-60.1349
20.6	-50.9033	-53.3752	-60.1349
20.7	-50.9033	-53.421	-60.1501
20.8	-50.9338	-53.4058	-60.0891
20.9	-50.9338	-53.36	-60.1349
21	-50.9338	-53.3447	-60.0891
21.1	-50.9033	-53.36	-60.1044
21.2	-50.9033	-53.4058	-60.0891
21.3	-50.9491	-53.3905	-60.0586
21.4	-50.9186	-53.3752	-60.0586
21.5	-50.9338	-53.36	-60.0281
21.6	-50.9033	-53.3447	-60.0281
21.7	-50.9033	-53.36	-60.0128
21.8	-50.9186	-53.3905	-59.9976
21.9	-50.9338	-53.4058	-59.9365
22	-50.9491	-53.3752	-59.9518
22.1	-50.9338	-53.36	-59.9365
22.2	-50.9186	-53.36	-59.967
22.3	-50.9796	-53.36	-59.9213
22.4	-51.0254	-53.4515	-59.906
22.5	-50.9949	-53.4363	-59.9213
22.6	-50.9949	-53.4363	-59.9213
22.7	-50.9491	-53.4363	-59.906
22.8	-50.9949	-53.421	-59.906
22.9	-51.0254	-53.4363	-59.906
23	-51.0406	-53.4821	-59.8755
23.1	-51.0406	-53.5126	-59.8907
23.2	-50.9949	-53.5126	-59.845
23.3	-51.0254	-53.5126	-59.8755
23.4	-51.0559	-53.4668	-59.906
23.5	-51.1017	-53.4821	-59.845
23.6	-51.1169	-53.5126	-59.906
23.7	-51.1169	-53.5583	-59.8602
23.8	-51.1169	-53.5583	-59.8602
23.9	-51.1169	-53.5583	-59.8755
24	-51.1932	-53.5583	-59.8602
24.1	-51.2238	-53.5126	-59.845
24.2	-51.1932	-53.5736	-59.8602
24.3	-51.178	-53.6041	-59.8755
24.4	-51.1475	-53.6346	-59.8755
24.5	-51.178	-53.6194	-59.8602
24.6	-51.239	-53.6499	-59.8145
24.7	-51.2238	-53.6194	-59.845
24.8	-51.2543	-53.5889	-59.7992
24.9	-51.2238	-53.6194	-59.7534
25	-51.2085	-53.6346	-59.7534
25.1	-51.2238	-53.6957	-59.7382
25.2	-51.2238	-53.6804	-59.7687
25.3	-51.2695	-53.6499	-59.7839
25.4	-51.2543	-53.6346	-59.7839
25.5	-51.2695	-53.6346	-59.7382
25.6	-51.2085	-53.6194	-59.7229
25.7	-51.178	-53.6804	-59.7382
25.8	-51.1932	-53.6957	-59.7992
25.9	-51.239	-53.6957	-59.7687
26	-51.2695	-53.7415	-59.7229
26.1	-51.2085	-53.6652	-59.7534
26.2	-51.2238	-53.6804	-59.8145
26.3	-51.1932	-53.6499	-59.7992
26.4	-51.1627	-53.6804	-59.7992
26.5	-51.1475	-53.7109	-59.7229
26.6	-51.1932	-53.7262	-59.7382
26.7	-51.2085	-53.7567	-59.7839
26.8	-51.2085	-53.772	-59.7534
26.9	-51.178	-53.7872	-59.7229
27	-51.1322	-53.772	-59.7534
27.1	-51.1322	-53.772	-59.7534
27.2	-51.1169	-53.7415	-59.7992
27.3	-51.178	-53.772	-59.7382
27.4	-51.178	-53.8177	-59.6619
27.5	-51.178	-53.8177	-59.7229
27.6	-51.178	-53.8788	-59.7382
27.7	-51.178	-53.8635	-59.7076
27.8	-51.1322	-53.8788	-59.6924
27.9	-51.1017	-53.9093	-59.6619
28	-51.1322	-53.8788	-59.6924
28.1	-51.1475	-53.8635	-59.7229
28.2	-51.178	-53.8788	-59.6466
28.3	-51.1322	-53.8788	-59.6466
28.4	-51.1627	-53.9093	-59.6008
28.5	-51.1322	-53.9398	-59.6313
28.6	-51.1017	-53.9551	-59.6466
28.7	-51.1017	-53.9856	-59.6008
28.8	-51.0864	-54.0008	-59.5551
28.9	-51.1475	-53.9856	-59.5398
29	-51.1475	-53.9856	-59.5856
29.1	-51.178	-53.9703	-59.5856
29.2	-51.1475	-53.9398	-59.6008
29.3	-51.1627	-53.9856	-59.494
29.4	-51.1322	-53.9856	-59.5398
29.5	-51.1627	-53.9856	-59.5551
29.6	-51.1322	-54.0466	-59.5551
29.7	-51.1017	-54.0314	-59.6008
29.8	-51.1627	-54.0772	-59.5703
29.9	-51.1627	-54.0619	-59.5245
30	-51.2085	-54.0619	-59.5398
30.1	-51.2238	-54.0924	-59.5856
30.2	-51.239	-54.1077	-59.6161
30.3	-51.1932	-54.0772	-59.6619
30.4	-51.1932	-54.0772	-59.6008
30.5	-51.178	-54.0619	-59.6313
30.6	-51.1932	-54.0619	-59.6466
30.7	-51.1475	-54.1229	-59.6771
30.8	-51.178	-54.0772	-59.7534
30.9	-51.2085	-54.1382	-59.7382
31	-51.239	-54.1382	-59.7076
31.1	-51.2543	-54.184	-59.7229
31.2	-51.2848	-54.1992	-59.7382
31.3	-51.2848	-54.1992	-59.7534
31.4	-51.2695	-54.2145	-59.8297
31.5	-51.3	-54.2297	-59.7992
31.6	-51.2695	-54.2602	-59.8145
31.7	-51.2695	-54.2297	-59.845
31.8	-51.2238	-54.2602	-59.7992
31.9	-51.2238	-54.2145	-59.8755
32	-51.239	-54.2145	-59.906
32.1	-51.2238	-54.1687	-59.8907
32.2	-51.2695	-54.1534	-59.8907
32.3	-51.3	-54.1534	-59.845
32.4	-51.3306	-54.184	-59.7992
32.5	-51.3306	-54.1992	-59.8755
32.6	-51.3458	-54.2145	-59.8755
32.7	-51.3458	-54.245	-59.906
32.8	-51.3306	-54.1992	-59.8907
32.9	-51.3458	-54.2602	-59.845
33	-51.2695	-54.1992	-59.845
33.1	-51.3	-54.2297	-59.8602
33.2	-51.2543	-54.245	-59.8297
33.3	-51.2238	-54.2145	-59.906
33.4	-51.239	-54.2602	-59.9213
33.5	-51.239	-54.2145	-59.8602
33.6	-51.2695	-54.2297	-59.8602
33.7	-51.2543	-54.2145	-59.7992
33.8	-51.3	-54.2297	-59.7687
33.9	-51.2848	-54.184	-59.845
34	-51.3153	-54.2145	-59.8145
34.1	-51.2695	-54.2145	-59.845
34.2	-51.2848	-54.1992	-59.8297
34.3	-51.3	-54.245	-59.7839
34.4	-51.2848	-54.184	-59.7839
34.5	-51.3153	-54.2297	-59.7687
34.6	-51.2848	-54.2297	-59.7229
34.7	-51.3153	-54.1992	-59.7687
34.8	-51.3153	-54.2145	-59.7992
34.9	-51.3306	-54.2602	-59.7687
35	-51.2848	-54.2297	-59.7839
35.1	-51.3	-54.306	-59.7229
35.2	-51.2848	-54.3213	-59.7076
35.3	-51.2695	-54.2755	-59.6924
35.4	-51.3	-54.3366	-59.6161
35.5	-51.2848	-54.306	-59.6619
35.6	-51.3306	-54.306	-59.6771
35.7	-51.3153	-54.306	-59.6619
35.8	-51.3458	-54.2908	-59.6619
35.9	-51.3306	-54.3518	-59.6619
36	-51.3611	-54.3671	-59.6008
36.1	-51.3611	-54.3671	-59.6313
36.2	-51.3763	-54.3976	-59.5856
36.3	-51.3916	-54.4281	-59.5703
36.4	-51.3763	-54.4128	-59.6161
36.5	-51.3916	-54.4586	-59.6008
36.6	-51.3763	-54.4434	-59.6466
36.7	-51.4069	-54.4434	-59.6771
36.8	-51.3763	-54.4586	-59.6466
36.9	-51.4069	-54.4434	-59.6161
37	-51.4069	-54.4281	-59.6161
37.1	-51.4069	-54.4281	-59.5398
37.2	-51.4069	-54.4128	-59.5398
37.3	-51.4069	-54.5196	-59.5093
37.4	-51.4221	-54.5044	-59.5093
37.5	-51.3763	-54.4891	-59.5703
37.6	-51.3763	-54.5044	-59.5245
37.7	-51.3611	-54.4739	-59.5703
37.8	-51.3611	-54.5044	-59.6008
37.9	-51.3916	-54.5502	-59.5398
38	-51.3916	-54.5044	-59.5551
38.1	-51.4069	-54.4586	-59.5703
38.2	-51.3763	-54.4891	-59.5093
38.3	-51.3306	-54.4891	-59.494
38.4	-51.3763	-54.5044	-59.494
38.5	-51.4374	-54.4891	-59.4482
38.6	-51.4374	-54.4128	-59.4635
38.7	-51.4069	-54.5349	-59.4482
38.8	-51.3306	-54.5502	-59.494
38.9	-51.3916	-54.4891	-59.494
39	-51.4221	-54.4891	-59.4482
39.1	-51.3763	-54.4586	-59.4788
39.2	-51.3763	-54.5196	-59.494
39.3	-51.3306	-54.5196	-59.4635
39.4	-51.4221	-54.4586	-59.4635
39.5	-51.4069	-54.4434	-59.4635
39.6	-51.3916	-54.5044	-59.3872
39.7	-51.3153	-54.5044	-59.4177
39.8	-51.3916	-54.5196	-59.3567
39.9	-51.4221	-54.5196	-59.3719
40	-51.3763	-54.4586	-59.3719
40.1	-51.3611	-54.5807	-59.3719
40.2	-51.3458	-54.5807	-59.3872
40.3	-51.4069	-54.5807	-59.4177
40.4	-51.3763	-54.5502	-59.3872
40.5	-51.3763	-54.4891	-59.3567
40.6	-51.3153	-54.5349	-59.3872
40.7	-51.3306	-54.5807	-59.2957
40.8	-51.3763	-54.5502	-59.3262
40.9	-51.3763	-54.5502	-59.2651
41	-51.3763	-54.5502	-59.2499
41.1	-51.3153	-54.5196	-59.2651
41.2	-51.3458	-54.6112	-59.2041
41.3	-51.3916	-54.596	-59.2041
41.4	-51.3916	-54.6112	-59.1888
41.5	-51.3458	-54.596	-59.1431
41.6	-51.3458	-54.5502	-59.1431
41.7	-51.3153	-54.6265	-59.1736
41.8	-51.3611	-54.657	-59.1125
41.9	-51.3611	-54.6417	-59.1278
42	-51.3306	-54.6417	-59.1431
42.1	-51.3611	-54.6722	-59.1278
42.2	-51.2848	-54.6265	-59.1583
42.3	-51.3458	-54.7485	-59.1431
42.4	-51.3611	-54.7485	-59.1583
42.5	-51.4069	-54.7485	-59.1736
42.6	-51.3916	-54.8096	-59.1583
42.7	-51.3763	-54.779	-59.1736
42.8	-51.3763	-54.8096	-59.2041
42.9	-51.4069	-54.8706	-59.1583
43	-51.4679	-54.8706	-59.1888
43.1	-51.4526	-54.9011	-59.2041
43.2	-51.4679	-54.9316	-59.1431
43.3	-51.4374	-54.8554	-59.1583
43.4	-51.4526	-54.9011	-59.1431
43.5	-51.4832	-54.9164	-59.1583
43.6	-51.5289	-54.9316	-59.1583
43.7	-51.5442	-55.0232	-59.1278
43.8	-51.5289	-54.9622	-59.1583
43.9	-51.5442	-54.9469	-59.1736
44	-51.5137	-54.9316	-59.1583
44.1	-51.5442	-54.9622	-59.1431
44.2	-51.5442	-55.0079	-59.1736
44.3	-51.6052	-55.069	-59.1431
44.4	-51.5747	-55.0537	-59.1583
44.5	-51.5747	-55.0842	-59.1125
44.6	-51.5594	-55.0842	-59.1278
44.7	-51.5594	-55.0079	-59.1431
44.8	-51.6205	-55.069	-59.1736
44.9	-51.6052	-55.069	-59.2194
45	-51.6205	-55.0995	-59.2041
45.1	-51.5747	-55.0995	-59.2041
45.2	-51.5747	-55.0537	-59.1888
45.3	-51.5289	-55.0232	-59.1736
45.4	-51.5594	-55.0384	-59.1431
45.5	-51.59	-55.0384	-59.2041
45.6	-51.59	-55.0842	-59.1888
45.7	-51.6205	-55.1453	-59.1431
45.8	-51.5594	-55.0842	-59.1278
45.9	-51.5747	-55.13	-59.1278
46	-51.5442	-55.0995	-59.1431
46.1	-51.5594	-55.0537	-59.1431
46.2	-51.5747	-55.069	-59.0973
46.3	-51.6205	-55.0537	-59.0515
46.4	-51.5747	-55.0842	-59.1278
46.5	-51.5747	-55.1148	-59.082
46.6	-51.5747	-55.0842	-59.0668
46.7	-51.5442	-55.0842	-59.0057
46.8	-51.5747	-55.0995	-59.0057
46.9	-51.5747	-55.0079	-59.0515
47	-51.6205	-55.0079	-59.021
47.1	-51.651	-55.0232	-58.9905
47.2	-51.6052	-55.0079	-58.9905
47.3	-51.59	-55.069	-59.0057
47.4	-51.59	-55.0842	-58.9905
47.5	-51.5594	-55.069	-58.9752
47.6	-51.6052	-55.069	-58.9294
47.7	-51.6357	-55.0537	-58.8989
47.8	-51.651	-55.0384	-58.9752
47.9	-51.6663	-55.0537	-58.9294
48	-51.6968	-54.9774	-58.9294
48.1	-51.6968	-55.0537	-58.8684
48.2	-51.712	-55.0842	-58.8531
48.3	-51.651	-55.069	-58.9142
48.4	-51.6357	-55.1148	-58.8989
48.5	-51.6815	-55.0842	-58.8837
48.6	-51.712	-55.0995	-58.8531
48.7	-51.712	-55.1148	-58.8226
48.8	-51.7426	-55.069	-58.8684
48.9	-51.7426	-55.0537	-58.8989
49	-51.7731	-55.0842	-58.8837
49.1	-51.7273	-55.0842	-58.8837
49.2	-51.7426	-55.13	-58.8531
49.3	-51.7426	-55.1758	-58.9294
49.4	-51.7273	-55.1148	-58.9447
49.5	-51.7578	-55.1605	-58.96
49.6	-51.8188	-55.1453	-58.96
49.7	-51.8188	-55.1605	-58.9752
49.8	-51.8341	-55.1605	-58.9447
49.9	-51.8646	-55.1453	-59.021
50	-51.8341	-55.1453	-59.0363
50.1	-51.8341	-55.191	-59.0515
50.2	-51.8188	-55.1605	-59.0363
50.3	-51.8188	-55.2063	-59.021
50.4	-51.8341	-55.2978	-59.0668
50.5	-51.7883	-55.2521	-59.0973
50.6	-51.8341	-55.3131	-59.1125
50.7	-51.8646	-55.3284	-59.1278
50.8	-51.8951	-55.3131	-59.1278
50.9	-51.8799	-55.3589	-59.082
51	-51.9257	-55.3742	-59.1125
51.1	-51.9104	-55.3589	-59.1888
51.2	-51.9257	-55.3589	-59.1583
51.3	-51.9257	-55.3436	-59.1583
51.4	-51.8951	-55.3436	-59.1583
51.5	-51.9257	-55.3589	-59.1431
51.6	-51.8799	-55.2978	-59.1736
51.7	-51.8494	-55.3131	-59.1736
51.8	-51.8494	-55.3436	-59.2499
51.9	-51.8494	-55.2978	-59.2194
52	-51.8494	-55.3436	-59.2346
52.1	-51.9104	-55.3436	-59.1888
52.2	-51.8799	-55.3436	-59.1888
52.3	-51.8646	-55.3589	-59.1888
52.4	-51.9104	-55.3436	-59.1888
52.5	-51.8646	-55.3131	-59.2041
52.6	-51.8799	-55.3284	-59.1888
52.7	-51.8341	-55.2978	-59.1736
52.8	-51.8188	-55.2978	-59.1278
52.9	-51.7883	-55.3131	-59.1431
53	-51.7426	-55.2521	-59.1431
53.1	-51.7273	-55.2521	-59.1736
53.2	-51.712	-55.2521	-59.1736
53.3	-51.6663	-55.2368	-59.1431
53.4	-51.651	-55.2368	-59.1583
53.5	-51.651	-55.2521	-59.082
53.6	-51.6357	-55.2673	-59.0515
53.7	-51.6663	-55.3284	-59.0515
53.8	-51.651	-55.2826	-59.082
53.9	-51.6663	-55.3284	-59.0363
54	-51.6663	-55.3589	-59.0515
54.1	-51.6205	-55.3589	-59.0363
54.2	-51.651	-55.3742	-59.0057
54.3	-51.6663	-55.3894	-59.021
54.4	-51.6663	-55.3436	-58.96
54.5	-51.6357	-55.3894	-58.9905
54.6	-51.6663	-55.4047	-58.9752
54.7	-51.6205	-55.4047	-59.0057
54.8	-51.6357	-55.4352	-58.9752
54.9	-51.6663	-55.3742	-58.9447
55	-51.6357	-55.3894	-58.9142
55.1	-51.6663	-55.3894	-58.8989
55.2	-51.6205	-55.3436	-58.8684
55.3	-51.6663	-55.3742	-58.8684
55.4	-51.651	-55.3742	-58.9142
55.5	-51.6357	-55.3436	-58.8989
55.6	-51.6205	-55.3436	-58.9142
55.7	-51.6663	-55.3436	-58.8989
55.8	-51.651	-55.3131	-58.8684
55.9	-51.6663	-55.3589	-58.8226
56	-51.6815	-55.3436	-58.7921
56.1	-51.651	-55.3284	-58.8074
56.2	-51.712	-55.3436	-58.8074
56.3	-51.6663	-55.2673	-58.8226
56.4	-51.6968	-55.2673	-58.8074
56.5	-51.6815	-55.2521	-58.8531
56.6	-51.712	-55.2216	-58.8531
56.7	-51.6968	-55.2521	-58.8379
56.8	-51.7426	-55.2673	-58.8531
56.9	-51.7273	-55.2673	-58.8379
57	-51.7426	-55.2978	-58.8379
57.1	-51.7731	-55.2978	-58.8226
57.2	-51.7578	-55.2521	-58.8226
57.3	-51.7883	-55.2673	-58.8226
57.4	-51.7883	-55.1758	-58.8531
57.5	-51.8036	-55.2521	-58.8531
57.6	-51.7883	-55.2978	-58.8989
57.7	-51.7578	-55.2521	-58.8531
57.8	-51.7426	-55.2368	-58.8837
57.9	-51.7426	-55.2063	-58.8989
58	-51.7426	-55.2216	-58.8379
58.1	-51.7883	-55.2673	-58.8226
58.2	-51.8341	-55.2673	-58.8226
58.3	-51.7426	-55.2063	-58.8074
58.4	-51.7731	-55.191	-58.7921
58.5	-51.7578	-55.191	-58.8074
58.6	-51.7883	-55.2063	-58.7921
58.7	-51.8188	-55.2216	-58.8074
58.8	-51.7731	-55.13	-58.7921
58.9	-51.7731	-55.191	-58.8226
59	-51.8036	-55.2063	-58.8226
59.1	-51.8341	-55.191	-58.7769
59.2	-51.8036	-55.1605	-58.7616
59.3	-51.7883	-55.1453	-58.7463
59.4	-51.7578	-55.1605	-58.7311
59.5	-51.8188	-55.191	-58.6853
59.6	-51.8036	-55.191	-58.67
59.7	-51.712	-55.1148	-58.609
59.8	-51.7273	-55.1453	-58.6243
59.9	-51.7578	-55.13	-58.6243
60	-51.7731	-55.191	-58.5785
60.1	-51.7426	-55.1758	-58.609
60.2	-51.712	-55.13	-58.5938
60.3	-51.712	-55.0995	-58.5632
60.4	-51.7731	-55.13	-58.5785
60.5	-51.712	-55.1148	-58.5632
60.6	-51.6968	-55.0995	-58.5632
60.7	-51.6968	-55.069	-58.5785
60.8	-51.712	-55.0232	-58.5632
60.9	-51.7731	-55.0384	-58.5327
61	-51.7273	-55.0537	-58.5327
61.1	-51.6968	-55.1148	-58.5175
61.2	-51.712	-55.0995	-58.5327
61.3	-51.7578	-55.069	-58.4869
61.4	-51.7426	-55.0842	-58.4717
61.5	-51.7426	-55.1453	-58.4717
61.6	-51.712	-55.1453	-58.4564
61.7	-51.6815	-55.1605	-58.4259
61.8	-51.7426	-55.1605	-58.4106
61.9	-51.7273	-55.1148	-58.3954
62	-51.7578	-55.1453	-58.3801
62.1	-51.712	-55.1453	-58.3954
62.2	-51.6968	-55.191	-58.3344
62.3	-51.7731	-55.2368	-58.3801
62.4	-51.8188	-55.2216	-58.3801
62.5	-51.8188	-55.2368	-58.3496
62.6	-51.7883	-55.2063	-58.3801
62.7	-51.7578	-55.2368	-58.3344
62.8	-51.8036	-55.2826	-58.3344
62.9	-51.8951	-55.3131	-58.3038
63	-51.8341	-55.2826	-58.3191
63.1	-51.8646	-55.3131	-58.3191
63.2	-51.8494	-55.2826	-58.3191
63.3	-51.8341	-55.2826	-58.2733
63.4	-51.9257	-55.3436	-58.3038
63.5	-51.9562	-55.3284	-58.2886
63.6	-51.9562	-55.3589	-58.2275
63.7	-51.9409	-55.3436	-58.2733
63.8	-51.9562	-55.3131	-58.2428
63.9	-51.9867	-55.2978	-58.2581
64	-52.0325	-55.3436	-58.2428
64.1	-52.002	-55.3436	-58.2123
64.2	-52.063	-55.3742	-58.1818
64.3	-52.0325	-55.3589	-58.197
64.4	-52.002	-55.3284	-58.1207
64.5	-52.0477	-55.3589	-58.1055
64.6	-52.0935	-55.2826	-58.1055
64.7	-52.1393	-55.3131	-58.0444
64.8	-52.1393	-55.3284	-58.0902
64.9	-52.1088	-55.3284	-58.0597
65	-52.0782	-55.3284	-58.075
65.1	-52.124	-55.3284	-58.075
65.2	-52.1545	-55.2978	-58.0597
65.3	-52.1851	-55.2521	-58.0292
65.4	-52.2156	-55.2826	-57.9987
65.5	-52.1698	-55.2673	-57.9987
65.6	-52.1851	-55.3131	-58.0292
65.7	-52.1545	-55.2826	-57.9834
65.8	-52.1698	-55.2673	-57.9071
65.9	-52.2156	-55.2826	-57.8766
66	-52.2308	-55.2216	-57.9071
66.1	-52.1851	-55.2063	-57.8613
66.2	-52.2003	-55.2216	-57.8613
66.3	-52.1545	-55.2368	-57.8003
66.4	-52.124	-55.2521	-57.785
66.5	-52.1851	-55.2673	-57.8308
66.6	-52.1698	-55.2063	-57.7698
66.7	-52.2003	-55.2368	-57.7393
66.8	-52.1698	-55.2063	-57.7087
66.9	-52.1393	-55.191	-57.6935
67	-52.124	-55.191	-57.724
67.1	-52.1088	-55.1605	-57.6935
67.2	-52.124	-55.2063	-57.6172
67.3	-52.1545	-55.2368	-57.6935
67.4	-52.1698	-55.2368	-57.6782
67.5	-52.1545	-55.2216	-57.6477
67.6	-52.1698	-55.2216	-57.6172
67.7	-52.0935	-55.1605	-57.5867
67.8	-52.0935	-55.1758	-57.6477
67.9	-52.0935	-55.1605	-57.663
68	-52.1393	-55.13	-57.6019
68.1	-52.1545	-55.191	-57.6172
68.2	-52.1545	-55.191	-57.6172
68.3	-52.1545	-55.2368	-57.6324
68.4	-52.1545	-55.2368	-57.663
68.5	-52.1393	-55.2521	-57.6019
68.6	-52.0935	-55.2368	-57.5562
68.7	-52.1088	-55.2216	-57.6019
68.8	-52.0782	-55.191	-57.6172
68.9	-52.1545	-55.1605	-57.5714
69	-52.1698	-55.1605	-57.6019
69.1	-52.124	-55.1453	-57.5409
69.2	-52.1545	-55.191	-57.5409
69.3	-52.124	-55.191	-57.6324
69.4	-52.1088	-55.2063	-57.5714
69.5	-52.0782	-55.2216	-57.6324
69.6	-52.0782	-55.2216	-57.6172
69.7	-52.0325	-55.2368	-57.5867
69.8	-52.0935	-55.2216	-57.6477
69.9	-52.0935	-55.2368	-57.6782
70	-52.124	-55.2368	-57.6477
70.1	-52.124	-55.2521	-57.6935
70.2	-52.0782	-55.191	-57.6782
70.3	-52.124	-55.2368	-57.6935
70.4	-52.0782	-55.2216	-57.8156
70.5	-52.0477	-55.2368	-57.7698
70.6	-52.0325	-55.2521	-57.8461
70.7	-52.0782	-55.2521	-57.8003
70.8	-52.063	-55.2521	-57.7545
70.9	-52.1393	-55.2826	-57.8003
71	-52.1393	-55.2673	-57.8613
71.1	-52.1545	-55.2673	-57.8766
71.2	-52.1698	-55.2826	-57.8613
71.3	-52.124	-55.2521	-57.8613
71.4	-52.1545	-55.2521	-57.8308
71.5	-52.1393	-55.2216	-57.8918
71.6	-52.0782	-55.2216	-57.8918
71.7	-52.0782	-55.2063	-57.9529
71.8	-52.0935	-55.1758	-57.9529
71.9	-52.0782	-55.1605	-57.9071
72	-52.124	-55.1758	-57.9224
72.1	-52.124	-55.1605	-57.8918
72.2	-52.124	-55.1605	-57.9224
72.3	-52.1698	-55.191	-57.9376
72.4	-52.1088	-55.1453	-57.9681
72.5	-52.1393	-55.1605	-57.9376
72.6	-52.1393	-55.1605	-57.9529
72.7	-52.0935	-55.1605	-57.8918
72.8	-52.0935	-55.1453	-57.9681
72.9	-52.0477	-55.13	-58.0444
73	-52.0172	-55.13	-58.0139
73.1	-52.002	-55.13	-58.0444
73.2	-52.002	-55.0842	-57.9987
73.3	-51.9714	-55.0537	-57.9681
73.4	-52.0172	-55.0232	-57.9834
73.5	-51.9867	-55.0079	-57.9987
73.6	-52.002	-55.0079	-57.9987
73.7	-52.0172	-55.0232	-58.0597
73.8	-51.9714	-54.9927	-58.0292
73.9	-51.9867	-54.9927	-58.0292
74	-51.9867	-54.9774	-58.0292
74.1	-51.9257	-54.9927	-57.9681
74.2	-51.9257	-54.9927	-58.0292
74.3	-51.8799	-54.9927	-58.075
74.4	-51.8494	-54.9927	-58.0597
74.5	-51.8646	-55.0232	-58.075
74.6	-51.8494	-55.0232	-58.0597
74.7	-51.8646	-55.0232	-58.0139
74.8	-51.8799	-55.0537	-58.0292
74.9	-51.8341	-55.069	-58.0292
75	-51.8646	-55.0995	-58.0444
75.1	-51.8494	-55.0995	-58.136
75.2	-51.8494	-55.1148	-58.1055
75.3	-51.8646	-55.13	-58.136
75.4	-51.8799	-55.1605	-58.136
75.5	-51.8646	-55.1758	-58.1055
75.6	-51.9257	-55.2063	-58.136
75.7	-51.9257	-55.2216	-58.136
75.8	-51.9257	-55.2063	-58.1512
75.9	-51.9562	-55.2673	-58.1665
76	-51.9257	-55.2368	-58.2275
76.1	-51.9867	-55.2673	-58.2275
76.2	-51.9867	-55.2673	-58.2733
76.3	-51.9714	-55.2978	-58.2123
76.4	-52.002	-55.3284	-58.2581
76.5	-52.0477	-55.3131	-58.2581
76.6	-52.0325	-55.3284	-58.2428
76.7	-52.0325	-55.3131	-58.2733
76.8	-52.063	-55.3284	-58.3038
76.9	-52.0477	-55.2978	-58.3191
77	-52.0935	-55.3131	-58.3496
77.1	-52.0477	-55.2978	-58.3649
77.2	-52.063	-55.3589	-58.3344
77.3	-52.063	-55.3742	-58.3649
77.4	-52.0325	-55.3894	-58.3191
77.5	-52.0782	-55.3742	-58.3649
77.6	-52.0782	-55.3284	-58.3649
77.7	-52.0935	-55.4047	-58.3344
77.8	-52.1393	-55.4352	-58.3954
77.9	-52.1393	-55.4199	-58.4106
78	-52.124	-55.4047	-58.4106
78.1	-52.1393	-55.4047	-58.4412
78.2	-52.063	-55.4504	-58.4717
78.3	-52.1393	-55.4657	-58.4106
78.4	-52.1851	-55.4352	-58.4412
78.5	-52.1393	-55.4047	-58.4106
78.6	-52.1545	-55.4352	-58.3801
78.7	-52.124	-55.4504	-58.4259
78.8	-52.1393	-55.481	-58.3801
78.9	-52.1851	-55.4199	-58.3954
79	-52.1698	-55.3894	-58.3954
79.1	-52.063	-55.4504	-58.3649
79.2	-52.124	-55.4657	-58.3801
79.3	-52.1545	-55.4504	-58.4106
79.4	-52.1393	-55.3894	-58.3496
79.5	-52.124	-55.4047	-58.3801
79.6	-52.063	-55.4352	-58.3649
79.7	-52.1698	-55.4352	-58.3038
79.8	-52.1698	-55.3894	-58.3038
79.9	-52.1393	-55.3894	-58.2581
80	-52.1088	-55.4199	-58.2581
80.1	-52.1393	-55.4504	-58.2428
80.2	-52.124	-55.4657	-58.2275
80.3	-52.1393	-55.4199	-58.2428
80.4	-52.124	-55.3894	-58.2123
80.5	-52.0782	-55.3894	-58.1818
80.6	-52.124	-55.4199	-58.1818
80.7	-52.1393	-55.4047	-58.2123
80.8	-52.1393	-55.3742	-58.1512
80.9	-52.1393	-55.2978	-58.2275
81	-52.0477	-55.3589	-58.1818
81.1	-52.1088	-55.4047	-58.197
81.2	-52.1545	-55.3894	-58.2123
81.3	-52.1088	-55.4047	-58.1512
81.4	-52.1088	-55.3589	-58.1665
81.5	-52.0477	-55.3589	-58.1512
81.6	-52.063	-55.3894	-58.136
81.7	-52.1088	-55.4047	-58.1512
81.8	-52.0782	-55.4047	-58.1512
81.9	-52.0782	-55.4047	-58.1207
82	-52.0325	-55.3742	-58.136
82.1	-52.0325	-55.4352	-58.1207
82.2	-52.1088	-55.4962	-58.1055
82.3	-52.124	-55.4657	-58.1207
82.4	-52.0782	-55.4962	-58.1055
82.5	-52.0782	-55.4657	-58.1207
82.6	-52.063	-55.4657	-58.136
82.7	-52.063	-55.5115	-58.0902
82.8	-52.124	-55.5725	-58.136
82.9	-52.0782	-55.5573	-58.136
83	-52.0935	-55.542	-58.136
83.1	-52.063	-55.5725	-58.1512
83.2	-52.0477	-55.5573	-58.136
83.3	-52.1088	-55.603	-58.136
83.4	-52.1698	-55.6183	-58.1818
83.5	-52.1393	-55.6641	-58.1512
83.6	-52.124	-55.6488	-58.1512
83.7	-52.1545	-55.603	-58.1818
83.8	-52.0935	-55.5725	-58.1665
83.9	-52.1698	-55.6183	-58.1665
84	-52.1545	-55.6793	-58.1818
84.1	-52.1545	-55.6641	-58.136
84.2	-52.1698	-55.6488	-58.1818
84.3	-52.0935	-55.6183	-58.1818
84.4	-52.124	-55.603	-58.1665
84.5	-52.1851	-55.603	-58.2275
84.6	-52.1545	-55.6488	-58.197
84.7	-52.1698	-55.6488	-58.2123
84.8	-52.2003	-55.6335	-58.2123
84.9	-52.124	-55.6488	-58.1665
85	-52.124	-55.603	-58.1512
85.1	-52.1088	-55.5725	-58.197
85.2	-52.1393	-55.5725	-58.2123
85.3	-52.2003	-55.6335	-58.2275
85.4	-52.1393	-55.6335	-58.2275
85.5	-52.1545	-55.6335	-58.1665
85.6	-52.1088	-55.5725	-58.1818
85.7	-52.0782	-55.5725	-58.1818
85.8	-52.0935	-55.5573	-58.2123
85.9	-52.1545	-55.5573	-58.2123
86	-52.1393	-55.603	-58.136
86.1	-52.1545	-55.5725	-58.1665
86.2	-52.124	-55.603	-58.197
86.3	-52.0477	-55.5725	-58.1665
86.4	-52.0782	-55.5725	-58.1207
86.5	-52.0477	-55.5115	-58.136
86.6	-52.0782	-55.5115	-58.1665
86.7	-52.0935	-55.5267	-58.1818
86.8	-52.063	-55.5573	-58.1207
86.9	-52.063	-55.5725	-58.0902
87	-52.0782	-55.5573	-58.1055
87.1	-52.0172	-55.5878	-58.1512
87.2	-52.002	-55.5573	-58.1665
87.3	-52.063	-55.5267	-58.136
87.4	-52.0477	-55.5115	-58.0902
87.5	-52.0935	-55.481	-58.1055
87.6	-52.063	-55.5115	-58.1512
87.7	-52.0477	-55.5573	-58.1207
87.8	-52.063	-55.542	-58.0902
87.9	-52.0172	-55.5573	-58.0597
88	-52.0172	-55.542	-58.0597
88.1	-52.0325	-55.5115	-58.1055
88.2	-52.063	-55.5115	-58.075
88.3	-52.0935	-55.4657	-58.0444
88.4	-52.124	-55.4657	-57.9987
88.5	-52.063	-55.481	-57.9987
88.6	-52.0782	-55.5267	-58.0292
88.7	-52.0172	-55.542	-58.0597
88.8	-52.0172	-55.5267	-58.0444
88.9	-52.0325	-55.5267	-57.9987
89	-52.002	-55.5267	-58.0139
89.1	-52.0477	-55.5267	-58.0292
89.2	-52.063	-55.481	-58.0444
89.3	-52.0477	-55.481	-57.9987
89.4	-52.063	-55.4504	-57.9987
89.5	-52.0782	-55.481	-57.9681
89.6	-52.002	-55.542	-57.9834
89.7	-52.0172	-55.542	-57.9834
89.8	-52.0172	-55.5573	-58.0292
89.9	-51.9867	-55.5573	-58.0292
90	-52.0477	-55.603	-57.9987
90.1	-52.0172	-55.542	-58.0139
90.2	-52.063	-55.5878	-58.0292
90.3	-52.063	-55.5573	-58.075
90.4	-52.0477	-55.603	-58.075
90.5	-52.063	-55.5725	-58.075
90.6	-52.063	-55.5573	-58.0292
90.7	-52.063	-55.603	-58.0444
90.8	-52.0935	-55.603	-58.0902
90.9	-52.0782	-55.6488	-58.1055
91	-52.0172	-55.6641	-58.136
91.1	-52.0782	-55.6488	-58.1207
91.2	-52.0782	-55.6335	-58.1207
91.3	-52.124	-55.6488	-58.075
91.4	-52.1393	-55.6183	-58.1055
91.5	-52.1393	-55.603	-58.1055
91.6	-52.1698	-55.603	-58.1665
91.7	-52.1698	-55.5573	-58.1512
91.8	-52.1698	-55.5573	-58.1055
91.9	-52.1698	-55.5115	-58.1055
92	-52.2003	-55.5115	-58.1055
92.1	-52.124	-55.542	-58.1512
92.2	-52.1851	-55.542	-58.136
92.3	-52.1393	-55.542	-58.136
92.4	-52.1088	-55.5573	-58.1207
92.5	-52.1393	-55.5573	-58.1055
92.6	-52.124	-55.5573	-58.0597
92.7	-52.1545	-55.5725	-58.0597
92.8	-52.1545	-55.5267	-58.0902
92.9	-52.1393	-55.5267	-58.0902
93	-52.1393	-55.5115	-58.1055
93.1	-52.1698	-55.4657	-58.0597
93.2	-52.0935	-55.481	-58.0292
93.3	-52.1545	-55.4504	-57.9987
93.4	-52.1088	-55.4352	-57.9681
93.5	-52.0782	-55.4504	-57.9834
93.6	-52.1088	-55.4657	-57.9834
93.7	-52.0477	-55.4352	-57.9987
93.8	-52.0477	-55.4199	-57.9987
93.9	-52.0172	-55.3894	-57.9834
94	-52.002	-55.4504	-57.9376
94.1	-52.002	-55.4199	-57.9224
94.2	-52.002	-55.4199	-57.9224
94.3	-51.9867	-55.481	-57.9529
94.4	-52.0172	-55.4657	-57.9681
94.5	-52.0325	-55.481	-57.9529
94.6	-51.9867	-55.4962	-57.9681
94.7	-52.063	-55.4962	-57.9224
94.8	-52.002	-55.5115	-57.9224
94.9	-52.0477	-55.542	-57.8918
95	-52.063	-55.4962	-57.8918
95.1	-52.063	-55.5267	-57.8613
95.2	-52.0782	-55.542	-57.9071
95.3	-52.0782	-55.5267	-57.9071
95.4	-52.0325	-55.5725	-57.8918
95.5	-52.0782	-55.5267	-57.9071
95.6	-52.124	-55.5115	-57.8918
95.7	-52.0935	-55.542	-57.8613
95.8	-52.124	-55.542	-57.8156
95.9	-52.124	-55.5115	-57.8156
96	-52.124	-55.5267	-57.8461
96.1	-52.124	-55.481	-57.8613
96.2	-52.1088	-55.4962	-57.8461
96.3	-52.1393	-55.481	-57.8918
96.4	-52.1393	-55.4352	-57.8918
96.5	-52.1545	-55.4657	-57.8613
96.6	-52.1393	-55.4504	-57.8918
96.7	-52.1393	-55.4199	-57.8613
96.8	-52.0782	-55.4352	-57.8766
96.9	-52.1545	-55.4504	-57.8308
97	-52.1088	-55.4657	-57.8308
97.1	-52.0782	-55.5115	-57.8613
97.2	-52.0935	-55.5115	-57.9224
97.3	-52.0935	-55.4962	-57.9071
97.4	-52.0782	-55.5115	-57.9529
97.5	-52.124	-55.4657	-57.9681
97.6	-52.0935	-55.5573	-57.9376
97.7	-52.1545	-55.542	-57.9529
97.8	-52.1545	-55.5115	-57.9224
97.9	-52.124	-55.481	-57.9376
98	-52.0935	-55.4962	-57.9224
98.1	-52.0782	-55.5267	-57.9224
98.2	-52.1088	-55.5267	-57.9376
98.3	-52.1698	-55.481	-57.9529
98.4	-52.1545	-55.4199	-57.9987
98.5	-52.1088	-55.481	-57.9987
98.6	-52.1088	-55.4657	-58.0444
98.7	-52.1545	-55.4962	-57.9987
98.8	-52.1393	-55.4504	-58.0444
98.9	-52.1393	-55.4047	-58.0292
99	-52.063	-55.5115	-58.0444
99.1	-52.1545	-55.5115	-58.0139
99.2	-52.1698	-55.481	-57.9987
99.3	-52.0935	-55.4657	-57.9987
99.4	-52.1088	-55.4504	-57.9834
99.5	-52.1088	-55.481	-57.9224
99.6	-52.124	-55.5115	-57.9529
99.7	-52.124	-55.4504	-57.9681
99.8	-52.063	-55.4504	-57.9376
99.9	-52.063	-55.4352	-57.9529
100	-52.124	-55.4199	-57.9529
100.1	-52.0935	-55.4962	-57.9224
100.2	-52.0935	-55.4352	-57.9376
100.3	-52.0782	-55.4047	-57.9071
100.4	-52.063	-55.3589	-57.8918
100.5	-52.0935	-55.3589	-57.8918
100.6	-52.063	-55.3436	-57.8613
100.7	-52.0325	-55.3284	-57.8461
100.8	-52.0477	-55.2826	-57.8308
100.9	-52.0325	-55.2673	-57.785
101	-52.0325	-55.2978	-57.8156
101.1	-52.002	-55.2826	-57.8156
101.2	-51.9714	-55.3284	-57.785
101.3	-51.9867	-55.3284	-57.785
101.4	-52.0325	-55.2826	-57.7698
101.5	-51.9714	-55.2826	-57.785
101.6	-52.002	-55.3131	-57.8003
101.7	-51.9409	-55.3284	-57.7698
101.8	-51.9714	-55.3589	-57.785
101.9	-52.0172	-55.3131	-57.8156
102	-52.0172	-55.2978	-57.8003
102.1	-52.0172	-55.3131	-57.8308
102.2	-51.9714	-55.2978	-57.8461
102.3	-51.9714	-55.3894	-57.8156
102.4	-52.0172	-55.3742	-57.8766
102.5	-52.0477	-55.3436	-57.8461
102.6	-51.9867	-55.3589	-57.8766
102.7	-52.0172	-55.3131	-57.8766
102.8	-51.9867	-55.3284	-57.8766
102.9	-51.9562	-55.3894	-57.8918
103	-52.0325	-55.4047	-57.9224
103.1	-52.0325	-55.3589	-57.9071
103.2	-52.063	-55.3742	-57.9224
103.3	-52.0477	-55.2826	-57.9681
103.4	-52.0325	-55.2978	-57.9224
103.5	-52.0172	-55.3589	-57.9529
103.6	-52.0325	-55.3436	-57.9376
103.7	-52.0172	-55.4199	-57.9376
103.8	-52.0935	-55.3894	-57.9529
103.9	-52.0935	-55.3284	-57.9224
104	-52.063	-55.3742	-57.9071
104.1	-52.124	-55.3284	-57.9071
104.2	-52.1088	-55.3436	-57.9071
104.3	-52.0935	-55.3742	-57.8918
104.4	-52.0782	-55.3436	-57.9071
104.5	-52.1088	-55.3589	-57.8461
104.6	-52.124	-55.3284	-57.8766
104.7	-52.1698	-55.2368	-57.8918
104.8	-52.124	-55.2826	-57.8766
104.9	-52.124	-55.3131	-57.9376
105	-52.1088	-55.2673	-57.8918
105.1	-52.063	-55.2978	-57.9376
105.2	-52.0935	-55.2521	-57.9376
105.3	-52.0935	-55.2063	-57.8766
105.4	-52.1088	-55.2063	-57.8918
105.5	-52.124	-55.1453	-57.9376
105.6	-52.1088	-55.1605	-57.9224
105.7	-52.0782	-55.2216	-57.9376
105.8	-52.0325	-55.1453	-57.8918
105.9	-52.002	-55.1605	-57.8613
106	-51.9867	-55.1453	-57.9376
106.1	-52.0325	-55.0842	-57.9071
106.2	-51.9867	-55.0995	-57.8766
106.3	-52.0477	-55.0842	-57.8461
106.4	-52.0172	-55.0537	-57.8613
106.5	-51.9714	-55.1148	-57.8766
106.6	-51.9714	-55.1148	-57.8461
106.7	-51.9257	-55.1148	-57.7698
106.8	-51.8951	-55.1453	-57.8003
106.9	-51.9104	-55.0537	-57.8613
107	-51.9257	-55.0537	-57.785
107.1	-51.9257	-55.0537	-57.8003
107.2	-51.9562	-55.0232	-57.7698
107.3	-51.8951	-55.069	-57.7698
107.4	-51.9104	-55.0842	-57.7698
107.5	-51.8951	-55.0537	-57.7545
107.6	-51.8494	-55.0842	-57.6935
107.7	-51.8799	-55.0995	-57.724
107.8	-51.8494	-55.0232	-57.724
107.9	-51.8494	-55.0384	-57.7087
108	-51.8799	-54.9622	-57.6935
108.1	-51.8799	-54.9622	-57.5714
108.2	-51.8799	-54.9469	-57.6477
108.3	-51.9104	-54.9316	-57.6477
108.4	-51.8494	-54.9774	-57.6172
108.5	-51.8646	-55.0232	-57.5867
108.6	-51.8494	-55.0232	-57.5256
108.7	-51.7731	-55.0537	-57.5562
108.8	-51.8188	-55.0537	-57.5867
108.9	-51.7731	-55.0232	-57.5867
109	-51.7731	-55.0537	-57.5714
109.1	-51.8036	-55.0232	-57.5562
109.2	-51.8188	-55.0232	-57.5256
109.3	-51.8036	-55.0384	-57.6019
109.4	-51.8341	-54.9927	-57.6019
109.5	-51.8188	-55.069	-57.5409
109.6	-51.8188	-55.0537	-57.5409
109.7	-51.8188	-55.0384	-57.5256
109.8	-51.7578	-55.0384	-57.5714
109.9	-51.7883	-55.069	-57.5714
110	-51.7426	-55.0232	-57.5867
110.1	-51.7426	-55.069	-57.6019
110.2	-51.7426	-55.0232	-57.6019
110.3	-51.7578	-55.0384	-57.6019
110.4	-51.7578	-55.0842	-57.6782
110.5	-51.7731	-55.0232	-57.724
110.6	-51.7883	-55.0537	-57.6477
110.7	-51.7731	-55.069	-57.6935
110.8	-51.8036	-55.069	-57.6477
110.9	-51.7578	-55.0995	-57.7087
111	-51.7883	-55.1605	-57.7545
111.1	-51.7731	-55.1453	-57.785
111.2	-51.7578	-55.1758	-57.7393
111.3	-51.7426	-55.2063	-57.7393
111.4	-51.712	-55.191	-57.7393
111.5	-51.712	-55.2063	-57.785
111.6	-51.6968	-55.1605	-57.8461
111.7	-51.6663	-55.1758	-57.8003
111.8	-51.651	-55.1605	-57.8308
111.9	-51.6968	-55.1148	-57.8003
112	-51.6663	-55.1148	-57.7698
112.1	-51.712	-55.1453	-57.785
112.2	-51.6968	-55.1148	-57.8156
112.3	-51.6663	-55.1453	-57.8156
112.4	-51.6968	-55.1453	-57.8308
112.5	-51.6357	-55.0995	-57.8003
112.6	-51.6205	-55.1758	-57.7393
112.7	-51.6205	-55.1453	-57.7545
112.8	-51.59	-55.1758	-57.7698
112.9	-51.5594	-55.1758	-57.8003
113	-51.5442	-55.1758	-57.785
113.1	-51.5137	-55.191	-57.7545
113.2	-51.4832	-55.2063	-57.7393
113.3	-51.4679	-55.1605	-57.7087
113.4	-51.3916	-55.2063	-57.6935
113.5	-51.4221	-55.2216	-57.7087
113.6	-51.3458	-55.191	-57.7393
113.7	-51.3306	-55.2063	-57.724
113.8	-51.3153	-55.1758	-57.7393
113.9	-51.2695	-55.191	-57.6477
114	-51.239	-55.2521	-57.6324
114.1	-51.2695	-55.2063	-57.6172
114.2	-51.2238	-55.2216	-57.6172
114.3	-51.239	-55.2368	-57.6477
114.4	-51.2238	-55.2063	-57.6477
114.5	-51.178	-55.2216	-57.6324
114.6	-51.1932	-55.2368	-57.5867
114.7	-51.1932	-55.2063	-57.5562
114.8	-51.1627	-55.2521	-57.4951
114.9	-51.1932	-55.2521	-57.5256
115	-51.1627	-55.2063	-57.4951
115.1	-51.1475	-55.2673	-57.5409
115.2	-51.1932	-55.2063	-57.6019
115.3	-51.1627	-55.2521	-57.5104
115.4	-51.178	-55.2673	-57.5256
115.5	-51.2085	-55.2368	-57.4951
115.6	-51.178	-55.2521	-57.4188
115.7	-51.2238	-55.2978	-57.4341
115.8	-51.1932	-55.2521	-57.4188
115.9	-51.178	-55.2673	-57.4493
116	-51.2085	-55.2826	-57.4799
116.1	-51.1932	-55.2368	-57.4493
116.2	-51.1627	-55.2673	-57.4646
116.3	-51.1932	-55.2216	-57.4646
116.4	-51.1932	-55.2521	-57.4188
116.5	-51.1627	-55.2521	-57.4341
116.6	-51.2085	-55.2521	-57.4341
116.7	-51.1475	-55.2826	-57.4341
116.8	-51.178	-55.2978	-57.4493
116.9	-51.178	-55.2673	-57.4799
117	-51.1475	-55.2673	-57.4799
117.1	-51.1627	-55.2978	-57.5256
117.2	-51.1017	-55.2063	-57.5104
117.3	-51.1017	-55.2216	-57.5104
117.4	-51.1322	-55.2063	-57.5562
117.5	-51.1475	-55.2521	-57.4799
117.6	-51.1627	-55.2216	-57.4951
117.7	-51.1932	-55.191	-57.4951
117.8	-51.1627	-55.2063	-57.5104
117.9	-51.1475	-55.2673	-57.5562
118	-51.1169	-55.2673	-57.5867
118.1	-51.0712	-55.2521	-57.5714
118.2	-51.178	-55.2368	-57.6019
118.3	-51.1627	-55.2368	-57.5867
118.4	-51.1475	-55.2826	-57.5867
118.5	-51.1017	-55.2216	-57.6019
118.6	-51.1169	-55.191	-57.5562
118.7	-51.1475	-55.2063	-57.5867
118.8	-51.178	-55.2216	-57.5714
118.9	-51.1017	-55.2216	-57.5409
119	-51.0559	-55.2063	-57.6019
119.1	-51.1475	-55.191	-57.6172
119.2	-51.1169	-55.2216	-57.6019
119.3	-51.1322	-55.2521	-57.6019
119.4	-51.0559	-55.191	-57.5867
119.5	-51.0864	-55.1758	-57.5562
119.6	-51.1322	-55.191	-57.5562
119.7	-51.1017	-55.191	-57.5409
119.8	-51.0712	-55.2216	-57.5104
119.9	-51.0559	-55.1758	-57.5256
120	-51.1169	-55.1758	-57.4493
120.1	-51.0864	-55.1758	-57.4646
120.2	-51.0712	-55.2063	-57.4188
120.3	-50.9949	-55.1758	-57.373
120.4	-51.0406	-55.1758	-57.373
120.5	-51.0406	-55.1148	-57.373
120.6	-51.0406	-55.1758	-57.3273
120.7	-50.9949	-55.2063	-57.3578
120.8	-50.9338	-55.191	-57.3425
120.9	-50.9796	-55.191	-57.312
121	-50.9949	-55.1453	-57.373
121.1	-50.9949	-55.1453	-57.2815
121.2	-50.9033	-55.2063	-57.2968
121.3	-50.9033	-55.2216	-57.312
121.4	-50.9033	-55.2063	-57.251
121.5	-50.9338	-55.2368	-57.251
121.6	-50.9338	-55.1605	-57.2357
121.7	-50.8881	-55.2368	-57.1899
121.8	-50.8881	-55.2673	-57.1747
121.9	-50.8881	-55.2216	-57.1594
122	-50.9033	-55.2521	-57.0984
122.1	-50.9033	-55.2063	-57.1289
122.2	-50.8881	-55.2368	-57.0679
122.3	-50.8423	-55.2978	-57.0984
122.4	-50.8881	-55.3436	-57.1136
122.5	-50.9033	-55.3436	-57.0831
122.6	-50.9338	-55.3284	-57.0831
122.7	-50.9186	-55.2978	-57.0831
122.8	-50.8728	-55.3589	-57.0984
122.9	-50.9033	-55.4047	-57.1136
123	-50.9338	-55.3742	-57.1289
123.1	-50.9644	-55.4047	-57.0984
123.2	-50.9644	-55.3742	-57.1442
123.3	-50.9491	-55.3589	-57.1289
123.4	-50.9033	-55.4352	-57.1136
123.5	-50.9338	-55.4504	-57.1289
123.6	-51.0101	-55.4962	-57.0984
123.7	-51.0101	-55.481	-57.1136
123.8	-51.0406	-55.4352	-57.1136
123.9	-50.9949	-55.4352	-57.1136
124	-50.9949	-55.4657	-57.0831
124.1	-51.0101	-55.4504	-57.1136
124.2	-51.0254	-55.481	-57.0984
124.3	-51.0559	-55.481	-57.1136
124.4	-51.0559	-55.4504	-57.0984
124.5	-51.0101	-55.4504	-57.0831
124.6	-50.9949	-55.4199	-57.1136
124.7	-51.0101	-55.4657	-57.0526
124.8	-50.9949	-55.4962	-57.0679
124.9	-51.0712	-55.5115	-57.0679
125	-51.0406	-55.4657	-57.0984
125.1	-51.0254	-55.481	-57.0831
125.2	-50.9949	-55.4352	-57.0679
125.3	-50.9644	-55.481	-57.0068
125.4	-51.0101	-55.5267	-56.9763
125.5	-51.0254	-55.5115	-56.9763
125.6	-51.0559	-55.542	-57.0068
125.7	-51.0254	-55.5267	-57.0221
125.8	-51.0254	-55.5267	-56.9153
125.9	-50.9644	-55.481	-56.9
126	-50.9796	-55.4962	-56.9153
126.1	-50.9644	-55.542	-56.9305
126.2	-50.9796	-55.5725	-56.8848
126.3	-50.9949	-55.5573	-56.8848
126.4	-50.9644	-55.542	-56.8543
126.5	-50.9796	-55.5267	-56.9153
126.6	-50.8881	-55.5115	-56.9153
126.7	-50.9033	-55.5267	-56.8543
126.8	-50.9338	-55.542	-56.8237
126.9	-50.9186	-55.5725	-56.8237
127	-50.9033	-55.5878	-56.8848
127.1	-50.9338	-55.5878	-56.8695
127.2	-50.9033	-55.603	-56.839
127.3	-50.8728	-55.5878	-56.8237
127.4	-50.8728	-55.5725	-56.8695
127.5	-50.8728	-55.5725	-56.9153
127.6	-50.9033	-55.6183	-56.8695
127.7	-50.9033	-55.603	-56.839
127.8	-50.9338	-55.6793	-56.7932
127.9	-50.9186	-55.6641	-56.8695
128	-50.8881	-55.6793	-56.839
128.1	-50.8575	-55.6793	-56.8085
128.2	-50.8728	-55.6641	-56.7779
128.3	-50.8881	-55.6641	-56.7627
128.4	-50.8881	-55.6488	-56.8085
128.5	-50.9491	-55.6641	-56.7779
128.6	-50.9338	-55.6793	-56.7779
128.7	-50.9491	-55.7404	-56.7322
128.8	-50.9033	-55.6946	-56.7169
128.9	-50.8881	-55.7251	-56.7627
129	-50.8728	-55.7251	-56.7779
129.1	-50.8423	-55.6946	-56.7474
129.2	-50.8575	-55.7098	-56.7474
129.3	-50.9033	-55.6488	-56.7169
129.4	-50.9186	-55.6641	-56.6864
129.5	-50.9186	-55.6641	-56.7322
129.6	-50.9491	-55.6946	-56.7322
129.7	-50.9186	-55.7098	-56.7169
129.8	-50.9186	-55.7556	-56.6864
129.9	-50.8881	-55.7404	-56.6864
130	-50.8728	-55.7709	-56.7169
130.1	-50.8728	-55.7861	-56.7474
130.2	-50.8575	-55.7251	-56.7474
130.3	-50.9186	-55.7709	-56.7322
130.4	-50.9033	-55.7556	-56.7169
130.5	-50.9186	-55.7556	-56.7017
130.6	-50.9338	-55.7556	-56.7474
130.7	-50.9491	-55.7556	-56.7627
130.8	-50.9338	-55.8014	-56.7474
130.9	-50.9186	-55.8472	-56.7169
131	-50.9033	-55.8777	-56.7017
131.1	-50.8881	-55.8777	-56.7169
131.2	-50.8881	-55.9235	-56.7474
131.3	-50.9033	-55.8777	-56.7779
131.4	-50.9186	-55.9235	-56.7779
131.5	-50.9338	-55.8929	-56.7932
131.6	-50.9644	-55.8777	-56.7169
131.7	-50.9644	-55.8624	-56.7169
131.8	-50.9796	-55.8319	-56.7169
131.9	-50.9491	-55.8319	-56.7474
132	-50.9186	-55.8167	-56.7779
132.1	-50.9186	-55.8472	-56.7322
132.2	-50.9033	-55.8319	-56.7322
132.3	-50.8728	-55.8929	-56.7017
132.4	-50.827	-55.8777	-56.6864
132.5	-50.8118	-55.8777	-56.7169
132.6	-50.7965	-55.8777	-56.7169
132.7	-50.827	-55.8777	-56.6864
132.8	-50.8118	-55.8777	-56.6864
132.9	-50.827	-55.8472	-56.6406
133	-50.8423	-55.8777	-56.5949
133.1	-50.8118	-55.8319	-56.5796
133.2	-50.827	-55.8472	-56.5796
133.3	-50.8118	-55.8014	-56.6101
133.4	-50.7812	-55.8167	-56.6101
133.5	-50.7812	-55.7861	-56.5643
133.6	-50.766	-55.7709	-56.5796
133.7	-50.7355	-55.7709	-56.5491
133.8	-50.7355	-55.7404	-56.5185
133.9	-50.6897	-55.8167	-56.5338
134	-50.6592	-55.8014	-56.5796
134.1	-50.6592	-55.8472	-56.5643
134.2	-50.6287	-55.8319	-56.5949
134.3	-50.6439	-55.8624	-56.5491
134.4	-50.6134	-55.8777	-56.5338
134.5	-50.6287	-55.8929	-56.5185
134.6	-50.6287	-55.8929	-56.4728
134.7	-50.6439	-55.9082	-56.5033
134.8	-50.6287	-55.954	-56.5185
134.9	-50.6439	-55.9387	-56.5185
135	-50.6592	-55.954	-56.5491
135.1	-50.6592	-55.9235	-56.5185
135.2	-50.6592	-55.9692	-56.4575
135.3	-50.6439	-55.9235	-56.4728
135.4	-50.6897	-55.9387	-56.427
135.5	-50.6439	-55.954	-56.427
135.6	-50.6439	-55.954	-56.427
135.7	-50.6592	-55.9692	-56.4423
135.8	-50.6744	-55.954	-56.4423
135.9	-50.6744	-55.9998	-56.427
136	-50.6439	-55.9692	-56.3965
136.1	-50.6592	-55.9845	-56.3812
136.2	-50.6439	-55.9845	-56.366
136.3	-50.6592	-55.9845	-56.3049
136.4	-50.6287	-55.954	-56.3355
136.5	-50.6592	-55.9235	-56.3202
136.6	-50.6287	-55.9692	-56.3355
136.7	-50.6287	-55.9387	-56.3355
136.8	-50.6287	-55.9845	-56.3202
136.9	-50.6287	-55.9845	-56.3507
137	-50.6287	-56.0303	-56.3202
137.1	-50.6134	-56.015	-56.2897
137.2	-50.6287	-55.9998	-56.2592
137.3	-50.5981	-55.9845	-56.2744
137.4	-50.6134	-55.9845	-56.2134
137.5	-50.6134	-56.0303	-56.2439
137.6	-50.6439	-56.0761	-56.2439
137.7	-50.6744	-56.0608	-56.2592
137.8	-50.6439	-56.0455	-56.3049
137.9	-50.6744	-56.015	-56.2744
138	-50.6287	-56.0761	-56.3049
138.1	-50.6287	-56.1218	-56.2744
138.2	-50.6287	-56.0303	-56.2286
138.3	-50.6592	-55.9998	-56.2439
138.4	-50.6439	-56.015	-56.2439
138.5	-50.5981	-56.0455	-56.1981
138.6	-50.5981	-56.0455	-56.2286
138.7	-50.6134	-55.9692	-56.2439
138.8	-50.6439	-55.954	-56.2286
138.9	-50.5981	-55.9692	-56.2744
139	-50.6134	-55.9845	-56.2744
139.1	-50.5981	-55.9692	-56.2897
139.2	-50.6287	-55.9387	-56.2897
139.3	-50.5981	-55.9235	-56.2744
139.4	-50.5829	-55.9692	-56.2744
139.5	-50.5371	-55.9998	-56.2897
139.6	-50.5981	-55.9845	-56.2439
139.7	-50.6134	-55.9387	-56.2744
139.8	-50.5676	-55.9082	-56.2592
139.9	-50.5524	-55.9692	-56.2134
140	-50.5676	-55.954	-56.2286
140.1	-50.6134	-55.954	-56.1829
140.2	-50.5829	-55.9082	-56.1829
140.3	-50.5524	-55.8777	-56.1523
140.4	-50.5371	-55.8929	-56.1371
140.5	-50.5981	-55.9082	-56.1218
140.6	-50.5981	-55.9235	-56.1371
140.7	-50.5524	-55.8624	-56.1218
140.8	-50.5524	-55.8624	-56.1218
140.9	-50.5371	-55.8624	-56.1676
141	-50.5981	-55.9082	-56.1218
141.1	-50.5676	-55.8929	-56.1676
141.2	-50.5524	-55.8777	-56.1218
141.3	-50.4913	-55.8777	-56.1218
141.4	-50.5219	-55.8624	-56.1371
141.5	-50.5981	-55.9235	-56.1066
141.6	-50.5524	-55.9235	-56.1218
141.7	-50.5219	-55.9387	-56.1066
141.8	-50.4761	-55.9082	-56.1066
141.9	-50.5219	-55.8929	-56.1066
142	-50.5371	-55.9082	-56.1066
142.1	-50.5524	-55.954	-56.0608
142.2	-50.5066	-55.9692	-56.0913
142.3	-50.4761	-55.9692	-56.0913
142.4	-50.5066	-55.9692	-56.0913
142.5	-50.5066	-55.9387	-56.1066
142.6	-50.5676	-55.9845	-56.0913
142.7	-50.5371	-56.015	-56.1066
142.8	-50.5371	-56.0608	-56.1371
142.9	-50.5219	-56.0455	-56.1371
143	-50.5829	-56.0303	-56.1523
143.1	-50.6134	-56.015	-56.1981
143.2	-50.5981	-55.9845	-56.1829
143.3	-50.5829	-56.0455	-56.2439
143.4	-50.5676	-56.0455	-56.2592
143.5	-50.6134	-56.1218	-56.2134
143.6	-50.6287	-56.0761	-56.3049
143.7	-50.6744	-56.0761	-56.2897
143.8	-50.6287	-56.0455	-56.3049
143.9	-50.6592	-56.0608	-56.3202
144	-50.6134	-56.0913	-56.3202
144.1	-50.6592	-56.1218	-56.366
144.2	-50.6897	-56.1066	-56.3965
144.3	-50.6897	-56.0608	-56.366
144.4	-50.705	-56.0608	-56.3812
144.5	-50.6592	-56.015	-56.4423
144.6	-50.6439	-56.0608	-56.3965
144.7	-50.6744	-56.0761	-56.4423
144.8	-50.705	-56.0913	-56.3965
144.9	-50.6897	-56.0913	-56.3812
145	-50.6897	-56.0608	-56.427
145.1	-50.6592	-56.0455	-56.4423
145.2	-50.6287	-56.0303	-56.5033
145.3	-50.6592	-56.0608	-56.5338
145.4	-50.6592	-56.0608	-56.5033
145.5	-50.705	-56.0761	-56.5033
145.6	-50.6439	-56.0608	-56.5185
145.7	-50.6439	-56.0761	-56.5033
145.8	-50.5981	-56.0608	-56.5796
145.9	-50.5981	-56.0303	-56.5338
146	-50.5981	-56.0608	-56.5033
146.1	-50.5981	-56.0608	-56.5491
146.2	-50.6287	-56.1066	-56.5643
146.3	-50.6134	-56.1066	-56.5796
146.4	-50.5676	-56.0913	-56.5643
146.5	-50.5219	-56.0761	-56.5491
146.6	-50.5219	-56.0913	-56.5643
146.7	-50.5219	-56.0455	-56.6254
146.8	-50.5371	-56.015	-56.5338
146.9	-50.5371	-56.0455	-56.5491
147	-50.5066	-56.0455	-56.5796
147.1	-50.5066	-56.0913	-56.5949
147.2	-50.4913	-56.0608	-56.6711
147.3	-50.4761	-56.0455	-56.6254
147.4	-50.5066	-56.0455	-56.6406
147.5	-50.5219	-56.0303	-56.6864
147.6	-50.5066	-55.9692	-56.7169
147.7	-50.5219	-55.9692	-56.6864
147.8	-50.4761	-55.9692	-56.7169
147.9	-50.4456	-55.9845	-56.6406
148	-50.4456	-56.0455	-56.6864
148.1	-50.4303	-55.9998	-56.7474
148.2	-50.4456	-56.0455	-56.7169
148.3	-50.4456	-55.9998	-56.7322
148.4	-50.4303	-55.9845	-56.6711
148.5	-50.415	-55.9845	-56.7169
148.6	-50.3845	-55.9845	-56.7932
148.7	-50.3693	-55.954	-56.7627
148.8	-50.3235	-55.9692	-56.7627
148.9	-50.293	-55.9845	-56.7474
149	-50.3082	-55.9998	-56.7169
149.1	-50.354	-56.0303	-56.8085
149.2	-50.3235	-56.015	-56.8543
149.3	-50.3235	-56.0303	-56.7779
149.4	-50.3082	-55.9692	-56.8085
149.5	-50.2777	-55.9692	-56.7779
149.6	-50.2472	-55.9998	-56.7932
149.7	-50.2319	-55.9692	-56.8695
149.8	-50.2014	-55.9845	-56.8543
149.9	-50.2167	-55.9998	-56.8543
150	-50.2472	-56.0455	-56.8543
150.1	-50.2472	-56.0608	-56.839
150.2	-50.2625	-56.0761	-56.9153
150.3	-50.2014	-56.0608	-56.9305
150.4	-50.2319	-56.1218	-56.9
150.5	-50.2167	-56.1066	-56.9153
150.6	-50.1862	-56.0761	-56.9
150.7	-50.1709	-56.1218	-56.9
150.8	-50.1404	-56.0761	-56.9763
150.9	-50.1556	-56.0608	-57.0068
151	-50.1251	-56.0608	-57.0221
151.1	-50.1556	-56.0608	-57.0374
151.2	-50.1556	-56.015	-56.9916
151.3	-50.1709	-56.0608	-57.0221
151.4	-50.1404	-55.9998	-57.1289
151.5	-50.1556	-56.015	-57.1136
151.6	-50.1709	-56.0608	-57.1594
151.7	-50.1251	-56.015	-57.1442
151.8	-50.1099	-56.0608	-57.0984
151.9	-50.0793	-56.0303	-57.1289
152	-50.0793	-56.0303	-57.1289
152.1	-50.0488	-56.0303	-57.1747
152.2	-50.0488	-55.9998	-57.2052
152.3	-50.0336	-55.9845	-57.2205
152.4	-50.0641	-55.9845	-57.1899
152.5	-50.0488	-55.9845	-57.1899
152.6	-50.0183	-55.9387	-57.1289
152.7	-50.0488	-55.954	-57.1899
152.8	-49.9725	-55.8777	-57.251
152.9	-49.9878	-55.8929	-57.2205
153	-49.942	-55.8472	-57.2205
153.1	-49.8962	-55.8167	-57.1899
153.2	-49.8657	-55.8319	-57.1594
153.3	-49.8199	-55.8167	-57.1442
153.4	-49.7742	-55.8014	-57.1442
153.5	-49.7742	-55.8167	-57.1594
153.6	-49.7742	-55.8167	-57.2357
153.7	-49.7589	-55.8014	-57.2205
153.8	-49.7894	-55.8014	-57.1899
153.9	-49.7437	-55.8014	-57.2205
154	-49.7742	-55.7861	-57.1289
154.1	-49.7589	-55.7709	-57.1899
154.2	-49.7284	-55.7404	-57.2205
154.3	-49.6674	-55.7709	-57.2205
154.4	-49.6826	-55.7404	-57.2357
154.5	-49.6521	-55.7098	-57.2205
154.6	-49.6368	-55.7404	-57.2205
154.7	-49.6063	-55.7098	-57.2205
154.8	-49.5605	-55.6946	-57.1899
154.9	-49.5911	-55.6946	-57.1594
155	-49.5453	-55.6641	-57.2052
155.1	-49.53	-55.6793	-57.1899
155.2	-49.4995	-55.6641	-57.2052
155.3	-49.4995	-55.6335	-57.1747
155.4	-49.4995	-55.6335	-57.1442
155.5	-49.4995	-55.6335	-57.1442
155.6	-49.4995	-55.603	-57.1289
155.7	-49.4843	-55.6183	-57.1136
155.8	-49.53	-55.603	-57.0984
155.9	-49.53	-55.5573	-57.1289
156	-49.53	-55.5878	-57.1442
156.1	-49.5148	-55.542	-57.1899
156.2	-49.5453	-55.542	-57.1442
156.3	-49.5453	-55.5573	-57.1899
156.4	-49.53	-55.5115	-57.1747
156.5	-49.53	-55.5267	-57.1289
156.6	-49.53	-55.481	-57.1594
156.7	-49.53	-55.4352	-57.1289
156.8	-49.4995	-55.4657	-57.1136
156.9	-49.53	-55.481	-57.1136
157	-49.4995	-55.4657	-57.1594
157.1	-49.4995	-55.4657	-57.1594
157.2	-49.4537	-55.4199	-57.2052
157.3	-49.4385	-55.3589	-57.1899
157.4	-49.4232	-55.4047	-57.2052
157.5	-49.3774	-55.3742	-57.2205
157.6	-49.3469	-55.4047	-57.1442
157.7	-49.3622	-55.3742	-57.1747
157.8	-49.3469	-55.3436	-57.1594
157.9	-49.3622	-55.3284	-57.1442
158	-49.3622	-55.3742	-57.1594
158.1	-49.3011	-55.3589	-57.1747
158.2	-49.2859	-55.3742	-57.1594
158.3	-49.2401	-55.3131	-57.2205
158.4	-49.2554	-55.3284	-57.2205
158.5	-49.3011	-55.3894	-57.2205
158.6	-49.2554	-55.3284	-57.2662
158.7	-49.2096	-55.3284	-57.2052
158.8	-49.1791	-55.3284	-57.2052
158.9	-49.2096	-55.3436	-57.1899
159	-49.1791	-55.3742	-57.1747
159.1	-49.1638	-55.3284	-57.1594
159.2	-49.0875	-55.2673	-57.1747
159.3	-49.1333	-55.3589	-57.1442
159.4	-49.1333	-55.3894	-57.1442
159.5	-49.0875	-55.3284	-57.1442
159.6	-49.057	-55.3131	-57.1289
159.7	-49.0265	-55.2826	-57.1442
159.8	-49.0723	-55.3284	-57.1136
159.9	-49.0418	-55.3589	-57.1289
160	-48.9807	-55.2826	-57.1289
160.1	-48.9654	-55.2673	-57.0984
160.2	-49.0112	-55.2673	-57.0984
160.3	-49.0112	-55.2521	-57.0679
160.4	-48.9807	-55.2673	-57.0526
160.5	-48.9502	-55.2521	-57.0221
160.6	-48.9044	-55.13	-57.0374
160.7	-48.9502	-55.2063	-56.9611
160.8	-48.9197	-55.2216	-56.9916
160.9	-48.9044	-55.2368	-56.9305
161	-48.8739	-55.2216	-56.9611
161.1	-48.8586	-55.1605	-56.9611
161.2	-48.8892	-55.191	-56.9153
161.3	-48.9044	-55.2521	-56.9458
161.4	-48.8586	-55.2216	-56.9305
161.5	-48.8281	-55.2216	-56.9153
161.6	-48.8586	-55.2216	-56.9
161.7	-48.8586	-55.1758	-56.9153
161.8	-48.8586	-55.2673	-56.9
161.9	-48.8586	-55.2978	-56.9153
162	-48.8434	-55.2826	-56.8848
162.1	-48.8281	-55.2978	-56.8848
162.2	-48.8281	-55.2368	-56.9153
162.3	-48.8586	-55.2673	-56.8848
162.4	-48.8434	-55.3284	-56.8848
162.5	-48.8129	-55.3131	-56.839
162.6	-48.7824	-55.2826	-56.8695
162.7	-48.8434	-55.3131	-56.8543
162.8	-48.8434	-55.2673	-56.8543
162.9	-48.8739	-55.3131	-56.8237
163	-48.8586	-55.3436	-56.839
163.1	-48.8281	-55.2978	-56.839
163.2	-48.8434	-55.3589	-56.8237
163.3	-48.8434	-55.2673	-56.8543
163.4	-48.8892	-55.2978	-56.8237
163.5	-48.8739	-55.3284	-56.8543
163.6	-48.8739	-55.3284	-56.839
163.7	-48.8281	-55.3589	-56.8695
163.8	-48.8434	-55.3436	-56.8237
163.9	-48.8892	-55.2826	-56.839
164	-48.9044	-55.2826	-56.839
164.1	-48.9044	-55.3131	-56.8543
164.2	-48.8892	-55.2978	-56.8695
164.3	-48.8586	-55.3436	-56.8237
164.4	-48.8434	-55.2978	-56.8695
164.5	-48.8434	-55.2521	-56.8237
164.6	-48.9044	-55.2521	-56.8543
164.7	-48.8434	-55.2216	-56.839
164.8	-48.8434	-55.3131	-56.8695
164.9	-48.8129	-55.2978	-56.8695
165	-48.7366	-55.2978	-56.8543
165.1	-48.7518	-55.2826	-56.8848
165.2	-48.7671	-55.2978	-56.8085
165.3	-48.7671	-55.2063	-56.8085
165.4	-48.7671	-55.2673	-56.839
165.5	-48.7213	-55.2673	-56.9
165.6	-48.6603	-55.2826	-56.8543
165.7	-48.6603	-55.3284	-56.8543
165.8	-48.6603	-55.2826	-56.839
165.9	-48.6755	-55.2826	-56.8848
166	-48.6603	-55.2673	-56.9
166.1	-48.5992	-55.2521	-56.9
166.2	-48.584	-55.2673	-56.8848
166.3	-48.5687	-55.3131	-56.839
166.4	-48.4924	-55.2673	-56.9
166.5	-48.523	-55.2826	-56.9305
166.6	-48.5535	-55.2673	-56.9
166.7	-48.5535	-55.1758	-56.8695
166.8	-48.5535	-55.191	-56.8695
166.9	-48.4772	-55.1758	-56.9458
167	-48.4619	-55.2368	-56.9305
167.1	-48.4467	-55.2521	-56.8695
167.2	-48.4467	-55.2063	-56.839
167.3	-48.4467	-55.2063	-56.8695
167.4	-48.4772	-55.2521	-56.8848
167.5	-48.4314	-55.1758	-56.9
167.6	-48.4467	-55.1758	-56.8695
167.7	-48.4161	-55.2063	-56.839
167.8	-48.3398	-55.191	-56.8543
167.9	-48.3551	-55.2521	-56.9
168	-48.3398	-55.2368	-56.8848
168.1	-48.3856	-55.2216	-56.8543
168.2	-48.4009	-55.191	-56.8085
168.3	-48.3704	-55.1605	-56.7932
168.4	-48.3551	-55.191	-56.8543
168.5	-48.4009	-55.1605	-56.8543
168.6	-48.3246	-55.13	-56.839
168.7	-48.3246	-55.1605	-56.7932
168.8	-48.3093	-55.2063	-56.7779
168.9	-48.2941	-55.1758	-56.8237
169	-48.3551	-55.2063	-56.8237
169.1	-48.3246	-55.1605	-56.8237
169.2	-48.3398	-55.1453	-56.7474
169.3	-48.3093	-55.1605	-56.7169
169.4	-48.3246	-55.0842	-56.7169
169.5	-48.2788	-55.0995	-56.7627
169.6	-48.2941	-55.0842	-56.7627
169.7	-48.233	-55.0842	-56.7627
169.8	-48.2178	-55.0842	-56.7627
169.9	-48.2788	-55.13	-56.7169
170	-48.233	-55.0842	-56.7779
170.1	-48.2636	-55.13	-56.8085
170.2	-48.233	-55.1453	-56.8237
170.3	-48.233	-55.13	-56.7779
170.4	-48.2788	-55.1148	-56.8085
170.5	-48.233	-55.0842	-56.7779
170.6	-48.2178	-55.069	-56.7932
170.7	-48.2025	-55.0995	-56.839
170.8	-48.1415	-55.0384	-56.8543
170.9	-48.1567	-55.0842	-56.9
171	-48.2178	-55.13	-56.8695
171.1	-48.1567	-55.0842	-56.8695
171.2	-48.1873	-55.1148	-56.8848
171.3	-48.1873	-55.13	-56.9611
171.4	-48.1873	-55.0842	-56.9611
171.5	-48.1873	-55.0842	-56.9611
171.6	-48.1415	-55.069	-56.9458
171.7	-48.1262	-55.0384	-56.9305
171.8	-48.1415	-55.0537	-56.9458
171.9	-48.0957	-54.9622	-56.9458
172	-48.0499	-54.9622	-57.0068
172.1	-48.0652	-54.9927	-57.0068
172.2	-48.0042	-54.9469	-57.0374
172.3	-48.0499	-54.9622	-57.0526
172.4	-48.0652	-55.0079	-57.0068
172.5	-48.0347	-54.9622	-57.0068
172.6	-48.0499	-54.9927	-57.0679
172.7	-48.0042	-54.9774	-57.1136
172.8	-48.0042	-54.9469	-57.0984
172.9	-47.9431	-54.9622	-57.0984
173	-47.9431	-54.9316	-57.0831
173.1	-47.8668	-54.9011	-57.0679
173.2	-47.8668	-54.9316	-57.0221
173.3	-47.821	-54.8706	-57.0374
173.4	-47.7905	-54.8554	-57.0831
173.5	-47.7905	-54.8706	-57.1136
173.6	-47.699	-54.779	-57.1289
173.7	-47.699	-54.8096	-57.1289
173.8	-47.6837	-54.779	-57.1289
173.9	-47.6685	-54.7485	-57.0679
174	-47.6532	-54.7638	-57.0984
174.1	-47.6532	-54.7638	-57.0831
174.2	-47.6074	-54.779	-57.1289
174.3	-47.6227	-54.7943	-57.1289
174.4	-47.5769	-54.7638	-57.1136
174.5	-47.5311	-54.7638	-57.1442
174.6	-47.5464	-54.779	-57.0984
174.7	-47.4396	-54.7333	-57.0679
174.8	-47.4701	-54.7638	-57.0831
174.9	-47.4396	-54.7638	-57.1136
175	-47.3938	-54.7333	-57.0984
175.1	-47.3785	-54.779	-57.1442
175.2	-47.348	-54.7485	-57.1289
175.3	-47.348	-54.7333	-57.1442
175.4	-47.3175	-54.7333	-57.1594
175.5	-47.3023	-54.7638	-57.0984
175.6	-47.2717	-54.7333	-57.0831
175.7	-47.3175	-54.779	-57.0374
175.8	-47.2412	-54.7333	-57.0068
175.9	-47.2259	-54.7485	-57.0526
176	-47.2412	-54.779	-57.0679
176.1	-47.1802	-54.7333	-57.0526
176.2	-47.2259	-54.779	-57.0984
176.3	-47.1954	-54.7333	-57.0831
176.4	-47.1802	-54.7333	-57.0831
176.5	-47.1649	-54.718	-57.0984
176.6	-47.1802	-54.7028	-57.0679
176.7	-47.1344	-54.6722	-57.0679
176.8	-47.1649	-54.718	-57.0526
176.9	-47.1191	-54.718	-57.0679
177	-47.1649	-54.718	-57.0831
177.1	-47.2107	-54.7485	-57.0831
177.2	-47.1649	-54.6722	-57.0984
177.3	-47.2107	-54.6875	-57.1136
177.4	-47.1954	-54.657	-57.0984
177.5	-47.2107	-54.7028	-57.0831
177.6	-47.2107	-54.6875	-57.1136
177.7	-47.2107	-54.6722	-57.0679
177.8	-47.1649	-54.6265	-57.0831
177.9	-47.1649	-54.6265	-57.0526
178	-47.1344	-54.657	-56.9916
178.1	-47.1649	-54.657	-57.0374
178.2	-47.2412	-54.6722	-57.0526
178.3	-47.1497	-54.596	-57.0831
178.4	-47.1497	-54.6112	-57.0984
178.5	-47.1497	-54.6112	-57.1136
178.6	-47.1497	-54.596	-57.0679
178.7	-47.1344	-54.5654	-57.1136
178.8	-47.0886	-54.5196	-57.0374
178.9	-47.0429	-54.5654	-57.0679
179	-47.0886	-54.5502	-57.0679
179.1	-47.0429	-54.5349	-57.0221
179.2	-47.0276	-54.4739	-57.0374
179.3	-47.0123	-54.5044	-57.0068
179.4	-46.9665	-54.4586	-57.0068
179.5	-47.0123	-54.4739	-57.0221
179.6	-46.9665	-54.4586	-57.0374
179.7	-46.8903	-54.3823	-56.9916
179.8	-46.9055	-54.3823	-57.0526
179.9	-46.936	-54.3976	-57.0374
180	-46.9055	-54.3976	-57.0679
180.1	-46.875	-54.3671	-57.0831
180.2	-46.814	-54.3213	-57.0526
180.3	-46.814	-54.245	-57.0831
180.4	-46.875	-54.306	-57.0526
180.5	-46.7835	-54.2755	-57.0526
180.6	-46.7224	-54.2602	-57.0221
180.7	-46.7377	-54.2297	-57.0374
180.8	-46.7224	-54.1534	-56.9763
180.9	-46.7071	-54.2297	-57.0068
181	-46.6766	-54.2297	-57.0068
181.1	-46.6003	-54.2145	-56.9458
181.2	-46.6461	-54.184	-56.9763
181.3	-46.6461	-54.184	-56.9153
181.4	-46.6309	-54.1687	-56.9611
181.5	-46.6003	-54.2297	-56.9153
181.6	-46.4935	-54.2297	-56.9153
181.7	-46.5546	-54.184	-56.9
181.8	-46.5546	-54.184	-56.9458
181.9	-46.5088	-54.1229	-56.9153
182	-46.463	-54.184	-56.9153
182.1	-46.402	-54.1992	-56.9611
182.2	-46.4172	-54.1992	-56.9305
182.3	-46.4325	-54.184	-56.9916
182.4	-46.4172	-54.1687	-56.9458
182.5	-46.3562	-54.1382	-56.9763
182.6	-46.3562	-54.1534	-56.9916
182.7	-46.3257	-54.1687	-56.9763
182.8	-46.3562	-54.184	-56.9763
182.9	-46.3867	-54.1687	-57.0221
183	-46.3257	-54.0924	-56.9916
183.1	-46.3562	-54.0924	-57.0526
183.2	-46.3104	-54.0772	-57.0526
183.3	-46.3104	-54.1077	-57.0221
183.4	-46.3409	-54.1534	-57.0831
183.5	-46.3562	-54.1382	-57.0374
183.6	-46.3257	-54.1077	-57.0374
183.7	-46.3104	-54.0924	-57.0526
183.8	-46.2799	-54.0314	-57.0221
183.9	-46.3409	-54.0314	-57.0374
184	-46.402	-54.0924	-57.0374
184.1	-46.3562	-54.0466	-57.0221
184.2	-46.3562	-54.0314	-57.0068
184.3	-46.3409	-53.9856	-57.0221
184.4	-46.3257	-53.9398	-56.9611
184.5	-46.3867	-53.9551	-57.0068
184.6	-46.4325	-53.9398	-56.9763
184.7	-46.4172	-53.9703	-56.9611
184.8	-46.463	-53.9246	-56.9611
184.9	-46.402	-53.9246	-56.9611
185	-46.3715	-53.8635	-56.9916
185.1	-46.4325	-53.8635	-57.0068
185.2	-46.4172	-53.7872	-57.0068
185.3	-46.4325	-53.8025	-56.9763
185.4	-46.3867	-53.833	-57.0068
185.5	-46.3257	-53.8025	-56.9305
185.6	-46.2952	-53.8025	-57.0068
185.7	-46.3104	-53.7415	-57.0221
185.8	-46.2952	-53.7262	-56.9763
185.9	-46.3104	-53.6804	-56.9916
186	-46.2799	-53.6652	-56.9458
186.1	-46.2189	-53.6499	-57.0068
186.2	-46.2036	-53.6804	-56.9916
186.3	-46.1273	-53.6804	-56.9305
186.4	-46.1578	-53.6346	-56.9153
186.5	-46.1883	-53.6804	-56.9763
186.6	-46.1121	-53.5736	-56.9458
186.7	-46.1273	-53.5583	-56.9305
186.8	-46.0815	-53.5126	-56.9
186.9	-46.0205	-53.5278	-56.8695
187	-46.0052	-53.5126	-56.9305
187.1	-46.0358	-53.5278	-56.9
187.2	-46.0052	-53.4973	-56.8848
187.3	-46.0358	-53.5126	-56.839
187.4	-45.9747	-53.4821	-56.8695
187.5	-45.929	-53.421	-56.8848
187.6	-45.9137	-53.3905	-56.8848
187.7	-45.8527	-53.3447	-56.8237
187.8	-45.9137	-53.36	-56.8237
187.9	-45.929	-53.3447	-56.9153
188	-45.9137	-53.3447	-56.839
188.1	-45.8832	-53.3295	-56.8237
188.2	-45.8832	-53.3142	-56.7627
188.3	-45.8069	-53.2989	-56.7779
188.4	-45.8069	-53.3142	-56.839
188.5	-45.7764	-53.2684	-56.8237
188.6	-45.7458	-53.2379	-56.839
188.7	-45.8069	-53.2379	-56.7779
188.8	-45.7306	-53.1921	-56.7779
188.9	-45.7611	-53.2227	-56.839
189	-45.7458	-53.2379	-56.8695
189.1	-45.6696	-53.2379	-56.7779
189.2	-45.6543	-53.2227	-56.7627
189.3	-45.6543	-53.2074	-56.7779
189.4	-45.5627	-53.2074	-56.8085
189.5	-45.6085	-53.1616	-56.8695
189.6	-45.6238	-53.1311	-56.8237
189.7	-45.5933	-53.1158	-56.8237
189.8	-45.6238	-53.1006	-56.8085
189.9	-45.5475	-53.0701	-56.8237
190	-45.5322	-53.0701	-56.8543
190.1	-45.4864	-53.0853	-56.8695
190.2	-45.4559	-53.1006	-56.8085
190.3	-45.4407	-53.1311	-56.8085
190.4	-45.4559	-53.1006	-56.8237
190.5	-45.4407	-53.1158	-56.8085
190.6	-45.4559	-53.0701	-56.8543
190.7	-45.4712	-53.0701	-56.8543
190.8	-45.4254	-53.0395	-56.8543
190.9	-45.4559	-53.0701	-56.839
191	-45.3796	-53.0395	-56.8237
191.1	-45.3796	-53.0243	-56.8848
191.2	-45.3949	-53.0395	-56.9153
191.3	-45.3491	-53.0243	-56.8695
191.4	-45.3491	-53.0395	-56.8543
191.5	-45.3339	-53.0395	-56.8695
191.6	-45.3186	-53.0548	-56.7932
191.7	-45.3339	-53.009	-56.8695
191.8	-45.3491	-53.0243	-56.8695
191.9	-45.2728	-53.009	-56.8543
192	-45.2881	-53.0243	-56.8543
192.1	-45.2576	-53.009	-56.8237
192.2	-45.1965	-52.9938	-56.8237
192.3	-45.227	-53.009	-56.8543
192.4	-45.105	-52.948	-56.8543
192.5	-45.1202	-52.9633	-56.839
192.6	-45.0592	-52.9175	-56.8543
192.7	-45.0134	-52.9022	-56.7932
192.8	-44.9829	-52.8565	-56.7779
192.9	-44.9676	-52.8412	-56.7779
193	-44.9066	-52.8107	-56.7932
193.1	-44.8761	-52.7954	-56.8085
193.2	-44.8608	-52.8107	-56.7779
193.3	-44.7693	-52.7801	-56.7627
193.4	-44.7846	-52.8107	-56.7169
193.5	-44.6777	-52.7954	-56.7169
193.6	-44.6777	-52.8107	-56.7169
193.7	-44.6014	-52.8412	-56.7627
193.8	-44.5404	-52.8717	-56.7169
193.9	-44.5404	-52.887	-56.7627
194	-44.4641	-52.887	-56.7627
194.1	-44.3878	-52.9175	-56.7169
194.2	-44.342	-52.9022	-56.7169
194.3	-44.3268	-52.9327	-56.7017
194.4	-44.2657	-52.948	-56.7474
194.5	-44.2657	-52.9633	-56.7932
194.6	-44.2047	-52.9633	-56.7932
194.7	-44.2047	-52.9785	-56.7779
194.8	-44.1742	-52.9938	-56.8237
194.9	-44.0826	-52.9633	-56.7627
195	-44.0674	-52.9938	-56.7932
195.1	-44.0369	-52.9785	-56.8085
195.2	-43.9911	-52.9938	-56.8085
195.3	-43.9758	-52.9633	-56.8695
195.4	-43.9301	-52.9785	-56.8237
195.5	-43.8538	-53.009	-56.8695
195.6	-43.869	-52.9785	-56.839
195.7	-43.808	-52.9633	-56.8543
195.8	-43.7775	-52.9785	-56.8237
195.9	-43.7622	-52.9938	-56.8543
196	-43.6554	-52.9785	-56.8543
196.1	-43.6554	-52.9938	-56.8695
196.2	-43.6096	-52.948	-56.9305
196.3	-43.5486	-52.9633	-56.9305
196.4	-43.4875	-52.9175	-56.9763
196.5	-43.457	-52.9022	-56.9611
196.6	-43.3502	-52.8565	-56.9611
196.7	-43.3502	-52.8412	-56.9458
196.8	-43.2587	-52.8565	-56.9458
196.9	-43.1671	-52.8565	-56.9458
197	-43.1824	-52.8717	-56.9763
197.1	-43.0756	-52.8412	-56.9763
197.2	-43.0603	-52.8565	-57.0068
197.3	-43.0603	-52.7954	-57.0679
197.4	-42.9993	-52.7649	-57.0374
197.5	-42.984	-52.7649	-57.0526
197.6	-42.9535	-52.7954	-57.0221
197.7	-42.8314	-52.8107	-57.0374
197.8	-42.7704	-52.7649	-57.0526
197.9	-42.6941	-52.7039	-57.0374
198	-42.6025	-52.7496	-57.0526
198.1	-42.572	-52.7649	-57.0984
198.2	-42.4957	-52.7039	-57.1136
198.3	-42.4194	-52.7039	-57.1289
198.4	-42.3126	-52.6886	-57.1899
198.5	-42.1753	-52.7344	-57.1594
198.6	-42.1143	-52.7649	-57.1899
198.7	-42.0532	-52.7191	-57.1899
198.8	-41.9312	-52.7344	-57.1899
198.9	-41.8091	-52.7496	-57.1899
199	-41.7175	-52.7649	-57.1747
199.1	-41.5955	-52.7496	-57.1747
199.2	-41.5497	-52.7039	-57.1899
199.3	-41.3666	-52.6886	-57.1747
199.4	-41.2293	-52.7496	-57.1899
199.5	-41.1529	-52.7344	-57.2205
199.6	-41.0156	-52.6581	-57.1899
199.7	-40.8783	-52.6581	-57.2357
199.8	-40.7257	-52.6123	-57.2357
[truncated: 38,032 more rows]

## Sheet: B ii
ACSF	ZD7288
24.24	0.09
15.48	4.028
12.6	1.05
25.18	11.57
