# Supplementary material for: The cation channel mechanisms of subthreshold inward depolarizing currents in the mice VTA dopaminergic neurons and their roles in the chronic-stress-induced depression-like behavior
Source: eLife. 2024 Dec 6;12:RP88319. doi: 10.7554/eLife.88319 (PMC11623934; doi:10.7554/eLife.88319)
Supplement: Figure 2—figure supplement 3—source data 3. [file elife-88319-fig2-figsupp3-data3.xlsx]

## Sheet: C i
Time (min)	Firing rate (Hz)
0.34	1.71569
0.68	2.45098
1.02	2.7451
1.36	2.9902
1.7	3.03922
2.04	2.7451
2.38	2.69608
2.72	2.7451
3.06	2.79412
3.4	2.69608
3.74	2.64706
4.08	2.59804
4.42	2.69608
4.76	2.64706
5.1	2.69608
5.44	2.59804
5.78	2.59804
6.12	2.59804
6.46	2.64706
6.8	2.54902
7.14	2.54902
7.48	2.69608
7.82	2.5
8.16	2.59804
8.5	2.5
8.84	2.59804
9.18	2.5
9.52	2.40196
9.86	2.40196
10.2	2.45098
10.54	2.45098
10.88	2.45098
11.22	2.40196
11.56	2.5
11.9	2.54902
12.24	2.40196
12.58	2.40196
12.92	2.35294
13.26	2.40196
13.6	2.35294
13.94	2.35294
14.28	2.2549
14.62	2.30392
14.96	2.35294
15.3	2.35294
15.64	2.40196
15.98	2.35294
16.32	2.40196
16.66	2.40196
17	2.35294
17.34	2.40196
17.68	2.40196
18.02	2.45098
18.36	2.45098
18.7	2.45098
19.04	2.45098
19.38	2.5
19.72	2.45098
20.06	2.5
20.4	2.5
20.74	2.45098
21.08	2.54902
21.42	2.45098
21.76	2.54902
22.1	2.54902
22.44	2.59804
22.78	2.54902
23.12	2.54902
23.46	2.69608
23.8	2.64706
24.14	2.79412
24.48	2.69608
24.82	2.7451
25.16	2.7451
25.5	2.79412
25.84	2.69608
26.18	2.84314
26.52	2.59804
26.86	2.54902
27.2	2.54902
27.54	2.54902
27.88	2.64706
28.22	2.64706
28.56	2.59804
28.9	2.59804
29.24	2.54902
29.58	2.59804
29.92	2.45098
30.26	2.54902
30.6	2.54902
30.94	2.59804
31.28	2.64706
31.62	2.69608
31.96	2.7451
32.3	2.7451
32.64	2.79412
32.98	2.69608
33.32	2.54902
33.66	2.7451
34	2.7451

## Sheet: C ii
ACSF	CsCl	ACSF
2.23	3.87	3.45
2.35	2.045	2.23
1.35	1.42	1
1.35	1.22	2.36
1.64	1.74	1.92
2.26	2.08	3.25
2.55	2.61	3
