# Supplementary material for: The cation channel mechanisms of subthreshold inward depolarizing currents in the mice VTA dopaminergic neurons and their roles in the chronic-stress-induced depression-like behavior
Source: eLife. 2024 Dec 6;12:RP88319. doi: 10.7554/eLife.88319 (PMC11623934; doi:10.7554/eLife.88319)
Supplement: Figure 2—figure supplement 3—source data 4. [file elife-88319-fig2-figsupp3-data4.xlsx]

## Sheet: D i
Time (min)	Firing rate (Hz)
0.5	0.9
1	0.9
1.5	0.83333
2	0.73333
2.5	0.76667
3	0.76667
3.5	0.73333
4	0.83333
4.5	0.8
5	0.8
5.5	0.76667
6	0.73333
6.5	0.76667
7	0.8
7.5	0.8
8	0.83333
8.5	0.76667
9	0.76667
9.5	0.8
10	0.73333
10.5	0.76667
11	0.8
11.5	0.86667
12	0.76667
12.5	0.83333
13	0.9
13.5	0.93333
14	0.86667
14.5	0.8
15	0.83333
15.5	0.76667
16	0.73333
16.5	0.83333
17	0.86667
17.5	0.86667
18	0.83333
18.5	0.8
19	0.83333
19.5	0.8
20	0.8
20.5	0.8
21	0.73333
21.5	0.73333
22	0.73333
22.5	0.8
23	0.83333
23.5	0.7
24	0.73333
24.5	0.73333
25	0.8
25.5	0.76667
26	0.76667
26.5	0.73333
27	0.7
27.5	0.7
28	0.73333
28.5	0.76667
29	0.66667
29.5	0.8
30	0.8
30.5	0.73333
31	0.66667
31.5	0.73333
32	0.8
32.5	0.73333
33	0.7
33.5	0.86667
34	0.73333
34.5	0.76667
35	0.73333
35.5	0.73333
36	0.93333
36.5	0.76667
37	0.7
37.5	0.7
38	0.63333
38.5	0.66667
39	0.6
39.5	0.66667
40	0.66667
40.5	0.73333
41	0.66667
41.5	0.66667
42	0.63333
42.5	0.6
43	0.66667
43.5	0.7
44	0.66667
44.5	0.7
45	0.73333
45.5	0.76667
46	0.8
46.5	0.8
47	0.76667
47.5	0.7
48	0.66667
48.5	0.7
49	0.7

## Sheet:  D ii
ACSF	ZD7288	ACSF
2.18	2.2	2
3.26	3.17	3.57
3.11	3.01	2.9
0.81	0.775	0.775
2.01	1.94	1.42
2.02	1.55	1.38
0.66	0.77	0.83
2.43	1.13	1.19
0.82	0.51	0.56
1.11	0.9	0.95
1.29	1.76	0.83
0.95	1.08	1.07
0.84	0.69	0.86
