# Supplementary material for: The cation channel mechanisms of subthreshold inward depolarizing currents in the mice VTA dopaminergic neurons and their roles in the chronic-stress-induced depression-like behavior
Source: eLife. 2024 Dec 6;12:RP88319. doi: 10.7554/eLife.88319 (PMC11623934; doi:10.7554/eLife.88319)
Supplement: Figure 2—figure supplement 4—source data 1. [file elife-88319-fig2-figsupp4-data1.xlsx]

## Sheet: A i
Time (min)	Firing rate (Hz)
0.194	1.97595
0.388	2.14777
0.582	2.23368
0.776	1.97595
0.97	2.23368
1.164	2.31959
1.358	2.57732
1.552	2.66323
1.746	2.23368
1.94	2.23368
2.134	2.14777
2.328	2.49141
2.522	2.14777
2.716	2.14777
2.91	2.49141
3.104	2.23368
3.298	2.31959
3.492	2.06186
3.686	2.31959
3.88	2.23368
4.074	2.4055
4.268	2.06186
4.462	2.06186
4.656	1.97595
4.85	2.06186
5.044	2.06186
5.238	2.06186
5.432	2.06186
5.626	2.06186
5.82	2.06186
6.014	2.06186
6.208	2.06186
6.402	2.23368
6.596	2.14777
6.79	2.06186
6.984	2.23368
7.178	2.14777
7.372	2.14777
7.566	2.23368
7.76	2.06186
7.954	2.14777
8.148	1.97595
8.342	2.31959
8.536	2.14777
8.73	2.4055
8.924	2.23368
9.118	2.23368
9.312	2.14777
9.506	2.4055
9.7	2.14777
9.894	2.23368
10.088	2.23368
10.282	1.97595
10.476	2.23368
10.67	2.14777
10.864	2.31959
11.058	2.14777
11.252	2.14777
11.446	1.97595
11.64	2.14777
11.834	2.14777
12.028	2.14777
12.222	2.06186
12.416	1.97595
12.61	2.31959
12.804	2.14777
12.998	2.23368
13.192	2.06186
13.386	2.23368
13.58	2.49141
13.774	2.23368
13.968	2.14777
14.162	2.23368
14.356	2.23368
14.55	2.06186
14.744	2.14777
14.938	2.23368
15.132	2.23368
15.326	2.4055
15.52	2.4055
15.714	2.4055
15.908	2.31959
16.102	2.4055
16.296	2.49141
16.49	2.23368
16.684	2.83505
16.878	2.57732
17.072	2.4055
17.266	2.31959
17.46	2.4055
17.654	2.57732
17.848	2.4055
18.042	2.74914
18.236	2.66323
18.43	2.14777
18.624	2.57732
18.818	2.57732
19.012	2.66323
19.206	2.4055
19.4	2.83505

## Sheet: A ii
ACSF			CsCl
Time (ms)	voltage (mv)		Time (ms)	voltage (mv)
0	-0.67139		0	-0.5188
0.09375	-0.42725		0.125	-0.48828
0.1875	-0.48828		0.1875	-0.57983
0.28125	-0.57983		0.3125	-0.54932
0.40625	-0.5188		0.375	-0.48828
0.5	-0.61035		0.5	-0.57983
0.59375	-0.54932		0.625	-0.5188
0.6875	-0.54932		0.6875	-0.48828
0.78125	-0.48828		0.8125	-0.54932
0.90625	-0.67139		0.875	-0.67139
1	-0.5188		1	-0.54932
1.09375	-0.67139		1.125	-0.7019
1.1875	-0.57983		1.1875	-0.64087
1.28125	-0.54932		1.3125	-0.64087
1.40625	-0.57983		1.375	-0.7019
1.5	-0.61035		1.5	-0.67139
1.59375	-0.45776		1.625	-0.64087
1.6875	-0.64087		1.6875	-0.64087
1.78125	-0.64087		1.8125	-0.76294
1.90625	-0.54932		1.875	-0.64087
2	-0.61035		2	-0.76294
2.09375	-0.57983		2.125	-0.7019
2.1875	-0.57983		2.1875	-0.79346
2.28125	-0.54932		2.3125	-0.73242
2.40625	-0.64087		2.375	-0.64087
2.5	-0.67139		2.5	-0.61035
2.59375	-0.57983		2.625	-0.73242
2.6875	-0.54932		2.6875	-0.64087
2.78125	-0.67139		2.8125	-0.7019
2.90625	-0.61035		2.875	-0.7019
3	-0.57983		3	-0.57983
3.09375	-0.64087		3.125	-0.67139
3.1875	-0.64087		3.1875	-0.73242
3.28125	-0.48828		3.3125	-0.64087
3.40625	-0.57983		3.375	-0.5188
3.5	-0.64087		3.5	-0.7019
3.59375	-0.57983		3.625	-0.5188
3.6875	-0.57983		3.6875	-0.64087
3.78125	-0.64087		3.8125	-0.64087
3.90625	-0.57983		3.875	-0.64087
4	-0.54932		4	-0.61035
4.09375	-0.64087		4.125	-0.54932
4.1875	-0.5188		4.1875	-0.61035
4.28125	-0.61035		4.3125	-0.5188
4.40625	-0.45776		4.375	-0.57983
4.5	-0.61035		4.5	-0.48828
4.59375	-0.57983		4.625	-0.67139
4.6875	-0.54932		4.6875	-0.48828
4.78125	-0.61035		4.8125	-0.61035
4.90625	-0.57983		4.875	-0.64087
5	-0.5188		5	-0.54932
5.09375	-0.5188		5.125	-0.61035
5.1875	-0.64087		5.1875	-0.54932
5.28125	-0.45776		5.3125	-0.54932
5.40625	-0.54932		5.375	-0.54932
5.5	-0.57983		5.5	-0.57983
5.59375	-0.5188		5.625	-0.57983
5.6875	-0.54932		5.6875	-0.5188
5.78125	-0.57983		5.8125	-0.67139
5.90625	-0.54932		5.875	-0.57983
6	-0.5188		6	-0.57983
6.09375	-0.5188		6.125	-0.5188
6.1875	-0.42725		6.1875	-0.54932
6.28125	-0.48828		6.3125	-0.5188
6.40625	-0.45776		6.375	-0.48828
6.5	-0.64087		6.5	-0.61035
6.59375	-0.57983		6.625	-0.54932
6.6875	-0.45776		6.6875	-0.5188
6.78125	-0.54932		6.8125	-0.57983
6.90625	-0.5188		6.875	-0.61035
7	-0.48828		7	-0.5188
7.09375	-0.45776		7.125	-0.57983
7.1875	-0.54932		7.1875	-0.5188
7.28125	-0.5188		7.3125	-0.5188
7.40625	-0.64087		7.375	-0.5188
7.5	-0.61035		7.5	-0.64087
7.59375	-0.61035		7.625	-0.61035
7.6875	-0.64087		7.6875	-0.64087
7.78125	-0.61035		7.8125	-0.54932
7.90625	-0.61035		7.875	-0.57983
8	-0.61035		8	-0.57983
8.09375	-0.57983		8.125	-0.54932
8.1875	-0.54932		8.1875	-0.57983
8.28125	-0.67139		8.3125	-0.64087
8.40625	-0.64087		8.375	-0.54932
8.5	-0.64087		8.5	-0.73242
8.59375	-0.73242		8.625	-0.61035
8.6875	-0.61035		8.6875	-0.57983
8.78125	-0.73242		8.8125	-0.61035
8.90625	-0.61035		8.875	-0.67139
9	-0.54932		9	-0.5188
9.09375	-0.64087		9.125	-0.61035
9.1875	-0.67139		9.1875	-0.64087
9.28125	-0.67139		9.3125	-0.5188
9.40625	-0.61035		9.375	-0.64087
9.5	-0.73242		9.5	-0.64087
9.59375	-0.57983		9.625	-0.7019
9.6875	-0.7019		9.6875	-0.67139
9.78125	-0.61035		9.8125	-0.64087
9.90625	-0.54932		9.875	-0.67139
10	-0.61035		10	-0.54932
10.0938	-0.7019		10.125	-0.48828
10.1875	-0.64087		10.1875	-0.48828
10.2812	-0.73242		10.3125	-0.64087
10.4062	-0.7019		10.375	-0.54932
10.5	-0.64087		10.5	-0.67139
10.5938	-0.67139		10.625	-0.64087
10.6875	-0.54932		10.6875	-0.57983
10.7812	-0.7019		10.8125	-0.57983
10.9062	-0.54932		10.875	-0.5188
11	-0.5188		11	-0.5188
11.0938	-0.61035		11.125	-0.45776
11.1875	-0.64087		11.1875	-0.57983
11.2812	-0.61035		11.3125	-0.45776
11.4062	-0.67139		11.375	-0.54932
11.5	-0.64087		11.5	-0.48828
11.5938	-0.45776		11.625	-0.61035
11.6875	-0.57983		11.6875	-0.57983
11.7812	-0.57983		11.8125	-0.45776
11.9062	-0.48828		11.875	-0.45776
12	-0.57983		12	-0.45776
12.0938	-0.67139		12.125	-0.5188
12.1875	-0.54932		12.1875	-0.48828
12.2812	-0.5188		12.3125	-0.67139
12.4062	-0.54932		12.375	-0.5188
12.5	-0.54932		12.5	-0.54932
12.5938	-0.64087		12.625	-0.57983
12.6875	-0.48828		12.6875	-0.45776
12.7812	-0.64087		12.8125	-0.5188
12.9062	-0.61035		12.875	-0.54932
13	-0.57983		13	-0.54932
13.0938	-0.64087		13.125	-0.48828
13.1875	-0.61035		13.1875	-0.64087
13.2812	-0.54932		13.3125	-0.54932
13.4062	-0.61035		13.375	-0.67139
13.5	-0.57983		13.5	-0.61035
13.5938	-0.54932		13.625	-0.57983
13.6875	-0.5188		13.6875	-0.54932
13.7812	-0.7019		13.8125	-0.48828
13.9062	-0.45776		13.875	-0.61035
14	-0.57983		14	-0.54932
14.0938	-0.57983		14.125	-0.57983
14.1875	-0.61035		14.1875	-0.61035
14.2812	-0.64087		14.3125	-0.73242
14.4062	-0.57983		14.375	-0.57983
14.5	-0.64087		14.5	-0.61035
14.5938	-0.5188		14.625	-0.76294
14.6875	-0.61035		14.6875	-0.57983
14.7812	-0.57983		14.8125	-0.61035
14.9062	-0.7019		14.875	-0.67139
15	-0.5188		15	-0.61035
15.0938	-0.64087		15.125	-0.64087
15.1875	-0.7019		15.1875	-0.67139
15.2812	-0.57983		15.3125	-0.64087
15.4062	-0.7019		15.375	-0.67139
15.5	-0.61035		15.5	-0.61035
15.5938	-0.64087		15.625	-0.54932
15.6875	-0.57983		15.6875	-0.57983
15.7812	-0.7019		15.8125	-0.5188
15.9062	-0.54932		15.875	-0.67139
16	-0.67139		16	-0.64087
16.0938	-0.67139		16.125	-0.64087
16.1875	-0.67139		16.1875	-0.54932
16.2812	-0.73242		16.3125	-0.57983
16.4062	-0.7019		16.375	-0.54932
16.5	-0.61035		16.5	-0.54932
16.5938	-0.7019		16.625	-0.57983
16.6875	-0.54932		16.6875	-0.54932
16.7812	-0.7019		16.8125	-0.64087
16.9062	-0.61035		16.875	-0.57983
17	-0.67139		17	-0.61035
17.0938	-0.54932		17.125	-0.57983
17.1875	-0.67139		17.1875	-0.64087
17.2812	-0.64087		17.3125	-0.61035
17.4062	-0.57983		17.375	-0.54932
17.5	-0.67139		17.5	-0.5188
17.5938	-0.54932		17.625	-0.48828
17.6875	-0.57983		17.6875	-0.61035
17.7812	-0.61035		17.8125	-0.45776
17.9062	-0.54932		17.875	-0.67139
18	-0.67139		18	-0.64087
18.0938	-0.61035		18.125	-0.57983
18.1875	-0.5188		18.1875	-0.64087
18.2812	-0.61035		18.3125	-0.64087
18.4062	-0.5188		18.375	-0.57983
18.5	-0.54932		18.5	-0.5188
18.5938	-0.61035		18.625	-0.54932
18.6875	-0.57983		18.6875	-0.45776
18.7812	-0.5188		18.8125	-0.61035
18.9062	-0.61035		18.875	-0.61035
19	-0.61035		19	-0.57983
19.0938	-0.57983		19.125	-0.57983
19.1875	-0.5188		19.1875	-0.64087
19.2812	-0.5188		19.3125	-0.54932
19.4062	-0.61035		19.375	-0.64087
19.5	-0.5188		19.5	-0.5188
19.5938	-0.5188		19.625	-0.54932
19.6875	-0.67139		19.6875	-0.54932
19.7812	-0.61035		19.8125	-0.57983
19.9062	-0.48828		19.875	-0.64087
20	-0.5188		20	-0.64087
20.0938	-0.57983		20.125	-0.61035
20.1875	-0.54932		20.1875	-0.57983
20.2812	-0.54932		20.3125	-0.7019
20.4062	-0.61035		20.375	-0.45776
20.5	-0.48828		20.5	-0.61035
20.5938	-0.61035		20.625	-0.61035
20.6875	-0.61035		20.6875	-0.64087
20.7812	-0.54932		20.8125	-0.64087
20.9062	-0.57983		20.875	-0.64087
21	-0.5188		21	-0.67139
21.0938	-0.64087		21.125	-0.61035
21.1875	-0.45776		21.1875	-0.7019
21.2812	-0.5188		21.3125	-0.54932
21.4062	-0.57983		21.375	-0.7019
21.5	-0.64087		21.5	-0.5188
21.5938	-0.5188		21.625	-0.61035
21.6875	-0.64087		21.6875	-0.64087
21.7812	-0.67139		21.8125	-0.61035
21.9062	-0.48828		21.875	-0.67139
22	-0.67139		22	-0.7019
22.0938	-0.67139		22.125	-0.54932
22.1875	-0.57983		22.1875	-0.64087
22.2812	-0.54932		22.3125	-0.61035
22.4062	-0.7019		22.375	-0.57983
22.5	-0.57983		22.5	-0.57983
22.5938	-0.61035		22.625	-0.76294
22.6875	-0.64087		22.6875	-0.48828
22.7812	-0.61035		22.8125	-0.67139
22.9062	-0.61035		22.875	-0.67139
23	-0.45776		23	-0.64087
23.0938	-0.57983		23.125	-0.67139
23.1875	-0.61035		23.1875	-0.54932
23.2812	-0.57983		23.3125	-0.48828
23.4062	-0.67139		23.375	-0.64087
23.5	-0.67139		23.5	-0.54932
23.5938	-0.57983		23.625	-0.5188
23.6875	-0.61035		23.6875	-0.64087
23.7812	-0.64087		23.8125	-0.48828
23.9062	-0.48828		23.875	-0.5188
24	-0.61035		24	-0.5188
24.0938	-0.61035		24.125	-0.48828
24.1875	-0.54932		24.1875	-0.5188
24.2812	-0.57983		24.3125	-0.61035
24.4062	-0.64087		24.375	-0.45776
24.5	-0.57983		24.5	-0.54932
24.5938	-0.57983		24.625	-0.61035
24.6875	-0.61035		24.6875	-0.5188
24.7812	-0.5188		24.8125	-0.48828
24.9062	-0.67139		24.875	-0.5188
25	-0.45776		25	-0.42725
25.0938	-0.57983		25.125	-0.5188
25.1875	-0.54932		25.1875	-0.39673
25.2812	-0.57983		25.3125	-0.5188
25.4062	-0.57983		25.375	-0.5188
25.5	-0.57983		25.5	-0.57983
25.5938	-0.5188		25.625	-0.54932
25.6875	-0.42725		25.6875	-0.57983
25.7812	-0.48828		25.8125	-0.57983
25.9062	-0.48828		25.875	-0.5188
26	-0.5188		26	-0.54932
26.0938	-0.61035		26.125	-0.45776
26.1875	-0.48828		26.1875	-0.54932
26.2812	-0.54932		26.3125	-0.57983
26.4062	-0.54932		26.375	-0.61035
26.5	-0.48828		26.5	-0.57983
26.5938	-0.48828		26.625	-0.57983
26.6875	-0.54932		26.6875	-0.54932
26.7812	-0.36621		26.8125	-0.54932
26.9062	-0.54932		26.875	-0.57983
27	-0.5188		27	-0.45776
27.0938	-0.5188		27.125	-0.57983
27.1875	-0.57983		27.1875	-0.48828
27.2812	-0.61035		27.3125	-0.61035
27.4062	-0.64087		27.375	-0.64087
27.5	-0.54932		27.5	-0.57983
27.5938	-0.48828		27.625	-0.64087
27.6875	-0.48828		27.6875	-0.61035
27.7812	-0.54932		27.8125	-0.57983
27.9062	-0.54932		27.875	-0.5188
28	-0.64087		28	-0.57983
28.0938	-0.7019		28.125	-0.48828
28.1875	-0.64087		28.1875	-0.67139
28.2812	-0.76294		28.3125	-0.57983
28.4062	-0.73242		28.375	-0.64087
28.5	-0.64087		28.5	-0.64087
28.5938	-0.64087		28.625	-0.57983
28.6875	-0.67139		28.6875	-0.57983
28.7812	-0.57983		28.8125	-0.54932
28.9062	-0.64087		28.875	-0.57983
29	-0.64087		29	-0.48828
29.0938	-0.67139		29.125	-0.67139
29.1875	-0.67139		29.1875	-0.48828
29.2812	-0.7019		29.3125	-0.64087
29.4062	-0.73242		29.375	-0.61035
29.5	-0.57983		29.5	-0.54932
29.5938	-0.61035		29.625	-0.54932
29.6875	-0.61035		29.6875	-0.54932
29.7812	-0.64087		29.8125	-0.5188
29.9062	-0.61035		29.875	-0.48828
30	-0.67139		30	-0.54932
30.0938	-0.7019		30.125	-0.48828
30.1875	-0.61035		30.1875	-0.61035
30.2812	-0.7019		30.3125	-0.64087
30.4062	-0.79346		30.375	-0.54932
30.5	-0.61035		30.5	-0.54932
30.5938	-0.7019		30.625	-0.5188
30.6875	-0.61035		30.6875	-0.5188
30.7812	-0.57983		30.8125	-0.45776
30.9062	-0.57983		30.875	-0.5188
31	-0.64087		31	-0.48828
31.0938	-0.67139		31.125	-0.67139
31.1875	-0.61035		31.1875	-0.48828
31.2812	-0.61035		31.3125	-0.54932
31.4062	-0.61035		31.375	-0.5188
31.5	-0.7019		31.5	-0.45776
31.5938	-0.5188		31.625	-0.42725
31.6875	-0.7019		31.6875	-0.54932
31.7812	-0.61035		31.8125	-0.48828
31.9062	-0.54932		31.875	-0.5188
32	-0.64087		32	-0.57983
32.0938	-0.67139		32.125	-0.5188
32.1875	-0.61035		32.1875	-0.5188
32.2812	-0.54932		32.3125	-0.54932
32.4062	-0.73242		32.375	-0.5188
32.5	-0.45776		32.5	-0.57983
32.5938	-0.64087		32.625	-0.48828
32.6875	-0.61035		32.6875	-0.5188
32.7812	-0.61035		32.8125	-0.5188
32.9062	-0.64087		32.875	-0.57983
33	-0.57983		33	-0.54932
33.0938	-0.61035		33.125	-0.64087
33.1875	-0.57983		33.1875	-0.57983
33.2812	-0.5188		33.3125	-0.5188
33.4062	-0.61035		33.375	-0.64087
33.5	-0.61035		33.5	-0.5188
33.5938	-0.64087		33.625	-0.57983
33.6875	-0.54932		33.6875	-0.5188
33.7812	-0.64087		33.8125	-0.54932
33.9062	-0.5188		33.875	-0.61035
34	-0.64087		34	-0.7019
34.0938	-0.61035		34.125	-0.57983
34.1875	-0.57983		34.1875	-0.64087
34.2812	-0.57983		34.3125	-0.67139
34.4062	-0.64087		34.375	-0.5188
34.5	-0.5188		34.5	-0.64087
34.5938	-0.64087		34.625	-0.54932
34.6875	-0.64087		34.6875	-0.64087
34.7812	-0.57983		34.8125	-0.64087
34.9062	-0.64087		34.875	-0.61035
35	-0.57983		35	-0.57983
35.0938	-0.64087		35.125	-0.67139
35.1875	-0.7019		35.1875	-0.54932
35.2812	-0.64087		35.3125	-0.5188
35.4062	-0.54932		35.375	-0.61035
35.5	-0.64087		35.5	-0.5188
35.5938	-0.64087		35.625	-0.64087
35.6875	-0.64087		35.6875	-0.64087
35.7812	-0.7019		35.8125	-0.64087
35.9062	-0.64087		35.875	-0.61035
36	-0.67139		36	-0.7019
36.0938	-0.67139		36.125	-0.57983
36.1875	-0.54932		36.1875	-0.64087
36.2812	-0.64087		36.3125	-0.54932
36.4062	-0.67139		36.375	-0.61035
36.5	-0.61035		36.5	-0.57983
36.5938	-0.7019		36.625	-0.61035
36.6875	-0.76294		36.6875	-0.54932
36.7812	-0.57983		36.8125	-0.7019
36.9062	-0.61035		36.875	-0.57983
37	-0.76294		37	-0.57983
37.0938	-0.54932		37.125	-0.73242
37.1875	-0.61035		37.1875	-0.5188
37.2812	-0.57983		37.3125	-0.61035
37.4062	-0.61035		37.375	-0.48828
37.5	-0.61035		37.5	-0.54932
37.5938	-0.64087		37.625	-0.54932
37.6875	-0.67139		37.6875	-0.64087
37.7812	-0.54932		37.8125	-0.61035
37.9062	-0.54932		37.875	-0.57983
38	-0.5188		38	-0.7019
38.0938	-0.64087		38.125	-0.48828
38.1875	-0.39673		38.1875	-0.67139
38.2812	-0.57983		38.3125	-0.48828
38.4062	-0.54932		38.375	-0.61035
38.5	-0.48828		38.5	-0.57983
38.5938	-0.5188		38.625	-0.57983
38.6875	-0.64087		38.6875	-0.57983
38.7812	-0.48828		38.8125	-0.64087
38.9062	-0.48828		38.875	-0.54932
39	-0.61035		39	-0.61035
39.0938	-0.42725		39.125	-0.61035
39.1875	-0.42725		39.1875	-0.48828
39.2812	-0.48828		39.3125	-0.48828
39.4062	-0.57983		39.375	-0.61035
39.5	-0.54932		39.5	-0.45776
39.5938	-0.48828		39.625	-0.54932
39.6875	-0.57983		39.6875	-0.57983
39.7812	-0.5188		39.8125	-0.5188
39.9062	-0.48828		39.875	-0.61035
40	-0.54932		40	-0.61035
40.0938	-0.54932		40.125	-0.54932
40.1875	-0.45776		40.1875	-0.61035
40.2812	-0.57983		40.3125	-0.5188
40.4062	-0.54932		40.375	-0.54932
40.5	-0.48828		40.5	-0.61035
40.5938	-0.54932		40.625	-0.61035
40.6875	-0.61035		40.6875	-0.67139
40.7812	-0.54932		40.8125	-0.7019
40.9062	-0.45776		40.875	-0.61035
41	-0.64087		41	-0.57983
41.0938	-0.57983		41.125	-0.61035
41.1875	-0.7019		41.1875	-0.57983
41.2812	-0.61035		41.3125	-0.67139
41.4062	-0.57983		41.375	-0.67139
41.5	-0.61035		41.5	-0.61035
41.5938	-0.48828		41.625	-0.64087
41.6875	-0.57983		41.6875	-0.64087
41.7812	-0.54932		41.8125	-0.61035
41.9062	-0.48828		41.875	-0.67139
42	-0.5188		42	-0.64087
42.0938	-0.64087		42.125	-0.57983
42.1875	-0.57983		42.1875	-0.64087
42.2812	-0.64087		42.3125	-0.7019
42.4062	-0.7019		42.375	-0.57983
42.5	-0.57983		42.5	-0.67139
42.5938	-0.61035		42.625	-0.61035
42.6875	-0.67139		42.6875	-0.64087
42.7812	-0.5188		42.8125	-0.67139
42.9062	-0.61035		42.875	-0.48828
43	-0.64087		43	-0.54932
43.0938	-0.57983		43.125	-0.5188
43.1875	-0.64087		43.1875	-0.64087
43.2812	-0.61035		43.3125	-0.57983
43.4062	-0.54932		43.375	-0.7019
43.5	-0.7019		43.5	-0.54932
43.5938	-0.48828		43.625	-0.57983
43.6875	-0.54932		43.6875	-0.7019
43.7812	-0.5188		43.8125	-0.45776
43.9062	-0.5188		43.875	-0.57983
44	-0.61035		44	-0.5188
44.0938	-0.61035		44.125	-0.57983
44.1875	-0.54932		44.1875	-0.57983
44.2812	-0.61035		44.3125	-0.57983
44.4062	-0.61035		44.375	-0.48828
44.5	-0.48828		44.5	-0.57983
44.5938	-0.64087		44.625	-0.54932
44.6875	-0.54932		44.6875	-0.45776
44.7812	-0.48828		44.8125	-0.5188
44.9062	-0.54932		44.875	-0.42725
45	-0.61035		45	-0.5188
45.0938	-0.57983		45.125	-0.48828
45.1875	-0.64087		45.1875	-0.57983
45.2812	-0.61035		45.3125	-0.48828
45.4062	-0.5188		45.375	-0.57983
45.5	-0.57983		45.5	-0.61035
45.5938	-0.48828		45.625	-0.54932
45.6875	-0.45776		45.6875	-0.54932
45.7812	-0.48828		45.8125	-0.39673
45.9062	-0.57983		45.875	-0.57983
46	-0.57983		46	-0.5188
46.0938	-0.54932		46.125	-0.67139
46.1875	-0.5188		46.1875	-0.54932
46.2812	-0.5188		46.3125	-0.61035
46.4062	-0.57983		46.375	-0.5188
46.5	-0.39673		46.5	-0.54932
46.5938	-0.54932		46.625	-0.5188
46.6875	-0.61035		46.6875	-0.48828
46.7812	-0.42725		46.8125	-0.57983
46.9062	-0.57983		46.875	-0.48828
47	-0.57983		47	-0.61035
47.0938	-0.48828		47.125	-0.61035
47.1875	-0.61035		47.1875	-0.61035
47.2812	-0.57983		47.3125	-0.64087
47.4062	-0.54932		47.375	-0.64087
47.5	-0.45776		47.5	-0.57983
47.5938	-0.61035		47.625	-0.57983
47.6875	-0.48828		47.6875	-0.64087
47.7812	-0.64087		47.8125	-0.5188
47.9062	-0.5188		47.875	-0.64087
48	-0.64087		48	-0.61035
48.0938	-0.61035		48.125	-0.61035
48.1875	-0.54932		48.1875	-0.57983
48.2812	-0.73242		48.3125	-0.5188
48.4062	-0.54932		48.375	-0.54932
48.5	-0.67139		48.5	-0.64087
48.5938	-0.54932		48.625	-0.57983
48.6875	-0.73242		48.6875	-0.61035
48.7812	-0.61035		48.8125	-0.64087
48.9062	-0.67139		48.875	-0.54932
49	-0.73242		49	-0.67139
49.0938	-0.64087		49.125	-0.64087
49.1875	-0.67139		49.1875	-0.54932
49.2812	-0.61035		49.3125	-0.64087
49.4062	-0.73242		49.375	-0.61035
49.5	-0.57983		49.5	-0.54932
49.5938	-0.73242		49.625	-0.57983
49.6875	-0.73242		49.6875	-0.61035
49.7812	-0.61035		49.8125	-0.5188
49.9062	-0.61035		49.875	-0.64087
50	-0.64087		50	-0.5188
50.0938	-0.64087		50.125	-0.57983
50.1875	-0.64087		50.1875	-0.64087
50.2812	-0.57983		50.3125	-0.57983
50.4062	-0.64087		50.375	-0.5188
50.5	-0.54932		50.5	-0.5188
50.5938	-0.7019		50.625	-0.5188
50.6875	-0.61035		50.6875	-0.5188
50.7812	-0.67139		50.8125	-0.64087
50.9062	-0.57983		50.875	-0.54932
51	-0.7019		51	-0.61035
51.0938	-0.54932		51.125	-0.57983
51.1875	-0.61035		51.1875	-0.5188
51.2812	-0.57983		51.3125	-0.54932
51.4062	-0.64087		51.375	-0.48828
51.5	-0.67139		51.5	-0.54932
51.5938	-0.61035		51.625	-0.5188
51.6875	-0.57983		51.6875	-0.57983
51.7812	-0.64087		51.8125	-0.48828
51.9062	-0.67139		51.875	-0.61035
52	-0.61035		52	-0.54932
52.0938	-0.67139		52.125	-0.54932
52.1875	-0.54932		52.1875	-0.5188
52.2812	-0.54932		52.3125	-0.45776
52.4062	-0.57983		52.375	-0.45776
52.5	-0.57983		52.5	-0.61035
52.5938	-0.61035		52.625	-0.5188
52.6875	-0.57983		52.6875	-0.61035
52.7812	-0.61035		52.8125	-0.57983
52.9062	-0.64087		52.875	-0.5188
53	-0.61035		53	-0.64087
53.0938	-0.5188		53.125	-0.54932
53.1875	-0.61035		53.1875	-0.61035
53.2812	-0.61035		53.3125	-0.54932
53.4062	-0.45776		53.375	-0.7019
53.5	-0.61035		53.5	-0.57983
53.5938	-0.64087		53.625	-0.67139
53.6875	-0.5188		53.6875	-0.61035
53.7812	-0.61035		53.8125	-0.64087
53.9062	-0.57983		53.875	-0.73242
54	-0.64087		54	-0.54932
54.0938	-0.54932		54.125	-0.73242
54.1875	-0.54932		54.1875	-0.5188
54.2812	-0.54932		54.3125	-0.67139
54.4062	-0.61035		54.375	-0.54932
54.5	-0.57983		54.5	-0.67139
54.5938	-0.67139		54.625	-0.64087
54.6875	-0.61035		54.6875	-0.67139
54.7812	-0.54932		54.8125	-0.73242
54.9062	-0.7019		54.875	-0.61035
55	-0.61035		55	-0.73242
55.0938	-0.5188		55.125	-0.57983
55.1875	-0.64087		55.1875	-0.67139
55.2812	-0.76294		55.3125	-0.64087
55.4062	-0.61035		55.375	-0.61035
55.5	-0.7019		55.5	-0.7019
55.5938	-0.67139		55.625	-0.61035
55.6875	-0.5188		55.6875	-0.67139
55.7812	-0.64087		55.8125	-0.64087
55.9062	-0.61035		55.875	-0.67139
56	-0.67139		56	-0.61035
56.0938	-0.61035		56.125	-0.54932
56.1875	-0.7019		56.1875	-0.54932
56.2812	-0.7019		56.3125	-0.54932
56.4062	-0.7019		56.375	-0.64087
56.5	-0.57983		56.5	-0.54932
56.5938	-0.67139		56.625	-0.61035
56.6875	-0.7019		56.6875	-0.64087
56.7812	-0.57983		56.8125	-0.7019
56.9062	-0.64087		56.875	-0.54932
57	-0.61035		57	-0.67139
57.0938	-0.64087		57.125	-0.57983
57.1875	-0.64087		57.1875	-0.54932
57.2812	-0.76294		57.3125	-0.57983
57.4062	-0.67139		57.375	-0.57983
57.5	-0.64087		57.5	-0.5188
57.5938	-0.67139		57.625	-0.61035
57.6875	-0.54932		57.6875	-0.57983
57.7812	-0.54932		57.8125	-0.54932
57.9062	-0.54932		57.875	-0.57983
58	-0.54932		58	-0.54932
58.0938	-0.54932		58.125	-0.61035
58.1875	-0.54932		58.1875	-0.64087
58.2812	-0.5188		58.3125	-0.61035
58.4062	-0.57983		58.375	-0.64087
58.5	-0.5188		58.5	-0.61035
58.5938	-0.48828		58.625	-0.57983
58.6875	-0.57983		58.6875	-0.61035
58.7812	-0.42725		58.8125	-0.57983
58.9062	-0.5188		58.875	-0.48828
59	-0.54932		59	-0.57983
59.0938	-0.57983		59.125	-0.64087
59.1875	-0.57983		59.1875	-0.5188
59.2812	-0.61035		59.3125	-0.7019
59.4062	-0.5188		59.375	-0.57983
59.5	-0.57983		59.5	-0.57983
59.5938	-0.5188		59.625	-0.64087
59.6875	-0.54932		59.6875	-0.54932
59.7812	-0.5188		59.8125	-0.57983
59.9062	-0.54932		59.875	-0.54932
60	-0.54932		60	-0.61035
60.0938	-0.64087		60.125	-0.5188
60.1875	-0.57983		60.1875	-0.7019
60.2812	-0.54932		60.3125	-0.54932
60.4062	-0.5188		60.375	-0.64087
60.5	-0.5188		60.5	-0.73242
60.5938	-0.42725		60.625	-0.61035
60.6875	-0.54932		60.6875	-0.64087
60.7812	-0.5188		60.8125	-0.54932
60.9062	-0.57983		60.875	-0.64087
61	-0.61035		61	-0.64087
61.0938	-0.57983		61.125	-0.76294
61.1875	-0.61035		61.1875	-0.61035
61.2812	-0.57983		61.3125	-0.73242
61.4062	-0.61035		61.375	-0.7019
61.5	-0.57983		61.5	-0.61035
61.5938	-0.57983		61.625	-0.67139
61.6875	-0.48828		61.6875	-0.61035
61.7812	-0.64087		61.8125	-0.61035
61.9062	-0.61035		61.875	-0.61035
62	-0.54932		62	-0.67139
62.0938	-0.64087		62.125	-0.54932
62.1875	-0.67139		62.1875	-0.73242
62.2812	-0.57983		62.3125	-0.67139
62.4062	-0.54932		62.375	-0.67139
62.5	-0.57983		62.5	-0.67139
62.5938	-0.57983		62.625	-0.54932
62.6875	-0.61035		62.6875	-0.67139
62.7812	-0.61035		62.8125	-0.61035
62.9062	-0.67139		62.875	-0.64087
63	-0.61035		63	-0.64087
63.0938	-0.5188		63.125	-0.67139
63.1875	-0.64087		63.1875	-0.57983
63.2812	-0.54932		63.3125	-0.64087
63.4062	-0.45776		63.375	-0.54932
63.5	-0.7019		63.5	-0.45776
63.5938	-0.61035		63.625	-0.5188
63.6875	-0.54932		63.6875	-0.48828
63.7812	-0.54932		63.8125	-0.57983
63.9062	-0.61035		63.875	-0.54932
64	-0.5188		64	-0.57983
64.0938	-0.57983		64.125	-0.54932
64.1875	-0.64087		64.1875	-0.54932
64.2812	-0.54932		64.3125	-0.54932
64.4062	-0.64087		64.375	-0.48828
64.5	-0.42725		64.5	-0.45776
64.5938	-0.67139		64.625	-0.42725
64.6875	-0.54932		64.6875	-0.61035
64.7812	-0.54932		64.8125	-0.57983
64.9062	-0.61035		64.875	-0.5188
65	-0.57983		65	-0.54932
65.0938	-0.5188		65.125	-0.48828
65.1875	-0.48828		65.1875	-0.57983
65.2812	-0.57983		65.3125	-0.57983
65.4062	-0.36621		65.375	-0.48828
65.5	-0.7019		65.5	-0.48828
65.5938	-0.61035		65.625	-0.5188
65.6875	-0.54932		65.6875	-0.42725
65.7812	-0.54932		65.8125	-0.54932
65.9062	-0.61035		65.875	-0.5188
66	-0.54932		66	-0.57983
66.0938	-0.48828		66.125	-0.61035
66.1875	-0.61035		66.1875	-0.61035
66.2812	-0.48828		66.3125	-0.5188
66.4062	-0.48828		66.375	-0.54932
66.5	-0.57983		66.5	-0.57983
66.5938	-0.45776		66.625	-0.42725
66.6875	-0.67139		66.6875	-0.64087
66.7812	-0.42725		66.8125	-0.57983
66.9062	-0.61035		66.875	-0.57983
67	-0.54932		67	-0.57983
67.0938	-0.45776		67.125	-0.57983
67.1875	-0.5188		67.1875	-0.57983
67.2812	-0.54932		67.3125	-0.61035
67.4062	-0.57983		67.375	-0.54932
67.5	-0.5188		67.5	-0.45776
67.5938	-0.64087		67.625	-0.61035
67.6875	-0.54932		67.6875	-0.48828
67.7812	-0.57983		67.8125	-0.67139
67.9062	-0.64087		67.875	-0.61035
68	-0.64087		68	-0.57983
68.0938	-0.67139		68.125	-0.57983
68.1875	-0.61035		68.1875	-0.48828
68.2812	-0.54932		68.3125	-0.48828
68.4062	-0.64087		68.375	-0.48828
68.5	-0.61035		68.5	-0.64087
68.5938	-0.64087		68.625	-0.54932
68.6875	-0.73242		68.6875	-0.7019
68.7812	-0.64087		68.8125	-0.67139
68.9062	-0.61035		68.875	-0.61035
69	-0.64087		69	-0.64087
69.0938	-0.57983		69.125	-0.57983
69.1875	-0.67139		69.1875	-0.45776
69.2812	-0.67139		69.3125	-0.64087
69.4062	-0.64087		69.375	-0.54932
69.5	-0.64087		69.5	-0.61035
69.5938	-0.64087		69.625	-0.64087
69.6875	-0.61035		69.6875	-0.61035
69.7812	-0.7019		69.8125	-0.67139
69.9062	-0.7019		69.875	-0.61035
70	-0.5188		70	-0.61035
70.0938	-0.61035		70.125	-0.5188
70.1875	-0.64087		70.1875	-0.67139
70.2812	-0.61035		70.3125	-0.48828
70.4062	-0.67139		70.375	-0.61035
70.5	-0.64087		70.5	-0.57983
70.5938	-0.61035		70.625	-0.54932
70.6875	-0.57983		70.6875	-0.61035
70.7812	-0.67139		70.8125	-0.57983
70.9062	-0.54932		70.875	-0.57983
71	-0.64087		71	-0.48828
71.0938	-0.54932		71.125	-0.61035
71.1875	-0.61035		71.1875	-0.42725
71.2812	-0.54932		71.3125	-0.61035
71.4062	-0.54932		71.375	-0.48828
71.5	-0.61035		71.5	-0.5188
71.5938	-0.57983		71.625	-0.5188
71.6875	-0.61035		71.6875	-0.5188
71.7812	-0.61035		71.8125	-0.54932
71.9062	-0.7019		71.875	-0.42725
72	-0.48828		72	-0.5188
72.0938	-0.61035		72.125	-0.5188
72.1875	-0.64087		72.1875	-0.54932
72.2812	-0.61035		72.3125	-0.5188
72.4062	-0.64087		72.375	-0.45776
72.5	-0.64087		72.5	-0.61035
72.5938	-0.61035		72.625	-0.5188
72.6875	-0.57983		72.6875	-0.54932
72.7812	-0.61035		72.8125	-0.57983
72.9062	-0.61035		72.875	-0.5188
73	-0.64087		73	-0.5188
73.0938	-0.57983		73.125	-0.5188
73.1875	-0.67139		73.1875	-0.54932
73.2812	-0.61035		73.3125	-0.61035
73.4062	-0.54932		73.375	-0.61035
73.5	-0.64087		73.5	-0.64087
73.5938	-0.57983		73.625	-0.64087
73.6875	-0.57983		73.6875	-0.54932
73.7812	-0.54932		73.8125	-0.57983
73.9062	-0.67139		73.875	-0.48828
74	-0.54932		74	-0.57983
74.0938	-0.64087		74.125	-0.61035
74.1875	-0.64087		74.1875	-0.67139
74.2812	-0.61035		74.3125	-0.64087
74.4062	-0.64087		74.375	-0.64087
74.5	-0.57983		74.5	-0.64087
74.5938	-0.57983		74.625	-0.57983
74.6875	-0.54932		74.6875	-0.64087
74.7812	-0.54932		74.8125	-0.57983
74.9062	-0.61035		74.875	-0.54932
75	-0.7019		75	-0.67139
75.0938	-0.57983		75.125	-0.67139
75.1875	-0.67139		75.1875	-0.7019
75.2812	-0.67139		75.3125	-0.64087
75.4062	-0.54932		75.375	-0.64087
75.5	-0.67139		75.5	-0.67139
75.5938	-0.64087		75.625	-0.64087
75.6875	-0.57983		75.6875	-0.54932
75.7812	-0.67139		75.8125	-0.64087
75.9062	-0.67139		75.875	-0.57983
76	-0.61035		76	-0.5188
76.0938	-0.61035		76.125	-0.64087
76.1875	-0.73242		76.1875	-0.64087
76.2812	-0.67139		76.3125	-0.57983
76.4062	-0.7019		76.375	-0.67139
76.5	-0.7019		76.5	-0.67139
76.5938	-0.64087		76.625	-0.64087
76.6875	-0.67139		76.6875	-0.54932
76.7812	-0.61035		76.8125	-0.57983
76.9062	-0.61035		76.875	-0.54932
77	-0.67139		77	-0.67139
77.0938	-0.61035		77.125	-0.57983
77.1875	-0.64087		77.1875	-0.67139
77.2812	-0.64087		77.3125	-0.57983
77.4062	-0.5188		77.375	-0.61035
77.5	-0.64087		77.5	-0.67139
77.5938	-0.57983		77.625	-0.54932
77.6875	-0.54932		77.6875	-0.57983
77.7812	-0.61035		77.8125	-0.5188
77.9062	-0.64087		77.875	-0.5188
78	-0.54932		78	-0.54932
78.0938	-0.64087		78.125	-0.73242
78.1875	-0.67139		78.1875	-0.57983
78.2812	-0.42725		78.3125	-0.57983
78.4062	-0.57983		78.375	-0.64087
78.5	-0.48828		78.5	-0.57983
78.5938	-0.45776		78.625	-0.5188
78.6875	-0.54932		78.6875	-0.54932
78.7812	-0.57983		78.8125	-0.57983
78.9062	-0.48828		78.875	-0.45776
79	-0.61035		79	-0.61035
79.0938	-0.64087		79.125	-0.5188
79.1875	-0.45776		79.1875	-0.5188
79.2812	-0.54932		79.3125	-0.57983
79.4062	-0.45776		79.375	-0.5188
79.5	-0.57983		79.5	-0.54932
79.5938	-0.5188		79.625	-0.5188
79.6875	-0.54932		79.6875	-0.57983
79.7812	-0.57983		79.8125	-0.54932
79.9062	-0.64087		79.875	-0.7019
80	-0.54932		80	-0.54932
80.0938	-0.61035		80.125	-0.67139
80.1875	-0.54932		80.1875	-0.64087
80.2812	-0.5188		80.3125	-0.54932
80.4062	-0.54932		80.375	-0.64087
80.5	-0.67139		80.5	-0.57983
80.5938	-0.48828		80.625	-0.54932
80.6875	-0.57983		80.6875	-0.5188
80.7812	-0.61035		80.8125	-0.64087
80.9062	-0.54932		80.875	-0.61035
81	-0.64087		81	-0.67139
81.0938	-0.54932		81.125	-0.64087
81.1875	-0.7019		81.1875	-0.61035
81.2812	-0.57983		81.3125	-0.64087
81.4062	-0.64087		81.375	-0.61035
81.5	-0.54932		81.5	-0.64087
81.5938	-0.57983		81.625	-0.67139
81.6875	-0.5188		81.6875	-0.61035
81.7812	-0.54932		81.8125	-0.67139
81.9062	-0.64087		81.875	-0.67139
82	-0.5188		82	-0.57983
82.0938	-0.64087		82.125	-0.61035
82.1875	-0.54932		82.1875	-0.61035
82.2812	-0.54932		82.3125	-0.57983
82.4062	-0.5188		82.375	-0.64087
82.5	-0.7019		82.5	-0.57983
82.5938	-0.54932		82.625	-0.64087
82.6875	-0.64087		82.6875	-0.57983
82.7812	-0.61035		82.8125	-0.67139
82.9062	-0.57983		82.875	-0.61035
83	-0.57983		83	-0.64087
83.0938	-0.54932		83.125	-0.57983
83.1875	-0.48828		83.1875	-0.61035
83.2812	-0.64087		83.3125	-0.61035
83.4062	-0.48828		83.375	-0.54932
83.5	-0.7019		83.5	-0.64087
83.5938	-0.61035		83.625	-0.57983
83.6875	-0.61035		83.6875	-0.57983
83.7812	-0.5188		83.8125	-0.61035
83.9062	-0.64087		83.875	-0.67139
84	-0.54932		84	-0.48828
84.0938	-0.54932		84.125	-0.5188
84.1875	-0.64087		84.1875	-0.54932
84.2812	-0.57983		84.3125	-0.42725
84.4062	-0.57983		84.375	-0.57983
84.5	-0.61035		84.5	-0.45776
84.5938	-0.57983		84.625	-0.57983
84.6875	-0.64087		84.6875	-0.54932
84.7812	-0.61035		84.8125	-0.54932
84.9062	-0.54932		84.875	-0.48828
85	-0.57983		85	-0.5188
85.0938	-0.42725		85.125	-0.48828
85.1875	-0.57983		85.1875	-0.48828
85.2812	-0.57983		85.3125	-0.54932
85.4062	-0.5188		85.375	-0.42725
85.5	-0.54932		85.5	-0.57983
85.5938	-0.57983		85.625	-0.5188
85.6875	-0.45776		85.6875	-0.5188
85.7812	-0.48828		85.8125	-0.57983
85.9062	-0.5188		85.875	-0.61035
86	-0.45776		86	-0.45776
86.0938	-0.5188		86.125	-0.61035
86.1875	-0.5188		86.1875	-0.54932
86.2812	-0.48828		86.3125	-0.54932
86.4062	-0.64087		86.375	-0.54932
86.5	-0.61035		86.5	-0.5188
86.5938	-0.5188		86.625	-0.54932
86.6875	-0.54932		86.6875	-0.61035
86.7812	-0.57983		86.8125	-0.57983
86.9062	-0.61035		86.875	-0.5188
87	-0.54932		87	-0.64087
87.0938	-0.48828		87.125	-0.42725
87.1875	-0.48828		87.1875	-0.64087
87.2812	-0.64087		87.3125	-0.57983
87.4062	-0.57983		87.375	-0.57983
87.5	-0.5188		87.5	-0.64087
87.5938	-0.57983		87.625	-0.64087
87.6875	-0.5188		87.6875	-0.61035
87.7812	-0.67139		87.8125	-0.61035
87.9062	-0.54932		87.875	-0.7019
88	-0.54932		88	-0.42725
88.0938	-0.67139		88.125	-0.64087
88.1875	-0.73242		88.1875	-0.5188
88.2812	-0.57983		88.3125	-0.54932
88.4062	-0.64087		88.375	-0.54932
88.5	-0.67139		88.5	-0.67139
88.5938	-0.54932		88.625	-0.67139
88.6875	-0.7019		88.6875	-0.64087
88.7812	-0.64087		88.8125	-0.57983
88.9062	-0.57983		88.875	-0.61035
89	-0.64087		89	-0.54932
89.0938	-0.7019		89.125	-0.61035
89.1875	-0.54932		89.1875	-0.57983
89.2812	-0.61035		89.3125	-0.67139
89.4062	-0.61035		89.375	-0.5188
89.5	-0.67139		89.5	-0.67139
89.5938	-0.64087		89.625	-0.7019
89.6875	-0.5188		89.6875	-0.54932
89.7812	-0.61035		89.8125	-0.61035
89.9062	-0.54932		89.875	-0.64087
90	-0.61035		90	-0.5188
90.0938	-0.7019		90.125	-0.64087
90.1875	-0.76294		90.1875	-0.64087
90.2812	-0.61035		90.3125	-0.61035
90.4062	-0.61035		90.375	-0.64087
90.5	-0.67139		90.5	-0.57983
90.5938	-0.45776		90.625	-0.57983
90.6875	-0.61035		90.6875	-0.5188
90.7812	-0.64087		90.8125	-0.5188
90.9062	-0.57983		90.875	-0.64087
91	-0.54932		91	-0.57983
91.0938	-0.61035		91.125	-0.5188
91.1875	-0.64087		91.1875	-0.54932
91.2812	-0.61035		91.3125	-0.57983
91.4062	-0.61035		91.375	-0.5188
91.5	-0.54932		91.5	-0.5188
91.5938	-0.57983		91.625	-0.54932
91.6875	-0.45776		91.6875	-0.45776
91.7812	-0.57983		91.8125	-0.5188
91.9062	-0.61035		91.875	-0.42725
92	-0.5188		92	-0.5188
92.0938	-0.64087		92.125	-0.57983
92.1875	-0.64087		92.1875	-0.61035
92.2812	-0.5188		92.3125	-0.48828
92.4062	-0.48828		92.375	-0.54932
92.5	-0.61035		92.5	-0.61035
92.5938	-0.54932		92.625	-0.5188
92.6875	-0.57983		92.6875	-0.5188
92.7812	-0.67139		92.8125	-0.39673
92.9062	-0.57983		92.875	-0.5188
93	-0.57983		93	-0.48828
93.0938	-0.57983		93.125	-0.54932
93.1875	-0.5188		93.1875	-0.54932
93.2812	-0.57983		93.3125	-0.67139
93.4062	-0.57983		93.375	-0.57983
93.5	-0.5188		93.5	-0.57983
93.5938	-0.61035		93.625	-0.64087
93.6875	-0.5188		93.6875	-0.42725
93.7812	-0.57983		93.8125	-0.57983
93.9062	-0.61035		93.875	-0.54932
94	-0.57983		94	-0.67139
94.0938	-0.57983		94.125	-0.64087
94.1875	-0.61035		94.1875	-0.67139
94.2812	-0.61035		94.3125	-0.61035
94.4062	-0.54932		94.375	-0.57983
94.5	-0.57983		94.5	-0.57983
94.5938	-0.5188		94.625	-0.57983
94.6875	-0.61035		94.6875	-0.61035
94.7812	-0.64087		94.8125	-0.57983
94.9062	-0.64087		94.875	-0.73242
95	-0.67139		95	-0.64087
95.0938	-0.64087		95.125	-0.64087
95.1875	-0.61035		95.1875	-0.73242
95.2812	-0.57983		95.3125	-0.64087
95.4062	-0.67139		95.375	-0.61035
95.5	-0.61035		95.5	-0.61035
95.5938	-0.67139		95.625	-0.67139
95.6875	-0.61035		95.6875	-0.48828
95.7812	-0.64087		95.8125	-0.7019
95.9062	-0.64087		95.875	-0.67139
96	-0.57983		96	-0.73242
96.0938	-0.7019		96.125	-0.57983
96.1875	-0.57983		96.1875	-0.54932
96.2812	-0.64087		96.3125	-0.57983
96.4062	-0.64087		96.375	-0.5188
96.5	-0.67139		96.5	-0.61035
96.5938	-0.64087		96.625	-0.57983
96.6875	-0.73242		96.6875	-0.64087
96.7812	-0.76294		96.8125	-0.54932
96.9062	-0.64087		96.875	-0.73242
97	-0.64087		97	-0.61035
97.0938	-0.67139		97.125	-0.64087
97.1875	-0.54932		97.1875	-0.67139
97.2812	-0.73242		97.3125	-0.61035
97.4062	-0.57983		97.375	-0.48828
97.5	-0.64087		97.5	-0.48828
97.5938	-0.61035		97.625	-0.64087
97.6875	-0.61035		97.6875	-0.48828
97.7812	-0.61035		97.8125	-0.67139
97.9062	-0.57983		97.875	-0.61035
98	-0.54932		98	-0.61035
98.0938	-0.57983		98.125	-0.61035
98.1875	-0.67139		98.1875	-0.57983
98.2812	-0.42725		98.3125	-0.57983
98.4062	-0.64087		98.375	-0.57983
98.5	-0.54932		98.5	-0.54932
98.5938	-0.5188		98.625	-0.64087
98.6875	-0.61035		98.6875	-0.61035
98.7812	-0.61035		98.8125	-0.5188
98.9062	-0.5188		98.875	-0.61035
99	-0.5188		99	-0.64087
99.0938	-0.67139		99.125	-0.5188
99.1875	-0.39673		99.1875	-0.61035
99.2812	-0.54932		99.3125	-0.54932
99.4062	-0.54932		99.375	-0.45776
99.5	-0.61035		99.5	-0.48828
99.5938	-0.5188		99.625	-0.64087
99.6875	-0.48828		99.6875	-0.57983
99.7812	-0.54932		99.8125	-0.64087
99.9062	-0.54932		99.875	-0.67139
100	-0.45776		100	-0.57983
100.094	-0.57983		100.125	-0.57983
100.188	-0.5188		100.188	-0.5188
100.281	-0.5188		100.312	-0.54932
100.406	-0.5188		100.375	-0.5188
100.5	-0.7019		100.5	-0.61035
100.594	-0.45776		100.625	-0.64087
100.688	-0.57983		100.688	-0.7019
100.781	-0.61035		100.812	-0.61035
100.906	-0.54932		100.875	-0.64087
101	-0.57983		101	-0.67139
101.094	-0.64087		101.125	-0.5188
101.188	-0.5188		101.188	-0.64087
101.281	-0.54932		101.312	-0.61035
101.406	-0.57983		101.375	-0.57983
101.5	-0.61035		101.5	-0.64087
101.594	-0.64087		101.625	-0.67139
101.688	-0.57983		101.688	-0.61035
101.781	-0.64087		101.812	-0.67139
101.906	-0.57983		101.875	-0.64087
102	-0.48828		102	-0.61035
102.094	-0.57983		102.125	-0.61035
102.188	-0.67139		102.188	-0.54932
102.281	-0.54932		102.312	-0.67139
102.406	-0.54932		102.375	-0.64087
102.5	-0.54932		102.5	-0.61035
102.594	-0.5188		102.625	-0.67139
102.688	-0.54932		102.688	-0.67139
102.781	-0.64087		102.812	-0.54932
102.906	-0.5188		102.875	-0.7019
103	-0.61035		103	-0.57983
103.094	-0.67139		103.125	-0.54932
103.188	-0.64087		103.188	-0.54932
103.281	-0.57983		103.312	-0.67139
103.406	-0.64087		103.375	-0.5188
103.5	-0.5188		103.5	-0.64087
103.594	-0.61035		103.625	-0.64087
103.688	-0.61035		103.688	-0.48828
103.781	-0.5188		103.812	-0.57983
103.906	-0.61035		103.875	-0.42725
104	-0.54932		104	-0.57983
104.094	-0.64087		104.125	-0.48828
104.188	-0.64087		104.188	-0.5188
104.281	-0.57983		104.312	-0.54932
104.406	-0.64087		104.375	-0.54932
104.5	-0.54932		104.5	-0.48828
104.594	-0.54932		104.625	-0.57983
104.688	-0.57983		104.688	-0.67139
104.781	-0.57983		104.812	-0.39673
104.906	-0.45776		104.875	-0.61035
105	-0.57983		105	-0.48828
105.094	-0.57983		105.125	-0.54932
105.188	-0.57983		105.188	-0.48828
105.281	-0.61035		105.312	-0.61035
105.406	-0.57983		105.375	-0.5188
105.5	-0.5188		105.5	-0.54932
105.594	-0.54932		105.625	-0.5188
105.688	-0.57983		105.688	-0.5188
105.781	-0.45776		105.812	-0.48828
105.906	-0.57983		105.875	-0.48828
106	-0.5188		106	-0.5188
106.094	-0.5188		106.125	-0.64087
106.188	-0.45776		106.188	-0.5188
106.281	-0.48828		106.312	-0.67139
106.406	-0.57983		106.375	-0.57983
106.5	-0.45776		106.5	-0.48828
106.594	-0.45776		106.625	-0.57983
106.688	-0.48828		106.688	-0.61035
106.781	-0.5188		106.812	-0.42725
106.906	-0.48828		106.875	-0.61035
107	-0.61035		107	-0.61035
107.094	-0.54932		107.125	-0.5188
107.188	-0.45776		107.188	-0.57983
107.281	-0.54932		107.312	-0.61035
107.406	-0.57983		107.375	-0.64087
107.5	-0.54932		107.5	-0.61035
107.594	-0.5188		107.625	-0.61035
107.688	-0.61035		107.688	-0.61035
107.781	-0.61035		107.812	-0.57983
107.906	-0.67139		107.875	-0.54932
108	-0.61035		108	-0.54932
108.094	-0.64087		108.125	-0.57983
108.188	-0.64087		108.188	-0.5188
108.281	-0.57983		108.312	-0.57983
108.406	-0.67139		108.375	-0.54932
108.5	-0.57983		108.5	-0.48828
108.594	-0.5188		108.625	-0.61035
108.688	-0.61035		108.688	-0.61035
108.781	-0.73242		108.812	-0.48828
108.906	-0.61035		108.875	-0.64087
109	-0.73242		109	-0.73242
109.094	-0.7019		109.125	-0.5188
109.188	-0.61035		109.188	-0.64087
109.281	-0.7019		109.312	-0.64087
109.406	-0.67139		109.375	-0.57983
109.5	-0.54932		109.5	-0.64087
109.594	-0.67139		109.625	-0.48828
109.688	-0.67139		109.688	-0.57983
109.781	-0.61035		109.812	-0.48828
109.906	-0.67139		109.875	-0.57983
110	-0.61035		110	-0.61035
110.094	-0.67139		110.125	-0.64087
110.188	-0.73242		110.188	-0.54932
110.281	-0.5188		110.312	-0.64087
110.406	-0.61035		110.375	-0.67139
110.5	-0.57983		110.5	-0.42725
110.594	-0.57983		110.625	-0.54932
110.688	-0.64087		110.688	-0.54932
110.781	-0.67139		110.812	-0.5188
110.906	-0.57983		110.875	-0.5188
111	-0.54932		111	-0.67139
111.094	-0.64087		111.125	-0.48828
111.188	-0.57983		111.188	-0.57983
111.281	-0.61035		111.312	-0.57983
111.406	-0.57983		111.375	-0.42725
111.5	-0.54932		111.5	-0.48828
111.594	-0.57983		111.625	-0.42725
111.688	-0.61035		111.688	-0.54932
111.781	-0.54932		111.812	-0.48828
111.906	-0.64087		111.875	-0.54932
112	-0.61035		112	-0.54932
112.094	-0.54932		112.125	-0.54932
112.188	-0.61035		112.188	-0.5188
112.281	-0.42725		112.312	-0.5188
112.406	-0.54932		112.375	-0.54932
112.5	-0.61035		112.5	-0.39673
112.594	-0.64087		112.625	-0.54932
112.688	-0.64087		112.688	-0.54932
112.781	-0.57983		112.812	-0.54932
112.906	-0.54932		112.875	-0.54932
113	-0.54932		113	-0.57983
113.094	-0.61035		113.125	-0.57983
113.188	-0.48828		113.188	-0.54932
113.281	-0.61035		113.312	-0.5188
113.406	-0.64087		113.375	-0.5188
113.5	-0.5188		113.5	-0.61035
113.594	-0.7019		113.625	-0.57983
113.688	-0.61035		113.688	-0.73242
113.781	-0.54932		113.812	-0.57983
113.906	-0.64087		113.875	-0.64087
114	-0.54932		114	-0.7019
114.094	-0.57983		114.125	-0.67139
114.188	-0.54932		114.188	-0.61035
114.281	-0.64087		114.312	-0.61035
114.406	-0.54932		114.375	-0.67139
114.5	-0.61035		114.5	-0.5188
114.594	-0.57983		114.625	-0.73242
114.688	-0.64087		114.688	-0.7019
114.781	-0.67139		114.812	-0.57983
114.906	-0.54932		114.875	-0.7019
115	-0.7019		115	-0.67139
115.094	-0.48828		115.125	-0.61035
115.188	-0.57983		115.188	-0.61035
115.281	-0.57983		115.312	-0.57983
115.406	-0.73242		115.375	-0.64087
115.5	-0.57983		115.5	-0.7019
115.594	-0.7019		115.625	-0.57983
115.688	-0.73242		115.688	-0.7019
115.781	-0.61035		115.812	-0.64087
115.906	-0.7019		115.875	-0.57983
116	-0.61035		116	-0.64087
116.094	-0.73242		116.125	-0.64087
116.188	-0.57983		116.188	-0.5188
116.281	-0.7019		116.312	-0.48828
116.406	-0.76294		116.375	-0.67139
116.5	-0.54932		116.5	-0.5188
116.594	-0.61035		116.625	-0.7019
116.688	-0.67139		116.688	-0.64087
116.781	-0.64087		116.812	-0.61035
116.906	-0.61035		116.875	-0.57983
117	-0.64087		117	-0.54932
117.094	-0.73242		117.125	-0.48828
117.188	-0.57983		117.188	-0.45776
117.281	-0.7019		117.312	-0.64087
117.406	-0.67139		117.375	-0.54932
117.5	-0.64087		117.5	-0.64087
117.594	-0.54932		117.625	-0.48828
117.688	-0.7019		117.688	-0.61035
117.781	-0.54932		117.812	-0.57983
117.906	-0.57983		117.875	-0.5188
118	-0.5188		118	-0.64087
118.094	-0.54932		118.125	-0.54932
118.188	-0.54932		118.188	-0.5188
118.281	-0.54932		118.312	-0.54932
118.406	-0.57983		118.375	-0.73242
118.5	-0.61035		118.5	-0.54932
118.594	-0.54932		118.625	-0.64087
118.688	-0.61035		118.688	-0.61035
118.781	-0.57983		118.812	-0.45776
118.906	-0.54932		118.875	-0.5188
119	-0.57983		119	-0.48828
119.094	-0.61035		119.125	-0.5188
119.188	-0.48828		119.188	-0.54932
119.281	-0.57983		119.312	-0.54932
119.406	-0.54932		119.375	-0.57983
119.5	-0.45776		119.5	-0.57983
119.594	-0.5188		119.625	-0.57983
119.688	-0.45776		119.688	-0.67139
119.781	-0.42725		119.812	-0.54932
119.906	-0.5188		119.875	-0.54932
120	-0.54932		120	-0.57983
120.094	-0.48828		120.125	-0.7019
120.188	-0.61035		120.188	-0.5188
120.281	-0.54932		120.312	-0.64087
120.406	-0.54932		120.375	-0.67139
120.5	-0.64087		120.5	-0.57983
120.594	-0.48828		120.625	-0.67139
120.688	-0.57983		120.688	-0.61035
120.781	-0.5188		120.812	-0.67139
120.906	-0.54932		120.875	-0.5188
121	-0.54932		121	-0.67139
121.094	-0.61035		121.125	-0.57983
121.188	-0.5188		121.188	-0.61035
121.281	-0.54932		121.312	-0.64087
121.406	-0.61035		121.375	-0.67139
121.5	-0.48828		121.5	-0.64087
121.594	-0.7019		121.625	-0.61035
121.688	-0.54932		121.688	-0.7019
121.781	-0.48828		121.812	-0.5188
121.906	-0.54932		121.875	-0.61035
122	-0.61035		122	-0.57983
122.094	-0.57983		122.125	-0.61035
122.188	-0.67139		122.188	-0.67139
122.281	-0.61035		122.312	-0.61035
122.406	-0.54932		122.375	-0.76294
122.5	-0.61035		122.5	-0.67139
122.594	-0.45776		122.625	-0.61035
122.688	-0.57983		122.688	-0.61035
122.781	-0.54932		122.812	-0.54932
122.906	-0.64087		122.875	-0.54932
123	-0.64087		123	-0.54932
123.094	-0.61035		123.125	-0.67139
123.188	-0.57983		123.188	-0.5188
123.281	-0.61035		123.312	-0.64087
123.406	-0.7019		123.375	-0.64087
123.5	-0.48828		123.5	-0.61035
123.594	-0.57983		123.625	-0.45776
123.688	-0.61035		123.688	-0.57983
123.781	-0.64087		123.812	-0.54932
123.906	-0.61035		123.875	-0.45776
124	-0.73242		124	-0.57983
124.094	-0.57983		124.125	-0.57983
124.188	-0.57983		124.188	-0.42725
124.281	-0.64087		124.312	-0.5188
124.406	-0.5188		124.375	-0.54932
124.5	-0.54932		124.5	-0.5188
124.594	-0.48828		124.625	-0.5188
124.688	-0.57983		124.688	-0.45776
124.781	-0.54932		124.812	-0.54932
124.906	-0.54932		124.875	-0.57983
125	-0.67139		125	-0.5188
125.094	-0.57983		125.125	-0.54932
125.188	-0.54932		125.188	-0.48828
125.281	-0.48828		125.312	-0.45776
125.406	-0.57983		125.375	-0.5188
125.5	-0.48828		125.5	-0.48828
125.594	-0.57983		125.625	-0.42725
125.688	-0.57983		125.688	-0.54932
125.781	-0.5188		125.812	-0.64087
125.906	-0.5188		125.875	-0.42725
126	-0.57983		126	-0.61035
126.094	-0.48828		126.125	-0.61035
126.188	-0.48828		126.188	-0.48828
126.281	-0.5188		126.312	-0.64087
126.406	-0.57983		126.375	-0.54932
126.5	-0.45776		126.5	-0.48828
126.594	-0.5188		126.625	-0.42725
126.688	-0.57983		126.688	-0.5188
126.781	-0.54932		126.812	-0.54932
126.906	-0.5188		126.875	-0.67139
127	-0.57983		127	-0.5188
127.094	-0.61035		127.125	-0.61035
127.188	-0.5188		127.188	-0.64087
127.281	-0.48828		127.312	-0.48828
127.406	-0.57983		127.375	-0.57983
127.5	-0.54932		127.5	-0.48828
127.594	-0.57983		127.625	-0.54932
127.688	-0.67139		127.688	-0.54932
127.781	-0.61035		127.812	-0.73242
127.906	-0.57983		127.875	-0.5188
128	-0.61035		128	-0.61035
128.094	-0.57983		128.125	-0.64087
128.188	-0.57983		128.188	-0.54932
128.281	-0.61035		128.312	-0.61035
128.406	-0.57983		128.375	-0.5188
128.5	-0.67139		128.5	-0.57983
128.594	-0.61035		128.625	-0.54932
128.688	-0.7019		128.688	-0.64087
128.781	-0.73242		128.812	-0.57983
128.906	-0.61035		128.875	-0.67139
129	-0.67139		129	-0.54932
129.094	-0.61035		129.125	-0.61035
129.188	-0.61035		129.188	-0.64087
129.281	-0.7019		129.312	-0.5188
129.406	-0.7019		129.375	-0.61035
129.5	-0.64087		129.5	-0.57983
129.594	-0.7019		129.625	-0.61035
129.688	-0.67139		129.688	-0.57983
129.781	-0.61035		129.812	-0.7019
129.906	-0.73242		129.875	-0.5188
130	-0.61035		130	-0.61035
130.094	-0.57983		130.125	-0.67139
130.188	-0.76294		130.188	-0.48828
130.281	-0.61035		130.312	-0.5188
130.406	-0.61035		130.375	-0.5188
130.5	-0.64087		130.5	-0.61035
130.594	-0.64087		130.625	-0.54932
130.688	-0.61035		130.688	-0.61035
130.781	-0.61035		130.812	-0.5188
130.906	-0.67139		130.875	-0.54932
131	-0.54932		131	-0.5188
131.094	-0.7019		131.125	-0.48828
131.188	-0.5188		131.188	-0.5188
131.281	-0.7019		131.312	-0.39673
131.406	-0.54932		131.375	-0.5188
131.5	-0.57983		131.5	-0.57983
131.594	-0.67139		131.625	-0.5188
131.688	-0.61035		131.688	-0.5188
131.781	-0.64087		131.812	-0.54932
131.906	-0.54932		131.875	-0.42725
132	-0.64087		132	-0.48828
132.094	-0.42725		132.125	-0.48828
132.188	-0.67139		132.188	-0.48828
132.281	-0.64087		132.312	-0.54932
132.406	-0.57983		132.375	-0.45776
132.5	-0.61035		132.5	-0.61035
132.594	-0.61035		132.625	-0.48828
132.688	-0.61035		132.688	-0.54932
132.781	-0.57983		132.812	-0.54932
132.906	-0.64087		132.875	-0.5188
133	-0.57983		133	-0.45776
133.094	-0.5188		133.125	-0.48828
133.188	-0.61035		133.188	-0.5188
133.281	-0.57983		133.312	-0.45776
133.406	-0.7019		133.375	-0.61035
133.5	-0.45776		133.5	-0.64087
133.594	-0.7019		133.625	-0.64087
133.688	-0.64087		133.688	-0.64087
133.781	-0.48828		133.812	-0.7019
133.906	-0.61035		133.875	-0.61035
134	-0.61035		134	-0.5188
134.094	-0.54932		134.125	-0.67139
134.188	-0.57983		134.188	-0.57983
134.281	-0.73242		134.312	-0.7019
134.406	-0.61035		134.375	-0.61035
134.5	-0.61035		134.5	-0.76294
134.594	-0.67139		134.625	-0.64087
134.688	-0.64087		134.688	-0.64087
134.781	-0.54932		134.812	-0.67139
134.906	-0.57983		134.875	-0.61035
135	-0.54932		135	-0.61035
135.094	-0.64087		135.125	-0.57983
135.188	-0.61035		135.188	-0.64087
135.281	-0.7019		135.312	-0.5188
135.406	-0.67139		135.375	-0.67139
135.5	-0.54932		135.5	-0.67139
135.594	-0.61035		135.625	-0.61035
135.688	-0.73242		135.688	-0.61035
135.781	-0.61035		135.812	-0.61035
135.906	-0.57983		135.875	-0.48828
136	-0.73242		136	-0.67139
136.094	-0.7019		136.125	-0.67139
136.188	-0.7019		136.188	-0.61035
136.281	-0.73242		136.312	-0.57983
136.406	-0.67139		136.375	-0.54932
136.5	-0.7019		136.5	-0.57983
136.594	-0.64087		136.625	-0.61035
136.688	-0.61035		136.688	-0.64087
136.781	-0.64087		136.812	-0.5188
136.906	-0.54932		136.875	-0.64087
137	-0.61035		137	-0.45776
137.094	-0.7019		137.125	-0.57983
137.188	-0.61035		137.188	-0.61035
137.281	-0.61035		137.312	-0.54932
137.406	-0.57983		137.375	-0.64087
137.5	-0.64087		137.5	-0.67139
137.594	-0.5188		137.625	-0.57983
137.688	-0.61035		137.688	-0.45776
137.781	-0.45776		137.812	-0.67139
137.906	-0.57983		137.875	-0.48828
138	-0.64087		138	-0.64087
138.094	-0.57983		138.125	-0.57983
138.188	-0.54932		138.188	-0.61035
138.281	-0.57983		138.312	-0.54932
138.406	-0.61035		138.375	-0.5188
138.5	-0.54932		138.5	-0.61035
138.594	-0.57983		138.625	-0.48828
138.688	-0.42725		138.688	-0.57983
138.781	-0.57983		138.812	-0.54932
138.906	-0.5188		138.875	-0.5188
139	-0.61035		139	-0.54932
139.094	-0.54932		139.125	-0.48828
139.188	-0.54932		139.188	-0.67139
139.281	-0.54932		139.312	-0.48828
139.406	-0.5188		139.375	-0.57983
139.5	-0.5188		139.5	-0.67139
139.594	-0.5188		139.625	-0.5188
139.688	-0.54932		139.688	-0.54932
139.781	-0.48828		139.812	-0.61035
139.906	-0.64087		139.875	-0.57983
140	-0.64087		140	-0.57983
140.094	-0.5188		140.125	-0.61035
140.188	-0.54932		140.188	-0.64087
140.281	-0.5188		140.312	-0.57983
140.406	-0.5188		140.375	-0.48828
140.5	-0.5188		140.5	-0.61035
140.594	-0.57983		140.625	-0.54932
140.688	-0.5188		140.688	-0.61035
140.781	-0.64087		140.812	-0.67139
140.906	-0.57983		140.875	-0.67139
141	-0.57983		141	-0.57983
141.094	-0.61035		141.125	-0.64087
141.188	-0.5188		141.188	-0.61035
141.281	-0.61035		141.312	-0.57983
141.406	-0.5188		141.375	-0.64087
141.5	-0.54932		141.5	-0.64087
141.594	-0.57983		141.625	-0.61035
141.688	-0.61035		141.688	-0.64087
141.781	-0.54932		141.812	-0.7019
141.906	-0.67139		141.875	-0.7019
142	-0.67139		142	-0.64087
142.094	-0.5188		142.125	-0.7019
142.188	-0.64087		142.188	-0.64087
142.281	-0.57983		142.312	-0.64087
142.406	-0.45776		142.375	-0.5188
142.5	-0.61035		142.5	-0.64087
142.594	-0.64087		142.625	-0.64087
142.688	-0.54932		142.688	-0.54932
142.781	-0.57983		142.812	-0.7019
142.906	-0.61035		142.875	-0.7019
143	-0.57983		143	-0.57983
143.094	-0.64087		143.125	-0.64087
143.188	-0.57983		143.188	-0.61035
143.281	-0.61035		143.312	-0.5188
143.406	-0.61035		143.375	-0.48828
143.5	-0.57983		143.5	-0.64087
143.594	-0.67139		143.625	-0.45776
143.688	-0.67139		143.688	-0.5188
143.781	-0.54932		143.812	-0.5188
143.906	-0.61035		143.875	-0.54932
144	-0.7019		144	-0.54932
144.094	-0.45776		144.125	-0.5188
144.188	-0.67139		144.188	-0.54932
144.281	-0.57983		144.312	-0.45776
144.406	-0.54932		144.375	-0.48828
144.5	-0.61035		144.5	-0.45776
144.594	-0.7019		144.625	-0.57983
144.688	-0.64087		144.688	-0.48828
144.781	-0.57983		144.812	-0.61035
144.906	-0.61035		144.875	-0.5188
145	-0.5188		145	-0.42725
145.094	-0.64087		145.125	-0.48828
145.188	-0.45776		145.188	-0.45776
145.281	-0.54932		145.312	-0.45776
145.406	-0.57983		145.375	-0.42725
145.5	-0.57983		145.5	-0.61035
145.594	-0.61035		145.625	-0.48828
145.688	-0.54932		145.688	-0.61035
145.781	-0.5188		145.812	-0.54932
145.906	-0.48828		145.875	-0.57983
146	-0.61035		146	-0.61035
146.094	-0.45776		146.125	-0.45776
146.188	-0.54932		146.188	-0.54932
146.281	-0.54932		146.312	-0.48828
146.406	-0.57983		146.375	-0.5188
146.5	-0.57983		146.5	-0.5188
146.594	-0.57983		146.625	-0.61035
146.688	-0.57983		146.688	-0.45776
146.781	-0.61035		146.812	-0.54932
146.906	-0.5188		146.875	-0.64087
147	-0.54932		147	-0.48828
147.094	-0.5188		147.125	-0.54932
147.188	-0.5188		147.188	-0.54932
147.281	-0.5188		147.312	-0.48828
147.406	-0.61035		147.375	-0.48828
147.5	-0.5188		147.5	-0.67139
147.594	-0.54932		147.625	-0.61035
147.688	-0.64087		147.688	-0.64087
147.781	-0.54932		147.812	-0.61035
147.906	-0.67139		147.875	-0.54932
148	-0.5188		148	-0.57983
148.094	-0.64087		148.125	-0.5188
148.188	-0.57983		148.188	-0.54932
148.281	-0.7019		148.312	-0.61035
148.406	-0.57983		148.375	-0.54932
148.5	-0.7019		148.5	-0.57983
148.594	-0.73242		148.625	-0.61035
148.688	-0.57983		148.688	-0.5188
148.781	-0.76294		148.812	-0.57983
148.906	-0.57983		148.875	-0.67139
149	-0.67139		149	-0.54932
149.094	-0.57983		149.125	-0.61035
149.188	-0.67139		149.188	-0.57983
149.281	-0.61035		149.312	-0.61035
149.406	-0.67139		149.375	-0.48828
149.5	-0.64087		149.5	-0.7019
149.594	-0.61035		149.625	-0.57983
149.688	-0.64087		149.688	-0.57983
149.781	-0.67139		149.812	-0.57983
149.906	-0.57983		149.875	-0.54932
150	-0.64087		150	-0.54932
150.094	-0.54932		150.125	-0.45776
150.188	-0.76294		150.188	-0.57983
150.281	-0.61035		150.312	-0.5188
150.406	-0.57983		150.375	-0.57983
150.5	-0.57983		150.5	-0.61035
150.594	-0.67139		150.625	-0.61035
150.688	-0.61035		150.688	-0.48828
150.781	-0.61035		150.812	-0.45776
150.906	-0.7019		150.875	-0.5188
151	-0.57983		151	-0.39673
151.094	-0.67139		151.125	-0.5188
151.188	-0.61035		151.188	-0.5188
151.281	-0.64087		151.312	-0.54932
151.406	-0.64087		151.375	-0.45776
151.5	-0.61035		151.5	-0.54932
151.594	-0.61035		151.625	-0.48828
151.688	-0.61035		151.688	-0.48828
151.781	-0.42725		151.812	-0.45776
151.906	-0.61035		151.875	-0.42725
152	-0.61035		152	-0.48828
152.094	-0.5188		152.125	-0.39673
152.188	-0.64087		152.188	-0.54932
152.281	-0.61035		152.312	-0.5188
152.406	-0.5188		152.375	-0.45776
152.5	-0.64087		152.5	-0.45776
152.594	-0.7019		152.625	-0.57983
152.688	-0.54932		152.688	-0.45776
152.781	-0.61035		152.812	-0.57983
152.906	-0.61035		152.875	-0.54932
153	-0.54932		153	-0.57983
153.094	-0.54932		153.125	-0.54932
153.188	-0.61035		153.188	-0.61035
153.281	-0.61035		153.312	-0.57983
153.406	-0.64087		153.375	-0.57983
153.5	-0.57983		153.5	-0.64087
153.594	-0.57983		153.625	-0.54932
153.688	-0.54932		153.688	-0.73242
153.781	-0.48828		153.812	-0.45776
153.906	-0.61035		153.875	-0.67139
154	-0.67139		154	-0.67139
154.094	-0.57983		154.125	-0.57983
154.188	-0.64087		154.188	-0.64087
154.281	-0.67139		154.312	-0.67139
154.406	-0.5188		154.375	-0.64087
154.5	-0.61035		154.5	-0.57983
154.594	-0.54932		154.625	-0.73242
154.688	-0.57983		154.688	-0.5188
154.781	-0.64087		154.812	-0.64087
154.906	-0.73242		154.875	-0.57983
155	-0.64087		155	-0.64087
155.094	-0.67139		155.125	-0.67139
155.188	-0.61035		155.188	-0.7019
155.281	-0.54932		155.312	-0.64087
155.406	-0.67139		155.375	-0.67139
155.5	-0.54932		155.5	-0.61035
155.594	-0.54932		155.625	-0.61035
155.688	-0.61035		155.688	-0.61035
155.781	-0.67139		155.812	-0.64087
155.906	-0.64087		155.875	-0.54932
156	-0.7019		156	-0.7019
156.094	-0.67139		156.125	-0.45776
156.188	-0.64087		156.188	-0.61035
156.281	-0.7019		156.312	-0.64087
156.406	-0.54932		156.375	-0.54932
156.5	-0.64087		156.5	-0.61035
156.594	-0.64087		156.625	-0.67139
156.688	-0.64087		156.688	-0.57983
156.781	-0.67139		156.812	-0.67139
156.906	-0.73242		156.875	-0.67139
157	-0.64087		157	-0.64087
157.094	-0.64087		157.125	-0.57983
157.188	-0.67139		157.188	-0.61035
157.281	-0.48828		157.312	-0.61035
157.406	-0.61035		157.375	-0.54932
157.5	-0.61035		157.5	-0.61035
157.594	-0.61035		157.625	-0.54932
157.688	-0.57983		157.688	-0.57983
157.781	-0.61035		157.812	-0.54932
157.906	-0.61035		157.875	-0.61035
158	-0.61035		158	-0.64087
158.094	-0.57983		158.125	-0.5188
158.188	-0.54932		158.188	-0.5188
158.281	-0.48828		158.312	-0.54932
158.406	-0.42725		158.375	-0.5188
158.5	-0.54932		158.5	-0.48828
158.594	-0.57983		158.625	-0.48828
158.688	-0.45776		158.688	-0.57983
158.781	-0.57983		158.812	-0.57983
158.906	-0.64087		158.875	-0.67139
159	-0.5188		159	-0.54932
159.094	-0.5188		159.125	-0.57983
159.188	-0.54932		159.188	-0.61035
159.281	-0.5188		159.312	-0.45776
159.406	-0.5188		159.375	-0.5188
159.5	-0.61035		159.5	-0.42725
159.594	-0.5188		159.625	-0.5188
159.688	-0.5188		159.688	-0.57983
159.781	-0.54932		159.812	-0.64087
159.906	-0.54932		159.875	-0.57983
160	-0.42725		160	-0.64087
160.094	-0.48828		160.125	-0.61035
160.188	-0.45776		160.188	-0.54932
160.281	-0.57983		160.312	-0.57983
160.406	-0.5188		160.375	-0.42725
160.5	-0.61035		160.5	-0.61035
160.594	-0.67139		160.625	-0.57983
160.688	-0.5188		160.688	-0.64087
160.781	-0.61035		160.812	-0.64087
160.906	-0.64087		160.875	-0.73242
161	-0.54932		161	-0.61035
161.094	-0.45776		161.125	-0.57983
161.188	-0.57983		161.188	-0.61035
161.281	-0.54932		161.312	-0.54932
161.406	-0.61035		161.375	-0.64087
161.5	-0.57983		161.5	-0.57983
161.594	-0.61035		161.625	-0.76294
161.688	-0.67139		161.688	-0.67139
161.781	-0.57983		161.812	-0.64087
161.906	-0.67139		161.875	-0.64087
162	-0.57983		162	-0.61035
162.094	-0.48828		162.125	-0.61035
162.188	-0.54932		162.188	-0.61035
162.281	-0.7019		162.312	-0.64087
162.406	-0.61035		162.375	-0.57983
162.5	-0.64087		162.5	-0.7019
162.594	-0.61035		162.625	-0.64087
162.688	-0.48828		162.688	-0.64087
162.781	-0.61035		162.812	-0.64087
162.906	-0.61035		162.875	-0.61035
163	-0.57983		163	-0.61035
163.094	-0.54932		163.125	-0.54932
163.188	-0.64087		163.188	-0.57983
163.281	-0.61035		163.312	-0.48828
163.406	-0.64087		163.375	-0.67139
163.5	-0.61035		163.5	-0.54932
163.594	-0.57983		163.625	-0.61035
163.688	-0.57983		163.688	-0.57983
163.781	-0.57983		163.812	-0.5188
163.906	-0.5188		163.875	-0.54932
164	-0.67139		164	-0.48828
164.094	-0.48828		164.125	-0.42725
164.188	-0.61035		164.188	-0.42725
164.281	-0.57983		164.312	-0.57983
164.406	-0.57983		164.375	-0.5188
164.5	-0.61035		164.5	-0.61035
164.594	-0.64087		164.625	-0.57983
164.688	-0.57983		164.688	-0.5188
164.781	-0.54932		164.812	-0.5188
164.906	-0.64087		164.875	-0.48828
165	-0.42725		165	-0.39673
165.094	-0.64087		165.125	-0.57983
165.188	-0.5188		165.188	-0.45776
165.281	-0.5188		165.312	-0.45776
165.406	-0.57983		165.375	-0.54932
165.5	-0.5188		165.5	-0.48828
165.594	-0.48828		165.625	-0.54932
165.688	-0.48828		165.688	-0.54932
165.781	-0.57983		165.812	-0.42725
165.906	-0.39673		165.875	-0.45776
166	-0.57983		166	-0.42725
166.094	-0.39673		166.125	-0.48828
166.188	-0.42725		166.188	-0.42725
166.281	-0.45776		166.312	-0.67139
166.406	-0.48828		166.375	-0.54932
166.5	-0.57983		166.5	-0.57983
166.594	-0.5188		166.625	-0.54932
166.688	-0.42725		166.688	-0.5188
166.781	-0.57983		166.812	-0.57983
166.906	-0.5188		166.875	-0.5188
167	-0.5188		167	-0.54932
167.094	-0.57983		167.125	-0.48828
167.188	-0.61035		167.188	-0.5188
167.281	-0.45776		167.312	-0.5188
167.406	-0.64087		167.375	-0.64087
167.5	-0.67139		167.5	-0.57983
167.594	-0.48828		167.625	-0.5188
167.688	-0.61035		167.688	-0.54932
167.781	-0.64087		167.812	-0.45776
167.906	-0.57983		167.875	-0.54932
168	-0.57983		168	-0.5188
168.094	-0.67139		168.125	-0.57983
168.188	-0.67139		168.188	-0.54932
168.281	-0.73242		168.312	-0.57983
168.406	-0.67139		168.375	-0.5188
168.5	-0.76294		168.5	-0.57983
168.594	-0.64087		168.625	-0.64087
168.688	-0.57983		168.688	-0.48828
168.781	-0.67139		168.812	-0.61035
168.906	-0.64087		168.875	-0.5188
169	-0.57983		169	-0.54932
169.094	-0.67139		169.125	-0.57983
169.188	-0.73242		169.188	-0.57983
169.281	-0.61035		169.312	-0.5188
169.406	-0.64087		169.375	-0.64087
169.5	-0.67139		169.5	-0.54932
169.594	-0.5188		169.625	-0.57983
169.688	-0.64087		169.688	-0.5188
169.781	-0.67139		169.812	-0.54932
169.906	-0.67139		169.875	-0.48828
170	-0.57983		170	-0.57983
170.094	-0.67139		170.125	-0.5188
170.188	-0.61035		170.188	-0.57983
170.281	-0.61035		170.312	-0.67139
170.406	-0.57983		170.375	-0.54932
170.5	-0.54932		170.5	-0.57983
170.594	-0.64087		170.625	-0.48828
170.688	-0.5188		170.688	-0.54932
170.781	-0.67139		170.812	-0.48828
170.906	-0.64087		170.875	-0.54932
171	-0.54932		171	-0.5188
171.094	-0.64087		171.125	-0.57983
171.188	-0.67139		171.188	-0.48828
171.281	-0.64087		171.312	-0.48828
171.406	-0.57983		171.375	-0.57983
171.5	-0.64087		171.5	-0.42725
171.594	-0.45776		171.625	-0.5188
171.688	-0.61035		171.688	-0.39673
171.781	-0.54932		171.812	-0.5188
171.906	-0.64087		171.875	-0.48828
172	-0.64087		172	-0.5188
172.094	-0.54932		172.125	-0.48828
172.188	-0.54932		172.188	-0.5188
172.281	-0.57983		172.312	-0.48828
172.406	-0.54932		172.375	-0.42725
172.5	-0.5188		172.5	-0.48828
172.594	-0.61035		172.625	-0.5188
172.688	-0.5188		172.688	-0.45776
172.781	-0.64087		172.812	-0.64087
172.906	-0.57983		172.875	-0.5188
173	-0.48828		173	-0.54932
173.094	-0.61035		173.125	-0.61035
173.188	-0.54932		173.188	-0.5188
173.281	-0.54932		173.312	-0.54932
173.406	-0.57983		173.375	-0.61035
173.5	-0.61035		173.5	-0.45776
173.594	-0.5188		173.625	-0.54932
173.688	-0.67139		173.688	-0.61035
173.781	-0.61035		173.812	-0.54932
173.906	-0.57983		173.875	-0.64087
174	-0.64087		174	-0.67139
174.094	-0.57983		174.125	-0.61035
174.188	-0.5188		174.188	-0.67139
174.281	-0.57983		174.312	-0.67139
174.406	-0.57983		174.375	-0.54932
174.5	-0.54932		174.5	-0.67139
174.594	-0.61035		174.625	-0.7019
174.688	-0.61035		174.688	-0.61035
174.781	-0.64087		174.812	-0.7019
174.906	-0.64087		174.875	-0.57983
175	-0.5188		175	-0.5188
175.094	-0.67139		175.125	-0.64087
175.188	-0.57983		175.188	-0.64087
175.281	-0.54932		175.312	-0.57983
175.406	-0.64087		175.375	-0.57983
175.5	-0.7019		175.5	-0.54932
175.594	-0.61035		175.625	-0.57983
175.688	-0.73242		175.688	-0.73242
175.781	-0.7019		175.812	-0.61035
175.906	-0.61035		175.875	-0.64087
176	-0.61035		176	-0.64087
176.094	-0.7019		176.125	-0.54932
176.188	-0.57983		176.188	-0.61035
176.281	-0.67139		176.312	-0.5188
176.406	-0.64087		176.375	-0.57983
176.5	-0.67139		176.5	-0.57983
176.594	-0.64087		176.625	-0.7019
176.688	-0.64087		176.688	-0.5188
176.781	-0.67139		176.812	-0.7019
176.906	-0.61035		176.875	-0.57983
177	-0.5188		177	-0.54932
177.094	-0.67139		177.125	-0.67139
177.188	-0.57983		177.188	-0.45776
177.281	-0.48828		177.312	-0.5188
177.406	-0.64087		177.375	-0.45776
177.5	-0.7019		177.5	-0.61035
177.594	-0.54932		177.625	-0.54932
177.688	-0.61035		177.688	-0.67139
177.781	-0.64087		177.812	-0.54932
177.906	-0.48828		177.875	-0.57983
178	-0.61035		178	-0.54932
178.094	-0.54932		178.125	-0.48828
178.188	-0.54932		178.188	-0.61035
178.281	-0.5188		178.312	-0.5188
178.406	-0.61035		178.375	-0.54932
178.5	-0.57983		178.5	-0.54932
178.594	-0.54932		178.625	-0.67139
178.688	-0.5188		178.688	-0.48828
178.781	-0.5188		178.812	-0.57983
178.906	-0.57983		178.875	-0.61035
179	-0.39673		179	-0.48828
179.094	-0.54932		179.125	-0.57983
179.188	-0.57983		179.188	-0.42725
179.281	-0.5188		179.312	-0.54932
179.406	-0.61035		179.375	-0.54932
179.5	-0.61035		179.5	-0.57983
179.594	-0.54932		179.625	-0.57983
179.688	-0.5188		179.688	-0.61035
179.781	-0.67139		179.812	-0.64087
179.906	-0.48828		179.875	-0.54932
180	-0.54932		180	-0.54932
180.094	-0.61035		180.125	-0.39673
180.188	-0.5188		180.188	-0.54932
180.281	-0.57983		180.312	-0.57983
180.406	-0.54932		180.375	-0.57983
180.5	-0.57983		180.5	-0.54932
180.594	-0.61035		180.625	-0.64087
180.688	-0.45776		180.688	-0.57983
180.781	-0.57983		180.812	-0.61035
180.906	-0.5188		180.875	-0.57983
181	-0.57983		181	-0.5188
181.094	-0.5188		181.125	-0.64087
181.188	-0.64087		181.188	-0.54932
181.281	-0.5188		181.312	-0.64087
181.406	-0.61035		181.375	-0.61035
181.5	-0.67139		181.5	-0.57983
181.594	-0.57983		181.625	-0.61035
181.688	-0.67139		181.688	-0.67139
181.781	-0.57983		181.812	-0.67139
181.906	-0.67139		181.875	-0.64087
182	-0.5188		182	-0.57983
182.094	-0.57983		182.125	-0.64087
182.188	-0.5188		182.188	-0.7019
182.281	-0.7019		182.312	-0.61035
182.406	-0.67139		182.375	-0.64087
182.5	-0.48828		182.5	-0.67139
182.594	-0.7019		182.625	-0.64087
182.688	-0.48828		182.688	-0.57983
182.781	-0.61035		182.812	-0.54932
182.906	-0.5188		182.875	-0.5188
183	-0.61035		183	-0.48828
183.094	-0.73242		183.125	-0.67139
183.188	-0.54932		183.188	-0.54932
183.281	-0.57983		183.312	-0.57983
183.406	-0.54932		183.375	-0.57983
183.5	-0.54932		183.5	-0.54932
183.594	-0.54932		183.625	-0.57983
183.688	-0.54932		183.688	-0.5188
183.781	-0.57983		183.812	-0.48828
183.906	-0.45776		183.875	-0.45776
184	-0.67139		184	-0.54932
184.094	-0.57983		184.125	-0.45776
184.188	-0.61035		184.188	-0.61035
184.281	-0.54932		184.312	-0.54932
184.406	-0.67139		184.375	-0.5188
184.5	-0.48828		184.5	-0.57983
184.594	-0.54932		184.625	-0.5188
184.688	-0.39673		184.688	-0.45776
184.781	-0.39673		184.812	-0.45776
184.906	-0.21362		184.875	-0.54932
185	-0.06104		185	-0.5188
185.094	-0.06104		185.125	-0.61035
185.188	0.12207		185.188	-0.39673
185.281	0.27466		185.312	-0.54932
185.406	0.33569		185.375	-0.54932
185.5	0.45776		185.5	-0.48828
185.594	0.73242		185.625	-0.48828
185.688	0.73242		185.688	-0.42725
185.781	0.7019		185.812	-0.39673
185.906	0.73242		185.875	-0.54932
186	0.45776		186	-0.5188
186.094	0.24414		186.125	-0.48828
186.188	0.18311		186.188	-0.57983
186.281	-0.09155		186.312	-0.61035
186.406	-0.24414		186.375	-0.5188
186.5	-0.33569		186.5	-0.54932
186.594	-0.45776		186.625	-0.61035
186.688	-0.61035		186.688	-0.45776
186.781	-0.64087		186.812	-0.61035
186.906	-0.7019		186.875	-0.48828
187	-0.64087		187	-0.48828
187.094	-0.76294		187.125	-0.5188
187.188	-0.85449		187.188	-0.48828
187.281	-0.67139		187.312	-0.61035
187.406	-0.79346		187.375	-0.45776
187.5	-0.73242		187.5	-0.57983
187.594	-0.73242		187.625	-0.45776
187.688	-0.82397		187.688	-0.54932
187.781	-0.94604		187.812	-0.45776
187.906	-0.85449		187.875	-0.61035
188	-0.85449		188	-0.64087
188.094	-0.91553		188.125	-0.5188
188.188	-0.85449		188.188	-0.57983
188.281	-0.88501		188.312	-0.54932
188.406	-0.82397		188.375	-0.54932
188.5	-0.88501		188.5	-0.48828
188.594	-0.94604		188.625	-0.67139
188.688	-0.88501		188.688	-0.5188
188.781	-0.85449		188.812	-0.54932
188.906	-0.88501		188.875	-0.64087
189	-0.76294		189	-0.54932
189.094	-0.76294		189.125	-0.61035
189.188	-0.85449		189.188	-0.54932
189.281	-0.64087		189.312	-0.57983
189.406	-0.67139		189.375	-0.54932
189.5	-0.73242		189.5	-0.54932
189.594	-0.76294		189.625	-0.57983
189.688	-0.7019		189.688	-0.5188
189.781	-0.76294		189.812	-0.61035
189.906	-0.64087		189.875	-0.48828
190	-0.64087		190	-0.64087
190.094	-0.73242		190.125	-0.48828
190.188	-0.57983		190.188	-0.64087
190.281	-0.67139		190.312	-0.5188
190.406	-0.54932		190.375	-0.48828
190.5	-0.57983		190.5	-0.5188
190.594	-0.67139		190.625	-0.54932
190.688	-0.67139		190.688	-0.54932
190.781	-0.61035		190.812	-0.54932
190.906	-0.64087		190.875	-0.5188
191	-0.61035		191	-0.5188
191.094	-0.5188		191.125	-0.42725
191.188	-0.57983		191.188	-0.39673
191.281	-0.57983		191.312	-0.42725
191.406	-0.64087		191.375	-0.42725
191.5	-0.61035		191.5	-0.42725
191.594	-0.54932		191.625	-0.54932
191.688	-0.64087		191.688	-0.42725
191.781	-0.61035		191.812	-0.30518
191.906	-0.61035		191.875	-0.24414
192	-0.57983		192	-0.12207
192.094	-0.67139		192.125	0.03052
192.188	-0.5188		192.188	0.12207
192.281	-0.61035		192.312	0.24414
192.406	-0.61035		192.375	0.45776
192.5	-0.54932		192.5	0.48828
192.594	-0.57983		192.625	0.67139
192.688	-0.64087		192.688	0.67139
192.781	-0.5188		192.812	0.64087
192.906	-0.61035		192.875	0.54932
193	-0.57983		193	0.33569
193.094	-0.61035		193.125	0.39673
193.188	-0.61035		193.188	0.15259
193.281	-0.57983		193.312	0.03052
193.406	-0.64087		193.375	-0.12207
193.5	-0.61035		193.5	-0.21362
193.594	-0.5188		193.625	-0.48828
193.688	-0.64087		193.688	-0.54932
193.781	-0.54932		193.812	-0.54932
193.906	-0.54932		193.875	-0.73242
194	-0.5188		194	-0.79346
194.094	-0.61035		194.125	-0.7019
194.188	-0.5188		194.188	-0.79346
194.281	-0.64087		194.312	-0.88501
194.406	-0.67139		194.375	-0.73242
194.5	-0.54932		194.5	-1.00708
194.594	-0.61035		194.625	-0.88501
194.688	-0.64087		194.688	-0.91553
194.781	-0.61035		194.812	-0.97656
194.906	-0.57983		194.875	-0.91553
195	-0.61035		195	-0.91553
195.094	-0.61035		195.125	-0.85449
195.188	-0.67139		195.188	-0.97656
195.281	-0.61035		195.312	-1.0376
195.406	-0.7019		195.375	-1.06812
195.5	-0.67139		195.5	-0.88501
195.594	-0.5188		195.625	-1.0376
195.688	-0.67139		195.688	-1.0376
195.781	-0.61035		195.812	-0.91553
195.906	-0.57983		195.875	-0.94604
196	-0.67139		196	-0.85449
196.094	-0.7019		196.125	-0.85449
196.188	-0.67139		196.188	-0.79346
196.281	-0.7019		196.312	-0.91553
196.406	-0.76294		196.375	-0.76294
196.5	-0.64087		196.5	-0.91553
196.594	-0.67139		196.625	-0.82397
196.688	-0.61035		196.688	-0.79346
196.781	-0.57983		196.812	-0.76294
196.906	-0.67139		196.875	-0.67139
197	-0.57983		197	-0.76294
197.094	-0.67139		197.125	-0.67139
197.188	-0.64087		197.188	-0.73242
197.281	-0.61035		197.312	-0.7019
197.406	-0.67139		197.375	-0.7019
197.5	-0.67139		197.5	-0.64087
197.594	-0.61035		197.625	-0.7019
197.688	-0.54932		197.688	-0.76294
197.781	-0.67139		197.812	-0.61035
197.906	-0.48828		197.875	-0.64087
198	-0.61035		198	-0.61035
198.094	-0.57983		198.125	-0.61035
198.188	-0.54932		198.188	-0.7019
198.281	-0.57983		198.312	-0.67139
198.406	-0.61035		198.375	-0.54932
198.5	-0.61035		198.5	-0.64087
198.594	-0.5188		198.625	-0.61035
198.688	-0.61035		198.688	-0.61035
198.781	-0.45776		198.812	-0.54932
198.906	-0.61035		198.875	-0.54932
199	-0.48828		199	-0.61035
199.094	-0.48828		199.125	-0.5188
199.188	-0.54932		199.188	-0.54932
199.281	-0.54932		199.312	-0.61035
199.406	-0.57983		199.375	-0.61035
199.5	-0.48828		199.5	-0.54932
199.594	-0.57983		199.625	-0.57983
199.688	-0.5188		199.688	-0.61035
[truncated: 100,408 more rows]

## Sheet: A iii
ACSF	CsCl	ACSF
2.27	1.32	2.01
1.96	2.01	1.52
1.17	1.63	0.91
2.26	2.08	3.25
2.55	2.61	3
