# Supplementary material for: The cation channel mechanisms of subthreshold inward depolarizing currents in the mice VTA dopaminergic neurons and their roles in the chronic-stress-induced depression-like behavior
Source: eLife. 2024 Dec 6;12:RP88319. doi: 10.7554/eLife.88319 (PMC11623934; doi:10.7554/eLife.88319)
Supplement: Figure 2—figure supplement 4—source data 2. [file elife-88319-fig2-figsupp4-data2.xlsx]

## Sheet: B i
Time (min)	Firing rate (Hz)
0.3	2.11111
0.6	2.05556
0.9	2.11111
1.2	2.11111
1.5	2.22222
1.8	2.22222
2.1	2.22222
2.4	2.11111
2.7	2.16667
3	2.11111
3.3	2.11111
3.6	2.27778
3.9	1.83333
4.2	1.77778
4.5	2.05556
4.8	2.16667
5.1	2.16667
5.4	2.05556
5.7	2.16667
6	2.16667
6.3	2.16667
6.6	2.05556
6.9	2.16667
7.2	2.11111
7.5	2.05556
7.8	2.22222
8.1	2.11111
8.4	2.22222
8.7	2.11111
9	2.05556
9.3	2.11111
9.6	2.11111
9.9	2.11111
10.2	2.16667
10.5	2.16667
10.8	2.22222
11.1	2.22222
11.4	2.22222
11.7	2.16667
12	2.22222
12.3	2.27778
12.6	2.27778
12.9	2.33333
13.2	2.33333
13.5	2.33333
13.8	2.27778
14.1	2.27778
14.4	2.27778
14.7	2.33333
15	2.27778
15.3	2.22222
15.6	2.33333
15.9	2.27778
16.2	2.22222
16.5	2.11111
16.8	2.16667
17.1	2.05556
17.4	2.16667
17.7	2.11111
18	2.16667
18.3	2.16667
18.6	2.16667
18.9	2.11111
19.2	2.11111
19.5	2.11111
19.8	2.05556
20.1	2.11111
20.4	2.16667
20.7	2.11111
21	2.11111
21.3	2.05556
21.6	2.05556
21.9	2
22.2	2.05556
22.5	2
22.8	2.05556
23.1	2.11111
23.4	2.05556
23.7	2.16667
24	2.11111
24.3	2
24.6	2.16667
24.9	2.05556
25.2	2.11111
25.5	2.11111
25.8	2.11111
26.1	2
26.4	2.16667
26.7	2.11111
27	2.11111
27.3	2.16667
27.6	2.05556
27.9	2.16667
28.2	2.16667
28.5	2.05556
28.8	2.11111
29.1	2.05556
29.4	2.05556
29.7	2
30	1.77778

## Sheet: B ii
ACSF			zd7288
Time (ms)	voltage (mv)		Time (ms)	voltage (mv)
0	-1.70898		0	-2.44141
0.10156	-1.52588		0.125	-2.50244
0.20313	-1.77002		0.1875	-2.68555
0.30469	-1.77002		0.3125	-2.80762
0.39844	-1.46484		0.375	-2.68555
0.5	-1.83105		0.5	-3.11279
0.60156	-1.64795		0.625	-3.35693
0.70313	-1.52588		0.6875	-2.99072
0.80469	-1.58691		0.8125	-3.479
0.89844	-1.83105		0.875	-3.41797
1	-1.09863		1	-3.17383
1.10156	-1.58691		1.125	-3.41797
1.20313	-1.64795		1.1875	-3.54004
1.30469	-1.34277		1.3125	-2.99072
1.39844	-1.58691		1.375	-3.23486
1.5	-1.0376		1.5	-3.479
1.60156	-0.91553		1.625	-3.41797
1.70313	-0.91553		1.6875	-3.84521
1.80469	-1.28174		1.8125	-3.479
1.89844	-1.64795		1.875	-3.66211
2	-2.2583		2	-3.54004
2.10156	-1.70898		2.125	-3.479
2.20313	-1.46484		2.1875	-3.60107
2.30469	-1.15967		2.3125	-3.60107
2.39844	-1.15967		2.375	-3.35693
2.5	-1.15967		2.5	-3.05176
2.60156	-1.40381		2.625	-3.11279
2.70313	-1.34277		2.6875	-2.68555
2.80469	-1.09863		2.8125	-2.56348
2.89844	-0.91553		2.875	-2.44141
3	-0.79346		3	-2.68555
3.10156	-0.54932		3.125	-2.31934
3.20313	-0.12207		3.1875	-1.95312
3.30469	-0.36621		3.3125	-2.0752
3.39844	-0.12207		3.375	-1.64795
3.5	0.12207		3.5	-1.46484
3.60156	-0.30518		3.625	-1.77002
3.70313	-0.30518		3.6875	-1.70898
3.80469	0.24414		3.8125	-1.09863
3.89844	0.18311		3.875	-1.64795
4	0		4	-1.46484
4.10156	0.24414		4.125	-1.0376
4.20313	0.18311		4.1875	-0.91553
4.30469	0.12207		4.3125	-0.24414
4.39844	-0.12207		4.375	-0.18311
4.5	-0.91553		4.5	-0.24414
4.60156	-0.48828		4.625	-0.36621
4.70313	-0.54932		4.6875	-0.67139
4.80469	-0.73242		4.8125	-0.91553
4.89844	-0.91553		4.875	-0.79346
5	-0.97656		5	-0.91553
5.10156	-1.0376		5.125	-0.73242
5.20313	-1.09863		5.1875	-0.30518
5.30469	-1.46484		5.3125	-0.54932
5.39844	-1.89209		5.375	-0.73242
5.5	-1.46484		5.5	-0.67139
5.60156	-2.01416		5.625	-0.91553
5.70313	-2.38037		5.6875	-0.73242
5.80469	-2.62451		5.8125	-0.54932
5.89844	-2.50244		5.875	-0.79346
6	-2.62451		6	-0.91553
6.10156	-2.62451		6.125	-1.09863
6.20313	-2.13623		6.1875	-0.91553
6.30469	-2.56348		6.3125	-0.54932
6.39844	-2.86865		6.375	-1.28174
6.5	-2.92969		6.5	-1.34277
6.60156	-2.68555		6.625	-1.52588
6.70313	-3.17383		6.6875	-1.58691
6.80469	-2.92969		6.8125	-1.28174
6.89844	-2.86865		6.875	-1.2207
7	-3.11279		7	-1.34277
7.10156	-2.74658		7.125	-1.34277
7.20313	-3.05176		7.1875	-1.58691
7.30469	-3.05176		7.3125	-1.95312
7.39844	-2.99072		7.375	-1.58691
7.5	-2.92969		7.5	-1.83105
7.60156	-2.62451		7.625	-1.58691
7.70313	-2.13623		7.6875	-1.34277
7.80469	-2.92969		7.8125	-1.64795
7.89844	-3.17383		7.875	-1.52588
8	-2.38037		8	-1.15967
8.10156	-2.74658		8.125	-1.34277
8.20313	-2.92969		8.1875	-1.58691
8.30469	-2.56348		8.3125	-1.09863
8.39844	-2.50244		8.375	-1.46484
8.5	-2.62451		8.5	-1.52588
8.60156	-2.19727		8.625	-1.52588
8.70313	-2.19727		8.6875	-1.46484
8.80469	-2.38037		8.8125	-1.28174
8.89844	-2.19727		8.875	-1.52588
9	-2.01416		9	-1.15967
9.10156	-1.70898		9.125	-1.0376
9.20313	-1.95312		9.1875	-1.09863
9.30469	-1.70898		9.3125	-1.70898
9.39844	-1.70898		9.375	-1.58691
9.5	-1.95312		9.5	-1.52588
9.60156	-2.13623		9.625	-1.34277
9.70313	-2.13623		9.6875	-1.34277
9.80469	-2.31934		9.8125	-1.28174
9.89844	-2.01416		9.875	-1.2207
10	-1.89209		10	-1.70898
10.1016	-2.31934		10.125	-1.58691
10.2031	-2.01416		10.1875	-1.28174
10.3047	-2.13623		10.3125	-1.2207
10.3984	-2.13623		10.375	-1.0376
10.5	-1.83105		10.5	-0.61035
10.6016	-1.95312		10.625	-0.73242
10.7031	-1.89209		10.6875	-0.85449
10.8047	-1.83105		10.8125	-0.48828
10.8984	-2.01416		10.875	-1.0376
11	-2.0752		11	-0.91553
11.1016	-1.77002		11.125	-0.48828
11.2031	-2.38037		11.1875	-0.42725
11.3047	-2.31934		11.3125	-0.12207
11.3984	-1.89209		11.375	-0.12207
11.5	-1.89209		11.5	-0.30518
11.6016	-1.77002		11.625	0.06104
11.7031	-2.13623		11.6875	-0.12207
11.8047	-2.0752		11.8125	-0.54932
11.8984	-1.89209		11.875	-0.12207
12	-2.01416		12	-0.36621
12.1016	-2.0752		12.125	-0.24414
12.2031	-1.89209		12.1875	-0.24414
12.3047	-1.89209		12.3125	-0.42725
12.3984	-1.95312		12.375	-0.67139
12.5	-1.77002		12.5	-0.36621
12.6016	-1.89209		12.625	-0.36621
12.7031	-2.0752		12.6875	-0.36621
12.8047	-2.74658		12.8125	-0.85449
12.8984	-2.74658		12.875	-1.2207
13	-2.86865		13	-1.09863
13.1016	-3.17383		13.125	-1.46484
13.2031	-3.479		13.1875	-2.0752
13.3047	-3.54004		13.3125	-2.19727
13.3984	-3.72314		13.375	-2.50244
13.5	-3.479		13.5	-2.68555
13.6016	-3.2959		13.625	-2.50244
13.7031	-4.08935		13.6875	-2.62451
13.8047	-3.90625		13.8125	-2.68555
13.8984	-3.78418		13.875	-2.56348
14	-3.96728		14	-2.86865
14.1016	-3.78418		14.125	-2.38037
14.2031	-3.2959		14.1875	-3.11279
14.3047	-3.35693		14.3125	-3.41797
14.3984	-3.11279		14.375	-3.17383
14.5	-3.05176		14.5	-3.23486
14.6016	-3.54004		14.625	-3.479
14.7031	-2.99072		14.6875	-3.66211
14.8047	-2.99072		14.8125	-3.23486
14.8984	-2.74658		14.875	-3.11279
15	-2.56348		15	-2.74658
15.1016	-2.38037		15.125	-3.2959
15.2031	-2.01416		15.1875	-3.2959
15.3047	-1.2207		15.3125	-3.23486
15.3984	-1.34277		15.375	-3.54004
15.5	-1.64795		15.5	-3.17383
15.6016	-1.2207		15.625	-3.41797
15.7031	-1.15967		15.6875	-2.99072
15.8047	-1.09863		15.8125	-2.92969
15.8984	-0.97656		15.875	-2.92969
16	-0.79346		16	-3.05176
16.1016	-0.48828		16.125	-2.74658
16.2031	-0.67139		16.1875	-2.99072
16.3047	-0.30518		16.3125	-2.74658
16.3984	-0.18311		16.375	-2.31934
16.5	-0.18311		16.5	-2.68555
16.6016	-0.48828		16.625	-2.62451
16.7031	-0.06104		16.6875	-2.68555
16.8047	-0.18311		16.8125	-2.50244
16.8984	0.18311		16.875	-2.38037
17	0.12207		17	-2.38037
17.1016	-0.36621		17.125	-2.0752
17.2031	-0.54932		17.1875	-1.70898
17.3047	-0.79346		17.3125	-2.38037
17.3984	-0.79346		17.375	-2.68555
17.5	-0.73242		17.5	-1.95312
17.6016	-0.67139		17.625	-2.44141
17.7031	-0.73242		17.6875	-2.50244
17.8047	-0.30518		17.8125	-2.38037
17.8984	-0.79346		17.875	-2.56348
18	-0.73242		18	-2.44141
18.1016	-0.54932		18.125	-1.83105
18.2031	-1.09863		18.1875	-1.83105
18.3047	-1.0376		18.3125	-2.13623
18.3984	-0.54932		18.375	-2.0752
18.5	-0.73242		18.5	-2.13623
18.6016	-1.15967		18.625	-1.70898
18.7031	-1.09863		18.6875	-2.01416
18.8047	-1.34277		18.8125	-2.01416
18.8984	-1.2207		18.875	-1.83105
19	-1.40381		19	-2.19727
19.1016	-1.34277		19.125	-2.74658
19.2031	-1.58691		19.1875	-2.56348
19.3047	-1.77002		19.3125	-2.56348
19.3984	-1.83105		19.375	-2.80762
19.5	-1.83105		19.5	-2.62451
19.6016	-2.19727		19.625	-2.56348
19.7031	-1.95312		19.6875	-2.0752
19.8047	-1.46484		19.8125	-2.2583
19.8984	-1.46484		19.875	-2.19727
20	-1.46484		20	-2.13623
20.1016	-1.40381		20.125	-2.50244
20.2031	-1.52588		20.1875	-2.44141
20.3047	-1.34277		20.3125	-2.44141
20.3984	-2.0752		20.375	-2.44141
20.5	-2.01416		20.5	-2.31934
20.6016	-1.89209		20.625	-2.01416
20.7031	-2.19727		20.6875	-2.80762
20.8047	-2.56348		20.8125	-2.99072
20.8984	-1.89209		20.875	-3.05176
21	-2.13623		21	-3.11279
21.1016	-2.2583		21.125	-2.92969
21.2031	-1.95312		21.1875	-3.60107
21.3047	-2.56348		21.3125	-3.479
21.3984	-2.0752		21.375	-3.479
21.5	-1.83105		21.5	-3.90625
21.6016	-1.89209		21.625	-4.02832
21.7031	-1.89209		21.6875	-3.78418
21.8047	-1.83105		21.8125	-3.90625
21.8984	-1.89209		21.875	-4.15039
22	-1.64795		22	-3.54004
22.1016	-1.58691		22.125	-3.41797
22.2031	-1.64795		22.1875	-3.479
22.3047	-0.97656		22.3125	-2.99072
22.3984	-0.97656		22.375	-2.92969
22.5	-0.85449		22.5	-2.99072
22.6016	-1.0376		22.625	-2.99072
22.7031	-1.15967		22.6875	-2.80762
22.8047	-1.28174		22.8125	-2.13623
22.8984	-1.15967		22.875	-2.0752
23	-0.85449		23	-2.01416
23.1016	-0.67139		23.125	-1.70898
23.2031	-0.42725		23.1875	-1.95312
23.3047	-0.36621		23.3125	-1.70898
23.3984	-0.18311		23.375	-1.46484
23.5	-0.54932		23.5	-1.46484
23.6016	-0.30518		23.625	-1.2207
23.7031	-0.06104		23.6875	-1.09863
23.8047	-0.42725		23.8125	-1.34277
23.8984	-0.36621		23.875	-0.79346
24	0.06104		24	-0.61035
24.1016	0.06104		24.125	-0.67139
24.2031	-0.24414		24.1875	0
24.3047	0.06104		24.3125	-0.54932
24.3984	-0.24414		24.375	-0.73242
24.5	0.06104		24.5	-0.36621
24.6016	-0.30518		24.625	-0.24414
24.7031	-0.85449		24.6875	-0.12207
24.8047	-0.42725		24.8125	-0.06104
24.8984	-0.73242		24.875	-0.48828
25	-0.73242		25	-0.79346
25.1016	-0.67139		25.125	-0.24414
25.2031	-0.85449		25.1875	-0.54932
25.3047	-1.46484		25.3125	-0.42725
25.3984	-1.2207		25.375	-0.67139
25.5	-1.89209		25.5	-0.61035
25.6016	-2.19727		25.625	-0.30518
25.7031	-2.38037		25.6875	-0.24414
25.8047	-2.74658		25.8125	-0.61035
25.8984	-2.68555		25.875	-0.91553
26	-2.86865		26	-0.73242
26.1016	-2.68555		26.125	-0.85449
26.2031	-2.99072		26.1875	-0.79346
26.3047	-3.35693		26.3125	-1.28174
26.3984	-3.54004		26.375	-1.46484
26.5	-3.11279		26.5	-1.28174
26.6016	-3.35693		26.625	-1.28174
26.7031	-3.41797		26.6875	-1.2207
26.8047	-3.2959		26.8125	-1.58691
26.8984	-3.479		26.875	-1.70898
27	-3.11279		27	-1.77002
27.1016	-3.05176		27.125	-1.40381
27.2031	-3.11279		27.1875	-1.0376
27.3047	-2.68555		27.3125	-0.91553
27.3984	-2.38037		27.375	-1.83105
27.5	-2.44141		27.5	-1.64795
27.6016	-2.44141		27.625	-1.0376
27.7031	-3.17383		27.6875	-1.70898
27.8047	-3.2959		27.8125	-1.52588
27.8984	-2.56348		27.875	-1.46484
28	-2.19727		28	-1.34277
28.1016	-2.44141		28.125	-1.09863
28.2031	-2.19727		28.1875	-1.2207
28.3047	-2.50244		28.3125	-1.70898
28.3984	-2.44141		28.375	-1.52588
28.5	-2.0752		28.5	-1.70898
28.6016	-2.2583		28.625	-1.83105
28.7031	-2.68555		28.6875	-1.46484
28.8047	-2.50244		28.8125	-2.0752
28.8984	-2.62451		28.875	-2.44141
29	-2.19727		29	-2.0752
29.1016	-1.95312		29.125	-2.13623
29.2031	-1.52588		29.1875	-2.31934
29.3047	-1.70898		29.3125	-1.70898
29.3984	-2.31934		29.375	-1.46484
29.5	-2.86865		29.5	-1.28174
29.6016	-2.86865		29.625	-1.52588
29.7031	-2.44141		29.6875	-1.40381
29.8047	-2.31934		29.8125	-1.46484
29.8984	-2.0752		29.875	-1.77002
30	-2.13623		30	-1.64795
30.1016	-1.70898		30.125	-1.58691
30.2031	-1.83105		30.1875	-1.64795
30.3047	-1.83105		30.3125	-1.28174
30.3984	-1.34277		30.375	-0.85449
30.5	-1.52588		30.5	-0.85449
30.6016	-1.46484		30.625	-0.61035
30.7031	-1.40381		30.6875	-0.54932
30.8047	-1.64795		30.8125	-0.85449
30.8984	-1.77002		30.875	-0.61035
31	-1.28174		31	-1.0376
31.1016	-1.83105		31.125	-1.2207
31.2031	-2.0752		31.1875	-0.73242
31.3047	-1.77002		31.3125	-0.67139
31.3984	-2.13623		31.375	-0.85449
31.5	-2.0752		31.5	-0.48828
31.6016	-2.19727		31.625	-0.12207
31.7031	-2.13623		31.6875	-0.12207
31.8047	-1.95312		31.8125	0.42725
31.8984	-2.01416		31.875	-0.42725
32	-2.56348		32	-0.61035
32.1016	-2.31934		32.125	-0.61035
32.2031	-2.38037		32.1875	-0.79346
32.3047	-2.86865		32.3125	-0.97656
32.3984	-2.80762		32.375	-0.91553
32.5	-2.86865		32.5	-0.85449
32.6016	-2.80762		32.625	-1.0376
32.7031	-2.92969		32.6875	-1.2207
32.8047	-2.68555		32.8125	-1.52588
32.8984	-2.80762		32.875	-1.34277
33	-3.05176		33	-1.64795
33.1016	-3.17383		33.125	-1.52588
33.2031	-3.54004		33.1875	-1.77002
33.3047	-4.08935		33.3125	-2.0752
33.3984	-4.02832		33.375	-1.83105
33.5	-3.479		33.5	-2.0752
33.6016	-3.96728		33.625	-2.38037
33.7031	-3.90625		33.6875	-2.19727
33.8047	-3.72314		33.8125	-2.80762
33.8984	-3.90625		33.875	-3.05176
34	-4.27246		34	-2.92969
34.1016	-4.08935		34.125	-3.23486
34.2031	-4.21143		34.1875	-3.23486
34.3047	-4.02832		34.3125	-2.80762
34.3984	-3.66211		34.375	-3.54004
34.5	-3.78418		34.5	-3.41797
34.6016	-2.92969		34.625	-2.92969
34.7031	-2.68555		34.6875	-2.86865
34.8047	-2.68555		34.8125	-3.05176
34.8984	-2.44141		34.875	-2.74658
35	-2.38037		35	-2.92969
35.1016	-2.44141		35.125	-2.86865
35.2031	-2.19727		35.1875	-2.68555
35.3047	-2.19727		35.3125	-3.05176
35.3984	-2.38037		35.375	-2.86865
35.5	-2.01416		35.5	-3.17383
35.6016	-1.77002		35.625	-2.99072
35.7031	-1.28174		35.6875	-2.68555
35.8047	-0.73242		35.8125	-2.44141
35.8984	-0.54932		35.875	-2.62451
36	-1.0376		36	-2.0752
36.1016	-1.09863		36.125	-2.13623
36.2031	-0.36621		36.1875	-2.38037
36.3047	-0.06104		36.3125	-2.62451
36.3984	-0.36621		36.375	-2.62451
36.5	0.06104		36.5	-2.19727
36.6016	0.54932		36.625	-2.38037
36.7031	0.18311		36.6875	-2.38037
36.8047	0.12207		36.8125	-2.19727
36.8984	0.18311		36.875	-2.68555
37	-0.24414		37	-2.68555
37.1016	-0.18311		37.125	-2.56348
37.2031	-0.24414		37.1875	-2.74658
37.3047	-0.54932		37.3125	-2.62451
37.3984	-0.67139		37.375	-2.01416
37.5	-0.91553		37.5	-2.2583
37.6016	-0.91553		37.625	-2.0752
37.7031	-0.73242		37.6875	-2.0752
37.8047	-0.79346		37.8125	-2.13623
37.8984	-0.73242		37.875	-1.70898
38	-0.42725		38	-2.01416
38.1016	-0.85449		38.125	-2.19727
38.2031	-0.67139		38.1875	-2.01416
38.3047	-0.42725		38.3125	-2.31934
38.3984	-0.97656		38.375	-2.13623
38.5	-1.64795		38.5	-1.46484
38.6016	-1.40381		38.625	-1.58691
38.7031	-1.46484		38.6875	-2.0752
38.8047	-1.09863		38.8125	-2.13623
38.8984	-0.67139		38.875	-2.19727
39	-0.85449		39	-2.2583
39.1016	-0.85449		39.125	-2.50244
39.2031	-1.15967		39.1875	-2.44141
39.3047	-1.0376		39.3125	-2.38037
39.3984	-1.28174		39.375	-2.31934
39.5	-1.46484		39.5	-2.38037
39.6016	-1.46484		39.625	-2.31934
39.7031	-1.15967		39.6875	-2.56348
39.8047	-1.46484		39.8125	-2.56348
39.8984	-1.70898		39.875	-2.31934
40	-1.46484		40	-2.56348
40.1016	-1.58691		40.125	-2.44141
40.2031	-1.2207		40.1875	-2.74658
40.3047	-1.64795		40.3125	-2.74658
40.3984	-1.70898		40.375	-2.50244
40.5	-1.58691		40.5	-2.56348
40.6016	-1.83105		40.625	-3.05176
40.7031	-2.13623		40.6875	-3.11279
40.8047	-1.77002		40.8125	-3.2959
40.8984	-1.77002		40.875	-3.479
41	-2.13623		41	-3.05176
41.1016	-1.40381		41.125	-3.35693
41.2031	-1.70898		41.1875	-3.11279
41.3047	-1.58691		41.3125	-2.86865
41.3984	-1.46484		41.375	-3.41797
41.5	-1.46484		41.5	-4.02832
41.6016	-1.34277		41.625	-3.54004
41.7031	-1.64795		41.6875	-3.41797
41.8047	-1.95312		41.8125	-3.23486
41.8984	-1.95312		41.875	-3.05176
42	-1.64795		42	-3.479
42.1016	-1.89209		42.125	-3.54004
42.2031	-1.52588		42.1875	-3.60107
42.3047	-1.58691		42.3125	-3.35693
42.3984	-1.64795		42.375	-3.17383
42.5	-1.34277		42.5	-3.2959
42.6016	-1.09863		42.625	-3.23486
42.7031	-0.42725		42.6875	-2.92969
42.8047	-0.24414		42.8125	-2.99072
42.8984	-0.30518		42.875	-2.92969
43	-0.67139		43	-2.44141
43.1016	-0.79346		43.125	-2.19727
43.2031	-0.67139		43.1875	-1.40381
43.3047	0.06104		43.3125	-1.58691
43.3984	-0.24414		43.375	-1.64795
43.5	0.06104		43.5	-1.34277
43.6016	0.24414		43.625	-1.58691
43.7031	-0.18311		43.6875	-1.09863
43.8047	0		43.8125	-0.73242
43.8984	-0.18311		43.875	-0.67139
44	-0.67139		44	-0.79346
44.1016	-0.73242		44.125	-0.06104
44.2031	-0.30518		44.1875	-0.61035
44.3047	-0.54932		44.3125	-0.73242
44.3984	-0.42725		44.375	-0.61035
44.5	-0.73242		44.5	-0.67139
44.6016	-1.0376		44.625	-0.42725
44.7031	-0.79346		44.6875	-0.36621
44.8047	-1.0376		44.8125	-0.24414
44.8984	-1.2207		44.875	-0.18311
45	-0.97656		45	-0.61035
45.1016	-1.0376		45.125	-0.85449
45.2031	-1.46484		45.1875	-0.12207
45.3047	-1.34277		45.3125	-0.24414
45.3984	-1.46484		45.375	-0.67139
45.5	-1.64795		45.5	-0.24414
45.6016	-1.89209		45.625	-0.18311
45.7031	-2.38037		45.6875	-0.06104
45.8047	-2.0752		45.8125	-0.06104
45.8984	-2.2583		45.875	-0.73242
46	-2.19727		46	-1.09863
46.1016	-2.44141		46.125	-0.79346
46.2031	-2.86865		46.1875	-0.85449
46.3047	-3.23486		46.3125	-0.73242
46.3984	-3.2959		46.375	-1.28174
46.5	-3.05176		46.5	-1.40381
46.6016	-3.05176		46.625	-1.64795
46.7031	-2.38037		46.6875	-1.77002
46.8047	-2.92969		46.8125	-1.70898
46.8984	-2.80762		46.875	-1.2207
47	-2.62451		47	-1.34277
47.1016	-2.80762		47.125	-1.2207
47.2031	-2.62451		47.1875	-1.15967
47.3047	-2.68555		47.3125	-1.64795
47.3984	-3.17383		47.375	-1.83105
47.5	-3.479		47.5	-1.95312
47.6016	-3.35693		47.625	-1.89209
47.7031	-3.05176		47.6875	-1.34277
47.8047	-2.62451		47.8125	-1.52588
47.8984	-2.99072		47.875	-1.77002
48	-2.99072		48	-1.64795
48.1016	-2.38037		48.125	-1.89209
48.2031	-2.44141		48.1875	-2.19727
48.3047	-2.38037		48.3125	-1.77002
48.3984	-2.0752		48.375	-1.83105
48.5	-2.2583		48.5	-1.95312
48.6016	-2.56348		48.625	-1.34277
48.7031	-2.31934		48.6875	-1.40381
48.8047	-2.31934		48.8125	-1.2207
48.8984	-1.83105		48.875	-1.46484
49	-1.70898		49	-1.58691
49.1016	-1.89209		49.125	-1.83105
49.2031	-1.83105		49.1875	-1.95312
49.3047	-2.13623		49.3125	-1.83105
49.3984	-2.13623		49.375	-2.0752
49.5	-2.01416		49.5	-2.0752
49.6016	-1.64795		49.625	-2.13623
49.7031	-1.77002		49.6875	-1.58691
49.8047	-1.64795		49.8125	-1.58691
49.8984	-1.89209		49.875	-1.52588
50	-1.58691		50	-1.40381
50.1016	-1.77002		50.125	-1.52588
50.2031	-1.83105		50.1875	-1.15967
50.3047	-1.34277		50.3125	-1.40381
50.3984	-1.64795		50.375	-1.40381
50.5	-1.52588		50.5	-1.34277
50.6016	-1.46484		50.625	-1.28174
50.7031	-1.64795		50.6875	-1.2207
50.8047	-1.83105		50.8125	-0.42725
50.8984	-1.58691		50.875	-0.79346
51	-1.70898		51	-0.91553
51.1016	-2.19727		51.125	-0.36621
51.2031	-1.95312		51.1875	-0.54932
51.3047	-2.31934		51.3125	-0.54932
51.3984	-1.89209		51.375	-0.36621
51.5	-1.95312		51.5	-0.54932
51.6016	-1.95312		51.625	-0.61035
51.7031	-1.77002		51.6875	-0.42725
51.8047	-1.77002		51.8125	-0.36621
51.8984	-2.19727		51.875	0.06104
52	-1.95312		52	0.06104
52.1016	-2.38037		52.125	-0.36621
52.2031	-2.44141		52.1875	-0.30518
52.3047	-2.2583		52.3125	-0.61035
52.3984	-2.38037		52.375	-0.48828
52.5	-2.44141		52.5	-0.54932
52.6016	-2.44141		52.625	-0.61035
52.7031	-2.68555		52.6875	-1.15967
52.8047	-2.80762		52.8125	-1.0376
52.8984	-2.80762		52.875	-1.2207
53	-2.92969		53	-1.52588
53.1016	-2.92969		53.125	-1.77002
53.2031	-3.17383		53.1875	-2.19727
53.3047	-3.11279		53.3125	-2.44141
53.3984	-2.86865		53.375	-3.05176
53.5	-3.11279		53.5	-2.74658
53.6016	-2.86865		53.625	-2.62451
53.7031	-2.80762		53.6875	-2.74658
53.8047	-3.2959		53.8125	-2.74658
53.8984	-3.35693		53.875	-2.56348
54	-3.2959		54	-3.05176
54.1016	-3.60107		54.125	-3.60107
54.2031	-3.54004		54.1875	-3.23486
54.3047	-3.23486		54.3125	-3.78418
54.3984	-3.84521		54.375	-3.2959
54.5	-3.17383		54.5	-3.2959
54.6016	-2.99072		54.625	-3.41797
54.7031	-2.68555		54.6875	-3.2959
54.8047	-2.50244		54.8125	-3.2959
54.8984	-2.92969		54.875	-3.72314
55	-2.86865		55	-3.479
55.1016	-2.74658		55.125	-3.66211
55.2031	-2.56348		55.1875	-3.479
55.3047	-2.92969		55.3125	-3.05176
55.3984	-2.19727		55.375	-3.17383
55.5	-2.2583		55.5	-3.41797
55.6016	-2.0752		55.625	-3.35693
55.7031	-1.58691		55.6875	-3.41797
55.8047	-1.58691		55.8125	-3.23486
55.8984	-0.97656		55.875	-3.11279
56	-0.85449		56	-2.86865
56.1016	-0.79346		56.125	-2.68555
56.2031	-0.91553		56.1875	-2.68555
56.3047	-0.85449		56.3125	-2.50244
56.3984	-0.73242		56.375	-1.95312
56.5	-0.36621		56.5	-2.13623
56.6016	-0.42725		56.625	-2.13623
56.7031	-0.61035		56.6875	-1.89209
56.8047	-0.42725		56.8125	-2.13623
56.8984	-0.79346		56.875	-2.0752
57	-0.61035		57	-2.13623
57.1016	-0.61035		57.125	-2.01416
57.2031	-0.42725		57.1875	-2.01416
57.3047	-0.06104		57.3125	-1.83105
57.3984	-0.24414		57.375	-2.0752
57.5	-0.91553		57.5	-1.77002
57.6016	-0.73242		57.625	-1.77002
57.7031	-1.0376		57.6875	-1.95312
57.8047	-1.09863		57.8125	-1.70898
57.8984	-0.42725		57.875	-2.31934
58	-0.91553		58	-2.19727
58.1016	-0.91553		58.125	-2.01416
58.2031	-0.79346		58.1875	-1.95312
58.3047	-0.91553		58.3125	-2.38037
58.3984	-1.2207		58.375	-1.77002
58.5	-0.97656		58.5	-1.70898
58.6016	-1.0376		58.625	-1.70898
58.7031	-1.15967		58.6875	-1.40381
58.8047	-1.09863		58.8125	-1.58691
58.8984	-1.64795		58.875	-1.58691
59	-1.28174		59	-1.83105
59.1016	-1.09863		59.125	-1.70898
59.2031	-0.97656		59.1875	-1.64795
59.3047	-1.2207		59.3125	-1.58691
59.3984	-1.28174		59.375	-2.13623
59.5	-1.40381		59.5	-2.19727
59.6016	-1.34277		59.625	-2.38037
59.7031	-1.52588		59.6875	-2.68555
59.8047	-1.77002		59.8125	-2.19727
59.8984	-1.40381		59.875	-2.13623
60	-1.46484		60	-1.77002
60.1016	-1.15967		60.125	-2.0752
60.2031	-1.46484		60.1875	-2.68555
60.3047	-1.70898		60.3125	-2.74658
60.3984	-1.64795		60.375	-2.80762
60.5	-1.64795		60.5	-2.74658
60.6016	-1.58691		60.625	-2.62451
60.7031	-1.34277		60.6875	-2.62451
60.8047	-1.40381		60.8125	-2.92969
60.8984	-1.70898		60.875	-2.68555
61	-1.34277		61	-3.66211
61.1016	-1.95312		61.125	-3.84521
61.2031	-2.19727		61.1875	-3.11279
61.3047	-1.77002		61.3125	-3.17383
61.3984	-2.01416		61.375	-2.92969
61.5	-1.77002		61.5	-3.17383
61.6016	-1.34277		61.625	-3.54004
61.7031	-1.46484		61.6875	-3.17383
61.8047	-1.64795		61.8125	-2.92969
61.8984	-1.52588		61.875	-3.2959
62	-1.15967		62	-2.99072
62.1016	-0.73242		62.125	-3.41797
62.2031	-0.97656		62.1875	-3.78418
62.3047	-1.2207		62.3125	-3.54004
62.3984	-0.97656		62.375	-3.54004
62.5	-1.15967		62.5	-3.72314
62.6016	-1.15967		62.625	-3.23486
62.7031	-0.79346		62.6875	-2.92969
62.8047	-0.42725		62.8125	-2.68555
62.8984	-0.42725		62.875	-2.38037
63	-0.24414		63	-2.31934
63.1016	-0.36621		63.125	-2.2583
63.2031	-0.30518		63.1875	-2.2583
63.3047	-0.24414		63.3125	-2.01416
63.3984	-0.06104		63.375	-1.58691
63.5	0.67139		63.5	-1.52588
63.6016	0.06104		63.625	-1.2207
63.7031	0.30518		63.6875	-0.97656
63.8047	0.12207		63.8125	-1.09863
63.8984	-0.24414		63.875	-0.73242
64	-0.12207		64	-0.54932
64.1016	0.54932		64.125	-0.91553
64.2031	0.12207		64.1875	-0.61035
64.3047	-0.24414		64.3125	-0.36621
64.3984	0.06104		64.375	-1.09863
64.5	-0.24414		64.5	-0.48828
64.6016	0.06104		64.625	-0.61035
64.7031	-0.12207		64.6875	-0.54932
64.8047	-0.12207		64.8125	-0.24414
64.8984	0.06104		64.875	-0.30518
65	-0.48828		65	-0.30518
65.1016	-1.0376		65.125	-0.48828
65.2031	-1.0376		65.1875	-0.73242
65.3047	-1.34277		65.3125	-1.15967
65.3984	-2.13623		65.375	-0.54932
65.5	-1.89209		65.5	-0.91553
65.6016	-2.38037		65.625	-0.91553
65.7031	-2.38037		65.6875	-0.85449
65.8047	-2.31934		65.8125	-0.73242
65.8984	-2.50244		65.875	-0.85449
66	-2.92969		66	-0.79346
66.1016	-3.05176		66.125	-0.61035
66.2031	-2.86865		66.1875	-0.61035
66.3047	-3.17383		66.3125	-0.91553
66.3984	-3.11279		66.375	-1.2207
66.5	-3.35693		66.5	-0.97656
66.6016	-3.2959		66.625	-1.40381
66.7031	-3.35693		66.6875	-1.64795
66.8047	-2.80762		66.8125	-1.58691
66.8984	-2.62451		66.875	-1.52588
67	-2.92969		67	-1.28174
67.1016	-2.99072		67.125	-1.34277
67.2031	-2.80762		67.1875	-1.34277
67.3047	-2.74658		67.3125	-1.46484
67.3984	-2.99072		67.375	-1.52588
67.5	-3.11279		67.5	-1.52588
67.6016	-3.17383		67.625	-0.97656
67.7031	-2.62451		67.6875	-1.40381
67.8047	-3.17383		67.8125	-2.01416
67.8984	-3.11279		67.875	-1.77002
68	-2.56348		68	-2.0752
68.1016	-2.92969		68.125	-2.2583
68.2031	-2.80762		68.1875	-2.2583
68.3047	-2.19727		68.3125	-2.38037
68.3984	-2.13623		68.375	-2.44141
68.5	-2.50244		68.5	-1.58691
68.6016	-2.31934		68.625	-1.89209
68.7031	-2.92969		68.6875	-1.58691
68.8047	-2.74658		68.8125	-1.64795
68.8984	-2.80762		68.875	-1.89209
69	-2.86865		69	-1.52588
69.1016	-2.44141		69.125	-1.77002
69.2031	-2.19727		69.1875	-1.70898
69.3047	-2.44141		69.3125	-1.83105
69.3984	-2.62451		69.375	-2.0752
69.5	-2.86865		69.5	-2.19727
69.6016	-2.68555		69.625	-1.34277
69.7031	-2.19727		69.6875	-1.52588
69.8047	-2.31934		69.8125	-1.52588
69.8984	-2.13623		69.875	-1.46484
70	-1.77002		70	-1.58691
70.1016	-1.77002		70.125	-1.15967
70.2031	-1.34277		70.1875	-1.28174
70.3047	-1.40381		70.3125	-0.85449
70.3984	-1.40381		70.375	-0.73242
70.5	-1.34277		70.5	-0.91553
70.6016	-1.58691		70.625	-0.73242
70.7031	-1.64795		70.6875	-0.06104
70.8047	-1.64795		70.8125	-0.24414
70.8984	-2.0752		70.875	-0.36621
71	-2.2583		71	-0.12207
71.1016	-1.89209		71.125	-0.61035
71.2031	-2.50244		71.1875	-0.24414
71.3047	-2.31934		71.3125	-0.06104
71.3984	-2.0752		71.375	-0.18311
71.5	-2.01416		71.5	-0.30518
71.6016	-2.01416		71.625	-0.73242
71.7031	-2.13623		71.6875	-0.42725
71.8047	-2.31934		71.8125	0.06104
71.8984	-2.13623		71.875	-0.12207
72	-1.83105		72	0.06104
72.1016	-2.13623		72.125	0.24414
72.2031	-2.13623		72.1875	-0.12207
72.3047	-2.56348		72.3125	-0.73242
72.3984	-2.38037		72.375	-0.12207
72.5	-2.2583		72.5	-0.42725
72.6016	-2.44141		72.625	-1.09863
72.7031	-2.99072		72.6875	-1.28174
72.8047	-2.92969		72.8125	-1.77002
72.8984	-2.92969		72.875	-1.89209
73	-3.60107		73	-1.64795
73.1016	-3.54004		73.125	-1.77002
73.2031	-3.60107		73.1875	-1.83105
73.3047	-3.35693		73.3125	-2.31934
73.3984	-3.41797		73.375	-2.38037
73.5	-3.2959		73.5	-2.31934
73.6016	-3.66211		73.625	-2.50244
73.7031	-4.27246		73.6875	-2.38037
73.8047	-3.96728		73.8125	-2.38037
73.8984	-3.66211		73.875	-2.86865
74	-3.96728		74	-3.11279
74.1016	-4.3335		74.125	-2.62451
74.2031	-3.66211		74.1875	-3.17383
74.3047	-3.54004		74.3125	-3.2959
74.3984	-3.479		74.375	-3.41797
74.5	-3.41797		74.5	-3.2959
74.6016	-3.54004		74.625	-2.92969
74.7031	-3.17383		74.6875	-3.35693
74.8047	-3.23486		74.8125	-3.41797
74.8984	-2.68555		74.875	-3.2959
75	-2.13623		75	-3.54004
75.1016	-1.83105		75.125	-3.60107
75.2031	-1.95312		75.1875	-2.80762
75.3047	-1.58691		75.3125	-2.99072
75.3984	-1.83105		75.375	-2.92969
75.5	-1.95312		75.5	-2.38037
75.6016	-1.52588		75.625	-2.62451
75.7031	-1.64795		75.6875	-2.56348
75.8047	-1.52588		75.8125	-3.05176
75.8984	-1.15967		75.875	-2.86865
76	-0.61035		76	-2.80762
76.1016	-0.61035		76.125	-2.80762
76.2031	-0.48828		76.1875	-2.80762
76.3047	-0.30518		76.3125	-2.44141
76.3984	-0.30518		76.375	-2.44141
76.5	-0.42725		76.5	-2.62451
76.6016	-0.54932		76.625	-2.19727
76.7031	-0.24414		76.6875	-2.0752
76.8047	-0.61035		76.8125	-1.77002
76.8984	-0.36621		76.875	-2.01416
77	0		77	-1.83105
77.1016	-0.24414		77.125	-1.83105
77.2031	-0.30518		77.1875	-2.2583
77.3047	-0.42725		77.3125	-2.13623
77.3984	-0.73242		77.375	-2.2583
77.5	-0.54932		77.5	-2.38037
77.6016	-0.54932		77.625	-2.56348
77.7031	-0.85449		77.6875	-1.77002
77.8047	-0.54932		77.8125	-1.83105
77.8984	-0.91553		77.875	-1.70898
78	-1.2207		78	-1.40381
78.1016	-0.73242		78.125	-1.83105
78.2031	-0.97656		78.1875	-1.64795
78.3047	-0.85449		78.3125	-1.34277
78.3984	-0.48828		78.375	-2.0752
78.5	-0.85449		78.5	-2.44141
78.6016	-1.28174		78.625	-2.2583
78.7031	-0.79346		78.6875	-2.44141
78.8047	-0.67139		78.8125	-1.89209
78.8984	-0.79346		78.875	-2.13623
79	-1.15967		79	-2.31934
79.1016	-1.64795		79.125	-2.44141
79.2031	-1.64795		79.1875	-2.56348
79.3047	-1.77002		79.3125	-2.80762
79.3984	-1.58691		79.375	-2.19727
79.5	-1.46484		79.5	-2.38037
79.6016	-1.34277		79.625	-2.62451
79.7031	-1.70898		79.6875	-2.56348
79.8047	-1.46484		79.8125	-2.80762
79.8984	-1.89209		79.875	-2.56348
80	-1.83105		80	-2.44141
80.1016	-1.52588		80.125	-2.38037
80.2031	-1.58691		80.1875	-2.38037
80.3047	-1.52588		80.3125	-2.44141
80.3984	-1.95312		80.375	-2.44141
80.5	-1.77002		80.5	-2.50244
80.6016	-1.70898		80.625	-2.74658
80.7031	-1.58691		80.6875	-2.99072
80.8047	-1.40381		80.8125	-2.62451
80.8984	-0.91553		80.875	-3.23486
81	-1.40381		81	-3.41797
81.1016	-1.52588		81.125	-3.479
81.2031	-1.09863		81.1875	-3.78418
81.3047	-1.83105		81.3125	-3.41797
81.3984	-1.95312		81.375	-3.84521
81.5	-1.77002		81.5	-3.84521
81.6016	-1.89209		81.625	-3.84521
81.7031	-1.83105		81.6875	-4.15039
81.8047	-1.34277		81.8125	-4.15039
81.8984	-1.64795		81.875	-3.41797
82	-1.52588		82	-3.41797
82.1016	-1.34277		82.125	-3.479
82.2031	-1.34277		82.1875	-2.99072
82.3047	-0.79346		82.3125	-3.54004
82.3984	-1.0376		82.375	-3.23486
82.5	-0.91553		82.5	-3.05176
82.6016	-0.91553		82.625	-3.17383
82.7031	-1.2207		82.6875	-3.35693
82.8047	-1.2207		82.8125	-2.92969
82.8984	-0.91553		82.875	-2.50244
83	-0.97656		83	-2.2583
83.1016	-0.85449		83.125	-2.0752
83.2031	-0.42725		83.1875	-2.44141
83.3047	-0.48828		83.3125	-2.13623
83.3984	0.12207		83.375	-2.0752
83.5	0.12207		83.5	-1.70898
83.6016	0.12207		83.625	-1.46484
83.7031	0.06104		83.6875	-1.09863
83.8047	0.12207		83.8125	-0.91553
83.8984	0.18311		83.875	-0.73242
84	0.24414		84	-0.54932
84.1016	-0.06104		84.125	-0.54932
84.2031	-0.30518		84.1875	-0.85449
84.3047	0.12207		84.3125	-1.15967
84.3984	-0.48828		84.375	-0.79346
84.5	-0.18311		84.5	-0.97656
84.6016	0.06104		84.625	-0.42725
84.7031	-0.36621		84.6875	-0.12207
84.8047	-0.67139		84.8125	-0.79346
84.8984	-0.85449		84.875	-0.91553
85	-0.91553		85	-0.42725
85.1016	-1.28174		85.125	-0.42725
85.2031	-1.70898		85.1875	-0.91553
85.3047	-2.0752		85.3125	-0.36621
85.3984	-2.0752		85.375	-0.61035
85.5	-2.31934		85.5	-0.67139
85.6016	-2.44141		85.625	-1.15967
85.7031	-2.2583		85.6875	-1.2207
85.8047	-2.62451		85.8125	-0.85449
85.8984	-3.17383		85.875	-0.67139
86	-3.2959		86	-0.61035
86.1016	-3.2959		86.125	-0.79346
86.2031	-3.05176		86.1875	-1.2207
86.3047	-3.35693		86.3125	-1.64795
86.3984	-3.11279		86.375	-0.97656
86.5	-2.99072		86.5	-0.79346
86.6016	-3.23486		86.625	-1.0376
86.7031	-2.80762		86.6875	-0.85449
86.8047	-2.50244		86.8125	-0.91553
86.8984	-3.479		86.875	-1.09863
87	-3.84521		87	-1.77002
87.1016	-3.78418		87.125	-1.77002
87.2031	-3.41797		87.1875	-1.70898
87.3047	-3.2959		87.3125	-1.77002
87.3984	-3.23486		87.375	-2.13623
87.5	-3.2959		87.5	-1.46484
87.6016	-2.92969		87.625	-1.46484
87.7031	-2.74658		87.6875	-1.52588
87.8047	-2.80762		87.8125	-1.2207
87.8984	-2.2583		87.875	-1.77002
88	-2.44141		88	-1.58691
88.1016	-2.44141		88.125	-1.77002
88.2031	-2.31934		88.1875	-2.2583
88.3047	-2.74658		88.3125	-1.95312
88.3984	-2.86865		88.375	-2.01416
88.5	-2.13623		88.5	-2.38037
88.6016	-2.38037		88.625	-2.13623
88.7031	-2.74658		88.6875	-2.01416
88.8047	-2.50244		88.8125	-2.19727
88.8984	-2.74658		88.875	-1.95312
89	-2.13623		89	-1.83105
89.1016	-2.0752		89.125	-2.01416
89.2031	-1.95312		89.1875	-1.52588
89.3047	-1.95312		89.3125	-1.34277
89.3984	-1.58691		89.375	-1.70898
89.5	-1.58691		89.5	-1.95312
89.6016	-1.89209		89.625	-2.19727
89.7031	-1.83105		89.6875	-2.0752
89.8047	-1.83105		89.8125	-1.64795
89.8984	-1.64795		89.875	-1.58691
90	-1.95312		90	-1.52588
90.1016	-1.52588		90.125	-1.46484
90.2031	-1.58691		90.1875	-0.97656
90.3047	-1.70898		90.3125	-1.0376
90.3984	-1.89209		90.375	-0.97656
90.5	-2.0752		90.5	-0.85449
90.6016	-2.13623		90.625	-0.48828
90.7031	-1.64795		90.6875	-0.54932
90.8047	-1.46484		90.8125	-0.91553
90.8984	-1.77002		90.875	-0.61035
91	-1.46484		91	-0.85449
91.1016	-2.01416		91.125	-0.42725
91.2031	-1.95312		91.1875	-0.61035
91.3047	-1.70898		91.3125	-0.61035
91.3984	-1.77002		91.375	-0.06104
91.5	-1.46484		91.5	0
91.6016	-1.40381		91.625	0
91.7031	-1.83105		91.6875	0.06104
91.8047	-2.01416		91.8125	-0.06104
91.8984	-1.77002		91.875	-0.48828
92	-2.0752		92	0
92.1016	-1.58691		92.125	-0.54932
92.2031	-2.01416		92.1875	-0.79346
92.3047	-2.2583		92.3125	-0.48828
92.3984	-2.0752		92.375	-0.67139
92.5	-2.0752		92.5	-0.54932
92.6016	-2.38037		92.625	-0.67139
92.7031	-2.74658		92.6875	-0.67139
92.8047	-2.80762		92.8125	-0.79346
92.8984	-3.2959		92.875	-0.67139
93	-2.80762		93	-0.91553
93.1016	-2.99072		93.125	-1.2207
93.2031	-3.11279		93.1875	-2.01416
93.3047	-3.41797		93.3125	-2.44141
93.3984	-3.35693		93.375	-2.13623
93.5	-3.17383		93.5	-2.31934
93.6016	-3.72314		93.625	-2.31934
93.7031	-3.41797		93.6875	-2.19727
93.8047	-3.479		93.8125	-2.31934
93.8984	-3.78418		93.875	-2.68555
94	-3.72314		94	-2.92969
94.1016	-3.17383		94.125	-3.41797
94.2031	-3.60107		94.1875	-3.479
94.3047	-3.90625		94.3125	-3.72314
94.3984	-3.72314		94.375	-3.72314
94.5	-4.02832		94.5	-3.23486
94.6016	-3.479		94.625	-3.84521
94.7031	-3.23486		94.6875	-3.90625
94.8047	-3.60107		94.8125	-3.66211
94.8984	-3.41797		94.875	-3.84521
95	-3.54004		95	-4.02832
95.1016	-3.2959		95.125	-3.479
95.2031	-2.62451		95.1875	-3.41797
95.3047	-2.01416		95.3125	-3.54004
95.3984	-1.83105		95.375	-3.11279
95.5	-1.2207		95.5	-3.05176
95.6016	-1.52588		95.625	-2.50244
95.7031	-1.58691		95.6875	-3.11279
95.8047	-1.09863		95.8125	-3.35693
95.8984	-1.0376		95.875	-3.17383
96	-1.28174		96	-2.68555
96.1016	-1.34277		96.125	-2.56348
96.2031	-0.91553		96.1875	-2.38037
96.3047	-0.42725		96.3125	-2.92969
96.3984	-0.30518		96.375	-2.92969
96.5	-0.18311		96.5	-2.62451
96.6016	0.18311		96.625	-2.68555
96.7031	-0.48828		96.6875	-2.56348
96.8047	-0.54932		96.8125	-2.50244
96.8984	-0.12207		96.875	-2.13623
97	-0.36621		97	-1.95312
97.1016	-0.30518		97.125	-2.0752
97.2031	-0.30518		97.1875	-2.19727
97.3047	-0.54932		97.3125	-2.44141
97.3984	-0.79346		97.375	-2.62451
97.5	-0.54932		97.5	-2.50244
97.6016	-0.91553		97.625	-1.89209
97.7031	-0.67139		97.6875	-2.2583
97.8047	-0.85449		97.8125	-2.01416
97.8984	-0.85449		97.875	-1.83105
98	-0.48828		98	-2.31934
98.1016	-0.61035		98.125	-2.13623
98.2031	-0.61035		98.1875	-2.0752
98.3047	-0.73242		98.3125	-2.01416
98.3984	-0.79346		98.375	-1.89209
98.5	-1.34277		98.5	-1.77002
98.6016	-0.91553		98.625	-1.89209
98.7031	-1.46484		98.6875	-1.46484
98.8047	-1.46484		98.8125	-1.64795
98.8984	-0.85449		98.875	-1.77002
99	-1.09863		99	-1.46484
99.1016	-1.40381		99.125	-1.77002
99.2031	-1.58691		99.1875	-1.70898
99.3047	-1.40381		99.3125	-1.58691
99.3984	-1.40381		99.375	-1.89209
99.5	-1.28174		99.5	-2.2583
99.6016	-1.64795		99.625	-2.19727
99.7031	-1.70898		99.6875	-2.56348
99.8047	-1.64795		99.8125	-2.38037
99.8984	-1.64795		99.875	-2.31934
100	-1.40381		100	-2.38037
100.102	-1.77002		100.125	-2.2583
100.203	-1.70898		100.188	-2.80762
100.305	-1.77002		100.312	-2.62451
100.398	-1.70898		100.375	-2.62451
100.5	-1.64795		100.5	-2.68555
100.602	-1.89209		100.625	-2.92969
100.703	-2.01416		100.688	-2.86865
100.805	-1.64795		100.812	-3.17383
100.898	-1.70898		100.875	-2.99072
101	-1.83105		101	-2.86865
101.102	-1.46484		101.125	-3.41797
101.203	-1.89209		101.188	-3.2959
101.305	-1.70898		101.312	-3.72314
101.398	-0.97656		101.375	-3.90625
101.5	-1.2207		101.5	-3.78418
101.602	-1.77002		101.625	-3.60107
101.703	-1.64795		101.688	-3.479
101.805	-1.89209		101.812	-3.23486
101.898	-1.58691		101.875	-3.54004
102	-1.46484		102	-4.08935
102.102	-1.95312		102.125	-3.60107
102.203	-1.64795		102.188	-3.84521
102.305	-1.46484		102.312	-3.17383
102.398	-1.34277		102.375	-2.56348
102.5	-1.2207		102.5	-2.2583
102.602	-0.73242		102.625	-2.31934
102.703	-0.91553		102.688	-2.31934
102.805	-0.91553		102.812	-2.50244
102.898	-1.15967		102.875	-2.31934
103	-1.15967		103	-2.13623
103.102	-0.67139		103.125	-2.56348
103.203	-0.79346		103.188	-1.83105
103.305	-0.73242		103.312	-1.89209
103.398	-0.61035		103.375	-1.89209
103.5	-0.30518		103.5	-1.58691
103.602	0.24414		103.625	-1.15967
103.703	-0.06104		103.688	-1.0376
103.805	0.18311		103.812	-1.15967
103.898	0.61035		103.875	-0.54932
104	0.36621		104	-0.67139
104.102	-0.30518		104.125	-0.61035
104.203	-0.06104		104.188	-0.73242
104.305	-0.67139		104.312	-0.42725
104.398	-0.61035		104.375	-0.73242
104.5	-0.24414		104.5	-0.73242
104.602	-0.48828		104.625	-0.36621
104.703	-0.06104		104.688	-0.61035
104.805	0.06104		104.812	-0.91553
104.898	-0.42725		104.875	-0.54932
105	-0.79346		105	-0.18311
105.102	-0.85449		105.125	0
105.203	-1.2207		105.188	-0.24414
105.305	-0.97656		105.312	-0.67139
105.398	-1.46484		105.375	-0.61035
105.5	-1.83105		105.5	-0.54932
105.602	-1.70898		105.625	-0.67139
105.703	-2.19727		105.688	-0.30518
105.805	-2.2583		105.812	-0.61035
105.898	-2.31934		105.875	-0.61035
106	-2.50244		106	-0.54932
106.102	-2.50244		106.125	-0.73242
106.203	-2.44141		106.188	-1.0376
106.305	-2.68555		106.312	-0.48828
106.398	-2.86865		106.375	-0.73242
106.5	-3.17383		106.5	-1.0376
106.602	-3.2959		106.625	-0.79346
106.703	-3.17383		106.688	-1.09863
106.805	-3.23486		106.812	-1.09863
106.898	-2.92969		106.875	-1.52588
107	-2.86865		107	-1.2207
107.102	-3.17383		107.125	-1.15967
107.203	-3.2959		107.188	-1.52588
107.305	-3.35693		107.312	-1.58691
107.398	-3.72314		107.375	-1.40381
107.5	-3.479		107.5	-1.28174
107.602	-3.11279		107.625	-1.2207
107.703	-3.2959		107.688	-0.73242
107.805	-2.74658		107.812	-1.34277
107.898	-2.99072		107.875	-1.34277
108	-3.23486		108	-1.70898
108.102	-3.17383		108.125	-1.77002
108.203	-3.05176		108.188	-1.34277
108.305	-2.80762		108.312	-1.46484
108.398	-2.74658		108.375	-1.89209
108.5	-3.17383		108.5	-2.01416
108.602	-3.41797		108.625	-2.13623
108.703	-2.44141		108.688	-2.50244
108.805	-2.62451		108.812	-2.01416
108.898	-2.44141		108.875	-2.19727
109	-1.95312		109	-1.89209
109.102	-2.0752		109.125	-1.64795
109.203	-2.0752		109.188	-1.89209
109.305	-2.0752		109.312	-1.83105
109.398	-2.2583		109.375	-1.58691
109.5	-2.2583		109.5	-1.28174
109.602	-2.0752		109.625	-1.2207
109.703	-2.19727		109.688	-1.2207
109.805	-1.70898		109.812	-1.64795
109.898	-1.95312		109.875	-1.64795
110	-1.89209		110	-1.70898
110.102	-1.70898		110.125	-1.40381
110.203	-1.83105		110.188	-0.85449
110.305	-2.01416		110.312	-0.91553
110.398	-2.19727		110.375	-1.0376
110.5	-1.83105		110.5	-0.91553
110.602	-1.46484		110.625	-0.30518
110.703	-1.34277		110.688	0.12207
110.805	-1.70898		110.812	0.18311
110.898	-1.58691		110.875	-0.36621
111	-1.89209		111	-0.36621
111.102	-2.01416		111.125	-0.30518
111.203	-1.70898		111.188	-0.30518
111.305	-1.83105		111.312	-0.06104
111.398	-1.89209		111.375	-0.61035
111.5	-1.58691		111.5	-0.42725
111.602	-2.13623		111.625	-0.24414
111.703	-2.13623		111.688	-0.12207
111.805	-1.77002		111.812	-0.12207
111.898	-2.01416		111.875	0.30518
112	-2.0752		112	-0.54932
112.102	-1.83105		112.125	-0.61035
112.203	-2.0752		112.188	-0.06104
112.305	-2.2583		112.312	-0.42725
112.398	-2.56348		112.375	-0.24414
112.5	-2.74658		112.5	-0.24414
112.602	-2.68555		112.625	-0.85449
112.703	-2.74658		112.688	-0.73242
112.805	-3.23486		112.812	-0.79346
112.898	-3.17383		112.875	-1.15967
113	-2.92969		113	-0.79346
113.102	-2.74658		113.125	-1.28174
113.203	-2.44141		113.188	-1.95312
113.305	-2.80762		113.312	-1.95312
113.398	-2.80762		113.375	-2.38037
113.5	-3.479		113.5	-2.56348
113.602	-3.60107		113.625	-2.19727
113.703	-3.479		113.688	-2.13623
113.805	-3.41797		113.812	-2.74658
113.898	-3.41797		113.875	-2.99072
114	-3.479		114	-2.74658
114.102	-3.60107		114.125	-2.50244
114.203	-3.60107		114.188	-2.80762
114.305	-3.11279		114.312	-2.92969
114.398	-3.72314		114.375	-3.05176
114.5	-3.41797		114.5	-3.41797
114.602	-2.92969		114.625	-3.05176
114.703	-2.99072		114.688	-2.80762
114.805	-2.86865		114.812	-3.11279
114.898	-2.56348		114.875	-3.11279
115	-2.38037		115	-2.92969
115.102	-2.0752		115.125	-3.17383
115.203	-1.95312		115.188	-3.17383
115.305	-2.38037		115.312	-2.99072
115.398	-2.01416		115.375	-3.41797
115.5	-1.89209		115.5	-2.62451
115.602	-1.83105		115.625	-2.68555
115.703	-1.15967		115.688	-2.56348
115.805	-0.85449		115.812	-2.19727
115.898	-0.91553		115.875	-2.68555
116	-0.79346		116	-2.99072
116.102	-0.54932		116.125	-2.62451
116.203	-0.48828		116.188	-2.31934
116.305	-0.30518		116.312	-2.2583
116.398	-0.61035		116.375	-1.89209
116.5	-0.06104		116.5	-2.31934
116.602	0		116.625	-2.13623
116.703	0.24414		116.688	-2.2583
116.805	0.48828		116.812	-2.19727
116.898	0		116.875	-1.95312
117	-0.18311		117	-2.13623
117.102	-0.30518		117.125	-1.83105
117.203	-0.48828		117.188	-2.0752
117.305	-0.67139		117.312	-2.01416
117.398	-0.42725		117.375	-2.0752
117.5	-0.67139		117.5	-1.40381
117.602	-0.36621		117.625	-1.64795
117.703	-0.12207		117.688	-1.77002
117.805	-0.18311		117.812	-1.83105
117.898	0.18311		117.875	-2.0752
118	-0.36621		118	-1.52588
118.102	-0.36621		118.125	-1.64795
118.203	-0.36621		118.188	-1.58691
118.305	-0.85449		118.312	-1.64795
118.398	-1.34277		118.375	-1.64795
118.5	-0.97656		118.5	-1.83105
118.602	-1.0376		118.625	-1.70898
118.703	-1.34277		118.688	-2.44141
118.805	-1.40381		118.812	-2.86865
118.898	-1.64795		118.875	-2.13623
119	-1.70898		119	-2.2583
119.102	-1.52588		119.125	-1.95312
119.203	-1.46484		119.188	-1.52588
119.305	-1.28174		119.312	-1.70898
119.398	-1.46484		119.375	-1.83105
119.5	-1.77002		119.5	-1.77002
119.602	-1.83105		119.625	-2.2583
119.703	-1.95312		119.688	-2.0752
119.805	-2.19727		119.812	-1.83105
119.898	-2.01416		119.875	-2.44141
120	-2.0752		120	-2.50244
120.102	-1.83105		120.125	-2.80762
120.203	-1.52588		120.188	-2.56348
120.305	-1.70898		120.312	-2.2583
120.398	-1.89209		120.375	-2.13623
120.5	-1.70898		120.5	-2.68555
120.602	-1.58691		120.625	-2.74658
120.703	-1.52588		120.688	-3.05176
120.805	-2.19727		120.812	-3.35693
120.898	-2.44141		120.875	-3.17383
121	-1.70898		121	-3.23486
121.102	-1.64795		121.125	-3.05176
121.203	-1.64795		121.188	-3.66211
121.305	-1.46484		121.312	-3.479
121.398	-1.77002		121.375	-3.35693
121.5	-1.77002		121.5	-3.78418
121.602	-1.28174		121.625	-3.90625
121.703	-1.46484		121.688	-3.84521
121.805	-1.64795		121.812	-3.84521
121.898	-1.40381		121.875	-3.54004
122	-1.58691		122	-3.17383
122.102	-0.97656		122.125	-3.479
122.203	-0.91553		122.188	-3.17383
122.305	-0.85449		122.312	-3.35693
122.398	-0.73242		122.375	-3.90625
122.5	-0.91553		122.5	-3.2959
122.602	-0.73242		122.625	-3.11279
122.703	-0.73242		122.688	-2.99072
122.805	-0.54932		122.812	-2.86865
122.898	-0.97656		122.875	-2.62451
123	-0.42725		123	-2.74658
123.102	-0.42725		123.125	-1.95312
123.203	-0.48828		123.188	-1.95312
123.305	-0.42725		123.312	-2.01416
123.398	-0.67139		123.375	-1.28174
123.5	-0.48828		123.5	-1.52588
123.602	-0.91553		123.625	-1.2207
123.703	-0.48828		123.688	-1.28174
123.805	-0.18311		123.812	-1.0376
123.898	-0.06104		123.875	-0.91553
124	-0.12207		124	-0.42725
124.102	-0.06104		124.125	-0.24414
124.203	-0.42725		124.188	-0.18311
124.305	-0.36621		124.312	-0.30518
124.398	-0.30518		124.375	-0.24414
124.5	-0.85449		124.5	0.18311
124.602	-0.85449		124.625	-0.48828
124.703	-0.61035		124.688	-0.06104
124.805	-0.61035		124.812	0.06104
124.898	-0.54932		124.875	-0.18311
125	-0.42725		125	-0.54932
125.102	-0.97656		125.125	-0.36621
125.203	-1.0376		125.188	-0.54932
125.305	-1.28174		125.312	-0.54932
125.398	-1.77002		125.375	-0.73242
125.5	-1.64795		125.5	-1.15967
125.602	-2.01416		125.625	-0.54932
125.703	-2.19727		125.688	-1.09863
125.805	-2.19727		125.812	-1.09863
125.898	-2.56348		125.875	-0.36621
126	-2.99072		126	-0.67139
126.102	-2.68555		126.125	-0.91553
126.203	-2.44141		126.188	-0.67139
126.305	-2.68555		126.312	-1.0376
126.398	-2.99072		126.375	-1.46484
126.5	-3.35693		126.5	-1.09863
126.602	-3.41797		126.625	-1.58691
126.703	-3.90625		126.688	-1.2207
126.805	-3.41797		126.812	-1.28174
126.898	-3.05176		126.875	-1.2207
127	-2.99072		127	-1.28174
127.102	-3.17383		127.125	-1.64795
127.203	-3.2959		127.188	-1.46484
127.305	-3.72314		127.312	-1.52588
127.398	-3.72314		127.375	-1.70898
127.5	-2.86865		127.5	-2.01416
127.602	-2.86865		127.625	-1.28174
127.703	-2.68555		127.688	-1.52588
127.805	-2.86865		127.812	-1.70898
127.898	-3.05176		127.875	-1.95312
128	-2.56348		128	-1.77002
128.102	-2.74658		128.125	-1.40381
128.203	-2.80762		128.188	-1.83105
128.305	-2.38037		128.312	-2.13623
128.398	-2.13623		128.375	-2.01416
128.5	-2.13623		128.5	-1.83105
128.602	-2.0752		128.625	-1.70898
128.703	-2.62451		128.688	-1.2207
128.805	-2.56348		128.812	-1.70898
128.898	-2.0752		128.875	-2.01416
129	-2.44141		129	-1.70898
129.102	-2.68555		129.125	-2.13623
129.203	-2.62451		129.188	-2.13623
129.305	-2.19727		129.312	-1.70898
129.398	-2.19727		129.375	-1.83105
129.5	-2.2583		129.5	-1.95312
129.602	-2.38037		129.625	-1.64795
129.703	-2.01416		129.688	-1.58691
129.805	-1.95312		129.812	-1.34277
129.898	-2.0752		129.875	-1.52588
130	-2.13623		130	-1.40381
130.102	-2.2583		130.125	-1.09863
130.203	-1.95312		130.188	-1.15967
130.305	-1.89209		130.312	-1.15967
130.398	-1.89209		130.375	-0.67139
130.5	-2.19727		130.5	-0.61035
130.602	-2.2583		130.625	-0.48828
130.703	-2.44141		130.688	-0.24414
130.805	-2.19727		130.812	-0.36621
130.898	-2.19727		130.875	-0.61035
131	-2.13623		131	-0.54932
131.102	-1.64795		131.125	-0.48828
131.203	-2.13623		131.188	0.06104
131.305	-2.0752		131.312	-0.12207
131.398	-2.01416		131.375	-0.06104
131.5	-2.2583		131.5	-0.18311
131.602	-2.0752		131.625	-0.36621
131.703	-1.34277		131.688	-0.30518
131.805	-1.70898		131.812	0.12207
131.898	-1.70898		131.875	0.12207
132	-1.40381		132	-0.24414
132.102	-2.31934		132.125	-0.18311
132.203	-2.50244		132.188	-0.61035
132.305	-2.56348		132.312	-0.12207
132.398	-2.44141		132.375	-0.30518
132.5	-2.44141		132.5	-0.36621
132.602	-2.86865		132.625	-0.30518
132.703	-3.23486		132.688	-0.79346
132.805	-3.11279		132.812	-1.28174
132.898	-3.05176		132.875	-1.09863
133	-3.17383		133	-1.40381
133.102	-2.99072		133.125	-1.95312
133.203	-3.479		133.188	-1.89209
133.305	-3.479		133.312	-2.38037
133.398	-3.66211		133.375	-2.44141
133.5	-3.54004		133.5	-2.31934
133.602	-3.41797		133.625	-2.56348
133.703	-3.60107		133.688	-2.68555
133.805	-3.11279		133.812	-2.74658
133.898	-2.99072		133.875	-3.11279
134	-3.17383		134	-3.41797
134.102	-3.479		134.125	-3.35693
134.203	-2.92969		134.188	-3.35693
134.305	-3.54004		134.312	-3.05176
134.398	-3.479		134.375	-3.35693
134.5	-3.17383		134.5	-3.54004
134.602	-2.99072		134.625	-3.60107
134.703	-2.80762		134.688	-3.66211
134.805	-2.80762		134.812	-3.41797
134.898	-2.86865		134.875	-3.2959
135	-2.62451		135	-2.99072
135.102	-2.38037		135.125	-2.68555
135.203	-2.31934		135.188	-2.86865
135.305	-1.70898		135.312	-3.2959
135.398	-2.0752		135.375	-2.99072
135.5	-1.95312		135.5	-2.92969
135.602	-1.52588		135.625	-2.80762
135.703	-1.28174		135.688	-2.56348
135.805	-1.0376		135.812	-3.17383
135.898	-0.48828		135.875	-3.2959
136	-0.48828		136	-3.05176
136.102	-0.79346		136.125	-3.05176
136.203	-0.73242		136.188	-3.05176
136.305	-0.91553		136.312	-2.44141
136.398	-0.73242		136.375	-2.2583
136.5	-0.36621		136.5	-1.89209
136.602	0.30518		136.625	-1.52588
136.703	0.54932		136.688	-1.89209
136.805	0.12207		136.812	-1.70898
136.898	0.54932		136.875	-2.01416
137	0.48828		137	-1.89209
137.102	-0.06104		137.125	-2.01416
137.203	-0.67139		137.188	-2.2583
137.305	-0.61035		137.312	-2.50244
137.398	-0.42725		137.375	-1.95312
137.5	-0.06104		137.5	-1.64795
137.602	0.06104		137.625	-1.95312
137.703	-0.54932		137.688	-1.64795
137.805	-0.12207		137.812	-1.52588
137.898	-0.30518		137.875	-1.46484
138	-0.24414		138	-1.95312
138.102	-0.54932		138.125	-1.77002
138.203	-0.79346		138.188	-1.70898
138.305	-0.79346		138.312	-2.31934
138.398	-0.97656		138.375	-2.13623
138.5	-1.28174		138.5	-1.64795
138.602	-1.15967		138.625	-1.64795
138.703	-0.67139		138.688	-1.40381
138.805	-1.46484		138.812	-0.97656
138.898	-1.46484		138.875	-1.09863
139	-0.85449		139	-0.85449
139.102	-1.0376		139.125	0.06104
139.203	-1.28174		139.188	1.46484
139.305	-1.28174		139.312	3.84521
139.398	-1.46484		139.375	5.43213
139.5	-1.34277		139.5	7.01904
139.602	-1.2207		139.625	9.39941
139.703	-1.58691		139.688	12.4512
139.805	-1.40381		139.812	14.7705
139.898	-1.46484		139.875	16.4185
140	-1.40381		140	16.1743
140.102	-1.34277		140.125	14.7095
140.203	-1.15967		140.188	12.8784
140.305	-0.85449		140.312	10.1929
140.398	-0.73242		140.375	7.62939
140.5	-0.91553		140.5	5.24902
140.602	-1.2207		140.625	3.23486
140.703	-0.91553		140.688	0.85449
140.805	-1.2207		140.812	-0.79346
140.898	-1.09863		140.875	-2.56348
141	-1.70898		141	-3.90625
141.102	-1.77002		141.125	-4.88281
141.203	-1.70898		141.188	-5.98144
141.305	-1.70898		141.312	-7.14111
141.398	-1.52588		141.375	-8.66699
141.5	-1.15967		141.5	-9.21631
141.602	-1.46484		141.625	-9.33838
141.703	-1.77002		141.688	-9.64355
141.805	-1.15967		141.812	-10.1318
141.898	-1.46484		141.875	-10.3149
142	-1.28174		142	-10.6201
142.102	-0.91553		142.125	-10.2539
142.203	-1.15967		142.188	-9.82666
142.305	-0.97656		142.312	-9.82666
142.398	-1.28174		142.375	-9.0332
142.5	-1.15967		142.5	-9.27734
142.602	-1.0376		142.625	-9.0332
142.703	-0.79346		142.688	-8.42285
142.805	-1.15967		142.812	-8.54492
142.898	-1.0376		142.875	-8.48389
143	-1.0376		143	-7.8125
143.102	-1.0376		143.125	-7.62939
143.203	-0.67139		143.188	-7.14111
143.305	-0.91553		143.312	-6.22559
143.398	-0.48828		143.375	-6.22559
143.5	-0.24414		143.5	-5.37109
143.602	-0.18311		143.625	-4.69971
143.703	-0.24414		143.688	-4.39453
143.805	0		143.812	-3.96728
143.898	0.18311		143.875	-3.41797
144	0.12207		144	-3.2959
144.102	-0.30518		144.125	-3.11279
144.203	-0.30518		144.188	-2.92969
144.305	0.06104		144.312	-2.80762
144.398	-0.54932		144.375	-2.31934
144.5	-0.79346		144.5	-2.38037
144.602	-0.42725		144.625	-2.31934
144.703	-0.61035		144.688	-2.2583
144.805	-0.36621		144.812	-2.01416
144.898	-0.18311		144.875	-1.46484
145	-0.67139		145	-1.46484
145.102	-0.73242		145.125	-1.70898
145.203	-1.0376		145.188	-1.64795
145.305	-1.2207		145.312	-1.58691
145.398	-0.97656		145.375	-1.52588
145.5	-1.28174		145.5	-0.97656
145.602	-1.64795		145.625	-1.46484
145.703	-1.89209		145.688	-1.46484
145.805	-2.38037		145.812	-1.40381
145.898	-3.05176		145.875	-1.64795
146	-2.86865		146	-1.89209
146.102	-2.92969		146.125	-1.46484
146.203	-3.17383		146.188	-1.28174
146.305	-2.68555		146.312	-0.73242
146.398	-3.17383		146.375	-0.85449
146.5	-2.99072		146.5	-1.34277
146.602	-2.80762		146.625	-1.2207
146.703	-2.74658		146.688	-1.40381
146.805	-2.99072		146.812	-1.64795
146.898	-3.479		146.875	-1.77002
147	-3.23486		147	-1.83105
147.102	-3.11279		147.125	-1.83105
147.203	-3.2959		147.188	-1.46484
147.305	-3.35693		147.312	-1.40381
147.398	-2.86865		147.375	-1.34277
147.5	-3.17383		147.5	-1.15967
147.602	-2.99072		147.625	-1.58691
147.703	-2.99072		147.688	-1.52588
147.805	-3.23486		147.812	-1.58691
147.898	-2.86865		147.875	-1.70898
148	-2.74658		148	-1.52588
148.102	-2.44141		148.125	-1.77002
148.203	-2.01416		148.188	-1.58691
148.305	-2.0752		148.312	-1.70898
148.398	-2.2583		148.375	-1.77002
148.5	-2.19727		148.5	-1.77002
148.602	-2.80762		148.625	-1.34277
148.703	-2.99072		148.688	-1.70898
148.805	-2.56348		148.812	-1.77002
148.898	-3.23486		148.875	-1.52588
149	-3.54004		149	-2.13623
149.102	-3.23486		149.125	-2.01416
149.203	-2.68555		149.188	-2.31934
149.305	-2.50244		149.312	-2.44141
149.398	-2.2583		149.375	-1.95312
149.5	-2.56348		149.5	-1.83105
149.602	-2.44141		149.625	-2.0752
149.703	-2.2583		149.688	-1.64795
149.805	-2.01416		149.812	-1.64795
149.898	-1.58691		149.875	-1.89209
150	-2.0752		150	-1.09863
150.102	-2.0752		150.125	-1.2207
150.203	-2.44141		150.188	-1.09863
150.305	-2.56348		150.312	-0.61035
150.398	-2.56348		150.375	-0.42725
150.5	-2.2583		150.5	-0.67139
150.602	-2.13623		150.625	-0.61035
150.703	-1.83105		150.688	-0.67139
150.805	-1.70898		150.812	-0.67139
150.898	-2.13623		150.875	-0.79346
151	-1.64795		151	-0.61035
151.102	-2.01416		151.125	0.12207
151.203	-1.58691		151.188	-0.18311
151.305	-1.2207		151.312	-0.48828
151.398	-1.46484		151.375	-0.36621
151.5	-1.95312		151.5	-0.24414
151.602	-1.58691		151.625	0
151.703	-1.89209		151.688	0.36621
151.805	-2.2583		151.812	0.36621
151.898	-1.58691		151.875	0
152	-2.01416		152	0.06104
152.102	-2.50244		152.125	-0.18311
152.203	-2.74658		152.188	0.12207
152.305	-2.74658		152.312	-0.24414
152.398	-2.62451		152.375	-0.12207
152.5	-2.86865		152.5	0
152.602	-3.2959		152.625	-0.73242
152.703	-3.17383		152.688	-0.97656
152.805	-3.2959		152.812	-0.91553
152.898	-3.2959		152.875	-0.79346
153	-3.11279		153	-1.2207
153.102	-3.17383		153.125	-0.85449
153.203	-3.54004		153.188	-1.70898
153.305	-3.2959		153.312	-2.0752
153.398	-3.2959		153.375	-2.13623
153.5	-3.41797		153.5	-2.74658
153.602	-3.479		153.625	-2.62451
153.703	-3.41797		153.688	-2.99072
153.805	-3.479		153.812	-3.05176
153.898	-3.72314		153.875	-2.99072
154	-3.96728		154	-3.17383
154.102	-3.54004		154.125	-3.35693
154.203	-3.90625		154.188	-2.99072
154.305	-3.90625		154.312	-3.05176
154.398	-3.35693		154.375	-3.23486
154.5	-3.41797		154.5	-3.2959
154.602	-3.05176		154.625	-3.66211
154.703	-2.86865		154.688	-3.72314
154.805	-3.11279		154.812	-3.90625
154.898	-3.11279		154.875	-3.78418
155	-2.80762		155	-3.35693
155.102	-2.86865		155.125	-3.54004
155.203	-1.95312		155.188	-3.41797
155.305	-1.40381		155.312	-3.11279
155.398	-1.28174		155.375	-3.2959
155.5	-1.0376		155.5	-3.11279
155.602	-1.15967		155.625	-2.92969
155.703	-0.79346		155.688	-2.92969
155.805	-0.79346		155.812	-2.74658
155.898	-0.79346		155.875	-2.50244
156	-1.09863		156	-2.62451
156.102	-0.73242		156.125	-2.80762
156.203	-0.85449		156.188	-2.62451
156.305	-0.67139		156.312	-2.62451
156.398	-0.06104		156.375	-2.62451
156.5	0.12207		156.5	-2.74658
156.602	0.30518		156.625	-2.86865
156.703	0		156.688	-2.31934
156.805	0.48828		156.812	-2.62451
156.898	0.61035		156.875	-2.68555
157	0.30518		157	-2.44141
157.102	0.12207		157.125	-2.56348
157.203	-0.06104		157.188	-2.44141
157.305	-0.42725		157.312	-2.0752
157.398	-0.67139		157.375	-2.19727
157.5	0.06104		157.5	-2.62451
157.602	-0.24414		157.625	-1.95312
157.703	0.06104		157.688	-1.95312
157.805	0.12207		157.812	-1.89209
157.898	-0.06104		157.875	-1.95312
158	-0.06104		158	-1.64795
158.102	-0.18311		158.125	-1.58691
158.203	-0.36621		158.188	-2.2583
158.305	-0.36621		158.312	-2.38037
158.398	-0.36621		158.375	-2.19727
158.5	-0.79346		158.5	-2.0752
158.602	-0.30518		158.625	-2.50244
158.703	-0.61035		158.688	-2.19727
158.805	-0.79346		158.812	-2.44141
158.898	-0.48828		158.875	-2.19727
159	-0.61035		159	-1.83105
159.102	-0.79346		159.125	-1.77002
159.203	-0.79346		159.188	-1.2207
159.305	-0.73242		159.312	-1.64795
159.398	-0.73242		159.375	-1.52588
159.5	-0.54932		159.5	-1.58691
159.602	-0.79346		159.625	-1.70898
159.703	-0.67139		159.688	-1.83105
159.805	-0.54932		159.812	-1.95312
159.898	-0.06104		159.875	-2.50244
160	0.30518		160	-2.99072
160.102	0.42725		160.125	-2.38037
160.203	2.2583		160.188	-2.68555
160.305	4.69971		160.312	-2.56348
160.398	6.46973		160.375	-2.68555
160.5	8.05664		160.5	-2.74658
160.602	10.6201		160.625	-2.86865
160.703	13.4888		160.688	-2.86865
160.805	15.564		160.812	-3.23486
160.898	14.4043		160.875	-3.23486
161	11.1084		161	-3.60107
161.102	7.56836		161.125	-4.21143
161.203	3.84521		161.188	-4.15039
161.305	0.97656		161.312	-4.27246
161.398	-0.79346		161.375	-4.08935
161.5	-2.50244		161.5	-4.08935
161.602	-3.66211		161.625	-4.15039
161.703	-4.02832		161.688	-4.02832
161.805	-5.00488		161.812	-3.66211
161.898	-5.92041		161.875	-3.66211
162	-6.16455		162	-3.60107
162.102	-6.71387		162.125	-3.66211
162.203	-6.22559		162.188	-3.60107
162.305	-5.79834		162.312	-2.86865
162.398	-5.79834		162.375	-3.11279
162.5	-5.85937		162.5	-2.99072
162.602	-6.10352		162.625	-2.74658
162.703	-6.53076		162.688	-2.86865
162.805	-6.28662		162.812	-2.80762
162.898	-5.85937		162.875	-2.50244
163	-5.67627		163	-2.50244
163.102	-5.06592		163.125	-2.19727
163.203	-5.00488		163.188	-1.89209
163.305	-4.3335		163.312	-1.89209
163.398	-4.08935		163.375	-1.77002
163.5	-3.66211		163.5	-1.64795
163.602	-3.11279		163.625	-1.15967
163.703	-2.50244		163.688	-1.09863
163.805	-2.44141		163.812	-1.34277
163.898	-2.50244		163.875	-1.34277
164	-2.31934		164	-1.0376
164.102	-2.2583		164.125	-0.36621
164.203	-1.58691		164.188	-0.61035
164.305	-1.77002		164.312	-0.48828
164.398	-1.2207		164.375	-0.67139
164.5	-0.67139		164.5	-0.61035
164.602	-0.85449		164.625	-0.30518
164.703	-1.09863		164.688	-0.36621
164.805	-1.0376		164.812	-0.36621
164.898	-1.0376		164.875	-0.73242
165	-1.09863		165	-0.42725
165.102	-0.79346		165.125	-0.12207
165.203	-1.40381		165.188	-0.36621
165.305	-1.52588		165.312	-0.67139
165.398	-1.64795		165.375	-0.30518
165.5	-1.70898		165.5	-0.48828
165.602	-1.89209		165.625	-0.48828
165.703	-2.44141		165.688	-0.42725
165.805	-2.99072		165.812	-1.28174
165.898	-3.11279		165.875	-1.15967
166	-3.23486		166	-1.46484
166.102	-3.60107		166.125	-1.58691
166.203	-2.99072		166.188	-1.34277
166.305	-3.11279		166.312	-1.28174
166.398	-3.35693		166.375	-1.70898
166.5	-2.86865		166.5	-1.28174
166.602	-2.92969		166.625	-1.28174
166.703	-2.86865		166.688	-1.46484
166.805	-3.23486		166.812	-1.2207
166.898	-2.92969		166.875	-1.58691
167	-2.80762		167	-1.70898
167.102	-2.62451		167.125	-1.52588
167.203	-3.11279		167.188	-1.52588
167.305	-2.92969		167.312	-1.64795
167.398	-3.11279		167.375	-1.52588
167.5	-3.2959		167.5	-2.01416
167.602	-2.80762		167.625	-2.13623
167.703	-3.17383		167.688	-1.77002
167.805	-2.80762		167.812	-1.64795
167.898	-2.80762		167.875	-1.40381
168	-2.74658		168	-1.64795
168.102	-2.56348		168.125	-1.15967
168.203	-2.44141		168.188	-1.09863
168.305	-2.50244		168.312	-1.46484
168.398	-2.31934		168.375	-1.89209
168.5	-2.50244		168.5	-1.89209
168.602	-2.74658		168.625	-1.83105
168.703	-2.44141		168.688	-2.01416
168.805	-2.74658		168.812	-1.70898
168.898	-2.99072		168.875	-1.77002
169	-2.2583		169	-1.58691
169.102	-2.19727		169.125	-2.13623
169.203	-2.31934		169.188	-1.95312
169.305	-1.64795		169.312	-1.64795
169.398	-2.13623		169.375	-1.83105
169.5	-2.56348		169.5	-1.70898
169.602	-2.38037		169.625	-1.40381
169.703	-2.38037		169.688	-1.09863
169.805	-2.13623		169.812	-1.64795
169.898	-1.95312		169.875	-1.0376
170	-1.52588		170	-1.15967
170.102	-1.40381		170.125	-0.97656
170.203	-1.58691		170.188	-0.42725
170.305	-1.70898		170.312	-0.61035
170.398	-1.58691		170.375	-0.54932
170.5	-1.77002		170.5	-0.61035
170.602	-1.83105		170.625	-0.73242
170.703	-1.34277		170.688	-0.61035
170.805	-1.64795		170.812	-0.54932
170.898	-1.58691		170.875	-0.73242
171	-1.64795		171	-0.36621
171.102	-1.77002		171.125	-0.36621
171.203	-1.46484		171.188	-0.06104
171.305	-1.77002		171.312	0.42725
171.398	-2.01416		171.375	0.06104
171.5	-2.01416		171.5	-0.12207
171.602	-2.19727		171.625	0.06104
171.703	-2.38037		171.688	0.12207
171.805	-1.52588		171.812	0
171.898	-2.19727		171.875	-0.24414
172	-2.19727		172	-0.24414
172.102	-1.64795		172.125	-0.36621
172.203	-2.0752		172.188	-0.54932
172.305	-2.13623		172.312	-0.48828
172.398	-2.0752		172.375	-0.36621
172.5	-2.38037		172.5	-0.73242
172.602	-2.74658		172.625	-0.67139
172.703	-2.86865		172.688	-0.61035
172.805	-2.86865		172.812	-1.2207
172.898	-2.68555		172.875	-1.70898
173	-2.92969		173	-1.64795
173.102	-3.41797		173.125	-2.13623
173.203	-3.2959		173.188	-2.19727
173.305	-3.60107		173.312	-2.19727
173.398	-3.60107		173.375	-2.80762
173.5	-3.54004		173.5	-2.44141
173.602	-3.35693		173.625	-2.80762
173.703	-3.479		173.688	-2.99072
173.805	-3.23486		173.812	-2.74658
173.898	-3.54004		173.875	-2.74658
174	-3.54004		174	-2.99072
174.102	-3.60107		174.125	-2.92969
174.203	-3.2959		174.188	-3.23486
174.305	-3.11279		174.312	-3.96728
174.398	-3.84521		174.375	-3.17383
174.5	-3.479		174.5	-3.17383
174.602	-3.35693		174.625	-3.11279
174.703	-3.23486		174.688	-3.35693
174.805	-3.2959		174.812	-3.2959
174.898	-2.99072		174.875	-3.11279
175	-3.2959		175	-3.17383
175.102	-2.80762		175.125	-3.11279
175.203	-2.2583		175.188	-3.2959
175.305	-2.50244		175.312	-3.41797
175.398	-2.0752		175.375	-3.54004
175.5	-2.01416		175.5	-2.80762
175.602	-1.64795		175.625	-2.92969
175.703	-1.0376		175.688	-2.92969
175.805	-1.09863		175.812	-3.05176
175.898	-1.34277		175.875	-3.35693
176	-1.0376		176	-2.68555
176.102	-1.0376		176.125	-2.2583
176.203	-1.2207		176.188	-2.38037
176.305	-0.30518		176.312	-2.56348
176.398	-0.48828		176.375	-2.56348
176.5	-0.48828		176.5	-2.68555
176.602	-0.30518		176.625	-2.31934
176.703	-0.30518		176.688	-2.31934
176.805	-0.12207		176.812	-2.2583
176.898	0.12207		176.875	-1.70898
177	0.42725		177	-2.31934
177.102	0.36621		177.125	-2.2583
177.203	0		177.188	-1.70898
177.305	0.06104		177.312	-1.70898
177.398	0.61035		177.375	-1.95312
177.5	0.06104		177.5	-1.83105
177.602	-0.12207		177.625	-1.95312
177.703	-0.18311		177.688	-1.70898
177.805	-0.97656		177.812	-1.77002
177.898	-1.15967		177.875	-1.83105
178	-0.91553		178	-1.40381
178.102	-0.97656		178.125	-1.89209
178.203	-0.85449		178.188	-1.58691
178.305	-1.0376		178.312	-1.58691
178.398	-0.97656		178.375	-1.77002
178.5	-0.67139		178.5	-1.89209
178.602	-0.67139		178.625	-1.52588
178.703	-0.61035		178.688	-1.83105
178.805	-0.36621		178.812	-1.83105
178.898	-0.73242		178.875	-1.95312
179	-1.0376		179	-2.13623
179.102	-0.97656		179.125	-1.95312
179.203	-1.2207		179.188	-1.89209
179.305	-1.58691		179.312	-1.70898
179.398	-1.40381		179.375	-1.34277
179.5	-1.40381		179.5	-1.64795
179.602	-1.34277		179.625	-1.89209
179.703	-1.46484		179.688	-1.58691
179.805	-1.77002		179.812	-2.44141
179.898	-1.46484		179.875	-2.92969
180	-1.77002		180	-2.74658
180.102	-1.34277		180.125	-2.80762
180.203	-1.28174		180.188	-2.50244
180.305	-1.46484		180.312	-2.01416
180.398	-1.89209		180.375	-2.01416
180.5	-1.83105		180.5	-2.31934
180.602	-1.95312		180.625	-2.38037
180.703	-2.01416		180.688	-2.56348
180.805	-1.89209		180.812	-2.68555
180.898	-2.31934		180.875	-3.11279
181	-1.46484		181	-3.66211
181.102	-1.46484		181.125	-3.2959
181.203	-1.40381		181.188	-3.41797
181.305	-1.46484		181.312	-3.41797
181.398	-1.64795		181.375	-3.11279
181.5	-1.70898		181.5	-3.23486
181.602	-1.64795		181.625	-3.54004
181.703	-1.58691		181.688	-3.479
181.805	-1.77002		181.812	-3.41797
181.898	-1.46484		181.875	-3.41797
182	-2.0752		182	-3.479
182.102	-1.89209		182.125	-3.78418
182.203	-1.34277		182.188	-3.479
182.305	-1.28174		182.312	-3.60107
182.398	-1.09863		182.375	-3.41797
182.5	-0.73242		182.5	-2.86865
182.602	-0.91553		182.625	-3.05176
182.703	-1.0376		182.688	-2.86865
182.805	-0.79346		182.812	-2.38037
182.898	-1.0376		182.875	-2.44141
183	-0.61035		183	-2.50244
183.102	-0.67139		183.125	-2.01416
183.203	-0.61035		183.188	-2.19727
183.305	-0.42725		183.312	-1.58691
183.398	-0.12207		183.375	-1.09863
183.5	0.24414		183.5	-1.15967
183.602	0.48828		183.625	-0.73242
183.703	0.36621		183.688	-1.0376
183.805	0.06104		183.812	-1.2207
183.898	0.42725		183.875	-1.2207
184	0.30518		184	-1.15967
184.102	0.30518		184.125	-1.15967
184.203	0.12207		184.188	-0.61035
184.305	0.06104		184.312	-0.48828
184.398	-0.12207		184.375	-0.18311
184.5	-0.91553		184.5	0.24414
184.602	-0.73242		184.625	0
184.703	-0.54932		184.688	0.06104
184.805	-0.79346		184.812	-0.30518
184.898	-1.09863		184.875	-0.48828
185	-0.67139		185	-0.48828
185.102	-0.97656		185.125	-0.48828
185.203	-0.91553		185.188	-0.48828
185.305	-0.85449		185.312	-0.48828
185.398	-1.2207		185.375	-0.67139
185.5	-1.58691		185.5	-0.61035
185.602	-1.95312		185.625	0
185.703	-2.44141		185.688	-0.67139
185.805	-2.50244		185.812	-0.67139
185.898	-2.50244		185.875	-0.91553
186	-2.92969		186	-1.28174
186.102	-2.99072		186.125	-1.34277
186.203	-3.17383		186.188	-1.09863
186.305	-3.479		186.312	-1.15967
186.398	-3.11279		186.375	-1.0376
186.5	-3.11279		186.5	-1.28174
186.602	-3.17383		186.625	-1.70898
186.703	-3.41797		186.688	-1.34277
186.805	-3.11279		186.812	-1.83105
186.898	-2.99072		186.875	-1.83105
187	-3.05176		187	-1.15967
187.102	-3.2959		187.125	-1.28174
187.203	-3.2959		187.188	-1.46484
187.305	-3.54004		187.312	-1.15967
187.398	-3.60107		187.375	-1.58691
187.5	-3.17383		187.5	-1.77002
187.602	-3.35693		187.625	-1.58691
187.703	-3.05176		187.688	-1.70898
187.805	-2.86865		187.812	-1.34277
187.898	-3.17383		187.875	-1.77002
188	-2.80762		188	-1.77002
188.102	-2.31934		188.125	-1.40381
188.203	-2.38037		188.188	-1.64795
188.305	-2.31934		188.312	-1.89209
188.398	-2.38037		188.375	-1.77002
188.5	-2.68555		188.5	-1.70898
188.602	-2.2583		188.625	-1.64795
188.703	-2.56348		188.688	-2.0752
188.805	-2.56348		188.812	-2.13623
188.898	-2.56348		188.875	-2.01416
189	-2.80762		189	-2.0752
189.102	-2.86865		189.125	-1.83105
189.203	-2.19727		189.188	-1.28174
189.305	-1.95312		189.312	-1.58691
189.398	-2.50244		189.375	-1.58691
189.5	-1.95312		189.5	-1.58691
189.602	-2.01416		189.625	-1.52588
189.703	-1.89209		189.688	-1.64795
189.805	-1.89209		189.812	-1.34277
189.898	-2.13623		189.875	-1.58691
190	-2.19727		190	-1.40381
190.102	-2.2583		190.125	-0.91553
190.203	-1.77002		190.188	-1.15967
190.305	-1.77002		190.312	-0.67139
190.398	-1.77002		190.375	-0.79346
190.5	-2.13623		190.5	-0.97656
190.602	-1.89209		190.625	-0.73242
190.703	-2.13623		190.688	-0.36621
190.805	-2.01416		190.812	-0.48828
190.898	-1.70898		190.875	-0.06104
191	-1.77002		191	0
191.102	-1.64795		191.125	-0.06104
191.203	-1.95312		191.188	0.36621
191.305	-1.70898		191.312	-0.36621
191.398	-1.64795		191.375	-0.36621
191.5	-1.70898		191.5	-0.36621
191.602	-1.64795		191.625	-0.18311
191.703	-1.2207		191.688	-0.30518
191.805	-1.89209		191.812	-0.24414
191.898	-2.38037		191.875	-0.18311
192	-1.89209		192	-0.42725
192.102	-2.13623		192.125	-0.61035
192.203	-1.77002		192.188	-0.73242
192.305	-1.40381		192.312	-0.42725
192.398	-1.58691		192.375	-0.73242
192.5	-1.89209		192.5	-0.91553
192.602	-1.77002		192.625	-1.09863
192.703	-2.19727		192.688	-1.2207
192.805	-2.31934		192.812	-1.34277
192.898	-2.80762		192.875	-1.46484
193	-3.17383		193	-1.83105
193.102	-2.68555		193.125	-1.83105
193.203	-2.92969		193.188	-1.83105
193.305	-2.99072		193.312	-2.62451
193.398	-2.99072		193.375	-2.56348
193.5	-3.17383		193.5	-2.99072
193.602	-3.72314		193.625	-3.23486
193.703	-4.02832		193.688	-2.68555
193.805	-4.02832		193.812	-2.92969
193.898	-3.84521		193.875	-2.86865
194	-3.66211		194	-2.68555
194.102	-3.66211		194.125	-2.86865
194.203	-3.11279		194.188	-3.17383
194.305	-3.60107		194.312	-3.23486
194.398	-3.54004		194.375	-3.72314
194.5	-3.479		194.5	-3.41797
194.602	-3.54004		194.625	-3.11279
194.703	-2.99072		194.688	-3.23486
194.805	-2.68555		194.812	-3.05176
194.898	-2.92969		194.875	-3.23486
195	-2.80762		195	-2.68555
195.102	-2.19727		195.125	-2.68555
195.203	-2.19727		195.188	-2.56348
195.305	-2.13623		195.312	-2.92969
195.398	-2.31934		195.375	-2.62451
195.5	-2.31934		195.5	-2.62451
195.602	-2.0752		195.625	-2.74658
195.703	-2.0752		195.688	-2.56348
195.805	-2.01416		195.812	-2.86865
195.898	-1.52588		195.875	-2.92969
196	-0.73242		196	-3.11279
196.102	-0.54932		196.125	-3.05176
196.203	-0.06104		196.188	-2.44141
196.305	-0.24414		196.312	-2.31934
196.398	-0.54932		196.375	-2.44141
196.5	-0.24414		196.5	-2.19727
196.602	0.06104		196.625	-2.38037
196.703	0.48828		196.688	-2.0752
196.805	0.30518		196.812	-1.83105
196.898	0.18311		196.875	-2.44141
197	-0.18311		197	-2.2583
197.102	0		197.125	-1.34277
197.203	-0.18311		197.188	-1.77002
197.305	-0.24414		197.312	-1.89209
197.398	-0.30518		197.375	-1.58691
197.5	-0.06104		197.5	-1.89209
197.602	0.12207		197.625	-1.89209
197.703	-0.61035		197.688	-1.83105
197.805	-0.48828		197.812	-2.2583
197.898	-0.36621		197.875	-2.19727
198	-0.73242		198	-2.56348
198.102	-1.09863		198.125	-2.56348
198.203	-1.15967		198.188	-2.2583
198.305	-1.52588		198.312	-2.0752
198.398	-1.09863		198.375	-2.0752
198.5	-1.09863		198.5	-1.77002
198.602	-0.97656		198.625	-1.64795
198.703	-0.54932		198.688	-1.83105
198.805	-1.2207		198.812	-1.70898
198.898	-1.46484		198.875	-1.95312
199	-1.2207		199	-1.70898
199.102	-1.2207		199.125	-1.89209
199.203	-1.2207		199.188	-1.95312
199.305	-0.61035		199.312	-2.01416
199.398	-0.97656		199.375	-2.31934
199.5	-1.28174		199.5	-2.56348
199.602	-1.09863		199.625	-2.56348
199.703	-1.46484		199.688	-2.50244
[truncated: 100,800 more rows]

## Sheet: B iii
ACSF	ZD7288	ACSF
1.49	1.82	2
0.8	0.67	0.75
1.64	1.13	1.2
2.46	2.45	2
2.18	2.2	2
