# Supplementary material for: The cation channel mechanisms of subthreshold inward depolarizing currents in the mice VTA dopaminergic neurons and their roles in the chronic-stress-induced depression-like behavior
Source: eLife. 2024 Dec 6;12:RP88319. doi: 10.7554/eLife.88319 (PMC11623934; doi:10.7554/eLife.88319)
Supplement: Figure 2—figure supplement 4—source data 3. [file elife-88319-fig2-figsupp4-data3.xlsx]

## Sheet: sFigure 4 C i
0	-49.6962
0.9	-49.6148
1.8	-49.6114
2.7	-49.6352
3.6	-49.6996
4.5	-49.6318
5.4	-49.5741
6.3	-49.4826
7.2	-49.4622
8.1	-49.3368
9	-49.2554
9.9	-49.2486
10.8	-49.33
11.7	-49.2621
12.6	-49.2621
13.5	-49.3062
14.4	-49.2655
15.3	-49.2961
16.2	-49.3774
17.1	-49.4554
18	-49.5504
18.9	-49.625
19.8	-49.6046
20.7	-49.5775
21.6	-49.6623
22.5	-49.6996
23.4	-49.7979
24.3	-49.8115
25.2	-49.7776
26.1	-49.7403
27	-49.7064
27.9	-49.6724
28.8	-49.7131
29.7	-49.842
30.6	-49.8454
31.5	-49.8386
32.4	-49.7979
33.3	-49.7369
34.2	-49.6826
35.1	-49.6623
36	-49.669
36.9	-49.608
37.8	-49.6928
38.7	-49.7301
39.6	-49.6792
40.5	-49.6216
41.4	-49.6555
42.3	-49.6894
43.2	-49.7369
44.1	-49.764
45	-49.703
45.9	-49.6962
46.8	-49.7945
47.7	-49.7199
48.6	-49.6962
49.5	-49.7877
50.4	-49.825
51.3	-49.8115
52.2	-49.8318
53.1	-49.8556
54	-49.8115
54.9	-49.764
55.8	-49.6894
56.7	-49.5165
57.6	-49.5097
58.5	-49.5131
59.4	-49.4826
60.3	-49.4215
61.2	-49.3774
62.1	-49.4012
63	-49.5029
63.9	-49.608
64.8	-49.5741
65.7	-49.5877
66.6	-49.669
67.5	-49.625
68.4	-49.6589
69.3	-49.7437
70.2	-49.8996
71.1	-50.0081
72	-50.0421
72.9	-50.0081
73.8	-49.9878
74.7	-50.0726
75.6	-50.1065
76.5	-50.1065
77.4	-50.1743
78.3	-50.1438
79.2	-50.1302
80.1	-50.0861
81	-50.0319
81.9	-50.0556
82.8	-50.0827
83.7	-50.1302
84.6	-50.0827
85.5	-50.0624
86.4	-50.0793
87.3	-50.0963
88.2	-50.0319
89.1	-50.0048
90	-50.0793
90.9	-50.1404
91.8	-50.137
92.7	-50.0861
93.6	-50.0421
94.5	-50.0421
95.4	-50.0454
96.3	-50.059
97.2	-50.0319
98.1	-50.0319
99	-50.0624
99.9	-50.0048
100.8	-49.9437
101.7	-49.9335
102.6	-49.9098
103.5	-49.8861
104.4	-49.8115
105.3	-49.7267
106.2	-49.6318
107.1	-49.6114
108	-49.5979
108.9	-49.5673
109.8	-49.4995
110.7	-49.4792
111.6	-49.374
112.5	-49.4147
113.4	-49.4181
114.3	-49.374
115.2	-49.3605
116.1	-49.3808
117	-49.3774
117.9	-49.3876
118.8	-49.4012
119.7	-49.374
120.6	-49.3266
121.5	-49.313
122.4	-49.3334
123.3	-49.452
124.2	-49.469
125.1	-49.4961
126	-49.452
126.9	-49.4656
127.8	-49.4724
128.7	-49.4758
129.6	-49.6148
130.5	-49.6623
131.4	-49.6724
132.3	-49.6724
133.2	-49.6012
134.1	-49.5673
135	-49.5911
135.9	-49.6114
136.8	-49.6148
137.7	-49.669
138.6	-49.6487
139.5	-49.6216
140.4	-49.5232
141.3	-49.4927
142.2	-49.5572
143.1	-49.625
144	-49.6453
144.9	-49.625
145.8	-49.625
146.7	-49.6724
147.6	-49.5843
148.5	-49.4893
149.4	-49.5199
150.3	-49.5673
151.2	-49.53
152.1	-49.4792
153	-49.4453
153.9	-49.4588
154.8	-49.5334
155.7	-49.5979
156.6	-49.5572
157.5	-49.5741
158.4	-49.5809
159.3	-49.5063
160.2	-49.452
161.1	-49.4351
162	-49.3774
162.9	-49.4758
163.8	-49.5131
164.7	-49.4995
165.6	-49.4453
166.5	-49.4046
167.4	-49.3469
168.3	-49.2825
169.2	-49.2791
170.1	-49.3334
171	-49.3707
171.9	-49.4419
172.8	-49.4215
173.7	-49.408
174.6	-49.3774
175.5	-49.3707
176.4	-49.2621
177.3	-49.2961
178.2	-49.2621
179.1	-49.2181
180	-49.1876
180.9	-49.0689
181.8	-49.0553
182.7	-49.1028
183.6	-49.0689
184.5	-49.0553
185.4	-49.0112
186.3	-49.0519
187.2	-49.0011
188.1	-48.9875
189	-49.0519
189.9	-49.1638
190.8	-49.2418
191.7	-49.2791
192.6	-49.2384
193.5	-49.2791
194.4	-49.3028
195.3	-49.33
196.2	-49.3503
197.1	-49.3774
198	-49.3435
198.9	-49.313
199.8	-49.235
200.7	-49.1943
201.6	-49.174
202.5	-49.235
203.4	-49.2384
204.3	-49.252
205.2	-49.2011
206.1	-49.2316
207	-49.1977
207.9	-49.1367
208.8	-49.1638
209.7	-49.1706
210.6	-49.252
211.5	-49.2961
212.4	-49.2723
213.3	-49.3503
214.2	-49.33
215.1	-49.3232
216	-49.3537
216.9	-49.4113
217.8	-49.4249
218.7	-49.4249
219.6	-49.3537
220.5	-49.2995
221.4	-49.2316
222.3	-49.2791
223.2	-49.33
224.1	-49.2452
225	-49.1502
225.9	-49.1197
226.8	-48.9841
227.7	-48.9638
228.6	-48.94
229.5	-49.0791
230.4	-49.1842
231.3	-49.1977
232.2	-49.1197
233.1	-49.0587
234	-49.0485
234.9	-49.018
235.8	-49.0146
236.7	-49.113
237.6	-49.0791
238.5	-49.0791
239.4	-49.0655
240.3	-49.0485
241.2	-49.0553
242.1	-49.113
243	-49.1469
243.9	-49.1943
244.8	-49.1706
245.7	-49.1842
246.6	-49.1774
247.5	-49.174
248.4	-49.1536
249.3	-49.2147
250.2	-49.3198
251.1	-49.3605
252	-49.2893
252.9	-49.2215
253.8	-49.2249
254.7	-49.2249
255.6	-49.2316
256.5	-49.2181
257.4	-49.2859
258.3	-49.3096
259.2	-49.2927
260.1	-49.2011
261	-49.1502
261.9	-49.1774
262.8	-49.2452
263.7	-49.2621
264.6	-49.1401
265.5	-49.1197
266.4	-49.1876
267.3	-49.1909
268.2	-49.1774
269.1	-49.2011
270	-49.2825
270.9	-49.2791
271.8	-49.2316
272.7	-49.1774
273.6	-49.2147
274.5	-49.1774
275.4	-49.1876
276.3	-49.1299
277.2	-49.2486
278.1	-49.2384
279	-49.2282
279.9	-49.1604
280.8	-48.9773
281.7	-48.9095
282.6	-48.9163
283.5	-48.9231
284.4	-48.9061
285.3	-48.8756
286.2	-48.8688
287.1	-48.8451
288	-48.8112
288.9	-48.8078
289.8	-48.9231
290.7	-48.9909
291.6	-49.0146
292.5	-48.9129
293.4	-48.8756
294.3	-48.8112
295.2	-48.7908
296.1	-48.723
297	-48.7467
297.9	-48.7637
298.8	-48.8247
299.7	-48.7569
300.6	-48.6993
301.5	-48.7027
302.4	-48.7637
303.3	-48.7976
304.2	-48.8044
305.1	-48.7908
306	-48.7467
306.9	-48.6552
307.8	-48.5704
308.7	-48.5501
309.6	-48.6111
310.5	-48.6823
311.4	-48.6688
312.3	-48.5908
313.2	-48.5942
314.1	-48.567
315	-48.506
315.9	-48.4958
316.8	-48.5128
317.7	-48.5433
318.6	-48.5467
319.5	-48.4992
320.4	-48.3297
321.3	-48.2991
322.2	-48.2856
323.1	-48.3704
324	-48.4009
324.9	-48.4144
325.8	-48.4009
326.7	-48.3975
327.6	-48.3738
328.5	-48.3534
329.4	-48.4551
330.3	-48.5806
331.2	-48.5569
332.1	-48.5569
333	-48.5094
333.9	-48.523
334.8	-48.4856
335.7	-48.5094
336.6	-48.5196
337.5	-48.6043
338.4	-48.6688
339.3	-48.6484
340.2	-48.5535
341.1	-48.5535
342	-48.567
342.9	-48.5772
343.8	-48.5908
344.7	-48.567
345.6	-48.5535
346.5	-48.6552
347.4	-48.6179
348.3	-48.662
349.2	-48.7196
350.1	-48.8925
351	-48.9163
351.9	-48.9299
352.8	-48.9231
353.7	-48.8925
354.6	-48.8858
355.5	-48.9265
356.4	-48.9027
357.3	-48.9434
358.2	-48.9231
359.1	-48.8417
360	-48.7264
360.9	-48.706
361.8	-48.6518
362.7	-48.7094
363.6	-48.7128
364.5	-48.5942
365.4	-48.5128
366.3	-48.506
367.2	-48.3941
368.1	-48.2856
369	-48.2313
369.9	-48.3771
370.8	-48.4483
371.7	-48.4823
372.6	-48.5772
373.5	-48.6247
374.4	-48.6755
375.3	-48.7332
376.2	-48.7094
377.1	-48.7976
378	-48.8722
378.9	-48.8451
379.8	-48.8552
380.7	-48.8654
381.6	-48.8044
382.5	-48.8349
383.4	-48.8349
384.3	-48.8654
385.2	-48.8044
386.1	-48.7874
387	-48.7739
387.9	-48.7569
388.8	-48.8078
389.7	-48.8756
390.6	-48.9536
391.5	-48.9332
392.4	-48.8586
393.3	-48.7908
394.2	-48.7637
395.1	-48.7332
396	-48.7094
396.9	-48.7467
397.8	-48.7027
398.7	-48.7027
399.6	-48.6213
400.5	-48.5297
401.4	-48.506
402.3	-48.5196
403.2	-48.5467
404.1	-48.523
405	-48.4924
405.9	-48.4416
406.8	-48.3636
407.7	-48.3975
408.6	-48.4178
409.5	-48.4721
410.4	-48.5874
411.3	-48.6349
412.2	-48.5704
413.1	-48.6145
414	-48.6416
414.9	-48.6281
415.8	-48.7128
416.7	-48.7603
417.6	-48.801
418.5	-48.7908
419.4	-48.7874
420.3	-48.7535
421.2	-48.7569
422.1	-48.8383
423	-48.9671
423.9	-49.018
424.8	-49.0485
425.7	-49.0485
426.6	-49.0723
427.5	-49.0791
428.4	-49.0418
429.3	-49.174
430.2	-49.2689
431.1	-49.2316
432	-49.1977
432.9	-49.1265
433.8	-48.9671
434.7	-48.8993
435.6	-48.9841
436.5	-49.0316
437.4	-49.1469
438.3	-49.2113
439.2	-49.1774
440.1	-49.0791
441	-49.0587
441.9	-49.0994
442.8	-49.1638
443.7	-49.252
444.6	-49.3368
445.5	-49.2859
446.4	-49.3605
447.3	-49.2995
448.2	-49.1808
449.1	-49.113
450	-49.1197
450.9	-49.1536
451.8	-49.0892
452.7	-48.9638
453.6	-49.0011
454.5	-49.0519
455.4	-49.1062
456.3	-49.0892
457.2	-49.1367
458.1	-49.174
459	-49.1231
459.9	-49.0384
460.8	-48.9875
461.7	-49.0384
462.6	-49.1062
463.5	-49.1842
464.4	-49.1231
465.3	-49.0824
466.2	-49.0723
467.1	-49.0723
468	-49.0485
468.9	-49.0418
469.8	-49.1163
470.7	-49.2045
471.6	-49.2079
472.5	-49.1299
473.4	-49.0858
474.3	-49.096
475.2	-49.0858
476.1	-49.0926
477	-49.1401
477.9	-49.2282
478.8	-49.2418
479.7	-49.2825
480.6	-49.2927
481.5	-49.252
482.4	-49.2655
483.3	-49.2995
484.2	-49.2995
485.1	-49.3266
486	-49.3368
486.9	-49.3401
487.8	-49.313
488.7	-49.2791
489.6	-49.3571
490.5	-49.3842
491.4	-49.4317
492.3	-49.3944
493.2	-49.3944
494.1	-49.4249
495	-49.3876
495.9	-49.4046
496.8	-49.4656
497.7	-49.408
498.6	-49.3673
499.5	-49.3164
500.4	-49.2588
501.3	-49.2588
502.2	-49.3401
503.1	-49.4317
504	-49.4826
504.9	-49.469
505.8	-49.4487
506.7	-49.4792
507.6	-49.4215
508.5	-49.3707
509.4	-49.4147
510.3	-49.5165
511.2	-49.6216
512.1	-49.6046
513	-49.6826
513.9	-49.7606
514.8	-49.6962
515.7	-49.7538
516.6	-49.7301
517.5	-49.7199
518.4	-49.6894
519.3	-49.608
520.2	-49.5029
521.1	-49.4419
522	-49.4215
522.9	-49.4283
523.8	-49.374
524.7	-49.2825
525.6	-49.1469
526.5	-49.0858
527.4	-48.9231
528.3	-48.7773
529.2	-48.8552
530.1	-49.0044
531	-48.9231
531.9	-48.8688
532.8	-48.8654
533.7	-48.8925
534.6	-48.9163
535.5	-48.9638
536.4	-48.9129
537.3	-48.9841
538.2	-49.0553
539.1	-49.0044
540	-48.9027
540.9	-48.8281
541.8	-48.8993
542.7	-48.9671
543.6	-49.018
544.5	-48.9468
545.4	-48.862
546.3	-48.9197
547.2	-48.7671
548.1	-48.6213
549	-48.6281
549.9	-48.7739
550.8	-48.8858
551.7	-48.8925
552.6	-48.9671
553.5	-48.9773
554.4	-48.9502
555.3	-49.0044
556.2	-48.9366
557.1	-49.0655
558	-49.1808
558.9	-49.2486
559.8	-49.1977
560.7	-49.2655
561.6	-49.2859
562.5	-49.3096
563.4	-49.4351
564.3	-49.5063
565.2	-49.4283
566.1	-49.4588
567	-49.408
567.9	-49.3707
568.8	-49.3164
569.7	-49.313
570.6	-49.3266
571.5	-49.313
572.4	-49.2486
573.3	-49.1943
574.2	-49.1977
575.1	-49.1977
576	-49.1943
576.9	-49.1774
577.8	-49.2113
578.7	-49.1943
579.6	-49.1808
580.5	-49.1028
581.4	-49.0316
582.3	-49.0282
583.2	-49.0587
584.1	-49.0485
585	-48.9604
585.9	-48.9265
586.8	-48.8993
587.7	-48.8756
588.6	-48.9299
589.5	-48.9773
590.4	-49.0689
591.3	-49.0316
592.2	-49.0418
593.1	-49.018
594	-49.035
594.9	-49.0248
595.8	-49.1299
596.7	-49.2045
597.6	-49.1842
598.5	-49.174
599.4	-49.1469
600.3	-49.0926
601.2	-49.1096
602.1	-49.1062
603	-49.1435
603.9	-49.1638
604.8	-49.1774
605.7	-49.1435
606.6	-49.1299
607.5	-49.0994
608.4	-49.0723
609.3	-49.1265
610.2	-49.2113
611.1	-49.2825
612	-49.2859
612.9	-49.3571
613.8	-49.4147
614.7	-49.3639
615.6	-49.4283
616.5	-49.4113
617.4	-49.4792
618.3	-49.486
619.2	-49.4351
620.1	-49.3537
621	-49.3266
621.9	-49.3707
622.8	-49.4419
623.7	-49.4927
624.6	-49.5605
625.5	-49.5063
626.4	-49.5639
627.3	-49.486
628.2	-49.4385
629.1	-49.4317
630	-49.5639
630.9	-49.5775
631.8	-49.5639
632.7	-49.5707
633.6	-49.5131
634.5	-49.5707
635.4	-49.608
636.3	-49.5165
637.2	-49.5775
638.1	-49.5775
639	-49.4961
639.9	-49.408
640.8	-49.3774
641.7	-49.3673
642.6	-49.3842
643.5	-49.3503
644.4	-49.4046
645.3	-49.3198
646.2	-49.3944
647.1	-49.313
648	-49.2249
648.9	-49.2655
649.8	-49.2825
650.7	-49.2418
651.6	-49.2554
652.5	-49.2588
653.4	-49.2961
654.3	-49.3164
655.2	-49.4215
656.1	-49.4113
657	-49.4792
657.9	-49.4758
658.8	-49.4215
659.7	-49.2995
660.6	-49.2689
661.5	-49.2927
662.4	-49.3605
663.3	-49.4181
664.2	-49.4046
665.1	-49.3808
666	-49.3605
666.9	-49.3707
667.8	-49.3639
668.7	-49.3978
669.6	-49.4249
670.5	-49.4317
671.4	-49.4656
672.3	-49.3368
673.2	-49.2723
674.1	-49.2588
675	-49.2045
675.9	-49.2215
676.8	-49.2418
677.7	-49.2621
678.6	-49.252
679.5	-49.2282
680.4	-49.1977
681.3	-49.1435
682.2	-49.174
683.1	-49.2418
684	-49.1876
684.9	-49.1876
685.8	-49.096
686.7	-49.0553
687.6	-49.0384
688.5	-49.0485
689.4	-49.1231
690.3	-49.2113
691.2	-49.1977
692.1	-49.1502
693	-49.157
693.9	-49.2147
694.8	-49.2113
695.7	-49.2757
696.6	-49.3639
697.5	-49.3368
698.4	-49.3537
699.3	-49.3198
700.2	-49.2757
701.1	-49.2181
702	-49.2554
702.9	-49.2249
703.8	-49.1842
704.7	-49.1435
705.6	-49.0791
706.5	-49.0689
707.4	-49.0757
708.3	-49.1231
709.2	-49.1977
710.1	-49.33
711	-49.4215
711.9	-49.3774
712.8	-49.4012
713.7	-49.4012
714.6	-49.3842
715.5	-49.452
716.4	-49.4385
717.3	-49.5538
718.2	-49.5538
719.1	-49.4656
720	-49.408
720.9	-49.3707
721.8	-49.4249
722.7	-49.486
723.6	-49.547
724.5	-49.5538
725.4	-49.5843
726.3	-49.5979
727.2	-49.53
728.1	-49.5029
729	-49.5334
729.9	-49.6928
730.8	-49.7504
731.7	-49.6996
732.6	-49.6962
733.5	-49.703
734.4	-49.6996
735.3	-49.7233
736.2	-49.669
737.1	-49.7538
738	-49.8081
738.9	-49.8216
739.8	-49.7606
740.7	-49.7538
741.6	-49.7877
742.5	-49.8284
743.4	-49.8352
744.3	-49.8488
745.2	-49.7877
746.1	-49.7945
747	-49.7572
747.9	-49.6623
748.8	-49.6623
749.7	-49.7403
750.6	-49.8318
751.5	-49.8352
752.4	-49.7911
753.3	-49.8182
754.2	-49.7979
755.1	-49.8352
756	-49.8352
756.9	-49.8284
757.8	-49.8793
758.7	-49.8182
759.6	-49.7233
760.5	-49.6521
761.4	-49.5979
762.3	-49.5877
763.2	-49.6758
764.1	-49.6758
765	-49.5741
765.9	-49.5097
766.8	-49.5097
767.7	-49.5097
768.6	-49.5232
769.5	-49.6046
770.4	-49.6724
771.3	-49.6589
772.2	-49.5605
773.1	-49.5266
774	-49.4453
774.9	-49.4588
775.8	-49.4893
776.7	-49.5436
777.6	-49.5436
778.5	-49.5165
779.4	-49.5097
780.3	-49.53
781.2	-49.4893
782.1	-49.5402
783	-49.5402
783.9	-49.6012
784.8	-49.6521
785.7	-49.6284
786.6	-49.6453
787.5	-49.6385
788.4	-49.6996
789.3	-49.7708
790.2	-49.8488
791.1	-49.8929
792	-49.8827
792.9	-49.8284
793.8	-49.8318
794.7	-49.8352
795.6	-49.8657
796.5	-49.9335
797.4	-50.0081
798.3	-49.9098
799.2	-49.8522
800.1	-49.8386
801	-49.8522
801.9	-49.8488
802.8	-49.8827
803.7	-49.8759
804.6	-49.8284
805.5	-49.7233
806.4	-49.7674
807.3	-49.7877
808.2	-49.8182
809.1	-49.8522
810	-49.9234
810.9	-49.9301
811.8	-49.92
812.7	-49.9098
813.6	-49.998
814.5	-49.9878
815.4	-50.0285
816.3	-50.0285
817.2	-50.0929
818.1	-50.1302
819	-50.1065
819.9	-50.0861
820.8	-50.0692
821.7	-50.1709
822.6	-50.2455
823.5	-50.2523
824.4	-50.2421
825.3	-50.154
826.2	-50.1438
827.1	-50.0963
828	-50.0624
828.9	-50.0454
829.8	-50.0997
830.7	-50.1099
831.6	-50.0353
832.5	-49.9776
833.4	-49.9878
834.3	-49.9844
835.2	-50.0251
836.1	-49.9437
837	-49.9946
837.9	-49.9742
838.8	-49.9234
839.7	-49.8047
840.6	-49.7606
841.5	-49.7369
842.4	-49.7504
843.3	-49.7131
844.2	-49.7199
845.1	-49.6928
846	-49.7572
846.9	-49.7301
847.8	-49.6114
848.7	-49.5877
849.6	-49.7064
850.5	-49.7369
851.4	-49.7233
852.3	-49.6758
853.2	-49.6758
854.1	-49.6385
855	-49.625
855.9	-49.6046
856.8	-49.5707
857.7	-49.6216
858.6	-49.5605
859.5	-49.4113
860.4	-49.3673
861.3	-49.3876
862.2	-49.4893
863.1	-49.5199
864	-49.5843
864.9	-49.53
865.8	-49.5809
866.7	-49.5605
867.6	-49.5639
868.5	-49.5572
869.4	-49.6284
870.3	-49.6826
871.2	-49.6352
872.1	-49.6216
873	-49.5911
873.9	-49.4893
874.8	-49.4588
875.7	-49.469
876.6	-49.4724
877.5	-49.5266
878.4	-49.4927
879.3	-49.4046
880.2	-49.4385
881.1	-49.4283
882	-49.4181
882.9	-49.4113
883.8	-49.4453
884.7	-49.4622
885.6	-49.4385
886.5	-49.3842
887.4	-49.3469
888.3	-49.3198
889.2	-49.3707
890.1	-49.408
891	-49.4181
891.9	-49.4181
892.8	-49.391
893.7	-49.4453
894.6	-49.3944
895.5	-49.391
896.4	-49.4351
897.3	-49.486
898.2	-49.3571
899.1	-49.2859
900	-49.2215
900.9	-49.2316
901.8	-49.1876
902.7	-49.2011
903.6	-49.1638
904.5	-49.1672
905.4	-49.1096
906.3	-49.0994
907.2	-49.1062
908.1	-49.0757
909	-49.157
909.9	-49.2689
910.8	-49.3232
911.7	-49.2859
912.6	-49.2554
913.5	-49.3876
914.4	-49.3707
915.3	-49.374
916.2	-49.3537
917.1	-49.3808
918	-49.4283
918.9	-49.3707
919.8	-49.3096
920.7	-49.3232
921.6	-49.3571
922.5	-49.3944
923.4	-49.374
924.3	-49.3707
925.2	-49.3639
926.1	-49.2961
927	-49.1706
927.9	-49.1096
928.8	-49.0791
929.7	-49.2147
930.6	-49.2927
931.5	-49.2181
932.4	-49.1909
933.3	-49.2249
934.2	-49.2147
935.1	-49.3334
936	-49.3503
936.9	-49.4656
937.8	-49.5063
938.7	-49.5165
939.6	-49.4554
940.5	-49.4487
941.4	-49.5097
942.3	-49.5334
943.2	-49.5266
944.1	-49.5063
945	-49.4249
945.9	-49.4927
946.8	-49.3876
947.7	-49.2859
948.6	-49.2554
949.5	-49.3164
950.4	-49.3368
951.3	-49.2655
952.2	-49.2045
953.1	-49.1842
954	-49.1062
954.9	-49.113
955.8	-49.0655
956.7	-49.1502
957.6	-49.2486
958.5	-49.2757
959.4	-49.2249
960.3	-49.2045
961.2	-49.2384
962.1	-49.2689
963	-49.3198
963.9	-49.3944
964.8	-49.2655
965.7	-49.2961
966.6	-49.2452
967.5	-49.2181
968.4	-49.2621
969.3	-49.3435
970.2	-49.3978
971.1	-49.3334
972	-49.2927
972.9	-49.3198
973.8	-49.3096
974.7	-49.3707
975.6	-49.3334
976.5	-49.4113
977.4	-49.4622
978.3	-49.4588
979.2	-49.3808
980.1	-49.2961
981	-49.2893
981.9	-49.2757
982.8	-49.2689
983.7	-49.3028
984.6	-49.2655
985.5	-49.2995
986.4	-49.2621
987.3	-49.2554
988.2	-49.2995
989.1	-49.4283
990	-49.4995
990.9	-49.4792
991.8	-49.4181
992.7	-49.3944
993.6	-49.2927
994.5	-49.2554
995.4	-49.1909
996.3	-49.2215
997.2	-49.2689
998.1	-49.2113
999	-49.1333
999.9	-49.0655
1000.8	-49.0723
1001.7	-49.0621
1002.6	-49.0791
1003.5	-49.157
1004.4	-49.1265
1005.3	-49.1706
1006.2	-49.1469
1007.1	-49.113
1008	-49.1197
1008.9	-49.1909
1009.8	-49.2554
1010.7	-49.2621
1011.6	-49.2927
1012.5	-49.2689
1013.4	-49.3876
1014.3	-49.4487
1015.2	-49.5029
1016.1	-49.5741
1017	-49.6453
1017.9	-49.6996
1018.8	-49.6521
1019.7	-49.608
1020.6	-49.6148
1021.5	-49.6148
1022.4	-49.6758
1023.3	-49.7335
1024.2	-49.7403
1025.1	-49.7165
1026	-49.6623
1026.9	-49.6657
1027.8	-49.6792
1028.7	-49.7369
1029.6	-49.9166
1030.5	-49.9844
1031.4	-49.9335
1032.3	-49.8827
1033.2	-49.8556
1034.1	-49.9234
1035	-49.9607
1035.9	-49.998
1036.8	-49.998
1037.7	-50.0285
1038.6	-49.9607
1039.5	-49.8861
1040.4	-49.9166
1041.3	-49.9335
1042.2	-49.9573
1043.1	-49.9573
1044	-49.9742
1044.9	-49.9234
1045.8	-49.8929
1046.7	-49.8861
1047.6	-49.8047
1048.5	-49.7437
1049.4	-49.825
1050.3	-49.8657
1051.2	-49.8556
1052.1	-49.7538
1053	-49.6385
1053.9	-49.5911
1054.8	-49.5911
1055.7	-49.547
1056.6	-49.5809
1057.5	-49.6114
1058.4	-49.5775
1059.3	-49.452
1060.2	-49.3673
1061.1	-49.374
1062	-49.3096
1062.9	-49.33
1063.8	-49.3978
1064.7	-49.3673
1065.6	-49.3435
1066.5	-49.3028
1067.4	-49.3266
1068.3	-49.3707
1069.2	-49.4656
1070.1	-49.5775
1071	-49.608
1071.9	-49.5673
1072.8	-49.6012
1073.7	-49.5639
1074.6	-49.6284
1075.5	-49.6216
1076.4	-49.6114
1077.3	-49.625
1078.2	-49.6487
1079.1	-49.547
1080	-49.5538
1080.9	-49.5199
1081.8	-49.4588
1082.7	-49.4487
1083.6	-49.5436
1084.5	-49.5029
1085.4	-49.5029
1086.3	-49.5029
1087.2	-49.4487
1088.1	-49.4758
1089	-49.5605
1089.9	-49.6385
1090.8	-49.6419
1091.7	-49.669
1092.6	-49.6284
1093.5	-49.6318
1094.4	-49.6758
1095.3	-49.6724
1096.2	-49.7165
1097.1	-49.8488
1098	-49.7911
1098.9	-49.7572
1099.8	-49.7165
1100.7	-49.6385
1101.6	-49.6894
1102.5	-49.6996
1103.4	-49.6623
1104.3	-49.608
1105.2	-49.6589
1106.1	-49.5572
1107	-49.5639
1107.9	-49.5605
1108.8	-49.6385
1109.7	-49.7437
1110.6	-49.8895
1111.5	-49.8827
1112.4	-49.8182
1113.3	-49.92
1114.2	-49.9403
1115.1	-49.9335
1116	-50.0149
1116.9	-50.0149
1117.8	-50.0217
1118.7	-49.9844
1119.6	-49.9539
1120.5	-49.9708
1121.4	-49.9844
1122.3	-50.0793
1123.2	-50.0556
1124.1	-50.0624
1125	-50.0386
1125.9	-49.9607
1126.8	-49.9844
1127.7	-49.9471
1128.6	-49.9607
1129.5	-50.0081
1130.4	-50.1031
1131.3	-50.0217
1132.2	-49.9641
1133.1	-49.9234
1134	-49.9064
1134.9	-49.9369
1135.8	-50.0251
1136.7	-49.981
1137.6	-49.9674
1138.5	-49.9776
1139.4	-49.8929
1140.3	-49.8149
1141.2	-49.8115
1142.1	-49.8556
1143	-49.9098
1143.9	-49.8929
1144.8	-49.8962
1145.7	-49.8047
1146.6	-49.842
1147.5	-49.8454
1148.4	-49.8115
1149.3	-49.903
1150.2	-50.0149
1151.1	-49.9403
1152	-49.9064
1152.9	-49.842
1153.8	-49.842
1154.7	-49.7809
1155.6	-49.7911
1156.5	-49.842
1157.4	-49.8793
1158.3	-49.8556
1159.2	-49.7708
1160.1	-49.6996
1161	-49.747
1161.9	-49.7843
1162.8	-49.8556
1163.7	-49.9539
1164.6	-49.9064
1165.5	-49.903
1166.4	-49.8793
1167.3	-49.842
1168.2	-49.7945
1169.1	-49.8827
1170	-50.0251
1170.9	-50.059
1171.8	-50.0488
1172.7	-50.0285
1173.6	-50.0115
1174.5	-50.0183
1175.4	-49.9742
1176.3	-49.9607
1177.2	-50.0488
1178.1	-50.059
1179	-49.9912
1179.9	-49.9268
1180.8	-49.8759
1181.7	-49.8691
1182.6	-49.8623
1183.5	-49.8861
1184.4	-49.8827
1185.3	-49.8895
1186.2	-49.903
1187.1	-49.8182
1188	-49.7911
1188.9	-49.8182
1189.8	-49.8827
1190.7	-49.8962
1191.6	-49.8827
1192.5	-49.8962
1193.4	-49.8556
1194.3	-49.9098
1195.2	-49.9234
1196.1	-49.9437
1197	-50.0658
1197.9	-50.0488
1198.8	-49.9132
1199.7	-49.8454
1200.6	-49.8386
1201.5	-49.9166
1202.4	-49.9539
1203.3	-49.9776
1204.2	-49.9844
1205.1	-50.0285
1206	-50.0556
1206.9	-50.0793
1207.8	-50.1268
1208.7	-50.2557
1209.6	-50.3676
1210.5	-50.4388
1211.4	-50.4659
1212.3	-50.4795
1213.2	-50.5642
1214.1	-50.632
1215	-50.5303
1215.9	-50.5846
1216.8	-50.5812
1217.7	-50.632
1218.6	-50.6524
1219.5	-50.5981
1220.4	-50.51
1221.3	-50.4693
1222.2	-50.4761
1223.1	-50.4761
1224	-50.4591
1224.9	-50.449
1225.8	-50.3845
1226.7	-50.4218
1227.6	-50.3506
1228.5	-50.3642
1229.4	-50.3777
1230.3	-50.5168
1231.2	-50.4354
1232.1	-50.4015
1233	-50.354
1233.9	-50.3574
1234.8	-50.354
1235.7	-50.415
1236.6	-50.4286
1237.5	-50.4422
1238.4	-50.3777
1239.3	-50.293
1240.2	-50.1878
1241.1	-50.2082
1242	-50.2625
1242.9	-50.154
1243.8	-50.154
1244.7	-50.1946
1245.6	-50.0759
1246.5	-50.1234
1247.4	-50.1438
1248.3	-50.0827
1249.2	-50.1573
1250.1	-50.1878
1251	-50.1811
1251.9	-50.1743
1252.8	-50.0759
1253.7	-50.0861
1254.6	-50.12
1255.5	-50.1878
1256.4	-50.1878
1257.3	-50.2251
1258.2	-50.215
1259.1	-50.1031
1260	-50.0251
1260.9	-50.0556
1261.8	-50.1133
1262.7	-50.1099
1263.6	-50.1675
1264.5	-50.1065
1265.4	-50.1133
1266.3	-50.1336
1267.2	-50.1268
1268.1	-50.1031
1269	-50.2014
1269.9	-50.2625
1270.8	-50.3099
1271.7	-50.337
1272.6	-50.3031
1273.5	-50.2862
1274.4	-50.3031
1275.3	-50.337
1276.2	-50.3642
1277.1	-50.354
1278	-50.3676
1278.9	-50.2862
1279.8	-50.2625
1280.7	-50.293
1281.6	-50.2218
1282.5	-50.2116
1283.4	-50.2319
1284.3	-50.198
1285.2	-50.1641
1286.1	-50.1506
1287	-50.0793
1287.9	-50.0726
1288.8	-50.1336
1289.7	-50.1641
1290.6	-50.1777
1291.5	-50.1845
1292.4	-50.1777
1293.3	-50.1878
1294.2	-50.2862
1295.1	-50.276
1296	-50.3065
1296.9	-50.4049
1297.8	-50.4388
1298.7	-50.3879
1299.6	-50.3303
1300.5	-50.3404
1301.4	-50.3099
1302.3	-50.3303
1303.2	-50.3235
1304.1	-50.2794
1305	-50.2557
1305.9	-50.2421
1306.8	-50.2557
1307.7	-50.2285
1308.6	-50.3065
1309.5	-50.3337
1310.4	-50.3337
1311.3	-50.3438
1312.2	-50.2896
1313.1	-50.2998
1314	-50.3608
1314.9	-50.293
1315.8	-50.3303
1316.7	-50.2828
1317.6	-50.3337
1318.5	-50.3099
1319.4	-50.1777
1320.3	-50.1709
1321.2	-50.198
1322.1	-50.2387
1323	-50.293
1323.9	-50.2455
1324.8	-50.2862
1325.7	-50.1845
1326.6	-50.2421
1327.5	-50.2014
1328.4	-50.2218
1329.3	-50.2625
1330.2	-50.3642
1331.1	-50.3608
1332	-50.293
1332.9	-50.2726
1333.8	-50.276
1334.7	-50.2794
1335.6	-50.3608
1336.5	-50.3506
1337.4	-50.4083
1338.3	-50.4049
1339.2	-50.3303
1340.1	-50.2794
1341	-50.3099
1341.9	-50.3133
1342.8	-50.3506
1343.7	-50.337
1344.6	-50.2964
1345.5	-50.2625
1346.4	-50.2421
1347.3	-50.2489
1348.2	-50.1743
1349.1	-50.2014
1350	-50.2116
1350.9	-50.2218
1351.8	-50.198
1352.7	-50.1878
1353.6	-50.1607
1354.5	-50.2285
1355.4	-50.2455
1356.3	-50.2726
1357.2	-50.3743
1358.1	-50.3506
1359	-50.2998
1359.9	-50.215
1360.8	-50.2048
1361.7	-50.2387
1362.6	-50.2557
1363.5	-50.3404
1364.4	-50.3167
1365.3	-50.3574
1366.2	-50.3337
1367.1	-50.2828
1368	-50.3065
1368.9	-50.4218
1369.8	-50.4896
1370.7	-50.5168
1371.6	-50.4896
1372.5	-50.4659
1373.4	-50.4015
1374.3	-50.3743
1375.2	-50.2625
1376.1	-50.2353
1377	-50.2692
1377.9	-50.3065
1378.8	-50.276
1379.7	-50.2591
1380.6	-50.2082
1381.5	-50.0963
1382.4	-50.0658
1383.3	-50.0014
1384.2	-49.981
1385.1	-49.998
1386	-49.9946
1386.9	-49.9844
1387.8	-49.9539
1388.7	-50.0014
1389.6	-50.0624
1390.5	-50.0793
1391.4	-50.0759
1392.3	-50.0726
1393.2	-50.0759
1394.1	-50.1234
1395	-50.1065
1395.9	-50.1302
1396.8	-50.2251
1397.7	-50.2862
1398.6	-50.1946
1399.5	-50.0963
1400.4	-50.1065
1401.3	-50.1336
1402.2	-50.1777
1403.1	-50.198
1404	-50.1641
1404.9	-50.1438
1405.8	-50.0488
1406.7	-50.0048
1407.6	-49.9539
1408.5	-49.9708
1409.4	-50.0929
1410.3	-50.1099
1411.2	-50.0827
1412.1	-50.0522
1413	-50.0556
1413.9	-50.1166
1414.8	-50.0726
1415.7	-50.1031
1416.6	-50.1099
1417.5	-50.1641
1418.4	-50.1641
1419.3	-50.1099
1420.2	-50.0285
1421.1	-50.059
1422	-50.059
1422.9	-50.0692
1423.8	-50.0726
1424.7	-50.0556
1425.6	-50.0251
1426.5	-49.9674
1427.4	-49.9268
1428.3	-49.9234
1429.2	-49.9268
1430.1	-50.0081
1431	-50.059
1431.9	-49.981
1432.8	-50.0014
1433.7	-50.0183
1434.6	-50.0726
1435.5	-50.059
1436.4	-50.1573
1437.3	-50.2116
1438.2	-50.2726
1439.1	-50.2421
1440	-50.2387
1440.9	-50.2964
1441.8	-50.3404
1442.7	-50.4015
1443.6	-50.3845
1444.5	-50.3777
1445.4	-50.3845
1446.3	-50.3845
1447.2	-50.4591
1448.1	-50.4286
1449	-50.4896
1449.9	-50.5642
1450.8	-50.5846
1451.7	-50.4659
1452.6	-50.3777
1453.5	-50.337
1454.4	-50.354
1455.3	-50.2218
1456.2	-50.1743
1457.1	-50.1336
1458	-50.0658
1458.9	-49.9912
1459.8	-49.9335
1460.7	-49.9369
1461.6	-50.0217
1462.5	-50.0014
1463.4	-50.0421
1464.3	-49.9505
1465.2	-49.8827
1466.1	-49.8149
1467	-49.703
1467.9	-49.6385
1468.8	-49.6216
1469.7	-49.6046
1470.6	-49.5436
1471.5	-49.5368
1472.4	-49.547
1473.3	-49.5063
1474.2	-49.5775
1475.1	-49.5097
1476	-49.5402
1476.9	-49.6114
1477.8	-49.6589
1478.7	-49.6182
1479.6	-49.5979
1480.5	-49.6487
1481.4	-49.6555
1482.3	-49.6385
1483.2	-49.6284
1484.1	-49.5741
1485	-49.5877
1485.9	-49.5673
1486.8	-49.547
1487.7	-49.5402
1488.6	-49.6352
1489.5	-49.6928
1490.4	-49.6826
1491.3	-49.6928
1492.2	-49.6385
1493.1	-49.5605
1494	-49.608
1494.9	-49.5911
1495.8	-49.5945
1496.7	-49.5809
1497.6	-49.5979
1498.5	-49.3978
1499.4	-49.3062
1500.3	-49.2418
1501.2	-49.1808
1502.1	-49.1638
1503	-49.1808
1503.9	-49.1808
1504.8	-49.1367
1505.7	-49.0926
1506.6	-49.0892
1507.5	-49.096
1508.4	-49.1604
1509.3	-49.1808
1510.2	-49.1469
1511.1	-49.1909
1512	-49.1977
1512.9	-49.2011
1513.8	-49.2418
1514.7	-49.2181
1515.6	-49.2079
1516.5	-49.2486
1517.4	-49.2689
1518.3	-49.2689
1519.2	-49.1367
1520.1	-49.1197
1521	-49.1706
1521.9	-49.1808
1522.8	-49.1876
1523.7	-49.2554
1524.6	-49.2147
1525.5	-49.2689
1526.4	-49.2418
1527.3	-49.235
1528.2	-49.2418
1529.1	-49.2791
1530	-49.374
1530.9	-49.4046
1531.8	-49.3435
1532.7	-49.3164
1533.6	-49.3028
1534.5	-49.2995
1535.4	-49.2588
1536.3	-49.3639
1537.2	-49.4588
1538.1	-49.469
1539	-49.3774
1539.9	-49.3062
1540.8	-49.3096
1541.7	-49.3028
1542.6	-49.2621
1543.5	-49.3198
1544.4	-49.3062
1545.3	-49.4147
1546.2	-49.4012
1547.1	-49.408
1548	-49.4588
1548.9	-49.5097
1549.8	-49.6148
1550.7	-49.608
1551.6	-49.5911
1552.5	-49.5843
1553.4	-49.5707
1554.3	-49.6012
1555.2	-49.5402
1556.1	-49.5673
1557	-49.6555
1557.9	-49.6657
1558.8	-49.6385
1559.7	-49.5639
1560.6	-49.5775
1561.5	-49.6114
1562.4	-49.6962
1563.3	-49.8149
1564.2	-49.9437
1565.1	-49.9912
1566	-49.981
1566.9	-49.9912
1567.8	-49.998
1568.7	-50.1133
1569.6	-50.1811
1570.5	-50.2218
1571.4	-50.1743
1572.3	-50.1811
1573.2	-50.1675
1574.1	-50.1607
1575	-50.1506
1575.9	-50.2116
1576.8	-50.1946
1577.7	-50.1946
1578.6	-50.1336
1579.5	-50.0522
1580.4	-50.0759
1581.3	-50.0285
1582.2	-50.0488
1583.1	-50.0048
1584	-49.9708
1584.9	-49.998
1585.8	-49.8929
1586.7	-49.8657
1587.6	-49.8759
1588.5	-49.8386
1589.4	-49.8759
1590.3	-49.8657
1591.2	-49.8488
1592.1	-49.764
1593	-49.7369
1593.9	-49.7369
1594.8	-49.7708
1595.7	-49.8284
1596.6	-49.8691
1597.5	-49.9674
1598.4	-49.8522
1599.3	-49.8182
1600.2	-49.8182
1601.1	-49.8318
1602	-49.8318
1602.9	-49.8284
1603.8	-49.842
1604.7	-49.8454
1605.6	-49.7945
1606.5	-49.8047
1607.4	-49.7674
1608.3	-49.7606
1609.2	-49.8149
1610.1	-49.7877
1611	-49.7945
1611.9	-49.7911
1612.8	-49.7369
1613.7	-49.8013
1614.6	-49.7776
1615.5	-49.7538
1616.4	-49.7606
1617.3	-49.8318
1618.2	-49.8047
1619.1	-49.7064
1620	-49.6962
1620.9	-49.7165
1621.8	-49.7606
1622.7	-49.8013
1623.6	-49.7267
1624.5	-49.6758
1625.4	-49.703
1626.3	-49.7267
1627.2	-49.6928
1628.1	-49.7301
1629	-49.8115
1629.9	-49.8657
1630.8	-49.903
1631.7	-49.8725
1632.6	-49.842
1633.5	-49.8047
1634.4	-49.8589
1635.3	-49.7742
1636.2	-49.8115
1637.1	-49.7742
1638	-49.7131
1638.9	-49.5809
1639.8	-49.4724
1640.7	-49.4215
1641.6	-49.5368
1642.5	-49.5639
1643.4	-49.6758
1644.3	-49.6792
1645.2	-49.7674
1646.1	-49.6826
1647	-49.703
1647.9	-49.6928
1648.8	-49.7776
1649.7	-49.8895
1650.6	-49.8827
1651.5	-49.8352
1652.4	-49.7945
1653.3	-49.7267
1654.2	-49.7674
1655.1	-49.7437
1656	-49.8182
1656.9	-49.9335
1657.8	-49.9234
1658.7	-49.7809
1659.6	-49.6996
1660.5	-49.747
1661.4	-49.7776
1662.3	-49.7776
1663.2	-49.8318
1664.1	-49.8827
1665	-49.8352
1665.9	-49.8216
1666.8	-49.8216
1667.7	-49.8318
1668.6	-49.8589
1669.5	-49.9132
1670.4	-49.9573
1671.3	-49.9234
1672.2	-49.8793
1673.1	-49.8861
1674	-49.8929
1674.9	-49.9301
1675.8	-50.0421
1676.7	-50.12
1677.6	-50.1777
1678.5	-50.1404
1679.4	-50.0421
1680.3	-50.1031
1681.2	-50.1302
1682.1	-50.1065
1683	-50.0861
1683.9	-50.0793
1684.8	-50.0353
1685.7	-49.9742
1686.6	-49.8691
1687.5	-49.7742
1688.4	-49.7335
1689.3	-49.7979
1690.2	-49.7979
1691.1	-49.7572
1692	-49.703
1692.9	-49.7199
1693.8	-49.703
1694.7	-49.6996
1695.6	-49.7301
1696.5	-49.6962
1697.4	-49.7674
1698.3	-49.7165
1699.2	-49.6012
1700.1	-49.6012
1701	-49.7199
1701.9	-49.7437
1702.8	-49.7267
1703.7	-49.6962
1704.6	-49.6792
1705.5	-49.5843
1706.4	-49.5979
1707.3	-49.547
1708.2	-49.5165
1709.1	-49.5232
1710	-49.5809
1710.9	-49.5639
1711.8	-49.5945
1712.7	-49.5809
1713.6	-49.6148
1714.5	-49.6521
1715.4	-49.6589
1716.3	-49.6555
1717.2	-49.6419
1718.1	-49.5979
1719	-49.5572
1719.9	-49.5572
1720.8	-49.6385
1721.7	-49.7369
1722.6	-49.8081
1723.5	-49.8556
1724.4	-49.8488
1725.3	-49.8996
1726.2	-49.8386
1727.1	-49.8488
1728	-49.9335
1728.9	-49.9607
1729.8	-50.0353
1730.7	-50.1065
1731.6	-50.0217
1732.5	-49.9946
1733.4	-49.998
1734.3	-50.0624
1735.2	-50.0081
1736.1	-50.0353
1737	-50.0454
1737.9	-50.0488
1738.8	-49.9369
1739.7	-49.8623
1740.6	-49.8454
1741.5	-49.9064
1742.4	-49.9132
1743.3	-49.8454
1744.2	-49.7843
1745.1	-49.8013
1746	-49.7369
1746.9	-49.7572
1747.8	-49.8081
1748.7	-49.8522
1749.6	-49.8996
1750.5	-49.9437
1751.4	-50.0217
1752.3	-49.9878
1753.2	-49.9946
1754.1	-50.0353
1755	-50.0454
1755.9	-50.0793
1756.8	-50.12
1757.7	-50.0963
1758.6	-49.9844
1759.5	-49.8657
1760.4	-49.842
1761.3	-49.8386
1762.2	-49.8793
1763.1	-49.8725
1764	-49.8827
1764.9	-49.8318
1765.8	-49.7911
1766.7	-49.7911
1767.6	-49.7708
1768.5	-49.8284
1769.4	-49.8929
1770.3	-49.9268
1771.2	-49.8929
1772.1	-49.8725
1773	-49.8657
1773.9	-49.903
1774.8	-49.8522
1775.7	-49.825
1776.6	-49.8013
1777.5	-49.8488
1778.4	-49.7674
1779.3	-49.6216
1780.2	-49.6589
1781.1	-49.6894
1782	-49.7064
1782.9	-49.7301
1783.8	-49.7097
1784.7	-49.7131
1785.6	-49.6521
1786.5	-49.6555
1787.4	-49.6114
1788.3	-49.6928
1789.2	-49.8149
1790.1	-49.8115
1791	-49.8759
1791.9	-49.8386
1792.8	-49.8488
1793.7	-49.8895
1794.6	-49.903
1795.5	-49.9301
1796.4	-49.8793
1797.3	-49.9539
1798.2	-49.8488
1799.1	-49.7131
[truncated: 932,743+ more rows]

## Sheet: sFigure 4 C ii
TTX/ACSF	Low K+/ACSF	TTX/ACSF
-53.12	-64.49	-49.59
-50.08	-61.5	-52.48
-49.15	-66.41	-58.05
-50.67	-75.18	-62.15
-45.15	-53.44	-48.72
-48.03	-60.09	-50.66
-49.93	-59.54	-48.8
