# Supplementary material for: The cation channel mechanisms of subthreshold inward depolarizing currents in the mice VTA dopaminergic neurons and their roles in the chronic-stress-induced depression-like behavior
Source: eLife. 2024 Dec 6;12:RP88319. doi: 10.7554/eLife.88319 (PMC11623934; doi:10.7554/eLife.88319)
Supplement: Figure 2—figure supplement 4—source data 4. [file elife-88319-fig2-figsupp4-data4.xlsx]

## Sheet: D i
Time (min)	Firing rate (Hz)
0.47	1.2766
0.94	1.31206
1.41	1.24113
1.88	1.2766
2.35	1.2766
2.82	1.2766
3.29	1.31206
3.76	1.34752
4.23	1.2766
4.7	1.2766
5.17	1.34752
5.64	1.2766
6.11	1.20567
6.58	1.2766
7.05	1.2766
7.52	1.24113
7.99	1.20567
8.46	1.20567
8.93	1.20567
9.4	1.20567
9.87	1.20567
10.34	1.17021
10.81	1.17021
11.28	1.09929
11.75	1.13475
12.22	1.06383
12.69	1.13475
13.16	1.17021
13.63	1.17021
14.1	1.24113
14.57	1.2766
15.04	1.59574
15.51	1.4539
15.98	1.41844
16.45	1.59574
16.92	1.41844
17.39	1.48936
17.86	1.63121
18.33	1.73759
18.8	2.34043
19.27	2.19858
19.74	2.41135
20.21	2.7305
20.68	2.83688
21.15	2.9078
21.62	3.19149
22.09	3.08511
22.56	3.08511
23.03	2.76596
23.5	2.02128
23.97	1.91489
24.44	2.0922
24.91	1.87943
25.38	2.23404
25.85	2.48227
26.32	2.41135
26.79	2.41135
27.26	2.44681
27.73	2.05674
28.2	2.23404
28.67	2.23404
29.14	2.02128
29.61	2.16312
30.08	1.80851
30.55	1.84397
31.02	0.95745
31.49	0.49645
31.96	0.42553
32.43	0.28369
32.9	0.03546
33.37	0
33.84	0
34.31	0
34.78	0
35.25	0
35.72	0
36.19	0
36.66	0
37.13	0
37.6	0
38.07	0
38.54	0
39.01	0
39.48	0.46099
39.95	0.49645
40.42	0.56738
40.89	0.78014
41.36	0.70922
41.83	0.88652
42.3	0.70922
42.77	0.88652
43.24	0.78014
43.71	0.67376
44.18	0.74468
44.65	0.78014
45.12	0.70922
45.59	0.67376
46.06	0.74468
46.53	0.67376
47	0.6383

## Sheet: D ii
	acsf			low k			0			acsf
	Time (ms)	voltage (mv)		Time (ms)	voltage (mv)		Time (ms)	voltage (mv)		Time (ms)	voltage (mv)
	0	-0.39673		0	-0.39063		0	-0.39673		0	-0.36621
	0.10938	-0.39673		0	-0.37231		0	-0.354		0	-0.40894
	0.20313	-0.41504		0.125	-0.39673		0	-0.40894		0.25	-0.38452
	0.3125	-0.39063		0.25	-0.39063		0.25	-0.42114		0.25	-0.43335
	0.40625	-0.38452		0.375	-0.40894		0.25	-0.41504		0.5	-0.42725
	0.5	-0.36621		0.5	-0.37842		0.5	-0.44556		0.5	-0.39673
	0.60938	-0.37842		0.5	-0.42114		0.5	-0.39673		0.5	-0.43335
	0.70313	-0.354		0.625	-0.42114		0.5	-0.42114		0.75	-0.44556
	0.8125	-0.39673		0.75	-0.42725		0.75	-0.39673		0.75	-0.36621
	0.90625	-0.39063		0.875	-0.49438		0.75	-0.37842		1	-0.38452
	1	-0.41504		1	-0.45776		1	-0.36011		1	-0.40894
	1.10938	-0.38452		1	-0.49438		1	-0.40894		1	-0.40283
	1.20313	-0.40283		1.125	-0.47607		1	-0.36621		1.25	-0.39063
	1.3125	-0.39063		1.25	-0.48828		1.25	-0.39063		1.25	-0.354
	1.40625	-0.39063		1.375	-0.48218		1.25	-0.42114		1.5	-0.33569
	1.5	-0.42725		1.5	-0.48828		1.5	-0.3479		1.5	-0.39673
	1.60938	-0.39063		1.5	-0.50659		1.5	-0.40894		1.5	-0.36621
	1.70313	-0.42725		1.625	-0.48218		1.5	-0.38452		1.75	-0.39063
	1.8125	-0.43335		1.75	-0.5188		1.75	-0.37842		1.75	-0.38452
	1.90625	-0.41504		1.875	-0.46387		1.75	-0.38452		2	-0.39063
	2	-0.41504		2	-0.50049		2	-0.39063		2	-0.36621
	2.10938	-0.44556		2	-0.47607		2	-0.37842		2	-0.40283
	2.20313	-0.42725		2.125	-0.49438		2	-0.39673		2.25	-0.33569
	2.3125	-0.39063		2.25	-0.48828		2.25	-0.41504		2.25	-0.354
	2.40625	-0.42114		2.375	-0.48218		2.25	-0.38452		2.5	-0.40894
	2.5	-0.39063		2.5	-0.43335		2.5	-0.42725		2.5	-0.37842
	2.60938	-0.42114		2.5	-0.43335		2.5	-0.37842		2.5	-0.40894
	2.70313	-0.43335		2.625	-0.46997		2.5	-0.42725		2.75	-0.40283
	2.8125	-0.42114		2.75	-0.42725		2.75	-0.40283		2.75	-0.43335
	2.90625	-0.42114		2.875	-0.41504		2.75	-0.40894		3	-0.40894
	3	-0.42725		3	-0.41504		3	-0.42114		3	-0.40894
	3.10938	-0.38452		3	-0.42114		3	-0.45776		3	-0.39673
	3.20313	-0.40283		3.125	-0.39063		3	-0.45166		3.25	-0.38452
	3.3125	-0.43335		3.25	-0.40283		3.25	-0.40894		3.25	-0.40894
	3.40625	-0.39063		3.375	-0.37842		3.25	-0.40283		3.5	-0.40283
	3.5	-0.44556		3.5	-0.36011		3.5	-0.43335		3.5	-0.43945
	3.60938	-0.42725		3.5	-0.39673		3.5	-0.42114		3.5	-0.39063
	3.70313	-0.40283		3.625	-0.36011		3.5	-0.43945		3.75	-0.41504
	3.8125	-0.40283		3.75	-0.41504		3.75	-0.45776		3.75	-0.37842
	3.90625	-0.41504		3.875	-0.40283		3.75	-0.46387		4	-0.39673
	4	-0.38452		4	-0.37842		4	-0.43335		4	-0.36011
	4.10938	-0.41504		4	-0.36621		4	-0.43945		4	-0.37231
	4.20313	-0.42725		4.125	-0.40283		4	-0.41504		4.25	-0.40283
	4.3125	-0.37231		4.25	-0.39063		4.25	-0.43945		4.25	-0.36621
	4.40625	-0.40283		4.375	-0.43945		4.25	-0.39673		4.5	-0.38452
	4.5	-0.36621		4.5	-0.40894		4.5	-0.39063		4.5	-0.38452
	4.60938	-0.38452		4.5	-0.354		4.5	-0.36621		4.5	-0.41504
	4.70313	-0.40283		4.625	-0.42114		4.5	-0.39063		4.75	-0.40894
	4.8125	-0.37842		4.75	-0.37842		4.75	-0.354		4.75	-0.45166
	4.90625	-0.36621		4.875	-0.39673		4.75	-0.39063		5	-0.43945
	5	-0.38452		5	-0.43335		5	-0.36621		5	-0.40283
	5.10938	-0.37842		5	-0.44556		5	-0.32349		5	-0.41504
	5.20313	-0.37231		5.125	-0.40894		5	-0.36011		5.25	-0.38452
	5.3125	-0.41504		5.25	-0.40894		5.25	-0.31738		5.25	-0.40894
	5.40625	-0.36011		5.375	-0.39063		5.25	-0.3418		5.5	-0.39063
	5.5	-0.38452		5.5	-0.39063		5.5	-0.37231		5.5	-0.42114
	5.60938	-0.39673		5.5	-0.44556		5.5	-0.37231		5.5	-0.43335
	5.70313	-0.37842		5.625	-0.37231		5.5	-0.33569		5.75	-0.43945
	5.8125	-0.37231		5.75	-0.40283		5.75	-0.36011		5.75	-0.38452
	5.90625	-0.39063		5.875	-0.37842		5.75	-0.31128		6	-0.42725
	6	-0.36621		6	-0.36621		6	-0.32959		6	-0.43945
	6.10938	-0.38452		6	-0.38452		6	-0.40894		6	-0.40894
	6.20313	-0.39673		6.125	-0.38452		6	-0.36011		6.25	-0.43335
	6.3125	-0.37842		6.25	-0.3479		6.25	-0.38452		6.25	-0.40283
	6.40625	-0.40894		6.375	-0.39063		6.25	-0.354		6.5	-0.39063
	6.5	-0.354		6.5	-0.44556		6.5	-0.32349		6.5	-0.39063
	6.60938	-0.37842		6.5	-0.37842		6.5	-0.3479		6.5	-0.38452
	6.70313	-0.36621		6.625	-0.41504		6.5	-0.354		6.75	-0.3479
	6.8125	-0.37842		6.75	-0.39673		6.75	-0.32959		6.75	-0.40283
	6.90625	-0.38452		6.875	-0.40283		6.75	-0.3418		7	-0.36621
	7	-0.40283		7	-0.39673		7	-0.37842		7	-0.37231
	7.10938	-0.36621		7	-0.41504		7	-0.32959		7	-0.41504
	7.20313	-0.36621		7.125	-0.39673		7	-0.39063		7.25	-0.354
	7.3125	-0.39063		7.25	-0.42725		7.25	-0.36011		7.25	-0.40283
	7.40625	-0.41504		7.375	-0.42725		7.25	-0.3418		7.5	-0.39063
	7.5	-0.43335		7.5	-0.38452		7.5	-0.36011		7.5	-0.39063
	7.60938	-0.39673		7.5	-0.42725		7.5	-0.36621		7.5	-0.37842
	7.70313	-0.42725		7.625	-0.39063		7.5	-0.37231		7.75	-0.37231
	7.8125	-0.42114		7.75	-0.39063		7.75	-0.39673		7.75	-0.33569
	7.90625	-0.40283		7.875	-0.37842		7.75	-0.39063		8	-0.37842
	8	-0.45166		8	-0.37842		8	-0.37231		8	-0.40283
	8.10938	-0.42114		8	-0.39063		8	-0.40894		8	-0.36621
	8.20313	-0.45166		8.125	-0.40283		8	-0.36621		8.25	-0.38452
	8.3125	-0.48828		8.25	-0.42725		8.25	-0.40894		8.25	-0.37231
	8.40625	-0.50049		8.375	-0.40283		8.25	-0.42725		8.5	-0.36011
	8.5	-0.44556		8.5	-0.42725		8.5	-0.40894		8.5	-0.32349
	8.60938	-0.48828		8.5	-0.39673		8.5	-0.43335		8.5	-0.32959
	8.70313	-0.45776		8.625	-0.42114		8.5	-0.47607		8.75	-0.32959
	8.8125	-0.45166		8.75	-0.42114		8.75	-0.43945		8.75	-0.39063
	8.90625	-0.45776		8.875	-0.47607		8.75	-0.42725		9	-0.39063
	9	-0.39673		9	-0.45166		9	-0.46387		9	-0.38452
	9.10938	-0.46387		9	-0.43335		9	-0.42725		9	-0.38452
	9.20313	-0.45166		9.125	-0.42114		9	-0.44556		9.25	-0.33569
	9.3125	-0.45776		9.25	-0.39063		9.25	-0.40894		9.25	-0.3479
	9.40625	-0.45776		9.375	-0.42725		9.25	-0.41504		9.5	-0.39673
	9.5	-0.45776		9.5	-0.42114		9.5	-0.40894		9.5	-0.37842
	9.60938	-0.41504		9.5	-0.43335		9.5	-0.40283		9.5	-0.37842
	9.70313	-0.45166		9.625	-0.42114		9.5	-0.40283		9.75	-0.39063
	9.8125	-0.45776		9.75	-0.42725		9.75	-0.37231		9.75	-0.37231
	9.90625	-0.40894		9.875	-0.43945		9.75	-0.39063		10	-0.37231
	10	-0.48218		10	-0.46997		10	-0.40283		10	-0.39673
	10.1094	-0.44556		10	-0.45776		10	-0.45776		10	-0.40894
	10.2031	-0.43945		10.125	-0.41504		10	-0.43335		10.25	-0.44556
	10.3125	-0.43335		10.25	-0.45166		10.25	-0.42725		10.25	-0.43335
	10.4062	-0.42114		10.375	-0.40283		10.25	-0.39673		10.5	-0.42725
	10.5	-0.37842		10.5	-0.42725		10.5	-0.39063		10.5	-0.40283
	10.6094	-0.39063		10.5	-0.40894		10.5	-0.37842		10.5	-0.41504
	10.7031	-0.39063		10.625	-0.39673		10.5	-0.38452		10.75	-0.41504
	10.8125	-0.40283		10.75	-0.3479		10.75	-0.40894		10.75	-0.41504
	10.9062	-0.43945		10.875	-0.36011		10.75	-0.37231		11	-0.41504
	11	-0.39063		11	-0.3479		11	-0.39063		11	-0.37231
	11.1094	-0.43335		11	-0.32349		11	-0.40894		11	-0.43945
	11.2031	-0.39673		11.125	-0.37842		11	-0.42725		11.25	-0.42114
	11.3125	-0.36621		11.25	-0.31128		11.25	-0.37842		11.25	-0.42114
	11.4062	-0.37231		11.375	-0.3418		11.25	-0.42725		11.5	-0.39673
	11.5	-0.40283		11.5	-0.31128		11.5	-0.41504		11.5	-0.44556
	11.6094	-0.39063		11.5	-0.30518		11.5	-0.41504		11.5	-0.42114
	11.7031	-0.40894		11.625	-0.3418		11.5	-0.40283		11.75	-0.40283
	11.8125	-0.40894		11.75	-0.3479		11.75	-0.38452		11.75	-0.44556
	11.9062	-0.36621		11.875	-0.32349		11.75	-0.39063		12	-0.38452
	12	-0.42725		12	-0.3479		12	-0.37231		12	-0.42114
	12.1094	-0.37842		12	-0.36011		12	-0.38452		12	-0.42114
	12.2031	-0.39063		12.125	-0.29907		12	-0.43945		12.25	-0.43335
	12.3125	-0.354		12.25	-0.3418		12.25	-0.40283		12.25	-0.42725
	12.4062	-0.37842		12.375	-0.31128		12.25	-0.3479		12.5	-0.46387
	12.5	-0.36011		12.5	-0.31738		12.5	-0.39063		12.5	-0.43335
	12.6094	-0.3479		12.5	-0.36011		12.5	-0.40894		12.5	-0.43945
	12.7031	-0.36011		12.625	-0.37231		12.5	-0.36621		12.75	-0.42725
	12.8125	-0.354		12.75	-0.3418		12.75	-0.41504		12.75	-0.38452
	12.9062	-0.40894		12.875	-0.33569		12.75	-0.36621		13	-0.43945
	13	-0.37842		13	-0.32959		13	-0.38452		13	-0.40283
	13.1094	-0.38452		13	-0.3479		13	-0.38452		13	-0.41504
	13.2031	-0.37231		13.125	-0.41504		13	-0.36621		13.25	-0.40283
	13.3125	-0.38452		13.25	-0.38452		13.25	-0.36011		13.25	-0.39063
	13.4062	-0.37842		13.375	-0.40283		13.25	-0.37842		13.5	-0.354
	13.5	-0.36621		13.5	-0.38452		13.5	-0.33569		13.5	-0.40283
	13.6094	-0.39063		13.5	-0.36011		13.5	-0.32959		13.5	-0.40283
	13.7031	-0.354		13.625	-0.38452		13.5	-0.36621		13.75	-0.37231
	13.8125	-0.39673		13.75	-0.41504		13.75	-0.30518		13.75	-0.42114
	13.9062	-0.39063		13.875	-0.40894		13.75	-0.36011		14	-0.36621
	14	-0.39673		14	-0.42725		14	-0.3479		14	-0.39063
	14.1094	-0.37842		14	-0.44556		14	-0.3418		14	-0.41504
	14.2031	-0.40894		14.125	-0.38452		14	-0.36621		14.25	-0.39673
	14.3125	-0.38452		14.25	-0.39063		14.25	-0.39673		14.25	-0.38452
	14.4062	-0.354		14.375	-0.39063		14.25	-0.37231		14.5	-0.37842
	14.5	-0.37231		14.5	-0.39673		14.5	-0.39063		14.5	-0.32349
	14.6094	-0.36621		14.5	-0.39063		14.5	-0.42725		14.5	-0.3479
	14.7031	-0.42725		14.625	-0.40283		14.5	-0.38452		14.75	-0.39673
	14.8125	-0.40894		14.75	-0.42114		14.75	-0.44556		14.75	-0.354
	14.9062	-0.41504		14.875	-0.40283		14.75	-0.39063		15	-0.41504
	15	-0.39673		15	-0.39673		15	-0.40894		15	-0.38452
	15.1094	-0.42725		15	-0.38452		15	-0.42114		15	-0.36621
	15.2031	-0.39673		15.125	-0.40283		15	-0.42725		15.25	-0.37231
	15.3125	-0.42725		15.25	-0.354		15.25	-0.43945		15.25	-0.36621
	15.4062	-0.42725		15.375	-0.39673		15.25	-0.42725		15.5	-0.3418
	15.5	-0.40894		15.5	-0.43335		15.5	-0.42725		15.5	-0.354
	15.6094	-0.45776		15.5	-0.45166		15.5	-0.43945		15.5	-0.36011
	15.7031	-0.42114		15.625	-0.44556		15.5	-0.50049		15.75	-0.3479
	15.8125	-0.43335		15.75	-0.43945		15.75	-0.42725		15.75	-0.40283
	15.9062	-0.45166		15.875	-0.42114		15.75	-0.44556		16	-0.354
	16	-0.44556		16	-0.37231		16	-0.43945		16	-0.39673
	16.1094	-0.40283		16	-0.36621		16	-0.42725		16	-0.41504
	16.2031	-0.44556		16.125	-0.38452		16	-0.43945		16.25	-0.38452
	16.3125	-0.42114		16.25	-0.37231		16.25	-0.45166		16.25	-0.38452
	16.4062	-0.43945		16.375	-0.37842		16.25	-0.44556		16.5	-0.41504
	16.5	-0.46997		16.5	-0.40894		16.5	-0.42114		16.5	-0.39063
	16.6094	-0.43335		16.5	-0.42725		16.5	-0.46997		16.5	-0.40283
	16.7031	-0.42725		16.625	-0.41504		16.5	-0.43945		16.75	-0.45166
	16.8125	-0.43335		16.75	-0.46387		16.75	-0.47607		16.75	-0.40894
	16.9062	-0.40283		16.875	-0.42114		16.75	-0.43335		17	-0.46997
	17	-0.43945		17	-0.44556		17	-0.43335		17	-0.46387
	17.1094	-0.42725		17	-0.42725		17	-0.45776		17	-0.46997
	17.2031	-0.37842		17.125	-0.42725		17	-0.43335		17.25	-0.47607
	17.3125	-0.39063		17.25	-0.43945		17.25	-0.43335		17.25	-0.45166
	17.4062	-0.43335		17.375	-0.42725		17.25	-0.43335		17.5	-0.46387
	17.5	-0.37231		17.5	-0.40283		17.5	-0.43945		17.5	-0.46997
	17.6094	-0.41504		17.5	-0.41504		17.5	-0.42114		17.5	-0.46997
	17.7031	-0.37842		17.625	-0.40894		17.5	-0.45166		17.75	-0.45776
	17.8125	-0.36011		17.75	-0.36011		17.75	-0.42725		17.75	-0.45166
	17.9062	-0.37231		17.875	-0.42725		17.75	-0.40283		18	-0.42725
	18	-0.39063		18	-0.38452		18	-0.37842		18	-0.43335
	18.1094	-0.3479		18	-0.37231		18	-0.40894		18	-0.43945
	18.2031	-0.354		18.125	-0.37842		18	-0.41504		18.25	-0.43945
	18.3125	-0.354		18.25	-0.36621		18.25	-0.41504		18.25	-0.43335
	18.4062	-0.3418		18.375	-0.37231		18.25	-0.44556		18.5	-0.42114
	18.5	-0.38452		18.5	-0.39673		18.5	-0.37842		18.5	-0.45776
	18.6094	-0.33569		18.5	-0.41504		18.5	-0.39063		18.5	-0.41504
	18.7031	-0.3479		18.625	-0.40283		18.5	-0.39063		18.75	-0.45166
	18.8125	-0.354		18.75	-0.45166		18.75	-0.39063		18.75	-0.44556
	18.9062	-0.32349		18.875	-0.37842		18.75	-0.37231		19	-0.45776
	19	-0.30518		19	-0.42114		19	-0.39063		19	-0.41504
	19.1094	-0.30518		19	-0.40283		19	-0.39673		19	-0.42725
	19.2031	-0.33569		19.125	-0.37842		19	-0.38452		19.25	-0.40283
	19.3125	-0.32349		19.25	-0.36621		19.25	-0.39063		19.25	-0.38452
	19.4062	-0.36011		19.375	-0.36621		19.25	-0.33569		19.5	-0.42725
	19.5	-0.32959		19.5	-0.33569		19.5	-0.39673		19.5	-0.37842
	19.6094	-0.32959		19.5	-0.354		19.5	-0.39063		19.5	-0.41504
	19.7031	-0.32959		19.625	-0.37231		19.5	-0.39063		19.75	-0.41504
	19.8125	-0.354		19.75	-0.3479		19.75	-0.39063		19.75	-0.44556
	19.9062	-0.32959		19.875	-0.42725		19.75	-0.39063		20	-0.41504
	20	-0.3479		20	-0.39673		20	-0.40283		20	-0.37842
	20.1094	-0.39063		20	-0.38452		20	-0.42114		20	-0.3479
	20.2031	-0.37842		20.125	-0.39673		20	-0.39673		20.25	-0.39673
	20.3125	-0.39673		20.25	-0.39673		20.25	-0.39673		20.25	-0.42725
	20.4062	-0.36011		20.375	-0.42114		20.25	-0.39673		20.5	-0.36621
	20.5	-0.37842		20.5	-0.43335		20.5	-0.37231		20.5	-0.39673
	20.6094	-0.36621		20.5	-0.43945		20.5	-0.36621		20.5	-0.36621
	20.7031	-0.39673		20.625	-0.41504		20.5	-0.37842		20.75	-0.37231
	20.8125	-0.37842		20.75	-0.46997		20.75	-0.32959		20.75	-0.38452
	20.9062	-0.40894		20.875	-0.42114		20.75	-0.3479		21	-0.38452
	21	-0.41504		21	-0.45166		21	-0.354		21	-0.37231
	21.1094	-0.38452		21	-0.47607		21	-0.33569		21	-0.37842
	21.2031	-0.43335		21.125	-0.44556		21	-0.3479		21.25	-0.36011
	21.3125	-0.39673		21.25	-0.45776		21.25	-0.43335		21.25	-0.37231
	21.4062	-0.40283		21.375	-0.46387		21.25	-0.38452		21.5	-0.42725
	21.5	-0.39063		21.5	-0.46387		21.5	-0.43945		21.5	-0.36621
	21.6094	-0.40283		21.5	-0.45776		21.5	-0.40894		21.5	-0.40894
	21.7031	-0.39063		21.625	-0.47607		21.5	-0.37231		21.75	-0.41504
	21.8125	-0.40894		21.75	-0.44556		21.75	-0.39063		21.75	-0.38452
	21.9062	-0.40283		21.875	-0.45776		21.75	-0.37842		22	-0.39673
	22	-0.37842		22	-0.44556		22	-0.39673		22	-0.38452
	22.1094	-0.41504		22	-0.44556		22	-0.43335		22	-0.37842
	22.2031	-0.36621		22.125	-0.44556		22	-0.45776		22.25	-0.42114
	22.3125	-0.41504		22.25	-0.44556		22.25	-0.42114		22.25	-0.42725
	22.4062	-0.43945		22.375	-0.46387		22.25	-0.45166		22.5	-0.3479
	22.5	-0.42114		22.5	-0.45166		22.5	-0.40283		22.5	-0.39673
	22.6094	-0.42725		22.5	-0.46387		22.5	-0.44556		22.5	-0.36011
	22.7031	-0.47607		22.625	-0.41504		22.5	-0.45776		22.75	-0.37231
	22.8125	-0.40283		22.75	-0.43335		22.75	-0.42114		22.75	-0.39063
	22.9062	-0.43335		22.875	-0.42114		22.75	-0.42725		23	-0.36011
	23	-0.42725		23	-0.42725		23	-0.41504		23	-0.38452
	23.1094	-0.40283		23	-0.40283		23	-0.42114		23	-0.40894
	23.2031	-0.43945		23.125	-0.42725		23	-0.40894		23.25	-0.41504
	23.3125	-0.43945		23.25	-0.41504		23.25	-0.45776		23.25	-0.39063
	23.4062	-0.40283		23.375	-0.38452		23.25	-0.39673		23.5	-0.40894
	23.5	-0.45776		23.5	-0.41504		23.5	-0.40283		23.5	-0.354
	23.6094	-0.45166		23.5	-0.39673		23.5	-0.39063		23.5	-0.39673
	23.7031	-0.44556		23.625	-0.44556		23.5	-0.37842		23.75	-0.40894
	23.8125	-0.44556		23.75	-0.42114		23.75	-0.39673		23.75	-0.39673
	23.9062	-0.39063		23.875	-0.40283		23.75	-0.39063		24	-0.42114
	24	-0.37842		24	-0.39673		24	-0.40894		24	-0.40894
	24.1094	-0.39673		24	-0.42725		24	-0.38452		24	-0.43945
	24.2031	-0.3479		24.125	-0.40283		24	-0.39673		24.25	-0.43335
	24.3125	-0.39063		24.25	-0.37842		24.25	-0.40894		24.25	-0.45166
	24.4062	-0.39063		24.375	-0.39063		24.25	-0.43945		24.5	-0.41504
	24.5	-0.37842		24.5	-0.354		24.5	-0.40894		24.5	-0.40894
	24.6094	-0.39063		24.5	-0.37842		24.5	-0.37842		24.5	-0.37231
	24.7031	-0.40283		24.625	-0.39063		24.5	-0.39673		24.75	-0.40283
	24.8125	-0.40283		24.75	-0.36011		24.75	-0.40283		24.75	-0.41504
	24.9062	-0.41504		24.875	-0.37842		24.75	-0.39673		25	-0.42114
	25	-0.40894		25	-0.36621		25	-0.3479		25	-0.43335
	25.1094	-0.37842		25	-0.3418		25	-0.354		25	-0.44556
	25.2031	-0.40283		25.125	-0.3479		25	-0.32959		25.25	-0.46997
	25.3125	-0.37842		25.25	-0.37231		25.25	-0.354		25.25	-0.46387
	25.4062	-0.37842		25.375	-0.354		25.25	-0.37842		25.5	-0.48828
	25.5	-0.36011		25.5	-0.41504		25.5	-0.37842		25.5	-0.48218
	25.6094	-0.37231		25.5	-0.37842		25.5	-0.36621		25.5	-0.45776
	25.7031	-0.37842		25.625	-0.38452		25.5	-0.354		25.75	-0.45166
	25.8125	-0.354		25.75	-0.40283		25.75	-0.39063		25.75	-0.43945
	25.9062	-0.38452		25.875	-0.36621		25.75	-0.37231		26	-0.39673
	26	-0.354		26	-0.354		26	-0.40894		26	-0.40283
	26.1094	-0.40894		26	-0.36011		26	-0.36621		26	-0.41504
	26.2031	-0.36621		26.125	-0.36011		26	-0.40283		26.25	-0.38452
	26.3125	-0.36621		26.25	-0.38452		26.25	-0.39673		26.25	-0.42114
	26.4062	-0.3479		26.375	-0.44556		26.25	-0.354		26.5	-0.42725
	26.5	-0.36621		26.5	-0.39673		26.5	-0.33569		26.5	-0.45166
	26.6094	-0.36621		26.5	-0.43335		26.5	-0.3418		26.5	-0.42114
	26.7031	-0.354		26.625	-0.42114		26.5	-0.36011		26.75	-0.40283
	26.8125	-0.40283		26.75	-0.39673		26.75	-0.36621		26.75	-0.37842
	26.9062	-0.36011		26.875	-0.43335		26.75	-0.38452		27	-0.36011
	27	-0.39063		27	-0.45776		27	-0.37231		27	-0.37231
	27.1094	-0.38452		27	-0.44556		27	-0.43335		27	-0.3418
	27.2031	-0.37842		27.125	-0.42725		27	-0.40894		27.25	-0.37231
	27.3125	-0.3418		27.25	-0.45166		27.25	-0.44556		27.25	-0.31128
	27.4062	-0.39673		27.375	-0.40283		27.25	-0.42725		27.5	-0.30518
	27.5	-0.39673		27.5	-0.43945		27.5	-0.40894		27.5	-0.3479
	27.6094	-0.40283		27.5	-0.42114		27.5	-0.39063		27.5	-0.3418
	27.7031	-0.46387		27.625	-0.42725		27.5	-0.42114		27.75	-0.32959
	27.8125	-0.43335		27.75	-0.42114		27.75	-0.38452		27.75	-0.354
	27.9062	-0.45166		27.875	-0.42114		27.75	-0.37231		28	-0.38452
	28	-0.44556		28	-0.45776		28	-0.42725		28	-0.3479
	28.1094	-0.42114		28	-0.45166		28	-0.38452		28	-0.37842
	28.2031	-0.43335		28.125	-0.46997		28	-0.43335		28.25	-0.29907
	28.3125	-0.46387		28.25	-0.46387		28.25	-0.45166		28.25	-0.32959
	28.4062	-0.42114		28.375	-0.49438		28.25	-0.42114		28.5	-0.32959
	28.5	-0.44556		28.5	-0.46387		28.5	-0.43335		28.5	-0.29907
	28.6094	-0.47607		28.5	-0.45776		28.5	-0.44556		28.5	-0.33569
	28.7031	-0.44556		28.625	-0.43945		28.5	-0.39673		28.75	-0.32349
	28.8125	-0.49438		28.75	-0.43945		28.75	-0.42725		28.75	-0.32959
	28.9062	-0.45776		28.875	-0.46387		28.75	-0.42114		29	-0.3418
	29	-0.44556		29	-0.44556		29	-0.38452		29	-0.38452
	29.1094	-0.45776		29	-0.45776		29	-0.46387		29	-0.33569
	29.2031	-0.48218		29.125	-0.40894		29	-0.45166		29.25	-0.39673
	29.3125	-0.43335		29.25	-0.40894		29.25	-0.45166		29.25	-0.39673
	29.4062	-0.46997		29.375	-0.39063		29.25	-0.44556		29.5	-0.36011
	29.5	-0.47607		29.5	-0.40283		29.5	-0.38452		29.5	-0.37842
	29.6094	-0.45166		29.5	-0.39673		29.5	-0.40283		29.5	-0.36011
	29.7031	-0.49438		29.625	-0.40894		29.5	-0.41504		29.75	-0.37231
	29.8125	-0.43945		29.75	-0.40894		29.75	-0.40894		29.75	-0.39063
	29.9062	-0.43335		29.875	-0.39673		29.75	-0.38452		30	-0.40894
	30	-0.44556		30	-0.41504		30	-0.41504		30	-0.38452
	30.1094	-0.43335		30	-0.37842		30	-0.36011		30	-0.45166
	30.2031	-0.43335		30.125	-0.39673		30	-0.40894		30.25	-0.37231
	30.3125	-0.46387		30.25	-0.36011		30.25	-0.42114		30.25	-0.39673
	30.4062	-0.44556		30.375	-0.36621		30.25	-0.37842		30.5	-0.40283
	30.5	-0.42114		30.5	-0.36621		30.5	-0.39673		30.5	-0.37842
	30.6094	-0.43335		30.5	-0.3479		30.5	-0.354		30.5	-0.40894
	30.7031	-0.38452		30.625	-0.3479		30.5	-0.37231		30.75	-0.42114
	30.8125	-0.42725		30.75	-0.37231		30.75	-0.38452		30.75	-0.41504
	30.9062	-0.42114		30.875	-0.354		30.75	-0.41504		31	-0.42114
	31	-0.40283		31	-0.31738		31	-0.38452		31	-0.43945
	31.1094	-0.37231		31	-0.36621		31	-0.40283		31	-0.40283
	31.2031	-0.40283		31.125	-0.32349		31	-0.39673		31.25	-0.43335
	31.3125	-0.40894		31.25	-0.3418		31.25	-0.39063		31.25	-0.40894
	31.4062	-0.42114		31.375	-0.32349		31.25	-0.43335		31.5	-0.41504
	31.5	-0.42114		31.5	-0.31738		31.5	-0.38452		31.5	-0.44556
	31.6094	-0.37842		31.5	-0.32959		31.5	-0.40894		31.5	-0.42114
	31.7031	-0.40283		31.625	-0.3418		31.5	-0.37842		31.75	-0.43945
	31.8125	-0.36621		31.75	-0.31738		31.75	-0.37842		31.75	-0.43945
	31.9062	-0.37842		31.875	-0.32349		31.75	-0.37842		32	-0.45776
	32	-0.39673		32	-0.3479		32	-0.37842		32	-0.44556
	32.1094	-0.39673		32	-0.29907		32	-0.354		32	-0.47607
	32.2031	-0.39063		32.125	-0.36011		32	-0.37842		32.25	-0.43335
	32.3125	-0.38452		32.25	-0.39063		32.25	-0.40894		32.25	-0.42114
	32.4062	-0.39673		32.375	-0.36011		32.25	-0.38452		32.5	-0.44556
	32.5	-0.37231		32.5	-0.39063		32.5	-0.37231		32.5	-0.42725
	32.6094	-0.39673		32.5	-0.38452		32.5	-0.3479		32.5	-0.46387
	32.7031	-0.39063		32.625	-0.3418		32.5	-0.39673		32.75	-0.41504
	32.8125	-0.38452		32.75	-0.39063		32.75	-0.37231		32.75	-0.43335
	32.9062	-0.354		32.875	-0.37231		32.75	-0.39673		33	-0.39673
	33	-0.40283		33	-0.3418		33	-0.39673		33	-0.40894
	33.1094	-0.39063		33	-0.37842		33	-0.41504		33	-0.40894
	33.2031	-0.40283		33.125	-0.33569		33	-0.40894		33.25	-0.40894
	33.3125	-0.43335		33.25	-0.354		33.25	-0.37231		33.25	-0.40894
	33.4062	-0.40283		33.375	-0.354		33.25	-0.38452		33.5	-0.41504
	33.5	-0.38452		33.5	-0.36621		33.5	-0.36621		33.5	-0.43335
	33.6094	-0.38452		33.5	-0.40283		33.5	-0.39673		33.5	-0.39673
	33.7031	-0.36621		33.625	-0.41504		33.5	-0.32959		33.75	-0.42725
	33.8125	-0.37231		33.75	-0.39063		33.75	-0.37842		33.75	-0.43945
	33.9062	-0.40283		33.875	-0.37842		33.75	-0.37231		34	-0.45166
	34	-0.354		34	-0.39673		34	-0.37842		34	-0.44556
	34.1094	-0.36621		34	-0.36621		34	-0.40894		34	-0.40894
	34.2031	-0.37842		34.125	-0.40283		34	-0.37231		34.25	-0.38452
	34.3125	-0.3418		34.25	-0.40283		34.25	-0.37842		34.25	-0.36621
	34.4062	-0.39673		34.375	-0.37842		34.25	-0.39673		34.5	-0.37842
	34.5	-0.38452		34.5	-0.40894		34.5	-0.42114		34.5	-0.39063
	34.6094	-0.36621		34.5	-0.40283		34.5	-0.37231		34.5	-0.36621
	34.7031	-0.37842		34.625	-0.40894		34.5	-0.42725		34.75	-0.32959
	34.8125	-0.39063		34.75	-0.38452		34.75	-0.40894		34.75	-0.37231
	34.9062	-0.36621		34.875	-0.39063		34.75	-0.43945		35	-0.32959
	35	-0.41504		35	-0.36011		35	-0.44556		35	-0.3418
	35.1094	-0.42725		35	-0.40894		35	-0.40894		35	-0.37231
	35.2031	-0.40283		35.125	-0.36621		35	-0.46997		35.25	-0.36011
	35.3125	-0.45166		35.25	-0.39063		35.25	-0.45776		35.25	-0.37842
	35.4062	-0.40894		35.375	-0.43335		35.25	-0.45776		35.5	-0.36011
	35.5	-0.40894		35.5	-0.37231		35.5	-0.45166		35.5	-0.36621
	35.6094	-0.42725		35.5	-0.39673		35.5	-0.46997		35.5	-0.3479
	35.7031	-0.39063		35.625	-0.39063		35.5	-0.42725		35.75	-0.37231
	35.8125	-0.37231		35.75	-0.42114		35.75	-0.47607		35.75	-0.32349
	35.9062	-0.41504		35.875	-0.40894		35.75	-0.46387		36	-0.36011
	36	-0.42725		36	-0.46997		36	-0.42725		36	-0.354
	36.1094	-0.44556		36	-0.44556		36	-0.45776		36	-0.36011
	36.2031	-0.46387		36.125	-0.43335		36	-0.43945		36.25	-0.42114
	36.3125	-0.38452		36.25	-0.42725		36.25	-0.45776		36.25	-0.41504
	36.4062	-0.40894		36.375	-0.42114		36.25	-0.46387		36.5	-0.40283
	36.5	-0.41504		36.5	-0.40894		36.5	-0.45776		36.5	-0.41504
	36.6094	-0.40894		36.5	-0.39673		36.5	-0.45776		36.5	-0.45166
	36.7031	-0.40283		36.625	-0.42725		36.5	-0.46997		36.75	-0.41504
	36.8125	-0.40894		36.75	-0.37842		36.75	-0.43945		36.75	-0.46387
	36.9062	-0.40283		36.875	-0.40894		36.75	-0.43335		37	-0.42725
	37	-0.42114		37	-0.39673		37	-0.42114		37	-0.41504
	37.1094	-0.45776		37	-0.42725		37	-0.39063		37	-0.48218
	37.2031	-0.40894		37.125	-0.42725		37	-0.43945		37.25	-0.42725
	37.3125	-0.42725		37.25	-0.45166		37.25	-0.46387		37.25	-0.46387
	37.4062	-0.39673		37.375	-0.45776		37.25	-0.40894		37.5	-0.45776
	37.5	-0.39673		37.5	-0.44556		37.5	-0.40894		37.5	-0.43335
	37.6094	-0.37842		37.5	-0.45776		37.5	-0.43945		37.5	-0.43335
	37.7031	-0.39063		37.625	-0.40283		37.5	-0.37842		37.75	-0.43945
	37.8125	-0.36011		37.75	-0.43945		37.75	-0.39673		37.75	-0.38452
	37.9062	-0.37231		37.875	-0.36011		37.75	-0.40283		38	-0.42725
	38	-0.38452		38	-0.3418		38	-0.37842		38	-0.47607
	38.1094	-0.354		38	-0.38452		38	-0.41504		38	-0.43335
	38.2031	-0.37842		38.125	-0.36621		38	-0.38452		38.25	-0.48218
	38.3125	-0.3418		38.25	-0.354		38.25	-0.39673		38.25	-0.44556
	38.4062	-0.36011		38.375	-0.36621		38.25	-0.39673		38.5	-0.43945
	38.5	-0.354		38.5	-0.37842		38.5	-0.38452		38.5	-0.46387
	38.6094	-0.36011		38.5	-0.37842		38.5	-0.36011		38.5	-0.46997
	38.7031	-0.32959		38.625	-0.44556		38.5	-0.39673		38.75	-0.44556
	38.8125	-0.31738		38.75	-0.40283		38.75	-0.37231		38.75	-0.44556
	38.9062	-0.36011		38.875	-0.41504		38.75	-0.354		39	-0.43335
	39	-0.33569		39	-0.37842		39	-0.39063		39	-0.44556
	39.1094	-0.39063		39	-0.354		39	-0.3418		39	-0.46997
	39.2031	-0.40894		39.125	-0.40283		39	-0.37231		39.25	-0.41504
	39.3125	-0.39063		39.25	-0.38452		39.25	-0.37842		39.25	-0.43945
	39.4062	-0.354		39.375	-0.36011		39.25	-0.40894		39.5	-0.43335
	39.5	-0.37842		39.5	-0.36621		39.5	-0.39063		39.5	-0.40283
	39.6094	-0.32959		39.5	-0.39063		39.5	-0.41504		39.5	-0.37842
	39.7031	-0.3418		39.625	-0.3418		39.5	-0.40283		39.75	-0.40894
	39.8125	-0.3479		39.75	-0.39063		39.75	-0.39063		39.75	-0.41504
	39.9062	-0.36011		39.875	-0.39673		39.75	-0.39673		40	-0.40894
	40	-0.36011		40	-0.37842		40	-0.37231		40	-0.42114
	40.1094	-0.37842		40	-0.42114		40	-0.42114		40	-0.39063
	40.2031	-0.37231		40.125	-0.41504		40	-0.40894		40.25	-0.41504
	40.3125	-0.38452		40.25	-0.43945		40.25	-0.41504		40.25	-0.39673
	40.4062	-0.37842		40.375	-0.45166		40.25	-0.37231		40.5	-0.40283
	40.5	-0.354		40.5	-0.45166		40.5	-0.36621		40.5	-0.38452
	40.6094	-0.39673		40.5	-0.43335		40.5	-0.38452		40.5	-0.39673
	40.7031	-0.40283		40.625	-0.47607		40.5	-0.39063		40.75	-0.354
	40.8125	-0.37231		40.75	-0.43335		40.75	-0.43945		40.75	-0.3418
	40.9062	-0.42725		40.875	-0.45166		40.75	-0.41504		41	-0.3479
	41	-0.38452		41	-0.45776		41	-0.42114		41	-0.3479
	41.1094	-0.37842		41	-0.42114		41	-0.42114		41	-0.39673
	41.2031	-0.40283		41.125	-0.43335		41	-0.41504		41.25	-0.36621
	41.3125	-0.43335		41.25	-0.44556		41.25	-0.37842		41.25	-0.37842
	41.4062	-0.39673		41.375	-0.43945		41.25	-0.41504		41.5	-0.37231
	41.5	-0.43945		41.5	-0.45166		41.5	-0.36621		41.5	-0.43335
	41.6094	-0.39063		41.5	-0.46387		41.5	-0.37842		41.5	-0.38452
	41.7031	-0.39673		41.625	-0.45166		41.5	-0.42114		41.75	-0.37842
	41.8125	-0.40894		41.75	-0.45776		41.75	-0.39673		41.75	-0.36011
	41.9062	-0.354		41.875	-0.44556		41.75	-0.42114		42	-0.36011
	42	-0.41504		42	-0.44556		42	-0.40894		42	-0.40894
	42.1094	-0.40283		42	-0.47607		42	-0.42114		42	-0.45166
	42.2031	-0.40283		42.125	-0.44556		42	-0.42114		42.25	-0.40894
	42.3125	-0.40283		42.25	-0.45776		42.25	-0.44556		42.25	-0.39063
	42.4062	-0.43335		42.375	-0.43335		42.25	-0.40283		42.5	-0.41504
	42.5	-0.38452		42.5	-0.45776		42.5	-0.43335		42.5	-0.38452
	42.6094	-0.42114		42.5	-0.42725		42.5	-0.45166		42.5	-0.39063
	42.7031	-0.44556		42.625	-0.44556		42.5	-0.42725		42.75	-0.39063
	42.8125	-0.37842		42.75	-0.40894		42.75	-0.50049		42.75	-0.38452
	42.9062	-0.43335		42.875	-0.39063		42.75	-0.48828		43	-0.40283
	43	-0.42725		43	-0.42114		43	-0.43945		43	-0.36621
	43.1094	-0.42114		43	-0.38452		43	-0.44556		43	-0.37231
	43.2031	-0.41504		43.125	-0.39673		43	-0.45776		43.25	-0.37842
	43.3125	-0.43335		43.25	-0.39673		43.25	-0.41504		43.25	-0.39673
	43.4062	-0.40894		43.375	-0.41504		43.25	-0.44556		43.5	-0.354
	43.5	-0.41504		43.5	-0.38452		43.5	-0.41504		43.5	-0.41504
	43.6094	-0.41504		43.5	-0.42114		43.5	-0.38452		43.5	-0.39673
	43.7031	-0.40894		43.625	-0.43945		43.5	-0.42725		43.75	-0.38452
	43.8125	-0.44556		43.75	-0.39063		43.75	-0.38452		43.75	-0.42725
	43.9062	-0.39673		43.875	-0.36621		43.75	-0.39063		44	-0.42114
	44	-0.42725		44	-0.37231		44	-0.37231		44	-0.41504
	44.1094	-0.40283		44	-0.42725		44	-0.38452		44	-0.42114
	44.2031	-0.39063		44.125	-0.41504		44	-0.37231		44.25	-0.40283
	44.3125	-0.37231		44.25	-0.42725		44.25	-0.41504		44.25	-0.42114
	44.4062	-0.39063		44.375	-0.39063		44.25	-0.39063		44.5	-0.46387
	44.5	-0.40283		44.5	-0.39063		44.5	-0.42725		44.5	-0.43945
	44.6094	-0.37231		44.5	-0.39063		44.5	-0.45166		44.5	-0.44556
	44.7031	-0.42725		44.625	-0.36621		44.5	-0.40283		44.75	-0.48218
	44.8125	-0.40283		44.75	-0.36621		44.75	-0.40283		44.75	-0.40894
	44.9062	-0.39063		44.875	-0.354		44.75	-0.41504		45	-0.48828
	45	-0.36621		45	-0.37231		45	-0.38452		45	-0.48828
	45.1094	-0.39673		45	-0.37231		45	-0.38452		45	-0.47607
	45.2031	-0.38452		45.125	-0.39063		45	-0.3479		45.25	-0.45776
	45.3125	-0.38452		45.25	-0.36621		45.25	-0.31738		45.25	-0.48828
	45.4062	-0.40894		45.375	-0.43945		45.25	-0.3479		45.5	-0.43335
	45.5	-0.37842		45.5	-0.39673		45.5	-0.3479		45.5	-0.42114
	45.6094	-0.38452		45.5	-0.37842		45.5	-0.31128		45.5	-0.43335
	45.7031	-0.38452		45.625	-0.39673		45.5	-0.32959		45.75	-0.39063
	45.8125	-0.40283		45.75	-0.354		45.75	-0.27466		45.75	-0.44556
	45.9062	-0.39063		45.875	-0.354		45.75	-0.30518		46	-0.39673
	46	-0.39063		46	-0.354		46	-0.31128		46	-0.40894
	46.1094	-0.3479		46	-0.36621		46	-0.29297		46	-0.39063
	46.2031	-0.37842		46.125	-0.36621		46	-0.28076		46.25	-0.39063
	46.3125	-0.354		46.25	-0.41504		46.25	-0.33569		46.25	-0.39063
	46.4062	-0.32959		46.375	-0.32959		46.25	-0.33569		46.5	-0.42114
	46.5	-0.37842		46.5	-0.36621		46.5	-0.33569		46.5	-0.37842
	46.6094	-0.3418		46.5	-0.37842		46.5	-0.3418		46.5	-0.39063
	46.7031	-0.3479		46.625	-0.3418		46.5	-0.33569		46.75	-0.42725
	46.8125	-0.33569		46.75	-0.39673		46.75	-0.36621		46.75	-0.36011
	46.9062	-0.37231		46.875	-0.36621		46.75	-0.32959		47	-0.36621
	47	-0.36011		47	-0.36011		47	-0.33569		47	-0.36011
	47.1094	-0.42114		47	-0.36621		47	-0.32959		47	-0.36621
	47.2031	-0.38452		47.125	-0.40894		47	-0.3479		47.25	-0.36011
	47.3125	-0.38452		47.25	-0.38452		47.25	-0.37842		47.25	-0.3479
	47.4062	-0.43335		47.375	-0.42114		47.25	-0.3418		47.5	-0.32959
	47.5	-0.39673		47.5	-0.40283		47.5	-0.36011		47.5	-0.32959
	47.6094	-0.40283		47.5	-0.40283		47.5	-0.36011		47.5	-0.37842
	47.7031	-0.40283		47.625	-0.45166		47.5	-0.40283		47.75	-0.354
	47.8125	-0.39673		47.75	-0.43945		47.75	-0.37231		47.75	-0.39063
	47.9062	-0.40894		47.875	-0.44556		47.75	-0.36011		48	-0.354
	48	-0.42725		48	-0.42725		48	-0.33569		48	-0.36621
	48.1094	-0.37842		48	-0.46997		48	-0.36621		48	-0.36621
	48.2031	-0.41504		48.125	-0.44556		48	-0.36621		48.25	-0.3479
	48.3125	-0.45166		48.25	-0.48828		48.25	-0.3479		48.25	-0.33569
	48.4062	-0.41504		48.375	-0.42114		48.25	-0.40283		48.5	-0.3418
	48.5	-0.48218		48.5	-0.46997		48.5	-0.3479		48.5	-0.37231
	48.6094	-0.43945		48.5	-0.46997		48.5	-0.36011		48.5	-0.32959
	48.7031	-0.42725		48.625	-0.45776		48.5	-0.39063		48.75	-0.37842
	48.8125	-0.43945		48.75	-0.46997		48.75	-0.41504		48.75	-0.37231
	48.9062	-0.46997		48.875	-0.48218		48.75	-0.40894		49	-0.38452
	49	-0.42725		49	-0.45776		49	-0.43945		49	-0.36621
	49.1094	-0.43945		49	-0.46997		49	-0.40894		49	-0.39673
	49.2031	-0.43945		49.125	-0.47607		49	-0.40894		49.25	-0.36621
	49.3125	-0.43335		49.25	-0.42725		49.25	-0.44556		49.25	-0.36011
	49.4062	-0.46997		49.375	-0.42725		49.25	-0.40283		49.5	-0.39673
	49.5	-0.42114		49.5	-0.42725		49.5	-0.41504		49.5	-0.36011
	49.6094	-0.44556		49.5	-0.43335		49.5	-0.39063		49.5	-0.39673
	49.7031	-0.44556		49.625	-0.43945		49.5	-0.38452		49.75	-0.39063
	49.8125	-0.44556		49.75	-0.40283		49.75	-0.40283		49.75	-0.40894
	49.9062	-0.46997		49.875	-0.42725		49.75	-0.43335		50	-0.37842
	50	-0.46997		50	-0.40894		50	-0.40283		50	-0.39063
	50.1094	-0.45166		50	-0.40894		50	-0.42725		50	-0.354
	50.2031	-0.44556		50.125	-0.37842		50	-0.42114		50.25	-0.36621
	50.3125	-0.46997		50.25	-0.39673		50.25	-0.36011		50.25	-0.39063
	50.4062	-0.44556		50.375	-0.39063		50.25	-0.40894		50.5	-0.41504
	50.5	-0.42725		50.5	-0.39063		50.5	-0.39063		50.5	-0.48218
	50.6094	-0.40894		50.5	-0.40283		50.5	-0.38452		50.5	-0.45166
	50.7031	-0.40894		50.625	-0.37231		50.5	-0.39673		50.75	-0.40283
	50.8125	-0.36621		50.75	-0.40283		50.75	-0.40283		50.75	-0.42114
	50.9062	-0.38452		50.875	-0.37842		50.75	-0.40894		51	-0.40283
	51	-0.39673		51	-0.42725		51	-0.45166		51	-0.40283
	51.1094	-0.38452		51	-0.36011		51	-0.39673		51	-0.46387
	51.2031	-0.40283		51.125	-0.354		51	-0.354		51.25	-0.45166
	51.3125	-0.39063		51.25	-0.354		51.25	-0.37842		51.25	-0.42725
	51.4062	-0.41504		51.375	-0.354		51.25	-0.3479		51.5	-0.45166
	51.5	-0.37231		51.5	-0.37842		51.5	-0.39673		51.5	-0.40283
	51.6094	-0.40894		51.5	-0.32959		51.5	-0.39063		51.5	-0.45166
	51.7031	-0.39673		51.625	-0.354		51.5	-0.37231		51.75	-0.43335
	51.8125	-0.39063		51.75	-0.33569		51.75	-0.38452		51.75	-0.40894
	51.9062	-0.37842		51.875	-0.38452		51.75	-0.42114		52	-0.41504
	52	-0.36621		52	-0.3418		52	-0.39063		52	-0.42725
	52.1094	-0.40894		52	-0.3479		52	-0.41504		52	-0.39673
	52.2031	-0.37842		52.125	-0.354		52	-0.43945		52.25	-0.40894
	52.3125	-0.39673		52.25	-0.3479		52.25	-0.38452		52.25	-0.44556
	52.4062	-0.39063		52.375	-0.38452		52.25	-0.42114		52.5	-0.38452
	52.5	-0.37842		52.5	-0.354		52.5	-0.37231		52.5	-0.45776
	52.6094	-0.3418		52.5	-0.36011		52.5	-0.36621		52.5	-0.42114
	52.7031	-0.38452		52.625	-0.354		52.5	-0.3418		52.75	-0.40283
	52.8125	-0.33569		52.75	-0.36011		52.75	-0.36011		52.75	-0.41504
	52.9062	-0.32349		52.875	-0.29907		52.75	-0.36621		53	-0.40894
	53	-0.40283		53	-0.3479		53	-0.37231		53	-0.40894
	53.1094	-0.38452		53	-0.3418		53	-0.37842		53	-0.43335
	53.2031	-0.39673		53.125	-0.33569		53	-0.38452		53.25	-0.42114
	53.3125	-0.39673		53.25	-0.39673		53.25	-0.42114		53.25	-0.39673
	53.4062	-0.38452		53.375	-0.38452		53.25	-0.41504		53.5	-0.43335
	53.5	-0.39063		53.5	-0.40894		53.5	-0.40283		53.5	-0.36621
	53.6094	-0.42725		53.5	-0.41504		53.5	-0.41504		53.5	-0.41504
	53.7031	-0.37231		53.625	-0.41504		53.5	-0.39063		53.75	-0.39673
	53.8125	-0.36621		53.75	-0.39063		53.75	-0.39673		53.75	-0.37231
	53.9062	-0.37231		53.875	-0.40894		53.75	-0.38452		54	-0.39063
	54	-0.3479		54	-0.36621		54	-0.38452		54	-0.39673
	54.1094	-0.40894		54	-0.40894		54	-0.36011		54	-0.37231
	54.2031	-0.41504		54.125	-0.42725		54	-0.39063		54.25	-0.3479
	54.3125	-0.40894		54.25	-0.39063		54.25	-0.36621		54.25	-0.38452
	54.4062	-0.40894		54.375	-0.43945		54.25	-0.38452		54.5	-0.3479
	54.5	-0.44556		54.5	-0.42114		54.5	-0.39673		54.5	-0.39673
	54.6094	-0.38452		54.5	-0.40894		54.5	-0.41504		54.5	-0.39063
	54.7031	-0.41504		54.625	-0.41504		54.5	-0.38452		54.75	-0.3479
	54.8125	-0.41504		54.75	-0.41504		54.75	-0.39063		54.75	-0.36011
	54.9062	-0.37842		54.875	-0.37231		54.75	-0.42114		55	-0.3479
	55	-0.42114		55	-0.40894		55	-0.37842		55	-0.36011
	55.1094	-0.39063		55	-0.40283		55	-0.41504		55	-0.3479
	55.2031	-0.41504		55.125	-0.39673		55	-0.37231		55.25	-0.36011
	55.3125	-0.40283		55.25	-0.42725		55.25	-0.41504		55.25	-0.354
	55.4062	-0.40283		55.375	-0.38452		55.25	-0.44556		55.5	-0.40894
	55.5	-0.38452		55.5	-0.39673		55.5	-0.45166		55.5	-0.39673
	55.6094	-0.40894		55.5	-0.38452		55.5	-0.43335		55.5	-0.39063
	55.7031	-0.42114		55.625	-0.37842		55.5	-0.44556		55.75	-0.38452
	55.8125	-0.40283		55.75	-0.36011		55.75	-0.43945		55.75	-0.39063
	55.9062	-0.46997		55.875	-0.39063		55.75	-0.40894		56	-0.38452
	56	-0.43945		56	-0.36621		56	-0.46997		56	-0.36011
	56.1094	-0.44556		56	-0.40283		56	-0.43945		56	-0.40894
	56.2031	-0.44556		56.125	-0.46387		56	-0.46997		56.25	-0.354
	56.3125	-0.43945		56.25	-0.42114		56.25	-0.47607		56.25	-0.38452
	56.4062	-0.40894		56.375	-0.45166		56.25	-0.45776		56.5	-0.39063
	56.5	-0.44556		56.5	-0.42725		56.5	-0.45776		56.5	-0.41504
	56.6094	-0.42725		56.5	-0.42725		56.5	-0.49438		56.5	-0.41504
	56.7031	-0.44556		56.625	-0.41504		56.5	-0.45166		56.75	-0.43335
	56.8125	-0.43335		56.75	-0.41504		56.75	-0.42725		56.75	-0.43945
	56.9062	-0.42114		56.875	-0.41504		56.75	-0.46387		57	-0.43335
	57	-0.40894		57	-0.42114		57	-0.42114		57	-0.47607
	57.1094	-0.40894		57	-0.40283		57	-0.47607		57	-0.43945
	57.2031	-0.40283		57.125	-0.39673		57	-0.43335		57.25	-0.47607
	57.3125	-0.39063		57.25	-0.44556		57.25	-0.41504		57.25	-0.43945
	57.4062	-0.40283		57.375	-0.41504		57.25	-0.43945		57.5	-0.42725
	57.5	-0.39673		57.5	-0.42114		57.5	-0.42114		57.5	-0.43335
	57.6094	-0.38452		57.5	-0.39673		57.5	-0.39063		57.5	-0.42114
	57.7031	-0.39673		57.625	-0.37231		57.5	-0.42114		57.75	-0.44556
	57.8125	-0.37231		57.75	-0.3479		57.75	-0.46387		57.75	-0.46997
	57.9062	-0.37231		57.875	-0.354		57.75	-0.43945		58	-0.44556
	58	-0.354		58	-0.36621		58	-0.47607		58	-0.41504
	58.1094	-0.37842		58	-0.3479		58	-0.41504		58	-0.47607
	58.2031	-0.36011		58.125	-0.3479		58	-0.43335		58.25	-0.43335
	58.3125	-0.38452		58.25	-0.38452		58.25	-0.42725		58.25	-0.45776
	58.4062	-0.31738		58.375	-0.36011		58.25	-0.36011		58.5	-0.44556
	58.5	-0.31738		58.5	-0.354		58.5	-0.37842		58.5	-0.43335
	58.6094	-0.36011		58.5	-0.37231		58.5	-0.38452		58.5	-0.43945
	58.7031	-0.32349		58.625	-0.3479		58.5	-0.37231		58.75	-0.48828
	58.8125	-0.354		58.75	-0.354		58.75	-0.37842		58.75	-0.44556
	58.9062	-0.37842		58.875	-0.38452		58.75	-0.43945		59	-0.47607
	59	-0.39063		59	-0.37231		59	-0.38452		59	-0.47607
	59.1094	-0.32349		59	-0.40283		59	-0.41504		59	-0.43335
	59.2031	-0.3479		59.125	-0.42114		59	-0.37842		59.25	-0.42725
	59.3125	-0.31738		59.25	-0.40283		59.25	-0.36621		59.25	-0.39673
	59.4062	-0.354		59.375	-0.37231		59.25	-0.39063		59.5	-0.38452
	59.5	-0.37231		59.5	-0.40894		59.5	-0.38452		59.5	-0.42114
	59.6094	-0.31128		59.5	-0.39673		59.5	-0.40283		59.5	-0.41504
	59.7031	-0.36621		59.625	-0.43335		59.5	-0.41504		59.75	-0.40283
	59.8125	-0.32959		59.75	-0.42725		59.75	-0.42114		59.75	-0.42114
	59.9062	-0.33569		59.875	-0.38452		59.75	-0.37231		60	-0.40283
	60	-0.3479		60	-0.46387		60	-0.39063		60	-0.3418
	60.1094	-0.37231		60	-0.43335		60	-0.36011		60	-0.39673
	60.2031	-0.32349		60.125	-0.42114		60	-0.354		60.25	-0.3479
	60.3125	-0.37231		60.25	-0.42114		60.25	-0.37842		60.25	-0.39673
	60.4062	-0.39063		60.375	-0.44556		60.25	-0.36621		60.5	-0.36621
	60.5	-0.36011		60.5	-0.40894		60.5	-0.38452		60.5	-0.3418
	60.6094	-0.40283		60.5	-0.44556		60.5	-0.37842		60.5	-0.41504
	60.7031	-0.39063		60.625	-0.41504		60.5	-0.37842		60.75	-0.40283
	60.8125	-0.40894		60.75	-0.39673		60.75	-0.37842		60.75	-0.38452
	60.9062	-0.40894		60.875	-0.45166		60.75	-0.41504		61	-0.38452
	61	-0.42114		61	-0.39673		61	-0.36621		61	-0.43945
	61.1094	-0.40894		61	-0.44556		61	-0.37842		61	-0.36621
	61.2031	-0.44556		61.125	-0.46997		61	-0.36011		61.25	-0.36621
	61.3125	-0.39673		61.25	-0.47607		61.25	-0.39063		61.25	-0.3479
	61.4062	-0.39063		61.375	-0.46387		61.25	-0.39673		61.5	-0.32349
	61.5	-0.40283		61.5	-0.48218		61.5	-0.40283		61.5	-0.37842
	61.6094	-0.36621		61.5	-0.42725		61.5	-0.39673		61.5	-0.354
	61.7031	-0.40894		61.625	-0.45166		61.5	-0.40283		61.75	-0.36011
	61.8125	-0.41504		61.75	-0.50049		61.75	-0.39673		61.75	-0.3479
	61.9062	-0.40894		61.875	-0.46997		61.75	-0.39673		62	-0.39673
	62	-0.41504		62	-0.50659		62	-0.40283		62	-0.36621
	62.1094	-0.45166		62	-0.46387		62	-0.40283		62	-0.39673
	62.2031	-0.39673		62.125	-0.44556		62	-0.42725		62.25	-0.37231
	62.3125	-0.40894		62.25	-0.44556		62.25	-0.41504		62.25	-0.39673
	62.4062	-0.41504		62.375	-0.44556		62.25	-0.42114		62.5	-0.42725
	62.5	-0.36621		62.5	-0.40283		62.5	-0.45166		62.5	-0.39063
	62.6094	-0.40894		62.5	-0.43335		62.5	-0.44556		62.5	-0.41504
	62.7031	-0.39673		62.625	-0.45776		62.5	-0.46387		62.75	-0.40283
	62.8125	-0.40894		62.75	-0.45166		62.75	-0.40283		62.75	-0.42114
	62.9062	-0.39063		62.875	-0.48218		62.75	-0.39673		63	-0.39063
	63	-0.42114		63	-0.43945		63	-0.38452		63	-0.38452
	63.1094	-0.40894		63	-0.46387		63	-0.40894		63	-0.36621
	63.2031	-0.42114		63.125	-0.46387		63	-0.39673		63.25	-0.36011
	63.3125	-0.42725		63.25	-0.43335		63.25	-0.41504		63.25	-0.36621
	63.4062	-0.41504		63.375	-0.41504		63.25	-0.43335		63.5	-0.37842
	63.5	-0.43335		63.5	-0.44556		63.5	-0.40283		63.5	-0.41504
	63.6094	-0.38452		63.5	-0.42114		63.5	-0.43945		63.5	-0.37842
	63.7031	-0.40283		63.625	-0.37842		63.5	-0.39063		63.75	-0.43945
	63.8125	-0.36011		63.75	-0.42114		63.75	-0.43335		63.75	-0.43335
	63.9062	-0.38452		63.875	-0.39063		63.75	-0.42114		64	-0.43335
	64	-0.36621		64	-0.41504		64	-0.36011		64	-0.41504
	64.1094	-0.38452		64	-0.37842		64	-0.37231		64	-0.43945
	64.2031	-0.40283		64.125	-0.37231		64	-0.36621		64.25	-0.42114
	64.3125	-0.37231		64.25	-0.3418		64.25	-0.39063		64.25	-0.40894
	64.4062	-0.40283		64.375	-0.3479		64.25	-0.39673		64.5	-0.40894
	64.5	-0.40283		64.5	-0.36011		64.5	-0.43335		64.5	-0.40283
	64.6094	-0.41504		64.5	-0.354		64.5	-0.38452		64.5	-0.40894
	64.7031	-0.38452		64.625	-0.37842		64.5	-0.44556		64.75	-0.38452
	64.8125	-0.42114		64.75	-0.37842		64.75	-0.40283		64.75	-0.43945
	64.9062	-0.40283		64.875	-0.39063		64.75	-0.37842		65	-0.41504
	65	-0.39063		65	-0.37842		65	-0.39673		65	-0.42725
	65.1094	-0.40283		65	-0.40283		65	-0.38452		65	-0.43945
	65.2031	-0.36621		65.125	-0.354		65	-0.36011		65.25	-0.42114
	65.3125	-0.39673		65.25	-0.39063		65.25	-0.37231		65.25	-0.41504
	65.4062	-0.37231		65.375	-0.354		65.25	-0.354		65.5	-0.42114
	65.5	-0.37231		65.5	-0.36621		65.5	-0.36011		65.5	-0.43945
	65.6094	-0.36621		65.5	-0.40283		65.5	-0.39673		65.5	-0.40894
	65.7031	-0.38452		65.625	-0.39063		65.5	-0.33569		65.75	-0.45166
	65.8125	-0.3479		65.75	-0.37842		65.75	-0.3479		65.75	-0.40894
	65.9062	-0.38452		65.875	-0.40283		65.75	-0.3479		66	-0.45166
	66	-0.36011		66	-0.37231		66	-0.32349		66	-0.42114
	66.1094	-0.32349		66	-0.3418		66	-0.37231		66	-0.38452
	66.2031	-0.40283		66.125	-0.36011		66	-0.36011		66.25	-0.40283
	66.3125	-0.39063		66.25	-0.32349		66.25	-0.3479		66.25	-0.39673
	66.4062	-0.36011		66.375	-0.29907		66.25	-0.36621		66.5	-0.40894
	66.5	-0.39063		66.5	-0.3418		66.5	-0.42114		66.5	-0.39673
	66.6094	-0.38452		66.5	-0.3418		66.5	-0.36621		66.5	-0.40894
	66.7031	-0.40283		66.625	-0.37842		66.5	-0.38452		66.75	-0.354
	66.8125	-0.39673		66.75	-0.36011		66.75	-0.36011		66.75	-0.39673
	66.9062	-0.36621		66.875	-0.36011		66.75	-0.36011		67	-0.3418
	67	-0.38452		67	-0.37231		67	-0.37842		67	-0.3479
	67.1094	-0.43335		67	-0.37842		67	-0.36011		67	-0.40283
	67.2031	-0.39063		67.125	-0.3418		67	-0.39673		67.25	-0.37231
	67.3125	-0.40894		67.25	-0.41504		67.25	-0.40283		67.25	-0.39063
	67.4062	-0.39063		67.375	-0.42114		67.25	-0.39673		67.5	-0.38452
	67.5	-0.38452		67.5	-0.39063		67.5	-0.36621		67.5	-0.3479
	67.6094	-0.39063		67.5	-0.44556		67.5	-0.40894		67.5	-0.37231
	67.7031	-0.41504		67.625	-0.40283		67.5	-0.36011		67.75	-0.36621
	67.8125	-0.38452		67.75	-0.40894		67.75	-0.36621		67.75	-0.3479
	67.9062	-0.44556		67.875	-0.42114		67.75	-0.39673		68	-0.38452
	68	-0.46387		68	-0.44556		68	-0.36621		68	-0.36621
	68.1094	-0.41504		68	-0.40894		68	-0.37842		68	-0.31128
	68.2031	-0.45166		68.125	-0.41504		68	-0.36621		68.25	-0.354
	68.3125	-0.43335		68.25	-0.39063		68.25	-0.39673		68.25	-0.36011
	68.4062	-0.43945		68.375	-0.37231		68.25	-0.37842		68.5	-0.3479
	68.5	-0.43945		68.5	-0.45776		68.5	-0.42725		68.5	-0.33569
	68.6094	-0.48218		68.5	-0.40283		68.5	-0.40894		68.5	-0.354
	68.7031	-0.47607		68.625	-0.45166		68.5	-0.41504		68.75	-0.3479
	68.8125	-0.48218		68.75	-0.40894		68.75	-0.40894		68.75	-0.37842
	68.9062	-0.47607		68.875	-0.37842		68.75	-0.40894		69	-0.36011
	69	-0.45166		69	-0.38452		69	-0.40283		69	-0.39063
	69.1094	-0.46997		69	-0.43335		69	-0.39063		69	-0.44556
	69.2031	-0.42725		69.125	-0.40283		69	-0.40894		69.25	-0.39063
	69.3125	-0.45776		69.25	-0.42114		69.25	-0.37231		69.25	-0.40283
	69.4062	-0.47607		69.375	-0.44556		69.25	-0.41504		69.5	-0.37231
	69.5	-0.44556		69.5	-0.38452		69.5	-0.39673		69.5	-0.36621
	69.6094	-0.41504		69.5	-0.42725		69.5	-0.39673		69.5	-0.36621
	69.7031	-0.43945		69.625	-0.40894		69.5	-0.40894		69.75	-0.40283
	69.8125	-0.44556		69.75	-0.38452		69.75	-0.40894		69.75	-0.37842
	69.9062	-0.42725		69.875	-0.37231		69.75	-0.43335		70	-0.39673
	70	-0.44556		70	-0.37231		70	-0.45166		70	-0.40283
	70.1094	-0.42114		70	-0.37231		70	-0.42114		70	-0.37231
	70.2031	-0.43335		70.125	-0.38452		70	-0.40283		70.25	-0.40283
	70.3125	-0.40894		70.25	-0.40894		70.25	-0.41504		70.25	-0.37842
	70.4062	-0.43335		70.375	-0.37231		70.25	-0.40894		70.5	-0.42114
	70.5	-0.39673		70.5	-0.39063		70.5	-0.38452		70.5	-0.39673
	70.6094	-0.40283		70.5	-0.37842		70.5	-0.40894		70.5	-0.40894
	70.7031	-0.43335		70.625	-0.38452		70.5	-0.39673		70.75	-0.37842
	70.8125	-0.41504		70.75	-0.39063		70.75	-0.40894		70.75	-0.39673
	70.9062	-0.39063		70.875	-0.39673		70.75	-0.42114		71	-0.42114
	71	-0.36011		71	-0.37231		71	-0.40894		71	-0.40283
	71.1094	-0.38452		71	-0.36621		71	-0.40283		71	-0.45166
	71.2031	-0.39673		71.125	-0.37231		71	-0.41504		71.25	-0.43335
	71.3125	-0.42114		71.25	-0.3479		71.25	-0.37231		71.25	-0.45166
	71.4062	-0.38452		71.375	-0.36621		71.25	-0.43335		71.5	-0.42725
	71.5	-0.40894		71.5	-0.354		71.5	-0.39063		71.5	-0.47607
	71.6094	-0.37231		71.5	-0.36621		71.5	-0.37842		71.5	-0.45166
	71.7031	-0.3418		71.625	-0.31738		71.5	-0.43335		71.75	-0.41504
	71.8125	-0.36011		71.75	-0.36011		71.75	-0.42114		71.75	-0.43945
	71.9062	-0.354		71.875	-0.3479		71.75	-0.41504		72	-0.40894
	72	-0.36011		72	-0.36011		72	-0.39673		72	-0.42114
	72.1094	-0.37231		72	-0.36011		72	-0.40894		72	-0.43335
	72.2031	-0.39673		72.125	-0.32959		72	-0.39063		72.25	-0.43335
	72.3125	-0.354		72.25	-0.36621		72.25	-0.45166		72.25	-0.39673
	72.4062	-0.39673		72.375	-0.354		72.25	-0.39673		72.5	-0.40283
	72.5	-0.37842		72.5	-0.36621		72.5	-0.40894		72.5	-0.39063
	72.6094	-0.40283		72.5	-0.36621		72.5	-0.42114		72.5	-0.38452
	72.7031	-0.41504		72.625	-0.38452		72.5	-0.36621		72.75	-0.40283
	72.8125	-0.39673		72.75	-0.37842		72.75	-0.40283		72.75	-0.36011
	72.9062	-0.39673		72.875	-0.40894		72.75	-0.37842		73	-0.39673
	73	-0.40283		73	-0.37842		73	-0.37231		73	-0.3479
	73.1094	-0.38452		73	-0.354		73	-0.3418		73	-0.38452
	73.2031	-0.37231		73.125	-0.37842		73	-0.354		73.25	-0.38452
	73.3125	-0.41504		73.25	-0.36011		73.25	-0.33569		73.25	-0.39673
	73.4062	-0.39063		73.375	-0.37231		73.25	-0.38452		73.5	-0.37842
	73.5	-0.42114		73.5	-0.38452		73.5	-0.38452		73.5	-0.40894
	73.6094	-0.40894		73.5	-0.40283		73.5	-0.31738		73.5	-0.38452
	73.7031	-0.37231		73.625	-0.36621		73.5	-0.36011		73.75	-0.39673
	73.8125	-0.37842		73.75	-0.40283		73.75	-0.33569		73.75	-0.44556
	73.9062	-0.40283		73.875	-0.39063		73.75	-0.32349		74	-0.39673
	74	-0.3479		74	-0.38452		74	-0.30518		74	-0.39063
	74.1094	-0.37842		74	-0.39673		74	-0.33569		74	-0.37842
	74.2031	-0.39673		74.125	-0.3418		74	-0.36011		74.25	-0.36011
	74.3125	-0.36011		74.25	-0.39673		74.25	-0.40283		74.25	-0.36621
	74.4062	-0.39673		74.375	-0.39063		74.25	-0.37231		74.5	-0.39673
	74.5	-0.40283		74.5	-0.354		74.5	-0.37842		74.5	-0.36011
	74.6094	-0.36621		74.5	-0.40283		74.5	-0.43945		74.5	-0.38452
	74.7031	-0.37231		74.625	-0.43945		74.5	-0.39063		74.75	-0.43335
	74.8125	-0.3479		74.75	-0.42114		74.75	-0.42114		74.75	-0.39673
	74.9062	-0.39063		74.875	-0.43945		74.75	-0.42725		75	-0.41504
	75	-0.38452		75	-0.42114		75	-0.42114		75	-0.39063
	75.1094	-0.41504		75	-0.36621		75	-0.40283		75	-0.37231
	75.2031	-0.42114		75.125	-0.42725		75	-0.40283		75.25	-0.36011
	75.3125	-0.44556		75.25	-0.40894		75.25	-0.37842		75.25	-0.39063
	75.4062	-0.41504		75.375	-0.40283		75.25	-0.42114		75.5	-0.36011
	75.5	-0.40894		75.5	-0.40894		75.5	-0.43945		75.5	-0.40283
	75.6094	-0.43945		75.5	-0.40283		75.5	-0.43335		75.5	-0.38452
	75.7031	-0.41504		75.625	-0.39063		75.5	-0.44556		75.75	-0.36011
	75.8125	-0.43335		75.75	-0.42114		75.75	-0.45166		75.75	-0.36011
	75.9062	-0.42114		75.875	-0.40894		75.75	-0.50049		76	-0.36011
	76	-0.45776		76	-0.40283		76	-0.46387		76	-0.37231
	76.1094	-0.43335		76	-0.43335		76	-0.45166		76	-0.40894
	76.2031	-0.45166		76.125	-0.38452		76	-0.43945		76.25	-0.38452
	76.3125	-0.45776		76.25	-0.43945		76.25	-0.45166		76.25	-0.37842
	76.4062	-0.43335		76.375	-0.46387		76.25	-0.45166		76.5	-0.42725
	76.5	-0.45776		76.5	-0.43945		76.5	-0.42114		76.5	-0.42114
	76.6094	-0.44556		76.5	-0.42725		76.5	-0.42725		76.5	-0.41504
	76.7031	-0.46387		76.625	-0.44556		76.5	-0.41504		76.75	-0.45166
	76.8125	-0.39063		76.75	-0.43945		76.75	-0.42114		76.75	-0.40283
	76.9062	-0.42725		76.875	-0.41504		76.75	-0.40283		77	-0.44556
	77	-0.40894		77	-0.45166		77	-0.43335		77	-0.44556
	77.1094	-0.43945		77	-0.40894		77	-0.42114		77	-0.44556
	77.2031	-0.42114		77.125	-0.43335		77	-0.42725		77.25	-0.42114
	77.3125	-0.40283		77.25	-0.40283		77.25	-0.42725		77.25	-0.42725
	77.4062	-0.42725		77.375	-0.41504		77.25	-0.39063		77.5	-0.43945
	77.5	-0.39673		77.5	-0.38452		77.5	-0.42114		77.5	-0.45166
	77.6094	-0.39673		77.5	-0.354		77.5	-0.46387		77.5	-0.47607
	77.7031	-0.39673		77.625	-0.36011		77.5	-0.43335		77.75	-0.45776
	77.8125	-0.39063		77.75	-0.38452		77.75	-0.37842		77.75	-0.48828
	77.9062	-0.3418		77.875	-0.37842		77.75	-0.42725		78	-0.45776
	78	-0.37842		78	-0.354		78	-0.36621		78	-0.46387
	78.1094	-0.3418		78	-0.38452		78	-0.42114		78	-0.43335
	78.2031	-0.32959		78.125	-0.36621		78	-0.43335		78.25	-0.45776
	78.3125	-0.36621		78.25	-0.36621		78.25	-0.40894		78.25	-0.45776
	78.4062	-0.3479		78.375	-0.3479		78.25	-0.42114		78.5	-0.46997
	78.5	-0.354		78.5	-0.36011		78.5	-0.38452		78.5	-0.5127
	78.6094	-0.354		78.5	-0.3479		78.5	-0.3479		78.5	-0.45776
	78.7031	-0.3418		78.625	-0.3418		78.5	-0.37231		78.75	-0.48828
	78.8125	-0.32959		78.75	-0.39063		78.75	-0.38452		78.75	-0.47607
	78.9062	-0.36621		78.875	-0.36011		78.75	-0.39063		79	-0.45776
	79	-0.32959		79	-0.36621		79	-0.40894		79	-0.42725
	79.1094	-0.36621		79	-0.36621		79	-0.36621		79	-0.46997
	79.2031	-0.36011		79.125	-0.37231		79	-0.36011		79.25	-0.43945
	79.3125	-0.31128		79.25	-0.37231		79.25	-0.39673		79.25	-0.42114
	79.4062	-0.37231		79.375	-0.37231		79.25	-0.37231		79.5	-0.44556
	79.5	-0.354		79.5	-0.354		79.5	-0.39673		79.5	-0.40894
	79.6094	-0.3479		79.5	-0.37842		79.5	-0.38452		79.5	-0.42114
	79.7031	-0.3418		79.625	-0.40894		79.5	-0.36011		79.75	-0.40894
	79.8125	-0.38452		79.75	-0.37231		79.75	-0.36621		79.75	-0.41504
	79.9062	-0.33569		79.875	-0.42114		79.75	-0.40283		80	-0.38452
	80	-0.36621		80	-0.36621		80	-0.32959		80	-0.39673
	80.1094	-0.354		80	-0.3418		80	-0.36011		80	-0.37231
	80.2031	-0.3418		80.125	-0.36621		80	-0.40894		80.25	-0.39673
	80.3125	-0.38452		80.25	-0.36621		80.25	-0.37231		80.25	-0.38452
	80.4062	-0.37842		80.375	-0.36011		80.25	-0.43335		80.5	-0.3479
	80.5	-0.41504		80.5	-0.41504		80.5	-0.43335		80.5	-0.42114
	80.6094	-0.39063		80.5	-0.43335		80.5	-0.43335		80.5	-0.37231
	80.7031	-0.38452		80.625	-0.40894		80.5	-0.43945		80.75	-0.37842
	80.8125	-0.36621		80.75	-0.48218		80.75	-0.42725		80.75	-0.40894
	80.9062	-0.39673		80.875	-0.44556		80.75	-0.37842		81	-0.41504
	81	-0.36621		81	-0.45776		81	-0.42114		81	-0.38452
	81.1094	-0.37842		81	-0.46387		81	-0.43945		81	-0.42114
	81.2031	-0.43335		81.125	-0.43945		81	-0.40283		81.25	-0.38452
	81.3125	-0.40283		81.25	-0.46387		81.25	-0.43945		81.25	-0.36621
	81.4062	-0.42725		81.375	-0.50049		81.25	-0.37842		81.5	-0.39673
	81.5	-0.41504		81.5	-0.48828		81.5	-0.42114		81.5	-0.3418
	81.6094	-0.42725		81.5	-0.50659		81.5	-0.41504		81.5	-0.39063
	81.7031	-0.40283		81.625	-0.5127		81.5	-0.40283		81.75	-0.39673
	81.8125	-0.39063		81.75	-0.44556		81.75	-0.39063		81.75	-0.37231
	81.9062	-0.38452		81.875	-0.50659		81.75	-0.40894		82	-0.40283
	82	-0.40283		82	-0.50659		82	-0.39063		82	-0.42114
	82.1094	-0.42114		82	-0.49438		82	-0.39673		82	-0.40283
	82.2031	-0.41504		82.125	-0.5249		82	-0.43335		82.25	-0.44556
	82.3125	-0.40894		82.25	-0.54932		82.25	-0.38452		82.25	-0.47607
	82.4062	-0.37842		82.375	-0.49438		82.25	-0.42114		82.5	-0.39673
	82.5	-0.40894		82.5	-0.5188		82.5	-0.42114		82.5	-0.43945
	82.6094	-0.39673		82.5	-0.47607		82.5	-0.42725		82.5	-0.40283
	82.7031	-0.43335		82.625	-0.42725		82.5	-0.41504		82.75	-0.41504
	82.8125	-0.40283		82.75	-0.46387		82.75	-0.40894		82.75	-0.41504
	82.9062	-0.42114		82.875	-0.45166		82.75	-0.39673		83	-0.40894
	83	-0.43335		83	-0.41504		83	-0.41504		83	-0.39673
	83.1094	-0.43335		83	-0.40283		83	-0.45776		83	-0.43335
	83.2031	-0.43945		83.125	-0.37842		83	-0.43945		83.25	-0.43945
	83.3125	-0.45776		83.25	-0.39063		83.25	-0.47607		83.25	-0.40283
	83.4062	-0.42114		83.375	-0.40894		83.25	-0.43945		83.5	-0.43945
	83.5	-0.39673		83.5	-0.40283		83.5	-0.45166		83.5	-0.39673
	83.6094	-0.39063		83.5	-0.39063		83.5	-0.45166		83.5	-0.42725
	83.7031	-0.39063		83.625	-0.43945		83.5	-0.46387		83.75	-0.43945
	83.8125	-0.37842		83.75	-0.39673		83.75	-0.42725		83.75	-0.43945
	83.9062	-0.43335		83.875	-0.42725		83.75	-0.43945		84	-0.45166
	84	-0.42725		84	-0.43945		84	-0.45776		84	-0.45166
	84.1094	-0.41504		84	-0.40894		84	-0.40283		84	-0.42114
	84.2031	-0.40283		84.125	-0.40283		84	-0.41504		84.25	-0.41504
	84.3125	-0.39673		84.25	-0.40894		84.25	-0.40894		84.25	-0.43945
	84.4062	-0.37231		84.375	-0.40894		84.25	-0.40894		84.5	-0.42725
	84.5	-0.40894		84.5	-0.37231		84.5	-0.38452		84.5	-0.43945
	84.6094	-0.37231		84.5	-0.40283		84.5	-0.40283		84.5	-0.46387
	84.7031	-0.37842		84.625	-0.36621		84.5	-0.37842		84.75	-0.46387
	84.8125	-0.38452		84.75	-0.36621		84.75	-0.39063		84.75	-0.43335
	84.9062	-0.36011		84.875	-0.32959		84.75	-0.42114		85	-0.41504
	85	-0.39673		85	-0.32349		85	-0.39673		85	-0.41504
	85.1094	-0.39673		85	-0.3418		85	-0.42725		85	-0.40283
	85.2031	-0.38452		85.125	-0.31738		85	-0.37842		85.25	-0.40283
	85.3125	-0.39673		85.25	-0.36011		85.25	-0.3479		85.25	-0.39673
	85.4062	-0.42114		85.375	-0.3479		85.25	-0.32959		85.5	-0.44556
	85.5	-0.37231		85.5	-0.39673		85.5	-0.3479		85.5	-0.41504
	85.6094	-0.39673		85.5	-0.3418		85.5	-0.32349		85.5	-0.43335
	85.7031	-0.39063		85.625	-0.37231		85.5	-0.36011		85.75	-0.40283
	85.8125	-0.354		85.75	-0.38452		85.75	-0.3479		85.75	-0.40283
	85.9062	-0.36621		85.875	-0.37842		85.75	-0.29907		86	-0.40894
	86	-0.32959		86	-0.3479		86	-0.37231		86	-0.42114
	86.1094	-0.354		86	-0.36011		86	-0.3479		86	-0.45776
	86.2031	-0.37231		86.125	-0.354		86	-0.3479		86.25	-0.39673
	86.3125	-0.37842		86.25	-0.3418		86.25	-0.33569		86.25	-0.40894
	86.4062	-0.3479		86.375	-0.37842		86.25	-0.32349		86.5	-0.40283
	86.5	-0.37231		86.5	-0.31738		86.5	-0.29907		86.5	-0.39673
	86.6094	-0.3418		86.5	-0.3418		86.5	-0.37231		86.5	-0.36621
	86.7031	-0.36621		86.625	-0.37231		86.5	-0.36011		86.75	-0.38452
	86.8125	-0.39673		86.75	-0.42114		86.75	-0.3479		86.75	-0.36621
	86.9062	-0.3479		86.875	-0.41504		86.75	-0.37231		87	-0.36011
	87	-0.37842		87	-0.43945		87	-0.36011		87	-0.37231
	87.1094	-0.39063		87	-0.43945		87	-0.39673		87	-0.32349
	87.2031	-0.40894		87.125	-0.45166		87	-0.42114		87.25	-0.3479
	87.3125	-0.39063		87.25	-0.48218		87.25	-0.3479		87.25	-0.32959
	87.4062	-0.41504		87.375	-0.43335		87.25	-0.36621		87.5	-0.3479
	87.5	-0.37231		87.5	-0.46997		87.5	-0.38452		87.5	-0.37842
	87.6094	-0.39063		87.5	-0.41504		87.5	-0.3479		87.5	-0.36621
	87.7031	-0.43335		87.625	-0.40283		87.5	-0.38452		87.75	-0.3479
	87.8125	-0.39673		87.75	-0.42114		87.75	-0.41504		87.75	-0.37842
	87.9062	-0.41504		87.875	-0.43335		87.75	-0.37231		88	-0.39063
	88	-0.39673		88	-0.43335		88	-0.42114		88	-0.3479
	88.1094	-0.42114		88	-0.45776		88	-0.37842		88	-0.39673
	88.2031	-0.42114		88.125	-0.46997		88	-0.39063		88.25	-0.32349
	88.3125	-0.43335		88.25	-0.42114		88.25	-0.39673		88.25	-0.31738
	88.4062	-0.43335		88.375	-0.45166		88.25	-0.40894		88.5	-0.32349
	88.5	-0.44556		88.5	-0.40283		88.5	-0.39673		88.5	-0.30518
	88.6094	-0.45776		88.5	-0.40283		88.5	-0.40283		88.5	-0.29907
	88.7031	-0.45166		88.625	-0.39673		88.5	-0.39063		88.75	-0.33569
	88.8125	-0.45166		88.75	-0.41504		88.75	-0.37842		88.75	-0.354
	88.9062	-0.45166		88.875	-0.43945		88.75	-0.43945		89	-0.37231
	89	-0.49438		89	-0.45166		89	-0.38452		89	-0.37842
	89.1094	-0.47607		89	-0.41504		89	-0.40894		89	-0.3418
	89.2031	-0.5127		89.125	-0.40894		89	-0.39063		89.25	-0.39063
	89.3125	-0.45776		89.25	-0.45776		89.25	-0.36621		89.25	-0.37231
	89.4062	-0.46387		89.375	-0.42114		89.25	-0.37842		89.5	-0.3479
	89.5	-0.45776		89.5	-0.45166		89.5	-0.42725		89.5	-0.37231
	89.6094	-0.43945		89.5	-0.44556		89.5	-0.41504		89.5	-0.38452
	89.7031	-0.42114		89.625	-0.39063		89.5	-0.40894		89.75	-0.37842
	89.8125	-0.42725		89.75	-0.39673		89.75	-0.43945		89.75	-0.39673
	89.9062	-0.43945		89.875	-0.40894		89.75	-0.38452		90	-0.40283
	90	-0.43335		90	-0.39673		90	-0.40283		90	-0.36621
	90.1094	-0.45166		90	-0.39063		90	-0.39673		90	-0.42725
	90.2031	-0.41504		90.125	-0.40283		90	-0.40283		90.25	-0.38452
	90.3125	-0.41504		90.25	-0.36011		90.25	-0.40283		90.25	-0.39673
	90.4062	-0.45166		90.375	-0.38452		90.25	-0.40283		90.5	-0.40283
	90.5	-0.41504		90.5	-0.354		90.5	-0.41504		90.5	-0.36011
	90.6094	-0.38452		90.5	-0.38452		90.5	-0.41504		90.5	-0.40894
	90.7031	-0.42114		90.625	-0.39673		90.5	-0.42725		90.75	-0.43335
	90.8125	-0.38452		90.75	-0.39063		90.75	-0.39063		90.75	-0.42725
	90.9062	-0.39673		90.875	-0.39673		90.75	-0.42114		91	-0.42725
	91	-0.41504		91	-0.39673		91	-0.40283		91	-0.45776
	91.1094	-0.36011		91	-0.40283		91	-0.39673		91	-0.40283
	91.2031	-0.39063		91.125	-0.354		91	-0.38452		91.25	-0.46387
	91.3125	-0.37842		91.25	-0.354		91.25	-0.36621		91.25	-0.45776
	91.4062	-0.37231		91.375	-0.33569		91.25	-0.36621		91.5	-0.43335
	91.5	-0.39673		91.5	-0.32959		91.5	-0.37231		91.5	-0.41504
	91.6094	-0.39063		91.5	-0.354		91.5	-0.43335		91.5	-0.39063
	91.7031	-0.36621		91.625	-0.354		91.5	-0.38452		91.75	-0.354
	91.8125	-0.40283		91.75	-0.36621		91.75	-0.40894		91.75	-0.38452
	91.9062	-0.41504		91.875	-0.354		91.75	-0.38452		92	-0.37842
	92	-0.37231		92	-0.36621		92	-0.38452		92	-0.37231
	92.1094	-0.39063		92	-0.32959		92	-0.354		92	-0.40894
	92.2031	-0.37231		92.125	-0.37231		92	-0.354		92.25	-0.42114
	92.3125	-0.37231		92.25	-0.37231		92.25	-0.3418		92.25	-0.42725
	92.4062	-0.41504		92.375	-0.39063		92.25	-0.31128		92.5	-0.45166
	92.5	-0.37231		92.5	-0.37231		92.5	-0.3479		92.5	-0.43335
	92.6094	-0.37842		92.5	-0.38452		92.5	-0.32349		92.5	-0.39673
	92.7031	-0.40283		92.625	-0.37842		92.5	-0.37842		92.75	-0.39673
	92.8125	-0.40894		92.75	-0.40283		92.75	-0.32959		92.75	-0.39063
	92.9062	-0.36621		92.875	-0.42725		92.75	-0.3418		93	-0.36011
	93	-0.39673		93	-0.39673		93	-0.37231		93	-0.37842
	93.1094	-0.36621		93	-0.43335		93	-0.354		93	-0.39063
	93.2031	-0.37842		93.125	-0.36621		93	-0.32959		93.25	-0.41504
	93.3125	-0.40283		93.25	-0.354		93.25	-0.36621		93.25	-0.40894
	93.4062	-0.36011		93.375	-0.36621		93.25	-0.354		93.5	-0.40894
	93.5	-0.37842		93.5	-0.36011		93.5	-0.32959		93.5	-0.40283
	93.6094	-0.36011		93.5	-0.36011		93.5	-0.38452		93.5	-0.37842
	93.7031	-0.38452		93.625	-0.39673		93.5	-0.3418		93.75	-0.40283
	93.8125	-0.36621		93.75	-0.40283		93.75	-0.36621		93.75	-0.37231
	93.9062	-0.36621		93.875	-0.37842		93.75	-0.39063		94	-0.37842
	94	-0.354		94	-0.45166		94	-0.40894		94	-0.36621
	94.1094	-0.37842		94	-0.42725		94	-0.40283		94	-0.36621
	94.2031	-0.39673		94.125	-0.42725		94	-0.43945		94.25	-0.37231
	94.3125	-0.39063		94.25	-0.41504		94.25	-0.42114		94.25	-0.39673
	94.4062	-0.42114		94.375	-0.40283		94.25	-0.43335		94.5	-0.39063
	94.5	-0.36621		94.5	-0.43335		94.5	-0.43335		94.5	-0.39673
	94.6094	-0.43335		94.5	-0.41504		94.5	-0.37842		94.5	-0.39673
	94.7031	-0.40894		94.625	-0.41504		94.5	-0.43945		94.75	-0.37231
	94.8125	-0.40894		94.75	-0.43945		94.75	-0.45776		94.75	-0.43335
	94.9062	-0.37842		94.875	-0.46997		94.75	-0.43945		95	-0.37231
	95	-0.39673		95	-0.39063		95	-0.45166		95	-0.36011
	95.1094	-0.41504		95	-0.42725		95	-0.44556		95	-0.38452
	95.2031	-0.40283		95.125	-0.42725		95	-0.40894		95.25	-0.36621
	95.3125	-0.41504		95.25	-0.37231		95.25	-0.44556		95.25	-0.36621
	95.4062	-0.40283		95.375	-0.40894		95.25	-0.44556		95.5	-0.37842
	95.5	-0.40283		95.5	-0.42725		95.5	-0.45166		95.5	-0.37231
	95.6094	-0.39063		95.5	-0.41504		95.5	-0.48218		95.5	-0.3479
	95.7031	-0.46997		95.625	-0.42114		95.5	-0.43335		95.75	-0.39673
	95.8125	-0.42114		95.75	-0.45166		95.75	-0.45166		95.75	-0.3479
	95.9062	-0.42725		95.875	-0.42725		95.75	-0.45776		96	-0.39673
	96	-0.43335		96	-0.46997		96	-0.46387		96	-0.39063
	96.1094	-0.42114		96	-0.42725		96	-0.49438		96	-0.354
	96.2031	-0.43335		96.125	-0.43335		96	-0.50049		96.25	-0.37842
	96.3125	-0.45166		96.25	-0.46387		96.25	-0.48218		96.25	-0.37231
	96.4062	-0.45776		96.375	-0.45166		96.25	-0.47607		96.5	-0.39063
	96.5	-0.43335		96.5	-0.47607		96.5	-0.48828		96.5	-0.41504
	96.6094	-0.46997		96.5	-0.45166		96.5	-0.42114		96.5	-0.42725
	96.7031	-0.42725		96.625	-0.43335		96.5	-0.42725		96.75	-0.37231
	96.8125	-0.45166		96.75	-0.43335		96.75	-0.43945		96.75	-0.42114
	96.9062	-0.43945		96.875	-0.45776		96.75	-0.42114		97	-0.42114
	97	-0.39063		97	-0.40283		97	-0.43335		97	-0.42725
	97.1094	-0.40894		97	-0.42725		97	-0.43945		97	-0.48828
	97.2031	-0.43945		97.125	-0.42114		97	-0.46997		97.25	-0.48828
	97.3125	-0.42114		97.25	-0.38452		97.25	-0.44556		97.25	-0.50049
	97.4062	-0.42725		97.375	-0.41504		97.25	-0.44556		97.5	-0.47607
	97.5	-0.44556		97.5	-0.40283		97.5	-0.41504		97.5	-0.49438
	97.6094	-0.36621		97.5	-0.41504		97.5	-0.44556		97.5	-0.48218
	97.7031	-0.42114		97.625	-0.40283		97.5	-0.39063		97.75	-0.50659
	97.8125	-0.39063		97.75	-0.42114		97.75	-0.38452		97.75	-0.44556
	97.9062	-0.36011		97.875	-0.40894		97.75	-0.41504		98	-0.47607
	98	-0.37231		98	-0.43335		98	-0.39063		98	-0.46387
	98.1094	-0.31738		98	-0.37231		98	-0.40283		98	-0.42725
	98.2031	-0.32959		98.125	-0.39063		98	-0.3418		98.25	-0.46997
	98.3125	-0.32349		98.25	-0.39673		98.25	-0.37842		98.25	-0.45166
	98.4062	-0.3418		98.375	-0.39673		98.25	-0.3479		98.5	-0.43945
	98.5	-0.31738		98.5	-0.39063		98.5	-0.37231		98.5	-0.43335
	98.6094	-0.3418		98.5	-0.40894		98.5	-0.36621		98.5	-0.43945
	98.7031	-0.28687		98.625	-0.42114		98.5	-0.37231		98.75	-0.37842
	98.8125	-0.31128		98.75	-0.40283		98.75	-0.36011		98.75	-0.40283
	98.9062	-0.354		98.875	-0.42725		98.75	-0.38452		99	-0.39673
	99	-0.31128		99	-0.40283		99	-0.38452		99	-0.40894
	99.1094	-0.33569		99	-0.36621		99	-0.37231		99	-0.43335
	99.2031	-0.32959		99.125	-0.36011		99	-0.41504		99.25	-0.40894
	99.3125	-0.33569		99.25	-0.37842		99.25	-0.37842		99.25	-0.44556
	99.4062	-0.32959		99.375	-0.36011		99.25	-0.40283		99.5	-0.42725
	99.5	-0.36011		99.5	-0.37231		99.5	-0.40283		99.5	-0.40894
	99.6094	-0.31128		99.5	-0.40283		99.5	-0.39673		99.5	-0.37231
	99.7031	-0.354		99.625	-0.40894		99.5	-0.38452		99.75	-0.40894
	99.8125	-0.36011		99.75	-0.41504		99.75	-0.39063		99.75	-0.37231
	99.9062	-0.37842		99.875	-0.354		99.75	-0.39063		100	-0.37842
	100	-0.39063		100	-0.3479		100	-0.38452		100	-0.40283
	100.109	-0.38452		100	-0.3479		100	-0.39673		100	-0.40894
	100.203	-0.36621		100.125	-0.36621		100	-0.36621		100.25	-0.43335
	100.312	-0.38452		100.25	-0.37231		100.25	-0.43335		100.25	-0.38452
	100.406	-0.37231		100.375	-0.39673		100.25	-0.39673		100.5	-0.40283
	100.5	-0.37842		100.5	-0.39673		100.5	-0.39673		100.5	-0.39673
	100.609	-0.39673		100.5	-0.37231		100.5	-0.39673		100.5	-0.41504
	100.703	-0.39063		100.625	-0.42114		100.5	-0.37231		100.75	-0.44556
	100.812	-0.36621		100.75	-0.37842		100.75	-0.36011		100.75	-0.44556
	100.906	-0.37231		100.875	-0.37231		100.75	-0.37231		101	-0.42725
	101	-0.37231		101	-0.40283		101	-0.37231		101	-0.40283
	101.109	-0.39673		101	-0.39673		101	-0.36621		101	-0.40283
	101.203	-0.39063		101.125	-0.39063		101	-0.42725		101.25	-0.38452
	101.312	-0.45166		101.25	-0.41504		101.25	-0.37231		101.25	-0.36621
	101.406	-0.41504		101.375	-0.43335		101.25	-0.42725		101.5	-0.36011
	101.5	-0.42725		101.5	-0.42725		101.5	-0.40894		101.5	-0.37231
	101.609	-0.40894		101.5	-0.47607		101.5	-0.354		101.5	-0.33569
	101.703	-0.36011		101.625	-0.40283		101.5	-0.37842		101.75	-0.354
	101.812	-0.37231		101.75	-0.44556		101.75	-0.39063		101.75	-0.38452
	101.906	-0.41504		101.875	-0.45166		101.75	-0.40894		102	-0.36621
	102	-0.43945		102	-0.43945		102	-0.42114		102	-0.37842
	102.109	-0.40283		102	-0.48218		102	-0.45166		102	-0.40283
	102.203	-0.44556		102.125	-0.46387		102	-0.36011		102.25	-0.41504
	102.312	-0.40283		102.25	-0.43945		102.25	-0.40283		102.25	-0.37842
	102.406	-0.40894		102.375	-0.44556		102.25	-0.42114		102.5	-0.42114
	102.5	-0.41504		102.5	-0.48828		102.5	-0.42725		102.5	-0.38452
	102.609	-0.39063		102.5	-0.41504		102.5	-0.42725		102.5	-0.39063
	102.703	-0.42725		102.625	-0.43945		102.5	-0.40283		102.75	-0.41504
	102.812	-0.40894		102.75	-0.40283		102.75	-0.42725		102.75	-0.38452
	102.906	-0.40894		102.875	-0.41504		102.75	-0.44556		103	-0.41504
	103	-0.40894		103	-0.46387		103	-0.43335		103	-0.39063
	103.109	-0.42114		103	-0.43945		103	-0.42725		103	-0.40894
	103.203	-0.39673		103.125	-0.45166		103	-0.45166		103.25	-0.40894
	103.312	-0.43335		103.25	-0.44556		103.25	-0.43335		103.25	-0.45166
	103.406	-0.41504		103.375	-0.43335		103.25	-0.44556		103.5	-0.39063
	103.5	-0.38452		103.5	-0.40283		103.5	-0.47607		103.5	-0.42725
	103.609	-0.40283		103.5	-0.46387		103.5	-0.42114		103.5	-0.41504
	103.703	-0.40894		103.625	-0.42114		103.5	-0.42725		103.75	-0.40894
	103.812	-0.42725		103.75	-0.42114		103.75	-0.42725		103.75	-0.45776
	103.906	-0.43945		103.875	-0.41504		103.75	-0.39063		104	-0.43335
	104	-0.43945		104	-0.39063		104	-0.42114		104	-0.43945
	104.109	-0.39063		104	-0.39673		104	-0.43335		104	-0.42725
	104.203	-0.42114		104.125	-0.37842		104	-0.37842		104.25	-0.41504
	104.312	-0.37231		104.25	-0.36011		104.25	-0.39673		104.25	-0.40283
	104.406	-0.39673		104.375	-0.36621		104.25	-0.38452		104.5	-0.44556
	104.5	-0.41504		104.5	-0.42114		104.5	-0.40894		104.5	-0.40894
	104.609	-0.39063		104.5	-0.37842		104.5	-0.42725		104.5	-0.44556
	104.703	-0.42725		104.625	-0.36011		104.5	-0.37231		104.75	-0.47607
	104.812	-0.43335		104.75	-0.354		104.75	-0.38452		104.75	-0.40283
	104.906	-0.42114		104.875	-0.36621		104.75	-0.36011		105	-0.43335
	105	-0.40894		105	-0.39063		105	-0.354		105	-0.40894
	105.109	-0.42725		105	-0.38452		105	-0.354		105	-0.39673
	105.203	-0.36621		105.125	-0.39673		105	-0.40894		105.25	-0.40283
	105.312	-0.37842		105.25	-0.37231		105.25	-0.39063		105.25	-0.43335
	105.406	-0.36621		105.375	-0.39063		105.25	-0.37842		105.5	-0.37231
	105.5	-0.36621		105.5	-0.36621		105.5	-0.3418		105.5	-0.38452
	105.609	-0.40283		105.5	-0.37231		105.5	-0.33569		105.5	-0.38452
	105.703	-0.354		105.625	-0.354		105.5	-0.37231		105.75	-0.354
	105.812	-0.354		105.75	-0.37842		105.75	-0.33569		105.75	-0.39673
	105.906	-0.36011		105.875	-0.39673		105.75	-0.37842		106	-0.36011
	106	-0.37231		106	-0.40283		106	-0.31738		106	-0.37842
	106.109	-0.33569		106	-0.38452		106	-0.32349		106	-0.38452
	106.203	-0.37842		106.125	-0.3418		106	-0.32959		106.25	-0.38452
	106.312	-0.3418		106.25	-0.37231		106.25	-0.33569		106.25	-0.37231
	106.406	-0.38452		106.375	-0.3418		106.25	-0.3479		106.5	-0.38452
	106.5	-0.38452		106.5	-0.36621		106.5	-0.354		106.5	-0.38452
	106.609	-0.39063		106.5	-0.37231		106.5	-0.37842		106.5	-0.37231
	106.703	-0.39673		106.625	-0.36621		106.5	-0.36621		106.75	-0.39673
	106.812	-0.42725		106.75	-0.37231		106.75	-0.39063		106.75	-0.3418
	106.906	-0.41504		106.875	-0.36621		106.75	-0.32349		107	-0.38452
	107	-0.37842		107	-0.39063		107	-0.36621		107	-0.37842
	107.109	-0.36011		107	-0.36011		107	-0.37842		107	-0.36011
	107.203	-0.37842		107.125	-0.39673		107	-0.36621		107.25	-0.31738
	107.312	-0.37231		107.25	-0.39063		107.25	-0.37231		107.25	-0.32349
	107.406	-0.37231		107.375	-0.43335		107.25	-0.3479		107.5	-0.31128
	107.5	-0.37842		107.5	-0.39673		107.5	-0.36011		107.5	-0.31738
	107.609	-0.39673		107.5	-0.36621		107.5	-0.37842		107.5	-0.32959
	107.703	-0.38452		107.625	-0.40283		107.5	-0.37231		107.75	-0.30518
	107.812	-0.40894		107.75	-0.40283		107.75	-0.31128		107.75	-0.3418
	107.906	-0.37842		107.875	-0.41504		107.75	-0.37231		108	-0.31738
	108	-0.40283		108	-0.44556		108	-0.37231		108	-0.354
	108.109	-0.42114		108	-0.40894		108	-0.38452		108	-0.354
	108.203	-0.46387		108.125	-0.40894		108	-0.38452		108.25	-0.3479
	108.312	-0.45776		108.25	-0.45166		108.25	-0.354		108.25	-0.31738
	108.406	-0.46387		108.375	-0.44556		108.25	-0.38452		108.5	-0.36621
	108.5	-0.45776		108.5	-0.40283		108.5	-0.40894		108.5	-0.36621
	108.609	-0.46387		108.5	-0.42725		108.5	-0.42114		108.5	-0.3418
	108.703	-0.48218		108.625	-0.42114		108.5	-0.40894		108.75	-0.3418
	108.812	-0.42114		108.75	-0.44556		108.75	-0.42725		108.75	-0.37842
	108.906	-0.48828		108.875	-0.46387		108.75	-0.36011		109	-0.39063
	109	-0.46387		109	-0.45776		109	-0.41504		109	-0.38452
	109.109	-0.45776		109	-0.44556		109	-0.39063		109	-0.38452
	109.203	-0.48218		109.125	-0.45166		109	-0.3418		109.25	-0.3479
	109.312	-0.45166		109.25	-0.37231		109.25	-0.40894		109.25	-0.36621
	109.406	-0.45776		109.375	-0.40283		109.25	-0.42114		109.5	-0.36621
	109.5	-0.46997		109.5	-0.40283		109.5	-0.42725		109.5	-0.37231
	109.609	-0.50049		109.5	-0.37231		109.5	-0.44556		109.5	-0.36011
	109.703	-0.42114		109.625	-0.40283		109.5	-0.43335		109.75	-0.37842
	109.812	-0.45166		109.75	-0.40894		109.75	-0.38452		109.75	-0.42114
	109.906	-0.40283		109.875	-0.40283		109.75	-0.42725		110	-0.39673
	110	-0.43335		110	-0.42114		110	-0.40894		110	-0.41504
	110.109	-0.43945		110	-0.42725		110	-0.42725		110	-0.37231
	110.203	-0.40283		110.125	-0.36621		110	-0.45776		110.25	-0.41504
	110.312	-0.41504		110.25	-0.40283		110.25	-0.42725		110.25	-0.42114
	110.406	-0.41504		110.375	-0.38452		110.25	-0.45776		110.5	-0.42114
	110.5	-0.39673		110.5	-0.36621		110.5	-0.43945		110.5	-0.43945
	110.609	-0.40894		110.5	-0.40283		110.5	-0.45166		110.5	-0.39063
	110.703	-0.45776		110.625	-0.38452		110.5	-0.42725		110.75	-0.39673
	110.812	-0.36621		110.75	-0.40283		110.75	-0.48218		110.75	-0.42114
	110.906	-0.39673		110.875	-0.36011		110.75	-0.38452		111	-0.40894
	111	-0.40894		111	-0.3479		111	-0.42114		111	-0.36621
	111.109	-0.41504		111	-0.3479		111	-0.41504		111	-0.42114
	111.203	-0.44556		111.125	-0.38452		111	-0.40283		111.25	-0.40894
	111.312	-0.40283		111.25	-0.36621		111.25	-0.42725		111.25	-0.41504
	111.406	-0.38452		111.375	-0.36621		111.25	-0.45166		111.5	-0.49438
	111.5	-0.38452		111.5	-0.38452		111.5	-0.43945		111.5	-0.41504
	111.609	-0.40283		111.5	-0.31738		111.5	-0.43945		111.5	-0.43945
	111.703	-0.36621		111.625	-0.33569		111.5	-0.39673		111.75	-0.40894
	111.812	-0.38452		111.75	-0.32959		111.75	-0.39063		111.75	-0.40894
	111.906	-0.36621		111.875	-0.36011		111.75	-0.39673		112	-0.41504
	112	-0.36011		112	-0.3418		112	-0.3479		112	-0.42725
	112.109	-0.37231		112	-0.3479		112	-0.354		112	-0.40894
	112.203	-0.33569		112.125	-0.354		112	-0.37231		112.25	-0.44556
	112.312	-0.36621		112.25	-0.3479		112.25	-0.3479		112.25	-0.46997
	112.406	-0.354		112.375	-0.33569		112.25	-0.37842		112.5	-0.40283
	112.5	-0.37231		112.5	-0.32959		112.5	-0.36621		112.5	-0.45776
	112.609	-0.36011		112.5	-0.38452		112.5	-0.37842		112.5	-0.42725
	112.703	-0.37842		112.625	-0.38452		112.5	-0.3479		112.75	-0.41504
	112.812	-0.37842		112.75	-0.41504		112.75	-0.354		112.75	-0.42725
	112.906	-0.39673		112.875	-0.39063		112.75	-0.3479		113	-0.44556
	113	-0.41504		113	-0.38452		113	-0.37231		113	-0.40894
	113.109	-0.39673		113	-0.3479		113	-0.36011		113	-0.43335
	113.203	-0.37842		113.125	-0.354		113	-0.3479		113.25	-0.41504
	113.312	-0.3418		113.25	-0.37231		113.25	-0.3418		113.25	-0.40283
	113.406	-0.41504		113.375	-0.37842		113.25	-0.31128		113.5	-0.45166
	113.5	-0.37231		113.5	-0.40894		113.5	-0.33569		113.5	-0.39673
	113.609	-0.39673		113.5	-0.40283		113.5	-0.31738		113.5	-0.43335
	113.703	-0.39063		113.625	-0.41504		113.5	-0.3418		113.75	-0.40894
	113.812	-0.39673		113.75	-0.37842		113.75	-0.354		113.75	-0.38452
	113.906	-0.42114		113.875	-0.41504		113.75	-0.37842		114	-0.39063
	114	-0.41504		114	-0.38452		114	-0.39673		114	-0.39063
	114.109	-0.41504		114	-0.39673		114	-0.39063		114	-0.36011
	114.203	-0.39673		114.125	-0.42114		114	-0.42725		114.25	-0.37842
	114.312	-0.40894		114.25	-0.39673		114.25	-0.42725		114.25	-0.41504
	114.406	-0.354		114.375	-0.41504		114.25	-0.44556		114.5	-0.3479
	114.5	-0.39063		114.5	-0.42114		114.5	-0.39063		114.5	-0.39063
	114.609	-0.37842		114.5	-0.43335		114.5	-0.42114		114.5	-0.354
	114.703	-0.37842		114.625	-0.40894		114.5	-0.39673		114.75	-0.36621
	114.812	-0.38452		114.75	-0.44556		114.75	-0.39673		114.75	-0.36621
	114.906	-0.3479		114.875	-0.38452		114.75	-0.43335		115	-0.36011
	115	-0.37231		115	-0.44556		115	-0.38452		115	-0.354
	115.109	-0.39673		115	-0.42725		115	-0.39673		115	-0.3479
	115.203	-0.43335		115.125	-0.40894		115	-0.43335		115.25	-0.36621
	115.312	-0.39673		115.25	-0.43945		115.25	-0.43945		115.25	-0.3418
	115.406	-0.46997		115.375	-0.45776		115.25	-0.43335		115.5	-0.37842
	115.5	-0.43335		115.5	-0.43335		115.5	-0.50659		115.5	-0.33569
	115.609	-0.42114		115.5	-0.44556		115.5	-0.46997		115.5	-0.36621
	115.703	-0.40283		115.625	-0.42114		115.5	-0.48218		115.75	-0.36011
	115.812	-0.37842		115.75	-0.39673		115.75	-0.46997		115.75	-0.36621
	115.906	-0.42114		115.875	-0.42114		115.75	-0.40894		116	-0.32959
	116	-0.43945		116	-0.39673		116	-0.45776		116	-0.33569
	116.109	-0.42725		116	-0.39063		116	-0.44556		116	-0.38452
	116.203	-0.42114		116.125	-0.42114		116	-0.43945		116.25	-0.36621
	116.312	-0.45166		116.25	-0.42725		116.25	-0.46997		116.25	-0.39063
	116.406	-0.40894		116.375	-0.42725		116.25	-0.47607		116.5	-0.38452
	116.5	-0.45776		116.5	-0.39673		116.5	-0.43335		116.5	-0.40894
	116.609	-0.48218		116.5	-0.41504		116.5	-0.50049		116.5	-0.39673
	116.703	-0.43945		116.625	-0.42114		116.5	-0.48828		116.75	-0.43945
	116.812	-0.46997		116.75	-0.45166		116.75	-0.44556		116.75	-0.42725
	116.906	-0.45776		116.875	-0.37842		116.75	-0.48218		117	-0.43335
	117	-0.41504		117	-0.40894		117	-0.44556		117	-0.47607
	117.109	-0.42725		117	-0.41504		117	-0.46997		117	-0.45776
	117.203	-0.40894		117.125	-0.39063		117	-0.48218		117.25	-0.46997
	117.312	-0.38452		117.25	-0.42114		117.25	-0.46997		117.25	-0.48218
	117.406	-0.40283		117.375	-0.39063		117.25	-0.43335		117.5	-0.47607
	117.5	-0.354		117.5	-0.40283		117.5	-0.44556		117.5	-0.50659
	117.609	-0.3479		117.5	-0.40283		117.5	-0.40894		117.5	-0.46387
	117.703	-0.39063		117.625	-0.42725		117.5	-0.42725		117.75	-0.45166
	117.812	-0.39063		117.75	-0.39673		117.75	-0.45776		117.75	-0.47607
	117.906	-0.40283		117.875	-0.39673		117.75	-0.40283		118	-0.48218
	118	-0.354		118	-0.37842		118	-0.43945		118	-0.45166
	118.109	-0.3418		118	-0.354		118	-0.42725		118	-0.48828
	118.203	-0.33569		118.125	-0.39063		118	-0.39673		118.25	-0.42114
	118.312	-0.37842		118.25	-0.33569		118.25	-0.37231		118.25	-0.42725
	118.406	-0.32349		118.375	-0.38452		118.25	-0.40283		118.5	-0.44556
	118.5	-0.32349		118.5	-0.37842		118.5	-0.354		118.5	-0.43335
	118.609	-0.33569		118.5	-0.37231		118.5	-0.39063		118.5	-0.39063
	118.703	-0.33569		118.625	-0.32349		118.5	-0.40283		118.75	-0.40283
	118.812	-0.33569		118.75	-0.3418		118.75	-0.37231		118.75	-0.40283
	118.906	-0.33569		118.875	-0.32959		118.75	-0.39673		119	-0.40894
	119	-0.354		119	-0.3418		119	-0.37842		119	-0.42725
	119.109	-0.32959		119	-0.3479		119	-0.42114		119	-0.37231
	119.203	-0.36621		119.125	-0.33569		119	-0.40894		119.25	-0.45166
	119.312	-0.33569		119.25	-0.36011		119.25	-0.40283		119.25	-0.43335
	119.406	-0.3418		119.375	-0.3479		119.25	-0.36011		119.5	-0.38452
	119.5	-0.32959		119.5	-0.37842		119.5	-0.40283		119.5	-0.39063
	119.609	-0.36011		119.5	-0.33569		119.5	-0.40283		119.5	-0.40894
	119.703	-0.36621		119.625	-0.36621		119.5	-0.37231		119.75	-0.37231
	119.812	-0.32349		119.75	-0.39673		119.75	-0.39063		119.75	-0.39063
	119.906	-0.3418		119.875	-0.40894		119.75	-0.39063		120	-0.42725
	120	-0.32959		120	-0.41504		120	-0.39673		120	-0.39063
	120.109	-0.36621		120	-0.39673		120	-0.40283		120	-0.43945
	120.203	-0.37231		120.125	-0.43945		120	-0.38452		120.25	-0.36621
	120.312	-0.37231		120.25	-0.42725		120.25	-0.36621		120.25	-0.40283
	120.406	-0.38452		120.375	-0.43335		120.25	-0.36011		120.5	-0.40283
	120.5	-0.36011		120.5	-0.42725		120.5	-0.37842		120.5	-0.36621
	120.609	-0.37231		120.5	-0.43945		120.5	-0.37231		120.5	-0.36621
	120.703	-0.40894		120.625	-0.40894		120.5	-0.354		120.75	-0.37842
	120.812	-0.40283		120.75	-0.40283		120.75	-0.31738		120.75	-0.37842
	120.906	-0.36621		120.875	-0.42114		120.75	-0.36621		121	-0.36011
	121	-0.42114		121	-0.39063		121	-0.3479		121	-0.40283
	121.109	-0.40894		121	-0.42725		121	-0.36621		121	-0.36621
	121.203	-0.40894		121.125	-0.43945		121	-0.354		121.25	-0.39673
	121.312	-0.41504		121.25	-0.46997		121.25	-0.38452		121.25	-0.39673
	121.406	-0.41504		121.375	-0.42725		121.25	-0.37231		121.5	-0.37231
	121.5	-0.42725		121.5	-0.46997		121.5	-0.36621		121.5	-0.37842
	121.609	-0.43945		121.5	-0.42114		121.5	-0.42725		121.5	-0.37231
	121.703	-0.42114		121.625	-0.40894		121.5	-0.39063		121.75	-0.39063
	121.812	-0.39673		121.75	-0.42725		121.75	-0.40283		121.75	-0.39063
	121.906	-0.43335		121.875	-0.40894		121.75	-0.40894		122	-0.39063
	122	-0.3479		122	-0.45166		122	-0.42725		122	-0.36011
	122.109	-0.41504		122	-0.45776		122	-0.39063		122	-0.41504
	122.203	-0.40894		122.125	-0.42725		122	-0.43335		122.25	-0.40283
	122.312	-0.354		122.25	-0.41504		122.25	-0.41504		122.25	-0.40894
	122.406	-0.40283		122.375	-0.43335		122.25	-0.40283		122.5	-0.40894
	122.5	-0.42725		122.5	-0.38452		122.5	-0.43945		122.5	-0.39063
	122.609	-0.40894		122.5	-0.42114		122.5	-0.39673		122.5	-0.40283
	122.703	-0.45776		122.625	-0.40283		122.5	-0.45166		122.75	-0.39673
	122.812	-0.46387		122.75	-0.39673		122.75	-0.43945		122.75	-0.39673
	122.906	-0.39063		122.875	-0.45166		122.75	-0.42725		123	-0.354
	123	-0.42725		123	-0.42725		123	-0.44556		123	-0.39673
	123.109	-0.37842		123	-0.41504		123	-0.45776		123	-0.40283
	123.203	-0.40894		123.125	-0.43945		123	-0.37842		123.25	-0.37842
	123.312	-0.42725		123.25	-0.43945		123.25	-0.40283		123.25	-0.38452
	123.406	-0.43945		123.375	-0.40894		123.25	-0.42114		123.5	-0.40283
	123.5	-0.43335		123.5	-0.47607		123.5	-0.39673		123.5	-0.39673
	123.609	-0.44556		123.5	-0.45166		123.5	-0.46997		123.5	-0.38452
	123.703	-0.41504		123.625	-0.44556		123.5	-0.43945		123.75	-0.43335
	123.812	-0.40894		123.75	-0.45776		123.75	-0.41504		123.75	-0.39673
	123.906	-0.41504		123.875	-0.38452		123.75	-0.42114		124	-0.42114
	124	-0.37231		124	-0.39673		124	-0.44556		124	-0.40894
	124.109	-0.42114		124	-0.39673		124	-0.42725		124	-0.41504
	124.203	-0.42725		124.125	-0.37231		124	-0.45776		124.25	-0.40894
	124.312	-0.39673		124.25	-0.354		124.25	-0.45166		124.25	-0.41504
	124.406	-0.40283		124.375	-0.37231		124.25	-0.43335		124.5	-0.41504
	124.5	-0.39063		124.5	-0.32349		124.5	-0.45166		124.5	-0.41504
	124.609	-0.39063		124.5	-0.37842		124.5	-0.36621		124.5	-0.44556
	124.703	-0.39673		124.625	-0.41504		124.5	-0.39063		124.75	-0.45166
	124.812	-0.43335		124.75	-0.38452		124.75	-0.39063		124.75	-0.50659
	124.906	-0.40283		124.875	-0.39063		124.75	-0.37842		125	-0.43945
	125	-0.39063		125	-0.39673		125	-0.36621		125	-0.43335
	125.109	-0.3479		125	-0.36621		125	-0.37231		125	-0.44556
	125.203	-0.37231		125.125	-0.36011		125	-0.32959		125.25	-0.45776
	125.312	-0.36011		125.25	-0.37231		125.25	-0.36011		125.25	-0.43335
	125.406	-0.36011		125.375	-0.3418		125.25	-0.37842		125.5	-0.48218
	125.5	-0.39063		125.5	-0.3479		125.5	-0.29907		125.5	-0.46997
	125.609	-0.37231		125.5	-0.36621		125.5	-0.33569		125.5	-0.43945
	125.703	-0.39673		125.625	-0.37231		125.5	-0.31128		125.75	-0.44556
	125.812	-0.354		125.75	-0.42114		125.75	-0.32349		125.75	-0.39063
	125.906	-0.36621		125.875	-0.37842		125.75	-0.32959		126	-0.40894
	126	-0.354		126	-0.39673		126	-0.31128		126	-0.40283
	126.109	-0.36011		126	-0.38452		126	-0.29907		126	-0.40283
	126.203	-0.37231		126.125	-0.39063		126	-0.32959		126.25	-0.41504
	126.312	-0.36621		126.25	-0.36621		126.25	-0.36011		126.25	-0.39673
	126.406	-0.39063		126.375	-0.37842		126.25	-0.32959		126.5	-0.36621
	126.5	-0.354		126.5	-0.40283		126.5	-0.37231		126.5	-0.39673
	126.609	-0.42725		126.5	-0.37231		126.5	-0.32959		126.5	-0.43335
	126.703	-0.36011		126.625	-0.38452		126.5	-0.3479		126.75	-0.354
	126.812	-0.36621		126.75	-0.354		126.75	-0.3418		126.75	-0.39673
	126.906	-0.37842		126.875	-0.38452		126.75	-0.3479		127	-0.354
	127	-0.39063		127	-0.38452		127	-0.32959		127	-0.36011
	127.109	-0.36621		127	-0.42725		127	-0.3418		127	-0.36011
	127.203	-0.39063		127.125	-0.40283		127	-0.36621		127.25	-0.3418
	127.312	-0.40283		127.25	-0.40894		127.25	-0.3479		127.25	-0.3479
	127.406	-0.39673		127.375	-0.40283		127.25	-0.39063		127.5	-0.3418
	127.5	-0.43945		127.5	-0.39063		127.5	-0.39063		127.5	-0.3479
	127.609	-0.37842		127.5	-0.43335		127.5	-0.39673		127.5	-0.33569
	127.703	-0.43945		127.625	-0.40894		127.5	-0.37231		127.75	-0.37231
	127.812	-0.43945		127.75	-0.41504		127.75	-0.40894		127.75	-0.31738
	127.906	-0.42725		127.875	-0.40894		127.75	-0.39063		128	-0.354
	128	-0.45166		128	-0.43335		128	-0.40894		128	-0.36011
	128.109	-0.44556		128	-0.37842		128	-0.41504		128	-0.31738
	128.203	-0.42114		128.125	-0.39673		128	-0.41504		128.25	-0.36621
	128.312	-0.43335		128.25	-0.37842		128.25	-0.43335		128.25	-0.36011
	128.406	-0.47607		128.375	-0.38452		128.25	-0.43335		128.5	-0.354
	128.5	-0.41504		128.5	-0.45776		128.5	-0.40283		128.5	-0.3418
	128.609	-0.46387		128.5	-0.43335		128.5	-0.42725		128.5	-0.36011
	128.703	-0.45166		128.625	-0.44556		128.5	-0.40894		128.75	-0.31738
	128.812	-0.43945		128.75	-0.45166		128.75	-0.39673		128.75	-0.354
	128.906	-0.45776		128.875	-0.45166		128.75	-0.42725		129	-0.354
	129	-0.45776		129	-0.45166		129	-0.40894		129	-0.354
	129.109	-0.46387		129	-0.47607		129	-0.39063		129	-0.39673
	129.203	-0.47607		129.125	-0.41504		129	-0.44556		129.25	-0.354
	129.312	-0.47607		129.25	-0.43335		129.25	-0.40894		129.25	-0.37842
	129.406	-0.44556		129.375	-0.46387		129.25	-0.39673		129.5	-0.3479
	129.5	-0.46387		129.5	-0.39063		129.5	-0.39063		129.5	-0.36621
	129.609	-0.43945		129.5	-0.43945		129.5	-0.40894		129.5	-0.36011
	129.703	-0.45166		129.625	-0.40894		129.5	-0.39673		129.75	-0.42114
	129.812	-0.45166		129.75	-0.40283		129.75	-0.44556		129.75	-0.36621
	129.906	-0.42725		129.875	-0.41504		129.75	-0.38452		130	-0.37842
	130	-0.43945		130	-0.43945		130	-0.39673		130	-0.40894
	130.109	-0.45166		130	-0.39063		130	-0.43335		130	-0.37842
	130.203	-0.46997		130.125	-0.41504		130	-0.37842		130.25	-0.36621
	130.312	-0.43335		130.25	-0.41504		130.25	-0.43945		130.25	-0.3479
	130.406	-0.45776		130.375	-0.3418		130.25	-0.41504		130.5	-0.38452
	130.5	-0.39673		130.5	-0.39673		130.5	-0.41504		130.5	-0.36621
	130.609	-0.42114		130.5	-0.36621		130.5	-0.43945		130.5	-0.40283
	130.703	-0.41504		130.625	-0.37231		130.5	-0.43945		130.75	-0.39063
	130.812	-0.40283		130.75	-0.37231		130.75	-0.39673		130.75	-0.40283
	130.906	-0.42725		130.875	-0.37231		130.75	-0.40894		131	-0.39063
	131	-0.40283		131	-0.3479		131	-0.45166		131	-0.40283
	131.109	-0.42114		131	-0.36011		131	-0.37842		131	-0.45166
	131.203	-0.38452		131.125	-0.33569		131	-0.45166		131.25	-0.42114
	131.312	-0.40283		131.25	-0.32349		131.25	-0.42114		131.25	-0.45166
	131.406	-0.38452		131.375	-0.37231		131.25	-0.42114		131.5	-0.41504
	131.5	-0.40283		131.5	-0.33569		131.5	-0.40894		131.5	-0.45166
	131.609	-0.36011		131.5	-0.37231		131.5	-0.37842		131.5	-0.43335
	131.703	-0.3479		131.625	-0.37842		131.5	-0.36011		131.75	-0.43945
	131.812	-0.36621		131.75	-0.39063		131.75	-0.39673		131.75	-0.42114
	131.906	-0.37231		131.875	-0.36621		131.75	-0.36011		132	-0.39063
	132	-0.38452		132	-0.40283		132	-0.3418		132	-0.37842
	132.109	-0.37231		132	-0.3479		132	-0.40283		132	-0.37842
	132.203	-0.42114		132.125	-0.37231		132	-0.3479		132.25	-0.39673
	132.312	-0.36011		132.25	-0.39063		132.25	-0.38452		132.25	-0.37231
	132.406	-0.36621		132.375	-0.39063		132.25	-0.39673		132.5	-0.44556
	132.5	-0.37231		132.5	-0.40283		132.5	-0.36621		132.5	-0.43945
	132.609	-0.37231		132.5	-0.40894		132.5	-0.37842		132.5	-0.46387
	132.703	-0.38452		132.625	-0.37842		132.5	-0.40283		132.75	-0.45166
	132.812	-0.39063		132.75	-0.33569		132.75	-0.38452		132.75	-0.43945
	132.906	-0.37231		132.875	-0.3418		132.75	-0.354		133	-0.43335
	133	-0.36011		133	-0.3479		133	-0.37231		133	-0.42114
	133.109	-0.42114		133	-0.3479		133	-0.32349		133	-0.41504
	133.203	-0.42725		133.125	-0.36011		133	-0.39063		133.25	-0.40283
	133.312	-0.39063		133.25	-0.36621		133.25	-0.37842		133.25	-0.42725
	133.406	-0.39673		133.375	-0.38452		133.25	-0.37231		133.5	-0.39063
	133.5	-0.37231		133.5	-0.37842		133.5	-0.354		133.5	-0.46997
	133.609	-0.40283		133.5	-0.39063		133.5	-0.36621		133.5	-0.43335
	133.703	-0.40894		133.625	-0.37842		133.5	-0.37842		133.75	-0.40894
	133.812	-0.37842		133.75	-0.41504		133.75	-0.38452		133.75	-0.42725
	133.906	-0.40894		133.875	-0.37842		133.75	-0.39673		134	-0.42725
	134	-0.41504		134	-0.39063		134	-0.38452		134	-0.40283
	134.109	-0.37842		134	-0.40283		134	-0.42114		134	-0.42114
	134.203	-0.43335		134.125	-0.36011		134	-0.38452		134.25	-0.37231
	134.312	-0.37231		134.25	-0.38452		134.25	-0.38452		134.25	-0.36621
	134.406	-0.354		134.375	-0.39063		134.25	-0.38452		134.5	-0.39673
	134.5	-0.37842		134.5	-0.39673		134.5	-0.42114		134.5	-0.36621
	134.609	-0.37842		134.5	-0.38452		134.5	-0.41504		134.5	-0.37842
	134.703	-0.37231		134.625	-0.42114		134.5	-0.39673		134.75	-0.40283
	134.812	-0.40283		134.75	-0.39673		134.75	-0.42114		134.75	-0.33569
	134.906	-0.39673		134.875	-0.40283		134.75	-0.39673		135	-0.37842
	135	-0.37842		135	-0.42114		135	-0.42114		135	-0.37842
	135.109	-0.45776		135	-0.37842		135	-0.41504		135	-0.40283
	135.203	-0.40283		135.125	-0.45166		135	-0.45776		135.25	-0.40894
	135.312	-0.40894		135.25	-0.41504		135.25	-0.44556		135.25	-0.43945
	135.406	-0.40283		135.375	-0.42725		135.25	-0.45776		135.5	-0.37231
	135.5	-0.37842		135.5	-0.42114		135.5	-0.44556		135.5	-0.40894
	135.609	-0.41504		135.5	-0.40894		135.5	-0.43945		135.5	-0.39063
	135.703	-0.43335		135.625	-0.37231		135.5	-0.44556		135.75	-0.36011
	135.812	-0.42114		135.75	-0.42114		135.75	-0.42114		135.75	-0.42114
	135.906	-0.40894		135.875	-0.43335		135.75	-0.46387		136	-0.38452
	136	-0.46997		136	-0.40894		136	-0.41504		136	-0.37231
	136.109	-0.43945		136	-0.48828		136	-0.42725		136	-0.39673
	136.203	-0.46997		136.125	-0.43335		136	-0.43945		136.25	-0.42725
	136.312	-0.43945		136.25	-0.42114		136.25	-0.44556		136.25	-0.40894
	136.406	-0.40283		136.375	-0.41504		136.25	-0.45776		136.5	-0.43335
	136.5	-0.43335		136.5	-0.39063		136.5	-0.46997		136.5	-0.40894
	136.609	-0.43945		136.5	-0.354		136.5	-0.45166		136.5	-0.41504
	136.703	-0.45776		136.625	-0.39063		136.5	-0.45776		136.75	-0.45776
	136.812	-0.42725		136.75	-0.37842		136.75	-0.49438		136.75	-0.40894
	136.906	-0.43945		136.875	-0.37842		136.75	-0.45776		137	-0.44556
	137	-0.42114		137	-0.42114		137	-0.43335		137	-0.46387
	137.109	-0.44556		137	-0.37231		137	-0.43335		137	-0.48218
	137.203	-0.40894		137.125	-0.42725		137	-0.39063		137.25	-0.46997
	137.312	-0.39063		137.25	-0.44556		137.25	-0.42114		137.25	-0.46997
	137.406	-0.39673		137.375	-0.43945		137.25	-0.40283		137.5	-0.43335
	137.5	-0.38452		137.5	-0.45166		137.5	-0.36011		137.5	-0.44556
	137.609	-0.39063		137.5	-0.48218		137.5	-0.37231		137.5	-0.46387
	137.703	-0.37231		137.625	-0.40894		137.5	-0.40283		137.75	-0.45166
	137.812	-0.38452		137.75	-0.41504		137.75	-0.3479		137.75	-0.47607
	137.906	-0.36621		137.875	-0.40283		137.75	-0.42725		138	-0.45166
	138	-0.36621		138	-0.3418		138	-0.41504		138	-0.46387
	138.109	-0.3479		138	-0.40894		138	-0.37231		138	-0.45776
	138.203	-0.354		138.125	-0.40894		138	-0.36621		138.25	-0.46997
	138.312	-0.3479		138.25	-0.42114		138.25	-0.37842		138.25	-0.46997
	138.406	-0.3479		138.375	-0.41504		138.25	-0.37231		138.5	-0.47607
	138.5	-0.3418		138.5	-0.42114		138.5	-0.37842		138.5	-0.46997
	138.609	-0.31738		138.5	-0.39063		138.5	-0.38452		138.5	-0.43335
	138.703	-0.37842		138.625	-0.36621		138.5	-0.37231		138.75	-0.46997
	138.812	-0.32959		138.75	-0.32959		138.75	-0.41504		138.75	-0.46387
	138.906	-0.3418		138.875	-0.31128		138.75	-0.36621		139	-0.45166
	139	-0.3479		139	-0.37842		139	-0.37842		139	-0.42725
	139.109	-0.3479		139	-0.33569		139	-0.37842		139	-0.44556
	139.203	-0.33569		139.125	-0.39063		139	-0.37842		139.25	-0.40894
	139.312	-0.36011		139.25	-0.39063		139.25	-0.39063		139.25	-0.37842
	139.406	-0.33569		139.375	-0.39673		139.25	-0.37842		139.5	-0.40283
	139.5	-0.33569		139.5	-0.36621		139.5	-0.36621		139.5	-0.40283
	139.609	-0.3418		139.5	-0.37231		139.5	-0.39673		139.5	-0.42114
	139.703	-0.33569		139.625	-0.37842		139.5	-0.45166		139.75	-0.40283
	139.812	-0.38452		139.75	-0.39063		139.75	-0.39063		139.75	-0.41504
	139.906	-0.3418		139.875	-0.42725		139.75	-0.40283		140	-0.40283
	140	-0.3418		140	-0.41504		140	-0.36011		140	-0.42114
	140.109	-0.39673		140	-0.41504		140	-0.36621		140	-0.37231
	140.203	-0.39673		140.125	-0.38452		140	-0.40283		140.25	-0.37231
	140.312	-0.36621		140.25	-0.42725		140.25	-0.37842		140.25	-0.36621
	140.406	-0.39063		140.375	-0.40894		140.25	-0.40283		140.5	-0.33569
	140.5	-0.38452		140.5	-0.40894		140.5	-0.41504		140.5	-0.39063
	140.609	-0.36621		140.5	-0.40283		140.5	-0.45166		140.5	-0.36011
	140.703	-0.40894		140.625	-0.42114		140.5	-0.42114		140.75	-0.37231
	140.812	-0.37842		140.75	-0.45166		140.75	-0.43335		140.75	-0.37842
	140.906	-0.39673		140.875	-0.42725		140.75	-0.40894		141	-0.38452
	141	-0.40283		141	-0.42725		141	-0.39673		141	-0.36011
	141.109	-0.37842		141	-0.43335		141	-0.39673		141	-0.40283
	141.203	-0.40283		141.125	-0.44556		141	-0.36621		141.25	-0.38452
	141.312	-0.42114		141.25	-0.43335		141.25	-0.39673		141.25	-0.3418
	141.406	-0.40283		141.375	-0.48218		141.25	-0.37842		141.5	-0.37842
	141.5	-0.41504		141.5	-0.45776		141.5	-0.40894		141.5	-0.36011
	141.609	-0.44556		141.5	-0.42114		141.5	-0.37231		141.5	-0.39673
	141.703	-0.38452		141.625	-0.46387		141.5	-0.38452		141.75	-0.40283
	141.812	-0.42114		141.75	-0.43945		141.75	-0.39063		141.75	-0.39063
	141.906	-0.42725		141.875	-0.42114		141.75	-0.38452		142	-0.40894
	142	-0.39063		142	-0.42114		142	-0.37231		142	-0.45166
	142.109	-0.40894		142	-0.42114		142	-0.37842		142	-0.37842
	142.203	-0.43335		142.125	-0.42725		142	-0.38452		142.25	-0.39673
	142.312	-0.42114		142.25	-0.46997		142.25	-0.36621		142.25	-0.39063
	142.406	-0.40283		142.375	-0.42725		142.25	-0.42725		142.5	-0.36011
	142.5	-0.42725		142.5	-0.43335		142.5	-0.40283		142.5	-0.37231
	142.609	-0.40894		142.5	-0.44556		142.5	-0.43335		142.5	-0.37231
	142.703	-0.43335		142.625	-0.39673		142.5	-0.42114		142.75	-0.354
	142.812	-0.39673		142.75	-0.46997		142.75	-0.42114		142.75	-0.39673
	142.906	-0.41504		142.875	-0.45166		142.75	-0.40283		143	-0.39673
	143	-0.43335		143	-0.40283		143	-0.39673		143	-0.3479
	143.109	-0.42114		143	-0.41504		143	-0.42114		143	-0.37842
	143.203	-0.43335		143.125	-0.43335		143	-0.43945		143.25	-0.39673
	143.312	-0.39673		143.25	-0.37842		143.25	-0.42114		143.25	-0.40283
	143.406	-0.39673		143.375	-0.41504		143.25	-0.39673		143.5	-0.42725
	143.5	-0.37842		143.5	-0.43335		143.5	-0.46997		143.5	-0.38452
	143.609	-0.43335		143.5	-0.39673		143.5	-0.45166		143.5	-0.40283
	143.703	-0.40894		143.625	-0.43945		143.5	-0.45166		143.75	-0.39673
	143.812	-0.42114		143.75	-0.39063		143.75	-0.45166		143.75	-0.40283
	143.906	-0.39673		143.875	-0.40894		143.75	-0.40283		144	-0.39063
	144	-0.40283		144	-0.43335		144	-0.39673		144	-0.43335
	144.109	-0.39673		144	-0.40894		144	-0.43335		144	-0.39673
	144.203	-0.36621		144.125	-0.38452		144	-0.40283		144.25	-0.40283
	144.312	-0.40894		144.25	-0.40283		144.25	-0.39673		144.25	-0.42725
	144.406	-0.36621		144.375	-0.39063		144.25	-0.42114		144.5	-0.38452
	144.5	-0.39673		144.5	-0.39063		144.5	-0.37231		144.5	-0.44556
	144.609	-0.37842		144.5	-0.43945		144.5	-0.42114		144.5	-0.43335
	144.703	-0.39063		144.625	-0.39063		144.5	-0.40283		144.75	-0.43335
	144.812	-0.39063		144.75	-0.43335		144.75	-0.40283		144.75	-0.41504
	144.906	-0.39673		144.875	-0.41504		144.75	-0.42725		145	-0.41504
	145	-0.38452		145	-0.354		145	-0.40283		145	-0.42725
	145.109	-0.37842		145	-0.3418		145	-0.3418		145	-0.43335
	145.203	-0.41504		145.125	-0.36011		145	-0.36011		145.25	-0.43335
	145.312	-0.36011		145.25	-0.354		145.25	-0.36621		145.25	-0.39673
	145.406	-0.39673		145.375	-0.3418		145.25	-0.33569		145.5	-0.46387
	145.5	-0.36011		145.5	-0.354		145.5	-0.354		145.5	-0.43335
	145.609	-0.37231		145.5	-0.354		145.5	-0.354		145.5	-0.43945
	145.703	-0.40894		145.625	-0.40894		145.5	-0.32349		145.75	-0.42114
	145.812	-0.39063		145.75	-0.37842		145.75	-0.32959		145.75	-0.42725
	145.906	-0.3479		145.875	-0.37231		145.75	-0.31738		146	-0.40894
	146	-0.39063		146	-0.36621		146	-0.32959		146	-0.42725
	146.109	-0.42114		146	-0.37842		146	-0.32959		146	-0.45166
	146.203	-0.37842		146.125	-0.37842		146	-0.32349		146.25	-0.42114
	146.312	-0.42114		146.25	-0.37842		146.25	-0.32349		146.25	-0.43945
	146.406	-0.36011		146.375	-0.37842		146.25	-0.38452		146.5	-0.42114
	146.5	-0.354		146.5	-0.36011		146.5	-0.3479		146.5	-0.40894
	146.609	-0.36011		146.5	-0.40894		146.5	-0.36011		146.5	-0.37231
	146.703	-0.354		146.625	-0.37231		146.5	-0.33569		146.75	-0.39063
	146.812	-0.354		146.75	-0.37842		146.75	-0.32349		146.75	-0.36621
	146.906	-0.37231		146.875	-0.354		146.75	-0.37231		147	-0.3479
	147	-0.36011		147	-0.40283		147	-0.36621		147	-0.33569
	147.109	-0.36011		147	-0.38452		147	-0.354		147	-0.29297
	147.203	-0.39673		147.125	-0.38452		147	-0.3418		147.25	-0.33569
	147.312	-0.354		147.25	-0.39673		147.25	-0.36621		147.25	-0.32959
	147.406	-0.42114		147.375	-0.33569		147.25	-0.32959		147.5	-0.36621
	147.5	-0.40894		147.5	-0.354		147.5	-0.36621		147.5	-0.37231
	147.609	-0.36011		147.5	-0.32959		147.5	-0.33569		147.5	-0.36011
	147.703	-0.40894		147.625	-0.30518		147.5	-0.32349		147.75	-0.32349
	147.812	-0.43945		147.75	-0.07324		147.75	-0.36621		147.75	-0.37231
	147.906	-0.40894		147.875	0.24414		147.75	-0.3479		148	-0.33569
	148	-0.43335		148	0.45166		148	-0.41504		148	-0.29907
	148.109	-0.45166		148	0.56763		148	-0.39673		148	-0.36011
	148.203	-0.40894		148.125	0.73242		148	-0.42114		148.25	-0.32349
	148.312	-0.45776		148.25	1.10474		148.25	-0.39673		148.25	-0.3479
	148.406	-0.42114		148.375	1.50146		148.25	-0.42114		148.5	-0.36621
	148.5	-0.44556		148.5	1.65405		148.5	-0.39063		148.5	-0.37842
	148.609	-0.45776		148.5	1.36108		148.5	-0.40283		148.5	-0.36621
	148.703	-0.46387		148.625	0.78125		148.5	-0.41504		148.75	-0.38452
	148.812	-0.45776		148.75	0.18311		148.75	-0.39063		148.75	-0.32959
	148.906	-0.46387		148.875	-0.28687		148.75	-0.42114		149	-0.3418
	149	-0.46997		149	-0.6897		149	-0.39673		149	-0.38452
	149.109	-0.42725		149	-0.96436		149	-0.43945		149	-0.3479
	149.203	-0.48828		149.125	-1.18408		149	-0.38452		149.25	-0.40894
	149.312	-0.45776		149.25	-1.37329		149.25	-0.42725		149.25	-0.36621
	149.406	-0.46997		149.375	-1.44653		149.25	-0.43945		149.5	-0.33569
	149.5	-0.44556		149.5	-1.48926		149.5	-0.43335		149.5	-0.37231
	149.609	-0.40894		149.5	-1.51367		149.5	-0.40283		149.5	-0.40283
	149.703	-0.44556		149.625	-1.45874		149.5	-0.39673		149.75	-0.37231
	149.812	-0.45776		149.75	-1.50146		149.75	-0.40894		149.75	-0.39673
	149.906	-0.43335		149.875	-1.58691		149.75	-0.38452		150	-0.40283
	150	-0.42725		150	-1.60522		150	-0.39673		150	-0.38452
	150.109	-0.40894		150	-1.64185		150	-0.36621		150	-0.45166
	150.203	-0.43945		150.125	-1.62354		150	-0.40894		150.25	-0.37842
	150.312	-0.42114		150.25	-1.48315		150.25	-0.37842		150.25	-0.37842
	150.406	-0.42114		150.375	-1.40991		150.25	-0.39063		150.5	-0.39673
	150.5	-0.43335		150.5	-1.24512		150.5	-0.42114		150.5	-0.39063
	150.609	-0.44556		150.5	-1.06201		150.5	-0.40894		150.5	-0.42114
	150.703	-0.40894		150.625	-0.95825		150.5	-0.42114		150.75	-0.45166
	150.812	-0.40283		150.75	-0.81177		150.75	-0.41504		150.75	-0.40894
	150.906	-0.41504		150.875	-0.64087		150.75	-0.43945		151	-0.41504
	151	-0.45166		151	-0.56152		151	-0.39063		151	-0.43335
	151.109	-0.39673		151	-0.5188		151	-0.44556		151	-0.42114
	151.203	-0.40283		151.125	-0.45776		151	-0.37842		151.25	-0.42114
	151.312	-0.40283		151.25	-0.48828		151.25	-0.40283		151.25	-0.43335
	151.406	-0.39063		151.375	-0.40283		151.25	-0.39063		151.5	-0.37842
	151.5	-0.3479		151.5	-0.37842		151.5	-0.37842		151.5	-0.37231
	151.609	-0.37231		151.5	-0.354		151.5	-0.41504		151.5	-0.40894
	151.703	-0.38452		151.625	-0.31738		151.5	-0.39673		151.75	-0.42114
	151.812	-0.354		151.75	-0.31128		151.75	-0.40283		151.75	-0.42114
	151.906	-0.40283		151.875	-0.28687		151.75	-0.42114		152	-0.45166
	152	-0.36011		152	-0.28687		152	-0.43335		152	-0.41504
	152.109	-0.37231		152	-0.26245		152	-0.37231		152	-0.43335
	152.203	-0.40283		152.125	-0.3418		152	-0.40894		152.25	-0.42114
	152.312	-0.38452		152.25	-0.30518		152.25	-0.38452		152.25	-0.43335
	152.406	-0.36011		152.375	-0.3479		152.25	-0.37842		152.5	-0.40894
	152.5	-0.37842		152.5	-0.31738		152.5	-0.41504		152.5	-0.39063
	152.609	-0.39673		152.5	-0.29907		152.5	-0.37231		152.5	-0.38452
	152.703	-0.38452		152.625	-0.32349		152.5	-0.39063		152.75	-0.41504
	152.812	-0.40283		152.75	-0.3479		152.75	-0.40283		152.75	-0.43945
	152.906	-0.33569		152.875	-0.354		152.75	-0.39063		153	-0.40283
	153	-0.39063		153	-0.31738		153	-0.3418		153	-0.43335
	153.109	-0.40283		153	-0.33569		153	-0.37842		153	-0.39063
	153.203	-0.36011		153.125	-0.31128		153	-0.3418		153.25	-0.40894
	153.312	-0.37842		153.25	-0.37231		153.25	-0.39063		153.25	-0.37231
	153.406	-0.37842		153.375	-0.3479		153.25	-0.41504		153.5	-0.37842
	153.5	-0.354		153.5	-0.37842		153.5	-0.3479		153.5	-0.37842
	153.609	-0.39063		153.5	-0.37842		153.5	-0.36621		153.5	-0.37231
	153.703	-0.43945		153.625	-0.39673		153.5	-0.38452		153.75	-0.40894
	153.812	-0.37842		153.75	-0.40283		153.75	-0.3418		153.75	-0.39673
	153.906	-0.43335		153.875	-0.42725		153.75	-0.37842		154	-0.40283
	154	-0.41504		154	-0.46997		154	-0.42114		154	-0.38452
	154.109	-0.38452		154	-0.43335		154	-0.39673		154	-0.40283
	154.203	-0.38452		154.125	-0.45166		154	-0.42114		154.25	-0.354
	154.312	-0.354		154.25	-0.39673		154.25	-0.39673		154.25	-0.354
	154.406	-0.36621		154.375	-0.37842		154.25	-0.37842		154.5	-0.36621
	154.5	-0.39063		154.5	-0.36621		154.5	-0.43945		154.5	-0.39063
	154.609	-0.39673		154.5	-0.40894		154.5	-0.40894		154.5	-0.39673
	154.703	-0.38452		154.625	-0.40894		154.5	-0.40894		154.75	-0.3479
	154.812	-0.42114		154.75	-0.36621		154.75	-0.38452		154.75	-0.38452
	154.906	-0.39063		154.875	-0.37231		154.75	-0.41504		155	-0.354
	155	-0.43335		155	-0.354		155	-0.42114		155	-0.36011
	155.109	-0.42725		155	-0.40894		155	-0.45166		155	-0.37842
	155.203	-0.39063		155.125	-0.44556		155	-0.39063		155.25	-0.3418
	155.312	-0.39063		155.25	-0.44556		155.25	-0.39673		155.25	-0.31738
	155.406	-0.38452		155.375	-0.43335		155.25	-0.43945		155.5	-0.3479
	155.5	-0.40894		155.5	-0.44556		155.5	-0.42114		155.5	-0.37231
	155.609	-0.42114		155.5	-0.39063		155.5	-0.46387		155.5	-0.36011
	155.703	-0.45776		155.625	-0.40894		155.5	-0.46997		155.75	-0.42725
	155.812	-0.38452		155.75	-0.45166		155.75	-0.49438		155.75	-0.39063
	155.906	-0.40283		155.875	-0.40894		155.75	-0.45776		156	-0.43335
	156	-0.42114		156	-0.45776		156	-0.45166		156	-0.41504
	156.109	-0.46997		156	-0.43335		156	-0.43335		156	-0.37842
	156.203	-0.43945		156.125	-0.40283		156	-0.42725		156.25	-0.38452
	156.312	-0.42114		156.25	-0.41504		156.25	-0.46387		156.25	-0.42114
	156.406	-0.40894		156.375	-0.39673		156.25	-0.45166		156.5	-0.43335
	156.5	-0.42725		156.5	-0.37231		156.5	-0.46997		156.5	-0.43945
	156.609	-0.45776		156.5	-0.42114		156.5	-0.43945		156.5	-0.46387
	156.703	-0.46997		156.625	-0.46387		156.5	-0.46997		156.75	-0.39673
	156.812	-0.47607		156.75	-0.44556		156.75	-0.45166		156.75	-0.43945
	156.906	-0.46387		156.875	-0.5188		156.75	-0.46387		157	-0.43945
	157	-0.43945		157	-0.45776		157	-0.43945		157	-0.41504
	157.109	-0.44556		157	-0.48218		157	-0.43335		157	-0.45776
	157.203	-0.44556		157.125	-0.48218		157	-0.45166		157.25	-0.43945
	157.312	-0.39673		157.25	-0.44556		157.25	-0.40283		157.25	-0.45166
	157.406	-0.39673		157.375	-0.45166		157.25	-0.40283		157.5	-0.46387
	157.5	-0.41504		157.5	-0.45166		157.5	-0.39673		157.5	-0.44556
	157.609	-0.354		157.5	-0.43335		157.5	-0.43335		157.5	-0.42725
	157.703	-0.37231		157.625	-0.43335		157.5	-0.40894		157.75	-0.48218
	157.812	-0.37842		157.75	-0.45166		157.75	-0.44556		157.75	-0.42725
	157.906	-0.37842		157.875	-0.38452		157.75	-0.40894		158	-0.46997
	158	-0.354		158	-0.43335		158	-0.38452		158	-0.45776
	158.109	-0.36621		158	-0.43335		158	-0.39063		158	-0.45776
	158.203	-0.3418		158.125	-0.37231		158	-0.354		158.25	-0.46387
	158.312	-0.32959		158.25	-0.39063		158.25	-0.38452		158.25	-0.50049
	158.406	-0.36621		158.375	-0.354		158.25	-0.39063		158.5	-0.45776
	158.5	-0.37231		158.5	-0.31128		158.5	-0.39673		158.5	-0.45776
	158.609	-0.37842		158.5	-0.33569		158.5	-0.36621		158.5	-0.45166
	158.703	-0.3479		158.625	-0.36011		158.5	-0.39063		158.75	-0.42725
	158.812	-0.29907		158.75	-0.31738		158.75	-0.36621		158.75	-0.48218
	158.906	-0.32349		158.875	-0.32349		158.75	-0.39673		159	-0.47607
	159	-0.3418		159	-0.30518		159	-0.39063		159	-0.44556
	159.109	-0.31738		159	-0.32959		159	-0.354		159	-0.47607
	159.203	-0.354		159.125	-0.3418		159	-0.42114		159.25	-0.48218
	159.312	-0.36011		159.25	-0.31738		159.25	-0.42114		159.25	-0.45166
	159.406	-0.30518		159.375	-0.32349		159.25	-0.39673		159.5	-0.41504
	159.5	-0.37231		159.5	-0.354		159.5	-0.38452		159.5	-0.37842
	159.609	-0.354		159.5	-0.354		159.5	-0.41504		159.5	-0.36011
	159.703	-0.354		159.625	-0.32959		159.5	-0.37231		159.75	-0.39063
	159.812	-0.37231		159.75	-0.354		159.75	-0.40894		159.75	-0.3418
	159.906	-0.36011		159.875	-0.32959		159.75	-0.354		160	-0.38452
	160	-0.3479		160	-0.36621		160	-0.36011		160	-0.39673
	160.109	-0.3418		160	-0.3479		160	-0.39673		160	-0.39673
	160.203	-0.36011		160.125	-0.354		160	-0.3418		160.25	-0.39063
	160.312	-0.33569		160.25	-0.41504		160.25	-0.37231		160.25	-0.39063
	160.406	-0.39673		160.375	-0.43335		160.25	-0.37231		160.5	-0.41504
	160.5	-0.36011		160.5	-0.45166		160.5	-0.36621		160.5	-0.39673
	160.609	-0.40894		160.5	-0.43945		160.5	-0.36011		160.5	-0.42725
	160.703	-0.42725		160.625	-0.45776		160.5	-0.40283		160.75	-0.41504
	160.812	-0.39063		160.75	-0.42725		160.75	-0.32959		160.75	-0.41504
	160.906	-0.37231		160.875	-0.45776		160.75	-0.39063		161	-0.40283
	161	-0.38452		161	-0.40894		161	-0.43945		161	-0.39673
	161.109	-0.39673		161	-0.42114		161	-0.41504		161	-0.41504
	161.203	-0.42725		161.125	-0.40283		161	-0.42725		161.25	-0.40283
	161.312	-0.46387		161.25	-0.38452		161.25	-0.41504		161.25	-0.42114
	161.406	-0.38452		161.375	-0.38452		161.25	-0.41504		161.5	-0.39063
	161.5	-0.40894		161.5	-0.36621		161.5	-0.41504		161.5	-0.40283
	161.609	-0.40283		161.5	-0.42725		161.5	-0.43945		161.5	-0.37231
	161.703	-0.40894		161.625	-0.40283		161.5	-0.43335		161.75	-0.38452
	161.812	-0.41504		161.75	-0.43945		161.75	-0.44556		161.75	-0.37842
	161.906	-0.40283		161.875	-0.47607		161.75	-0.42114		162	-0.36011
	162	-0.41504		162	-0.43945		162	-0.40894		162	-0.37842
	162.109	-0.39673		162	-0.42725		162	-0.42114		162	-0.38452
	162.203	-0.43335		162.125	-0.46387		162	-0.42114		162.25	-0.40283
	162.312	-0.40283		162.25	-0.50049		162.25	-0.41504		162.25	-0.36621
	162.406	-0.43945		162.375	-0.47607		162.25	-0.42114		162.5	-0.40894
	162.5	-0.41504		162.5	-0.5188		162.5	-0.42114		162.5	-0.37842
	162.609	-0.40283		162.5	-0.45776		162.5	-0.40894		162.5	-0.39063
	162.703	-0.39673		162.625	-0.48218		162.5	-0.43945		162.75	-0.37842
	162.812	-0.39063		162.75	-0.48218		162.75	-0.44556		162.75	-0.3418
	162.906	-0.41504		162.875	-0.45776		162.75	-0.41504		163	-0.36621
	163	-0.40894		163	-0.43335		163	-0.42114		163	-0.40283
	163.109	-0.45776		163	-0.40894		163	-0.40283		163	-0.40894
	163.203	-0.41504		163.125	-0.39673		163	-0.41504		163.25	-0.39673
	163.312	-0.43945		163.25	-0.42725		163.25	-0.40283		163.25	-0.41504
	163.406	-0.42725		163.375	-0.44556		163.25	-0.42114		163.5	-0.3479
	163.5	-0.42725		163.5	-0.37231		163.5	-0.39673		163.5	-0.43335
	163.609	-0.40894		163.5	-0.42725		163.5	-0.39673		163.5	-0.40894
	163.703	-0.44556		163.625	-0.40283		163.5	-0.40894		163.75	-0.36621
	163.812	-0.41504		163.75	-0.37231		163.75	-0.41504		163.75	-0.38452
	163.906	-0.40283		163.875	-0.36011		163.75	-0.43945		164	-0.37842
	164	-0.44556		164	-0.354		164	-0.40283		164	-0.37842
	164.109	-0.40894		164	-0.36621		164	-0.43335		164	-0.41504
	164.203	-0.43945		164.125	-0.40894		164	-0.40894		164.25	-0.47607
	164.312	-0.40894		164.25	-0.38452		164.25	-0.41504		164.25	-0.42725
	164.406	-0.41504		164.375	-0.3479		164.25	-0.37231		164.5	-0.46997
	164.5	-0.39063		164.5	-0.37231		164.5	-0.39063		164.5	-0.42114
	164.609	-0.37842		164.5	-0.32959		164.5	-0.38452		164.5	-0.43945
	164.703	-0.37842		164.625	-0.39673		164.5	-0.37231		164.75	-0.45776
	164.812	-0.40283		164.75	-0.40283		164.75	-0.39673		164.75	-0.41504
	164.906	-0.43335		164.875	-0.39673		164.75	-0.32959		165	-0.43945
	165	-0.3479		165	-0.36011		165	-0.36011		165	-0.43945
	165.109	-0.41504		165	-0.37842		165	-0.354		165	-0.46387
	165.203	-0.40283		165.125	-0.36011		165	-0.37231		165.25	-0.45776
	165.312	-0.39063		165.25	-0.38452		165.25	-0.32959		165.25	-0.48218
	165.406	-0.39673		165.375	-0.40283		165.25	-0.354		165.5	-0.40894
	165.5	-0.37842		165.5	-0.3418		165.5	-0.32959		165.5	-0.44556
	165.609	-0.36621		165.5	-0.38452		165.5	-0.33569		165.5	-0.43945
	165.703	-0.40894		165.625	-0.40283		165.5	-0.36011		165.75	-0.40894
	165.812	-0.41504		165.75	-0.36621		165.75	-0.30518		165.75	-0.44556
	165.906	-0.354		165.875	-0.37231		165.75	-0.3418		166	-0.42114
	166	-0.39673		166	-0.37842		166	-0.31128		166	-0.42725
	166.109	-0.3418		166	-0.39063		166	-0.30518		166	-0.40894
	166.203	-0.354		166.125	-0.39673		166	-0.31738		166.25	-0.40283
	166.312	-0.3418		166.25	-0.36621		166.25	-0.3418		166.25	-0.36621
	166.406	-0.3479		166.375	-0.354		166.25	-0.31128		166.5	-0.40283
	166.5	-0.37231		166.5	-0.40894		166.5	-0.36621		166.5	-0.36621
	166.609	-0.39673		166.5	-0.37231		166.5	-0.37842		166.5	-0.36621
	166.703	-0.37842		166.625	-0.40283		166.5	-0.32349		166.75	-0.38452
	166.812	-0.36011		166.75	-0.41504		166.75	-0.39673		166.75	-0.32959
	166.906	-0.36011		166.875	-0.37842		166.75	-0.36011		167	-0.37842
	167	-0.354		167	-0.37842		167	-0.36011		167	-0.37842
	167.109	-0.39063		167	-0.38452		167	-0.354		167	-0.37842
	167.203	-0.43335		167.125	-0.37842		167	-0.36011		167.25	-0.39063
	167.312	-0.37231		167.25	-0.37231		167.25	-0.354		167.25	-0.39673
	167.406	-0.38452		167.375	-0.40894		167.25	-0.38452		167.5	-0.36011
	167.5	-0.37842		167.5	-0.39063		167.5	-0.36621		167.5	-0.3479
	167.609	-0.39063		167.5	-0.39673		167.5	-0.36621		167.5	-0.36621
	167.703	-0.41504		167.625	-0.37231		167.5	-0.39063		167.75	-0.36621
	167.812	-0.42114		167.75	-0.40283		167.75	-0.32349		167.75	-0.36011
	167.906	-0.37842		167.875	-0.41504		167.75	-0.38452		168	-0.32959
	168	-0.44556		168	-0.38452		168	-0.40283		168	-0.33569
	168.109	-0.42114		168	-0.41504		168	-0.37231		168	-0.33569
	168.203	-0.43945		168.125	-0.42114		168	-0.36011		168.25	-0.33569
	168.312	-0.44556		168.25	-0.46387		168.25	-0.39673		168.25	-0.32349
	168.406	-0.44556		168.375	-0.43945		168.25	-0.37842		168.5	-0.36011
	168.5	-0.45166		168.5	-0.46387		168.5	-0.41504		168.5	-0.3479
	168.609	-0.45166		168.5	-0.45166		168.5	-0.44556		168.5	-0.354
	168.703	-0.47607		168.625	-0.43335		168.5	-0.37842		168.75	-0.38452
	168.812	-0.43335		168.75	-0.41504		168.75	-0.42114		168.75	-0.36621
	168.906	-0.47607		168.875	-0.40283		168.75	-0.37231		169	-0.40894
	169	-0.46387		169	-0.42725		169	-0.39063		169	-0.39063
	169.109	-0.45166		169	-0.39063		169	-0.39673		169	-0.42114
	169.203	-0.43945		169.125	-0.43945		169	-0.38452		169.25	-0.37842
	169.312	-0.45166		169.25	-0.41504		169.25	-0.38452		169.25	-0.37231
	169.406	-0.45776		169.375	-0.41504		169.25	-0.39673		169.5	-0.39063
	169.5	-0.43945		169.5	-0.43335		169.5	-0.39063		169.5	-0.40283
	169.609	-0.46387		169.5	-0.42725		169.5	-0.36011		169.5	-0.41504
	169.703	-0.43945		169.625	-0.43945		169.5	-0.42114		169.75	-0.40283
	169.812	-0.45776		169.75	-0.45166		169.75	-0.37231		169.75	-0.42725
	169.906	-0.43945		169.875	-0.45776		169.75	-0.38452		170	-0.38452
	170	-0.45776		170	-0.40283		170	-0.42725		170	-0.42725
	170.109	-0.43945		170	-0.43335		170	-0.41504		170	-0.38452
	170.203	-0.45166		170.125	-0.354		170	-0.41504		170.25	-0.39673
	170.312	-0.42114		170.25	-0.39063		170.25	-0.40894		170.25	-0.39063
	170.406	-0.41504		170.375	-0.40894		170.25	-0.43335		170.5	-0.39673
	170.5	-0.43945		170.5	-0.40894		170.5	-0.43335		170.5	-0.44556
	170.609	-0.38452		170.5	-0.42725		170.5	-0.43335		170.5	-0.40894
	170.703	-0.42725		170.625	-0.39673		170.5	-0.42114		170.75	-0.41504
	170.812	-0.39673		170.75	-0.354		170.75	-0.42725		170.75	-0.41504
	170.906	-0.40283		170.875	-0.354		170.75	-0.39063		171	-0.42114
	171	-0.39673		171	-0.354		171	-0.39673		171	-0.38452
	171.109	-0.39673		171	-0.29297		171	-0.39673		171	-0.42725
	171.203	-0.40283		171.125	-0.3479		171	-0.39673		171.25	-0.39673
	171.312	-0.43335		171.25	-0.31738		171.25	-0.42725		171.25	-0.38452
	171.406	-0.41504		171.375	-0.31128		171.25	-0.42725		171.5	-0.41504
	171.5	-0.36621		171.5	-0.32349		171.5	-0.44556		171.5	-0.38452
	171.609	-0.45166		171.5	-0.31128		171.5	-0.40894		171.5	-0.39063
	171.703	-0.39673		171.625	-0.32959		171.5	-0.42725		171.75	-0.40894
	171.812	-0.39673		171.75	-0.33569		171.75	-0.42114		171.75	-0.41504
	171.906	-0.39063		171.875	-0.32959		171.75	-0.42114		172	-0.40894
	172	-0.37231		172	-0.31738		172	-0.40283		172	-0.43945
	172.109	-0.39063		172	-0.36621		172	-0.42114		172	-0.39673
	172.203	-0.41504		172.125	-0.36011		172	-0.38452		172.25	-0.44556
	172.312	-0.39063		172.25	-0.39673		172.25	-0.36011		172.25	-0.45776
	172.406	-0.37842		172.375	-0.40894		172.25	-0.40283		172.5	-0.38452
	172.5	-0.41504		172.5	-0.354		172.5	-0.37231		172.5	-0.42114
	172.609	-0.36621		172.5	-0.37231		172.5	-0.39063		172.5	-0.39063
	172.703	-0.39063		172.625	-0.37231		172.5	-0.36621		172.75	-0.37231
	172.812	-0.37842		172.75	-0.354		172.75	-0.37231		172.75	-0.40283
	172.906	-0.38452		172.875	-0.354		172.75	-0.36011		173	-0.42725
	173	-0.40283		173	-0.41504		173	-0.37231		173	-0.37842
	173.109	-0.42114		173	-0.38452		173	-0.3418		173	-0.39673
	173.203	-0.37231		173.125	-0.40894		173	-0.36621		173.25	-0.40894
	173.312	-0.40894		173.25	-0.36621		173.25	-0.37842		173.25	-0.39673
	173.406	-0.40894		173.375	-0.37231		173.25	-0.31738		173.5	-0.44556
	173.5	-0.40283		173.5	-0.39673		173.5	-0.37231		173.5	-0.38452
	173.609	-0.41504		173.5	-0.37842		173.5	-0.36011		173.5	-0.39673
	173.703	-0.39063		173.625	-0.38452		173.5	-0.38452		173.75	-0.38452
	173.812	-0.37842		173.75	-0.3479		173.75	-0.40894		173.75	-0.37231
	173.906	-0.37842		173.875	-0.37842		173.75	-0.38452		174	-0.36011
	174	-0.37842		174	-0.37842		174	-0.3418		174	-0.37842
	174.109	-0.37842		174	-0.43335		174	-0.40283		174	-0.36621
	174.203	-0.39673		174.125	-0.40283		174	-0.41504		174.25	-0.38452
	174.312	-0.39673		174.25	-0.40894		174.25	-0.37842		174.25	-0.42114
	174.406	-0.36011		174.375	-0.40894		174.25	-0.43945		174.5	-0.354
	174.5	-0.39673		174.5	-0.39673		174.5	-0.39673		174.5	-0.41504
	174.609	-0.354		174.5	-0.40283		174.5	-0.42725		174.5	-0.38452
	174.703	-0.37842		174.625	-0.42114		174.5	-0.42114		174.75	-0.40283
	174.812	-0.38452		174.75	-0.44556		174.75	-0.38452		174.75	-0.37231
	174.906	-0.40283		174.875	-0.41504		174.75	-0.40894		175	-0.39063
	175	-0.39063		175	-0.40894		175	-0.44556		175	-0.354
	175.109	-0.39673		175	-0.42114		175	-0.43335		175	-0.39063
	175.203	-0.42114		175.125	-0.37231		175	-0.43945		175.25	-0.37231
	175.312	-0.37842		175.25	-0.3479		175.25	-0.46387		175.25	-0.36011
	175.406	-0.42725		175.375	-0.37842		175.25	-0.39063		175.5	-0.36621
	175.5	-0.40283		175.5	-0.41504		175.5	-0.42725		175.5	-0.37231
	175.609	-0.40894		175.5	-0.40894		175.5	-0.44556		175.5	-0.39063
	175.703	-0.40283		175.625	-0.43945		175.5	-0.42725		175.75	-0.40283
	175.812	-0.43335		175.75	-0.39673		175.75	-0.45166		175.75	-0.39063
	175.906	-0.43945		175.875	-0.40894		175.75	-0.45776		176	-0.36011
	176	-0.41504		176	-0.39673		176	-0.45776		176	-0.37231
	176.109	-0.43945		176	-0.39063		176	-0.45166		176	-0.38452
	176.203	-0.40894		176.125	-0.40283		176	-0.48218		176.25	-0.38452
	176.312	-0.46997		176.25	-0.40894		176.25	-0.45166		176.25	-0.38452
	176.406	-0.43945		176.375	-0.42114		176.25	-0.46997		176.5	-0.37842
	176.5	-0.42114		176.5	-0.43335		176.5	-0.43335		176.5	-0.38452
	176.609	-0.41504		176.5	-0.43335		176.5	-0.44556		176.5	-0.37231
	176.703	-0.43335		176.625	-0.39063		176.5	-0.45776		176.75	-0.39673
	176.812	-0.42114		176.75	-0.45776		176.75	-0.43945		176.75	-0.39673
	176.906	-0.43945		176.875	-0.40283		176.75	-0.45166		177	-0.43945
	177	-0.42114		177	-0.38452		177	-0.45776		177	-0.44556
	177.109	-0.39673		177	-0.40283		177	-0.45166		177	-0.45166
	177.203	-0.45776		177.125	-0.40283		177	-0.41504		177.25	-0.47607
	177.312	-0.39673		177.25	-0.42114		177.25	-0.44556		177.25	-0.46997
	177.406	-0.40894		177.375	-0.42725		177.25	-0.42114		177.5	-0.48218
	177.5	-0.40894		177.5	-0.40894		177.5	-0.45776		177.5	-0.46387
	177.609	-0.39063		177.5	-0.40283		177.5	-0.42725		177.5	-0.48218
	177.703	-0.39673		177.625	-0.43945		177.5	-0.43335		177.75	-0.43945
	177.812	-0.40894		177.75	-0.37842		177.75	-0.39673		177.75	-0.49438
	177.906	-0.37842		177.875	-0.40283		177.75	-0.39063		178	-0.46997
	178	-0.37842		178	-0.40283		178	-0.42725		178	-0.46387
	178.109	-0.42725		178	-0.36621		178	-0.43945		178	-0.53101
	178.203	-0.3418		178.125	-0.42725		178	-0.40894		178.25	-0.46387
	178.312	-0.36011		178.25	-0.42114		178.25	-0.40894		178.25	-0.47607
	178.406	-0.36621		178.375	-0.42725		178.25	-0.43335		178.5	-0.50049
	178.5	-0.3418		178.5	-0.41504		178.5	-0.43335		178.5	-0.50659
	178.609	-0.3418		178.5	-0.43335		178.5	-0.39673		178.5	-0.47607
	178.703	-0.36621		178.625	-0.37231		178.5	-0.36621		178.75	-0.50049
	178.812	-0.32349		178.75	-0.41504		178.75	-0.40283		178.75	-0.46997
	178.906	-0.3479		178.875	-0.39673		178.75	-0.39063		179	-0.44556
	179	-0.38452		179	-0.38452		179	-0.354		179	-0.45166
	179.109	-0.29907		179	-0.40283		179	-0.40283		179	-0.39673
	179.203	-0.36621		179.125	-0.36011		179	-0.37842		179.25	-0.46387
	179.312	-0.3418		179.25	-0.37231		179.25	-0.40894		179.25	-0.41504
	179.406	-0.32959		179.375	-0.36011		179.25	-0.40283		179.5	-0.37842
	179.5	-0.33569		179.5	-0.36621		179.5	-0.36011		179.5	-0.40283
	179.609	-0.33569		179.5	-0.32959		179.5	-0.36621		179.5	-0.42114
	179.703	-0.3479		179.625	-0.36621		179.5	-0.40894		179.75	-0.36011
	179.812	-0.37231		179.75	-0.31738		179.75	-0.39063		179.75	-0.39673
	179.906	-0.37842		179.875	-0.36621		179.75	-0.36621		180	-0.41504
	180	-0.36011		180	-0.42114		180	-0.42114		180	-0.36621
	180.109	-0.39673		180	-0.39673		180	-0.37842		180	-0.42114
	180.203	-0.33569		180.125	-0.41504		180	-0.40283		180.25	-0.39063
	180.312	-0.37231		180.25	-0.40894		180.25	-0.38452		180.25	-0.39673
	180.406	-0.39673		180.375	-0.40894		180.25	-0.36621		180.5	-0.37842
	180.5	-0.36011		180.5	-0.38452		180.5	-0.39673		180.5	-0.36011
	180.609	-0.36621		180.5	-0.41504		180.5	-0.39673		180.5	-0.3418
	180.703	-0.40283		180.625	-0.37842		180.5	-0.37842		180.75	-0.39673
	180.812	-0.40283		180.75	-0.39673		180.75	-0.39063		180.75	-0.37231
	180.906	-0.39063		180.875	-0.39673		180.75	-0.42114		181	-0.354
	181	-0.43945		181	-0.38452		181	-0.37231		181	-0.39063
	181.109	-0.40283		181	-0.39673		181	-0.44556		181	-0.3418
	181.203	-0.40894		181.125	-0.36621		181	-0.39063		181.25	-0.39673
	181.312	-0.41504		181.25	-0.40894		181.25	-0.39673		181.25	-0.37842
	181.406	-0.45166		181.375	-0.41504		181.25	-0.41504		181.5	-0.36011
	181.5	-0.43945		181.5	-0.45776		181.5	-0.36621		181.5	-0.38452
	181.609	-0.41504		181.5	-0.42114		181.5	-0.38452		181.5	-0.40283
	181.703	-0.40894		181.625	-0.45776		181.5	-0.37842		181.75	-0.36621
	181.812	-0.39063		181.75	-0.46387		181.75	-0.38452		181.75	-0.354
	181.906	-0.41504		181.875	-0.46997		181.75	-0.39673		182	-0.37231
	182	-0.39063		182	-0.47607		182	-0.42725		182	-0.354
	182.109	-0.42725		182	-0.5127		182	-0.37842		182	-0.40894
	182.203	-0.40283		182.125	-0.5127		182	-0.40894		182.25	-0.36621
	182.312	-0.39673		182.25	-0.5127		182.25	-0.39063		182.25	-0.37842
	182.406	-0.39063		182.375	-0.53101		182.25	-0.354		182.5	-0.40894
	182.5	-0.38452		182.5	-0.50049		182.5	-0.41504		182.5	-0.42114
	182.609	-0.38452		182.5	-0.47607		182.5	-0.40283		182.5	-0.39063
	182.703	-0.40283		182.625	-0.45776		182.5	-0.38452		182.75	-0.40894
	182.812	-0.43945		182.75	-0.42725		182.75	-0.40283		182.75	-0.42114
	182.906	-0.37231		182.875	-0.40283		182.75	-0.43945		183	-0.40283
	183	-0.39673		183	-0.41504		183	-0.41504		183	-0.42725
	183.109	-0.43335		183	-0.40894		183	-0.45776		183	-0.38452
	183.203	-0.42725		183.125	-0.37231		183	-0.41504		183.25	-0.40283
	183.312	-0.42114		183.25	-0.42114		183.25	-0.42725		183.25	-0.39063
	183.406	-0.43945		183.375	-0.39063		183.25	-0.44556		183.5	-0.41504
	183.5	-0.43945		183.5	-0.41504		183.5	-0.42725		183.5	-0.39063
	183.609	-0.43335		183.5	-0.37842		183.5	-0.42114		183.5	-0.37231
	183.703	-0.46997		183.625	-0.354		183.5	-0.39063		183.75	-0.41504
	183.812	-0.42725		183.75	-0.37231		183.75	-0.40283		183.75	-0.40283
	183.906	-0.43335		183.875	-0.36011		183.75	-0.39673		184	-0.40283
	184	-0.40894		184	-0.3479		184	-0.45776		184	-0.39673
	184.109	-0.37842		184	-0.33569		184	-0.39063		184	-0.37842
	184.203	-0.37231		184.125	-0.37842		184	-0.39063		184.25	-0.39673
	184.312	-0.39673		184.25	-0.3418		184.25	-0.38452		184.25	-0.41504
	184.406	-0.37231		184.375	-0.42725		184.25	-0.36621		184.5	-0.40283
	184.5	-0.39673		184.5	-0.39673		184.5	-0.39673		184.5	-0.39063
	184.609	-0.43945		184.5	-0.38452		184.5	-0.37842		184.5	-0.39673
	184.703	-0.40283		184.625	-0.40894		184.5	-0.42114		184.75	-0.40283
	184.812	-0.43945		184.75	-0.38452		184.75	-0.37842		184.75	-0.46387
	184.906	-0.41504		184.875	-0.42725		184.75	-0.37842		185	-0.42725
	185	-0.40894		185	-0.40894		185	-0.3479		185	-0.43335
	185.109	-0.40894		185	-0.42725		185	-0.37842		185	-0.42114
	185.203	-0.39673		185.125	-0.42114		185	-0.37842		185.25	-0.42725
	185.312	-0.3418		185.25	-0.43335		185.25	-0.39063		185.25	-0.39673
	185.406	-0.36621		185.375	-0.37842		185.25	-0.36621		185.5	-0.43945
	185.5	-0.39063		185.5	-0.42725		185.5	-0.33569		185.5	-0.43335
	185.609	-0.36011		185.5	-0.43945		185.5	-0.354		185.5	-0.40283
	185.703	-0.39673		185.625	-0.37842		185.5	-0.36621		185.75	-0.46387
	185.812	-0.3479		185.75	-0.40894		185.75	-0.38452		185.75	-0.42725
	185.906	-0.37231		185.875	-0.37842		185.75	-0.32959		186	-0.44556
	186	-0.36011		186	-0.37231		186	-0.32959		186	-0.42114
	186.109	-0.3479		186	-0.37842		186	-0.32959		186	-0.39673
	186.203	-0.37231		186.125	-0.39673		186	-0.32349		186.25	-0.39673
	186.312	-0.37842		186.25	-0.3418		186.25	-0.3479		186.25	-0.40283
	186.406	-0.3479		186.375	-0.37231		186.25	-0.36621		186.5	-0.38452
	186.5	-0.32349		186.5	-0.37842		186.5	-0.36621		186.5	-0.39063
	186.609	-0.37231		186.5	-0.37231		186.5	-0.36621		186.5	-0.37842
	186.703	-0.3479		186.625	-0.40283		186.5	-0.39673		186.75	-0.3418
	186.812	-0.38452		186.75	-0.37842		186.75	-0.39063		186.75	-0.39673
	186.906	-0.37842		186.875	-0.40894		186.75	-0.36011		187	-0.354
	187	-0.37842		187	-0.38452		187	-0.39673		187	-0.32959
	187.109	-0.39063		187	-0.40283		187	-0.37842		187	-0.32349
	187.203	-0.40283		187.125	-0.38452		187	-0.39063		187.25	-0.30518
	187.312	-0.40283		187.25	-0.43945		187.25	-0.40894		187.25	-0.31128
	187.406	-0.37231		187.375	-0.42725		187.25	-0.37842		187.5	-0.36621
	187.5	-0.39063		187.5	-0.41504		187.5	-0.37842		187.5	-0.37842
	187.609	-0.37842		187.5	-0.42725		187.5	-0.40283		187.5	-0.3479
	187.703	-0.43335		187.625	-0.37842		187.5	-0.36011		187.75	-0.39063
	187.812	-0.40894		187.75	-0.39063		187.75	-0.42114		187.75	-0.3418
	187.906	-0.42725		187.875	-0.39063		187.75	-0.38452		188	-0.37842
	188	-0.44556		188	-0.42114		188	-0.354		188	-0.39063
	188.109	-0.45166		188	-0.39063		188	-0.39063		188	-0.33569
	188.203	-0.46997		188.125	-0.40894		188	-0.40283		188.25	-0.3479
	188.312	-0.44556		188.25	-0.40894		188.25	-0.42725		188.25	-0.3479
	188.406	-0.49438		188.375	-0.42114		188.25	-0.41504		188.5	-0.354
	188.5	-0.45776		188.5	-0.44556		188.5	-0.41504		188.5	-0.37231
	188.609	-0.48828		188.5	-0.42725		188.5	-0.37231		188.5	-0.39673
	188.703	-0.47607		188.625	-0.43335		188.5	-0.42114		188.75	-0.33569
	188.812	-0.43945		188.75	-0.39063		188.75	-0.38452		188.75	-0.37842
	188.906	-0.41504		188.875	-0.40894		188.75	-0.37842		189	-0.38452
	189	-0.43945		189	-0.39673		189	-0.38452		189	-0.38452
	189.109	-0.42725		189	-0.42725		189	-0.36011		189	-0.37842
	189.203	-0.42114		189.125	-0.39063		189	-0.42114		189.25	-0.36011
	189.312	-0.47607		189.25	-0.39673		189.25	-0.43945		189.25	-0.40283
	189.406	-0.46387		189.375	-0.39063		189.25	-0.43335		189.5	-0.40283
	189.5	-0.46997		189.5	-0.37231		189.5	-0.42114		189.5	-0.42114
	189.609	-0.46997		189.5	-0.40283		189.5	-0.43945		189.5	-0.37842
	189.703	-0.46387		189.625	-0.43945		189.5	-0.37842		189.75	-0.43335
	189.812	-0.42725		189.75	-0.43335		189.75	-0.39673		189.75	-0.39063
	189.906	-0.46997		189.875	-0.40283		189.75	-0.37842		190	-0.41504
	190	-0.43335		190	-0.46387		190	-0.36621		190	-0.40894
	190.109	-0.46997		190	-0.42725		190	-0.42114		190	-0.38452
	190.203	-0.46997		190.125	-0.43945		190	-0.39063		190.25	-0.42114
	190.312	-0.40283		190.25	-0.45776		190.25	-0.37231		190.25	-0.41504
	190.406	-0.43945		190.375	-0.41504		190.25	-0.36621		190.5	-0.44556
	190.5	-0.45166		190.5	-0.40283		190.5	-0.39063		190.5	-0.40894
	190.609	-0.39673		190.5	-0.39063		190.5	-0.39063		190.5	-0.43945
	190.703	-0.42114		190.625	-0.39063		190.5	-0.43335		190.75	-0.42725
	190.812	-0.43335		190.75	-0.37842		190.75	-0.40283		190.75	-0.43335
	190.906	-0.39673		190.875	-0.40283		190.75	-0.39673		191	-0.41504
	191	-0.40894		191	-0.3418		191	-0.42725		191	-0.41504
	191.109	-0.40283		191	-0.37842		191	-0.39673		191	-0.43945
	191.203	-0.39673		191.125	-0.37842		191	-0.43945		191.25	-0.39063
	191.312	-0.45166		191.25	-0.36621		191.25	-0.42725		191.25	-0.39673
	191.406	-0.38452		191.375	-0.42114		191.25	-0.40283		191.5	-0.40283
	191.5	-0.40894		191.5	-0.42725		191.5	-0.39063		191.5	-0.41504
	191.609	-0.39673		191.5	-0.39673		191.5	-0.42114		191.5	-0.37231
	191.703	-0.39063		191.625	-0.41504		191.5	-0.40283		191.75	-0.39673
	191.812	-0.39063		191.75	-0.37231		191.75	-0.40894		191.75	-0.39063
	191.906	-0.38452		191.875	-0.31738		191.75	-0.39673		192	-0.42725
	192	-0.354		192	-0.3479		192	-0.37842		192	-0.39063
	192.109	-0.3479		192	-0.32959		192	-0.40894		192	-0.43335
	192.203	-0.40894		192.125	-0.36011		192	-0.38452		192.25	-0.42725
	192.312	-0.354		192.25	-0.41504		192.25	-0.40283		192.25	-0.42725
	192.406	-0.39673		192.375	-0.36011		192.25	-0.38452		192.5	-0.45776
	192.5	-0.40283		192.5	-0.37231		192.5	-0.38452		192.5	-0.42114
	192.609	-0.38452		192.5	-0.33569		192.5	-0.36011		192.5	-0.40894
	192.703	-0.37842		192.625	-0.33569		192.5	-0.37231		192.75	-0.42725
	192.812	-0.36621		192.75	-0.33569		192.75	-0.36621		192.75	-0.43335
	192.906	-0.37842		192.875	-0.36621		192.75	-0.3418		193	-0.41504
	193	-0.36621		193	-0.32349		193	-0.39673		193	-0.42114
	193.109	-0.40283		193	-0.36011		193	-0.40894		193	-0.39673
	193.203	-0.3479		193.125	-0.36011		193	-0.42114		193.25	-0.40283
	193.312	-0.39673		193.25	-0.31738		193.25	-0.37842		193.25	-0.42114
	193.406	-0.354		193.375	-0.37231		193.25	-0.40283		193.5	-0.38452
	193.5	-0.38452		193.5	-0.37842		193.5	-0.37231		193.5	-0.41504
	193.609	-0.39063		193.5	-0.36621		193.5	-0.37231		193.5	-0.39673
	193.703	-0.37842		193.625	-0.354		193.5	-0.38452		193.75	-0.39673
	193.812	-0.38452		193.75	-0.38452		193.75	-0.36011		193.75	-0.41504
	193.906	-0.39673		193.875	-0.37842		193.75	-0.37842		194	-0.39673
	194	-0.40894		194	-0.40283		194	-0.37842		194	-0.39063
	194.109	-0.36621		194	-0.39063		194	-0.37231		194	-0.40283
	194.203	-0.40283		194.125	-0.36621		194	-0.36621		194.25	-0.40283
	194.312	-0.36621		194.25	-0.39063		194.25	-0.42114		194.25	-0.3479
	194.406	-0.37842		194.375	-0.354		194.25	-0.38452		194.5	-0.39063
	194.5	-0.37842		194.5	-0.37231		194.5	-0.41504		194.5	-0.33569
	194.609	-0.39063		194.5	-0.37842		194.5	-0.40894		194.5	-0.354
	194.703	-0.36621		194.625	-0.37231		194.5	-0.42114		194.75	-0.37231
	194.812	-0.37842		194.75	-0.3479		194.75	-0.45166		194.75	-0.3479
	194.906	-0.40283		194.875	-0.38452		194.75	-0.43335		195	-0.36621
	195	-0.38452		195	-0.38452		195	-0.40283		195	-0.3418
	195.109	-0.41504		195	-0.39673		195	-0.42725		195	-0.36011
	195.203	-0.40283		195.125	-0.45776		195	-0.40894		195.25	-0.354
	195.312	-0.42114		195.25	-0.45166		195.25	-0.36621		195.25	-0.38452
	195.406	-0.42725		195.375	-0.44556		195.25	-0.39673		195.5	-0.33569
	195.5	-0.45166		195.5	-0.37842		195.5	-0.37842		195.5	-0.39673
	195.609	-0.39673		195.5	-0.38452		195.5	-0.40283		195.5	-0.39063
	195.703	-0.42725		195.625	-0.33569		195.5	-0.46997		195.75	-0.36621
	195.812	-0.43335		195.75	-0.354		195.75	-0.43945		195.75	-0.41504
	195.906	-0.40894		195.875	-0.36621		195.75	-0.45776		196	-0.40894
	196	-0.45166		196	-0.354		196	-0.46387		196	-0.40894
	196.109	-0.42725		196	-0.37842		196	-0.43335		196	-0.41504
	196.203	-0.44556		196.125	-0.36011		196	-0.43945		196.25	-0.44556
	196.312	-0.44556		196.25	-0.38452		196.25	-0.49438		196.25	-0.37842
	196.406	-0.44556		196.375	-0.36011		196.25	-0.44556		196.5	-0.40894
	196.5	-0.39673		196.5	-0.37842		196.5	-0.50659		196.5	-0.37231
	196.609	-0.44556		196.5	-0.33569		196.5	-0.49438		196.5	-0.39063
	196.703	-0.45166		196.625	-0.36621		196.5	-0.45166		196.75	-0.40894
	196.812	-0.41504		196.75	-0.354		196.75	-0.50049		196.75	-0.38452
	196.906	-0.46387		196.875	-0.3418		196.75	-0.46387		197	-0.43945
	197	-0.40283		197	-0.38452		197	-0.42725		197	-0.45776
	197.109	-0.42114		197	-0.37231		197	-0.44556		197	-0.48218
	197.203	-0.44556		197.125	-0.40894		197	-0.46997		197.25	-0.46387
	197.312	-0.42114		197.25	-0.40894		197.25	-0.43335		197.25	-0.48828
	197.406	-0.37842		197.375	-0.42725		197.25	-0.45776		197.5	-0.42725
	197.5	-0.39063		197.5	-0.39063		197.5	-0.44556		197.5	-0.45776
	197.609	-0.354		197.5	-0.41504		197.5	-0.42114		197.5	-0.46997
	197.703	-0.39063		197.625	-0.354		197.5	-0.46997		197.75	-0.45166
	197.812	-0.43335		197.75	-0.354		197.75	-0.38452		197.75	-0.48218
	197.906	-0.36621		197.875	-0.38452		197.75	-0.40894		198	-0.48218
	198	-0.40283		198	-0.3479		198	-0.39673		198	-0.5127
	198.109	-0.39063		198	-0.36011		198	-0.39063		198	-0.47607
	198.203	-0.3479		198.125	-0.3418		198	-0.37231		198.25	-0.48218
	198.312	-0.3418		198.25	-0.33569		198.25	-0.40283		198.25	-0.45776
	198.406	-0.3479		198.375	-0.3479		198.25	-0.37842		198.5	-0.47607
	198.5	-0.32959		198.5	-0.36621		198.5	-0.39673		198.5	-0.45166
	198.609	-0.354		198.5	-0.29907		198.5	-0.42114		198.5	-0.42114
	198.703	-0.37231		198.625	-0.36621		198.5	-0.36621		198.75	-0.46387
	198.812	-0.30518		198.75	-0.37231		198.75	-0.39673		198.75	-0.45776
	198.906	-0.32959		198.875	-0.3479		198.75	-0.38452		199	-0.46387
	199	-0.32349		199	-0.37842		199	-0.39063		199	-0.42114
	199.109	-0.3479		199	-0.38452		199	-0.39673		199	-0.44556
	199.203	-0.354		199.125	-0.36621		199	-0.40283		199.25	-0.41504
	199.312	-0.3479		199.25	-0.39063		199.25	-0.37231		199.25	-0.39673
	199.406	-0.3418		199.375	-0.37231		199.25	-0.37842		199.5	-0.39673
	199.5	-0.3479		199.5	-0.33569		199.5	-0.40283		199.5	-0.39673
	199.609	-0.36011		199.5	-0.37231		199.5	-0.37842		199.5	-0.39673
	199.703	-0.32959		199.625	-0.36011		199.5	-0.42725		199.75	-0.39063
[truncated: 48,003 more rows]

## Sheet:  D iii
ACSF	low[K+]	ZD7288+low[K+]	ACSF
1.23	1.12	0.02	0.02
2.46	3.21	0.33	0
1.92	1.36	0	1.53
1.31	2.54	0.08	0.69
0.53	0.49	0.01	0.4
0.79	0.75	0.09	0
0.7	0.96	0.51	0
