# Supplementary material for: The cation channel mechanisms of subthreshold inward depolarizing currents in the mice VTA dopaminergic neurons and their roles in the chronic-stress-induced depression-like behavior
Source: eLife. 2024 Dec 6;12:RP88319. doi: 10.7554/eLife.88319 (PMC11623934; doi:10.7554/eLife.88319)
Supplement: Figure 2—figure supplement 4—source data 5. [file elife-88319-fig2-figsupp4-data5.xlsx]

## Sheet: E i
Time (min)	Firing rate (Hz)
0.31	3.60215
0.62	3.44086
0.93	3.44086
1.24	3.27957
1.55	3.22581
1.86	3.27957
2.17	3.27957
2.48	3.06452
2.79	2.95699
3.1	3.06452
3.41	3.01075
3.72	3.06452
4.03	3.06452
4.34	3.06452
4.65	2.95699
4.96	3.06452
5.27	3.01075
5.58	2.90323
5.89	2.95699
6.2	2.90323
6.51	2.84946
6.82	2.90323
7.13	3.01075
7.44	3.01075
7.75	2.95699
8.06	2.68817
8.37	2.68817
8.68	2.68817
8.99	2.74194
9.3	2.52688
9.61	2.47312
9.92	2.25806
10.23	2.25806
10.54	2.09677
10.85	2.2043
11.16	2.04301
11.47	2.04301
11.78	2.04301
12.09	2.15054
12.4	1.98925
12.71	1.98925
13.02	1.82796
13.33	1.88172
13.64	1.88172
13.95	1.82796
14.26	1.82796
14.57	1.82796
14.88	1.93548
15.19	2.47312
15.5	2.04301
15.81	1.77419
16.12	1.6129
16.43	1.77419
16.74	1.77419
17.05	1.72043
17.36	1.72043
17.67	1.66667
17.98	1.72043
18.29	1.72043
18.6	1.55914
18.91	1.66667
19.22	1.66667
19.53	1.82796
19.84	1.77419
20.15	1.77419
20.46	2.04301
20.77	1.93548
21.08	1.88172
21.39	1.88172
21.7	2.04301
22.01	1.88172
22.32	1.98925
22.63	2.25806
22.94	1.98925
23.25	2.15054
23.56	2.58065
23.87	2.04301
24.18	2.52688
24.49	2.31183
24.8	2.63441
25.11	2.68817
25.42	2.84946
25.73	2.15054
26.04	1.77419
26.35	2.58065
26.66	2.31183
26.97	2.68817
27.28	2.04301
27.59	1.93548
27.9	2.04301
28.21	2.09677
28.52	2.04301
28.83	2.58065
29.14	2.09677
29.45	2.04301
29.76	2.15054
30.07	2.36559
30.38	2.04301
30.69	2.52688
31	2.58065

## Sheet: E ii
acsf			zd7288
Time (ms)	voltage (mv)		Time (ms)	voltage (mv)
0	-0.7019		0	-0.64087
0.09375	-0.7019		0.125	-0.76294
0.1875	-0.79346		0.25	-0.7019
0.28125	-0.67139		0.25	-0.67139
0.40625	-0.7019		0.375	-0.67139
0.5	-0.64087		0.5	-0.64087
0.59375	-0.67139		0.625	-0.57983
0.6875	-0.7019		0.75	-0.67139
0.78125	-0.64087		0.75	-0.73242
0.90625	-0.79346		0.875	-0.57983
1	-0.64087		1	-0.73242
1.09375	-0.67139		1.125	-0.67139
1.1875	-0.73242		1.25	-0.64087
1.28125	-0.76294		1.25	-0.67139
1.40625	-0.61035		1.375	-0.73242
1.5	-0.73242		1.5	-0.64087
1.59375	-0.73242		1.625	-0.7019
1.6875	-0.54932		1.75	-0.76294
1.78125	-0.7019		1.75	-0.61035
1.90625	-0.73242		1.875	-0.76294
2	-0.73242		2	-0.64087
2.09375	-0.73242		2.125	-0.64087
2.1875	-0.82397		2.25	-0.61035
2.28125	-0.7019		2.25	-0.67139
2.40625	-0.7019		2.375	-0.64087
2.5	-0.73242		2.5	-0.64087
2.59375	-0.79346		2.625	-0.73242
2.6875	-0.76294		2.75	-0.7019
2.78125	-0.61035		2.75	-0.76294
2.90625	-0.76294		2.875	-0.64087
3	-0.64087		3	-0.7019
3.09375	-0.64087		3.125	-0.61035
3.1875	-0.67139		3.25	-0.64087
3.28125	-0.76294		3.25	-0.7019
3.40625	-0.67139		3.375	-0.67139
3.5	-0.7019		3.5	-0.7019
3.59375	-0.76294		3.625	-0.7019
3.6875	-0.57983		3.75	-0.73242
3.78125	-0.76294		3.75	-0.67139
3.90625	-0.7019		3.875	-0.76294
4	-0.64087		4	-0.61035
4.09375	-0.64087		4.125	-0.73242
4.1875	-0.73242		4.25	-0.67139
4.28125	-0.61035		4.25	-0.61035
4.40625	-0.67139		4.375	-0.73242
4.5	-0.76294		4.5	-0.73242
4.59375	-0.67139		4.625	-0.73242
4.6875	-0.67139		4.75	-0.7019
4.78125	-0.57983		4.75	-0.79346
4.90625	-0.7019		4.875	-0.61035
5	-0.57983		5	-0.76294
5.09375	-0.67139		5.125	-0.73242
5.1875	-0.7019		5.25	-0.64087
5.28125	-0.61035		5.25	-0.73242
5.40625	-0.64087		5.375	-0.73242
5.5	-0.7019		5.5	-0.73242
5.59375	-0.7019		5.625	-0.61035
5.6875	-0.54932		5.75	-0.7019
5.78125	-0.76294		5.75	-0.64087
5.90625	-0.67139		5.875	-0.7019
6	-0.61035		6	-0.67139
6.09375	-0.64087		6.125	-0.67139
6.1875	-0.61035		6.25	-0.61035
6.28125	-0.64087		6.25	-0.64087
6.40625	-0.7019		6.375	-0.7019
6.5	-0.7019		6.5	-0.67139
6.59375	-0.61035		6.625	-0.64087
6.6875	-0.64087		6.75	-0.64087
6.78125	-0.57983		6.75	-0.67139
6.90625	-0.67139		6.875	-0.61035
7	-0.57983		7	-0.7019
7.09375	-0.61035		7.125	-0.64087
7.1875	-0.67139		7.25	-0.54932
7.28125	-0.64087		7.25	-0.73242
7.40625	-0.67139		7.375	-0.67139
7.5	-0.7019		7.5	-0.7019
7.59375	-0.73242		7.625	-0.73242
7.6875	-0.61035		7.75	-0.57983
7.78125	-0.79346		7.75	-0.67139
7.90625	-0.7019		7.875	-0.7019
8	-0.67139		8	-0.5188
8.09375	-0.73242		8.125	-0.57983
8.1875	-0.73242		8.25	-0.67139
8.28125	-0.76294		8.25	-0.54932
8.40625	-0.73242		8.375	-0.67139
8.5	-0.76294		8.5	-0.67139
8.59375	-0.67139		8.625	-0.64087
8.6875	-0.73242		8.75	-0.64087
8.78125	-0.76294		8.75	-0.73242
8.90625	-0.76294		8.875	-0.61035
9	-0.76294		9	-0.57983
9.09375	-0.7019		9.125	-0.67139
9.1875	-0.82397		9.25	-0.57983
9.28125	-0.76294		9.25	-0.67139
9.40625	-0.7019		9.375	-0.54932
9.5	-0.82397		9.5	-0.67139
9.59375	-0.73242		9.625	-0.57983
9.6875	-0.76294		9.75	-0.64087
9.78125	-0.79346		9.75	-0.67139
9.90625	-0.7019		9.875	-0.61035
10	-0.67139		10	-0.67139
10.0938	-0.79346		10.125	-0.7019
10.1875	-0.7019		10.25	-0.73242
10.2812	-0.73242		10.25	-0.61035
10.4062	-0.67139		10.375	-0.79346
10.5	-0.73242		10.5	-0.7019
10.5938	-0.7019		10.625	-0.67139
10.6875	-0.76294		10.75	-0.7019
10.7812	-0.7019		10.75	-0.67139
10.9062	-0.67139		10.875	-0.61035
11	-0.64087		11	-0.73242
11.0938	-0.61035		11.125	-0.73242
11.1875	-0.79346		11.25	-0.61035
11.2812	-0.7019		11.25	-0.76294
11.4062	-0.73242		11.375	-0.61035
11.5	-0.7019		11.5	-0.73242
11.5938	-0.67139		11.625	-0.67139
11.6875	-0.57983		11.75	-0.64087
11.7812	-0.67139		11.75	-0.67139
11.9062	-0.67139		11.875	-0.7019
12	-0.67139		12	-0.7019
12.0938	-0.73242		12.125	-0.64087
12.1875	-0.57983		12.25	-0.73242
12.2812	-0.73242		12.25	-0.64087
12.4062	-0.7019		12.375	-0.7019
12.5	-0.73242		12.5	-0.7019
12.5938	-0.67139		12.625	-0.7019
12.6875	-0.76294		12.75	-0.67139
12.7812	-0.67139		12.75	-0.7019
12.9062	-0.64087		12.875	-0.7019
13	-0.76294		13	-0.67139
13.0938	-0.61035		13.125	-0.7019
13.1875	-0.73242		13.25	-0.82397
13.2812	-0.64087		13.25	-0.7019
13.4062	-0.7019		13.375	-0.64087
13.5	-0.7019		13.5	-0.73242
13.5938	-0.67139		13.625	-0.67139
13.6875	-0.67139		13.75	-0.57983
13.7812	-0.73242		13.75	-0.76294
13.9062	-0.7019		13.875	-0.64087
14	-0.67139		14	-0.64087
14.0938	-0.76294		14.125	-0.76294
14.1875	-0.57983		14.25	-0.76294
14.2812	-0.73242		14.25	-0.67139
14.4062	-0.7019		14.375	-0.76294
14.5	-0.61035		14.5	-0.64087
14.5938	-0.64087		14.625	-0.67139
14.6875	-0.79346		14.75	-0.76294
14.7812	-0.7019		14.75	-0.7019
14.9062	-0.76294		14.875	-0.67139
15	-0.79346		15	-0.7019
15.0938	-0.79346		15.125	-0.76294
15.1875	-0.82397		15.25	-0.67139
15.2812	-0.79346		15.25	-0.7019
15.4062	-0.76294		15.375	-0.61035
15.5	-0.79346		15.5	-0.73242
15.5938	-0.76294		15.625	-0.67139
15.6875	-0.82397		15.75	-0.64087
15.7812	-0.76294		15.75	-0.67139
15.9062	-0.76294		15.875	-0.64087
16	-0.76294		16	-0.73242
16.0938	-0.76294		16.125	-0.7019
16.1875	-0.61035		16.25	-0.7019
16.2812	-0.76294		16.25	-0.67139
16.4062	-0.73242		16.375	-0.73242
16.5	-0.67139		16.5	-0.7019
16.5938	-0.64087		16.625	-0.7019
16.6875	-0.73242		16.75	-0.76294
16.7812	-0.67139		16.75	-0.64087
16.9062	-0.67139		16.875	-0.82397
17	-0.82397		17	-0.73242
17.0938	-0.73242		17.125	-0.73242
17.1875	-0.7019		17.25	-0.76294
17.2812	-0.64087		17.25	-0.79346
17.4062	-0.7019		17.375	-0.64087
17.5	-0.64087		17.5	-0.79346
17.5938	-0.61035		17.625	-0.76294
17.6875	-0.73242		17.75	-0.61035
17.7812	-0.7019		17.75	-0.76294
17.9062	-0.67139		17.875	-0.73242
18	-0.7019		18	-0.7019
18.0938	-0.7019		18.125	-0.67139
18.1875	-0.54932		18.25	-0.7019
18.2812	-0.7019		18.25	-0.67139
18.4062	-0.67139		18.375	-0.76294
18.5	-0.57983		18.5	-0.76294
18.5938	-0.67139		18.625	-0.67139
18.6875	-0.7019		18.75	-0.76294
18.7812	-0.67139		18.75	-0.7019
18.9062	-0.61035		18.875	-0.79346
19	-0.7019		19	-0.67139
19.0938	-0.61035		19.125	-0.7019
19.1875	-0.64087		19.25	-0.61035
19.2812	-0.64087		19.25	-0.64087
19.4062	-0.64087		19.375	-0.7019
19.5	-0.67139		19.5	-0.7019
19.5938	-0.57983		19.625	-0.73242
19.6875	-0.79346		19.75	-0.67139
19.7812	-0.64087		19.75	-0.79346
19.9062	-0.67139		19.875	-0.67139
20	-0.7019		20	-0.73242
20.0938	-0.73242		20.125	-0.73242
20.1875	-0.54932		20.25	-0.7019
20.2812	-0.73242		20.25	-0.7019
20.4062	-0.7019		20.375	-0.64087
20.5	-0.57983		20.5	-0.64087
20.5938	-0.76294		20.625	-0.64087
20.6875	-0.67139		20.75	-0.79346
20.7812	-0.67139		20.75	-0.61035
20.9062	-0.61035		20.875	-0.64087
21	-0.73242		21	-0.64087
21.0938	-0.64087		21.125	-0.57983
21.1875	-0.73242		21.25	-0.67139
21.2812	-0.73242		21.25	-0.76294
21.4062	-0.76294		21.375	-0.67139
21.5	-0.73242		21.5	-0.67139
21.5938	-0.64087		21.625	-0.73242
21.6875	-0.76294		21.75	-0.57983
21.7812	-0.64087		21.75	-0.67139
21.9062	-0.64087		21.875	-0.61035
22	-0.7019		22	-0.64087
22.0938	-0.7019		22.125	-0.57983
22.1875	-0.5188		22.25	-0.57983
22.2812	-0.7019		22.25	-0.67139
22.4062	-0.73242		22.375	-0.57983
22.5	-0.64087		22.5	-0.76294
22.5938	-0.85449		22.625	-0.67139
22.6875	-0.76294		22.75	-0.7019
22.7812	-0.7019		22.75	-0.64087
22.9062	-0.7019		22.875	-0.7019
23	-0.73242		23	-0.64087
23.0938	-0.61035		23.125	-0.64087
23.1875	-0.67139		23.25	-0.73242
23.2812	-0.7019		23.25	-0.64087
23.4062	-0.7019		23.375	-0.76294
23.5	-0.7019		23.5	-0.7019
23.5938	-0.64087		23.625	-0.73242
23.6875	-0.79346		23.75	-0.67139
23.7812	-0.64087		23.75	-0.76294
23.9062	-0.67139		23.875	-0.64087
24	-0.67139		24	-0.67139
24.0938	-0.7019		24.125	-0.82397
24.1875	-0.7019		24.25	-0.73242
24.2812	-0.7019		24.25	-0.82397
24.4062	-0.73242		24.375	-0.79346
24.5	-0.57983		24.5	-0.73242
24.5938	-0.79346		24.625	-0.67139
24.6875	-0.67139		24.75	-0.79346
24.7812	-0.7019		24.75	-0.67139
24.9062	-0.67139		24.875	-0.7019
25	-0.67139		25	-0.76294
25.0938	-0.64087		25.125	-0.73242
25.1875	-0.67139		25.25	-0.79346
25.2812	-0.7019		25.25	-0.73242
25.4062	-0.64087		25.375	-0.73242
25.5	-0.7019		25.5	-0.67139
25.5938	-0.7019		25.625	-0.76294
25.6875	-0.67139		25.75	-0.73242
25.7812	-0.67139		25.75	-0.7019
25.9062	-0.67139		25.875	-0.7019
26	-0.7019		26	-0.7019
26.0938	-0.67139		26.125	-0.73242
26.1875	-0.64087		26.25	-0.57983
26.2812	-0.73242		26.25	-0.73242
26.4062	-0.7019		26.375	-0.61035
26.5	-0.67139		26.5	-0.67139
26.5938	-0.73242		26.625	-0.7019
26.6875	-0.61035		26.75	-0.67139
26.7812	-0.61035		26.75	-0.61035
26.9062	-0.7019		26.875	-0.7019
27	-0.64087		27	-0.7019
27.0938	-0.67139		27.125	-0.57983
27.1875	-0.67139		27.25	-0.73242
27.2812	-0.79346		27.25	-0.61035
27.4062	-0.7019		27.375	-0.67139
27.5	-0.67139		27.5	-0.7019
27.5938	-0.67139		27.625	-0.64087
27.6875	-0.67139		27.75	-0.57983
27.7812	-0.7019		27.75	-0.67139
27.9062	-0.7019		27.875	-0.67139
28	-0.79346		28	-0.64087
28.0938	-0.67139		28.125	-0.7019
28.1875	-0.76294		28.25	-0.61035
28.2812	-0.76294		28.25	-0.67139
28.4062	-0.82397		28.375	-0.64087
28.5	-0.73242		28.5	-0.67139
28.5938	-0.79346		28.625	-0.61035
28.6875	-0.7019		28.75	-0.67139
28.7812	-0.64087		28.75	-0.7019
28.9062	-0.76294		28.875	-0.61035
29	-0.61035		29	-0.7019
29.0938	-0.79346		29.125	-0.67139
29.1875	-0.73242		29.25	-0.73242
29.2812	-0.76294		29.25	-0.67139
29.4062	-0.7019		29.375	-0.73242
29.5	-0.7019		29.5	-0.67139
29.5938	-0.67139		29.625	-0.64087
29.6875	-0.73242		29.75	-0.73242
29.7812	-0.82397		29.75	-0.64087
29.9062	-0.67139		29.875	-0.67139
30	-0.73242		30	-0.7019
30.0938	-0.67139		30.125	-0.7019
30.1875	-0.76294		30.25	-0.57983
30.2812	-0.76294		30.25	-0.7019
30.4062	-0.7019		30.375	-0.67139
30.5	-0.64087		30.5	-0.64087
30.5938	-0.76294		30.625	-0.7019
30.6875	-0.67139		30.75	-0.7019
30.7812	-0.64087		30.75	-0.57983
30.9062	-0.82397		30.875	-0.67139
31	-0.64087		31	-0.76294
31.0938	-0.73242		31.125	-0.7019
31.1875	-0.79346		31.25	-0.76294
31.2812	-0.7019		31.25	-0.67139
31.4062	-0.67139		31.375	-0.73242
31.5	-0.76294		31.5	-0.76294
31.5938	-0.7019		31.625	-0.76294
31.6875	-0.7019		31.75	-0.73242
31.7812	-0.7019		31.75	-0.7019
31.9062	-0.76294		31.875	-0.67139
32	-0.82397		32	-0.64087
32.0938	-0.79346		32.125	-0.64087
32.1875	-0.7019		32.25	-0.61035
32.2812	-0.7019		32.25	-0.73242
32.4062	-0.67139		32.375	-0.64087
32.5	-0.7019		32.5	-0.67139
32.5938	-0.79346		32.625	-0.7019
32.6875	-0.7019		32.75	-0.67139
32.7812	-0.67139		32.75	-0.73242
32.9062	-0.82397		32.875	-0.67139
33	-0.64087		33	-0.67139
33.0938	-0.79346		33.125	-0.61035
33.1875	-0.73242		33.25	-0.7019
33.2812	-0.64087		33.25	-0.57983
33.4062	-0.64087		33.375	-0.67139
33.5	-0.73242		33.5	-0.67139
33.5938	-0.64087		33.625	-0.57983
33.6875	-0.67139		33.75	-0.73242
33.7812	-0.79346		33.75	-0.7019
33.9062	-0.64087		33.875	-0.7019
34	-0.76294		34	-0.67139
34.0938	-0.76294		34.125	-0.76294
34.1875	-0.73242		34.25	-0.64087
34.2812	-0.67139		34.25	-0.67139
34.4062	-0.67139		34.375	-0.7019
34.5	-0.67139		34.5	-0.54932
34.5938	-0.64087		34.625	-0.67139
34.6875	-0.73242		34.75	-0.61035
34.7812	-0.67139		34.75	-0.7019
34.9062	-0.73242		34.875	-0.64087
35	-0.61035		35	-0.7019
35.0938	-0.76294		35.125	-0.64087
35.1875	-0.76294		35.25	-0.67139
35.2812	-0.61035		35.25	-0.67139
35.4062	-0.7019		35.375	-0.64087
35.5	-0.73242		35.5	-0.7019
35.5938	-0.7019		35.625	-0.64087
35.6875	-0.67139		35.75	-0.76294
35.7812	-0.79346		35.75	-0.64087
35.9062	-0.61035		35.875	-0.7019
36	-0.7019		36	-0.67139
36.0938	-0.7019		36.125	-0.7019
36.1875	-0.7019		36.25	-0.67139
36.2812	-0.64087		36.25	-0.67139
36.4062	-0.67139		36.375	-0.7019
36.5	-0.76294		36.5	-0.7019
36.5938	-0.67139		36.625	-0.82397
36.6875	-0.7019		36.75	-0.64087
36.7812	-0.7019		36.75	-0.76294
36.9062	-0.76294		36.875	-0.64087
37	-0.57983		37	-0.61035
37.0938	-0.67139		37.125	-0.61035
37.1875	-0.67139		37.25	-0.67139
37.2812	-0.61035		37.25	-0.7019
37.4062	-0.76294		37.375	-0.7019
37.5	-0.73242		37.5	-0.82397
37.5938	-0.67139		37.625	-0.61035
37.6875	-0.67139		37.75	-0.73242
37.7812	-0.79346		37.75	-0.76294
37.9062	-0.57983		37.875	-0.7019
38	-0.67139		38	-0.7019
38.0938	-0.67139		38.125	-0.73242
38.1875	-0.64087		38.25	-0.7019
38.2812	-0.64087		38.25	-0.67139
38.4062	-0.54932		38.375	-0.73242
38.5	-0.67139		38.5	-0.7019
38.5938	-0.57983		38.625	-0.73242
38.6875	-0.67139		38.75	-0.64087
38.7812	-0.64087		38.75	-0.73242
38.9062	-0.67139		38.875	-0.64087
39	-0.48828		39	-0.7019
39.0938	-0.64087		39.125	-0.7019
39.1875	-0.7019		39.25	-0.61035
39.2812	-0.57983		39.25	-0.67139
39.4062	-0.73242		39.375	-0.67139
39.5	-0.61035		39.5	-0.73242
39.5938	-0.64087		39.625	-0.61035
39.6875	-0.64087		39.75	-0.73242
39.7812	-0.73242		39.75	-0.64087
39.9062	-0.57983		39.875	-0.64087
40	-0.61035		40	-0.7019
40.0938	-0.64087		40.125	-0.67139
40.1875	-0.67139		40.25	-0.73242
40.2812	-0.73242		40.25	-0.73242
40.4062	-0.64087		40.375	-0.67139
40.5	-0.76294		40.5	-0.57983
40.5938	-0.67139		40.625	-0.7019
40.6875	-0.7019		40.75	-0.64087
40.7812	-0.73242		40.75	-0.67139
40.9062	-0.67139		40.875	-0.73242
41	-0.64087		41	-0.67139
41.0938	-0.7019		41.125	-0.64087
41.1875	-0.76294		41.25	-0.73242
41.2812	-0.54932		41.25	-0.73242
41.4062	-0.76294		41.375	-0.64087
41.5	-0.7019		41.5	-0.79346
41.5938	-0.67139		41.625	-0.61035
41.6875	-0.76294		41.75	-0.61035
41.7812	-0.73242		41.75	-0.64087
41.9062	-0.57983		41.875	-0.57983
42	-0.67139		42	-0.64087
42.0938	-0.76294		42.125	-0.61035
42.1875	-0.73242		42.25	-0.73242
42.2812	-0.76294		42.25	-0.64087
42.4062	-0.76294		42.375	-0.67139
42.5	-0.7019		42.5	-0.67139
42.5938	-0.7019		42.625	-0.64087
42.6875	-0.7019		42.75	-0.64087
42.7812	-0.79346		42.75	-0.7019
42.9062	-0.73242		42.875	-0.67139
43	-0.76294		43	-0.57983
43.0938	-0.82397		43.125	-0.76294
43.1875	-0.79346		43.25	-0.64087
43.2812	-0.67139		43.25	-0.64087
43.4062	-0.82397		43.375	-0.7019
43.5	-0.73242		43.5	-0.73242
43.5938	-0.7019		43.625	-0.67139
43.6875	-0.67139		43.75	-0.76294
43.7812	-0.7019		43.75	-0.67139
43.9062	-0.64087		43.875	-0.61035
44	-0.7019		44	-0.73242
44.0938	-0.79346		44.125	-0.61035
44.1875	-0.67139		44.25	-0.67139
44.2812	-0.82397		44.25	-0.7019
44.4062	-0.73242		44.375	-0.73242
44.5	-0.76294		44.5	-0.67139
44.5938	-0.7019		44.625	-0.67139
44.6875	-0.7019		44.75	-0.64087
44.7812	-0.73242		44.75	-0.67139
44.9062	-0.61035		44.875	-0.76294
45	-0.73242		45	-0.67139
45.0938	-0.7019		45.125	-0.79346
45.1875	-0.76294		45.25	-0.73242
45.2812	-0.64087		45.25	-0.73242
45.4062	-0.76294		45.375	-0.67139
45.5	-0.67139		45.5	-0.7019
45.5938	-0.61035		45.625	-0.73242
45.6875	-0.7019		45.75	-0.67139
45.7812	-0.57983		45.75	-0.67139
45.9062	-0.67139		45.875	-0.64087
46	-0.67139		46	-0.76294
46.0938	-0.7019		46.125	-0.64087
46.1875	-0.54932		46.25	-0.79346
46.2812	-0.67139		46.25	-0.7019
46.4062	-0.61035		46.375	-0.67139
46.5	-0.67139		46.5	-0.7019
46.5938	-0.61035		46.625	-0.7019
46.6875	-0.57983		46.75	-0.64087
46.7812	-0.67139		46.75	-0.64087
46.9062	-0.64087		46.875	-0.76294
47	-0.76294		47	-0.54932
47.0938	-0.64087		47.125	-0.73242
47.1875	-0.7019		47.25	-0.67139
47.2812	-0.67139		47.25	-0.57983
47.4062	-0.76294		47.375	-0.67139
47.5	-0.67139		47.5	-0.67139
47.5938	-0.64087		47.625	-0.61035
47.6875	-0.79346		47.75	-0.64087
47.7812	-0.67139		47.75	-0.61035
47.9062	-0.76294		47.875	-0.64087
48	-0.79346		48	-0.73242
48.0938	-0.76294		48.125	-0.73242
48.1875	-0.76294		48.25	-0.64087
48.2812	-0.79346		48.25	-0.67139
48.4062	-0.67139		48.375	-0.7019
48.5	-0.73242		48.5	-0.64087
48.5938	-0.76294		48.625	-0.7019
48.6875	-0.79346		48.75	-0.67139
48.7812	-0.85449		48.75	-0.67139
48.9062	-0.76294		48.875	-0.67139
49	-0.73242		49	-0.61035
49.0938	-0.7019		49.125	-0.73242
49.1875	-0.7019		49.25	-0.61035
49.2812	-0.7019		49.25	-0.64087
49.4062	-0.79346		49.375	-0.67139
49.5	-0.67139		49.5	-0.61035
49.5938	-0.67139		49.625	-0.7019
49.6875	-0.82397		49.75	-0.7019
49.7812	-0.64087		49.75	-0.7019
49.9062	-0.79346		49.875	-0.7019
50	-0.7019		50	-0.79346
50.0938	-0.67139		50.125	-0.61035
50.1875	-0.64087		50.25	-0.76294
50.2812	-0.76294		50.25	-0.73242
50.4062	-0.7019		50.375	-0.61035
50.5	-0.64087		50.5	-0.73242
50.5938	-0.73242		50.625	-0.67139
50.6875	-0.64087		50.75	-0.61035
50.7812	-0.73242		50.75	-0.54932
50.9062	-0.73242		50.875	-0.73242
51	-0.73242		51	-0.61035
51.0938	-0.64087		51.125	-0.7019
51.1875	-0.67139		51.25	-0.73242
51.2812	-0.64087		51.25	-0.67139
51.4062	-0.64087		51.375	-0.7019
51.5	-0.67139		51.5	-0.7019
51.5938	-0.64087		51.625	-0.79346
51.6875	-0.79346		51.75	-0.67139
51.7812	-0.61035		51.75	-0.73242
51.9062	-0.79346		51.875	-0.64087
52	-0.67139		52	-0.7019
52.0938	-0.64087		52.125	-0.57983
52.1875	-0.73242		52.25	-0.76294
52.2812	-0.73242		52.25	-0.7019
52.4062	-0.7019		52.375	-0.67139
52.5	-0.64087		52.5	-0.85449
52.5938	-0.79346		52.625	-0.7019
52.6875	-0.61035		52.75	-0.79346
52.7812	-0.7019		52.75	-0.67139
52.9062	-0.67139		52.875	-0.7019
53	-0.7019		53	-0.64087
53.0938	-0.67139		53.125	-0.73242
53.1875	-0.67139		53.25	-0.67139
53.2812	-0.73242		53.25	-0.67139
53.4062	-0.7019		53.375	-0.82397
53.5	-0.73242		53.5	-0.64087
53.5938	-0.7019		53.625	-0.76294
53.6875	-0.76294		53.75	-0.67139
53.7812	-0.61035		53.75	-0.67139
53.9062	-0.76294		53.875	-0.64087
54	-0.67139		54	-0.73242
54.0938	-0.54932		54.125	-0.61035
54.1875	-0.7019		54.25	-0.7019
54.2812	-0.7019		54.25	-0.79346
54.4062	-0.7019		54.375	-0.64087
54.5	-0.67139		54.5	-0.7019
54.5938	-0.82397		54.625	-0.64087
54.6875	-0.67139		54.75	-0.67139
54.7812	-0.76294		54.75	-0.64087
54.9062	-0.7019		54.875	-0.64087
55	-0.67139		55	-0.57983
55.0938	-0.73242		55.125	-0.57983
55.1875	-0.7019		55.25	-0.67139
55.2812	-0.76294		55.25	-0.67139
55.4062	-0.67139		55.375	-0.67139
55.5	-0.76294		55.5	-0.61035
55.5938	-0.79346		55.625	-0.73242
55.6875	-0.85449		55.75	-0.64087
55.7812	-0.67139		55.75	-0.64087
55.9062	-0.79346		55.875	-0.7019
56	-0.76294		56	-0.64087
56.0938	-0.64087		56.125	-0.7019
56.1875	-0.76294		56.25	-0.7019
56.2812	-0.73242		56.25	-0.67139
56.4062	-0.7019		56.375	-0.64087
56.5	-0.73242		56.5	-0.79346
56.5938	-0.85449		56.625	-0.64087
56.6875	-0.67139		56.75	-0.73242
56.7812	-0.73242		56.75	-0.73242
56.9062	-0.73242		56.875	-0.67139
57	-0.7019		57	-0.73242
57.0938	-0.7019		57.125	-0.7019
57.1875	-0.64087		57.25	-0.76294
57.2812	-0.76294		57.25	-0.67139
57.4062	-0.64087		57.375	-0.79346
57.5	-0.7019		57.5	-0.73242
57.5938	-0.64087		57.625	-0.76294
57.6875	-0.67139		57.75	-0.73242
57.7812	-0.57983		57.75	-0.7019
57.9062	-0.73242		57.875	-0.76294
58	-0.67139		58	-0.7019
58.0938	-0.54932		58.125	-0.73242
58.1875	-0.76294		58.25	-0.64087
58.2812	-0.7019		58.25	-0.7019
58.4062	-0.64087		58.375	-0.67139
58.5	-0.64087		58.5	-0.67139
58.5938	-0.73242		58.625	-0.7019
58.6875	-0.57983		58.75	-0.73242
58.7812	-0.67139		58.75	-0.7019
58.9062	-0.73242		58.875	-0.64087
59	-0.64087		59	-0.82397
59.0938	-0.67139		59.125	-0.61035
59.1875	-0.7019		59.25	-0.67139
59.2812	-0.67139		59.25	-0.76294
59.4062	-0.67139		59.375	-0.79346
59.5	-0.64087		59.5	-0.67139
59.5938	-0.7019		59.625	-0.76294
59.6875	-0.64087		59.75	-0.7019
59.7812	-0.54932		59.75	-0.61035
59.9062	-0.67139		59.875	-0.76294
60	-0.64087		60	-0.73242
60.0938	-0.5188		60.125	-0.7019
60.1875	-0.7019		60.25	-0.67139
60.2812	-0.67139		60.25	-0.7019
60.4062	-0.61035		60.375	-0.57983
60.5	-0.57983		60.5	-0.7019
60.5938	-0.67139		60.625	-0.64087
60.6875	-0.61035		60.75	-0.61035
60.7812	-0.67139		60.75	-0.7019
60.9062	-0.76294		60.875	-0.57983
61	-0.57983		61	-0.67139
61.0938	-0.73242		61.125	-0.67139
61.1875	-0.7019		61.25	-0.73242
61.2812	-0.73242		61.25	-0.67139
61.4062	-0.67139		61.375	-0.7019
61.5	-0.73242		61.5	-0.61035
61.5938	-0.7019		61.625	-0.61035
61.6875	-0.61035		61.75	-0.67139
61.7812	-0.64087		61.75	-0.64087
61.9062	-0.73242		61.875	-0.7019
62	-0.76294		62	-0.61035
62.0938	-0.57983		62.125	-0.73242
62.1875	-0.79346		62.25	-0.67139
62.2812	-0.73242		62.25	-0.67139
62.4062	-0.7019		62.375	-0.64087
62.5	-0.73242		62.5	-0.67139
62.5938	-0.7019		62.625	-0.7019
62.6875	-0.7019		62.75	-0.67139
62.7812	-0.7019		62.75	-0.7019
62.9062	-0.79346		62.875	-0.61035
63	-0.61035		63	-0.76294
63.0938	-0.79346		63.125	-0.67139
63.1875	-0.67139		63.25	-0.61035
63.2812	-0.76294		63.25	-0.73242
63.4062	-0.7019		63.375	-0.76294
63.5	-0.67139		63.5	-0.7019
63.5938	-0.76294		63.625	-0.7019
63.6875	-0.67139		63.75	-0.73242
63.7812	-0.73242		63.75	-0.57983
63.9062	-0.73242		63.875	-0.76294
64	-0.73242		64	-0.73242
64.0938	-0.64087		64.125	-0.76294
64.1875	-0.76294		64.25	-0.79346
64.2812	-0.67139		64.25	-0.76294
64.4062	-0.64087		64.375	-0.7019
64.5	-0.73242		64.5	-0.7019
64.5938	-0.67139		64.625	-0.67139
64.6875	-0.67139		64.75	-0.76294
64.7812	-0.76294		64.75	-0.79346
64.9062	-0.73242		64.875	-0.79346
65	-0.67139		65	-0.79346
65.0938	-0.73242		65.125	-0.76294
65.1875	-0.64087		65.25	-0.73242
65.2812	-0.7019		65.25	-0.67139
65.4062	-0.7019		65.375	-0.7019
65.5	-0.73242		65.5	-0.73242
65.5938	-0.76294		65.625	-0.67139
65.6875	-0.73242		65.75	-0.73242
65.7812	-0.67139		65.75	-0.67139
65.9062	-0.7019		65.875	-0.76294
66	-0.67139		66	-0.57983
66.0938	-0.64087		66.125	-0.73242
66.1875	-0.67139		66.25	-0.67139
66.2812	-0.54932		66.25	-0.61035
66.4062	-0.57983		66.375	-0.67139
66.5	-0.7019		66.5	-0.64087
66.5938	-0.57983		66.625	-0.64087
66.6875	-0.64087		66.75	-0.61035
66.7812	-0.67139		66.75	-0.73242
66.9062	-0.67139		66.875	-0.54932
67	-0.64087		67	-0.64087
67.0938	-0.73242		67.125	-0.61035
67.1875	-0.61035		67.25	-0.57983
67.2812	-0.64087		67.25	-0.64087
67.4062	-0.73242		67.375	-0.61035
67.5	-0.7019		67.5	-0.61035
67.5938	-0.76294		67.625	-0.57983
67.6875	-0.64087		67.75	-0.67139
67.7812	-0.73242		67.75	-0.54932
67.9062	-0.67139		67.875	-0.64087
68	-0.73242		68	-0.61035
68.0938	-0.7019		68.125	-0.64087
68.1875	-0.76294		68.25	-0.64087
68.2812	-0.73242		68.25	-0.57983
68.4062	-0.73242		68.375	-0.67139
68.5	-0.85449		68.5	-0.64087
68.5938	-0.64087		68.625	-0.7019
68.6875	-0.76294		68.75	-0.64087
68.7812	-0.79346		68.75	-0.57983
68.9062	-0.76294		68.875	-0.57983
69	-0.67139		69	-0.67139
69.0938	-0.82397		69.125	-0.57983
69.1875	-0.67139		69.25	-0.64087
69.2812	-0.7019		69.25	-0.67139
69.4062	-0.85449		69.375	-0.57983
69.5	-0.7019		69.5	-0.73242
69.5938	-0.73242		69.625	-0.67139
69.6875	-0.7019		69.75	-0.67139
69.7812	-0.79346		69.75	-0.7019
69.9062	-0.73242		69.875	-0.73242
70	-0.73242		70	-0.61035
70.0938	-0.73242		70.125	-0.7019
70.1875	-0.7019		70.25	-0.76294
70.2812	-0.73242		70.25	-0.64087
70.4062	-0.67139		70.375	-0.76294
70.5	-0.82397		70.5	-0.7019
70.5938	-0.64087		70.625	-0.64087
70.6875	-0.79346		70.75	-0.61035
70.7812	-0.76294		70.75	-0.73242
70.9062	-0.64087		70.875	-0.64087
71	-0.7019		71	-0.7019
71.0938	-0.79346		71.125	-0.73242
71.1875	-0.76294		71.25	-0.7019
71.2812	-0.7019		71.25	-0.79346
71.4062	-0.79346		71.375	-0.67139
71.5	-0.61035		71.5	-0.76294
71.5938	-0.73242		71.625	-0.67139
71.6875	-0.7019		71.75	-0.67139
71.7812	-0.7019		71.75	-0.64087
71.9062	-0.64087		71.875	-0.64087
72	-0.64087		72	-0.67139
72.0938	-0.7019		72.125	-0.76294
72.1875	-0.67139		72.25	-0.76294
72.2812	-0.73242		72.25	-0.67139
72.4062	-0.7019		72.375	-0.85449
72.5	-0.76294		72.5	-0.73242
72.5938	-0.64087		72.625	-0.7019
72.6875	-0.79346		72.75	-0.7019
72.7812	-0.64087		72.75	-0.67139
72.9062	-0.57983		72.875	-0.61035
73	-0.67139		73	-0.67139
73.0938	-0.67139		73.125	-0.64087
73.1875	-0.64087		73.25	-0.64087
73.2812	-0.64087		73.25	-0.73242
73.4062	-0.82397		73.375	-0.64087
73.5	-0.61035		73.5	-0.67139
73.5938	-0.73242		73.625	-0.61035
73.6875	-0.73242		73.75	-0.61035
73.7812	-0.73242		73.75	-0.64087
73.9062	-0.7019		73.875	-0.67139
74	-0.64087		74	-0.64087
74.0938	-0.73242		74.125	-0.64087
74.1875	-0.64087		74.25	-0.67139
74.2812	-0.7019		74.25	-0.64087
74.4062	-0.67139		74.375	-0.64087
74.5	-0.73242		74.5	-0.7019
74.5938	-0.64087		74.625	-0.61035
74.6875	-0.79346		74.75	-0.54932
74.7812	-0.76294		74.75	-0.61035
74.9062	-0.64087		74.875	-0.67139
75	-0.79346		75	-0.57983
75.0938	-0.79346		75.125	-0.61035
75.1875	-0.73242		75.25	-0.64087
75.2812	-0.7019		75.25	-0.67139
75.4062	-0.82397		75.375	-0.54932
75.5	-0.7019		75.5	-0.67139
75.5938	-0.79346		75.625	-0.61035
75.6875	-0.88501		75.75	-0.61035
75.7812	-0.73242		75.75	-0.76294
75.9062	-0.73242		75.875	-0.61035
76	-0.76294		76	-0.67139
76.0938	-0.79346		76.125	-0.67139
76.1875	-0.79346		76.25	-0.76294
76.2812	-0.76294		76.25	-0.64087
76.4062	-0.82397		76.375	-0.73242
76.5	-0.76294		76.5	-0.64087
76.5938	-0.7019		76.625	-0.64087
76.6875	-0.73242		76.75	-0.76294
76.7812	-0.73242		76.75	-0.67139
76.9062	-0.57983		76.875	-0.76294
77	-0.79346		77	-0.73242
77.0938	-0.7019		77.125	-0.76294
77.1875	-0.64087		77.25	-0.7019
77.2812	-0.67139		77.25	-0.79346
77.4062	-0.73242		77.375	-0.67139
77.5	-0.57983		77.5	-0.7019
77.5938	-0.67139		77.625	-0.76294
77.6875	-0.67139		77.75	-0.67139
77.7812	-0.61035		77.75	-0.76294
77.9062	-0.7019		77.875	-0.7019
78	-0.67139		78	-0.76294
78.0938	-0.73242		78.125	-0.7019
78.1875	-0.64087		78.25	-0.76294
78.2812	-0.67139		78.25	-0.7019
78.4062	-0.64087		78.375	-0.73242
78.5	-0.61035		78.5	-0.73242
78.5938	-0.61035		78.625	-0.7019
78.6875	-0.64087		78.75	-0.76294
78.7812	-0.67139		78.75	-0.7019
78.9062	-0.54932		78.875	-0.85449
79	-0.76294		79	-0.67139
79.0938	-0.61035		79.125	-0.67139
79.1875	-0.61035		79.25	-0.73242
79.2812	-0.67139		79.25	-0.73242
79.4062	-0.67139		79.375	-0.64087
79.5	-0.57983		79.5	-0.73242
79.5938	-0.61035		79.625	-0.76294
79.6875	-0.76294		79.75	-0.61035
79.7812	-0.57983		79.75	-0.76294
79.9062	-0.76294		79.875	-0.82397
80	-0.61035		80	-0.7019
80.0938	-0.67139		80.125	-0.67139
80.1875	-0.61035		80.25	-0.7019
80.2812	-0.67139		80.25	-0.61035
80.4062	-0.67139		80.375	-0.7019
80.5	-0.67139		80.5	-0.79346
80.5938	-0.7019		80.625	-0.67139
80.6875	-0.7019		80.75	-0.73242
80.7812	-0.73242		80.75	-0.73242
80.9062	-0.61035		80.875	-0.73242
81	-0.79346		81	-0.7019
81.0938	-0.7019		81.125	-0.76294
81.1875	-0.7019		81.25	-0.73242
81.2812	-0.73242		81.25	-0.73242
81.4062	-0.73242		81.375	-0.67139
81.5	-0.64087		81.5	-0.7019
81.5938	-0.73242		81.625	-0.73242
81.6875	-0.73242		81.75	-0.7019
81.7812	-0.7019		81.75	-0.7019
81.9062	-0.76294		81.875	-0.64087
82	-0.76294		82	-0.67139
82.0938	-0.73242		82.125	-0.64087
82.1875	-0.73242		82.25	-0.67139
82.2812	-0.73242		82.25	-0.67139
82.4062	-0.76294		82.375	-0.67139
82.5	-0.7019		82.5	-0.7019
82.5938	-0.67139		82.625	-0.64087
82.6875	-0.76294		82.75	-0.73242
82.7812	-0.7019		82.75	-0.64087
82.9062	-0.61035		82.875	-0.73242
83	-0.76294		83	-0.67139
83.0938	-0.64087		83.125	-0.61035
83.1875	-0.57983		83.25	-0.73242
83.2812	-0.67139		83.25	-0.73242
83.4062	-0.61035		83.375	-0.7019
83.5	-0.64087		83.5	-0.67139
83.5938	-0.73242		83.625	-0.82397
83.6875	-0.7019		83.75	-0.64087
83.7812	-0.7019		83.75	-0.7019
83.9062	-0.76294		83.875	-0.7019
84	-0.67139		84	-0.73242
84.0938	-0.67139		84.125	-0.76294
84.1875	-0.7019		84.25	-0.7019
84.2812	-0.67139		84.25	-0.76294
84.4062	-0.67139		84.375	-0.7019
84.5	-0.64087		84.5	-0.76294
84.5938	-0.7019		84.625	-0.73242
84.6875	-0.61035		84.75	-0.76294
84.7812	-0.73242		84.75	-0.7019
84.9062	-0.67139		84.875	-0.76294
85	-0.76294		85	-0.7019
85.0938	-0.64087		85.125	-0.67139
85.1875	-0.67139		85.25	-0.79346
85.2812	-0.76294		85.25	-0.7019
85.4062	-0.61035		85.375	-0.76294
85.5	-0.73242		85.5	-0.76294
85.5938	-0.7019		85.625	-0.7019
85.6875	-0.7019		85.75	-0.67139
85.7812	-0.64087		85.75	-0.79346
85.9062	-0.7019		85.875	-0.67139
86	-0.64087		86	-0.7019
86.0938	-0.67139		86.125	-0.79346
86.1875	-0.73242		86.25	-0.64087
86.2812	-0.64087		86.25	-0.79346
86.4062	-0.73242		86.375	-0.7019
86.5	-0.64087		86.5	-0.7019
86.5938	-0.73242		86.625	-0.64087
86.6875	-0.64087		86.75	-0.73242
86.7812	-0.7019		86.75	-0.57983
86.9062	-0.57983		86.875	-0.67139
87	-0.7019		87	-0.7019
87.0938	-0.67139		87.125	-0.61035
87.1875	-0.64087		87.25	-0.7019
87.2812	-0.73242		87.25	-0.7019
87.4062	-0.61035		87.375	-0.7019
87.5	-0.73242		87.5	-0.61035
87.5938	-0.67139		87.625	-0.7019
87.6875	-0.67139		87.75	-0.64087
87.7812	-0.64087		87.75	-0.64087
87.9062	-0.73242		87.875	-0.61035
88	-0.67139		88	-0.67139
88.0938	-0.76294		88.125	-0.7019
88.1875	-0.85449		88.25	-0.57983
88.2812	-0.7019		88.25	-0.76294
88.4062	-0.79346		88.375	-0.64087
88.5	-0.76294		88.5	-0.7019
88.5938	-0.73242		88.625	-0.73242
88.6875	-0.67139		88.75	-0.7019
88.7812	-0.73242		88.75	-0.64087
88.9062	-0.73242		88.875	-0.7019
89	-0.73242		89	-0.7019
89.0938	-0.79346		89.125	-0.64087
89.1875	-0.73242		89.25	-0.76294
89.2812	-0.79346		89.25	-0.61035
89.4062	-0.7019		89.375	-0.64087
89.5	-0.76294		89.5	-0.73242
89.5938	-0.7019		89.625	-0.67139
89.6875	-0.64087		89.75	-0.57983
89.7812	-0.76294		89.75	-0.67139
89.9062	-0.73242		89.875	-0.64087
90	-0.67139		90	-0.64087
90.0938	-0.7019		90.125	-0.76294
90.1875	-0.82397		90.25	-0.61035
90.2812	-0.64087		90.25	-0.73242
90.4062	-0.79346		90.375	-0.64087
90.5	-0.73242		90.5	-0.67139
90.5938	-0.7019		90.625	-0.73242
90.6875	-0.61035		90.75	-0.79346
90.7812	-0.64087		90.75	-0.79346
90.9062	-0.7019		90.875	-0.79346
91	-0.64087		91	-0.79346
91.0938	-0.7019		91.125	-0.79346
91.1875	-0.67139		91.25	-0.79346
91.2812	-0.73242		91.25	-0.67139
91.4062	-0.57983		91.375	-0.73242
91.5	-0.7019		91.5	-0.64087
91.5938	-0.7019		91.625	-0.61035
91.6875	-0.67139		91.75	-0.67139
91.7812	-0.76294		91.75	-0.67139
91.9062	-0.7019		91.875	-0.7019
92	-0.64087		92	-0.73242
92.0938	-0.7019		92.125	-0.79346
92.1875	-0.76294		92.25	-0.7019
92.2812	-0.64087		92.25	-0.79346
92.4062	-0.67139		92.375	-0.67139
92.5	-0.76294		92.5	-0.61035
92.5938	-0.7019		92.625	-0.7019
92.6875	-0.7019		92.75	-0.64087
92.7812	-0.73242		92.75	-0.64087
92.9062	-0.76294		92.875	-0.67139
93	-0.73242		93	-0.76294
93.0938	-0.73242		93.125	-0.64087
93.1875	-0.79346		93.25	-0.76294
93.2812	-0.67139		93.25	-0.67139
93.4062	-0.57983		93.375	-0.64087
93.5	-0.7019		93.5	-0.7019
93.5938	-0.64087		93.625	-0.7019
93.6875	-0.54932		93.75	-0.73242
93.7812	-0.73242		93.75	-0.64087
93.9062	-0.7019		93.875	-0.73242
94	-0.67139		94	-0.64087
94.0938	-0.73242		94.125	-0.76294
94.1875	-0.73242		94.25	-0.64087
94.2812	-0.61035		94.25	-0.67139
94.4062	-0.7019		94.375	-0.64087
94.5	-0.67139		94.5	-0.67139
94.5938	-0.61035		94.625	-0.67139
94.6875	-0.76294		94.75	-0.61035
94.7812	-0.7019		94.75	-0.7019
94.9062	-0.76294		94.875	-0.64087
95	-0.67139		95	-0.67139
95.0938	-0.7019		95.125	-0.61035
95.1875	-0.73242		95.25	-0.7019
95.2812	-0.76294		95.25	-0.64087
95.4062	-0.67139		95.375	-0.7019
95.5	-0.76294		95.5	-0.7019
95.5938	-0.76294		95.625	-0.54932
95.6875	-0.64087		95.75	-0.82397
95.7812	-0.82397		95.75	-0.7019
95.9062	-0.67139		95.875	-0.73242
96	-0.7019		96	-0.7019
96.0938	-0.76294		96.125	-0.76294
96.1875	-0.79346		96.25	-0.61035
96.2812	-0.7019		96.25	-0.76294
96.4062	-0.73242		96.375	-0.79346
96.5	-0.82397		96.5	-0.67139
96.5938	-0.64087		96.625	-0.79346
96.6875	-0.76294		96.75	-0.76294
96.7812	-0.64087		96.75	-0.79346
96.9062	-0.76294		96.875	-0.76294
97	-0.64087		97	-0.82397
97.0938	-0.73242		97.125	-0.76294
97.1875	-0.7019		97.25	-0.79346
97.2812	-0.67139		97.25	-0.76294
97.4062	-0.64087		97.375	-0.76294
97.5	-0.67139		97.5	-0.73242
97.5938	-0.73242		97.625	-0.76294
97.6875	-0.61035		97.75	-0.85449
97.7812	-0.76294		97.75	-0.82397
97.9062	-0.73242		97.875	-0.82397
98	-0.7019		98	-0.76294
98.0938	-0.76294		98.125	-0.82397
98.1875	-0.7019		98.25	-0.82397
98.2812	-0.61035		98.25	-0.82397
98.4062	-0.73242		98.375	-0.73242
98.5	-0.7019		98.5	-0.76294
98.5938	-0.7019		98.625	-0.76294
98.6875	-0.73242		98.75	-0.67139
98.7812	-0.7019		98.75	-0.7019
98.9062	-0.67139		98.875	-0.7019
99	-0.73242		99	-0.67139
99.0938	-0.67139		99.125	-0.7019
99.1875	-0.64087		99.25	-0.7019
99.2812	-0.67139		99.25	-0.64087
99.4062	-0.7019		99.375	-0.7019
99.5	-0.61035		99.5	-0.79346
99.5938	-0.67139		99.625	-0.64087
99.6875	-0.57983		99.75	-0.73242
99.7812	-0.79346		99.75	-0.7019
99.9062	-0.64087		99.875	-0.57983
100	-0.64087		100	-0.64087
100.094	-0.64087		100.125	-0.7019
100.188	-0.64087		100.25	-0.67139
100.281	-0.67139		100.25	-0.67139
100.406	-0.73242		100.375	-0.73242
100.5	-0.67139		100.5	-0.64087
100.594	-0.54932		100.625	-0.76294
100.688	-0.7019		100.75	-0.64087
100.781	-0.67139		100.75	-0.7019
100.906	-0.7019		100.875	-0.7019
101	-0.67139		101	-0.67139
101.094	-0.67139		101.125	-0.67139
101.188	-0.67139		101.25	-0.64087
101.281	-0.64087		101.25	-0.67139
101.406	-0.73242		101.375	-0.64087
101.5	-0.67139		101.5	-0.7019
101.594	-0.76294		101.625	-0.57983
101.688	-0.64087		101.75	-0.73242
101.781	-0.73242		101.75	-0.67139
101.906	-0.64087		101.875	-0.67139
102	-0.67139		102	-0.73242
102.094	-0.76294		102.125	-0.67139
102.188	-0.64087		102.25	-0.7019
102.281	-0.7019		102.25	-0.67139
102.406	-0.64087		102.375	-0.7019
102.5	-0.7019		102.5	-0.64087
102.594	-0.57983		102.625	-0.76294
102.688	-0.73242		102.75	-0.54932
102.781	-0.67139		102.75	-0.67139
102.906	-0.64087		102.875	-0.73242
103	-0.76294		103	-0.64087
103.094	-0.67139		103.125	-0.73242
103.188	-0.76294		103.25	-0.7019
103.281	-0.7019		103.25	-0.7019
103.406	-0.7019		103.375	-0.61035
103.5	-0.67139		103.5	-0.76294
103.594	-0.7019		103.625	-0.61035
103.688	-0.61035		103.75	-0.7019
103.781	-0.64087		103.75	-0.67139
103.906	-0.57983		103.875	-0.64087
104	-0.67139		104	-0.7019
104.094	-0.7019		104.125	-0.7019
104.188	-0.57983		104.25	-0.79346
104.281	-0.73242		104.25	-0.7019
104.406	-0.7019		104.375	-0.76294
104.5	-0.67139		104.5	-0.73242
104.594	-0.64087		104.625	-0.7019
104.688	-0.7019		104.75	-0.64087
104.781	-0.64087		104.75	-0.73242
104.906	-0.67139		104.875	-0.76294
105	-0.76294		105	-0.73242
105.094	-0.57983		105.125	-0.85449
105.188	-0.73242		105.25	-0.7019
105.281	-0.67139		105.25	-0.73242
105.406	-0.73242		105.375	-0.73242
105.5	-0.61035		105.5	-0.76294
105.594	-0.67139		105.625	-0.67139
105.688	-0.64087		105.75	-0.79346
105.781	-0.67139		105.75	-0.7019
105.906	-0.61035		105.875	-0.64087
106	-0.57983		106	-0.76294
106.094	-0.67139		106.125	-0.64087
106.188	-0.57983		106.25	-0.7019
106.281	-0.7019		106.25	-0.67139
106.406	-0.61035		106.375	-0.64087
106.5	-0.64087		106.5	-0.57983
106.594	-0.67139		106.625	-0.67139
106.688	-0.7019		106.75	-0.64087
106.781	-0.57983		106.75	-0.67139
106.906	-0.64087		106.875	-0.73242
107	-0.76294		107	-0.61035
107.094	-0.64087		107.125	-0.73242
107.188	-0.7019		107.25	-0.64087
107.281	-0.73242		107.25	-0.67139
107.406	-0.73242		107.375	-0.57983
107.5	-0.7019		107.5	-0.64087
107.594	-0.7019		107.625	-0.67139
107.688	-0.73242		107.75	-0.67139
107.781	-0.7019		107.75	-0.64087
107.906	-0.73242		107.875	-0.67139
108	-0.73242		108	-0.67139
108.094	-0.79346		108.125	-0.57983
108.188	-0.64087		108.25	-0.73242
108.281	-0.82397		108.25	-0.61035
108.406	-0.79346		108.375	-0.57983
108.5	-0.7019		108.5	-0.64087
108.594	-0.73242		108.625	-0.64087
108.688	-0.73242		108.75	-0.64087
108.781	-0.7019		108.75	-0.61035
108.906	-0.82397		108.875	-0.73242
109	-0.85449		109	-0.54932
109.094	-0.76294		109.125	-0.73242
109.188	-0.73242		109.25	-0.67139
109.281	-0.79346		109.25	-0.61035
109.406	-0.76294		109.375	-0.7019
109.5	-0.76294		109.5	-0.67139
109.594	-0.76294		109.625	-0.67139
109.688	-0.79346		109.75	-0.67139
109.781	-0.7019		109.75	-0.76294
109.906	-0.67139		109.875	-0.61035
110	-0.7019		110	-0.7019
110.094	-0.76294		110.125	-0.61035
110.188	-0.61035		110.25	-0.67139
110.281	-0.7019		110.25	-0.67139
110.406	-0.64087		110.375	-0.64087
110.5	-0.67139		110.5	-0.7019
110.594	-0.76294		110.625	-0.61035
110.688	-0.73242		110.75	-0.73242
110.781	-0.73242		110.75	-0.67139
110.906	-0.7019		110.875	-0.76294
111	-0.76294		111	-0.61035
111.094	-0.61035		111.125	-0.67139
111.188	-0.73242		111.25	-0.57983
111.281	-0.7019		111.25	-0.64087
111.406	-0.67139		111.375	-0.67139
111.5	-0.64087		111.5	-0.64087
111.594	-0.61035		111.625	-0.76294
111.688	-0.7019		111.75	-0.67139
111.781	-0.61035		111.75	-0.73242
111.906	-0.7019		111.875	-0.67139
112	-0.67139		112	-0.73242
112.094	-0.76294		112.125	-0.57983
112.188	-0.61035		112.25	-0.73242
112.281	-0.67139		112.25	-0.7019
112.406	-0.67139		112.375	-0.57983
112.5	-0.64087		112.5	-0.76294
112.594	-0.76294		112.625	-0.7019
112.688	-0.64087		112.75	-0.73242
112.781	-0.64087		112.75	-0.73242
112.906	-0.7019		112.875	-0.82397
113	-0.79346		113	-0.64087
113.094	-0.67139		113.125	-0.73242
113.188	-0.7019		113.25	-0.7019
113.281	-0.73242		113.25	-0.61035
113.406	-0.64087		113.375	-0.7019
113.5	-0.76294		113.5	-0.61035
113.594	-0.64087		113.625	-0.73242
113.688	-0.73242		113.75	-0.67139
113.781	-0.61035		113.75	-0.73242
113.906	-0.67139		113.875	-0.7019
114	-0.67139		114	-0.73242
114.094	-0.67139		114.125	-0.67139
114.188	-0.67139		114.25	-0.67139
114.281	-0.73242		114.25	-0.64087
114.406	-0.76294		114.375	-0.64087
114.5	-0.61035		114.5	-0.67139
114.594	-0.85449		114.625	-0.7019
114.688	-0.79346		114.75	-0.7019
114.781	-0.76294		114.75	-0.73242
114.906	-0.79346		114.875	-0.67139
115	-0.79346		115	-0.7019
115.094	-0.64087		115.125	-0.76294
115.188	-0.73242		115.25	-0.67139
115.281	-0.79346		115.25	-0.7019
115.406	-0.73242		115.375	-0.73242
115.5	-0.79346		115.5	-0.64087
115.594	-0.79346		115.625	-0.64087
115.688	-0.79346		115.75	-0.61035
115.781	-0.73242		115.75	-0.64087
115.906	-0.76294		115.875	-0.67139
116	-0.7019		116	-0.67139
116.094	-0.76294		116.125	-0.61035
116.188	-0.7019		116.25	-0.67139
116.281	-0.73242		116.25	-0.79346
116.406	-0.79346		116.375	-0.67139
116.5	-0.67139		116.5	-0.76294
116.594	-0.85449		116.625	-0.73242
116.688	-0.73242		116.75	-0.73242
116.781	-0.7019		116.75	-0.7019
116.906	-0.7019		116.875	-0.76294
117	-0.7019		117	-0.64087
117.094	-0.7019		117.125	-0.64087
117.188	-0.73242		117.25	-0.76294
117.281	-0.76294		117.25	-0.73242
117.406	-0.67139		117.375	-0.76294
117.5	-0.79346		117.5	-0.7019
117.594	-0.67139		117.625	-0.79346
117.688	-0.73242		117.75	-0.7019
117.781	-0.64087		117.75	-0.73242
117.906	-0.67139		117.875	-0.76294
118	-0.64087		118	-0.7019
118.094	-0.7019		118.125	-0.73242
118.188	-0.7019		118.25	-0.73242
118.281	-0.61035		118.25	-0.76294
118.406	-0.7019		118.375	-0.67139
118.5	-0.61035		118.5	-0.79346
118.594	-0.73242		118.625	-0.67139
118.688	-0.61035		118.75	-0.7019
118.781	-0.64087		118.75	-0.7019
118.906	-0.61035		118.875	-0.64087
119	-0.57983		119	-0.7019
119.094	-0.61035		119.125	-0.73242
119.188	-0.57983		119.25	-0.73242
119.281	-0.64087		119.25	-0.67139
119.406	-0.64087		119.375	-0.76294
119.5	-0.76294		119.5	-0.64087
119.594	-0.61035		119.625	-0.7019
119.688	-0.64087		119.75	-0.7019
119.781	-0.64087		119.75	-0.64087
119.906	-0.67139		119.875	-0.67139
120	-0.73242		120	-0.7019
120.094	-0.67139		120.125	-0.73242
120.188	-0.73242		120.25	-0.67139
120.281	-0.67139		120.25	-0.82397
120.406	-0.76294		120.375	-0.67139
120.5	-0.67139		120.5	-0.67139
120.594	-0.67139		120.625	-0.64087
120.688	-0.61035		120.75	-0.67139
120.781	-0.64087		120.75	-0.64087
120.906	-0.67139		120.875	-0.64087
121	-0.57983		121	-0.73242
121.094	-0.73242		121.125	-0.67139
121.188	-0.7019		121.25	-0.7019
121.281	-0.67139		121.25	-0.67139
121.406	-0.67139		121.375	-0.7019
121.5	-0.76294		121.5	-0.67139
121.594	-0.57983		121.625	-0.73242
121.688	-0.64087		121.75	-0.64087
121.781	-0.73242		121.75	-0.57983
121.906	-0.67139		121.875	-0.73242
122	-0.73242		122	-0.61035
122.094	-0.73242		122.125	-0.61035
122.188	-0.76294		122.25	-0.67139
122.281	-0.7019		122.25	-0.67139
122.406	-0.76294		122.375	-0.61035
122.5	-0.67139		122.5	-0.7019
122.594	-0.73242		122.625	-0.61035
122.688	-0.64087		122.75	-0.64087
122.781	-0.64087		122.75	-0.7019
122.906	-0.76294		122.875	-0.67139
123	-0.61035		123	-0.7019
123.094	-0.76294		123.125	-0.61035
123.188	-0.76294		123.25	-0.7019
123.281	-0.7019		123.25	-0.64087
123.406	-0.67139		123.375	-0.7019
123.5	-0.73242		123.5	-0.61035
123.594	-0.61035		123.625	-0.67139
123.688	-0.64087		123.75	-0.79346
123.781	-0.76294		123.75	-0.73242
123.906	-0.61035		123.875	-0.76294
124	-0.67139		124	-0.7019
124.094	-0.67139		124.125	-0.79346
124.188	-0.67139		124.25	-0.76294
124.281	-0.57983		124.25	-0.73242
124.406	-0.7019		124.375	-0.79346
124.5	-0.67139		124.5	-0.73242
124.594	-0.64087		124.625	-0.79346
124.688	-0.61035		124.75	-0.73242
124.781	-0.61035		124.75	-0.76294
124.906	-0.73242		124.875	-0.61035
125	-0.54932		125	-0.82397
125.094	-0.7019		125.125	-0.7019
125.188	-0.64087		125.25	-0.7019
125.281	-0.61035		125.25	-0.7019
125.406	-0.67139		125.375	-0.79346
125.5	-0.7019		125.5	-0.7019
125.594	-0.64087		125.625	-0.7019
125.688	-0.7019		125.75	-0.79346
125.781	-0.76294		125.75	-0.64087
125.906	-0.67139		125.875	-0.82397
126	-0.64087		126	-0.76294
126.094	-0.7019		126.125	-0.7019
126.188	-0.67139		126.25	-0.73242
126.281	-0.67139		126.25	-0.76294
126.406	-0.7019		126.375	-0.7019
126.5	-0.61035		126.5	-0.73242
126.594	-0.67139		126.625	-0.79346
126.688	-0.67139		126.75	-0.67139
126.781	-0.67139		126.75	-0.76294
126.906	-0.7019		126.875	-0.67139
127	-0.57983		127	-0.73242
127.094	-0.73242		127.125	-0.7019
127.188	-0.61035		127.25	-0.67139
127.281	-0.54932		127.25	-0.67139
127.406	-0.67139		127.375	-0.64087
127.5	-0.67139		127.5	-0.7019
127.594	-0.67139		127.625	-0.67139
127.688	-0.67139		127.75	-0.76294
127.781	-0.79346		127.75	-0.7019
127.906	-0.61035		127.875	-0.76294
128	-0.79346		128	-0.64087
128.094	-0.73242		128.125	-0.73242
128.188	-0.7019		128.25	-0.67139
128.281	-0.7019		128.25	-0.64087
128.406	-0.73242		128.375	-0.7019
128.5	-0.76294		128.5	-0.67139
128.594	-0.67139		128.625	-0.67139
128.688	-0.76294		128.75	-0.67139
128.781	-0.7019		128.75	-0.76294
128.906	-0.79346		128.875	-0.61035
129	-0.67139		129	-0.79346
129.094	-0.79346		129.125	-0.73242
129.188	-0.64087		129.25	-0.61035
129.281	-0.61035		129.25	-0.79346
129.406	-0.79346		129.375	-0.76294
129.5	-0.73242		129.5	-0.7019
129.594	-0.76294		129.625	-0.67139
129.688	-0.7019		129.75	-0.73242
129.781	-0.82397		129.75	-0.64087
129.906	-0.64087		129.875	-0.67139
130	-0.76294		130	-0.67139
130.094	-0.73242		130.125	-0.67139
130.188	-0.67139		130.25	-0.7019
130.281	-0.7019		130.25	-0.67139
130.406	-0.61035		130.375	-0.76294
130.5	-0.73242		130.5	-0.64087
130.594	-0.67139		130.625	-0.76294
130.688	-0.76294		130.75	-0.73242
130.781	-0.67139		130.75	-0.73242
130.906	-0.67139		130.875	-0.64087
131	-0.64087		131	-0.73242
131.094	-0.7019		131.125	-0.7019
131.188	-0.7019		131.25	-0.73242
131.281	-0.73242		131.25	-0.79346
131.406	-0.79346		131.375	-0.79346
131.5	-0.73242		131.5	-0.76294
131.594	-0.7019		131.625	-0.79346
131.688	-0.79346		131.75	-0.73242
131.781	-0.79346		131.75	-0.76294
131.906	-0.67139		131.875	-0.79346
132	-0.76294		132	-0.61035
132.094	-0.76294		132.125	-0.67139
132.188	-0.67139		132.25	-0.73242
132.281	-0.76294		132.25	-0.61035
132.406	-0.76294		132.375	-0.76294
132.5	-0.73242		132.5	-0.7019
132.594	-0.73242		132.625	-0.73242
132.688	-0.67139		132.75	-0.7019
132.781	-0.67139		132.75	-0.79346
132.906	-0.64087		132.875	-0.61035
133	-0.61035		133	-0.67139
133.094	-0.67139		133.125	-0.7019
133.188	-0.7019		133.25	-0.64087
133.281	-0.61035		133.25	-0.7019
133.406	-0.79346		133.375	-0.64087
133.5	-0.67139		133.5	-0.67139
133.594	-0.7019		133.625	-0.64087
133.688	-0.73242		133.75	-0.73242
133.781	-0.73242		133.75	-0.64087
133.906	-0.61035		133.875	-0.61035
134	-0.64087		134	-0.67139
134.094	-0.7019		134.125	-0.67139
134.188	-0.64087		134.25	-0.7019
134.281	-0.76294		134.25	-0.57983
134.406	-0.57983		134.375	-0.73242
134.5	-0.7019		134.5	-0.64087
134.594	-0.7019		134.625	-0.64087
134.688	-0.7019		134.75	-0.64087
134.781	-0.67139		134.75	-0.57983
134.906	-0.73242		134.875	-0.61035
135	-0.7019		135	-0.7019
135.094	-0.67139		135.125	-0.7019
135.188	-0.73242		135.25	-0.57983
135.281	-0.61035		135.25	-0.7019
135.406	-0.82397		135.375	-0.61035
135.5	-0.67139		135.5	-0.7019
135.594	-0.73242		135.625	-0.7019
135.688	-0.76294		135.75	-0.64087
135.781	-0.79346		135.75	-0.67139
135.906	-0.73242		135.875	-0.73242
136	-0.76294		136	-0.73242
136.094	-0.73242		136.125	-0.61035
136.188	-0.67139		136.25	-0.79346
136.281	-0.85449		136.25	-0.67139
136.406	-0.73242		136.375	-0.76294
136.5	-0.73242		136.5	-0.76294
136.594	-0.7019		136.625	-0.7019
136.688	-0.73242		136.75	-0.67139
136.781	-0.73242		136.75	-0.76294
136.906	-0.7019		136.875	-0.76294
137	-0.7019		137	-0.7019
137.094	-0.67139		137.125	-0.79346
137.188	-0.7019		137.25	-0.73242
137.281	-0.61035		137.25	-0.76294
137.406	-0.73242		137.375	-0.73242
137.5	-0.64087		137.5	-0.76294
137.594	-0.67139		137.625	-0.67139
137.688	-0.7019		137.75	-0.7019
137.781	-0.67139		137.75	-0.79346
137.906	-0.67139		137.875	-0.7019
138	-0.67139		138	-0.7019
138.094	-0.67139		138.125	-0.7019
138.188	-0.61035		138.25	-0.76294
138.281	-0.67139		138.25	-0.64087
138.406	-0.57983		138.375	-0.73242
138.5	-0.61035		138.5	-0.64087
138.594	-0.61035		138.625	-0.64087
138.688	-0.61035		138.75	-0.7019
138.781	-0.64087		138.75	-0.64087
138.906	-0.64087		138.875	-0.67139
139	-0.67139		139	-0.64087
139.094	-0.57983		139.125	-0.67139
139.188	-0.67139		139.25	-0.61035
139.281	-0.61035		139.25	-0.7019
139.406	-0.7019		139.375	-0.67139
139.5	-0.61035		139.5	-0.67139
139.594	-0.64087		139.625	-0.67139
139.688	-0.61035		139.75	-0.61035
139.781	-0.57983		139.75	-0.73242
139.906	-0.67139		139.875	-0.67139
140	-0.64087		140	-0.73242
140.094	-0.64087		140.125	-0.67139
140.188	-0.57983		140.25	-0.73242
140.281	-0.67139		140.25	-0.64087
140.406	-0.54932		140.375	-0.64087
140.5	-0.67139		140.5	-0.64087
140.594	-0.73242		140.625	-0.61035
140.688	-0.54932		140.75	-0.64087
140.781	-0.67139		140.75	-0.67139
140.906	-0.7019		140.875	-0.67139
141	-0.79346		141	-0.7019
141.094	-0.67139		141.125	-0.64087
141.188	-0.73242		141.25	-0.76294
141.281	-0.73242		141.25	-0.67139
141.406	-0.73242		141.375	-0.61035
141.5	-0.67139		141.5	-0.7019
141.594	-0.7019		141.625	-0.7019
141.688	-0.73242		141.75	-0.57983
141.781	-0.64087		141.75	-0.73242
141.906	-0.76294		141.875	-0.64087
142	-0.67139		142	-0.64087
142.094	-0.61035		142.125	-0.64087
142.188	-0.64087		142.25	-0.67139
142.281	-0.73242		142.25	-0.54932
142.406	-0.7019		142.375	-0.67139
142.5	-0.7019		142.5	-0.73242
142.594	-0.76294		142.625	-0.54932
142.688	-0.7019		142.75	-0.76294
142.781	-0.73242		142.75	-0.61035
142.906	-0.82397		142.875	-0.64087
143	-0.7019		143	-0.64087
143.094	-0.67139		143.125	-0.7019
143.188	-0.7019		143.25	-0.61035
143.281	-0.64087		143.25	-0.67139
143.406	-0.57983		143.375	-0.73242
143.5	-0.67139		143.5	-0.64087
143.594	-0.7019		143.625	-0.76294
143.688	-0.76294		143.75	-0.67139
143.781	-0.61035		143.75	-0.79346
143.906	-0.76294		143.875	-0.7019
144	-0.7019		144	-0.7019
144.094	-0.61035		144.125	-0.73242
144.188	-0.67139		144.25	-0.73242
144.281	-0.67139		144.25	-0.76294
144.406	-0.61035		144.375	-0.7019
144.5	-0.67139		144.5	-0.76294
144.594	-0.76294		144.625	-0.73242
144.688	-0.57983		144.75	-0.82397
144.781	-0.73242		144.75	-0.67139
144.906	-0.7019		144.875	-0.79346
145	-0.7019		145	-0.76294
145.094	-0.64087		145.125	-0.67139
145.188	-0.64087		145.25	-0.73242
145.281	-0.67139		145.25	-0.7019
145.406	-0.64087		145.375	-0.7019
145.5	-0.7019		145.5	-0.7019
145.594	-0.61035		145.625	-0.85449
145.688	-0.67139		145.75	-0.64087
145.781	-0.54932		145.75	-0.73242
145.906	-0.7019		145.875	-0.73242
146	-0.61035		146	-0.64087
146.094	-0.54932		146.125	-0.7019
146.188	-0.67139		146.25	-0.64087
146.281	-0.64087		146.25	-0.7019
146.406	-0.67139		146.375	-0.64087
146.5	-0.64087		146.5	-0.73242
146.594	-0.79346		146.625	-0.7019
146.688	-0.54932		146.75	-0.64087
146.781	-0.7019		146.75	-0.64087
146.906	-0.64087		146.875	-0.64087
147	-0.61035		147	-0.64087
147.094	-0.61035		147.125	-0.57983
147.188	-0.67139		147.25	-0.7019
147.281	-0.76294		147.25	-0.61035
147.406	-0.61035		147.375	-0.7019
147.5	-0.76294		147.5	-0.73242
147.594	-0.7019		147.625	-0.67139
147.688	-0.73242		147.75	-0.67139
147.781	-0.64087		147.75	-0.7019
147.906	-0.79346		147.875	-0.61035
148	-0.7019		148	-0.61035
148.094	-0.7019		148.125	-0.73242
148.188	-0.79346		148.25	-0.67139
148.281	-0.76294		148.25	-0.67139
148.406	-0.73242		148.375	-0.73242
148.5	-0.82397		148.5	-0.67139
148.594	-0.79346		148.625	-0.67139
148.688	-0.73242		148.75	-0.73242
148.781	-0.79346		148.75	-0.57983
148.906	-0.82397		148.875	-0.7019
149	-0.76294		149	-0.7019
149.094	-0.85449		149.125	-0.61035
149.188	-0.76294		149.25	-0.73242
149.281	-0.73242		149.25	-0.7019
149.406	-0.73242		149.375	-0.67139
149.5	-0.7019		149.5	-0.64087
149.594	-0.73242		149.625	-0.76294
149.688	-0.73242		149.75	-0.67139
149.781	-0.64087		149.75	-0.67139
149.906	-0.73242		149.875	-0.73242
150	-0.67139		150	-0.61035
150.094	-0.67139		150.125	-0.67139
150.188	-0.76294		150.25	-0.64087
150.281	-0.7019		150.25	-0.76294
150.406	-0.7019		150.375	-0.61035
150.5	-0.79346		150.5	-0.7019
150.594	-0.73242		150.625	-0.7019
150.688	-0.54932		150.75	-0.64087
150.781	-0.7019		150.75	-0.61035
150.906	-0.67139		150.875	-0.7019
151	-0.64087		151	-0.7019
151.094	-0.73242		151.125	-0.61035
151.188	-0.64087		151.25	-0.76294
151.281	-0.73242		151.25	-0.67139
151.406	-0.61035		151.375	-0.7019
151.5	-0.67139		151.5	-0.67139
151.594	-0.7019		151.625	-0.67139
151.688	-0.7019		151.75	-0.57983
151.781	-0.64087		151.75	-0.61035
151.906	-0.67139		151.875	-0.57983
152	-0.7019		152	-0.57983
152.094	-0.54932		152.125	-0.7019
152.188	-0.76294		152.25	-0.64087
152.281	-0.64087		152.25	-0.7019
152.406	-0.7019		152.375	-0.67139
152.5	-0.73242		152.5	-0.67139
152.594	-0.67139		152.625	-0.61035
152.688	-0.64087		152.75	-0.73242
152.781	-0.73242		152.75	-0.7019
152.906	-0.73242		152.875	-0.61035
153	-0.67139		153	-0.76294
153.094	-0.79346		153.125	-0.64087
153.188	-0.67139		153.25	-0.67139
153.281	-0.7019		153.25	-0.7019
153.406	-0.67139		153.375	-0.7019
153.5	-0.64087		153.5	-0.67139
153.594	-0.64087		153.625	-0.64087
153.688	-0.73242		153.75	-0.64087
153.781	-0.7019		153.75	-0.61035
153.906	-0.7019		153.875	-0.67139
154	-0.79346		154	-0.64087
154.094	-0.67139		154.125	-0.67139
154.188	-0.76294		154.25	-0.54932
154.281	-0.61035		154.25	-0.7019
154.406	-0.73242		154.375	-0.61035
154.5	-0.73242		154.5	-0.57983
154.594	-0.7019		154.625	-0.7019
154.688	-0.64087		154.75	-0.64087
154.781	-0.7019		154.75	-0.64087
154.906	-0.67139		154.875	-0.61035
155	-0.64087		155	-0.67139
155.094	-0.85449		155.125	-0.57983
155.188	-0.64087		155.25	-0.7019
155.281	-0.76294		155.25	-0.61035
155.406	-0.76294		155.375	-0.57983
155.5	-0.76294		155.5	-0.61035
155.594	-0.7019		155.625	-0.57983
155.688	-0.73242		155.75	-0.61035
155.781	-0.79346		155.75	-0.61035
155.906	-0.7019		155.875	-0.7019
156	-0.79346		156	-0.61035
156.094	-0.73242		156.125	-0.7019
156.188	-0.76294		156.25	-0.64087
156.281	-0.67139		156.25	-0.64087
156.406	-0.76294		156.375	-0.67139
156.5	-0.76294		156.5	-0.64087
156.594	-0.67139		156.625	-0.7019
156.688	-0.76294		156.75	-0.64087
156.781	-0.76294		156.75	-0.7019
156.906	-0.73242		156.875	-0.67139
157	-0.64087		157	-0.7019
157.094	-0.79346		157.125	-0.64087
157.188	-0.64087		157.25	-0.67139
157.281	-0.76294		157.25	-0.64087
157.406	-0.64087		157.375	-0.67139
157.5	-0.64087		157.5	-0.76294
157.594	-0.7019		157.625	-0.67139
157.688	-0.73242		157.75	-0.7019
157.781	-0.73242		157.75	-0.73242
157.906	-0.61035		157.875	-0.67139
158	-0.67139		158	-0.7019
158.094	-0.57983		158.125	-0.67139
158.188	-0.64087		158.25	-0.5188
158.281	-0.61035		158.25	-0.5188
158.406	-0.67139		158.375	-0.12207
158.5	-0.67139		158.5	0.39673
158.594	-0.61035		158.625	0.7019
158.688	-0.73242		158.75	1.49536
158.781	-0.67139		158.75	1.92261
158.906	-0.57983		158.875	1.77002
159	-0.7019		159	1.43433
159.094	-0.7019		159.125	1.25122
159.188	-0.64087		159.25	0.88501
159.281	-0.67139		159.25	0.5188
159.406	-0.7019		159.375	0.33569
159.5	-0.67139		159.5	0.03052
159.594	-0.67139		159.625	-0.03052
159.688	-0.73242		159.75	-0.27466
159.781	-0.61035		159.75	-0.33569
159.906	-0.67139		159.875	-0.45776
160	-0.7019		160	-0.48828
160.094	-0.67139		160.125	-0.61035
160.188	-0.67139		160.25	-0.64087
160.281	-0.64087		160.25	-0.7019
160.406	-0.67139		160.375	-0.79346
160.5	-0.73242		160.5	-0.7019
160.594	-0.57983		160.625	-0.88501
160.688	-0.76294		160.75	-0.76294
160.781	-0.67139		160.75	-0.85449
160.906	-0.64087		160.875	-0.82397
161	-0.64087		161	-0.85449
161.094	-0.67139		161.125	-0.88501
161.188	-0.5188		161.25	-0.97656
161.281	-0.61035		161.25	-0.94604
161.406	-0.79346		161.375	-0.91553
161.5	-0.61035		161.5	-1.00708
161.594	-0.76294		161.625	-0.82397
161.688	-0.73242		161.75	-1.00708
161.781	-0.67139		161.75	-0.94604
161.906	-0.67139		161.875	-0.91553
162	-0.73242		162	-0.94604
162.094	-0.7019		162.125	-0.97656
162.188	-0.64087		162.25	-0.94604
162.281	-0.67139		162.25	-0.94604
162.406	-0.67139		162.375	-1.12915
162.5	-0.73242		162.5	-0.94604
162.594	-0.64087		162.625	-1.06812
162.688	-0.79346		162.75	-0.97656
162.781	-0.67139		162.75	-0.91553
162.906	-0.61035		162.875	-0.91553
163	-0.67139		163	-0.91553
163.094	-0.7019		163.125	-0.88501
163.188	-0.64087		163.25	-0.85449
163.281	-0.67139		163.25	-0.97656
163.406	-0.79346		163.375	-0.91553
163.5	-0.54932		163.5	-0.97656
163.594	-0.7019		163.625	-0.85449
163.688	-0.67139		163.75	-0.94604
163.781	-0.54932		163.75	-0.88501
163.906	-0.57983		163.875	-0.88501
164	-0.67139		164	-0.91553
164.094	-0.67139		164.125	-0.88501
164.188	-0.54932		164.25	-0.91553
164.281	-0.61035		164.25	-0.91553
164.406	-0.30518		164.375	-0.88501
164.5	0.03052		164.5	-0.85449
164.594	0.39673		164.625	-0.94604
164.688	0.85449		164.75	-0.82397
164.781	1.40381		164.75	-0.91553
164.906	1.37329		164.875	-0.94604
165	1.0376		165	-0.85449
165.094	0.73242		165.125	-0.88501
165.188	0.48828		165.25	-0.85449
165.281	0.09155		165.25	-0.79346
165.406	-0.12207		165.375	-0.79346
165.5	-0.18311		165.5	-0.82397
165.594	-0.39673		165.625	-0.73242
165.688	-0.5188		165.75	-0.79346
165.781	-0.48828		165.75	-0.76294
165.906	-0.61035		165.875	-0.73242
166	-0.73242		166	-0.85449
166.094	-0.76294		166.125	-0.82397
166.188	-0.73242		166.25	-0.76294
166.281	-0.88501		166.25	-0.73242
166.406	-0.91553		166.375	-0.79346
166.5	-0.88501		166.5	-0.73242
166.594	-0.85449		166.625	-0.7019
166.688	-0.91553		166.75	-0.73242
166.781	-0.85449		166.75	-0.73242
166.906	-0.85449		166.875	-0.73242
167	-0.91553		167	-0.64087
167.094	-0.82397		167.125	-0.76294
167.188	-0.88501		167.25	-0.64087
167.281	-0.91553		167.25	-0.73242
167.406	-1.00708		167.375	-0.67139
167.5	-0.88501		167.5	-0.7019
167.594	-1.00708		167.625	-0.67139
167.688	-0.91553		167.75	-0.73242
167.781	-0.82397		167.75	-0.67139
167.906	-0.91553		167.875	-0.61035
168	-0.88501		168	-0.79346
168.094	-0.97656		168.125	-0.64087
168.188	-0.85449		168.25	-0.64087
168.281	-0.88501		168.25	-0.7019
168.406	-0.79346		168.375	-0.73242
168.5	-0.82397		168.5	-0.64087
168.594	-0.82397		168.625	-0.67139
168.688	-0.82397		168.75	-0.64087
168.781	-0.79346		168.75	-0.57983
168.906	-0.67139		168.875	-0.76294
169	-0.88501		169	-0.67139
169.094	-0.76294		169.125	-0.73242
169.188	-0.76294		169.25	-0.67139
169.281	-0.79346		169.25	-0.7019
169.406	-0.79346		169.375	-0.7019
169.5	-0.7019		169.5	-0.67139
169.594	-0.79346		169.625	-0.7019
169.688	-0.73242		169.75	-0.7019
169.781	-0.64087		169.75	-0.79346
169.906	-0.82397		169.875	-0.73242
170	-0.7019		170	-0.76294
170.094	-0.82397		170.125	-0.64087
170.188	-0.79346		170.25	-0.76294
170.281	-0.79346		170.25	-0.7019
170.406	-0.7019		170.375	-0.7019
170.5	-0.73242		170.5	-0.64087
170.594	-0.7019		170.625	-0.61035
170.688	-0.73242		170.75	-0.7019
170.781	-0.76294		170.75	-0.76294
170.906	-0.67139		170.875	-0.76294
171	-0.79346		171	-0.67139
171.094	-0.64087		171.125	-0.82397
171.188	-0.7019		171.25	-0.76294
171.281	-0.73242		171.25	-0.73242
171.406	-0.7019		171.375	-0.7019
171.5	-0.67139		171.5	-0.73242
171.594	-0.73242		171.625	-0.67139
171.688	-0.7019		171.75	-0.67139
171.781	-0.64087		171.75	-0.76294
171.906	-0.79346		171.875	-0.61035
172	-0.67139		172	-0.79346
172.094	-0.76294		172.125	-0.76294
172.188	-0.73242		172.25	-0.73242
172.281	-0.7019		172.25	-0.7019
172.406	-0.61035		172.375	-0.73242
172.5	-0.64087		172.5	-0.67139
172.594	-0.64087		172.625	-0.67139
172.688	-0.61035		172.75	-0.7019
172.781	-0.73242		172.75	-0.61035
172.906	-0.67139		172.875	-0.76294
173	-0.76294		173	-0.67139
173.094	-0.67139		173.125	-0.7019
173.188	-0.73242		173.25	-0.64087
173.281	-0.73242		173.25	-0.67139
173.406	-0.67139		173.375	-0.64087
173.5	-0.7019		173.5	-0.67139
173.594	-0.7019		173.625	-0.73242
173.688	-0.67139		173.75	-0.67139
173.781	-0.7019		173.75	-0.73242
173.906	-0.79346		173.875	-0.67139
174	-0.64087		174	-0.67139
174.094	-0.67139		174.125	-0.54932
174.188	-0.67139		174.25	-0.7019
174.281	-0.64087		174.25	-0.73242
174.406	-0.7019		174.375	-0.64087
174.5	-0.76294		174.5	-0.73242
174.594	-0.76294		174.625	-0.7019
174.688	-0.7019		174.75	-0.64087
174.781	-0.73242		174.75	-0.64087
174.906	-0.67139		174.875	-0.73242
175	-0.73242		175	-0.5188
175.094	-0.67139		175.125	-0.61035
175.188	-0.7019		175.25	-0.61035
175.281	-0.73242		175.25	-0.5188
175.406	-0.67139		175.375	-0.67139
175.5	-0.79346		175.5	-0.61035
175.594	-0.79346		175.625	-0.64087
175.688	-0.7019		175.75	-0.61035
175.781	-0.79346		175.75	-0.7019
175.906	-0.82397		175.875	-0.57983
176	-0.73242		176	-0.61035
176.094	-0.76294		176.125	-0.67139
176.188	-0.76294		176.25	-0.67139
176.281	-0.73242		176.25	-0.7019
176.406	-0.79346		176.375	-0.64087
176.5	-0.82397		176.5	-0.76294
176.594	-0.73242		176.625	-0.64087
176.688	-0.7019		176.75	-0.79346
176.781	-0.82397		176.75	-0.7019
176.906	-0.7019		176.875	-0.73242
177	-0.7019		177	-0.64087
177.094	-0.64087		177.125	-0.7019
177.188	-0.67139		177.25	-0.7019
177.281	-0.73242		177.25	-0.67139
177.406	-0.61035		177.375	-0.82397
177.5	-0.76294		177.5	-0.64087
177.594	-0.7019		177.625	-0.73242
177.688	-0.76294		177.75	-0.67139
177.781	-0.79346		177.75	-0.64087
177.906	-0.76294		177.875	-0.7019
178	-0.61035		178	-0.79346
178.094	-0.7019		178.125	-0.67139
178.188	-0.79346		178.25	-0.67139
178.281	-0.61035		178.25	-0.79346
178.406	-0.73242		178.375	-0.64087
178.5	-0.64087		178.5	-0.85449
178.594	-0.67139		178.625	-0.76294
178.688	-0.67139		178.75	-0.7019
178.781	-0.76294		178.75	-0.67139
178.906	-0.64087		178.875	-0.76294
179	-0.67139		179	-0.67139
179.094	-0.7019		179.125	-0.67139
179.188	-0.7019		179.25	-0.79346
179.281	-0.82397		179.25	-0.64087
179.406	-0.61035		179.375	-0.76294
179.5	-0.79346		179.5	-0.67139
179.594	-0.64087		179.625	-0.76294
179.688	-0.67139		179.75	-0.67139
179.781	-0.7019		179.75	-0.67139
179.906	-0.7019		179.875	-0.64087
180	-0.57983		180	-0.67139
180.094	-0.67139		180.125	-0.67139
180.188	-0.79346		180.25	-0.67139
180.281	-0.54932		180.25	-0.73242
180.406	-0.7019		180.375	-0.64087
180.5	-0.67139		180.5	-0.76294
180.594	-0.64087		180.625	-0.64087
180.688	-0.67139		180.75	-0.67139
180.781	-0.73242		180.75	-0.76294
180.906	-0.64087		180.875	-0.73242
181	-0.67139		181	-0.64087
181.094	-0.76294		181.125	-0.76294
181.188	-0.7019		181.25	-0.67139
181.281	-0.73242		181.25	-0.67139
181.406	-0.73242		181.375	-0.76294
181.5	-0.79346		181.5	-0.73242
181.594	-0.67139		181.625	-0.7019
181.688	-0.7019		181.75	-0.7019
181.781	-0.73242		181.75	-0.67139
181.906	-0.79346		181.875	-0.67139
182	-0.73242		182	-0.76294
182.094	-0.82397		182.125	-0.73242
182.188	-0.85449		182.25	-0.76294
182.281	-0.7019		182.25	-0.79346
182.406	-0.79346		182.375	-0.64087
182.5	-0.79346		182.5	-0.67139
182.594	-0.67139		182.625	-0.67139
182.688	-0.67139		182.75	-0.64087
182.781	-0.73242		182.75	-0.61035
182.906	-0.67139		182.875	-0.64087
183	-0.64087		183	-0.73242
183.094	-0.76294		183.125	-0.64087
183.188	-0.7019		183.25	-0.67139
183.281	-0.73242		183.25	-0.67139
183.406	-0.7019		183.375	-0.67139
183.5	-0.76294		183.5	-0.61035
183.594	-0.67139		183.625	-0.7019
183.688	-0.7019		183.75	-0.67139
183.781	-0.73242		183.75	-0.64087
183.906	-0.64087		183.875	-0.79346
184	-0.7019		184	-0.64087
184.094	-0.7019		184.125	-0.67139
184.188	-0.76294		184.25	-0.67139
184.281	-0.64087		184.25	-0.76294
184.406	-0.76294		184.375	-0.67139
184.5	-0.73242		184.5	-0.76294
184.594	-0.7019		184.625	-0.7019
184.688	-0.73242		184.75	-0.61035
184.781	-0.7019		184.75	-0.73242
184.906	-0.7019		184.875	-0.64087
185	-0.67139		185	-0.67139
185.094	-0.76294		185.125	-0.7019
185.188	-0.64087		185.25	-0.79346
185.281	-0.64087		185.25	-0.67139
185.406	-0.64087		185.375	-0.76294
185.5	-0.73242		185.5	-0.67139
185.594	-0.64087		185.625	-0.7019
185.688	-0.61035		185.75	-0.76294
185.781	-0.7019		185.75	-0.67139
185.906	-0.64087		185.875	-0.73242
186	-0.67139		186	-0.67139
186.094	-0.64087		186.125	-0.76294
186.188	-0.67139		186.25	-0.73242
186.281	-0.57983		186.25	-0.73242
186.406	-0.73242		186.375	-0.67139
186.5	-0.67139		186.5	-0.67139
186.594	-0.61035		186.625	-0.73242
186.688	-0.73242		186.75	-0.67139
186.781	-0.7019		186.75	-0.7019
186.906	-0.73242		186.875	-0.61035
187	-0.64087		187	-0.7019
187.094	-0.7019		187.125	-0.67139
187.188	-0.64087		187.25	-0.64087
187.281	-0.73242		187.25	-0.61035
187.406	-0.67139		187.375	-0.67139
187.5	-0.73242		187.5	-0.61035
187.594	-0.73242		187.625	-0.7019
187.688	-0.67139		187.75	-0.73242
187.781	-0.82397		187.75	-0.57983
187.906	-0.67139		187.875	-0.73242
188	-0.73242		188	-0.7019
188.094	-0.73242		188.125	-0.67139
188.188	-0.7019		188.25	-0.67139
188.281	-0.64087		188.25	-0.7019
188.406	-0.76294		188.375	-0.61035
188.5	-0.7019		188.5	-0.67139
188.594	-0.73242		188.625	-0.76294
188.688	-0.85449		188.75	-0.61035
188.781	-0.67139		188.75	-0.73242
188.906	-0.79346		188.875	-0.67139
189	-0.73242		189	-0.67139
189.094	-0.79346		189.125	-0.64087
189.188	-0.73242		189.25	-0.67139
189.281	-0.76294		189.25	-0.67139
189.406	-0.7019		189.375	-0.7019
189.5	-0.67139		189.5	-0.76294
189.594	-0.79346		189.625	-0.7019
189.688	-0.73242		189.75	-0.7019
189.781	-0.82397		189.75	-0.61035
189.906	-0.64087		189.875	-0.7019
190	-0.7019		190	-0.7019
190.094	-0.76294		190.125	-0.73242
190.188	-0.7019		190.25	-0.67139
190.281	-0.67139		190.25	-0.64087
190.406	-0.7019		190.375	-0.64087
190.5	-0.7019		190.5	-0.7019
190.594	-0.7019		190.625	-0.73242
190.688	-0.79346		190.75	-0.7019
190.781	-0.64087		190.75	-0.79346
190.906	-0.73242		190.875	-0.73242
191	-0.73242		191	-0.79346
191.094	-0.7019		191.125	-0.82397
191.188	-0.64087		191.25	-0.73242
191.281	-0.67139		191.25	-0.82397
191.406	-0.7019		191.375	-0.73242
191.5	-0.67139		191.5	-0.67139
191.594	-0.79346		191.625	-0.7019
191.688	-0.64087		191.75	-0.79346
191.781	-0.76294		191.75	-0.64087
191.906	-0.67139		191.875	-0.73242
192	-0.73242		192	-0.76294
192.094	-0.73242		192.125	-0.67139
192.188	-0.7019		192.25	-0.76294
192.281	-0.79346		192.25	-0.7019
192.406	-0.79346		192.375	-0.67139
192.5	-0.7019		192.5	-0.67139
192.594	-0.76294		192.625	-0.76294
192.688	-0.76294		192.75	-0.64087
192.781	-0.7019		192.75	-0.73242
192.906	-0.67139		192.875	-0.7019
193	-0.67139		193	-0.73242
193.094	-0.67139		193.125	-0.7019
193.188	-0.64087		193.25	-0.64087
193.281	-0.79346		193.25	-0.73242
193.406	-0.76294		193.375	-0.67139
193.5	-0.64087		193.5	-0.73242
193.594	-0.79346		193.625	-0.7019
193.688	-0.7019		193.75	-0.73242
193.781	-0.67139		193.75	-0.61035
193.906	-0.57983		193.875	-0.7019
194	-0.64087		194	-0.7019
194.094	-0.67139		194.125	-0.67139
194.188	-0.61035		194.25	-0.73242
194.281	-0.76294		194.25	-0.61035
194.406	-0.73242		194.375	-0.73242
194.5	-0.7019		194.5	-0.64087
194.594	-0.7019		194.625	-0.57983
194.688	-0.76294		194.75	-0.61035
194.781	-0.57983		194.75	-0.67139
194.906	-0.7019		194.875	-0.61035
195	-0.76294		195	-0.54932
195.094	-0.64087		195.125	-0.67139
195.188	-0.76294		195.25	-0.54932
195.281	-0.73242		195.25	-0.7019
195.406	-0.76294		195.375	-0.64087
195.5	-0.67139		195.5	-0.64087
195.594	-0.73242		195.625	-0.61035
195.688	-0.7019		195.75	-0.7019
195.781	-0.7019		195.75	-0.61035
195.906	-0.7019		195.875	-0.61035
196	-0.73242		196	-0.64087
196.094	-0.76294		196.125	-0.61035
196.188	-0.61035		196.25	-0.73242
196.281	-0.82397		196.25	-0.67139
196.406	-0.7019		196.375	-0.76294
196.5	-0.7019		196.5	-0.64087
196.594	-0.67139		196.625	-0.67139
196.688	-0.73242		196.75	-0.73242
196.781	-0.61035		196.75	-0.67139
196.906	-0.7019		196.875	-0.64087
197	-0.76294		197	-0.73242
197.094	-0.57983		197.125	-0.73242
197.188	-0.76294		197.25	-0.64087
197.281	-0.76294		197.25	-0.82397
197.406	-0.73242		197.375	-0.73242
197.5	-0.64087		197.5	-0.73242
197.594	-0.73242		197.625	-0.76294
197.688	-0.61035		197.75	-0.7019
197.781	-0.61035		197.75	-0.67139
197.906	-0.67139		197.875	-0.76294
198	-0.67139		198	-0.7019
198.094	-0.7019		198.125	-0.76294
198.188	-0.64087		198.25	-0.85449
198.281	-0.73242		198.25	-0.76294
198.406	-0.7019		198.375	-0.79346
198.5	-0.67139		198.5	-0.85449
198.594	-0.7019		198.625	-0.79346
198.688	-0.76294		198.75	-0.67139
198.781	-0.7019		198.75	-0.73242
198.906	-0.79346		198.875	-0.73242
199	-0.79346		199	-0.67139
199.094	-0.67139		199.125	-0.79346
199.188	-0.64087		199.25	-0.64087
199.281	-0.7019		199.25	-0.73242
199.406	-0.61035		199.375	-0.67139
199.5	-0.64087		199.5	-0.7019
199.594	-0.67139		199.625	-0.67139
199.688	-0.61035		199.75	-0.7019
[truncated: 98,003 more rows]

## Sheet: E iii
ACSF	ZD7288	ACSF
2.64	0	1
1.85	1.6	1.74
1.23	0.36	0.98
3.04	1.92	2.38
1.11	0.9	1.88
2.75	1.25	1.74
2.42	1.97	1.68
0.91	0.36	0.42
0.82	0.49	0.77
