# Supplementary material for: The cation channel mechanisms of subthreshold inward depolarizing currents in the mice VTA dopaminergic neurons and their roles in the chronic-stress-induced depression-like behavior
Source: eLife. 2024 Dec 6;12:RP88319. doi: 10.7554/eLife.88319 (PMC11623934; doi:10.7554/eLife.88319)
Supplement: Figure 2—source data 1. [file elife-88319-fig2-data1.xlsx]

## Sheet: Figure 2 A
					NAc c-VTA								NAc m-VTA										NAc l-VTA												BLA-VTA									Mpfc-VTA
	gene_name	c1	c2	c3	c4	c5	c6	c7	m1	m2	m3	m4	m5	m6	m7	m8	l1	l2	l3	l4	l5	l6	l7	l8	l9	l10	l11	l12	l13	b1	b2	b3	b4	b5	b6	b7	b8	b9	b10	p1	p2	p3	p4	p5	p6	p7
	Th	11.1981	11.2006	11.1025	10.9678	11.0046	11.5187	11.2033	11.0422	11.1882	11.4833	11.0324	11.1367	12.0214	11.3966	11.5058	10.5259	10.6265	10.8865	10.9795	11.0115	11.4574	11.5174	11.2365	11.58	11.4626	11.5703	11.4893	11.4566	10.1794	9.89719	10.844	10.8503	10.898	11.5594	9.76065	10.6218	10.4722	11.0736	11.5053	11.5652	11.4078	11.2597	11.5997	11.7984	11.4486
Dopaminergic	Ddc	9.27524	9.31773	8.63808	9.02007	8.75411	9.54784	8.8079	8.81216	9.30345	9.15832	8.83753	8.96583	8.84318	8.80501	9.05514	8.79662	8.14201	8.30294	8.97023	8.73346	8.97682	9.17834	9.31341	9.25795	8.67383	9.22373	9.27301	9.33528	8.98959	8.79411	9.3359	9.34496	9.42006	7.86727	8.4581	8.54082	9.14528	8.45576	8.56504	8.39056	8.44395	7.81264	8.3803	8.50443	8.13118
	Slc6a3	11.084	12.2328	10.6117	11.508	10.3296	11.3026	11.1657	10.5922	11.3225	10.6226	10.4094	10.5881	10.8626	10.6966	10.8026	10.7079	8.27768	12.1923	12.2311	12.0484	12.4345	11.851	12.105	10.9056	11.5552	10.5862	11.1809	11.0985	11.1713	11.5267	11.3991	11.4186	11.0652	7.01253	10.7456	10.4942	11.7663	6.79054	7.80924	12.8873	8.62541	8.7031	9.23706	7.93149	9.25338
	Gad1	2.20925	0.118448	0.019581	0.0283181	0.0190349	0	0	0.0324092	2.39585	4.0779	0.0283095	0	0	0	0	0	0.0217122	0.00946491	0.768931	0.0489953	0.564095	1.05219	0	0	0	0.493031	0.0145238	0.16616	0.431437	0	0	0	0	0.0822069	0	2.6527	0	0	0.0209552	0.0655134	1.1678	0.0294098	0	1.83277	0
GABAergic	Gad2	0	0.324982	0.0973725	0	3.37835	0.392039	0	0.0276434	0.212822	0.121661	0.0789735	0	0	0.928874	0.0359511	0.045114	0.250257	0.238057	0.0325893	2.6717	4.02179	0	0.025119	0	0	0	0	4.73279	0	0.0725998	0.0359751	1.17104	0.0334985	0	3.48311	3.73463	1.76175	1.61915	1.67485	0.250865	0	0.0333646	0.0167321	0	0
	Slc6a1	0.171376	5.25989	3.94775	0.127169	3.83978	0.0701036	4.71334	1.00897	3.99667	5.11797	1.23596	4.27453	0.0246262	0.0499448	0.0624788	2.92296	5.20466	5.22262	6.05986	5.31059	0.169679	2.82711	4.80611	4.26604	0.0476862	0.0667337	4.17771	0.0851385	3.36224	2.56239	3.81928	0.0298531	3.06055	3.50672	3.77199	2.46156	5.32104	3.17869	3.81219	0.353436	3.28599	4.32015	2.69341	1.89986	4.78944
	Slc32a1	0	0	0	0	0	0	0	0	0	0	0	0	0	0	0	0	0	0	0.228014	0.536138	0	0	0	0	0	0	0	0	0	0	0	0	0	0	0	0	0.652239	0	0	0	0.325018	0	0	0.266234	0
	Slc17a6	0	0	0.0682151	0.0660305	1.13234	0.135425	0.0754594	5.30601	0.0330958	0.0175017	4.67614	4.90781	6.38903	1.19865	5.12043	0.0923177	0.0998341	0.0657827	1.08726	0.0332548	2.35175	0.103803	0.101753	6.23149	0.110651	0.0897311	0.0171495	0.0510869	6.11218	3.66639	3.22815	0.230945	0.105699	6.29712	6.7986	1.11694	4.87527	6.91385	4.66684	5.43234	5.22307	6.28956	5.29201	5.0829	5.83862
Glutamatergic	Slc17a7	2.35747	0.501718	1.59262	0.401869	4.76848	0	0	3.51977	0.579651	0.423005	0.674761	0	0	0	0	0.0459601	0.610169	1.25945	0.432083	0.185319	2.37642	0	0	0	0	0	0	0	0.559315	0	0	1.71275	0	0	0.980679	0	3.64816	2.18191	1.1183	1.57323	0	2.47944	0.0691115	1.21351	0.0315912
	Slc17a8	0	0	0	0	0	0	0	0	0	0	0	0	0.0157181	0	0	0	0	0	0	0	0	0	0	0	0	0	0	0	0	0	0	0	0	0	0	0	0	0	0	0	0	0	0	0	0

## Sheet: Figure 2 B i
					NAc c-VTA								NAc m-VTA										NAc l-VTA												BLA-VTA									Mpfc-VTA
		c1	c2	c3	c4	c5	c6	c7	m1	m2	m3	m4	m5	m6	m7	m8	l1	l2	l3	l4	l5	l6	l7	l8	l9	l10	l11	l12	l13	b1	b2	b3	b4	b5	b6	b7	b8	b9	b10	p1	p2	p3	p4	p5	p6	p7	mean
	Trpa1	0	0.0195693	0	0	0	0	0	0	0	0	0	0	0	0	0	0	0	0	0	0	0	0	0	0	0	0	0	0	0	0	0	0	0	0	0	0	0	0	0	0	0	0	0	0	0	0.000434874
	Trpc1	1.40801	3.16529	3.23994	0.0492381	3.49598	0.0250405	3.00336	0.0424094	1.24015	0.0762403	0.0684444	0	0	0.0133369	0.0332908	5.2839	0.00763916	0.0393663	2.10799	3.18977	2.43897	1.53442	2.76222	0.0363594	0	2.60392	0.0378445	0.0342782	2.93658	0.0362817	3.50162	0.0924406	1.71977	0	0	0	2.17375	0.0240599	1.62411	0.0278962	0.0208458	0	1.31132	2.30011	3.02352	1.21622
	Trpc2	0	0	0	0	0	0	0	0	0	0	0	0	0	0	0	0	0	0	0	0	0	0	0	0	0	0	0	0	0	0	0	0	0	0	0	0	0	0	0	0	0	0	0	0	0	0
	Trpc3	0	0	0	0	0	0	0	0	0	0	0	0	0	0	0	0	0	0	0	0	0	0	0	0	0	0	0	0	0	0	0	0	0	0	0	0	0	0	0	0	0	3.54438	0	0	0	0.0787641
	Trpc4	0	0.0287503	0.100731	0.0167214	0.0251262	0.0105602	0.0143833	0.0215222	0	2.37119	1.35715	2.78309	0.10599	0.0112064	0	0.0235385	0.0191706	0	0	0	0.00722796	1.64454	0	0	0.0834245	0	2.29431	0	2.05028	2.99182	2.36088	0.115487	3.31274	0.01485	0.109607	0	2.69277	0	0	0.0916177	1.83931	3.1544	1.73339	0.0520722	0	0.698619
	Trpc5	0	0	0	0	0	0	0	0	0	0	0.629782	0	0	0	0	0	1.01696	0	0	0.229757	0.015045	0	0	0.0631257	0	0	0.0133825	0.259015	0	0	0	0	0	0	0	0.135514	0	0.122211	0	0	0	4.30627	0	0.713022	0	0.166757
	Trpc6	5.81399	6.74171	5.48519	5.86992	0.291209	6.22911	4.01057	1.5614	4.67256	5.0367	0.366583	1.50194	6.36687	5.3206	1.50901	3.02324	0.288463	5.79047	4.64052	5.27504	6.19085	5.80414	5.36707	5.44992	6.62435	5.20154	5.43863	6.14626	3.54481	4.35578	0.432505	5.46235	0.61018	0.0282088	3.85238	0.0321471	0.178825	0	0	0	0.0784312	0.0625406	1.57382	1.85651	0.737762	3.3072
	Trpc7	0	0.0469099	0	0	0	0	0	0	3.2275	1.43079	0	2.81822	0	0	2.26449	0.0257486	0.0140124	0	3.17666	0	0	0	0	0	0	0	0	0	2.11185	2.95265	0	0	0	0	0	0.389483	0	0	0	0	0	0	0	0	0	0.410185
	Trpm1	0	0	0	0	0	0	0	0	0	0	0	0	0	0	0	0	0	0	0	0	0	0	0	0	0	0	0	0	0	0	0	0	0	0	0	0	0	0	0	0	0	0	0	0	0	0
	Trpm2	0.0101481	0.0238812	0	2.13981	1.97293	3.26095	0	2.58055	2.40741	0.00869659	0.00556412	0	0	0	0	0.0311464	3.73955	0	0.0445887	1.75561	0.00958657	1.68043	0.112966	2.06317	0	0.00572149	0	0	0	2.2656	2.00473	0	0.42972	0	0	0.180175	1.0966	0	0.968752	1.67237	2.43118	2.04916	2.37026	1.52252	1.02691	0.886015
	Trpm3	1.78867	0.0335322	0	0.00979106	0.00984006	0	0	0	2.66674	0.00766069	0.0482926	0.936743	0	0	0	0.0274617	4.29668	0.0386248	0.019804	1.84755	1.03617	0	0	3.32116	0	0.363908	0	0	1.39628	1.18525	0.00732981	2.18365	0	1.47651	0	0	0.982298	0.0079111	1.84822	2.60053	0.0102616	2.29029	3.52247	3.32949	4.50294	0.928802
	Trpm4	4.0939	0	0	3.99818	0	0	0	0.0388549	0.050209	0.0178049	5.49749	0	0	0	0	0.0319755	0	0.0449451	0.0230691	0	0	0	0	0	0	1.9533	1.80449	0.79372	0	0	0	0.979267	0.0158477	4.01618	1.86897	0	2.28111	1.14102	0.81823	2.37758	0.74611	0	1.01016	0.377357	1.84822	0.796178
	Trpm5	0.222949	0	0	0	0	0	0	0	0	0	0	0	0	0	0	0	0	0	0	0	0	0	0	0	0	0	0	0	0	0	0	0	0	0	0	0	0	0	0	0	0.0700607	0	0	0	0	0.00651133
	Trpm6	0	0	0	0	0	0	0	0	0	0	0	0	0	0	0	0	0	0	0	0	0	0	0	0.0361754	0	0	0	0	0	0	0	0	0	0	0	0	0	0	0	0	0	0	0	0	0	0.000803899
	Trpm7	0.968642	1.40998	0.0348536	0.841932	0	2.50649	2.86319	0.847655	1.57986	0.0176725	2.59375	1.25738	0.688651	0.337729	0.00636028	3.07766	0.0721174	0.119542	0	2.61694	0.255433	0.0224759	1.38488	1.09753	0.779532	1.80876	1.38835	2.38884	2.03288	3.0115	1.56436	0.844251	1.19284	1.60548	0.6238	0.390793	2.72263	0.938523	1.44086	3.03071	0.544633	0.399962	0.924868	1.68723	1.29381	1.22701
	Trpm8	0	0	0	0	0	0	0	0	0	0	0	0	0	0	0	0	0	0	0	0	0	0	0	0	0	0	0	0	0	0	0	0	0	0	0	0	0	0	0	0	0	1.86455	0	0	0	0.0414344
	Trpv1	0	0	0	0	0	0	0	0	0	0	0	0	0	0	0	0	0	0	0	0	0	0	0	0	0	0	0	0	0	0	0	0	0	0	0	0	0	0	1.73735	0.0228187	0	2.65826	0.331615	1.89391	0	0.147644
	Trpv2	3.37302	5.96989	4.84061	4.87603	0.407722	3.79409	4.62395	3.43818	4.86266	3.07939	0.209703	4.17919	0	3.43223	2.77441	0.458061	4.23186	4.24515	3.77391	3.77268	4.37413	4.35978	3.37601	0.179834	4.8248	3.118	4.08047	4.98019	4.60062	4.7394	4.4024	5.0043	4.44126	0.0455062	3.493	0.396912	4.08722	3.55205	1.98966	4.18693	4.22909	4.07977	4.37455	4.38882	3.53876	3.49303
	Trpv3	0	0	0.0340703	0	0	0	0	0	0.152698	0	0	0.0162465	0	0	0	0	0	0	0	0	0	0	0	0	0	0	0	0.0191185	0	0	0	0	0	0	0	0	0	0	0	0.0461376	0	0	0	0	0	0.00596157
	Trpv4	0	0	0	0	0	0	0	0	0	0	0	0	0	0	0	0	0	0	0	0	0	0	0	0	0	0	0	0	0	0	0	0	0	0	0	0	0	0	0	0	0	0	0	0	0	0
	Trpv5	0	0	0	0	0	0	0	0	0	0	0	0	0	0	0	0	0	0	0	0	0	0	0	0	0	0	0	0	0	0	0	0	0	0	0	0	0	0	0	0	0	0	0	0	0	0
	Trpv6	0	0.709916	0	0	0	0	0	0	0	0	0	0	0	0	1.1028	0	0	0	0	0	0	0	0	0	0	0	0	0	0	0	0	0	0	0	0	0	0	0	0	0	0	0	0.554743	0	0	0.0526101

## Sheet: Figure 2 B ii
					NAc c-VTA								NAc m-VTA										NAc l-VTA												BLA-VTA									Mpfc-VTA
		c1	c2	c3	c4	c5	c6	c7	m1	m2	m3	m4	m5	m6	m7	m8	l1	l2	l3	l4	l5	l6	l7	l8	l9	l10	l11	l12	l13	b1	b2	b3	b4	b5	b6	b7	b8	b9	b10	p1	p2	p3	p4	p5	p6	p7	mean
	Calhm1	0	0	0	0	0	0	0	0	0	0	0	0	0	0	0	0	0	0	0	0	0	0	0	0	0	0	0	0	0	0	0	0	0	0	0	0	0	0	0	0	0	0	0	0	0	0
	Calhm2	0	0	0	0	0	0	0	0	0	0	0	0	0	0	0	0	0	0.136768	0.0207293	0	0	0	0	0	0	0	0	0	0	0	0	0	0	0	0.0184587	0	0	0	0	0	0	0	0	0	0	0.00391014
	Calhm3	0	0	0	0	0	0	0	0	0	0	0	0	0	0	0	0	0	0	0	0	0	0	0	0	0	0	0	0	0	0	0	0	0	0	0	0	0	0	0	3.0937	0	0	0	0	0	0.0687489
	Cnga1	0	0	0	0	0	0	0	0	0	0	0	0	0	0	0	0	0	0	0	0	0	0	0	0	0	0	0	0	0	0	0	0	0	0	0	0	0	0	0	0.138571	0	0	0	0	0	0.00307936
	Cnga2	0	0	0	0	0	0	0	0	0	0	0	0	0	0	0	0	0	0	0	0	0	0	0	0	0	0	0	0	0	0	0	0	0	0	0	0	0	0	0	0	0	0	0	0	0	0
	Cnga3	0	0	0	0	0	0	0	0	0	0	0	0	0	0	0	0	0	0	0	0	0	0	0	0	0	0	0	0	0	0	0	0	0	0	0	0	0	0	0	0	0.44863	0	0	0	0	0.00996955
	Cnga4	0	0	0	0	0	0	0	0	0	0	0	0	0	0	0	0	0	0	0	0	0	0	0	0	0	0	1.564	0	0	0	0	0	0	0	0	0	0	0	0	0	0	0	0	3.05667	0	0.102682
	Cngb1	0	0	1.28163	3.15653	0	0	0	0	0.0233705	0	0	0	0	0	0	0	0.00604794	0.0157033	0	0.0117894	0	0	0	0	0	0	0	0	0	0.691187	0	0	0	0	0	0.0159479	0.742449	0.00638498	0	1.73454	0	0	0	0	0.178092	0.174748
	Cngb3	0	0	0	0	0	0	0	0	0	0	0	0	0	0	0	0	0	0	0	0	0	0	0	0	0	0	0	0	0	0	0	0	0	0	0	0	0	0	0	0	0	0	0	0	0	0
	Hcn1	0	0.157796	0	0	0	0	0	0	0	0	0	0	0	0	0	0	0	0.0539556	0	0	0	0	0	0	0	0	0	0	0	0	0	0	0	0	0	0	0	0	0	0.598914	0.00531181	0	0	0.00532608	0	0.0182512
	Hcn2	2.46174	3.81934	4.2062	5.13424	2.32533	0	0.0751036	0.163722	2.78427	4.51161	1.23344	0.105831	4.0768	0.115237	4.83871	0.958006	3.13089	4.99362	4.56971	3.44279	3.12994	3.59397	3.8797	0.2045	2.92599	0	3.82939	1.85552	3.85136	0	2.31085	0.879026	4.15502	3.46243	0.0200975	0	3.91267	0.889766	2.23181	2.47646	0.751834	2.67611	0.688523	0.0912567	2.50483	2.29484
	Hcn3	4.71388	0.198118	4.7448	4.4642	0.197686	3.14277	0.827655	3.93732	4.3174	0.192578	5.72606	0.0672726	0	0.0462848	3.63203	0.350466	5.66128	5.16172	4.80815	3.70722	4.72228	2.88237	4.16675	5.15767	3.53568	1.0453	3.64686	0.0400104	5.2054	4.72973	3.04599	3.72976	4.41899	3.72273	0.590509	0.0523787	2.9521	3.5076	4.68885	5.2066	4.44853	3.3087	4.07348	4.22105	6.20289	3.22665
	Hcn4	2.99695	0	0	0	0.0505822	0	0	0	0	0	0.0253704	0	0	0	0	0	0.0386657	0	0	0	2.25234	0	2.53406	0.120351	4.13059	0	1.4031	0	0	0.0462282	0	0	3.29346	0	0.0229429	0	0.781686	0	0	0	0.719749	0	0.400213	0.963217	0.11424	0.442084
	Nalcn	0.153714	0.61519	3.89171	4.38564	3.18787	4.29927	0.0462749	5.03368	4.37598	4.82971	0.155346	4.92376	0	3.72242	3.94404	4.65243	5.87079	5.9496	6.14412	4.81355	3.72916	1.02973	4.25759	5.33698	2.43641	2.86412	4.20215	4.0476	4.47267	4.90316	4.64647	4.2247	3.00601	4.65599	0.152134	0.681735	3.64683	4.16375	3.0108	4.10795	2.38615	3.69398	2.33066	2.67351	3.08754	3.43873
	P2rx1	0	0	0	0	0	0	0	0	0	0	0	0	0	0	0	0	0	0	0	0	0	0	0	0	0	0	0	0	0	0	0	0	0	0	0	0	0	0	0	0.187117	0	0	0	0	0	0.00415815
	P2rx2	0	0	0	0	0	0	0	0	0	0	0	0	0	0	0	0	0	0	0	0	0	0	0	0	0	0	0	0	0	0	0	0	0	0	0	0	0	0	0	0	0	0	0	0	0.413808	0.00919573
	P2rx3	0	0	0	0	0	0	0	0	0	0	0	0	0	0	0	0	0	0	0	0.178526	0	0	0	0	0	0	0	0	0	0	0	0	0	0	0	0	0	0	2.5385	0	0	0	0	0	0	0.0603783
	P2rx4	1.58016	0.034956	0.0314361	0.0404252	0.0305579	0.0128572	0.0175068	1.84328	0.037585	0.0626924	3.26821	0	2.42544	0.0271719	0.0563112	0.0143862	0.0233253	0.0599793	1.71256	1.37959	0	1.41625	0.0159007	1.85577	2.34173	1.5055	3.37585	0	0.0233103	0.0186733	1.42139	0.835274	1.47435	0.360232	0	0.0205867	1.38628	0.457035	2.34937	0.0143372	2.317	0	1.64121	0.480864	3.11456	0.868531
	P2rx5	0	0	0	0	0	0	0	0	0	0	0	0	0	0	0	0	0	0	0	0	0	0	0	0	0	0	0	0	0	0	0	0	0.0522497	0	0	1.29166	2.58533	0	0	0	0	0	0	0	0	0.0873164
	P2rx6	0	0	0	0	0	0	0	0	0	0	0	0	0	0	0	0	0	0	0	1.20652	0	0	0.426684	0	0	0	0	0	0	0	0	0	0	0	0.311912	0	0	0	0	0	0	0	0	0	1.2776	0.0716161
	P2rx7	0	0	0	0	0	0	0	0	0	0	0	0	0	0	0	0	0	0	0	0	0	0	0	0.0111267	0	1.70168	0	0	0	0	0	0	0.467113	0	0	0	0	0	0	0	0	0	0	1.64364	0	0.0849681
	Panx1	5.48187	4.80568	5.45379	5.11183	5.28606	4.55527	3.61888	5.63615	4.00053	5.53806	0.185767	5.67737	0.0634321	1.23674	3.74023	5.18868	0.259599	4.29948	4.07157	4.20574	4.9846	3.97009	4.55337	3.6911	3.0561	5.58662	4.81393	4.24595	3.71789	2.78852	4.6936	4.47931	4.20276	5.30551	5.03901	0.70123	3.89599	4.20454	2.96966	4.14508	3.98658	2.43308	4.26863	3.48998	5.66355	3.98452
	Panx2	1.05406	0.806696	1.12747	0.0159627	0.441218	0.0399236	0	0.229131	0	0.662393	1.72842	1.12266	0	0	0.0872626	0	2.87249	0	0.876127	1.50828	1.11776	1.13514	2.18591	0	0	1.1675	0	1.88662	0.96862	1.12672	0.484791	0.851387	0.431111	0.961894	1.40451	0.238934	0.536757	0.679722	1.66896	0.0444507	1.26971	2.82859	2.63467	0.716388	0.543578	0.832351
	Panx3	0	0	0	0	0	0	0	0	0	0	0	0	0	0	0	0	0	0	0	0	0	0	0	0	0	0	0	0	0	0	0	0	0	0	0	0	0	0	0	0	0	0	0	0	0	0
	Tpcn1	0	0	0.12754	0.0213378	0.0214441	0	0	0	0.194054	0	0.367914	0	0.00934209	0	0.0238952	0	0	0.358421	0.0108668	0	1.19993	0	0	0	0	0.0110036	0.0722284	0	0	0.0292682	0	0.17657	0	0	0	0.144745	0.19814	0	0.125269	0.0446441	0	0.0111273	1.08878	0.0769765	0	0.0958556
	Tpcn2	0	0	0	0	0	0	0	0	0	0	0	0	0	0	0	0	0	0	0	0	0	0	0	0	0	0	0	0	0	0	0	0	0	0	0	0	0.566481	0	0	0	0	0	0	0	0	0.0125885
	Ano6	4.66467	0.114448	3.33221	5.31549	5.2803	0.144717	2.79499	0.773105	2.06995	0.0787054	4.11487	2.74774	5.60972	0.61158	0.54156	3.14743	3.45992	0.251612	4.16757	4.79065	5.06442	0	0.32402	0.197201	4.0848	1.8349	4.73494	0	3.69085	3.2086	3.39401	4.43462	0.728522	2.64418	3.44008	3.40327	3.77085	3.10846	0.301445	2.93269	1.82925	3.31897	1.625	2.21416	3.57671	2.6194

## Sheet: Figure 2 B iii
	mean	SEM	N
Panx1	3.98452	0.222015	45
Trpv2	3.49303	0.233642	45
Nalcn	3.43873	0.253963	45
Trpc6	3.3072	0.371962	45
Hcn3	3.22665	0.288006	45
Hcn2	2.29484	0.253866	45
Trpm7	1.22701	0.141799	45
Trpc1	1.21622	0.214803	45

## Sheet: Figure 2 C
					NAc c-VTA								NAc m-VTA										NAc l-VTA												BLA-VTA									Mpfc-VTA
		c1	c2	c3	c4	c5	c6	c7	m1	m2	m3	m4	m5	m6	m7	m8	l1	l2	l3	l4	l5	l6	l7	l8	l9	l10	l11	l12	l13	b1	b2	b3	b4	b5	b6	b7	b8	b9	b10	p1	p2	p3	p4	p5	p6	p7	mean
	Panx1	5.48187	4.80568	5.45379	5.11183	5.28606	4.55527	3.61888	5.63615	4.00053	5.53806	0.185767	5.67737	0.0634321	1.23674	3.74023	5.18868	0.259599	4.29948	4.07157	4.20574	4.9846	3.97009	4.55337	3.6911	3.0561	5.58662	4.81393	4.24595	3.71789	2.78852	4.6936	4.47931	4.20276	5.30551	5.03901	0.70123	3.89599	4.20454	2.96966	4.14508	3.98658	2.43308	4.26863	3.48998	5.66355	3.98452
	Trpv2	3.37302	5.96989	4.84061	4.87603	0.407722	3.79409	4.62395	3.43818	4.86266	3.07939	0.209703	4.17919	0	3.43223	2.77441	0.458061	4.23186	4.24515	3.77391	3.77268	4.37413	4.35978	3.37601	0.179834	4.8248	3.118	4.08047	4.98019	4.60062	4.7394	4.4024	5.0043	4.44126	0.0455062	3.493	0.396912	4.08722	3.55205	1.98966	4.18693	4.22909	4.07977	4.37455	4.38882	3.53876	3.49303
	Nalcn	0.153714	0.61519	3.89171	4.38564	3.18787	4.29927	0.0462749	5.03368	4.37598	4.82971	0.155346	4.92376	0	3.72242	3.94404	4.65243	5.87079	5.9496	6.14412	4.81355	3.72916	1.02973	4.25759	5.33698	2.43641	2.86412	4.20215	4.0476	4.47267	4.90316	4.64647	4.2247	3.00601	4.65599	0.152134	0.681735	3.64683	4.16375	3.0108	4.10795	2.38615	3.69398	2.33066	2.67351	3.08754	3.43873
	Trpc6	5.81399	6.74171	5.48519	5.86992	0.291209	6.22911	4.01057	1.5614	4.67256	5.0367	0.366583	1.50194	6.36687	5.3206	1.50901	3.02324	0.288463	5.79047	4.64052	5.27504	6.19085	5.80414	5.36707	5.44992	6.62435	5.20154	5.43863	6.14626	3.54481	4.35578	0.432505	5.46235	0.61018	0.0282088	3.85238	0.0321471	0.178825	0	0	0	0.0784312	0.0625406	1.57382	1.85651	0.737762	3.3072
	Hcn3	4.71388	0.198118	4.7448	4.4642	0.197686	3.14277	0.827655	3.93732	4.3174	0.192578	5.72606	0.0672726	0	0.0462848	3.63203	0.350466	5.66128	5.16172	4.80815	3.70722	4.72228	2.88237	4.16675	5.15767	3.53568	1.0453	3.64686	0.0400104	5.2054	4.72973	3.04599	3.72976	4.41899	3.72273	0.590509	0.0523787	2.9521	3.5076	4.68885	5.2066	4.44853	3.3087	4.07348	4.22105	6.20289	3.22665
	Hcn2	2.46174	3.81934	4.2062	5.13424	2.32533	0	0.0751036	0.163722	2.78427	4.51161	1.23344	0.105831	4.0768	0.115237	4.83871	0.958006	3.13089	4.99362	4.56971	3.44279	3.12994	3.59397	3.8797	0.2045	2.92599	0	3.82939	1.85552	3.85136	0	2.31085	0.879026	4.15502	3.46243	0.0200975	0	3.91267	0.889766	2.23181	2.47646	0.751834	2.67611	0.688523	0.0912567	2.50483	2.29484
	Trpm7	0.968642	1.40998	0.0348536	0.841932	0	2.50649	2.86319	0.847655	1.57986	0.0176725	2.59375	1.25738	0.688651	0.337729	0.00636028	3.07766	0.0721174	0.119542	0	2.61694	0.255433	0.0224759	1.38488	1.09753	0.779532	1.80876	1.38835	2.38884	2.03288	3.0115	1.56436	0.844251	1.19284	1.60548	0.6238	0.390793	2.72263	0.938523	1.44086	3.03071	0.544633	0.399962	0.924868	1.68723	1.29381	1.22701
	Trpc1	1.40801	3.16529	3.23994	0.0492381	3.49598	0.0250405	3.00336	0.0424094	1.24015	0.0762403	0.0684444	0	0	0.0133369	0.0332908	5.2839	0.00763916	0.0393663	2.10799	3.18977	2.43897	1.53442	2.76222	0.0363594	0	2.60392	0.0378445	0.0342782	2.93658	0.0362817	3.50162	0.0924406	1.71977	0	0	0	2.17375	0.0240599	1.62411	0.0278962	0.0208458	0	1.31132	2.30011	3.02352	1.21622
