# Supplementary material for: The cation channel mechanisms of subthreshold inward depolarizing currents in the mice VTA dopaminergic neurons and their roles in the chronic-stress-induced depression-like behavior
Source: eLife. 2024 Dec 6;12:RP88319. doi: 10.7554/eLife.88319 (PMC11623934; doi:10.7554/eLife.88319)
Supplement: Figure 3—source data 4. [file elife-88319-fig3-data4.xlsx]

## Sheet: Figure 3 C i
Time-course
Time(ms)	RMP(mv)
0	-49.2706
2.6	-49.2554
5.2	-49.1486
7.8	-49.0936
10.4	-49.0143
13	-48.9746
15.6	-48.9868
18.2	-48.7762
20.8	-48.7396
23.4	-48.6054
26	-48.4833
28.6	-48.4558
31.2	-48.3643
33.8	-48.3398
36.4	-48.2483
39	-48.1964
41.6	-48.2208
44.2	-48.0377
46.8	-47.9828
49.4	-47.9767
52	-47.8485
54.6	-47.8485
57.2	-47.7417
59.8	-47.7875
62.4	-47.7326
65	-47.6166
67.6	-47.5922
70.2	-47.4701
72.8	-47.4854
75.4	-47.58
78	-47.583
80.6	-47.641
83.2	-47.5067
85.8	-47.4823
88.4	-47.5098
91	-47.4182
93.6	-47.5555
96.2	-47.4915
98.8	-47.3633
101.4	-47.3389
104	-47.2137
106.6	-47.1985
109.2	-47.0947
111.8	-46.9483
114.4	-47.0856
117	-47.1039
119.6	-47.2382
122.2	-47.1832
124.8	-46.8811
127.4	-46.7712
130	-46.6644
132.6	-46.521
135.2	-46.3379
137.8	-46.2525
140.4	-46.2158
143	-46.2311
145.6	-46.2982
148.2	-46.283
150.8	-46.2006
153.4	-46.1487
156	-46.0632
158.6	-45.9503
161.2	-45.9503
163.8	-45.7642
166.4	-45.6726
169	-45.5688
171.6	-45.5048
174.2	-45.6421
176.8	-45.6787
179.4	-45.2484
182	-45.282
184.6	-45.0684
187.2	-45.0653
189.8	-45.0623
192.4	-45.0836
195	-45.282
197.6	-45.2759
200.2	-45.2789
202.8	-45.1721
205.4	-45.05
208	-45.0836
210.6	-44.9249
213.2	-44.8334
215.8	-44.7906
218.4	-44.7876
221	-44.928
223.6	-44.8547
226.2	-44.7266
228.8	-44.5923
231.4	-44.3268
234	-44.3298
236.6	-44.3146
239.2	-44.3054
241.8	-44.3146
244.4	-44.2627
247	-44.2383
249.6	-44.1284
252.2	-44.0247
254.8	-44.0827
257.4	-43.9941
260	-44.0949
262.6	-44.0491
265.2	-43.9697
267.8	-44.0125
270.4	-43.9239
273	-43.5242
275.6	-43.3167
278.2	-43.2709
280.8	-43.3807
283.4	-43.3594
286	-43.338
288.6	-43.3045
291.2	-43.1793
293.8	-43.3045
296.4	-43.3167
299	-43.3105
301.6	-43.3838
304.2	-43.2556
306.8	-43.3746
309.4	-43.4296
312	-43.396
314.6	-43.4387
317.2	-43.2831
319.8	-43.158
322.4	-43.1335
325	-42.9718
327.6	-42.8742
330.2	-42.7856
332.8	-42.5629
335.4	-42.4225
338	-42.2943
340.6	-42.0288
343.2	-41.8762
345.8	-41.9586
348.4	-42.0166
351	-41.9708
353.6	-41.9678
356.2	-41.8457
358.8	-41.7694
361.4	-41.684
364	-41.5833
366.6	-41.5314
369.2	-41.7389
371.8	-41.8304
374.4	-42.0227
377	-42.0593
379.6	-42.0868
382.2	-42.1844
384.8	-42.2333
387.4	-42.2638
390	-42.2943
392.6	-42.3157
395.2	-42.3676
397.8	-42.3157
400.4	-42.3309
403	-42.4072
405.6	-42.4469
408.2	-42.3889
410.8	-42.3309
413.4	-42.3981
416	-42.3431
418.6	-42.4438
421.2	-42.5354
423.8	-42.4957
426.4	-42.5202
429	-42.5842
431.6	-42.6148
434.2	-42.691
436.8	-42.7002
439.4	-42.5781
442	-42.5751
444.6	-42.3431
447.2	-42.4347
449.8	-42.4378
452.4	-42.3492
455	-42.2913
457.6	-42.2028
460.2	-42.1417
462.8	-42.0288
465.4	-41.9525
468	-41.9037
470.6	-41.7847
473.2	-41.8243
475.8	-41.8121
478.4	-41.7725
481	-41.861
483.6	-41.7725
486.2	-41.7999
488.8	-41.7786
491.4	-41.7175
494	-41.7084
496.6	-41.7572
499.2	-41.8518
501.8	-41.5772
504.4	-41.4764
507	-41.5314
509.6	-41.452
512.2	-41.3879
514.8	-41.3879
517.4	-41.33
520	-41.3727
522.6	-41.2567
525.2	-41.0797
527.8	-41.214
530.4	-41.3086
533	-41.4856
535.6	-41.4612
538.2	-41.3513
540.8	-41.1163
543.4	-40.863
546	-40.6677
548.6	-40.3931
551.2	-39.975
553.8	-39.7034
556.4	-39.5691
559	-39.5325
561.6	-39.6057
564.2	-39.6088
566.8	-39.7217
569.4	-39.7278
572	-39.7186
574.6	-40.0238
577.2	-40.0604
579.8	-40.1886
582.4	-40.1886
585	-40.1459
587.6	-40.1795
590.2	-40.2069
592.8	-40.2771
595.4	-40.3137
598	-40.1795
600.6	-40.1215
603.2	-39.9811
605.8	-39.8316
608.4	-39.6759
611	-39.4928
613.6	-39.563
616.2	-39.6393
618.8	-39.7583
621.4	-39.9719
624	-39.9078
626.6	-39.9231
629.2	-39.9567
631.8	-40.0238
634.4	-40.3259
637	-40.3473
639.6	-40.3015
642.2	-40.1459
644.8	-39.8712
647.4	-39.7797
650	-39.6759
652.6	-39.7675
655.2	-39.6881
657.8	-39.5538
660.4	-39.6118
663	-39.5599
665.6	-39.4806
668.2	-39.4104
670.8	-39.1541
673.4	-39.0106
676	-38.9832
678.6	-38.9252
681.2	-38.8733
683.8	-38.6322
686.4	-38.443
689	-38.1744
691.6	-37.8479
694.2	-37.6221
696.8	-37.4054
699.4	-37.4176
702	-37.6099
704.6	-37.6282
707.2	-37.735
709.8	-37.7106
712.4	-37.7319
715	-37.738
717.6	-37.7594
720.2	-37.9639
722.8	-38.1317
725.4	-38.15
728	-38.1897
730.6	-38.028
733.2	-37.9273
735.8	-37.6221
738.4	-37.5275
741	-37.5488
743.6	-37.3077
746.2	-37.1765
748.8	-37.2131
751.4	-37.207
754	-37.2253
756.6	-37.1002
759.2	-37.1735
761.8	-37.2925
764.4	-37.2467
767	-37.3261
769.6	-37.3474
772.2	-37.4207
774.8	-37.5549
777.4	-37.5244
780	-37.5763
782.6	-37.8357
785.2	-37.9059
787.8	-37.8479
790.4	-37.8296
793	-37.9547
795.6	-37.9547
798.2	-37.9608
800.8	-37.9608
803.4	-37.9517
806	-38.0432
808.6	-38.0768
811.2	-38.1256
813.8	-38.3423
816.4	-38.208
819	-38.147
821.6	-38.324
824.2	-38.2507
826.8	-38.2355
829.4	-38.0249
832	-37.9211
834.6	-37.8601
837.2	-37.7655
839.8	-37.6404
842.4	-37.6373
845	-37.6587
847.6	-37.5519
850.2	-37.4298
852.8	-37.5549
855.4	-37.7533
858	-37.7258
860.6	-37.854
863.2	-37.8662
865.8	-37.9242
868.4	-37.9364
871	-37.793
873.6	-37.8387
876.2	-37.9425
878.8	-38.0005
881.4	-38.2629
884	-38.2996
886.6	-38.3972
889.2	-38.4979
891.8	-38.3453
894.4	-38.2874
897	-38.1073
899.6	-37.9547
902.2	-37.8998
904.8	-37.8387
907.4	-37.915
910	-37.7747
912.6	-37.7625
915.2	-37.8052
917.8	-37.8021
920.4	-37.7136
923	-37.5397
925.6	-37.3932
928.2	-37.2772
930.8	-37.1246
933.4	-37.1002
936	-37.146
938.6	-37.2589
941.2	-37.5336
943.8	-37.5549
946.4	-37.5366
949	-37.5916
951.6	-37.5519
954.2	-37.5916
956.8	-37.4634
959.4	-37.4115
962	-37.3352
964.6	-37.0789
967.2	-37.1002
969.8	-36.9446
972.4	-37.0331
975	-36.8103
977.6	-36.673
980.2	-36.7828
982.8	-36.9446
985.4	-36.9141
988	-36.911
990.6	-36.6974
993.2	-36.7371
995.8	-36.6089
998.4	-36.4624
1001	-36.4349
1003.6	-36.2579
1006.2	-36.0809
1008.8	-35.9406
1011.4	-35.8398
1014	-35.7758
1016.6	-35.5957
1019.2	-35.5408
1021.8	-35.4065
1024.4	-35.202
1027	-35.1593
1029.6	-35.0464
1032.2	-34.9945
1034.8	-35.083
1037.4	-35.1227
1040	-35.2203
1042.6	-35.3516
1045.2	-35.2234
1047.8	-35.1715
1050.4	-35.0159
1053	-35.0677
1055.6	-34.9823
1058.2	-34.8389
1060.8	-35.1166
1063.4	-35.315
1066	-35.4797
1068.6	-35.4553
1071.2	-35.3699
1073.8	-35.4431
1076.4	-35.3821
1079	-35.4553
1081.6	-35.7727
1084.2	-35.8765
1086.8	-35.9711
1089.4	-36.0474
1092	-36.2824
1094.6	-36.7706
1097.2	-36.8927
1099.8	-37.0789
1102.4	-37.2528
1105	-37.1857
1107.6	-37.2009
1110.2	-37.2375
1112.8	-37.3291
1115.4	-37.3718
1118	-37.3993
1120.6	-37.5214
1123.2	-37.3688
1125.8	-37.262
1128.4	-36.9995
1131	-36.4075
1133.6	-36.1664
1136.2	-36.0718
1138.8	-36.142
1141.4	-36.2305
1144	-35.9863
1146.6	-36.0199
1149.2	-36.0321
1151.8	-36.0992
1154.4	-36.5692
1157	-36.7645
1159.6	-37.1033
1162.2	-37.2284
1164.8	-37.0483
1167.4	-37.2467
1170	-37.2803
1172.6	-37.4451
1175.2	-37.5977
1177.8	-37.6923
1180.4	-37.7563
1183	-37.6068
1185.6	-37.5153
1188.2	-37.5397
1190.8	-37.5275
1193.4	-37.6526
1196	-37.5916
1198.6	-37.5885
1201.2	-37.5519
1203.8	-37.3383
1206.4	-37.3169
1209	-37.3169
1211.6	-37.2131
1214.2	-37.2253
1216.8	-37.0819
1219.4	-37.2467
1222	-37.3352
1224.6	-37.265
1227.2	-37.2315
1229.8	-37.2162
1232.4	-37.0514
1235	-37.0361
1237.6	-36.8164
1240.2	-36.5051
1242.8	-36.2427
1245.4	-36.084
1248	-35.9344
1250.6	-35.7361
1253.2	-35.7025
1255.8	-35.6812
1258.4	-35.7452
1261	-35.73
1263.6	-35.675
1266.2	-35.6506
1268.8	-35.6476
1271.4	-35.6262
1274	-35.7849
1276.6	-35.8063
1279.2	-35.907
1281.8	-36.0168
1284.4	-36.0199
1287	-36.1511
1289.6	-36.2946
1292.2	-36.2518
1294.8	-36.1206
1297.4	-36.0108
1300	-36.0474
1302.6	-36.1206
1305.2	-36.1542
1307.8	-36.4777
1310.4	-36.6028
1313	-36.5906
1315.6	-36.38
1318.2	-36.3831
1320.8	-36.261
1323.4	-36.0291
1326	-35.9985
1328.6	-35.8124
1331.2	-35.6079
1333.8	-35.6079
1336.4	-35.5591
1339	-35.437
1341.6	-35.3912
1344.2	-35.2326
1346.8	-35.315
1349.4	-35.3546
1352	-35.379
1354.6	-35.5774
1357.2	-35.5133
1359.8	-35.6049
1362.4	-35.5286
1365	-35.5194
1367.6	-35.4523
1370.2	-35.3607
1372.8	-35.2539
1375.4	-34.9518
1378	-34.8572
1380.6	-34.7626
1383.2	-34.6039
1385.8	-34.6954
1388.4	-34.5398
1391	-34.1156
1393.6	-33.9417
1396.2	-33.7921
1398.8	-33.6914
1401.4	-33.5236
1404	-33.4229
1406.6	-33.2489
1409.2	-33.2855
1411.8	-33.2489
1414.4	-33.3222
1417	-33.4106
1419.6	-33.6578
1422.2	-33.6975
1424.8	-33.7311
1427.4	-33.96
1430	-34.0332
1432.6	-34.1553
1435.2	-34.1889
1437.8	-34.3079
1440.4	-34.6985
1443	-34.9518
1445.6	-35.2814
1448.2	-35.5591
1450.8	-35.672
1453.4	-35.8917
1456	-35.9314
1458.6	-36.0626
1461.2	-36.203
1463.8	-36.0108
1466.4	-35.9009
1469	-35.9161
1471.6	-35.5621
1474.2	-35.5804
1476.8	-35.5011
1479.4	-35.5194
1482	-35.6232
1484.6	-35.6201
1487.2	-35.6049
1489.8	-35.5133
1492.4	-35.5194
1495	-35.3546
1497.6	-35.2844
1500.2	-35.3241
1502.8	-35.3516
1505.4	-35.4462
1508	-35.6781
1510.6	-35.7391
1513.2	-36.023
1515.8	-36.2824
1518.4	-36.3434
1521	-36.3586
1523.6	-36.2427
1526.2	-36.2061
1528.8	-36.1145
1531.4	-35.907
1534	-35.6415
1536.6	-35.3394
1539.2	-35.2875
1541.8	-35.3333
1544.4	-35.141
1547	-34.8145
1549.6	-34.8328
1552.2	-34.7839
1554.8	-34.848
1557.4	-34.8419
1560	-34.903
1562.6	-34.8175
1565.2	-34.903
1567.8	-34.9854
1570.4	-34.8297
1573	-34.7015
1575.6	-34.8175
1578.2	-34.964
1580.8	-35.0586
1583.4	-35.1929
1586	-35.376
1588.6	-35.4004
1591.2	-35.3699
1593.8	-35.5225
1596.4	-35.6354
1599	-35.4401
1601.6	-35.2081
1604.2	-34.6039
1606.8	-34.2163
1609.4	-34.0057
1612	-33.7402
1614.6	-33.8867
1617.2	-34.1644
1619.8	-34.6863
1622.4	-34.9976
1625	-35.4218
1627.6	-35.6964
1630.2	-35.8429
1632.8	-36.0504
1635.4	-36.2518
1638	-36.319
1640.6	-36.4288
1643.2	-36.3556
1645.8	-36.4044
1648.4	-36.2854
1651	-36.1359
1653.6	-36.1816
1656.2	-36.2274
1658.8	-36.3464
1661.4	-36.5936
1664	-36.5448
1666.6	-36.618
1669.2	-36.5814
1671.8	-36.557
1674.4	-36.6638
1677	-36.5082
1679.6	-36.2488
1682.2	-36.087
1684.8	-35.8154
1687.4	-35.7819
1690	-35.6171
1692.6	-35.6537
1695.2	-35.8978
1697.8	-35.553
1700.4	-35.4126
1703	-35.376
1705.6	-35.2997
1708.2	-35.3333
1710.8	-35.2692
1713.4	-35.376
1716	-35.4156
1718.6	-35.4675
1721.2	-35.4156
1723.8	-35.1471
1726.4	-35.2448
1729	-35.5255
1731.6	-35.6873
1734.2	-36.0718
1736.8	-36.3098
1739.4	-36.4899
1742	-36.5326
1744.6	-36.5234
1747.2	-36.4807
1749.8	-36.4563
1752.4	-36.615
1755	-36.676
1757.6	-36.5814
1760.2	-36.6119
1762.8	-36.7218
1765.4	-36.9263
1768	-37.0697
1770.6	-37.1155
1773.2	-37.2833
1775.8	-37.5244
1778.4	-37.7289
1781	-37.9303
1783.6	-38.1683
1786.2	-38.1867
1788.8	-38.2477
1791.4	-38.2996
1794	-38.5895
1796.6	-38.6017
1799.2	-38.5834
1801.8	-38.6719
1804.4	-38.5101
1807	-38.3881
1809.6	-38.4247
1812.2	-38.4735
1814.8	-38.5956
1817.4	-38.6658
1820	-38.7085
1822.6	-38.8458
1825.2	-39.0534
1827.8	-39.1693
1830.4	-39.1113
1833	-39.1968
1835.6	-39.1113
1838.2	-39.0106
1840.8	-39.148
1843.4	-39.1266
1846	-39.1968
1848.6	-39.2029
1851.2	-38.9832
1853.8	-38.9984
1856.4	-38.8489
1859	-38.9435
1861.6	-38.971
1864.2	-38.8245
1866.8	-38.9069
1869.4	-38.8275
1872	-38.8245
1874.6	-38.8306
1877.2	-38.7329
1879.8	-38.6139
1882.4	-38.4216
1885	-38.15
1887.6	-37.9089
1890.2	-37.5641
1892.8	-37.3779
1895.4	-37.3291
1898	-36.969
1900.6	-36.7371
1903.2	-36.4838
1905.8	-36.38
1908.4	-36.1969
1911	-36.0382
1913.6	-36.0596
1916.2	-35.733
1918.8	-35.611
1921.4	-35.614
1924	-35.3638
1926.6	-35.2966
1929.2	-35.2966
1931.8	-35.2509
1934.4	-35.437
1937	-35.5499
1939.6	-35.788
1942.2	-35.9772
1944.8	-35.733
1947.4	-35.6232
1950	-35.3912
1952.6	-35.2783
1955.2	-35.2356
1957.8	-35.0067
1960.4	-35.083
1963	-35.0342
1965.6	-34.8877
1968.2	-34.8419
1970.8	-34.7412
1973.4	-35.2539
1976	-35.2997
1978.6	-35.495
1981.2	-35.7208
1983.8	-35.7269
1986.4	-35.791
1989	-35.7361
1991.6	-35.4889
1994.2	-35.2844
1996.8	-35.2509
1999.4	-35.1959
2002	-35.0464
2004.6	-34.8419
2007.2	-34.8938
2009.8	-34.8847
2012.4	-34.7778
2015	-34.8633
2017.6	-34.7809
2020.2	-34.8694
2022.8	-34.9426
2025.4	-35.0189
2028	-34.9548
2030.6	-34.8267
2033.2	-34.7412
2035.8	-34.5489
2038.4	-34.5184
2041	-34.7687
2043.6	-34.7534
2046.2	-34.8389
2048.8	-34.8511
2051.4	-34.6283
2054	-34.7199
2056.6	-34.8511
2059.2	-34.9426
2061.8	-35.0403
2064.4	-35.1105
2067	-35.0861
2069.6	-35.0281
2072.2	-34.903
2074.8	-35.1044
2077.4	-35.1929
2080	-35.2386
2082.6	-35.4156
2085.2	-35.6476
2087.8	-35.6964
2090.4	-35.6049
2093	-35.6842
2095.6	-35.5316
2098.2	-35.5072
2100.8	-35.4034
2103.4	-34.9182
2106	-34.61
2108.6	-34.4513
2111.2	-34.1858
2113.8	-34.0332
2116.4	-33.7799
2119	-33.4595
2121.6	-33.197
2124.2	-33.0872
2126.8	-33.0353
2129.4	-32.9163
2132	-32.9895
2134.6	-33.197
2137.2	-32.7789
2139.8	-32.8186
2142.4	-32.7515
2145	-32.6324
2147.6	-32.7698
2150.2	-32.6324
2152.8	-32.663
2155.4	-32.7881
2158	-33.2764
2160.6	-33.5052
2163.2	-33.6395
2165.8	-33.6639
2168.4	-33.4717
2171	-33.5602
2173.6	-33.8135
2176.2	-33.8776
2178.8	-33.9905
2181.4	-33.9844
2184	-33.609
2186.6	-33.5663
2189.2	-33.3008
2191.8	-32.9102
2194.4	-32.7454
2197	-32.4707
2199.6	-32.2205
2202.2	-32.1442
2204.8	-32.2876
2207.4	-32.2296
2210	-32.0831
2212.6	-32.074
2215.2	-32.0557
2217.8	-32.2144
2220.4	-32.3517
2223	-32.373
2225.6	-32.5806
2228.2	-32.84
2230.8	-32.9376
2233.4	-33.0505
2236	-32.9712
2238.6	-33.2886
2241.2	-33.5632
2243.8	-33.9081
2246.4	-34.4727
2249	-34.79
2251.6	-34.9091
2254.2	-35.2264
2256.8	-35.4462
2259.4	-35.6323
2262	-35.7025
2264.6	-35.8246
2267.2	-36.1023
2269.8	-36.2579
2272.4	-36.5723
2275	-36.7767
2277.6	-36.7889
2280.2	-36.9598
2282.8	-37.03
2285.4	-37.1979
2288	-37.3901
2290.6	-37.4573
2293.2	-37.8906
2295.8	-38.2202
2298.4	-38.3026
2301	-38.3759
2303.6	-38.2599
2306.2	-38.1927
2308.8	-38.2446
2311.4	-38.3087
2314	-38.4155
2316.6	-38.2904
2319.2	-38.2904
2321.8	-38.2355
2324.4	-38.1378
2327	-38.1531
2329.6	-37.9913
2332.2	-38.0981
2334.8	-38.0768
2337.4	-37.8723
2340	-37.7777
2342.6	-37.6648
2345.2	-37.7014
2347.8	-37.7045
2350.4	-37.5153
2353	-37.4878
2355.6	-37.4542
2358.2	-37.4329
2360.8	-37.5855
2363.4	-37.4725
2366	-37.6129
2368.6	-37.7228
2371.2	-37.6679
2373.8	-37.7197
2376.4	-37.6679
2379	-37.619
2381.6	-37.4237
2384.2	-37.3016
2386.8	-37.3322
2389.4	-37.1613
2392	-37.2009
2394.6	-37.3169
2397.2	-37.4268
2399.8	-37.5458
2402.4	-37.616
2405	-37.6404
2407.6	-37.5122
2410.2	-37.4237
2412.8	-37.4085
2415.4	-37.3627
2418	-37.1521
2420.6	-37.4207
2423.2	-37.4634
2425.8	-37.4939
2428.4	-37.561
2431	-37.6068
2433.6	-37.6282
2436.2	-37.7167
2438.8	-37.8601
2441.4	-37.9944
2444	-37.9517
2446.6	-38.0035
2449.2	-38.0188
2451.8	-37.9273
2454.4	-37.9456
2457	-37.9578
2459.6	-37.9578
2462.2	-37.9791
2464.8	-37.8571
2467.4	-37.8479
2470	-37.6709
2472.6	-37.6343
2475.2	-37.6953
2477.8	-37.4909
2480.4	-37.4298
2483	-37.3169
2485.6	-37.0911
2488.2	-37.1399
2490.8	-37.03
2493.4	-37.1552
2496	-37.0789
2498.6	-37.0605
2501.2	-37.1918
2503.8	-37.088
2506.4	-37.204
2509	-37.2284
2511.6	-37.1491
2514.2	-37.323
2516.8	-37.3077
2519.4	-37.439
2522	-37.5458
2524.6	-37.5641
2527.2	-37.8449
2529.8	-37.8204
2532.4	-37.7777
2535	-37.7563
2537.6	-37.6434
2540.2	-37.6709
2542.8	-37.6495
2545.4	-37.7411
2548	-37.8815
2550.6	-37.7869
2553.2	-37.6587
2555.8	-37.561
2558.4	-37.3566
2561	-37.2131
2563.6	-37.0178
2566.2	-36.8866
2568.8	-37.1002
2571.4	-37.1307
2574	-37.3352
2576.6	-37.5366
2579.2	-37.6617
2581.8	-37.3749
2584.4	-37.2528
2587	-37.1887
2589.6	-37.3535
2592.2	-37.3322
2594.8	-37.3383
2597.4	-37.3199
2600	-37.4725
2602.6	-37.5763
2605.2	-37.5519
2607.8	-37.3322
2610.4	-37.0819
2613	-37.1521
2615.6	-37.1491
2618.2	-37.0789
2620.8	-37.1002
2623.4	-36.9598
2626	-36.969
2628.6	-36.8225
2631.2	-36.5509
2633.8	-36.3953
2636.4	-35.8826
2639	-35.6201
2641.6	-35.6476
2644.2	-35.5713
2646.8	-35.6018
2649.4	-35.553
2652	-35.5804
2654.6	-35.5652
2657.2	-35.6598
2659.8	-35.8948
2662.4	-35.8429
2665	-35.9985
2667.6	-36.0779
2670.2	-36.3007
2672.8	-36.5326
2675.4	-36.7004
2678	-36.7035
2680.6	-37.0087
2683.2	-37.2192
2685.8	-37.3169
2688.4	-37.439
2691	-37.4909
2693.6	-37.735
2696.2	-37.7655
2698.8	-37.8479
2701.4	-37.8906
2704	-37.7747
2706.6	-37.738
2709.2	-37.4542
2711.8	-37.1765
2714.4	-37.1735
2717	-36.8897
2719.6	-36.554
2722.2	-36.3678
2724.8	-36.3098
2727.4	-36.2946
2730	-36.1023
2732.6	-36.2335
2735.2	-36.2946
2737.8	-36.438
2740.4	-36.5509
2743	-36.5997
2745.6	-36.9202
2748.2	-37.1124
2750.8	-36.8622
2753.4	-36.8256
2756	-36.7126
2758.6	-36.676
2761.2	-36.676
2763.8	-36.3037
2766.4	-36.2793
2769	-36.1816
2771.6	-36.0535
2774.2	-36.0321
2776.8	-35.9497
2779.4	-35.8429
2782	-35.6537
2784.6	-35.4218
2787.2	-35.3485
2789.8	-35.0769
2792.4	-34.8206
2795	-34.7412
2797.6	-34.4238
2800.2	-34.1248
2802.8	-33.7036
2805.4	-33.4564
2808	-33.2672
2810.6	-33.1543
2813.2	-33.316
2815.8	-33.429
2818.4	-33.5358
2821	-34.0363
2823.6	-33.9447
2826.2	-34.137
2828.8	-34.3628
2831.4	-34.3384
2834	-34.5612
2836.6	-34.5642
2839.2	-34.8175
2841.8	-35.1166
2844.4	-35.2539
2847	-35.3882
2849.6	-35.5713
2852.2	-35.6323
2854.8	-35.7758
2857.4	-35.9375
2860	-36.2183
2862.6	-36.4716
2865.2	-36.5082
2867.8	-36.7432
2870.4	-36.8134
2873	-36.9202
2875.6	-36.9781
2878.2	-37.0392
2880.8	-37.1826
2883.4	-37.0545
2886	-37.0575
2888.6	-37.1277
2891.2	-37.2375
2893.8	-37.4695
2896.4	-37.5366
2899	-37.5214
2901.6	-37.6556
2904.2	-37.7838
2906.8	-37.8998
2909.4	-37.9242
2912	-37.9303
2914.6	-37.8418
2917.2	-37.6831
2919.8	-37.561
2922.4	-37.3962
2925	-37.2925
2927.6	-37.2192
2930.2	-37.0789
2932.8	-37.1491
2935.4	-37.2009
2938	-37.0453
2940.6	-37.1643
2943.2	-37.2131
2945.8	-37.2131
2948.4	-37.265
2951	-37.2559
2953.6	-37.3047
2956.2	-37.2528
2958.8	-37.1704
2961.4	-37.0178
2964	-36.9568
2966.6	-36.9171
2969.2	-36.9476
2971.8	-37.0239
2974.4	-37.1918
2977	-37.1857
2979.6	-37.2009
2982.2	-37.1643
2984.8	-37.085
2987.4	-37.1429
2990	-37.0728
2992.6	-37.1124
2995.2	-37.2192
2997.8	-37.2131
3000.4	-37.1765
3003	-37.3016
3005.6	-37.4237
3008.2	-37.4786
3010.8	-37.4573
3013.4	-37.4939
3016	-37.3505
3018.6	-37.2925
3021.2	-37.2803
3023.8	-37.2009
3026.4	-37.2742
3029	-37.3657
3031.6	-37.4603
3034.2	-37.7045
3036.8	-37.7197
3039.4	-37.738
3042	-37.8113
3044.6	-37.8082
3047.2	-37.8174
3049.8	-37.6709
3052.4	-37.561
3055	-37.4695
3057.6	-37.2223
3060.2	-37.2253
3062.8	-37.1063
3065.4	-37.1521
3068	-37.3108
3070.6	-37.3535
3073.2	-37.4878
3075.8	-37.3139
3078.4	-37.146
3081	-37.1735
3083.6	-36.9659
3086.2	-36.8683
3088.8	-36.7004
3091.4	-36.5631
3094	-36.554
3096.6	-36.6516
3099.2	-36.7462
3101.8	-36.8011
3104.4	-36.7188
3107	-36.6882
3109.6	-36.6882
3112.2	-36.7889
3114.8	-36.9202
3117.4	-36.9293
3120	-37.1429
3122.6	-37.4512
3125.2	-37.7136
3127.8	-37.8265
3130.4	-37.7991
3133	-37.8876
3135.6	-37.7594
3138.2	-37.6526
3140.8	-37.5793
3143.4	-37.381
3146	-37.3413
3148.6	-37.3627
3151.2	-37.3322
3153.8	-37.0392
3156.4	-36.8835
3159	-36.792
3161.6	-36.9598
3164.2	-37.2101
3166.8	-37.3139
3169.4	-37.3444
3172	-37.4817
3174.6	-37.6007
3177.2	-37.5824
3179.8	-37.6617
3182.4	-37.561
3185	-37.5092
3187.6	-37.4481
3190.2	-37.1857
3192.8	-37.1796
3195.4	-37.0575
3198	-36.9171
3200.6	-36.7462
3203.2	-36.4502
3205.8	-36.3861
3208.4	-36.2183
3211	-36.142
3213.6	-36.0168
3216.2	-35.7178
3218.8	-35.5011
3221.4	-35.3241
3224	-34.8663
3226.6	-34.5825
3229.2	-34.6313
3231.8	-34.6588
3234.4	-34.436
3237	-34.2743
3239.6	-34.2468
3242.2	-34.14
3244.8	-34.0576
3247.4	-33.6639
3250	-33.4015
3252.6	-33.1268
3255.2	-33.0505
3257.8	-33.0963
3260.4	-33.1116
3263	-32.8156
3265.6	-32.4768
3268.2	-32.0435
3270.8	-31.5003
3273.4	-31.0822
3276	-30.5054
3278.6	-30.4199
3281.2	-30.6549
3283.8	-30.6091
3286.4	-30.3223
3289	-29.9683
3291.6	-29.6844
3294.2	-29.4006
3296.8	-29.1107
3299.4	-28.2654
3302	-26.3214
3304.6	22.4121
3307.2	-23.3612
3309.8	-41.4734
3312.4	-44.3176
3315	-46.0571
3317.6	-47.4548
3320.2	-48.6908
3322.8	-49.5697
3325.4	-50.4242
3328	-51.123
3330.6	-51.6205
3333.2	-52.1332
3335.8	-52.417
3338.4	-52.7802
3341	-53.244
3343.6	-53.302
3346.2	-53.3753
3348.8	-53.4332
3351.4	-53.3783
3354	-53.6621
3356.6	-53.714
3359.2	-53.833
3361.8	-53.9001
3364.4	-54.0619
3367	-54.2175
3369.6	-54.2694
3372.2	-54.2938
3374.8	-54.3152
3377.4	-54.4128
3380	-54.3457
3382.6	-54.4617
3385.2	-54.4647
3387.8	-54.5807
3390.4	-54.6082
3393	-54.6722
3395.6	-54.7241
3398.2	-54.7455
3400.8	-54.7516
3403.4	-54.5929
3406	-54.5258
3408.6	-54.5471
3411.2	-54.538
3413.8	-54.5044
3416.4	-54.2725
3419	-54.2938
3421.6	-54.3549
3424.2	-54.2114
3426.8	-53.9948
3429.4	-53.7476
3432	-53.6896
3434.6	-53.5858
3437.2	-53.5614
3439.8	-53.6591
3442.4	-53.6316
3445	-53.5492
3447.6	-53.3783
3450.2	-53.2166
3452.8	-53.1433
3455.4	-53.1097
3458	-53.067
3460.6	-53.1067
3463.2	-53.009
3465.8	-52.7954
3468.4	-52.536
3471	-52.2522
3473.6	-52.2034
3476.2	-52.1973
3478.8	-52.0538
3481.4	-51.947
3484	-51.8128
3486.6	-51.6571
3489.2	-51.4252
3491.8	-51.2451
3494.4	-51.239
3497	-51.117
3499.6	-51.2238
3502.2	-51.1993
3504.8	-51.2238
3507.4	-51.2207
3510	-51.1108
3512.6	-51.1383
3515.2	-51.0834
3517.8	-51.0346
3520.4	-51.117
3523	-51.0132
3525.6	-50.9155
3528.2	-50.8148
3530.8	-50.6287
3533.4	-50.4181
3536	-50.235
3538.6	-50.1953
3541.2	-50.1831
3543.8	-50.0427
3546.4	-49.9481
3549	-49.7406
3551.6	-49.6185
3554.2	-49.5789
3556.8	-49.5178
3559.4	-49.6124
3562	-49.6216
3564.6	-49.5422
3567.2	-49.3775
3569.8	-49.1028
3572.4	-49.0753
3575	-48.9899
3577.6	-48.9014
3580.2	-48.938
3582.8	-48.7702
3585.4	-48.6298
3588	-48.4833
3590.6	-48.1842
3593.2	-48.1476
3595.8	-48.0866
3598.4	-48.0347
3601	-48.114
3603.6	-47.9187
3606.2	-47.8973
3608.8	-47.7509
3611.4	-47.6288
3614	-47.6929
3616.6	-47.6929
3619.2	-47.3999
3621.8	-47.3602
3624.4	-47.2534
3627	-47.3511
3629.6	-47.229
3632.2	-47.2168
3634.8	-47.1008
3637.4	-46.8262
3640	-46.7163
3642.6	-46.4691
3645.2	-46.3562
3647.8	-46.283
3650.4	-46.051
3653	-46.0968
3655.6	-45.9595
3658.2	-45.9381
3660.8	-46.0327
3663.4	-45.8832
3666	-45.9076
3668.6	-45.9168
3671.2	-45.6879
3673.8	-45.7275
3676.4	-45.6635
3679	-45.6543
3681.6	-45.6909
3684.2	-45.4804
3686.8	-45.4437
3689.4	-45.3583
3692	-45.3583
3694.6	-45.343
3697.2	-45.3125
3699.8	-45.3858
3702.4	-45.3674
3705	-45.3644
3707.6	-45.4468
3710.2	-45.4651
3712.8	-45.697
3715.4	-45.8008
3718	-45.8618
3720.6	-45.9961
3723.2	-45.8466
3725.8	-45.8252
3728.4	-45.8008
3731	-45.7214
3733.6	-45.8893
3736.2	-45.8313
3738.8	-45.813
3741.4	-45.7336
3744	-45.6177
3746.6	-45.5933
3749.2	-45.5231
3751.8	-45.3339
3754.4	-45.4285
3757	-45.4376
3759.6	-45.5261
3762.2	-45.4102
3764.8	-45.343
3767.4	-45.3186
3770	-45.2606
3772.6	-45.3461
3775.2	-45.3522
3777.8	-45.343
3780.4	-45.3644
3783	-45.2332
3785.6	-45.1752
3788.2	-45.2087
3790.8	-45.0745
3793.4	-45.0226
3796	-44.9371
3798.6	-44.9127
3801.2	-45.0256
3803.8	-44.9493
3806.4	-44.87
3809	-44.8181
3811.6	-44.7296
3814.2	-44.7784
3816.8	-44.7449
3819.4	-44.7906
3822	-44.7266
3824.6	-44.5496
3827.2	-44.4794
3829.8	-44.3573
3832.4	-44.278
3835	-44.2871
3837.6	-44.2932
3840.2	-44.3909
3842.8	-44.2993
3845.4	-44.2017
3848	-44.1925
3850.6	-43.9514
3853.2	-44.0216
3855.8	-44.0887
3858.4	-44.0674
3861	-44.2017
3863.6	-44.2566
3866.2	-44.3543
3868.8	-44.3451
3871.4	-44.4244
3874	-44.5129
3876.6	-44.5343
3879.2	-44.5709
3881.8	-44.5221
3884.4	-44.4916
3887	-44.577
3889.6	-44.4763
3892.2	-44.4031
3894.8	-44.4031
3897.4	-44.5312
3900	-44.6289
3902.6	-44.5648
3905.2	-44.4946
3907.8	-44.3634
3910.4	-44.1223
3913	-44.1925
3915.6	-44.0979
3918.2	-44.0949
3920.8	-43.9972
3923.4	-43.28
3926	-43.0573
3928.6	-42.9657
3931.2	-42.8467
3933.8	-42.7399
3936.4	-42.7582
3939	-42.8284
3941.6	-42.9504
3944.2	-42.9352
3946.8	-43.0695
3949.4	-43.1122
3952	-43.1335
3954.6	-43.1763
3957.2	-43.0451
3959.8	-43.0939
3962.4	-43.0878
3965	-43.1702
3967.6	-43.2861
3970.2	-43.2953
3972.8	-43.3929
3975.4	-43.5425
3978	-43.5211
3980.6	-43.573
3983.2	-43.3868
3985.8	-43.4631
3988.4	-43.3991
3991	-43.28
3993.6	-43.1854
3996.2	-42.9932
3998.8	-42.9443
4001.4	-42.8894
4004	-42.7551
4006.6	-42.7795
4009.2	-42.7063
4011.8	-42.6392
4014.4	-42.6972
4017	-42.6025
4019.6	-42.6941
4022.2	-42.6239
4024.8	-42.4988
4027.4	-42.4316
4030	-42.2913
4032.6	-42.4194
4035.2	-42.4408
4037.8	-42.5842
4040.4	-42.627
4043	-42.5842
4045.6	-42.5079
4048.2	-42.3737
4050.8	-42.2119
4053.4	-42.2882
4056	-42.2211
4058.6	-42.1661
4061.2	-42.1784
4063.8	-41.8945
4066.4	-41.8732
4069	-41.8243
4071.6	-41.7969
4074.2	-41.7603
4076.8	-41.7023
4079.4	-41.742
4082	-41.6687
4084.6	-41.7633
4087.2	-41.8579
4089.8	-41.7572
4092.4	-41.9006
4095	-42.0685
4097.6	-41.983
4100.2	-42.0685
4102.8	-41.8884
4105.4	-41.7389
4108	-41.6351
4110.6	-41.4917
4113.2	-41.4642
4115.8	-41.3849
4118.4	-41.2659
4121	-41.4398
4123.6	-41.3361
4126.2	-41.2384
4128.8	-41.2384
4131.4	-41.0828
4134	-41.0004
4136.6	-40.9088
4139.2	-40.9943
4141.8	-41.1682
4144.4	-41.1682
4147	-41.1194
4149.6	-41.1347
4152.2	-41.2903
4154.8	-41.4124
4157.4	-41.3757
4160	-41.4124
4162.6	-41.3361
4165.2	-41.217
4167.8	-41.1133
4170.4	-41.0767
4173	-41.3055
4175.6	-41.2933
4178.2	-41.2018
4180.8	-41.2293
4183.4	-40.9821
4186	-40.9546
4188.6	-40.8875
4191.2	-40.8478
4193.8	-41.1011
4196.4	-41.3086
4199	-41.3849
4201.6	-41.4551
4204.2	-41.3391
4206.8	-41.3544
4209.4	-41.3513
4212	-41.2964
4214.6	-41.3818
4217.2	-41.3391
4219.8	-41.333
4222.4	-41.2537
4225	-41.0095
4227.6	-40.802
4230.2	-40.5701
4232.8	-40.5304
4235.4	-40.5335
4238	-40.4846
4240.6	-40.5975
4243.2	-40.4083
4245.8	-40.2679
4248.4	-40.0452
4251	-39.798
4253.6	-39.7766
4256.2	-39.7308
4258.8	-39.7278
4261.4	-39.6301
4264	-39.5294
4266.6	-39.4592
4269.2	-39.3219
4271.8	-39.3585
4274.4	-39.3097
4277	-39.2761
4279.6	-39.3341
4282.2	-39.4501
4284.8	-39.325
4287.4	-39.3799
4290	-39.3738
4292.6	-39.5538
4295.2	-39.5416
4297.8	-39.6484
4300.4	-39.4745
4303	-39.1785
4305.6	-39.1388
4308.2	-39.0839
4310.8	-38.8977
4313.4	-38.9832
4316	-39.0656
4318.6	-39.1937
4321.2	-39.3188
4323.8	-39.1785
4326.4	-39.148
4329	-38.9679
4331.6	-38.5895
4334.2	-38.3972
4336.8	-38.5101
4339.4	-38.4644
4342	-38.3942
4344.6	-38.3728
4347.2	-38.4674
4349.8	-38.446
4352.4	-38.5773
4355	-38.678
4357.6	-38.7543
4360.2	-38.7512
4362.8	-38.7085
4365.4	-38.8824
4368	-38.9984
4370.6	-39.0167
4373.2	-39.0594
4375.8	-38.9954
4378.4	-39.0106
4381	-39.0991
4383.6	-39.1418
4386.2	-39.3097
4388.8	-39.2731
4391.4	-39.0625
4394	-39.0625
4396.6	-38.8947
4399.2	-38.8031
4401.8	-38.6902
4404.4	-38.6536
4407	-38.5468
4409.6	-38.44
4412.2	-38.3484
4414.8	-38.3484
4417.4	-38.3148
4420	-38.3545
4422.6	-38.3789
4425.2	-38.5651
4427.8	-38.5773
4430.4	-38.4674
4433	-38.5712
4435.6	-38.4338
4438.2	-38.4552
4440.8	-38.446
4443.4	-38.3484
4446	-38.4277
4448.6	-38.4583
4451.2	-38.3972
4453.8	-38.5346
4456.4	-38.5315
4459	-38.6139
4461.6	-38.6505
4464.2	-38.6322
4466.8	-38.7512
4469.4	-38.736
4472	-38.6749
4474.6	-38.5834
4477.2	-38.5956
4479.8	-38.7726
4482.4	-38.8519
4485	-38.8702
4487.6	-38.8947
4490.2	-38.7817
4492.8	-38.9893
4495.4	-39.0442
4498	-38.974
4500.6	-38.9526
4503.2	-38.6963
4505.8	-38.6963
4508.4	-38.5895
4511	-38.4705
4513.6	-38.4644
4516.2	-38.2294
4518.8	-38.0707
4521.4	-38.0585
4524	-37.9242
4526.6	-38.0035
4529.2	-38.0066
4531.8	-37.97
4534.4	-37.915
4537	-38.0157
4539.6	-38.15
4542.2	-37.9333
4544.8	-37.7655
4547.4	-37.6526
4550	-37.5824
4552.6	-37.7319
4555.2	-37.7899
4557.8	-37.6709
4560.4	-37.8143
4563	-37.7533
4565.6	-37.9364
4568.2	-38.0341
4570.8	-37.8479
4573.4	-37.738
4576	-37.6282
4578.6	-37.8937
4581.2	-38.1622
4583.8	-38.3362
4586.4	-38.4522
4589	-38.4369
4591.6	-38.2996
4594.2	-37.9639
4596.8	-37.7075
4599.4	-37.6556
4602	-37.6648
4604.6	-37.6526
4607.2	-37.6038
4609.8	-37.4481
4612.4	-37.5275
4615	-37.5305
4617.6	-37.4939
4620.2	-37.6648
4622.8	-37.5763
4625.4	-37.5122
4628	-37.4207
4630.6	-37.2986
4633.2	-37.1979
4635.8	-36.9568
4638.4	-36.8469
4641	-36.8164
4643.6	-36.7859
4646.2	-36.908
4648.8	-36.8622
4651.4	-36.8713
4654	-36.9202
4656.6	-36.8256
4659.2	-37.0239
4661.8	-36.9507
4664.4	-36.9568
4667	-36.7645
4669.6	-36.5448
4672.2	-36.4319
4674.8	-36.499
4677.4	-36.319
4680	-36.4502
4682.6	-36.3708
4685.2	-36.5143
4687.8	-36.6089
4690.4	-36.5723
4693	-36.5967
4695.6	-36.5479
4698.2	-36.5692
4700.8	-36.6455
4703.4	-36.5448
4706	-36.4288
4708.6	-36.2915
4711.2	-36.2671
4713.8	-36.4441
4716.4	-36.2732
4719	-36.3159
4721.6	-36.3312
4724.2	-36.38
4726.8	-36.4349
4729.4	-36.4227
4732	-36.4868
4734.6	-36.5204
4737.2	-36.5631
4739.8	-36.7188
4742.4	-36.9232
4745	-36.8927
4747.6	-36.853
4750.2	-36.792
4752.8	-36.8591
4755.4	-36.8011
4758	-36.7645
4760.6	-36.911
4763.2	-36.8408
4765.8	-36.9293
4768.4	-37.0056
4771	-37.0239
4773.6	-37.0728
4776.2	-37.1002
4778.8	-37.2284
4781.4	-37.2559
4784	-37.1796
4786.6	-37.2101
4789.2	-37.2833
4791.8	-37.3901
4794.4	-37.5671
4797	-37.6526
4799.6	-37.5244
4802.2	-37.4878
4804.8	-37.4115
4807.4	-37.207
4810	-37.1429
4812.6	-37.2223
4815.2	-37.085
4817.8	-37.1368
4820.4	-37.207
4823	-37.0728
4825.6	-36.9843
4828.2	-36.9202
4830.8	-36.8195
4833.4	-36.8866
4836	-36.7584
4838.6	-36.7615
4841.2	-36.8408
4843.8	-36.7554
4846.4	-36.8805
4849	-36.7371
4851.6	-36.7798
4854.2	-37.146
4856.8	-37.4725
4859.4	-37.6923
4862	-37.7899
4864.6	-38.0005
4867.2	-38.2141
4869.8	-38.2294
4872.4	-38.2385
4875	-38.1867
4877.6	-38.0585
4880.2	-37.9395
4882.8	-37.7228
4885.4	-37.7686
4888	-37.8479
4890.6	-37.7777
4893.2	-37.915
4895.8	-37.9639
4898.4	-38.1012
4901	-38.2172
4903.6	-38.0493
4906.2	-37.9303
4908.8	-37.7655
4911.4	-37.6007
4914	-37.5916
4916.6	-37.4451
4919.2	-37.323
4921.8	-37.1887
4924.4	-37.1033
4927	-37.0972
4929.6	-36.911
4932.2	-36.9659
4934.8	-36.8256
4937.4	-36.4807
4940	-36.4594
4942.6	-36.4044
4945.2	-36.4777
4947.8	-36.5234
4950.4	-36.4807
4953	-36.5997
4955.6	-36.615
4958.2	-36.7157
4960.8	-36.9171
4963.4	-36.8927
4966	-37.2131
4968.6	-37.6312
4971.2	-37.7808
4973.8	-38.0066
4976.4	-38.0615
4979	-38.1317
4981.6	-38.0951
4984.2	-37.8662
4986.8	-37.7441
4989.4	-37.561
4992	-37.442
4994.6	-37.3901
4997.2	-37.4329
4999.8	-37.3688
5002.4	-37.1857
5005	-37.0056
5007.6	-36.6882
5010.2	-36.4472
5012.8	-36.319
5015.4	-36.0108
5018	-35.7208
5020.6	-35.5011
5023.2	-35.2112
5025.8	-35.2142
5028.4	-35.1654
5031	-35.2478
5033.6	-35.4858
5036.2	-35.5988
5038.8	-35.8643
5041.4	-36.1542
5044	-36.0565
5046.6	-36.1816
5049.2	-36.142
5051.8	-35.9924
5054.4	-35.8948
5057	-35.9131
5059.6	-35.7025
5062.2	-35.5499
5064.8	-35.4065
5067.4	-35.2295
5070	-35.1501
5072.6	-34.9365
5075.2	-34.7229
5077.8	-34.8389
5080.4	-35.1715
5083	-35.3851
5085.6	-35.6232
5088.2	-35.6995
5090.8	-35.7269
5093.4	-35.8734
5096	-35.7178
5098.6	-35.7056
5101.2	-35.8398
5103.8	-35.9985
5106.4	-36.1389
5109	-36.2213
5111.6	-36.3861
5114.2	-36.4563
5116.8	-36.4288
5119.4	-36.3525
5122	-36.4655
5124.6	-36.5418
5127.2	-36.6333
5129.8	-36.618
5132.4	-36.7462
5135	-36.9293
5137.6	-37.0422
5140.2	-37.1185
5142.8	-37.1307
5145.4	-37.0453
5148	-36.8164
5150.6	-36.676
5153.2	-36.6486
5155.8	-36.5662
5158.4	-36.6089
5161	-36.5326
5163.6	-36.6791
5166.2	-36.8805
5168.8	-36.9293
5171.4	-36.9354
5174	-37.0178
5176.6	-37.1338
5179.2	-37.3535
5181.8	-37.1735
5184.4	-36.9965
5187	-36.8042
5189.6	-36.6211
5192.2	-36.7004
[truncated: 571,522+ more rows]

## Sheet: Figure 3 C ii
ACSF	GdCl3	ACSF
-54.38	-72.51	-67.26
-49.29	-71.47	-53.47
-40.11	-65.66	-43.51
-52.12	-66.28	-60.87
-46.81	-70.64	-63.27
-57.47	-71.39	-58.96
-41.97	-64.18	-60.81
