# Supplementary material for: The cation channel mechanisms of subthreshold inward depolarizing currents in the mice VTA dopaminergic neurons and their roles in the chronic-stress-induced depression-like behavior
Source: eLife. 2024 Dec 6;12:RP88319. doi: 10.7554/eLife.88319 (PMC11623934; doi:10.7554/eLife.88319)
Supplement: Figure 3—source data 5. [file elife-88319-fig3-data5.xlsx]

## Sheet: Figure 3 Di
example traces							time-course
acsf			GdCl3
Time(ms)	RMP(mv)		Time(ms)	RMP(mv)			Time(min)	Firing rate(Hz)
0	-0.10376		0	-0.03662			0.17	2.2549
0.10938	-0.09918		0.125	-0.03662			0.34	2.64706
0.20313	-0.09308		0.25	-0.05493			0.51	2.2549
0.3125	-0.0824		0.3125	-0.04425			0.68	2.35294
0.40625	-0.09155		0.4375	-0.05188			0.85	2.15686
0.5	-0.09003		0.5	-0.06104			1.02	2.2549
0.60938	-0.07477		0.625	-0.05493			1.19	2.05882
0.70313	-0.07324		0.75	-0.06714			1.36	2.2549
0.8125	-0.06714		0.8125	-0.06409			1.53	2.15686
0.90625	-0.05798		0.9375	-0.05341			1.7	2.2549
1	-0.06714		1	-0.05798			1.87	2.2549
1.10938	-0.05951		1.125	-0.05798			2.04	2.2549
1.20313	-0.04578		1.25	-0.06561			2.21	2.2549
1.3125	-0.0351		1.3125	-0.07324			2.38	2.05882
1.40625	-0.02594		1.4375	-0.06866			2.55	2.2549
1.5	-0.00916		1.5	-0.06409			2.72	2.35294
1.60938	-0.0061		1.625	-0.07019			2.89	1.76471
1.70313	-0.0061		1.75	-0.05493			3.06	2.05882
1.8125	-0.02289		1.8125	-0.07629			3.23	2.05882
1.90625	-0.02289		1.9375	-0.07172			3.4	2.05882
2	-0.01373		2	-0.09003			3.57	2.05882
2.10938	-0.00763		2.125	-0.09003			3.74	2.05882
2.20313	0.00916		2.25	-0.07172			3.91	1.96078
2.3125	0.00763		2.3125	-0.06866			4.08	1.96078
2.40625	0.0061		2.4375	-0.06256			4.25	2.15686
2.5	-0.00153		2.5	-0.07172			4.42	1.96078
2.60938	0.0061		2.625	-0.05951			4.59	1.86275
2.70313	-0.00153		2.75	-0.05798			4.76	1.86275
2.8125	-0.00153		2.8125	-0.05493			4.93	1.86275
2.90625	-0.01068		2.9375	-0.05798			5.1	1.96078
3	-0.01678		3	-0.05798			5.27	2.15686
3.10938	-0.01526		3.125	-0.05646			5.44	1.86275
3.20313	-0.02747		3.25	-0.0473			5.61	2.05882
3.3125	-0.03967		3.3125	-0.04578			5.78	1.96078
3.40625	-0.03357		3.4375	-0.05188			5.95	2.15686
3.5	-0.03815		3.5	-0.04272			6.12	1.86275
3.60938	-0.04578		3.625	-0.0351			6.29	1.86275
3.70313	-0.05035		3.75	-0.03204			6.46	2.2549
3.8125	-0.07629		3.8125	-0.01678			6.63	1.76471
3.90625	-0.07629		3.9375	-0.00458			6.8	1.96078
4	-0.08698		4	0.00153			6.97	1.96078
4.10938	-0.08392		4.125	0.00305			7.14	1.86275
4.20313	-0.09003		4.25	0.00305			7.31	1.96078
4.3125	-0.10681		4.3125	0.00153			7.48	1.86275
4.40625	-0.10986		4.4375	0.01678			7.65	2.05882
4.5	-0.10986		4.5	0.01984			7.82	1.86275
4.60938	-0.11444		4.625	0.01831			7.99	1.96078
4.70313	-0.12054		4.75	0.0061			8.16	1.96078
4.8125	-0.12207		4.8125	0.00458			8.33	1.96078
4.90625	-0.13275		4.9375	0.0061			8.5	1.76471
5	-0.13885		5	-0.00153			8.67	1.76471
5.10938	-0.14343		5.125	-0.01221			8.84	1.76471
5.20313	-0.15106		5.25	-0.02136			9.01	1.56863
5.3125	-0.15411		5.3125	-0.02289			9.18	1.47059
5.40625	-0.14343		5.4375	-0.01526			9.35	1.76471
5.5	-0.14038		5.5	-0.02289			9.52	1.66667
5.60938	-0.13733		5.625	-0.02899			9.69	1.76471
5.70313	-0.1297		5.75	-0.03815			9.86	1.86275
5.8125	-0.12512		5.8125	-0.0473			10.03	1.37255
5.90625	-0.11444		5.9375	-0.06256			10.2	1.47059
6	-0.12054		6	-0.06561			10.37	1.37255
6.10938	-0.13275		6.125	-0.06561			10.54	1.47059
6.20313	-0.1297		6.25	-0.0824			10.71	1.37255
6.3125	-0.13123		6.3125	-0.09918			10.88	1.56863
6.40625	-0.12512		6.4375	-0.10071			11.05	1.47059
6.5	-0.10986		6.5	-0.10834			11.22	1.47059
6.60938	-0.08545		6.625	-0.09766			11.39	1.47059
6.70313	-0.07629		6.75	-0.10376			11.56	1.56863
6.8125	-0.07477		6.8125	-0.11139			11.73	1.47059
6.90625	-0.07172		6.9375	-0.12054			11.9	1.37255
7	-0.05798		7	-0.11749			12.07	1.86275
7.10938	-0.06256		7.125	-0.12817			12.24	1.37255
7.20313	-0.07324		7.25	-0.14496			12.41	1.56863
7.3125	-0.05188		7.3125	-0.14801			12.58	1.56863
7.40625	-0.05646		7.4375	-0.14954			12.75	1.56863
7.5	-0.05798		7.5	-0.1358			12.92	1.56863
7.60938	-0.05798		7.625	-0.12817			13.09	1.56863
7.70313	-0.05035		7.75	-0.11292			13.26	1.56863
7.8125	-0.05035		7.8125	-0.11902			13.43	1.76471
7.90625	-0.04425		7.9375	-0.1236			13.6	1.66667
8	-0.05798		8	-0.1236			13.77	1.76471
8.10938	-0.06866		8.125	-0.10834			13.94	2.05882
8.20313	-0.05798		8.25	-0.11597			14.11	1.96078
8.3125	-0.05951		8.3125	-0.09613			14.28	2.05882
8.40625	-0.04425		8.4375	-0.10071			14.45	2.15686
8.5	-0.04883		8.5	-0.08698			14.62	2.15686
8.60938	-0.05493		8.625	-0.07935			14.79	2.2549
8.70313	-0.06866		8.75	-0.07019			14.96	2.35294
8.8125	-0.07019		8.8125	-0.0824			15.13	2.35294
8.90625	-0.07019		8.9375	-0.07019			15.3	2.35294
9	-0.06866		9	-0.06409			15.47	2.35294
9.10938	-0.05951		9.125	-0.07172			15.64	2.35294
9.20313	-0.07629		9.25	-0.07324			15.81	2.2549
9.3125	-0.07629		9.3125	-0.06714			15.98	2.2549
9.40625	-0.07324		9.4375	-0.07172			16.15	2.15686
9.5	-0.07477		9.5	-0.07629			16.32	2.2549
9.60938	-0.08392		9.625	-0.06561			16.49	1.96078
9.70313	-0.07019		9.75	-0.08087
9.8125	-0.06714		9.8125	-0.07172
9.90625	-0.06714		9.9375	-0.0885
10	-0.06866		10	-0.08545
10.1094	-0.07019		10.125	-0.07629
10.2031	-0.06714		10.25	-0.07477
10.3125	-0.07935		10.3125	-0.06256
10.4062	-0.07629		10.4375	-0.05798
10.5	-0.07324		10.5	-0.07172
10.6094	-0.06866		10.625	-0.05341
10.7031	-0.07935		10.75	-0.05493
10.8125	-0.07935		10.8125	-0.06561
10.9062	-0.08698		10.9375	-0.07019
11	-0.09766		11	-0.06714
11.1094	-0.09155		11.125	-0.05493
11.2031	-0.09613		11.25	-0.04272
11.3125	-0.09766		11.3125	-0.05035
11.4062	-0.09003		11.4375	-0.04425
11.5	-0.08698		11.5	-0.0412
11.6094	-0.0946		11.625	-0.0351
11.7031	-0.09308		11.75	-0.0412
11.8125	-0.11139		11.8125	-0.0412
11.9062	-0.11139		11.9375	-0.05341
12	-0.12207		12	-0.05188
12.1094	-0.13428		12.125	-0.06104
12.2031	-0.11597		12.25	-0.05493
12.3125	-0.10834		12.3125	-0.07477
12.4062	-0.11444		12.4375	-0.06714
12.5	-0.10529		12.5	-0.07324
12.6094	-0.09918		12.625	-0.06714
12.7031	-0.11444		12.75	-0.05951
12.8125	-0.12207		12.8125	-0.07477
12.9062	-0.10529		12.9375	-0.07782
13	-0.10681		13	-0.08698
13.1094	-0.09766		13.125	-0.07935
13.2031	-0.08392		13.25	-0.09308
13.3125	-0.07172		13.3125	-0.09918
13.4062	-0.06714		13.4375	-0.10986
13.5	-0.07324		13.5	-0.09918
13.6094	-0.06104		13.625	-0.09766
13.7031	-0.06256		13.75	-0.11597
13.8125	-0.06256		13.8125	-0.11597
13.9062	-0.05646		13.9375	-0.12817
14	-0.04272		14	-0.12665
14.1094	-0.04425		14.125	-0.12512
14.2031	-0.04425		14.25	-0.11902
14.3125	-0.03204		14.3125	-0.1358
14.4062	-0.03204		14.4375	-0.13123
14.5	-0.03052		14.5	-0.13123
14.6094	-0.03357		14.625	-0.13885
14.7031	-0.03052		14.75	-0.10834
14.8125	-0.02594		14.8125	-0.09918
14.9062	-0.02594		14.9375	-0.10986
15	-0.01831		15	-0.09766
15.1094	-0.01221		15.125	-0.09918
15.2031	-0.01373		15.25	-0.09308
15.3125	-0.01831		15.3125	-0.09308
15.4062	-0.02289		15.4375	-0.09155
15.5	-0.03052		15.5	-0.09003
15.6094	-0.03357		15.625	-0.07782
15.7031	-0.02899		15.75	-0.08698
15.8125	-0.02441		15.8125	-0.06409
15.9062	-0.03967		15.9375	-0.05951
16	-0.04578		16	-0.05035
16.1094	-0.05341		16.125	-0.0351
16.2031	-0.05035		16.25	-0.04578
16.3125	-0.04272		16.3125	-0.02136
16.4062	-0.04425		16.4375	-0.01373
16.5	-0.04425		16.5	-0.00916
16.6094	-0.04272		16.625	0.00458
16.7031	-0.02899		16.75	0.01678
16.8125	-0.02899		16.8125	0.00916
16.9062	-0.03204		16.9375	0.00916
17	-0.05341		17	0.00916
17.1094	-0.05951		17.125	0.00458
17.2031	-0.05035		17.25	0.0061
17.3125	-0.05646		17.3125	-0.00153
17.4062	-0.05188		17.4375	0.02136
17.5	-0.05798		17.5	0.01373
17.6094	-0.06256		17.625	0.00305
17.7031	-0.0824		17.75	-0.01068
17.8125	-0.07935		17.8125	-0.00305
17.9062	-0.07629		17.9375	0
18	-0.07019		18	-0.00763
18.1094	-0.06561		18.125	-0.02747
18.2031	-0.04883		18.25	-0.02899
18.3125	-0.05188		18.3125	-0.02747
18.4062	-0.05035		18.4375	-0.02441
18.5	-0.05646		18.5	-0.03662
18.6094	-0.06714		18.625	-0.02441
18.7031	-0.07324		18.75	-0.03052
18.8125	-0.08545		18.8125	-0.04272
18.9062	-0.06866		18.9375	-0.0473
19	-0.07477		19	-0.04883
19.1094	-0.06866		19.125	-0.03204
19.2031	-0.07477		19.25	-0.02594
19.3125	-0.07477		19.3125	-0.02747
19.4062	-0.07782		19.4375	-0.02747
19.5	-0.07782		19.5	-0.02136
19.6094	-0.06409		19.625	-0.02136
19.7031	-0.05951		19.75	-0.03662
19.8125	-0.06256		19.8125	-0.03967
19.9062	-0.06561		19.9375	-0.0351
20	-0.05646		20	-0.04272
20.1094	-0.07019		20.125	-0.03662
20.2031	-0.07477		20.25	-0.03815
20.3125	-0.05798		20.3125	-0.03357
20.4062	-0.06714		20.4375	-0.05035
20.5	-0.0473		20.5	-0.04272
20.6094	-0.05188		20.625	-0.05188
20.7031	-0.05341		20.75	-0.05951
20.8125	-0.0473		20.8125	-0.05646
20.9062	-0.0412		20.9375	-0.03967
21	-0.04883		21	-0.03662
21.1094	-0.04578		21.125	-0.03204
21.2031	-0.03815		21.25	-0.02747
21.3125	-0.03662		21.3125	-0.05951
21.4062	-0.02899		21.4375	-0.0351
21.5	-0.03815		21.5	-0.03967
21.6094	-0.03204		21.625	-0.03052
21.7031	-0.03357		21.75	-0.03662
21.8125	-0.03204		21.8125	-0.04883
21.9062	-0.02289		21.9375	-0.03815
22	-0.01831		22	-0.05951
22.1094	-0.01831		22.125	-0.06409
22.2031	-0.01831		22.25	-0.07019
22.3125	-0.01068		22.3125	-0.07477
22.4062	-0.00305		22.4375	-0.06104
22.5	0.00305		22.5	-0.06256
22.6094	0.00763		22.625	-0.07019
22.7031	0.0061		22.75	-0.05493
22.8125	0.00153		22.8125	-0.03815
22.9062	-0.00458		22.9375	-0.04272
23	-0.01221		23	-0.03357
23.1094	-0.02899		23.125	-0.01678
23.2031	-0.03662		23.25	-0.01984
23.3125	-0.05493		23.3125	-0.01068
23.4062	-0.05493		23.4375	0.00153
23.5	-0.06256		23.5	-0.00458
23.6094	-0.05493		23.625	-0.00916
23.7031	-0.06256		23.75	-0.01068
23.8125	-0.07172		23.8125	-0.0061
23.9062	-0.07019		23.9375	0.00458
24	-0.07019		24	0
24.1094	-0.07477		24.125	0.02289
24.2031	-0.10071		24.25	0.02594
24.3125	-0.10071		24.3125	0.00916
24.4062	-0.10986		24.4375	0.01831
24.5	-0.10071		24.5	0.01526
24.6094	-0.10223		24.625	0.01068
24.7031	-0.11139		24.75	0.02747
24.8125	-0.11444		24.8125	0.02899
24.9062	-0.12665		24.9375	0.03204
25	-0.12817		25	0.03052
25.1094	-0.13733		25.125	0.01678
25.2031	-0.14648		25.25	0
25.3125	-0.15259		25.3125	-0.01831
25.4062	-0.14801		25.4375	-0.01068
25.5	-0.13733		25.5	-0.02289
25.6094	-0.12665		25.625	-0.03357
25.7031	-0.12512		25.75	-0.03204
25.8125	-0.12817		25.8125	-0.03967
25.9062	-0.12207		25.9375	-0.0412
26	-0.11139		26	-0.04272
26.1094	-0.11139		26.125	-0.05493
26.2031	-0.11597		26.25	-0.05951
26.3125	-0.11597		26.3125	-0.06866
26.4062	-0.12207		26.4375	-0.08087
26.5	-0.12207		26.5	-0.10529
26.6094	-0.11749		26.625	-0.11597
26.7031	-0.10071		26.75	-0.10223
26.8125	-0.10223		26.8125	-0.10223
26.9062	-0.09766		26.9375	-0.09766
27	-0.08698		27	-0.0885
27.1094	-0.09918		27.125	-0.11902
27.2031	-0.0885		27.25	-0.10986
27.3125	-0.07782		27.3125	-0.0946
27.4062	-0.07935		27.4375	-0.11444
27.5	-0.0824		27.5	-0.11139
27.6094	-0.08698		27.625	-0.11597
27.7031	-0.07477		27.75	-0.11597
27.8125	-0.09155		27.8125	-0.11597
27.9062	-0.0946		27.9375	-0.11902
28	-0.09155		28	-0.11749
28.1094	-0.07324		28.125	-0.10986
28.2031	-0.07324		28.25	-0.11292
28.3125	-0.06866		28.3125	-0.11139
28.4062	-0.06409		28.4375	-0.0946
28.5	-0.06714		28.5	-0.09308
28.6094	-0.06256		28.625	-0.0885
28.7031	-0.05493		28.75	-0.09766
28.8125	-0.05341		28.8125	-0.10376
28.9062	-0.06104		28.9375	-0.10529
29	-0.05035		29	-0.0946
29.1094	-0.06714		29.125	-0.09308
29.2031	-0.06104		29.25	-0.07172
29.3125	-0.06104		29.3125	-0.07935
29.4062	-0.06256		29.4375	-0.0885
29.5	-0.05646		29.5	-0.07782
29.6094	-0.05188		29.625	-0.08698
29.7031	-0.04578		29.75	-0.08087
29.8125	-0.0473		29.8125	-0.05646
29.9062	-0.07172		29.9375	-0.03815
30	-0.06561		30	-0.0351
30.1094	-0.06409		30.125	-0.03815
30.2031	-0.04425		30.25	-0.0351
30.3125	-0.04425		30.3125	-0.03052
30.4062	-0.0473		30.4375	-0.04272
30.5	-0.05341		30.5	-0.04272
30.6094	-0.05341		30.625	-0.0473
30.7031	-0.06714		30.75	-0.05646
30.8125	-0.08392		30.8125	-0.0412
30.9062	-0.08087		30.9375	-0.03815
31	-0.08545		31	-0.04425
31.1094	-0.0824		31.125	-0.05798
31.2031	-0.09308		31.25	-0.04883
31.3125	-0.10071		31.3125	-0.05035
31.4062	-0.09918		31.4375	-0.05951
31.5	-0.08392		31.5	-0.06104
31.6094	-0.0885		31.625	-0.07629
31.7031	-0.0885		31.75	-0.07782
31.8125	-0.09918		31.8125	-0.07629
31.9062	-0.10986		31.9375	-0.06409
32	-0.10986		32	-0.07019
32.1094	-0.11597		32.125	-0.06409
32.2031	-0.11292		32.25	-0.07019
32.3125	-0.09918		32.3125	-0.08087
32.4062	-0.10071		32.4375	-0.07629
32.5	-0.11139		32.5	-0.08392
32.6094	-0.10223		32.625	-0.08545
32.7031	-0.10376		32.75	-0.07477
32.8125	-0.09918		32.8125	-0.07629
32.9062	-0.10071		32.9375	-0.06714
33	-0.09918		33	-0.06714
33.1094	-0.0946		33.125	-0.05646
33.2031	-0.0946		33.25	-0.05188
33.3125	-0.09155		33.3125	-0.04578
33.4062	-0.07782		33.4375	-0.06561
33.5	-0.08698		33.5	-0.07629
33.6094	-0.09308		33.625	-0.0885
33.7031	-0.08545		33.75	-0.0824
33.8125	-0.07935		33.8125	-0.0824
33.9062	-0.06409		33.9375	-0.0824
34	-0.07477		34	-0.10223
34.1094	-0.05341		34.125	-0.09308
34.2031	-0.05493		34.25	-0.11902
34.3125	-0.0412		34.3125	-0.12207
34.4062	-0.03052		34.4375	-0.10376
34.5	-0.01984		34.5	-0.10376
34.6094	-0.01221		34.625	-0.10376
34.7031	-0.02289		34.75	-0.10834
34.8125	-0.01526		34.8125	-0.09766
34.9062	-0.02747		34.9375	-0.09155
35	-0.03357		35	-0.08698
35.1094	-0.03662		35.125	-0.07935
35.2031	-0.03815		35.25	-0.07629
35.3125	-0.03967		35.3125	-0.07324
35.4062	-0.03662		35.4375	-0.05798
35.5	-0.03052		35.5	-0.07324
35.6094	-0.03357		35.625	-0.05493
35.7031	-0.03662		35.75	-0.03815
35.8125	-0.03967		35.8125	-0.03052
35.9062	-0.05341		35.9375	-0.01221
36	-0.06409		36	-0.01373
36.1094	-0.07019		36.125	-0.00458
36.2031	-0.06409		36.25	-0.01221
36.3125	-0.06409		36.3125	-0.02747
36.4062	-0.07019		36.4375	-0.02441
36.5	-0.0824		36.5	-0.03967
36.6094	-0.07935		36.625	-0.01831
36.7031	-0.08392		36.75	-0.00763
36.8125	-0.0824		36.8125	-0.01526
36.9062	-0.07782		36.9375	-0.02441
37	-0.07324		37	-0.01221
37.1094	-0.08698		37.125	-0.00153
37.2031	-0.07019		37.25	-0.01678
37.3125	-0.07324		37.3125	-0.01221
37.4062	-0.06714		37.4375	-0.01526
37.5	-0.06866		37.5	-0.01526
37.6094	-0.07172		37.625	-0.01373
37.7031	-0.06104		37.75	-0.02747
37.8125	-0.06409		37.8125	-0.04272
37.9062	-0.06866		37.9375	-0.03357
38	-0.06714		38	-0.02441
38.1094	-0.07172		38.125	-0.01984
38.2031	-0.07782		38.25	-0.01526
38.3125	-0.09155		38.3125	-0.02289
38.4062	-0.08545		38.4375	-0.01221
38.5	-0.0946		38.5	-0.01678
38.6094	-0.09766		38.625	-0.01221
38.7031	-0.10376		38.75	-0.00763
38.8125	-0.11292		38.8125	-0.02136
38.9062	-0.11292		38.9375	-0.01984
39	-0.09613		39	-0.02441
39.1094	-0.09003		39.125	-0.0351
39.2031	-0.09613		39.25	-0.04578
39.3125	-0.09003		39.3125	-0.02899
39.4062	-0.09766		39.4375	-0.0351
39.5	-0.09308		39.5	-0.02899
39.6094	-0.10529		39.625	-0.02289
39.7031	-0.09003		39.75	-0.0473
39.8125	-0.07172		39.8125	-0.02899
39.9062	-0.06561		39.9375	-0.03815
40	-0.07172		40	-0.02747
40.1094	-0.06866		40.125	-0.05035
40.2031	-0.07324		40.25	-0.05646
40.3125	-0.07477		40.3125	-0.05951
40.4062	-0.07629		40.4375	-0.05798
40.5	-0.06866		40.5	-0.01831
40.6094	-0.06104		40.625	-0.01068
40.7031	-0.05646		40.75	-0.01526
40.8125	-0.05951		40.8125	-0.02747
40.9062	-0.06409		40.9375	-0.03052
41	-0.06256		41	-0.06256
41.1094	-0.05341		41.125	-0.06561
41.2031	-0.03662		41.25	-0.07477
41.3125	-0.0351		41.3125	-0.07324
41.4062	-0.02899		41.4375	-0.08392
41.5	-0.02594		41.5	-0.07935
41.6094	-0.02747		41.625	-0.07172
41.7031	-0.01526		41.75	-0.08545
41.8125	0		41.8125	-0.0824
41.9062	-0.00305		41.9375	-0.09918
42	-0.00153		42	-0.10071
42.1094	-0.0061		42.125	-0.08545
42.2031	0.00153		42.25	-0.07782
42.3125	-0.01221		42.3125	-0.10071
42.4062	-0.01068		42.4375	-0.0946
42.5	-0.02289		42.5	-0.0885
42.6094	-0.01831		42.625	-0.0885
42.7031	-0.02289		42.75	-0.08087
42.8125	-0.02747		42.8125	-0.07019
42.9062	-0.01526		42.9375	-0.05188
43	-0.01678		43	-0.04272
43.1094	-0.00458		43.125	-0.02899
43.2031	-0.01831		43.25	-0.02289
43.3125	-0.02441		43.3125	-0.03204
43.4062	-0.0412		43.4375	-0.03967
43.5	-0.04425		43.5	-0.04272
43.6094	-0.06104		43.625	-0.03662
43.7031	-0.07172		43.75	-0.02441
43.8125	-0.06561		43.8125	-0.02289
43.9062	-0.08392		43.9375	-0.01373
44	-0.08087		44	-0.00916
44.1094	-0.09003		44.125	-0.00763
44.2031	-0.10223		44.25	-0.02289
44.3125	-0.11902		44.3125	-0.01221
44.4062	-0.11749		44.4375	-0.01678
44.5	-0.12054		44.5	-0.01373
44.6094	-0.14343		44.625	-0.03967
44.7031	-0.14038		44.75	-0.03052
44.8125	-0.14343		44.8125	-0.03052
44.9062	-0.13885		44.9375	-0.02899
45	-0.13428		45	-0.02747
45.1094	-0.13123		45.125	-0.01984
45.2031	-0.11749		45.25	-0.04425
45.3125	-0.12054		45.3125	-0.03967
45.4062	-0.10681		45.4375	-0.04578
45.5	-0.11139		45.5	-0.06409
45.6094	-0.11444		45.625	-0.06256
45.7031	-0.11292		45.75	-0.0824
45.8125	-0.10681		45.8125	-0.0824
45.9062	-0.11139		45.9375	-0.08545
46	-0.10834		46	-0.08392
46.1094	-0.10681		46.125	-0.07782
46.2031	-0.10834		46.25	-0.0885
46.3125	-0.10834		46.3125	-0.09308
46.4062	-0.08545		46.4375	-0.09766
46.5	-0.07629		46.5	-0.10529
46.6094	-0.07477		46.625	-0.10529
46.7031	-0.09003		46.75	-0.10681
46.8125	-0.0824		46.8125	-0.1236
46.9062	-0.07935		46.9375	-0.1358
47	-0.07172		47	-0.13428
47.1094	-0.06866		47.125	-0.14496
47.2031	-0.07019		47.25	-0.14038
47.3125	-0.06561		47.3125	-0.13885
47.4062	-0.06256		47.4375	-0.13733
47.5	-0.06256		47.5	-0.14801
47.6094	-0.05341		47.625	-0.1358
47.7031	-0.03967		47.75	-0.13123
47.8125	-0.03815		47.8125	-0.14648
47.9062	-0.03357		47.9375	-0.15106
48	-0.03052		48	-0.14343
48.1094	-0.04272		48.125	-0.1297
48.2031	-0.05035		48.25	-0.14343
48.3125	-0.05341		48.3125	-0.12207
48.4062	-0.03967		48.4375	-0.11597
48.5	-0.04578		48.5	-0.10986
48.6094	-0.05188		48.625	-0.10223
48.7031	-0.0473		48.75	-0.10071
48.8125	-0.05188		48.8125	-0.10529
48.9062	-0.05493		48.9375	-0.09918
49	-0.06256		49	-0.09613
49.1094	-0.05646		49.125	-0.10834
49.2031	-0.05798		49.25	-0.09003
49.3125	-0.0473		49.3125	-0.08698
49.4062	-0.05341		49.4375	-0.08545
49.5	-0.05035		49.5	-0.0824
49.6094	-0.06714		49.625	-0.06409
49.7031	-0.06714		49.75	-0.08087
49.8125	-0.05951		49.8125	-0.06256
49.9062	-0.07019		49.9375	-0.05798
50	-0.06866		50	-0.07172
50.1094	-0.06561		50.125	-0.08698
50.2031	-0.06409		50.25	-0.08545
50.3125	-0.07477		50.3125	-0.08545
50.4062	-0.07324		50.4375	-0.09003
50.5	-0.07172		50.5	-0.08545
50.6094	-0.07172		50.625	-0.08087
50.7031	-0.06256		50.75	-0.06561
50.8125	-0.07935		50.8125	-0.05493
50.9062	-0.08545		50.9375	-0.06561
51	-0.09308		51	-0.05493
51.1094	-0.09613		51.125	-0.06866
51.2031	-0.0946		51.25	-0.06256
51.3125	-0.10529		51.3125	-0.05951
51.4062	-0.10529		51.4375	-0.06866
51.5	-0.09613		51.5	-0.06866
51.6094	-0.09003		51.625	-0.05646
51.7031	-0.10681		51.75	-0.05646
51.8125	-0.10681		51.8125	-0.04883
51.9062	-0.10834		51.9375	-0.06714
52	-0.11292		52	-0.07019
52.1094	-0.13428		52.125	-0.06256
52.2031	-0.14648		52.25	-0.05341
52.3125	-0.15106		52.3125	-0.06561
52.4062	-0.14496		52.4375	-0.06714
52.5	-0.14191		52.5	-0.08698
52.6094	-0.14191		52.625	-0.08698
52.7031	-0.13275		52.75	-0.09155
52.8125	-0.12817		52.8125	-0.10071
52.9062	-0.11749		52.9375	-0.11139
53	-0.11444		53	-0.10681
53.1094	-0.11292		53.125	-0.10986
53.2031	-0.11139		53.25	-0.12054
53.3125	-0.09918		53.3125	-0.12512
53.4062	-0.08392		53.4375	-0.12207
53.5	-0.0824		53.5	-0.12512
53.6094	-0.07324		53.625	-0.11597
53.7031	-0.08698		53.75	-0.12817
53.8125	-0.06409		53.8125	-0.11749
53.9062	-0.05188		53.9375	-0.12054
54	-0.04883		54	-0.1236
54.1094	-0.03815		54.125	-0.12054
54.2031	-0.03357		54.25	-0.12817
54.3125	-0.04272		54.3125	-0.12665
54.4062	-0.0412		54.4375	-0.12054
54.5	-0.03967		54.5	-0.11292
54.6094	-0.04578		54.625	-0.12817
54.7031	-0.04883		54.75	-0.1297
54.8125	-0.0473		54.8125	-0.1297
54.9062	-0.0412		54.9375	-0.1358
55	-0.03662		55	-0.13428
55.1094	-0.0473		55.125	-0.13428
55.2031	-0.03204		55.25	-0.13885
55.3125	-0.01678		55.3125	-0.13123
55.4062	-0.00305		55.4375	-0.11292
55.5	-0.00305		55.5	-0.10986
55.6094	-0.00916		55.625	-0.10529
55.7031	-0.00458		55.75	-0.09308
55.8125	-0.00458		55.8125	-0.07629
55.9062	-0.00916		55.9375	-0.06714
56	-0.01678		56	-0.05951
56.1094	-0.0061		56.125	-0.03815
56.2031	-0.00458		56.25	-0.05341
56.3125	-0.0061		56.3125	-0.04883
56.4062	-0.01373		56.4375	-0.0351
56.5	-0.01831		56.5	-0.03815
56.6094	-0.02441		56.625	-0.03815
56.7031	-0.01526		56.75	-0.03204
56.8125	-0.02594		56.8125	-0.02441
56.9062	-0.02136		56.9375	-0.03815
57	-0.02441		57	-0.02441
57.1094	-0.0351		57.125	-0.03662
57.2031	-0.0412		57.25	-0.02747
57.3125	-0.0412		57.3125	-0.02136
57.4062	-0.06409		57.4375	-0.02899
57.5	-0.06866		57.5	-0.01221
57.6094	-0.07629		57.625	-0.00458
57.7031	-0.08698		57.75	0.00153
57.8125	-0.09613		57.8125	-0.00153
57.9062	-0.10681		57.9375	0.00916
58	-0.10071		58	0.00458
58.1094	-0.08545		58.125	0.01526
58.2031	-0.10223		58.25	-0.00916
58.3125	-0.10376		58.3125	-0.00916
58.4062	-0.09003		58.4375	-0.02441
58.5	-0.0946		58.5	-0.03815
58.6094	-0.09155		58.625	-0.03052
58.7031	-0.08545		58.75	-0.03357
58.8125	-0.0946		58.8125	-0.03204
58.9062	-0.09918		58.9375	-0.03815
59	-0.09003		59	-0.02441
59.1094	-0.0885		59.125	-0.02441
59.2031	-0.08392		59.25	-0.02594
59.3125	-0.09155		59.3125	-0.03357
59.4062	-0.09155		59.4375	-0.03357
59.5	-0.08087		59.5	-0.03967
59.6094	-0.06714		59.625	-0.05646
59.7031	-0.06104		59.75	-0.05188
59.8125	-0.05493		59.8125	-0.05646
59.9062	-0.05493		59.9375	-0.0473
60	-0.05951		60	-0.04578
60.1094	-0.05951		60.125	-0.04425
60.2031	-0.05951		60.25	-0.05646
60.3125	-0.05188		60.3125	-0.05035
60.4062	-0.05188		60.4375	-0.03967
60.5	-0.04578		60.5	-0.04272
60.6094	-0.05188		60.625	-0.04425
60.7031	-0.0473		60.75	-0.04883
60.8125	-0.0351		60.8125	-0.05798
60.9062	-0.03662		60.9375	-0.05493
61	-0.03967		61	-0.04425
61.1094	-0.03662		61.125	-0.0412
61.2031	-0.01984		61.25	-0.03815
61.3125	-0.00916		61.3125	-0.03815
61.4062	-0.00763		61.4375	-0.05951
61.5	-0.01678		61.5	-0.05951
61.6094	-0.00916		61.625	-0.07172
61.7031	-0.00305		61.75	-0.07019
61.8125	-0.01221		61.8125	-0.06104
61.9062	0		61.9375	-0.05188
62	0.00305		62	-0.04272
62.1094	0.01373		62.125	-0.0412
62.2031	0.0061		62.25	-0.03815
62.3125	0.00916		62.3125	-0.0351
62.4062	0.00916		62.4375	-0.03052
62.5	-0.00916		62.5	-0.0351
62.6094	-0.00763		62.625	-0.03052
62.7031	-0.03052		62.75	-0.03815
62.8125	-0.04272		62.8125	-0.05188
62.9062	-0.04425		62.9375	-0.05493
63	-0.03967		63	-0.05035
63.1094	-0.05188		63.125	-0.04578
63.2031	-0.05188		63.25	-0.04883
63.3125	-0.07477		63.3125	-0.04578
63.4062	-0.08698		63.4375	-0.03357
63.5	-0.09003		63.5	-0.0351
63.6094	-0.09918		63.625	-0.02594
63.7031	-0.09766		63.75	-0.0351
63.8125	-0.10223		63.8125	-0.04272
63.9062	-0.10681		63.9375	-0.04272
64	-0.13123		64	-0.0351
64.1094	-0.11597		64.125	-0.02441
64.2031	-0.12817		64.25	-0.00916
64.3125	-0.13123		64.3125	0.00153
64.4062	-0.13275		64.4375	0.00916
64.5	-0.13428		64.5	0.01678
64.6094	-0.12512		64.625	0.02594
64.7031	-0.13428		64.75	0.01984
64.8125	-0.14343		64.8125	0.02594
64.9062	-0.14343		64.9375	0.02136
65	-0.13123		65	0.01373
65.1094	-0.14038		65.125	0.01526
65.2031	-0.14343		65.25	-0.00763
65.3125	-0.1297		65.3125	-0.01068
65.4062	-0.11749		65.4375	-0.01984
65.5	-0.10376		65.5	-0.01526
65.6094	-0.11749		65.625	-0.01984
65.7031	-0.12207		65.75	-0.01678
65.8125	-0.11597		65.8125	-0.01221
65.9062	-0.11597		65.9375	-0.01526
66	-0.12207		66	-0.04578
66.1094	-0.12207		66.125	-0.05035
66.2031	-0.13275		66.25	-0.05035
66.3125	-0.12207		66.3125	-0.05798
66.4062	-0.10986		66.4375	-0.05341
66.5	-0.11902		66.5	-0.0351
66.6094	-0.11139		66.625	-0.04883
66.7031	-0.11444		66.75	-0.06409
66.8125	-0.10529		66.8125	-0.05188
66.9062	-0.10681		66.9375	-0.07324
67	-0.10071		67	-0.07019
67.1094	-0.10834		67.125	-0.06256
67.2031	-0.11139		67.25	-0.08545
67.3125	-0.10376		67.3125	-0.0946
67.4062	-0.10681		67.4375	-0.09308
67.5	-0.08545		67.5	-0.11292
67.6094	-0.07172		67.625	-0.11139
67.7031	-0.07172		67.75	-0.10223
67.8125	-0.07477		67.8125	-0.09613
67.9062	-0.06866		67.9375	-0.10071
68	-0.07782		68	-0.09308
68.1094	-0.07172		68.125	-0.07477
68.2031	-0.0824		68.25	-0.0885
68.3125	-0.08545		68.3125	-0.08698
68.4062	-0.06409		68.4375	-0.07172
68.5	-0.06104		68.5	-0.07782
68.6094	-0.06256		68.625	-0.07629
68.7031	-0.05798		68.75	-0.08392
68.8125	-0.06561		68.8125	-0.08698
68.9062	-0.07019		68.9375	-0.09003
69	-0.07782		69	-0.07477
69.1094	-0.07935		69.125	-0.05798
69.2031	-0.06714		69.25	-0.06409
69.3125	-0.05493		69.3125	-0.06256
69.4062	-0.06409		69.4375	-0.06409
69.5	-0.06714		69.5	-0.0473
69.6094	-0.06409		69.625	-0.0412
69.7031	-0.05341		69.75	-0.05646
69.8125	-0.04578		69.8125	-0.05188
69.9062	-0.04272		69.9375	-0.05188
70	-0.05188		70	-0.05951
70.1094	-0.05493		70.125	-0.05951
70.2031	-0.06714		70.25	-0.07019
70.3125	-0.06561		70.3125	-0.07935
70.4062	-0.05798		70.4375	-0.07172
70.5	-0.05341		70.5	-0.08698
70.6094	-0.0473		70.625	-0.07935
70.7031	-0.05341		70.75	-0.07477
70.8125	-0.05493		70.8125	-0.0824
70.9062	-0.06561		70.9375	-0.06256
71	-0.07477		71	-0.05798
71.1094	-0.08698		71.125	-0.05035
71.2031	-0.10071		71.25	-0.05798
71.3125	-0.09308		71.3125	-0.04425
71.4062	-0.10834		71.4375	-0.03662
71.5	-0.10376		71.5	-0.02441
71.6094	-0.12207		71.625	-0.02136
71.7031	-0.12817		71.75	-0.02899
71.8125	-0.12817		71.8125	-0.02594
71.9062	-0.12207		71.9375	-0.02747
72	-0.12054		72	-0.02594
72.1094	-0.10071		72.125	-0.05188
72.2031	-0.10071		72.25	-0.05188
72.3125	-0.10071		72.3125	-0.03815
72.4062	-0.11902		72.4375	-0.05341
72.5	-0.09918		72.5	-0.05035
72.6094	-0.10071		72.625	-0.03357
72.7031	-0.09613		72.75	-0.04425
72.8125	-0.09308		72.8125	-0.05493
72.9062	-0.09766		72.9375	-0.0885
73	-0.09308		73	-0.10681
73.1094	-0.10223		73.125	-0.10529
73.2031	-0.10376		73.25	-0.11902
73.3125	-0.09766		73.3125	-0.09918
73.4062	-0.10834		73.4375	-0.11902
73.5	-0.0885		73.5	-0.1297
73.6094	-0.08392		73.625	-0.13123
73.7031	-0.08545		73.75	-0.14801
73.8125	-0.07629		73.8125	-0.14801
73.9062	-0.06561		73.9375	-0.14191
74	-0.05798		74	-0.13885
74.1094	-0.06104		74.125	-0.12817
74.2031	-0.06409		74.25	-0.12665
74.3125	-0.05646		74.3125	-0.12512
74.4062	-0.04272		74.4375	-0.12512
74.5	-0.02289		74.5	-0.12817
74.6094	-0.01526		74.625	-0.14038
74.7031	-0.01068		74.75	-0.12665
74.8125	-0.00305		74.8125	-0.12665
74.9062	0.01526		74.9375	-0.1236
75	0.01068		75	-0.12054
75.1094	0.02289		75.125	-0.11902
75.2031	0		75.25	-0.11749
75.3125	-0.00153		75.3125	-0.11139
75.4062	0.00458		75.4375	-0.09308
75.5	0.01831		75.5	-0.10223
75.6094	0.01984		75.625	-0.09155
75.7031	0.01984		75.75	-0.07324
75.8125	0.03052		75.8125	-0.05646
75.9062	0.02136		75.9375	-0.04272
76	0.00458		76	-0.02594
76.1094	-0.01068		76.125	-0.01221
76.2031	-0.01831		76.25	0.00916
76.3125	-0.02441		76.3125	0.01526
76.4062	-0.01984		76.4375	0.02594
76.5	-0.02441		76.5	0.02441
76.6094	-0.03357		76.625	0.00458
76.7031	-0.03357		76.75	0.02899
76.8125	-0.05035		76.8125	0.02594
76.9062	-0.05188		76.9375	0.01526
77	-0.05646		77	0.01831
77.1094	-0.05188		77.125	0.02594
77.2031	-0.06866		77.25	0.02136
77.3125	-0.06256		77.3125	0.00916
77.4062	-0.06256		77.4375	0.00763
77.5	-0.07324		77.5	0.02594
77.6094	-0.07629		77.625	0.01068
77.7031	-0.0885		77.75	0.00458
77.8125	-0.08698		77.8125	-0.00305
77.9062	-0.07782		77.9375	-0.00458
78	-0.08087		78	-0.01526
78.1094	-0.09308		78.125	-0.01526
78.2031	-0.08698		78.25	-0.01526
78.3125	-0.08698		78.3125	-0.00916
78.4062	-0.0824		78.4375	-0.00916
78.5	-0.0946		78.5	0.00916
78.6094	-0.10376		78.625	-0.01373
78.7031	-0.08698		78.75	-0.01984
78.8125	-0.09155		78.8125	-0.01984
78.9062	-0.08392		78.9375	-0.01221
79	-0.08698		79	-0.01373
79.1094	-0.10681		79.125	-0.02136
79.2031	-0.10071		79.25	-0.03204
79.3125	-0.09766		79.3125	-0.0412
79.4062	-0.09155		79.4375	-0.03204
79.5	-0.08392		79.5	-0.03357
79.6094	-0.08392		79.625	-0.04883
79.7031	-0.06256		79.75	-0.05188
79.8125	-0.07019		79.8125	-0.05493
79.9062	-0.06561		79.9375	-0.07477
80	-0.0824		80	-0.0824
80.1094	-0.08392		80.125	-0.08087
80.2031	-0.07019		80.25	-0.0946
80.3125	-0.07019		80.3125	-0.09003
80.4062	-0.05493		80.4375	-0.07019
80.5	-0.0473		80.5	-0.06714
80.6094	-0.04425		80.625	-0.07477
80.7031	-0.0473		80.75	-0.05493
80.8125	-0.03357		80.8125	-0.07935
80.9062	-0.03967		80.9375	-0.07172
81	-0.03052		81	-0.07782
81.1094	-0.01831		81.125	-0.08087
81.2031	-0.01678		81.25	-0.0824
81.3125	-0.01831		81.3125	-0.07019
81.4062	-0.01373		81.4375	-0.0824
81.5	-0.01678		81.5	-0.08392
81.6094	-0.00458		81.625	-0.06866
81.7031	-0.01068		81.75	-0.05188
81.8125	-0.00305		81.8125	-0.07172
81.9062	0.00153		81.9375	-0.07935
82	0.01068		82	-0.0824
82.1094	0.01068		82.125	-0.09155
82.2031	0.00916		82.25	-0.07935
82.3125	0.01068		82.3125	-0.07629
82.4062	0.01068		82.4375	-0.07324
82.5	0.01221		82.5	-0.07172
82.6094	0.01678		82.625	-0.05798
82.7031	0.02289		82.75	-0.05646
82.8125	0.02289		82.8125	-0.06256
82.9062	0.02747		82.9375	-0.05798
83	0.03357		83	-0.04272
83.1094	0.02594		83.125	-0.0473
83.2031	0.01678		83.25	-0.04425
83.3125	0.00305		83.3125	-0.02441
83.4062	-0.01221		83.4375	-0.03052
83.5	-0.01526		83.5	-0.03204
83.6094	-0.01526		83.625	-0.02289
83.7031	-0.02441		83.75	-0.01221
83.8125	-0.03662		83.8125	0
83.9062	-0.0351		83.9375	-0.00458
84	-0.04883		84	-0.00763
84.1094	-0.05493		84.125	-0.00153
84.2031	-0.05798		84.25	0.00763
84.3125	-0.05951		84.3125	0.01068
84.4062	-0.07629		84.4375	0.00763
84.5	-0.07629		84.5	0.00305
84.6094	-0.08392		84.625	-0.00916
84.7031	-0.09003		84.75	-0.01068
84.8125	-0.10529		84.8125	-0.00458
84.9062	-0.10834		84.9375	-0.01068
85	-0.10986		85	-0.01373
85.1094	-0.10986		85.125	-0.01373
85.2031	-0.10223		85.25	-0.03052
85.3125	-0.10834		85.3125	-0.0351
85.4062	-0.10529		85.4375	-0.03815
85.5	-0.1236		85.5	-0.05951
85.6094	-0.10986		85.625	-0.06104
85.7031	-0.10223		85.75	-0.07019
85.8125	-0.0824		85.8125	-0.07935
85.9062	-0.06866		85.9375	-0.07019
86	-0.06256		86	-0.08545
86.1094	-0.06561		86.125	-0.09003
86.2031	-0.06409		86.25	-0.07629
86.3125	-0.06104		86.3125	-0.09003
86.4062	-0.05951		86.4375	-0.1236
86.5	-0.0473		86.5	-0.12665
86.6094	-0.06104		86.625	-0.13275
86.7031	-0.06561		86.75	-0.13885
86.8125	-0.07477		86.8125	-0.13275
86.9062	-0.07782		86.9375	-0.14496
87	-0.07172		87	-0.14801
87.1094	-0.07935		87.125	-0.13885
87.2031	-0.06714		87.25	-0.13123
87.3125	-0.07324		87.3125	-0.14496
87.4062	-0.06561		87.4375	-0.13733
87.5	-0.07629		87.5	-0.1236
87.6094	-0.07019		87.625	-0.10681
87.7031	-0.06256		87.75	-0.09918
87.8125	-0.06409		87.8125	-0.11139
87.9062	-0.05493		87.9375	-0.10071
88	-0.06409		88	-0.10376
88.1094	-0.06866		88.125	-0.09308
88.2031	-0.07782		88.25	-0.0824
88.3125	-0.07172		88.3125	-0.07935
88.4062	-0.05646		88.4375	-0.07629
88.5	-0.05493		88.5	-0.06256
88.6094	-0.05341		88.625	-0.07019
88.7031	-0.05493		88.75	-0.07935
88.8125	-0.06409		88.8125	-0.07477
88.9062	-0.06866		88.9375	-0.08545
89	-0.07172		89	-0.0885
89.1094	-0.06561		89.125	-0.0885
89.2031	-0.06561		89.25	-0.08087
89.3125	-0.06409		89.3125	-0.05798
89.4062	-0.06104		89.4375	-0.05493
89.5	-0.06866		89.5	-0.05646
89.6094	-0.06561		89.625	-0.07019
89.7031	-0.06409		89.75	-0.06104
89.8125	-0.05341		89.8125	-0.04883
89.9062	-0.05188		89.9375	-0.06104
90	-0.05646		90	-0.06561
90.1094	-0.05646		90.125	-0.05188
90.2031	-0.06104		90.25	-0.06104
90.3125	-0.07477		90.3125	-0.07019
90.4062	-0.09155		90.4375	-0.05951
90.5	-0.08087		90.5	-0.05188
90.6094	-0.09155		90.625	-0.05493
90.7031	-0.09308		90.75	-0.04578
90.8125	-0.09766		90.8125	-0.04272
90.9062	-0.10223		90.9375	-0.04883
91	-0.09766		91	-0.04425
91.1094	-0.0824		91.125	-0.04425
91.2031	-0.0946		91.25	-0.03815
91.3125	-0.10834		91.3125	-0.0351
91.4062	-0.09308		91.4375	-0.05341
91.5	-0.09766		91.5	-0.04425
91.6094	-0.10071		91.625	-0.05951
91.7031	-0.09308		91.75	-0.05341
91.8125	-0.10529		91.8125	-0.04272
91.9062	-0.10681		91.9375	-0.02441
92	-0.11902		92	-0.01526
92.1094	-0.11292		92.125	-0.01678
92.2031	-0.10986		92.25	-0.03662
92.3125	-0.10834		92.3125	-0.04883
92.4062	-0.11292		92.4375	-0.04883
92.5	-0.09003		92.5	-0.05951
92.6094	-0.09155		92.625	-0.05493
92.7031	-0.11749		92.75	-0.06409
92.8125	-0.12207		92.8125	-0.07935
92.9062	-0.12054		92.9375	-0.07324
93	-0.10071		93	-0.05798
93.1094	-0.0946		93.125	-0.05798
93.2031	-0.09613		93.25	-0.07172
93.3125	-0.09918		93.3125	-0.06561
93.4062	-0.07629		93.4375	-0.07629
93.5	-0.06256		93.5	-0.08392
93.6094	-0.05188		93.625	-0.10071
93.7031	-0.04578		93.75	-0.09918
93.8125	-0.0473		93.8125	-0.11292
93.9062	-0.02747		93.9375	-0.11139
94	-0.01678		94	-0.10986
94.1094	-0.02441		94.125	-0.11597
94.2031	-0.01526		94.25	-0.09613
94.3125	-0.01373		94.3125	-0.10834
94.4062	-0.01373		94.4375	-0.11749
94.5	-0.02594		94.5	-0.10529
94.6094	-0.01984		94.625	-0.12054
94.7031	-0.02441		94.75	-0.13428
94.8125	-0.01221		94.8125	-0.13428
94.9062	-0.01526		94.9375	-0.1358
95	-0.01373		95	-0.13123
95.1094	-0.01373		95.125	-0.10834
95.2031	0.00153		95.25	-0.10529
95.3125	-0.0061		95.3125	-0.08392
95.4062	-0.01678		95.4375	-0.08087
95.5	-0.01678		95.5	-0.0946
95.6094	-0.03357		95.625	-0.0824
95.7031	-0.0351		95.75	-0.06409
95.8125	-0.04883		95.8125	-0.06714
95.9062	-0.0473		95.9375	-0.04883
96	-0.04578		96	-0.04578
96.1094	-0.05341		96.125	-0.0412
96.2031	-0.05951		96.25	-0.02441
96.3125	-0.06104		96.3125	-0.02747
96.4062	-0.06104		96.4375	-0.02594
96.5	-0.06561		96.5	-0.03052
96.6094	-0.07477		96.625	-0.01221
96.7031	-0.07782		96.75	-0.0061
96.8125	-0.07324		96.8125	-0.00305
96.9062	-0.07324		96.9375	0.00153
97	-0.07935		97	0.01373
97.1094	-0.06409		97.125	0.01984
97.2031	-0.06866		97.25	0.00763
97.3125	-0.07324		97.3125	0.00458
97.4062	-0.06256		97.4375	0.0061
97.5	-0.06714		97.5	0.00305
97.6094	-0.06561		97.625	0.01373
97.7031	-0.06409		97.75	0.01373
97.8125	-0.07477		97.8125	-0.01068
97.9062	-0.07782		97.9375	-0.00763
98	-0.08545		98	-0.00916
98.1094	-0.09003		98.125	-0.00305
98.2031	-0.09155		98.25	0.00916
98.3125	-0.10071		98.3125	0.00763
98.4062	-0.0946		98.4375	-0.00763
98.5	-0.10681		98.5	-0.02136
98.6094	-0.11444		98.625	-0.01678
98.7031	-0.10986		98.75	-0.02136
98.8125	-0.10071		98.8125	-0.01678
98.9062	-0.10223		98.9375	-0.03357
99	-0.11292		99	-0.04272
99.1094	-0.09918		99.125	-0.04272
99.2031	-0.10071		99.25	-0.04578
99.3125	-0.10529		99.3125	-0.06104
99.4062	-0.11902		99.4375	-0.05035
99.5	-0.11749		99.5	-0.03357
99.6094	-0.11597		99.625	-0.03357
99.7031	-0.11902		99.75	-0.07172
99.8125	-0.10681		99.8125	-0.08087
99.9062	-0.0946		99.9375	-0.07324
100	-0.08698		100	-0.07324
100.109	-0.0946		100.125	-0.06104
100.203	-0.08545		100.25	-0.05951
100.312	-0.07629		100.312	-0.08087
100.406	-0.0946		100.438	-0.07324
100.5	-0.08392		100.5	-0.07629
100.609	-0.07019		100.625	-0.05798
100.703	-0.06561		100.75	-0.06256
100.812	-0.04883		100.812	-0.08392
100.906	-0.04883		100.938	-0.07782
101	-0.04578		101	-0.07324
101.109	-0.0473		101.125	-0.07782
101.203	-0.05493		101.25	-0.07324
101.312	-0.05798		101.312	-0.05951
101.406	-0.0473		101.438	-0.04272
101.5	-0.03967		101.5	-0.06714
101.609	-0.04578		101.625	-0.06409
101.703	-0.03052		101.75	-0.06409
101.812	-0.03815		101.812	-0.07019
101.906	-0.03662		101.938	-0.05951
102	-0.02747		102	-0.0412
102.109	-0.03662		102.125	-0.05035
102.203	-0.02594		102.25	-0.05035
102.312	-0.02747		102.312	-0.04883
102.406	-0.03204		102.438	-0.04272
102.5	-0.03357		102.5	-0.03662
102.609	-0.02441		102.625	-0.0351
102.703	-0.02747		102.75	-0.02136
102.812	-0.0061		102.812	-0.02136
102.906	-0.01831		102.938	-0.02289
103	-0.01221		103	-0.01984
103.109	-0.01221		103.125	-0.01373
103.203	-0.02289		103.25	-0.02594
103.312	-0.03052		103.312	-0.01831
103.406	-0.04272		103.438	-0.03967
103.5	-0.0473		103.5	-0.03815
103.609	-0.04883		103.625	-0.05188
103.703	-0.05341		103.75	-0.04425
103.812	-0.06256		103.812	-0.02441
103.906	-0.05798		103.938	-0.02136
104	-0.05646		104	-0.02747
104.109	-0.06104		104.125	-0.03204
104.203	-0.07324		104.25	-0.03815
104.312	-0.07477		104.312	-0.03052
104.406	-0.0946		104.438	-0.01984
104.5	-0.10529		104.5	-0.01068
104.609	-0.10529		104.625	-0.02747
104.703	-0.12207		104.75	-0.03204
104.812	-0.12817		104.812	-0.04425
104.906	-0.12054		104.938	-0.04425
105	-0.12512		105	-0.0351
105.109	-0.12054		105.125	-0.03052
105.203	-0.11902		105.25	-0.04425
105.312	-0.10223		105.312	-0.05035
105.406	-0.11444		105.438	-0.06409
105.5	-0.10529		105.5	-0.05951
105.609	-0.10529		105.625	-0.05798
105.703	-0.10071		105.75	-0.06104
105.812	-0.10376		105.812	-0.07935
105.906	-0.11139		105.938	-0.0824
106	-0.11597		106	-0.10071
106.109	-0.11749		106.125	-0.09918
106.203	-0.09766		106.25	-0.09308
106.312	-0.09613		106.312	-0.09308
106.406	-0.09308		106.438	-0.10223
106.5	-0.10529		106.5	-0.10986
106.609	-0.0946		106.625	-0.11597
106.703	-0.09613		106.75	-0.11444
106.812	-0.09766		106.812	-0.11444
106.906	-0.08392		106.938	-0.10986
107	-0.0824		107	-0.12512
107.109	-0.07324		107.125	-0.11749
107.203	-0.07172		107.25	-0.11749
107.312	-0.06104		107.312	-0.12665
107.406	-0.07172		107.438	-0.10223
107.5	-0.0824		107.5	-0.09613
107.609	-0.07782		107.625	-0.10986
107.703	-0.07324		107.75	-0.09155
107.812	-0.06256		107.812	-0.0824
107.906	-0.05798		107.938	-0.07477
108	-0.04883		108	-0.05341
108.109	-0.06561		108.125	-0.05035
108.203	-0.06256		108.25	-0.06256
108.312	-0.06104		108.312	-0.06104
108.406	-0.05646		108.438	-0.07019
108.5	-0.05493		108.5	-0.07324
108.609	-0.04272		108.625	-0.06866
108.703	-0.04272		108.75	-0.05798
108.812	-0.05646		108.812	-0.04578
108.906	-0.06409		108.938	-0.04425
109	-0.05798		109	-0.05646
109.109	-0.05341		109.125	-0.05035
109.203	-0.04425		109.25	-0.06104
109.312	-0.0351		109.312	-0.04883
109.406	-0.04272		109.438	-0.05798
109.5	-0.05646		109.5	-0.07782
109.609	-0.06104		109.625	-0.07477
109.703	-0.06866		109.75	-0.06561
109.812	-0.07019		109.812	-0.06104
109.906	-0.0824		109.938	-0.0351
110	-0.07019		110	-0.04425
110.109	-0.08698		110.125	-0.04272
110.203	-0.07629		110.25	-0.04425
110.312	-0.07629		110.312	-0.05188
110.406	-0.08087		110.438	-0.06866
110.5	-0.08545		110.5	-0.04272
110.609	-0.08392		110.625	-0.05798
110.703	-0.0885		110.75	-0.06104
110.812	-0.10071		110.812	-0.07782
110.906	-0.07935		110.938	-0.07172
111	-0.08545		111	-0.06104
111.109	-0.09155		111.125	-0.05188
111.203	-0.08392		111.25	-0.05646
111.312	-0.10071		111.312	-0.06561
111.406	-0.10986		111.438	-0.06866
111.5	-0.11597		111.5	-0.04883
111.609	-0.11749		111.625	-0.0351
111.703	-0.14038		111.75	-0.04272
111.812	-0.15106		111.812	-0.04883
111.906	-0.15564		111.938	-0.0473
112	-0.15717		112	-0.06104
112.109	-0.16174		112.125	-0.06256
112.203	-0.16327		112.25	-0.06866
112.312	-0.16174		112.312	-0.05951
112.406	-0.15869		112.438	-0.05798
112.5	-0.15106		112.5	-0.04883
112.609	-0.16022		112.625	-0.07935
112.703	-0.14343		112.75	-0.08698
112.812	-0.14648		112.812	-0.09308
112.906	-0.14496		112.938	-0.0824
113	-0.14648		113	-0.08392
113.109	-0.12817		113.125	-0.09155
113.203	-0.13123		113.25	-0.08698
113.312	-0.1236		113.312	-0.11597
113.406	-0.10681		113.438	-0.10529
113.5	-0.09918		113.5	-0.10529
113.609	-0.0885		113.625	-0.11292
113.703	-0.07019		113.75	-0.11597
113.812	-0.07172		113.812	-0.1236
113.906	-0.06714		113.938	-0.12665
114	-0.05035		114	-0.12665
114.109	-0.04578		114.125	-0.12054
114.203	-0.04272		114.25	-0.1297
114.312	-0.04578		114.312	-0.1297
114.406	-0.03662		114.438	-0.13885
114.5	-0.02594		114.5	-0.12512
114.609	-0.02289		114.625	-0.14191
114.703	-0.00305		114.75	-0.15717
114.812	0.00458		114.812	-0.15564
114.906	0.00458		114.938	-0.15869
115	-0.00458		115	-0.1709
115.109	-0.00763		115.125	-0.15717
115.203	-0.01678		115.25	-0.14954
115.312	-0.01373		115.312	-0.14954
115.406	-0.02594		115.438	-0.14038
115.5	-0.01984		115.5	-0.13275
115.609	-0.02136		115.625	-0.11597
115.703	-0.00458		115.75	-0.11139
115.812	-0.00458		115.812	-0.10376
115.906	0		115.938	-0.09766
116	-0.00305		116	-0.0885
116.109	0.0061		116.125	-0.06866
116.203	-0.00458		116.25	-0.05493
116.312	0.00305		116.312	-0.0412
116.406	-0.00305		116.438	-0.05341
116.5	-0.00305		116.5	-0.03662
116.609	-0.01373		116.625	-0.03204
116.703	-0.00458		116.75	-0.0351
116.812	-0.00458		116.812	-0.02899
116.906	-0.01373		116.938	-0.03662
117	-0.00763		117	-0.03815
117.109	-0.01678		117.125	-0.01984
117.203	-0.01831		117.25	-0.01678
117.312	-0.02899		117.312	-0.03357
117.406	-0.03052		117.438	-0.01526
117.5	-0.0412		117.5	-0.03662
117.609	-0.04425		117.625	-0.04578
117.703	-0.04883		117.75	-0.02594
117.812	-0.0412		117.812	-0.03357
117.906	-0.05188		117.938	-0.01831
118	-0.05798		118	-0.01221
118.109	-0.06104		118.125	-0.01373
118.203	-0.07172		118.25	-0.01831
118.312	-0.05646		118.312	-0.01831
118.406	-0.05646		118.438	-0.02441
118.5	-0.05951		118.5	-0.02899
118.609	-0.05035		118.625	-0.03967
118.703	-0.04578		118.75	-0.0351
118.812	-0.04272		118.812	-0.02899
118.906	-0.0473		118.938	-0.05493
119	-0.03662		119	-0.04883
119.109	-0.02289		119.125	-0.06561
119.203	-0.03052		119.25	-0.06561
119.312	-0.03662		119.312	-0.07172
119.406	-0.0473		119.438	-0.0824
119.5	-0.05188		119.5	-0.0885
119.609	-0.05188		119.625	-0.07477
119.703	-0.05646		119.75	-0.08087
119.812	-0.05951		119.812	-0.07935
119.906	-0.06561		119.938	-0.04883
120	-0.07019		120	-0.06714
120.109	-0.07019		120.125	-0.07935
120.203	-0.06866		120.25	-0.06866
120.312	-0.06714		120.312	-0.07172
120.406	-0.04883		120.438	-0.0885
120.5	-0.05188		120.5	-0.08392
120.609	-0.05188		120.625	-0.07935
120.703	-0.06104		120.75	-0.09308
120.812	-0.05798		120.812	-0.07019
120.906	-0.06561		120.938	-0.06866
121	-0.06256		121	-0.07019
121.109	-0.07477		121.125	-0.06561
121.203	-0.05951		121.25	-0.06714
121.312	-0.04578		121.312	-0.07019
121.406	-0.02747		121.438	-0.08087
121.5	-0.03204		121.5	-0.07782
121.609	-0.02289		121.625	-0.0946
121.703	0.0061		121.75	-0.06256
121.812	0.00916		121.812	-0.09003
121.906	0.02136		121.938	-0.0824
122	0.0061		122	-0.09155
122.109	0.00458		122.125	-0.09003
122.203	0.01068		122.25	-0.0824
122.312	0.00458		122.312	-0.07477
122.406	0		122.438	-0.07477
122.5	0.00763		122.5	-0.05188
122.609	0.00153		122.625	-0.06561
122.703	-0.01984		122.75	-0.07019
122.812	-0.00916		122.812	-0.05035
122.906	-0.00153		122.938	-0.05035
123	0.00153		123	-0.04883
123.109	-0.01221		123.125	-0.03357
123.203	-0.01373		123.25	-0.07172
123.312	-0.03204		123.312	-0.03357
123.406	-0.0412		123.438	-0.04272
123.5	-0.0473		123.5	-0.03967
123.609	-0.06104		123.625	-0.02899
123.703	-0.07477		123.75	-0.03662
123.812	-0.08698		123.812	-0.0412
123.906	-0.09613		123.938	-0.02441
124	-0.09918		124	-0.01221
124.109	-0.09918		124.125	0.00153
124.203	-0.10376		124.25	-0.00305
124.312	-0.10223		124.312	0
124.406	-0.09613		124.438	0.00305
124.5	-0.09003		124.5	0
124.609	-0.10223		124.625	-0.00458
124.703	-0.11292		124.75	-0.02136
124.812	-0.10223		124.812	-0.02594
124.906	-0.11292		124.938	-0.01678
125	-0.1236		125	-0.03052
125.109	-0.12817		125.125	-0.03052
125.203	-0.12054		125.25	-0.03052
125.312	-0.1236		125.312	-0.04272
125.406	-0.11444		125.438	-0.06714
125.5	-0.1236		125.5	-0.05341
125.609	-0.1297		125.625	-0.06104
125.703	-0.13428		125.75	-0.07324
125.812	-0.12054		125.812	-0.07477
125.906	-0.09918		125.938	-0.06561
126	-0.10071		126	-0.07172
126.109	-0.10681		126.125	-0.07477
126.203	-0.10986		126.25	-0.07019
126.312	-0.10223		126.312	-0.08087
126.406	-0.10223		126.438	-0.09155
126.5	-0.10071		126.5	-0.08698
126.609	-0.08698		126.625	-0.09155
126.703	-0.07019		126.75	-0.10834
126.812	-0.06409		126.812	-0.10986
126.906	-0.06409		126.938	-0.12512
127	-0.06561		127	-0.1297
127.109	-0.06714		127.125	-0.11749
127.203	-0.06409		127.25	-0.12207
127.312	-0.06866		127.312	-0.13123
127.406	-0.07019		127.438	-0.11597
127.5	-0.05646		127.5	-0.10529
127.609	-0.06256		127.625	-0.09308
127.703	-0.05341		127.75	-0.09613
127.812	-0.05035		127.812	-0.08698
127.906	-0.05493		127.938	-0.09155
128	-0.05646		128	-0.08087
128.109	-0.04883		128.125	-0.08392
128.203	-0.05951		128.25	-0.08392
128.312	-0.05951		128.312	-0.08698
128.406	-0.05035		128.438	-0.07782
128.5	-0.06256		128.5	-0.09613
128.609	-0.0473		128.625	-0.09613
128.703	-0.05493		128.75	-0.0946
128.812	-0.04578		128.812	-0.09155
128.906	-0.05341		128.938	-0.08087
129	-0.05188		129	-0.08545
129.109	-0.05493		129.125	-0.07782
129.203	-0.0412		129.25	-0.08698
129.312	-0.05188		129.312	-0.08392
129.406	-0.0473		129.438	-0.08087
129.5	-0.0473		129.5	-0.07629
129.609	-0.04425		129.625	-0.0824
129.703	-0.03052		129.75	-0.07172
129.812	-0.02594		129.812	-0.07477
129.906	-0.03052		129.938	-0.06256
130	-0.02441		130	-0.05035
130.109	-0.01984		130.125	-0.0473
130.203	-0.02747		130.25	-0.02747
130.312	-0.03204		130.312	-0.02289
130.406	-0.03052		130.438	-0.00916
130.5	-0.03967		130.5	-0.01831
130.609	-0.04425		130.625	-0.01678
130.703	-0.05341		130.75	-0.01526
130.812	-0.05493		130.812	-0.0351
130.906	-0.0473		130.938	-0.03662
131	-0.05646		131	-0.05951
131.109	-0.06714		131.125	-0.05493
131.203	-0.0885		131.25	-0.04425
131.312	-0.09613		131.312	-0.03967
131.406	-0.11749		131.438	-0.03815
131.5	-0.13123		131.5	-0.04578
131.609	-0.13275		131.625	-0.06104
131.703	-0.13885		131.75	-0.04883
131.812	-0.13275		131.812	-0.05493
131.906	-0.12817		131.938	-0.06104
132	-0.11902		132	-0.06256
132.109	-0.11292		132.125	-0.07477
132.203	-0.12512		132.25	-0.07477
132.312	-0.11597		132.312	-0.0946
132.406	-0.11444		132.438	-0.08392
132.5	-0.12207		132.5	-0.08392
132.609	-0.12054		132.625	-0.07629
132.703	-0.11902		132.75	-0.07629
132.812	-0.11749		132.812	-0.07019
132.906	-0.1236		132.938	-0.06409
133	-0.13123		133	-0.08087
133.109	-0.13123		133.125	-0.08545
133.203	-0.12817		133.25	-0.09003
133.312	-0.11902		133.312	-0.08392
133.406	-0.11902		133.438	-0.08392
133.5	-0.11902		133.5	-0.06409
133.609	-0.10986		133.625	-0.08545
133.703	-0.10223		133.75	-0.07629
133.812	-0.09155		133.812	-0.07629
133.906	-0.08392		133.938	-0.07935
134	-0.06714		134	-0.08087
134.109	-0.06409		134.125	-0.09766
134.203	-0.05493		134.25	-0.08087
134.312	-0.05035		134.312	-0.07019
134.406	-0.02594		134.438	-0.0946
134.5	-0.03357		134.5	-0.10223
134.609	-0.02899		134.625	-0.09155
134.703	-0.03204		134.75	-0.09308
134.812	-0.02136		134.812	-0.09155
134.906	-0.01678		134.938	-0.0946
135	-0.02594		135	-0.09766
135.109	-0.01526		135.125	-0.07172
135.203	-0.02747		135.25	-0.08087
135.312	-0.02289		135.312	-0.07935
135.406	-0.02289		135.438	-0.06866
135.5	-0.01068		135.5	-0.06714
135.609	-0.01373		135.625	-0.07172
135.703	-0.01526		135.75	-0.05493
135.812	-0.01373		135.812	-0.0473
135.906	-0.02899		135.938	-0.04883
136	-0.0351		136	-0.04578
136.109	-0.02136		136.125	-0.03967
136.203	-0.01984		136.25	-0.02441
136.312	-0.02289		136.312	-0.02441
136.406	-0.02289		136.438	-0.02136
136.5	-0.02594		136.5	0.00153
136.609	-0.02899		136.625	0.00916
136.703	-0.03662		136.75	0.00916
136.812	-0.04883		136.812	0.01526
136.906	-0.05646		136.938	0.03052
137	-0.05951		137	0.00153
137.109	-0.06866		137.125	0.03204
137.203	-0.06561		137.25	0.03204
137.312	-0.05646		137.312	0.01373
137.406	-0.06256		137.438	0.01831
137.5	-0.07019		137.5	0.01984
137.609	-0.0824		137.625	0.00153
137.703	-0.06866		137.75	0.01221
137.812	-0.06104		137.812	0.00458
137.906	-0.08392		137.938	-0.00458
138	-0.0824		138	0.0061
138.109	-0.08545		138.125	0.00305
138.203	-0.07782		138.25	0.00305
138.312	-0.06866		138.312	0.01221
138.406	-0.06714		138.438	-0.0061
138.5	-0.09003		138.5	-0.01373
138.609	-0.09155		138.625	-0.01678
138.703	-0.08698		138.75	-0.02136
138.812	-0.09766		138.812	-0.03357
138.906	-0.09918		138.938	-0.03967
139	-0.09003		139	-0.04578
139.109	-0.07629		139.125	-0.02899
139.203	-0.05951		139.25	-0.03815
139.312	-0.05951		139.312	-0.03204
139.406	-0.07629		139.438	-0.0351
139.5	-0.07172		139.5	-0.05493
139.609	-0.08698		139.625	-0.0473
139.703	-0.0824		139.75	-0.04425
139.812	-0.07477		139.812	-0.05188
139.906	-0.0885		139.938	-0.05493
140	-0.07172		140	-0.0473
140.109	-0.0824		140.125	-0.07477
140.203	-0.08087		140.25	-0.06714
140.312	-0.08392		140.312	-0.07019
140.406	-0.07782		140.438	-0.0885
140.5	-0.08087		140.5	-0.08545
140.609	-0.07477		140.625	-0.08392
140.703	-0.07019		140.75	-0.07629
140.812	-0.06866		140.812	-0.07629
140.906	-0.05646		140.938	-0.06866
141	-0.0473		141	-0.06714
141.109	-0.05035		141.125	-0.06714
141.203	-0.04883		141.25	-0.08698
141.312	-0.04578		141.312	-0.0885
141.406	-0.04883		141.438	-0.08087
141.5	-0.05188		141.5	-0.09308
141.609	-0.03204		141.625	-0.07629
141.703	-0.02289		141.75	-0.0824
141.812	-0.01526		141.812	-0.0824
141.906	-0.01221		141.938	-0.09308
142	-0.01526		142	-0.07629
142.109	-0.02594		142.125	-0.07629
142.203	-0.02289		142.25	-0.07324
142.312	-0.03052		142.312	-0.06104
142.406	-0.01678		142.438	-0.07477
142.5	-0.01831		142.5	-0.05951
142.609	-0.02441		142.625	-0.05493
142.703	-0.01984		142.75	-0.05035
142.812	-0.03204		142.812	-0.02136
142.906	-0.02136		142.938	-0.01068
143	-0.03357		143	-0.02747
143.109	-0.0351		143.125	-0.00916
143.203	-0.04425		143.25	-0.01068
143.312	-0.03815		143.312	-0.02441
143.406	-0.04883		143.438	-0.01831
143.5	-0.04272		143.5	-0.04272
143.609	-0.04425		143.625	-0.03052
143.703	-0.07324		143.75	0.00153
143.812	-0.07324		143.812	0.0061
143.906	-0.08392		143.938	0.00153
144	-0.0824		144	0
144.109	-0.10529		144.125	0.00916
144.203	-0.10223		144.25	0.01373
144.312	-0.09766		144.312	0.00153
144.406	-0.10223		144.438	0
144.5	-0.10834		144.5	0.01831
144.609	-0.12512		144.625	0.00305
144.703	-0.13123		144.75	0.01068
144.812	-0.13885		144.812	0.01984
144.906	-0.13733		144.938	-0.00305
145	-0.13428		145	0.00763
145.109	-0.14648		145.125	-0.0061
145.203	-0.14038		145.25	-0.01221
145.312	-0.13275		145.312	-0.02136
145.406	-0.1236		145.438	-0.02899
145.5	-0.12512		145.5	-0.0351
145.609	-0.11749		145.625	-0.04883
145.703	-0.11139		145.75	-0.04578
145.812	-0.10681		145.812	-0.05493
145.906	-0.10986		145.938	-0.05646
146	-0.10986		146	-0.07324
146.109	-0.11292		146.125	-0.05646
146.203	-0.11444		146.25	-0.07477
146.312	-0.10681		146.312	-0.09155
146.406	-0.09613		146.438	-0.08698
146.5	-0.09766		146.5	-0.10529
146.609	-0.10834		146.625	-0.0946
146.703	-0.09308		146.75	-0.0946
146.812	-0.09918		146.812	-0.10223
146.906	-0.09308		146.938	-0.11597
147	-0.09003		147	-0.11749
147.109	-0.09613		147.125	-0.11902
147.203	-0.09308		147.25	-0.12207
147.312	-0.0885		147.312	-0.12817
147.406	-0.09613		147.438	-0.1236
147.5	-0.08698		147.5	-0.13885
147.609	-0.07782		147.625	-0.14496
147.703	-0.07019		147.75	-0.12665
147.812	-0.06256		147.812	-0.14191
147.906	-0.05188		147.938	-0.13885
148	-0.07019		148	-0.14496
148.109	-0.06409		148.125	-0.13428
148.203	-0.06104		148.25	-0.11597
148.312	-0.06256		148.312	-0.11139
148.406	-0.07629		148.438	-0.09613
148.5	-0.07782		148.5	-0.11292
148.609	-0.05951		148.625	-0.10834
148.703	-0.04272		148.75	-0.11749
148.812	-0.05493		148.812	-0.10529
148.906	-0.06714		148.938	-0.09308
149	-0.06256		149	-0.0824
149.109	-0.07782		149.125	-0.0885
149.203	-0.06866		149.25	-0.0946
149.312	-0.06866		149.312	-0.09613
149.406	-0.07782		149.438	-0.0885
149.5	-0.07019		149.5	-0.08545
149.609	-0.06256		149.625	-0.07935
149.703	-0.07172		149.75	-0.07019
149.812	-0.07782		149.812	-0.07324
149.906	-0.06409		149.938	-0.05798
150	-0.05798		150	-0.05493
150.109	-0.05341		150.125	-0.07477
150.203	-0.06561		150.25	-0.05951
150.312	-0.06866		150.312	-0.05798
150.406	-0.07172		150.438	-0.04425
150.5	-0.07172		150.5	-0.0351
150.609	-0.07477		150.625	-0.01526
150.703	-0.0885		150.75	-0.02747
150.812	-0.09003		150.812	-0.01831
150.906	-0.10071		150.938	-0.00916
151	-0.09918		151	-0.01984
151.109	-0.10529		151.125	-0.00458
151.203	-0.11444		151.25	0
151.312	-0.12512		151.312	-0.00916
151.406	-0.13428		151.438	-0.01984
151.5	-0.13428		151.5	-0.02289
151.609	-0.13428		151.625	-0.01984
151.703	-0.1236		151.75	-0.01831
151.812	-0.13428		151.812	-0.01221
151.906	-0.14191		151.938	-0.02289
152	-0.15106		152	-0.03204
152.109	-0.14954		152.125	-0.01831
152.203	-0.15717		152.25	-0.01984
152.312	-0.16174		152.312	-0.04578
152.406	-0.15564		152.438	-0.04883
152.5	-0.14648		152.5	-0.04425
152.609	-0.15869		152.625	-0.06561
152.703	-0.16327		152.75	-0.05798
152.812	-0.16632		152.812	-0.0351
152.906	-0.16479		152.938	-0.04272
153	-0.1358		153	-0.07019
153.109	-0.1358		153.125	-0.06104
153.203	-0.13885		153.25	-0.06104
153.312	-0.12665		153.312	-0.07477
153.406	-0.12054		153.438	-0.07019
153.5	-0.10986		153.5	-0.10529
153.609	-0.10376		153.625	-0.10376
153.703	-0.08698		153.75	-0.0885
153.812	-0.09308		153.812	-0.09918
153.906	-0.08087		153.938	-0.0946
154	-0.06256		154	-0.11444
154.109	-0.05951		154.125	-0.10834
154.203	-0.0473		154.25	-0.11292
154.312	-0.04425		154.312	-0.10529
154.406	-0.03815		154.438	-0.10529
154.5	-0.0351		154.5	-0.11139
154.609	-0.04425		154.625	-0.10529
154.703	-0.04578		154.75	-0.10223
154.812	-0.04883		154.812	-0.10071
154.906	-0.03052		154.938	-0.09918
155	-0.02594		155	-0.09308
155.109	-0.03662		155.125	-0.08087
155.203	-0.02899		155.25	-0.07629
155.312	-0.02289		155.312	-0.0824
155.406	-0.01526		155.438	-0.08392
155.5	-0.00305		155.5	-0.07324
155.609	-0.00916		155.625	-0.05951
155.703	0.00153		155.75	-0.04578
155.812	0.0061		155.812	-0.02594
155.906	0.00763		155.938	-0.01831
156	0		156	-0.02136
156.109	0.00763		156.125	-0.02136
156.203	-0.0061		156.25	-0.02136
156.312	0		156.312	-0.0061
156.406	0.00305		156.438	0
156.5	-0.01068		156.5	-0.01678
156.609	-0.01678		156.625	0.00305
156.703	-0.02594		156.75	-0.01068
156.812	-0.02594		156.812	-0.00305
156.906	-0.0473		156.938	-0.0061
157	-0.0412		157	-0.01678
157.109	-0.05493		157.125	-0.01068
157.203	-0.05035		157.25	-0.00153
157.312	-0.05646		157.312	-0.00305
157.406	-0.05341		157.438	0.00763
157.5	-0.03815		157.5	-0.00153
157.609	-0.04883		157.625	-0.0061
157.703	-0.04425		157.75	0.00305
157.812	-0.03204		157.812	-0.00153
157.906	-0.03967		157.938	-0.0061
158	-0.06561		158	0.00458
158.109	-0.06256		158.125	0
158.203	-0.06409		158.25	0.00153
158.312	-0.05493		158.312	-0.00305
158.406	-0.05188		158.438	0.0061
158.5	-0.04578		158.5	0.00305
158.609	-0.05035		158.625	-0.00153
158.703	-0.05035		158.75	-0.01526
158.812	-0.06561		158.812	-0.00763
158.906	-0.07019		158.938	-0.00763
159	-0.07172		159	-0.02594
159.109	-0.08392		159.125	-0.03967
159.203	-0.07935		159.25	-0.0412
159.312	-0.07935		159.312	-0.05646
159.406	-0.07172		159.438	-0.05188
159.5	-0.07172		159.5	-0.03052
159.609	-0.06866		159.625	-0.02747
159.703	-0.05798		159.75	-0.02594
159.812	-0.05188		159.812	-0.03204
159.906	-0.05341		159.938	-0.0412
160	-0.04578		160	-0.04425
160.109	-0.04272		160.125	-0.05798
160.203	-0.05341		160.25	-0.04883
160.312	-0.04883		160.312	-0.03967
160.406	-0.05035		160.438	-0.0473
160.5	-0.05646		160.5	-0.05188
160.609	-0.04578		160.625	-0.02747
160.703	-0.0412		160.75	-0.0473
160.812	-0.0473		160.812	-0.06409
160.906	-0.05341		160.938	-0.06409
161	-0.04578		161	-0.09003
161.109	-0.05188		161.125	-0.07629
161.203	-0.04272		161.25	-0.06714
161.312	-0.02594		161.312	-0.08392
161.406	-0.0351		161.438	-0.0824
161.5	-0.01373		161.5	-0.06409
161.609	0.00153		161.625	-0.06561
161.703	0.00305		161.75	-0.06866
161.812	-0.00305		161.812	-0.06256
161.906	-0.00763		161.938	-0.07172
162	0.00916		162	-0.0885
162.109	0.00153		162.125	-0.08392
162.203	-0.00458		162.25	-0.07935
162.312	-0.0061		162.312	-0.08392
162.406	-0.01221		162.438	-0.0885
162.5	-0.01678		162.5	-0.09003
162.609	-0.01831		162.625	-0.08087
162.703	-0.01831		162.75	-0.07019
162.812	-0.00763		162.812	-0.05951
162.906	-0.02441		162.938	-0.04883
163	-0.03204		163	-0.0473
163.109	-0.04425		163.125	-0.02441
163.203	-0.05035		163.25	-0.03815
163.312	-0.05798		163.312	-0.02594
163.406	-0.05646		163.438	-0.0351
163.5	-0.06104		163.5	-0.03967
163.609	-0.05188		163.625	-0.03052
163.703	-0.05951		163.75	-0.02289
163.812	-0.06561		163.812	-0.02594
163.906	-0.06409		163.938	-0.01526
164	-0.06409		164	-0.00458
164.109	-0.07629		164.125	-0.01678
164.203	-0.07629		164.25	0
164.312	-0.07782		164.312	-0.00305
164.406	-0.08698		164.438	0
164.5	-0.0885		164.5	-0.00305
164.609	-0.0946		164.625	-0.01373
164.703	-0.09613		164.75	-0.0061
164.812	-0.09155		164.812	-0.00458
164.906	-0.10071		164.938	-0.00916
165	-0.10071		165	-0.01068
165.109	-0.09918		165.125	-0.01526
165.203	-0.11292		165.25	-0.02441
165.312	-0.10223		165.312	-0.02747
165.406	-0.12054		165.438	-0.02747
165.5	-0.11292		165.5	-0.04578
165.609	-0.11597		165.625	-0.05951
165.703	-0.10834		165.75	-0.05188
165.812	-0.09766		165.812	-0.04883
165.906	-0.10681		165.938	-0.05341
166	-0.11597		166	-0.06714
166.109	-0.1236		166.125	-0.06256
166.203	-0.10376		166.25	-0.03967
166.312	-0.10223		166.312	-0.06866
166.406	-0.09918		166.438	-0.07629
166.5	-0.09613		166.5	-0.10529
166.609	-0.0824		166.625	-0.10834
166.703	-0.06866		166.75	-0.11139
166.812	-0.06866		166.812	-0.10071
166.906	-0.06409		166.938	-0.10986
167	-0.06866		167	-0.10529
167.109	-0.05951		167.125	-0.10681
167.203	-0.05951		167.25	-0.10834
167.312	-0.06561		167.312	-0.10376
167.406	-0.06104		167.438	-0.08545
167.5	-0.04578		167.5	-0.10986
167.609	-0.04272		167.625	-0.11749
167.703	-0.0412		167.75	-0.12054
167.812	-0.04425		167.812	-0.10223
167.906	-0.05188		167.938	-0.11139
168	-0.04883		168	-0.10986
168.109	-0.04425		168.125	-0.11292
168.203	-0.0473		168.25	-0.09613
168.312	-0.04883		168.312	-0.10223
168.406	-0.02899		168.438	-0.10223
168.5	-0.03052		168.5	-0.09918
168.609	-0.02289		168.625	-0.08698
168.703	-0.03357		168.75	-0.07324
168.812	-0.04425		168.812	-0.06104
168.906	-0.0351		168.938	-0.07324
169	-0.04578		169	-0.05035
169.109	-0.03815		169.125	-0.06104
169.203	-0.03357		169.25	-0.05035
169.312	-0.03052		169.312	-0.05646
169.406	-0.03357		169.438	-0.07629
169.5	-0.0412		169.5	-0.07477
169.609	-0.03662		169.625	-0.06866
169.703	-0.03967		169.75	-0.06104
169.812	-0.06104		169.812	-0.03967
169.906	-0.06256		169.938	-0.0412
170	-0.07172		170	-0.02747
170.109	-0.07935		170.125	-0.03204
170.203	-0.07935		170.25	-0.03052
170.312	-0.07629		170.312	-0.03204
170.406	-0.07324		170.438	-0.03815
170.5	-0.07782		170.5	-0.02899
170.609	-0.07477		170.625	-0.02289
170.703	-0.07019		170.75	-0.02136
170.812	-0.07782		170.812	-0.01526
170.906	-0.08087		170.938	-0.02289
171	-0.09003		171	-0.03052
171.109	-0.0885		171.125	-0.0412
171.203	-0.09918		171.25	-0.03662
171.312	-0.10376		171.312	-0.04425
171.406	-0.11597		171.438	-0.0351
171.5	-0.1236		171.5	-0.05341
171.609	-0.12817		171.625	-0.06866
171.703	-0.13123		171.75	-0.0473
171.812	-0.13885		171.812	-0.03052
171.906	-0.14191		171.938	-0.04578
172	-0.14496		172	-0.04425
172.109	-0.13733		172.125	-0.0473
172.203	-0.13885		172.25	-0.04272
172.312	-0.13428		172.312	-0.05798
172.406	-0.13123		172.438	-0.06409
172.5	-0.1358		172.5	-0.06714
172.609	-0.14801		172.625	-0.06714
172.703	-0.14343		172.75	-0.06561
172.812	-0.13275		172.812	-0.05341
172.906	-0.12817		172.938	-0.06256
173	-0.11444		173	-0.05951
173.109	-0.10529		173.125	-0.07477
173.203	-0.10986		173.25	-0.0885
173.312	-0.09766		173.312	-0.10376
173.406	-0.09766		173.438	-0.07782
173.5	-0.09003		173.5	-0.09155
173.609	-0.0824		173.625	-0.10834
173.703	-0.0824		173.75	-0.09766
173.812	-0.07782		173.812	-0.0946
173.906	-0.06561		173.938	-0.07935
174	-0.07324		174	-0.07477
174.109	-0.06866		174.125	-0.09308
174.203	-0.05646		174.25	-0.0824
174.312	-0.05035		174.312	-0.10376
174.406	-0.04425		174.438	-0.11292
174.5	-0.02136		174.5	-0.11292
174.609	-0.02136		174.625	-0.11749
174.703	-0.01526		174.75	-0.11749
174.812	-0.01526		174.812	-0.1236
174.906	-0.01678		174.938	-0.1236
175	-0.01373		175	-0.10834
175.109	-0.02747		175.125	-0.09766
175.203	-0.03662		175.25	-0.09003
175.312	-0.03967		175.312	-0.09613
175.406	-0.03204		175.438	-0.07935
175.5	-0.03052		175.5	-0.09766
175.609	-0.0351		175.625	-0.06561
175.703	-0.03204		175.75	-0.05798
175.812	-0.02136		175.812	-0.06714
175.906	-0.0061		175.938	-0.04883
176	-0.01831		176	-0.06561
176.109	-0.01678		176.125	-0.0473
176.203	-0.00763		176.25	-0.03815
176.312	-0.02594		176.312	-0.03967
176.406	-0.02899		176.438	-0.03204
176.5	-0.03357		176.5	-0.00763
176.609	-0.05341		176.625	-0.00305
176.703	-0.0473		176.75	0.00763
176.812	-0.05188		176.812	0.00763
176.906	-0.05341		176.938	-0.00305
177	-0.04883		177	0.01221
177.109	-0.05798		177.125	-0.01068
177.203	-0.07324		177.25	0.00458
177.312	-0.08087		177.312	0.00916
177.406	-0.07324		177.438	0.00153
177.5	-0.06714		177.5	-0.01221
177.609	-0.06256		177.625	0.00763
177.703	-0.07629		177.75	0.01068
177.812	-0.07782		177.812	0.01526
177.906	-0.0824		177.938	0.01526
178	-0.0885		178	-0.00305
178.109	-0.0946		178.125	-0.00763
178.203	-0.10223		178.25	-0.0061
178.312	-0.09613		178.312	-0.01373
178.406	-0.08392		178.438	-0.00763
178.5	-0.07172		178.5	-0.00763
178.609	-0.07629		178.625	-0.02441
178.703	-0.07782		178.75	-0.02289
178.812	-0.0824		178.812	-0.04425
178.906	-0.07782		178.938	-0.04425
179	-0.08392		179	-0.05646
179.109	-0.08087		179.125	-0.0824
179.203	-0.09003		179.25	-0.07477
179.312	-0.09003		179.312	-0.07477
179.406	-0.08087		179.438	-0.0412
179.5	-0.09918		179.5	-0.04425
179.609	-0.08545		179.625	-0.04272
179.703	-0.09918		179.75	-0.04578
179.812	-0.08545		179.812	-0.05035
179.906	-0.09003		179.938	-0.05341
180	-0.08087		180	-0.05493
180.109	-0.08392		180.125	-0.06104
180.203	-0.07172		180.25	-0.07629
180.312	-0.06104		180.312	-0.06561
180.406	-0.05341		180.438	-0.07324
180.5	-0.05646		180.5	-0.06256
180.609	-0.06256		180.625	-0.0473
180.703	-0.05493		180.75	-0.07477
180.812	-0.0473		180.812	-0.06866
180.906	-0.04578		180.938	-0.07172
181	-0.03815		181	-0.07782
181.109	-0.03662		181.125	-0.07629
181.203	-0.04272		181.25	-0.07477
181.312	-0.04272		181.312	-0.08545
181.406	-0.03815		181.438	-0.08698
181.5	-0.03204		181.5	-0.09766
181.609	-0.01068		181.625	-0.0946
181.703	-0.00916		181.75	-0.07629
181.812	-0.00916		181.812	-0.0885
181.906	-0.0061		181.938	-0.07935
182	0.00153		182	-0.07324
182.109	0.00458		182.125	-0.07324
182.203	0.01373		182.25	-0.06561
182.312	0.00458		182.312	-0.05035
182.406	-0.00153		182.438	-0.07629
182.5	-0.00305		182.5	-0.07629
182.609	-0.00305		182.625	-0.09003
182.703	-0.00916		182.75	-0.10071
182.812	-0.01068		182.812	-0.08698
182.906	-0.00153		182.938	-0.08698
183	0.01068		183	-0.08392
183.109	0.0061		183.125	-0.07935
183.203	-0.00305		183.25	-0.07019
183.312	-0.01221		183.312	-0.06256
183.406	-0.02747		183.438	-0.05035
183.5	-0.03357		183.5	-0.05035
183.609	-0.03357		183.625	-0.05188
183.703	-0.05035		183.75	-0.04883
183.812	-0.06409		183.812	-0.03204
183.906	-0.05341		183.938	-0.02136
184	-0.08087		184	-0.02899
184.109	-0.0946		184.125	-0.02747
184.203	-0.0946		184.25	-0.00916
184.312	-0.10529		184.312	-0.01373
184.406	-0.10986		184.438	0.0061
184.5	-0.10376		184.5	0.00916
184.609	-0.10986		184.625	0.00153
184.703	-0.10834		184.75	0.00763
184.812	-0.11292		184.812	0.00458
184.906	-0.12207		184.938	-0.01526
185	-0.12665		185	0.01678
185.109	-0.13733		185.125	0.01678
185.203	-0.14191		185.25	0.01068
185.312	-0.14191		185.312	0.00763
185.406	-0.13428		185.438	-0.01984
185.5	-0.14038		185.5	-0.03204
185.609	-0.13885		185.625	-0.02441
185.703	-0.13123		185.75	-0.0412
185.812	-0.12817		185.812	-0.0473
185.906	-0.12054		185.938	-0.06409
186	-0.12817		186	-0.04883
186.109	-0.11597		186.125	-0.07477
186.203	-0.11292		186.25	-0.08087
186.312	-0.11139		186.312	-0.10986
186.406	-0.11444		186.438	-0.11139
186.5	-0.10376		186.5	-0.12054
186.609	-0.0885		186.625	-0.1236
186.703	-0.09003		186.75	-0.13123
186.812	-0.07782		186.812	-0.15411
186.906	-0.07324		186.938	-0.16479
187	-0.06104		187	-0.15869
187.109	-0.06714		187.125	-0.16022
187.203	-0.06866		187.25	-0.15411
187.312	-0.06714		187.312	-0.14038
187.406	-0.05798		187.438	-0.14648
187.5	-0.05798		187.5	-0.12665
187.609	-0.06256		187.625	-0.11597
187.703	-0.06104		187.75	-0.11292
187.812	-0.06866		187.812	-0.11597
187.906	-0.06561		187.938	-0.10529
188	-0.07477		188	-0.10681
188.109	-0.07019		188.125	-0.10986
188.203	-0.05798		188.25	-0.11139
188.312	-0.05951		188.312	-0.10986
188.406	-0.05646		188.438	-0.09613
188.5	-0.05188		188.5	-0.09613
188.609	-0.04272		188.625	-0.08698
188.703	-0.05798		188.75	-0.09308
188.812	-0.05035		188.812	-0.08698
188.906	-0.05493		188.938	-0.08087
189	-0.05493		189	-0.09308
189.109	-0.04883		189.125	-0.11444
189.203	-0.05951		189.25	-0.10223
189.312	-0.06409		189.312	-0.10681
189.406	-0.06866		189.438	-0.11597
189.5	-0.07019		189.5	-0.10681
189.609	-0.05951		189.625	-0.11902
189.703	-0.05188		189.75	-0.11444
189.812	-0.05493		189.812	-0.1297
189.906	-0.0473		189.938	-0.12512
190	-0.05341		190	-0.10986
190.109	-0.05493		190.125	-0.09766
190.203	-0.06714		190.25	-0.0824
190.312	-0.07935		190.312	-0.07019
190.406	-0.08087		190.438	-0.07629
190.5	-0.07629		190.5	-0.08545
190.609	-0.08392		190.625	-0.06866
190.703	-0.08392		190.75	-0.06714
190.812	-0.07629		190.812	-0.06866
190.906	-0.09003		190.938	-0.07477
191	-0.11292		191	-0.07477
191.109	-0.10681		191.125	-0.06409
191.203	-0.0946		191.25	-0.08087
191.312	-0.11444		191.312	-0.07172
191.406	-0.11444		191.438	-0.07172
191.5	-0.11292		191.5	-0.06409
191.609	-0.1297		191.625	-0.05798
191.703	-0.12512		191.75	-0.06409
191.812	-0.13733		191.812	-0.06409
191.906	-0.13123		191.938	-0.05188
192	-0.13275		192	-0.03204
192.109	-0.14648		192.125	-0.05341
192.203	-0.14954		192.25	-0.0412
192.312	-0.14801		192.312	-0.04883
192.406	-0.14038		192.438	-0.04425
192.5	-0.14191		192.5	-0.0473
192.609	-0.13733		192.625	-0.04883
192.703	-0.13275		192.75	-0.05951
192.812	-0.13123		192.812	-0.07019
192.906	-0.1297		192.938	-0.07477
193	-0.11902		193	-0.08087
193.109	-0.10834		193.125	-0.09308
193.203	-0.10376		193.25	-0.09155
193.312	-0.11444		193.312	-0.08698
193.406	-0.12054		193.438	-0.09918
193.5	-0.12054		193.5	-0.10223
193.609	-0.11139		193.625	-0.09766
193.703	-0.0946		193.75	-0.11902
193.812	-0.0885		193.812	-0.12665
193.906	-0.06561		193.938	-0.10681
194	-0.06256		194	-0.11902
194.109	-0.05646		194.125	-0.11902
194.203	-0.03204		194.25	-0.11139
194.312	-0.02289		194.312	-0.11749
194.406	-0.01678		194.438	-0.11597
194.5	-0.02136		194.5	-0.11139
194.609	-0.01373		194.625	-0.11597
194.703	-0.01526		194.75	-0.11139
194.812	-0.01068		194.812	-0.10986
194.906	-0.00763		194.938	-0.10681
195	-0.00916		195	-0.09918
195.109	-0.02747		195.125	-0.09918
195.203	-0.03357		195.25	-0.0885
195.312	-0.03204		195.312	-0.07172
195.406	-0.03967		195.438	-0.07629
195.5	-0.04578		195.5	-0.07172
195.609	-0.03662		195.625	-0.06714
195.703	-0.03052		195.75	-0.08392
195.812	-0.03815		195.812	-0.08392
195.906	-0.05035		195.938	-0.09308
196	-0.07019		196	-0.07477
196.109	-0.07324		196.125	-0.05798
196.203	-0.06104		196.25	-0.05341
196.312	-0.0824		196.312	-0.03204
196.406	-0.0885		196.438	-0.02441
196.5	-0.0946		196.5	-0.01984
196.609	-0.08392		196.625	-0.01221
196.703	-0.07019		196.75	-0.02136
196.812	-0.06409		196.812	-0.02747
196.906	-0.06866		196.938	-0.01373
197	-0.05493		197	-0.02136
197.109	-0.06104		197.125	-0.02441
197.203	-0.05188		197.25	-0.01984
197.312	-0.05341		197.312	-0.0351
197.406	-0.0412		197.438	-0.02594
197.5	-0.04272		197.5	-0.03357
197.609	-0.03815		197.625	-0.01831
197.703	-0.03815		197.75	-0.01678
197.812	-0.04578		197.812	-0.02136
197.906	-0.05493		197.938	-0.03357
198	-0.05646		198	-0.01678
198.109	-0.07019		198.125	-0.05035
198.203	-0.06256		198.25	-0.04578
198.312	-0.06256		198.312	-0.02594
198.406	-0.07019		198.438	-0.03967
198.5	-0.07172		198.5	-0.04272
198.609	-0.06256		198.625	-0.03052
198.703	-0.05188		198.75	-0.03967
198.812	-0.05341		198.812	-0.05188
198.906	-0.04578		198.938	-0.04578
199	-0.04425		199	-0.05341
199.109	-0.03662		199.125	-0.05341
199.203	-0.04425		199.25	-0.06256
199.312	-0.04272		199.312	-0.06409
199.406	-0.05341		199.438	-0.07629
199.5	-0.04272		199.5	-0.07629
199.609	-0.04272		199.625	-0.06714
[truncated: 98,004 more rows]

## Sheet: Figure 3 Dii
ACSF	GdCl3	ACSF
1.69	0.86	1.13
1.87	1.42	1.74
2.84	2.53	3
1.96	1.5	2.16
2.91	2.5	3.27
1.05	0	1.45
0.92	0.42	0.52
