# Supplementary material for: The cation channel mechanisms of subthreshold inward depolarizing currents in the mice VTA dopaminergic neurons and their roles in the chronic-stress-induced depression-like behavior
Source: eLife. 2024 Dec 6;12:RP88319. doi: 10.7554/eLife.88319 (PMC11623934; doi:10.7554/eLife.88319)
Supplement: Figure 3—source data 6. [file elife-88319-fig3-data6.xlsx]

## Sheet: Figure 3 Ei
Time(ms)	RMP(mv)
0	-47.3938
0.79688	-47.3938
1.59375	-47.4243
2.39844	-47.4243
3.19531	-47.3938
4	-47.3633
4.79688	-47.3328
5.59375	-47.3328
6.39844	-47.3328
7.19531	-47.2717
8	-47.2412
8.79688	-47.2107
9.59375	-47.2107
10.3984	-47.2412
11.1953	-47.1802
12	-47.1802
12.7969	-47.1497
13.5938	-47.2717
14.3984	-47.2412
15.1953	-47.2412
16	-47.2412
16.7969	-47.1802
17.5938	-47.1802
18.3984	-47.1191
19.1953	-47.1802
20	-47.1802
20.7969	-47.2717
21.5938	-47.2717
22.3984	-47.1497
23.1953	-47.1802
24	-47.1802
24.7969	-47.1802
25.5938	-47.2107
26.3984	-47.2107
27.1953	-47.2412
28	-47.2107
28.7969	-47.1802
29.5938	-47.2717
30.3984	-47.1497
31.1953	-47.0886
32	-47.0886
32.7969	-47.1191
33.5938	-47.1802
34.3984	-47.2107
35.1953	-47.1497
36	-47.0886
36.7969	-47.1802
37.5938	-47.1802
38.3984	-47.1191
39.1953	-47.0886
40	-47.1802
40.7969	-47.2107
41.5938	-47.2107
42.3984	-47.1191
43.1953	-47.0886
44	-47.0886
44.7969	-47.0581
45.5938	-47.0581
46.3984	-47.0276
47.1953	-47.0276
48	-47.0886
48.7969	-47.0886
49.5938	-47.1497
50.3984	-47.0886
51.1953	-47.0276
52	-47.0581
52.7969	-47.0581
53.5938	-47.1497
54.3984	-47.1497
55.1953	-47.1802
56	-47.2107
56.7969	-47.2107
57.5938	-47.2412
58.3984	-47.2412
59.1953	-47.2717
60	-47.2717
60.7969	-47.3328
61.5938	-47.2717
62.3984	-47.2107
63.1953	-47.1802
64	-47.2107
64.7969	-47.2412
65.5938	-47.2412
66.3984	-47.2412
67.1953	-47.2107
68	-47.2412
68.7969	-47.2412
69.5938	-47.2412
70.3984	-47.1802
71.1953	-47.1497
72	-47.2107
72.7969	-47.2412
73.5938	-47.3328
74.3984	-47.3328
75.1953	-47.3328
76	-47.3633
76.7969	-47.3633
77.5938	-47.3938
78.3984	-47.2717
79.1953	-47.3328
80	-47.3938
80.7969	-47.4548
81.5938	-47.4548
82.3984	-47.3633
83.1953	-47.2717
84	-47.2717
84.7969	-47.2717
85.5938	-47.3328
86.3984	-47.3633
87.1953	-47.3938
88	-47.3023
88.7969	-47.2717
89.5938	-47.2717
90.3984	-47.1802
91.1953	-47.0886
92	-47.0276
92.7969	-47.1191
93.5938	-47.1497
94.3984	-47.0581
95.1953	-47.0886
96	-47.0276
96.7969	-47.0581
97.5938	-47.0276
98.3984	-46.9971
99.1953	-46.9971
100	-47.0276
100.797	-47.0581
101.594	-47.0581
102.398	-47.0581
103.195	-46.936
104	-46.9665
104.797	-46.936
105.594	-46.9971
106.398	-46.9665
107.195	-46.9971
108	-46.936
108.797	-46.9055
109.594	-46.936
110.398	-46.814
111.195	-46.7529
112	-46.814
112.797	-46.875
113.594	-46.9665
114.398	-46.936
115.195	-46.9971
116	-46.9971
116.797	-47.0276
117.594	-46.9971
118.398	-47.0276
119.195	-47.0581
120	-47.1497
120.797	-47.2107
121.594	-47.1802
122.398	-47.1497
123.195	-47.0886
124	-47.0276
124.797	-47.0886
125.594	-47.0886
126.398	-47.0886
127.195	-47.0581
128	-47.0276
128.797	-47.0581
129.594	-47.0276
130.398	-46.9665
131.195	-46.9665
132	-47.0276
132.797	-47.0886
133.594	-47.1191
134.398	-47.0886
135.195	-47.1191
136	-47.1497
136.797	-47.1497
137.594	-47.1802
138.398	-47.1802
139.195	-47.1802
140	-47.2717
140.797	-47.2412
141.594	-47.2717
142.398	-47.2412
143.195	-47.1802
144	-47.1497
144.797	-47.1802
145.594	-47.1802
146.398	-47.0886
147.195	-47.0276
148	-47.0581
148.797	-47.0581
149.594	-47.0581
150.398	-47.0581
151.195	-47.1191
152	-47.1191
152.797	-47.1497
153.594	-47.1497
154.398	-47.1191
155.195	-47.1191
156	-47.1497
156.797	-47.1802
157.594	-47.1497
158.398	-47.1802
159.195	-47.1802
160	-47.1497
160.797	-47.2107
161.594	-47.1191
162.398	-47.0581
163.195	-46.9971
164	-46.9971
164.797	-47.0276
165.594	-46.9971
166.398	-47.0886
167.195	-47.0886
168	-47.1191
168.797	-47.1191
169.594	-47.2107
170.398	-47.0886
171.195	-47.0886
172	-47.1802
172.797	-47.2412
173.594	-47.3633
174.398	-47.2717
175.195	-47.3633
176	-47.3633
176.797	-47.3633
177.594	-47.3938
178.398	-47.4243
179.195	-47.5159
180	-47.5159
180.797	-47.6379
181.594	-47.6685
182.398	-47.6074
183.195	-47.6074
184	-47.6074
184.797	-47.6685
185.594	-47.6379
186.398	-47.76
187.195	-47.76
188	-47.7295
188.797	-47.7905
189.594	-47.7295
190.398	-47.76
191.195	-47.699
192	-47.699
192.797	-47.7905
193.594	-47.821
194.398	-47.821
195.195	-47.8516
196	-47.8516
196.797	-47.7905
197.594	-47.8516
198.398	-47.8821
199.195	-47.8516
200	-47.9431
200.797	-47.9126
201.594	-47.9736
202.398	-47.9126
203.195	-47.8821
204	-47.8516
204.797	-47.9431
205.594	-47.9126
206.398	-47.821
207.195	-47.8516
208	-47.7905
208.797	-47.7905
209.594	-47.7905
210.398	-47.699
211.195	-47.7295
212	-47.7295
212.797	-47.7295
213.594	-47.7905
214.398	-47.76
215.195	-47.76
216	-47.7295
216.797	-47.76
217.594	-47.7295
218.398	-47.7295
219.195	-47.7295
220	-47.76
220.797	-47.7905
221.594	-47.7905
222.398	-47.7905
223.195	-47.7295
224	-47.76
224.797	-47.6685
225.594	-47.6685
226.398	-47.7295
227.195	-47.7295
228	-47.821
228.797	-47.699
229.594	-47.7905
230.398	-47.7295
231.195	-47.6685
232	-47.6685
232.797	-47.699
233.594	-47.8821
234.398	-47.8516
235.195	-47.8516
236	-47.8821
236.797	-47.821
237.594	-47.8516
238.398	-47.821
239.195	-47.821
240	-47.821
240.797	-47.7905
241.594	-47.821
242.398	-47.8516
243.195	-47.7905
244	-47.699
244.797	-47.7905
245.594	-47.76
246.398	-47.7905
247.195	-47.7905
248	-47.76
248.797	-47.76
249.594	-47.76
250.398	-47.699
251.195	-47.5769
252	-47.6074
252.797	-47.6685
253.594	-47.6685
254.398	-47.699
255.195	-47.6074
256	-47.7295
256.797	-47.699
257.594	-47.6379
258.398	-47.6379
259.195	-47.6074
260	-47.6379
260.797	-47.6379
261.594	-47.76
262.398	-47.6074
263.195	-47.5769
264	-47.5159
264.797	-47.4853
265.594	-47.5464
266.398	-47.5464
267.195	-47.5769
268	-47.5769
268.797	-47.5464
269.594	-47.6074
270.398	-47.4853
271.195	-47.4548
272	-47.4853
272.797	-47.5464
273.594	-47.6074
274.398	-47.5159
275.195	-47.6074
276	-47.5464
276.797	-47.5159
277.594	-47.4853
278.398	-47.4853
279.195	-47.4853
280	-47.5464
280.797	-47.5159
281.594	-47.5769
282.398	-47.5769
283.195	-47.4853
284	-47.4243
284.797	-47.3633
285.594	-47.4243
286.398	-47.4243
287.195	-47.3023
288	-47.3328
288.797	-47.2717
289.594	-47.0886
290.398	-46.936
291.195	-46.7835
292	-46.7529
292.797	-46.6919
293.594	-46.7529
294.398	-46.6919
295.195	-46.6309
296	-46.6919
296.797	-46.6614
297.594	-46.6003
298.398	-46.5393
299.195	-46.6309
300	-46.6309
300.797	-46.6309
301.594	-46.6309
302.398	-46.6003
303.195	-46.6003
304	-46.6003
304.797	-46.5698
305.594	-46.5698
306.398	-46.6003
307.195	-46.6003
308	-46.6309
308.797	-46.6614
309.594	-46.6003
310.398	-46.5698
311.195	-46.6003
312	-46.6003
312.797	-46.6614
313.594	-46.7224
314.398	-46.6919
315.195	-46.7835
316	-46.7529
316.797	-46.814
317.594	-46.875
318.398	-46.9055
319.195	-46.9055
320	-46.9971
320.797	-47.0276
321.594	-46.9971
322.398	-46.9665
323.195	-46.9665
324	-46.9971
324.797	-46.9971
325.594	-47.0581
326.398	-47.0276
327.195	-47.0886
328	-47.0886
328.797	-47.0581
329.594	-47.0886
330.398	-47.1802
331.195	-47.0581
332	-47.1802
332.797	-47.2412
333.594	-47.3023
334.398	-47.2412
335.195	-47.2107
336	-47.1802
336.797	-47.1802
337.594	-47.1802
338.398	-47.1497
339.195	-47.2717
340	-47.2412
340.797	-47.3938
341.594	-47.3633
342.398	-47.3633
343.195	-47.2412
344	-47.3023
344.797	-47.3023
345.594	-47.3328
346.398	-47.4243
347.195	-47.3938
348	-47.4243
348.797	-47.3938
349.594	-47.3633
350.398	-47.3633
351.195	-47.2717
352	-47.3328
352.797	-47.3938
353.594	-47.5159
354.398	-47.4548
355.195	-47.3938
356	-47.4243
356.797	-47.3938
357.594	-47.3938
358.398	-47.3633
359.195	-47.3938
360	-47.3938
360.797	-47.3633
361.594	-47.3633
362.398	-47.3023
363.195	-47.3023
364	-47.3023
364.797	-47.2717
365.594	-47.3328
366.398	-47.3328
367.195	-47.3328
368	-47.3938
368.797	-47.4853
369.594	-47.4243
370.398	-47.4548
371.195	-47.4548
372	-47.4853
372.797	-47.5464
373.594	-47.5769
374.398	-47.5464
375.195	-47.5769
376	-47.5464
376.797	-47.5464
377.594	-47.6074
378.398	-47.6685
379.195	-47.6685
380	-47.699
380.797	-47.7295
381.594	-47.7905
382.398	-47.7905
383.195	-47.7905
384	-47.7905
384.797	-47.7905
385.594	-47.8516
386.398	-47.7905
387.195	-47.821
388	-47.8821
388.797	-47.8516
389.594	-47.8516
390.398	-47.8516
391.195	-47.7905
392	-47.7905
392.797	-47.8516
393.594	-47.9431
394.398	-47.8516
395.195	-48.0042
396	-47.9126
396.797	-47.8821
397.594	-47.9126
398.398	-47.9431
399.195	-48.0042
400	-47.9431
400.797	-48.0347
401.594	-48.0652
402.398	-48.0652
403.195	-48.0347
404	-48.0347
404.797	-48.0957
405.594	-48.0957
406.398	-48.0957
407.195	-48.0347
408	-48.1262
408.797	-48.1262
409.594	-48.0957
410.398	-48.0652
411.195	-48.0042
412	-47.9736
412.797	-47.9126
413.594	-47.9736
414.398	-48.0347
415.195	-48.0042
416	-48.0042
416.797	-48.0652
417.594	-48.0652
418.398	-48.0042
419.195	-48.0042
420	-48.0347
420.797	-47.9736
421.594	-48.0652
422.398	-48.0042
423.195	-48.0042
424	-47.9126
424.797	-47.9126
425.594	-47.8821
426.398	-47.821
427.195	-47.821
428	-47.76
428.797	-47.821
429.594	-47.8821
430.398	-47.8516
431.195	-47.76
432	-47.7295
432.797	-47.76
433.594	-47.821
434.398	-47.7905
435.195	-47.76
436	-47.76
436.797	-47.76
437.594	-47.699
438.398	-47.7295
439.195	-47.6685
440	-47.699
440.797	-47.821
441.594	-47.7905
442.398	-47.76
443.195	-47.76
444	-47.7905
444.797	-47.76
445.594	-47.7905
446.398	-47.699
447.195	-47.6685
448	-47.7295
448.797	-47.6379
449.594	-47.6685
450.398	-47.6074
451.195	-47.5159
452	-47.5464
452.797	-47.5769
453.594	-47.6685
454.398	-47.6074
455.195	-47.6685
456	-47.6379
456.797	-47.5769
457.594	-47.6074
458.398	-47.6074
459.195	-47.6685
460	-47.6074
460.797	-47.76
461.594	-47.821
462.398	-47.76
463.195	-47.6685
464	-47.7295
464.797	-47.699
465.594	-47.699
466.398	-47.76
467.195	-47.6685
468	-47.6685
468.797	-47.699
469.594	-47.6379
470.398	-47.6379
471.195	-47.5159
472	-47.5159
472.797	-47.5769
473.594	-47.6685
474.398	-47.699
475.195	-47.6074
476	-47.6074
476.797	-47.6074
477.594	-47.6379
478.398	-47.5769
479.195	-47.6379
480	-47.6685
480.797	-47.699
481.594	-47.76
482.398	-47.7295
483.195	-47.699
484	-47.6685
484.797	-47.6685
485.594	-47.7295
486.398	-47.699
487.195	-47.6685
488	-47.699
488.797	-47.76
489.594	-47.6685
490.398	-47.6074
491.195	-47.4853
492	-47.4243
492.797	-47.4548
493.594	-47.4243
494.398	-47.4548
495.195	-47.3938
496	-47.3633
496.797	-47.3328
497.594	-47.3023
498.398	-47.1497
499.195	-47.1497
500	-47.1497
500.797	-47.1497
501.594	-47.1802
502.398	-47.2107
503.195	-46.9971
504	-47.0886
504.797	-47.0581
505.594	-47.0581
506.398	-47.0276
507.195	-46.9665
508	-47.0581
508.797	-46.9971
509.594	-46.9971
510.398	-46.9971
511.195	-46.936
512	-46.9665
512.797	-47.0581
513.594	-47.1497
514.398	-47.1497
515.195	-47.1497
516	-47.1497
516.797	-47.1191
517.594	-47.2107
518.398	-47.2107
519.195	-47.2412
520	-47.2412
520.797	-47.2717
521.594	-47.2717
522.398	-47.2717
523.195	-47.2107
524	-47.2412
524.797	-47.2107
525.594	-47.2412
526.398	-47.3023
527.195	-47.2717
528	-47.2717
528.797	-47.3023
529.594	-47.1802
530.398	-47.2107
531.195	-47.1497
532	-47.1497
532.797	-47.2412
533.594	-47.2717
534.398	-47.3328
535.195	-47.3023
536	-47.3938
536.797	-47.3023
537.594	-47.3938
538.398	-47.3633
539.195	-47.3328
540	-47.4243
540.797	-47.4548
541.594	-47.5159
542.398	-47.4243
543.195	-47.4853
544	-47.4548
544.797	-47.4853
545.594	-47.4853
546.398	-47.5464
547.195	-47.5464
548	-47.5769
548.797	-47.5769
549.594	-47.5769
550.398	-47.6074
551.195	-47.5769
552	-47.5159
552.797	-47.6074
553.594	-47.6379
554.398	-47.699
555.195	-47.6685
556	-47.6685
556.797	-47.6685
557.594	-47.699
558.398	-47.6685
559.195	-47.6685
560	-47.76
560.797	-47.699
561.594	-47.7295
562.398	-47.7295
563.195	-47.6685
564	-47.6685
564.797	-47.7295
565.594	-47.6685
566.398	-47.699
567.195	-47.699
568	-47.7295
568.797	-47.7295
569.594	-47.6074
570.398	-47.6379
571.195	-47.5159
572	-47.6379
572.797	-47.6074
573.594	-47.7295
574.398	-47.6685
575.195	-47.6379
576	-47.699
576.797	-47.699
577.594	-47.699
578.398	-47.6379
579.195	-47.6685
580	-47.6379
580.797	-47.699
581.594	-47.7295
582.398	-47.6685
583.195	-47.6379
584	-47.6074
584.797	-47.6074
585.594	-47.6379
586.398	-47.6379
587.195	-47.6379
588	-47.6379
588.797	-47.6074
589.594	-47.5464
590.398	-47.5159
591.195	-47.4243
592	-47.4548
592.797	-47.4548
593.594	-47.4853
594.398	-47.5159
595.195	-47.4243
596	-47.3938
596.797	-47.3633
597.594	-47.3328
598.398	-47.3328
599.195	-47.3328
600	-47.4243
600.797	-47.3328
601.594	-47.4548
602.398	-47.3328
603.195	-47.2717
604	-47.2717
604.797	-47.2107
605.594	-47.2717
606.398	-47.2412
607.195	-47.2412
608	-47.2107
608.797	-47.2412
609.594	-47.3023
610.398	-47.2717
611.195	-47.2717
612	-47.2412
612.797	-47.3633
613.594	-47.3328
614.398	-47.3328
615.195	-47.3633
616	-47.3328
616.797	-47.3938
617.594	-47.3938
618.398	-47.4853
619.195	-47.4548
620	-47.5159
620.797	-47.4853
621.594	-47.5159
622.398	-47.5769
623.195	-47.4853
624	-47.4548
624.797	-47.4853
625.594	-47.5159
626.398	-47.6074
627.195	-47.5159
628	-47.6379
628.797	-47.5769
629.594	-47.5159
630.398	-47.5464
631.195	-47.5464
632	-47.5769
632.797	-47.5464
633.594	-47.6379
634.398	-47.6379
635.195	-47.5769
636	-47.6685
636.797	-47.6074
637.594	-47.6074
638.398	-47.5769
639.195	-47.6379
640	-47.5159
640.797	-47.5769
641.594	-47.5769
642.398	-47.6379
643.195	-47.6379
644	-47.5769
644.797	-47.6379
645.594	-47.6379
646.398	-47.6074
647.195	-47.6074
648	-47.6379
648.797	-47.6685
649.594	-47.6074
650.398	-47.6379
651.195	-47.4548
652	-47.5159
652.797	-47.5159
653.594	-47.5159
654.398	-47.6379
655.195	-47.5769
656	-47.6074
656.797	-47.5159
657.594	-47.5159
658.398	-47.5769
659.195	-47.5159
660	-47.6074
660.797	-47.6379
661.594	-47.76
662.398	-47.699
663.195	-47.6379
664	-47.699
664.797	-47.6379
665.594	-47.6685
666.398	-47.6379
667.195	-47.699
668	-47.7295
668.797	-47.699
669.594	-47.7295
670.398	-47.7295
671.195	-47.6685
672	-47.6685
672.797	-47.699
673.594	-47.7905
674.398	-47.821
675.195	-47.76
676	-47.7905
676.797	-47.7905
677.594	-47.699
678.398	-47.699
679.195	-47.6685
680	-47.6685
680.797	-47.699
681.594	-47.76
682.398	-47.76
683.195	-47.7295
684	-47.699
684.797	-47.7295
685.594	-47.699
686.398	-47.6379
687.195	-47.6074
688	-47.6685
688.797	-47.6074
689.594	-47.6379
690.398	-47.6074
691.195	-47.5159
692	-47.6379
692.797	-47.5769
693.594	-47.6685
694.398	-47.6685
695.195	-47.6685
696	-47.699
696.797	-47.6685
697.594	-47.699
698.398	-47.7295
699.195	-47.699
700	-47.76
700.797	-47.699
701.594	-47.7905
702.398	-47.8821
703.195	-47.821
704	-47.821
704.797	-47.821
705.594	-47.821
706.398	-47.9126
707.195	-47.9126
708	-47.9126
708.797	-47.9431
709.594	-47.9431
710.398	-47.9736
711.195	-47.8821
712	-47.8821
712.797	-47.8821
713.594	-47.9736
714.398	-47.9736
715.195	-48.0042
716	-47.9736
716.797	-47.9736
717.594	-48.0347
718.398	-48.0042
719.195	-48.0347
720	-48.1262
720.797	-48.1262
721.594	-48.2178
722.398	-48.1567
723.195	-48.0347
724	-48.0347
724.797	-48.0042
725.594	-48.0042
726.398	-48.0347
727.195	-48.1262
728	-48.0652
728.797	-48.1262
729.594	-48.0957
730.398	-48.0957
731.195	-48.0347
732	-48.0652
732.797	-48.0957
733.594	-48.2178
734.398	-48.2483
735.195	-48.1873
736	-48.2178
736.797	-48.1567
737.594	-48.1567
738.398	-48.2178
739.195	-48.2788
740	-48.2788
740.797	-48.3398
741.594	-48.4009
742.398	-48.3704
743.195	-48.3093
744	-48.3398
744.797	-48.3704
745.594	-48.4314
746.398	-48.4314
747.195	-48.4009
748	-48.4619
748.797	-48.4314
749.594	-48.4314
750.398	-48.4009
751.195	-48.3398
752	-48.4009
752.797	-48.3704
753.594	-48.4924
754.398	-48.4924
755.195	-48.4619
756	-48.4314
756.797	-48.4009
757.594	-48.4619
758.398	-48.4314
759.195	-48.4924
760	-48.523
760.797	-48.4924
761.594	-48.584
762.398	-48.4924
763.195	-48.4619
764	-48.3704
764.797	-48.4009
765.594	-48.4314
766.398	-48.3398
767.195	-48.3093
768	-48.3093
768.797	-48.3398
769.594	-48.3093
770.398	-48.2178
771.195	-48.1873
772	-48.2178
772.797	-48.3093
773.594	-48.2788
774.398	-48.3093
775.195	-48.2483
776	-48.1873
776.797	-48.2178
777.594	-48.1567
778.398	-48.1567
779.195	-48.1873
780	-48.2178
780.797	-48.2483
781.594	-48.2483
782.398	-48.2178
783.195	-48.1262
784	-48.1262
784.797	-48.1262
785.594	-48.1873
786.398	-48.1873
787.195	-48.2178
788	-48.1873
788.797	-48.2178
789.594	-48.1873
790.398	-48.2788
791.195	-48.2178
792	-48.2178
792.797	-48.1567
793.594	-48.3398
794.398	-48.2788
795.195	-48.2788
796	-48.2178
796.797	-48.1873
797.594	-48.2178
798.398	-48.2483
799.195	-48.2483
800	-48.2788
800.797	-48.3704
801.594	-48.3093
802.398	-48.3398
803.195	-48.3398
804	-48.3093
804.797	-48.3093
805.594	-48.3093
806.398	-48.3398
807.195	-48.2178
808	-48.2483
808.797	-48.2788
809.594	-48.2788
810.398	-48.2788
811.195	-48.1567
812	-48.2483
812.797	-48.1873
813.594	-48.2788
814.398	-48.2788
815.195	-48.1873
816	-48.2178
816.797	-48.1873
817.594	-48.1873
818.398	-48.1567
819.195	-48.1567
820	-48.1567
820.797	-48.1873
821.594	-48.2788
822.398	-48.1262
823.195	-48.0957
824	-48.0347
824.797	-48.0042
825.594	-47.9736
826.398	-48.0042
827.195	-47.9736
828	-47.9431
828.797	-47.9736
829.594	-47.9431
830.398	-47.8516
831.195	-47.9126
832	-47.8516
832.797	-47.8516
833.594	-47.8821
834.398	-47.9126
835.195	-47.8516
836	-47.8516
836.797	-47.821
837.594	-47.7905
838.398	-47.7905
839.195	-47.699
840	-47.76
840.797	-47.7295
841.594	-47.76
842.398	-47.76
843.195	-47.699
844	-47.7295
844.797	-47.6379
845.594	-47.6685
846.398	-47.6379
847.195	-47.6685
848	-47.7295
848.797	-47.699
849.594	-47.699
850.398	-47.6685
851.195	-47.6379
852	-47.6379
852.797	-47.6685
853.594	-47.7295
854.398	-47.76
855.195	-47.76
856	-47.6685
856.797	-47.6685
857.594	-47.699
858.398	-47.6379
859.195	-47.6074
860	-47.6379
860.797	-47.6379
861.594	-47.6074
862.398	-47.6379
863.195	-47.5769
864	-47.4853
864.797	-47.5159
865.594	-47.4548
866.398	-47.4243
867.195	-47.3938
868	-47.3633
868.797	-47.4243
869.594	-47.4243
870.398	-47.3633
871.195	-47.2412
872	-47.3023
872.797	-47.3328
873.594	-47.3633
874.398	-47.3633
875.195	-47.3328
876	-47.3633
876.797	-47.3023
877.594	-47.3328
878.398	-47.3328
879.195	-47.3633
880	-47.3938
880.797	-47.3328
881.594	-47.4548
882.398	-47.4548
883.195	-47.4243
884	-47.3938
884.797	-47.3633
885.594	-47.3633
886.398	-47.3938
887.195	-47.4243
888	-47.4243
888.797	-47.4853
889.594	-47.4853
890.398	-47.3938
891.195	-47.4853
892	-47.4243
892.797	-47.4243
893.594	-47.5159
894.398	-47.5464
895.195	-47.4853
896	-47.4548
896.797	-47.5159
897.594	-47.5464
898.398	-47.5769
899.195	-47.5464
900	-47.6074
900.797	-47.6379
901.594	-47.6379
902.398	-47.6685
903.195	-47.6074
904	-47.699
904.797	-47.6074
905.594	-47.6074
906.398	-47.6379
907.195	-47.6379
908	-47.699
908.797	-47.6074
909.594	-47.76
910.398	-47.6685
911.195	-47.6685
912	-47.699
912.797	-47.6379
913.594	-47.7295
914.398	-47.7295
915.195	-47.76
916	-47.76
916.797	-47.7295
917.594	-47.699
918.398	-47.6379
919.195	-47.7295
920	-47.699
920.797	-47.76
921.594	-47.76
922.398	-47.7295
923.195	-47.6074
924	-47.5769
924.797	-47.5769
925.594	-47.5159
926.398	-47.6685
927.195	-47.6074
928	-47.6074
928.797	-47.6074
929.594	-47.5464
930.398	-47.5769
931.195	-47.5464
932	-47.4548
932.797	-47.5159
933.594	-47.5464
934.398	-47.699
935.195	-47.6685
936	-47.76
936.797	-47.7295
937.594	-47.76
938.398	-47.76
939.195	-47.7905
940	-47.9126
940.797	-47.9126
941.594	-48.0042
942.398	-47.9431
943.195	-47.9736
944	-47.9431
944.797	-47.9431
945.594	-48.0652
946.398	-48.0347
947.195	-48.0652
948	-48.1262
948.797	-48.1873
949.594	-48.1567
950.398	-48.1567
951.195	-48.1567
952	-48.1873
952.797	-48.2483
953.594	-48.2788
954.398	-48.3704
955.195	-48.3704
956	-48.4009
956.797	-48.3704
957.594	-48.4009
958.398	-48.3704
959.195	-48.3704
960	-48.4009
960.797	-48.4009
961.594	-48.4924
962.398	-48.4009
963.195	-48.3704
964	-48.3398
964.797	-48.3704
965.594	-48.4009
966.398	-48.4009
967.195	-48.3704
968	-48.4924
968.797	-48.4619
969.594	-48.4924
970.398	-48.4314
971.195	-48.4619
972	-48.5535
972.797	-48.4924
973.594	-48.6145
974.398	-48.645
975.195	-48.645
976	-48.6145
976.797	-48.645
977.594	-48.6145
978.398	-48.6145
979.195	-48.6145
980	-48.584
980.797	-48.6145
981.594	-48.6755
982.398	-48.645
983.195	-48.5535
984	-48.5535
984.797	-48.6145
985.594	-48.6145
986.398	-48.6145
987.195	-48.584
988	-48.645
988.797	-48.706
989.594	-48.6145
990.398	-48.6755
991.195	-48.6145
992	-48.706
992.797	-48.706
993.594	-48.7366
994.398	-48.7976
995.195	-48.7366
996	-48.8281
996.797	-48.8586
997.594	-48.9197
998.398	-48.8892
999.195	-48.8892
1000	-48.9502
1000.8	-48.9502
1001.59	-49.0112
1002.4	-48.9197
1003.2	-48.8586
1004	-48.8281
1004.8	-48.8586
1005.59	-48.8281
1006.4	-48.7976
1007.2	-48.7976
1008	-48.7671
1008.8	-48.7671
1009.59	-48.706
1010.4	-48.706
1011.2	-48.7366
1012	-48.706
1012.8	-48.7366
1013.59	-48.7671
1014.4	-48.7976
1015.2	-48.7366
1016	-48.645
1016.8	-48.7366
1017.59	-48.6755
1018.4	-48.6755
1019.2	-48.6755
1020	-48.6755
1020.8	-48.6755
1021.59	-48.7366
1022.4	-48.706
1023.2	-48.584
1024	-48.523
1024.8	-48.4924
1025.59	-48.523
1026.4	-48.523
1027.2	-48.523
1028	-48.584
1028.8	-48.4924
1029.59	-48.4009
1030.4	-48.4009
1031.2	-48.3093
1032	-48.3704
1032.8	-48.3093
1033.59	-48.4009
1034.4	-48.3093
1035.2	-48.3093
1036	-48.1567
1036.8	-48.0652
1037.59	-48.0652
1038.4	-48.0042
1039.2	-47.9736
1040	-48.0042
1040.8	-47.9126
1041.59	-48.0042
1042.4	-47.9736
1043.2	-47.9431
1044	-47.8516
1044.8	-47.8821
1045.59	-47.8821
1046.4	-47.8821
1047.2	-47.8516
1048	-47.9126
1048.8	-47.8516
1049.59	-47.8516
1050.4	-47.8821
1051.2	-47.9126
1052	-47.821
1052.8	-47.8516
1053.59	-47.8821
1054.4	-47.9431
1055.2	-47.9126
1056	-48.0042
1056.8	-47.9431
1057.59	-48.0042
1058.4	-48.0957
1059.2	-48.0652
1060	-48.0957
1060.8	-48.0347
1061.59	-48.1262
1062.4	-48.0957
1063.2	-48.0652
1064	-48.0042
1064.8	-47.9736
1065.59	-48.0347
1066.4	-47.9736
1067.2	-48.0347
1068	-47.8821
1068.8	-47.8821
1069.59	-47.9736
1070.4	-47.8516
1071.2	-47.9126
1072	-47.9126
1072.8	-47.821
1073.59	-47.8821
1074.4	-47.8821
1075.2	-47.8516
1076	-47.8821
1076.8	-47.821
1077.59	-47.7905
1078.4	-47.76
1079.2	-47.821
1080	-47.7295
1080.8	-47.76
1081.59	-47.7295
1082.4	-47.76
1083.2	-47.6685
1084	-47.6379
1084.8	-47.699
1085.59	-47.6074
1086.4	-47.6685
1087.2	-47.6379
1088	-47.7295
1088.8	-47.6379
1089.59	-47.5769
1090.4	-47.5464
1091.2	-47.4548
1092	-47.4548
1092.8	-47.4548
1093.59	-47.5464
1094.4	-47.5159
1095.2	-47.5769
1096	-47.5769
1096.8	-47.5464
1097.59	-47.5464
1098.4	-47.5159
1099.2	-47.5464
1100	-47.6074
1100.8	-47.5769
1101.59	-47.699
1102.4	-47.6379
1103.2	-47.6074
1104	-47.5464
1104.8	-47.5769
1105.59	-47.5159
1106.4	-47.5464
1107.2	-47.6379
1108	-47.6074
1108.8	-47.6074
1109.59	-47.5159
1110.4	-47.6074
1111.2	-47.4853
1112	-47.4548
1112.8	-47.5159
1113.59	-47.6379
1114.4	-47.6685
1115.2	-47.6379
1116	-47.6685
1116.8	-47.6379
1117.59	-47.6685
1118.4	-47.6685
1119.2	-47.6379
1120	-47.699
1120.8	-47.6685
1121.59	-47.7905
1122.4	-47.7905
1123.2	-47.76
1124	-47.699
1124.8	-47.6379
1125.59	-47.6379
1126.4	-47.699
1127.2	-47.7295
1128	-47.7295
1128.8	-47.7905
1129.59	-47.7905
1130.4	-47.7905
1131.2	-47.7905
1132	-47.699
1132.8	-47.76
1133.59	-47.821
1134.4	-47.8516
1135.2	-47.8821
1136	-47.8516
1136.8	-47.821
1137.59	-47.76
1138.4	-47.821
1139.2	-47.7295
1140	-47.821
1140.8	-47.8516
1141.59	-47.8821
1142.4	-47.9126
1143.2	-47.8516
1144	-47.7905
1144.8	-47.7295
1145.59	-47.7295
1146.4	-47.821
1147.2	-47.76
1148	-47.76
1148.8	-47.7295
1149.59	-47.6685
1150.4	-47.6074
1151.2	-47.6379
1152	-47.6074
1152.8	-47.6074
1153.59	-47.7295
1154.4	-47.76
1155.2	-47.7295
1156	-47.7905
1156.8	-47.76
1157.59	-47.7905
1158.4	-47.7295
1159.2	-47.76
1160	-47.7905
1160.8	-47.7295
1161.59	-47.8516
1162.4	-47.7905
1163.2	-47.7905
1164	-47.699
1164.8	-47.699
1165.59	-47.6685
1166.4	-47.7295
1167.2	-47.7905
1168	-47.6685
1168.8	-47.6685
1169.59	-47.6685
1170.4	-47.6379
1171.2	-47.5769
1172	-47.5464
1172.8	-47.6074
1173.59	-47.6074
1174.4	-47.6685
1175.2	-47.6379
1176	-47.6685
1176.8	-47.6379
1177.59	-47.6074
1178.4	-47.699
1179.2	-47.7295
1180	-47.8821
1180.8	-47.821
1181.59	-47.9736
1182.4	-47.9736
1183.2	-47.9736
1184	-47.9736
1184.8	-47.9431
1185.59	-48.0042
1186.4	-48.0042
1187.2	-48.0652
1188	-48.1262
1188.8	-48.1262
1189.59	-48.0652
1190.4	-48.0957
1191.2	-48.0652
1192	-48.0652
1192.8	-48.1262
1193.59	-48.2178
1194.4	-48.2178
1195.2	-48.2483
1196	-48.1873
1196.8	-48.1567
1197.59	-48.1262
1198.4	-48.1567
1199.2	-48.1873
1200	-48.2178
1200.8	-48.2483
1201.59	-48.3093
1202.4	-48.2788
1203.2	-48.2178
1204	-48.1567
1204.8	-48.1567
1205.59	-48.1262
1206.4	-48.1873
1207.2	-48.2178
1208	-48.2178
1208.8	-48.2788
1209.59	-48.1873
1210.4	-48.2788
1211.2	-48.1567
1212	-48.1873
1212.8	-48.1873
1213.59	-48.2483
1214.4	-48.3398
1215.2	-48.3398
1216	-48.3398
1216.8	-48.2788
1217.59	-48.2788
1218.4	-48.2178
1219.2	-48.2483
1220	-48.1567
1220.8	-48.1567
1221.59	-48.2178
1222.4	-48.0652
1223.2	-47.9736
1224	-48.0042
1224.8	-47.9431
1225.59	-47.9736
1226.4	-48.0042
1227.2	-48.0652
1228	-48.0652
1228.8	-48.1567
1229.59	-48.0652
1230.4	-48.0957
1231.2	-48.0347
1232	-48.0347
1232.8	-48.0347
1233.59	-48.0347
1234.4	-48.1262
1235.2	-48.0652
1236	-47.9736
1236.8	-48.0042
1237.59	-47.9736
1238.4	-48.0347
1239.2	-47.9736
1240	-48.0347
1240.8	-47.9736
1241.59	-47.9736
1242.4	-47.9736
1243.2	-47.8516
1244	-47.8516
1244.8	-47.7295
1245.59	-47.7905
1246.4	-47.76
1247.2	-47.7905
1248	-47.7905
1248.8	-47.76
1249.59	-47.8516
1250.4	-47.76
1251.2	-47.7905
1252	-47.7295
1252.8	-47.821
1253.59	-47.9126
1254.4	-47.9126
1255.2	-47.9736
1256	-47.9126
1256.8	-47.9126
1257.59	-47.9126
1258.4	-47.9126
1259.2	-47.9736
1260	-47.9126
1260.8	-47.9736
1261.59	-47.9736
1262.4	-47.9431
1263.2	-47.8821
1264	-47.8821
1264.8	-47.8516
1265.59	-47.8516
1266.4	-47.9126
1267.2	-47.8821
1268	-47.821
1268.8	-47.7905
1269.59	-47.76
1270.4	-47.7905
1271.2	-47.7295
1272	-47.76
1272.8	-47.699
1273.59	-47.7905
1274.4	-47.8516
1275.2	-47.8516
1276	-47.8516
1276.8	-47.76
1277.59	-47.8516
1278.4	-47.9126
1279.2	-47.8516
1280	-47.8821
1280.8	-47.8821
1281.59	-47.9126
1282.4	-47.821
1283.2	-47.7295
1284	-47.699
1284.8	-47.6379
1285.59	-47.699
1286.4	-47.7295
1287.2	-47.76
1288	-47.76
1288.8	-47.76
1289.59	-47.6379
1290.4	-47.699
1291.2	-47.5769
1292	-47.5159
1292.8	-47.5159
1293.59	-47.4853
1294.4	-47.5159
1295.2	-47.5159
1296	-47.5159
1296.8	-47.4853
1297.59	-47.5159
1298.4	-47.4548
1299.2	-47.4853
1300	-47.4243
1300.8	-47.4548
1301.59	-47.3938
1302.4	-47.4243
1303.2	-47.3633
1304	-47.3633
1304.8	-47.2412
1305.59	-47.2717
1306.4	-47.3328
1307.2	-47.2412
1308	-47.2107
1308.8	-47.0886
1309.59	-47.1802
1310.4	-47.0886
1311.2	-47.1191
1312	-47.0886
1312.8	-47.0886
1313.59	-47.1191
1314.4	-47.2412
1315.2	-47.2412
1316	-47.2412
1316.8	-47.2107
1317.59	-47.2717
1318.4	-47.2717
1319.2	-47.2717
1320	-47.3023
1320.8	-47.3328
1321.59	-47.3938
1322.4	-47.3023
1323.2	-47.3633
1324	-47.3328
1324.8	-47.3023
1325.59	-47.2412
1326.4	-47.3023
1327.2	-47.3023
1328	-47.3328
1328.8	-47.3023
1329.59	-47.3023
1330.4	-47.2717
1331.2	-47.2412
1332	-47.1802
1332.8	-47.2412
1333.59	-47.2717
1334.4	-47.3633
1335.2	-47.3023
1336	-47.3633
1336.8	-47.3328
1337.59	-47.3328
1338.4	-47.3633
1339.2	-47.3328
1340	-47.3633
1340.8	-47.3938
1341.59	-47.3938
1342.4	-47.3938
1343.2	-47.3633
1344	-47.3633
1344.8	-47.3023
1345.59	-47.3023
1346.4	-47.2717
1347.2	-47.3023
1348	-47.2717
1348.8	-47.2717
1349.59	-47.2717
1350.4	-47.2412
1351.2	-47.2412
1352	-47.1802
1352.8	-47.1802
1353.59	-47.2107
1354.4	-47.2717
1355.2	-47.3328
1356	-47.3633
1356.8	-47.3633
1357.59	-47.3023
1358.4	-47.3328
1359.2	-47.3023
1360	-47.3328
1360.8	-47.3938
1361.59	-47.3938
1362.4	-47.4243
1363.2	-47.3633
1364	-47.3023
1364.8	-47.2717
1365.59	-47.3023
1366.4	-47.3633
1367.2	-47.3328
1368	-47.4243
1368.8	-47.3938
1369.59	-47.4243
1370.4	-47.3633
1371.2	-47.3633
1372	-47.1802
1372.8	-47.1497
1373.59	-47.2412
1374.4	-47.2107
1375.2	-47.1191
1376	-47.0581
1376.8	-46.9971
1377.59	-47.0276
1378.4	-46.9665
1379.2	-46.9665
1380	-46.875
1380.8	-46.9055
1381.59	-46.875
1382.4	-46.9055
1383.2	-46.875
1384	-46.875
1384.8	-46.8445
1385.59	-46.814
1386.4	-46.7835
1387.2	-46.8445
1388	-46.7835
1388.8	-46.7835
1389.59	-46.8445
1390.4	-46.875
1391.2	-46.814
1392	-46.814
1392.8	-46.7835
1393.59	-46.814
1394.4	-46.936
1395.2	-46.875
1396	-46.9055
1396.8	-46.875
1397.59	-46.875
1398.4	-46.9055
1399.2	-46.875
1400	-46.9055
1400.8	-46.875
1401.59	-46.936
1402.4	-46.9055
1403.2	-46.8445
1404	-46.8445
1404.8	-46.7224
1405.59	-46.7835
1406.4	-46.7529
1407.2	-46.814
1408	-46.7529
1408.8	-46.7224
1409.59	-46.814
1410.4	-46.7835
1411.2	-46.814
1412	-46.8445
1412.8	-46.8445
1413.59	-46.875
1414.4	-46.9971
1415.2	-47.0276
1416	-47.0581
1416.8	-47.1191
1417.59	-47.1191
1418.4	-47.1191
1419.2	-47.1191
1420	-47.1802
1420.8	-47.2107
1421.59	-47.2717
1422.4	-47.3023
1423.2	-47.2412
1424	-47.2412
1424.8	-47.2107
1425.59	-47.2717
1426.4	-47.3328
1427.2	-47.3328
1428	-47.3328
1428.8	-47.2717
1429.59	-47.2717
1430.4	-47.3328
1431.2	-47.3023
1432	-47.2717
1432.8	-47.2412
1433.59	-47.3328
1434.4	-47.3633
1435.2	-47.3328
1436	-47.3328
1436.8	-47.3023
1437.59	-47.3633
1438.4	-47.3328
1439.2	-47.3023
1440	-47.2717
1440.8	-47.3023
1441.59	-47.3633
1442.4	-47.2412
1443.2	-47.3328
1444	-47.2107
1444.8	-47.1802
1445.59	-47.2107
1446.4	-47.2107
1447.2	-47.2107
1448	-47.2107
1448.8	-47.1802
1449.59	-47.1497
1450.4	-47.1191
1451.2	-47.0581
1452	-47.0886
1452.8	-47.0886
1453.59	-47.1191
1454.4	-47.1802
1455.2	-47.2412
1456	-47.2717
1456.8	-47.2412
1457.59	-47.2717
1458.4	-47.2412
1459.2	-47.2717
1460	-47.3328
1460.8	-47.3328
1461.59	-47.4243
1462.4	-47.3938
1463.2	-47.3633
1464	-47.2717
1464.8	-47.3328
1465.59	-47.3938
1466.4	-47.3938
1467.2	-47.4243
1468	-47.4853
1468.8	-47.4853
1469.59	-47.5464
1470.4	-47.5159
1471.2	-47.4548
1472	-47.4548
1472.8	-47.5464
1473.59	-47.5464
1474.4	-47.5464
1475.2	-47.6074
1476	-47.5159
1476.8	-47.5464
1477.59	-47.5464
1478.4	-47.5159
1479.2	-47.5769
1480	-47.5769
1480.8	-47.6379
1481.59	-47.6685
1482.4	-47.6685
1483.2	-47.6685
1484	-47.5769
1484.8	-47.5464
1485.59	-47.5464
1486.4	-47.5769
1487.2	-47.6074
1488	-47.5769
1488.8	-47.5769
1489.59	-47.5769
1490.4	-47.5464
1491.2	-47.4853
1492	-47.4853
1492.8	-47.4243
1493.59	-47.5769
1494.4	-47.6074
1495.2	-47.5464
1496	-47.5769
1496.8	-47.5769
1497.59	-47.6074
1498.4	-47.5769
1499.2	-47.6685
1500	-47.699
1500.8	-47.76
1501.59	-47.76
1502.4	-47.76
1503.2	-47.7905
1504	-47.76
1504.8	-47.7295
1505.59	-47.7905
1506.4	-47.7905
1507.2	-47.8821
1508	-47.8821
1508.8	-47.8516
1509.59	-47.9431
1510.4	-48.0347
1511.2	-48.0652
1512	-48.0957
1512.8	-48.1262
1513.59	-48.1873
1514.4	-48.2788
1515.2	-48.2788
1516	-48.3093
1516.8	-48.3398
1517.59	-48.4314
1518.4	-48.4619
1519.2	-48.4619
1520	-48.523
1520.8	-48.6145
1521.59	-48.6755
1522.4	-48.706
1523.2	-48.706
1524	-48.7366
1524.8	-48.7366
1525.59	-48.7671
1526.4	-48.7671
1527.2	-48.7671
1528	-48.8281
1528.8	-48.8281
1529.59	-48.8586
1530.4	-48.8892
1531.2	-48.8586
1532	-48.8892
1532.8	-48.8586
1533.59	-48.9807
1534.4	-49.0418
1535.2	-49.0418
1536	-49.0418
1536.8	-49.0723
1537.59	-49.0723
1538.4	-49.1028
1539.2	-49.1638
1540	-49.1943
1540.8	-49.2554
1541.59	-49.2249
1542.4	-49.3164
1543.2	-49.3469
1544	-49.3164
1544.8	-49.2859
1545.59	-49.3164
1546.4	-49.2859
1547.2	-49.3164
1548	-49.2859
1548.8	-49.2554
1549.59	-49.2859
1550.4	-49.2554
1551.2	-49.2859
1552	-49.2859
1552.8	-49.2554
1553.59	-49.2859
1554.4	-49.408
1555.2	-49.4385
1556	-49.469
1556.8	-49.408
1557.59	-49.4995
1558.4	-49.469
1559.2	-49.4995
1560	-49.5911
1560.8	-49.5911
1561.59	-49.5605
1562.4	-49.53
1563.2	-49.5911
1564	-49.4995
1564.8	-49.469
1565.59	-49.5605
1566.4	-49.53
1567.2	-49.5605
1568	-49.5911
1568.8	-49.6521
1569.59	-49.6826
1570.4	-49.5605
1571.2	-49.6216
1572	-49.6216
1572.8	-49.6826
1573.59	-49.6826
1574.4	-49.8352
1575.2	-49.8047
1576	-49.8047
1576.8	-49.8352
1577.59	-49.8047
1578.4	-49.8657
1579.2	-49.8352
1580	-49.9573
1580.8	-49.8657
1581.59	-49.9268
1582.4	-49.9268
1583.2	-49.8352
1584	-49.8962
1584.8	-49.8352
1585.59	-49.8047
1586.4	-49.8047
1587.2	-49.8352
1588	-49.8657
1588.8	-49.8352
1589.59	-49.8352
1590.4	-49.8657
1591.2	-49.8352
1592	-49.8047
1592.8	-49.8352
1593.59	-49.8962
1594.4	-49.9268
1595.2	-50.0488
1596	-49.9878
1596.8	-49.9573
1597.59	-49.9573
1598.4	-49.9268
[truncated: 705,106+ more rows]

## Sheet: Figure 3 Eii
ACSF	L703,606	ACSF
-52.89	-57.77	-50.75
-49.22	-53.1	-46.81
-44.37	-48.22	-40.5
-54.5	-59.91	-55.63
-48.01	-53.69	-48.34
-48.68	-53.13	-48.31
