# Supplementary material for: The cation channel mechanisms of subthreshold inward depolarizing currents in the mice VTA dopaminergic neurons and their roles in the chronic-stress-induced depression-like behavior
Source: eLife. 2024 Dec 6;12:RP88319. doi: 10.7554/eLife.88319 (PMC11623934; doi:10.7554/eLife.88319)
Supplement: Figure 3—source data 7. [file elife-88319-fig3-data7.xlsx]

## Sheet: Figure 3 Fi
Example traces						Time-course
ACSF			L703606
Time(ms)	RMP(mV)		Time(ms)	RMP(mV)		Time(min)	Firing rate(Hz)
0	-0.61035		0	-0.76294		0.13973	1.19275
0	-0.73242		0.25	-0.7019		0.27947	0.9542
0.125	-0.61035		0.25	-0.85449		0.4192	1.19275
0.25	-0.73242		0.25	-0.7019		0.55893	1.19275
0.375	-0.76294		0.5	-0.76294		0.69867	1.19275
0.5	-0.64087		0.5	-0.82397		0.8384	1.19275
0.5	-0.67139		0.75	-0.7019		0.97813	1.19275
0.625	-0.73242		0.75	-0.76294		1.11787	1.07347
0.75	-0.57983		0.75	-0.85449		1.2576	1.19275
0.875	-0.7019		1	-0.7019		1.39733	1.19275
1	-0.7019		1	-0.85449		1.53707	1.07347
1	-0.61035		1.25	-0.73242		1.6768	1.31202
1.125	-0.79346		1.25	-0.67139		1.81653	1.19275
1.25	-0.64087		1.25	-0.79346		1.95627	1.07347
1.375	-0.67139		1.5	-0.79346		2.096	1.19275
1.5	-0.79346		1.5	-0.67139		2.23573	1.19275
1.5	-0.73242		1.75	-0.67139		2.37547	1.19275
1.625	-0.67139		1.75	-0.73242		2.5152	1.19275
1.75	-0.82397		1.75	-0.73242		2.65493	0.83492
1.875	-0.7019		2	-0.76294		2.79467	0.4771
2	-0.67139		2	-0.64087		2.9344	0
2	-0.79346		2.25	-0.76294		3.07413	0
2.125	-0.64087		2.25	-0.79346		3.21387	0
2.25	-0.76294		2.25	-0.7019		3.3536	0
2.375	-0.79346		2.5	-0.7019		3.49333	0
2.5	-0.64087		2.5	-0.67139		3.63307	0
2.5	-0.67139		2.75	-0.76294		3.7728	0
2.625	-0.67139		2.75	-0.67139		3.91253	0
2.75	-0.64087		2.75	-0.76294		4.05227	0
2.875	-0.64087		3	-0.7019		4.192	0
3	-0.73242		3	-0.7019		4.33173	0
3	-0.73242		3.25	-0.64087		4.47147	0
3.125	-0.79346		3.25	-0.67139		4.6112	0
3.25	-0.67139		3.25	-0.64087		4.75093	0
3.375	-0.7019		3.5	-0.67139		4.89067	0
3.5	-0.61035		3.5	-0.76294		5.0304	0
3.5	-0.64087		3.75	-0.57983		5.17013	0
3.625	-0.67139		3.75	-0.64087		5.30987	0
3.75	-0.64087		3.75	-0.67139		5.4496	0
3.875	-0.73242		4	-0.61035		5.58933	0
4	-0.64087		4	-0.73242		5.72907	0.11927
4	-0.7019		4.25	-0.67139		5.8688	0
4.125	-0.76294		4.25	-0.57983		6.00853	0
4.25	-0.67139		4.25	-0.7019		6.14827	0
4.375	-0.61035		4.5	-0.7019		6.288	0
4.5	-0.7019		4.5	-0.57983		6.42773	0
4.5	-0.61035		4.75	-0.82397		6.56747	0
4.625	-0.57983		4.75	-0.7019		6.7072	0
4.75	-0.73242		4.75	-0.73242		6.84693	0
4.875	-0.67139		5	-0.82397		6.98667	0
5	-0.67139		5	-0.7019		7.1264	0
5	-0.73242		5.25	-0.73242		7.26613	0
5.125	-0.54932		5.25	-0.76294		7.40587	0
5.25	-0.67139		5.25	-0.67139		7.5456	0
5.375	-0.7019		5.5	-0.7019		7.68533	0
5.5	-0.57983		5.5	-0.76294		7.82507	0
5.5	-0.64087		5.75	-0.61035		7.9648	0
5.625	-0.7019		5.75	-0.73242		8.10453	0
5.75	-0.54932		5.75	-0.82397		8.24427	0.11927
5.875	-0.73242		6	-0.64087		8.384	0.23855
6	-0.7019		6	-0.73242		8.52373	0
6	-0.67139		6.25	-0.73242		8.66347	0
6.125	-0.67139		6.25	-0.76294		8.8032	0
6.25	-0.61035		6.25	-0.79346		8.94293	0
6.375	-0.57983		6.5	-0.73242		9.08267	0
6.5	-0.67139		6.5	-0.7019		9.2224	0
6.5	-0.64087		6.75	-0.79346		9.36213	0.23855
6.625	-0.67139		6.75	-0.61035		9.50187	0.23855
6.75	-0.82397		6.75	-0.73242		9.6416	0.35782
6.875	-0.67139		7	-0.73242		9.78133	0.35782
7	-0.76294		7	-0.76294		9.92107	0.59637
7	-0.76294		7.25	-0.73242		10.0608	0.59637
7.125	-0.73242		7.25	-0.67139		10.2005	0.4771
7.25	-0.7019		7.25	-0.76294		10.3403	0.4771
7.375	-0.73242		7.5	-0.7019		10.48	0.4771
7.5	-0.7019		7.5	-0.79346		10.6197	0.4771
7.5	-0.7019		7.75	-0.73242		10.7595	0.59637
7.625	-0.76294		7.75	-0.73242		10.8992	0.4771
7.75	-0.76294		7.75	-0.67139		11.0389	0.59637
7.875	-0.76294		8	-0.82397		11.1787	0.59637
8	-0.67139		8	-0.73242		11.3184	0.4771
8	-0.79346		8.25	-0.64087		11.4581	0.59637
8.125	-0.79346		8.25	-0.79346		11.5979	0.59637
8.25	-0.76294		8.25	-0.7019		11.7376	0.71565
8.375	-0.79346		8.5	-0.79346		11.8773	0.59637
8.5	-0.7019		8.5	-0.73242		12.0171	0.59637
8.5	-0.82397		8.75	-0.64087		12.1568	0.59637
8.625	-0.79346		8.75	-0.79346		12.2965	0.71565
8.75	-0.73242		8.75	-0.79346		12.4363	0.83492
8.875	-0.76294		9	-0.57983		12.576	0.59637
9	-0.76294		9	-0.67139		12.7157	0.71565
9	-0.67139		9.25	-0.7019		12.8555	0.71565
9.125	-0.85449		9.25	-0.61035		12.9952	0.59637
9.25	-0.73242		9.25	-0.79346		13.1349	0.71565
9.375	-0.67139		9.5	-0.64087		13.2747	0.83492
9.5	-0.82397		9.5	-0.64087		13.4144	0.71565
9.5	-0.61035		9.75	-0.7019		13.5541	0.71565
9.625	-0.73242		9.75	-0.67139		13.6939	0.71565
9.75	-0.7019		9.75	-0.67139		13.8336	0.83492
9.875	-0.61035		10	-0.67139		13.9733	0.83492
10	-0.64087		10	-0.67139
10	-0.79346		10.25	-0.67139
10.125	-0.61035		10.25	-0.79346
10.25	-0.73242		10.25	-0.61035
10.375	-0.85449		10.5	-0.7019
10.5	-0.57983		10.5	-0.7019
10.5	-0.76294		10.75	-0.64087
10.625	-0.7019		10.75	-0.64087
10.75	-0.64087		10.75	-0.61035
10.875	-0.67139		11	-0.64087
11	-0.67139		11	-0.61035
11	-0.61035		11.25	-0.64087
11.125	-0.7019		11.25	-0.61035
11.25	-0.67139		11.25	-0.67139
11.375	-0.64087		11.5	-0.57983
11.5	-0.67139		11.5	-0.73242
11.5	-0.57983		11.75	-0.64087
11.625	-0.7019		11.75	-0.67139
11.75	-0.7019		11.75	-0.67139
11.875	-0.67139		12	-0.57983
12	-0.7019		12	-0.7019
12	-0.67139		12.25	-0.64087
12.125	-0.7019		12.25	-0.64087
12.25	-0.73242		12.25	-0.76294
12.375	-0.64087		12.5	-0.67139
12.5	-0.64087		12.5	-0.57983
12.5	-0.64087		12.75	-0.7019
12.625	-0.64087		12.75	-0.61035
12.75	-0.73242		12.75	-0.57983
12.875	-0.64087		13	-0.76294
13	-0.67139		13	-0.57983
13	-0.76294		13.25	-0.73242
13.125	-0.64087		13.25	-0.67139
13.25	-0.76294		13.25	-0.61035
13.375	-0.79346		13.5	-0.67139
13.5	-0.67139		13.5	-0.79346
13.5	-0.7019		13.75	-0.64087
13.625	-0.7019		13.75	-0.73242
13.75	-0.57983		13.75	-0.79346
13.875	-0.76294		14	-0.61035
14	-0.67139		14	-0.76294
14	-0.67139		14.25	-0.67139
14.125	-0.76294		14.25	-0.67139
14.25	-0.64087		14.25	-0.73242
14.375	-0.79346		14.5	-0.64087
14.5	-0.73242		14.5	-0.64087
14.5	-0.67139		14.75	-0.7019
14.625	-0.67139		14.75	-0.64087
14.75	-0.76294		14.75	-0.7019
14.875	-0.57983		15	-0.79346
15	-0.64087		15	-0.67139
15	-0.82397		15.25	-0.73242
15.125	-0.64087		15.25	-0.64087
15.25	-0.82397		15.25	-0.7019
15.375	-0.73242		15.5	-0.64087
15.5	-0.7019		15.5	-0.67139
15.5	-0.73242		15.75	-0.7019
15.625	-0.76294		15.75	-0.67139
15.75	-0.64087		15.75	-0.73242
15.875	-0.7019		16	-0.76294
16	-0.64087		16	-0.73242
16	-0.64087		16.25	-0.76294
16.125	-0.73242		16.25	-0.79346
16.25	-0.61035		16.25	-0.7019
16.375	-0.73242		16.5	-0.79346
16.5	-0.73242		16.5	-0.73242
16.5	-0.73242		16.75	-0.67139
16.625	-0.7019		16.75	-0.79346
16.75	-0.61035		16.75	-0.67139
16.875	-0.7019		17	-0.5188
17	-0.67139		17	-0.73242
17	-0.64087		17.25	-0.64087
17.125	-0.61035		17.25	-0.57983
17.25	-0.67139		17.25	-0.79346
17.375	-0.67139		17.5	-0.61035
17.5	-0.76294		17.5	-0.67139
17.5	-0.57983		17.75	-0.79346
17.625	-0.57983		17.75	-0.5188
17.75	-0.67139		17.75	-0.7019
17.875	-0.54932		18	-0.7019
18	-0.7019		18	-0.57983
18	-0.67139		18.25	-0.61035
18.125	-0.54932		18.25	-0.67139
18.25	-0.67139		18.25	-0.57983
18.375	-0.76294		18.5	-0.67139
18.5	-0.5188		18.5	-0.76294
18.5	-0.64087		18.75	-0.61035
18.625	-0.64087		18.75	-0.67139
18.75	-0.57983		18.75	-0.61035
18.875	-0.73242		19	-0.67139
19	-0.57983		19	-0.64087
19	-0.61035		19.25	-0.61035
19.125	-0.7019		19.25	-0.64087
19.25	-0.61035		19.25	-0.73242
19.375	-0.7019		19.5	-0.73242
19.5	-0.73242		19.5	-0.7019
19.5	-0.61035		19.75	-0.76294
19.625	-0.67139		19.75	-0.7019
19.75	-0.79346		19.75	-0.76294
19.875	-0.61035		20	-0.67139
20	-0.73242		20	-0.82397
20	-0.67139		20.25	-0.73242
20.125	-0.67139		20.25	-0.67139
20.25	-0.73242		20.25	-0.82397
20.375	-0.7019		20.5	-0.76294
20.5	-0.64087		20.5	-0.73242
20.5	-0.7019		20.75	-0.76294
20.625	-0.7019		20.75	-0.76294
20.75	-0.7019		20.75	-0.79346
20.875	-0.73242		21	-0.85449
21	-0.57983		21	-0.64087
21	-0.7019		21.25	-0.76294
21.125	-0.64087		21.25	-0.79346
21.25	-0.73242		21.25	-0.61035
21.375	-0.73242		21.5	-0.85449
21.5	-0.61035		21.5	-0.76294
21.5	-0.79346		21.75	-0.67139
21.625	-0.73242		21.75	-0.79346
21.75	-0.64087		21.75	-0.79346
21.875	-0.85449		22	-0.7019
22	-0.7019		22	-0.82397
22	-0.61035		22.25	-0.73242
22.125	-0.76294		22.25	-0.79346
22.25	-0.61035		22.25	-0.91553
22.375	-0.64087		22.5	-0.73242
22.5	-0.7019		22.5	-0.76294
22.5	-0.57983		22.75	-0.73242
22.625	-0.76294		22.75	-0.7019
22.75	-0.67139		22.75	-0.73242
22.875	-0.64087		23	-0.76294
23	-0.73242		23	-0.67139
23	-0.79346		23.25	-0.7019
23.125	-0.64087		23.25	-0.73242
23.25	-0.76294		23.25	-0.64087
23.375	-0.7019		23.5	-0.7019
23.5	-0.57983		23.5	-0.61035
23.5	-0.76294		23.75	-0.73242
23.625	-0.61035		23.75	-0.73242
23.75	-0.73242		23.75	-0.73242
23.875	-0.73242		24	-0.7019
24	-0.64087		24	-0.67139
24	-0.67139		24.25	-0.7019
24.125	-0.73242		24.25	-0.7019
24.25	-0.61035		24.25	-0.7019
24.375	-0.73242		24.5	-0.67139
24.5	-0.7019		24.5	-0.7019
24.5	-0.61035		24.75	-0.64087
24.625	-0.64087		24.75	-0.76294
24.75	-0.64087		24.75	-0.67139
24.875	-0.76294		25	-0.57983
25	-0.67139		25	-0.76294
25	-0.67139		25.25	-0.7019
25.125	-0.67139		25.25	-0.7019
25.25	-0.61035		25.25	-0.76294
25.375	-0.61035		25.5	-0.67139
25.5	-0.64087		25.5	-0.64087
25.5	-0.7019		25.75	-0.73242
25.625	-0.64087		25.75	-0.5188
25.75	-0.76294		25.75	-0.67139
25.875	-0.61035		26	-0.7019
26	-0.7019		26	-0.5188
26	-0.67139		26.25	-0.73242
26.125	-0.64087		26.25	-0.73242
26.25	-0.73242		26.25	-0.7019
26.375	-0.7019		26.5	-0.79346
26.5	-0.64087		26.5	-0.76294
26.5	-0.7019		26.75	-0.57983
26.625	-0.73242		26.75	-0.76294
26.75	-0.57983		26.75	-0.73242
26.875	-0.76294		27	-0.67139
27	-0.57983		27	-0.82397
27	-0.7019		27.25	-0.61035
27.125	-0.82397		27.25	-0.82397
27.25	-0.67139		27.25	-0.82397
27.375	-0.82397		27.5	-0.73242
27.5	-0.76294		27.5	-0.73242
27.5	-0.7019		27.75	-0.76294
27.625	-0.76294		27.75	-0.76294
27.75	-0.85449		27.75	-0.76294
27.875	-0.67139		28	-0.7019
28	-0.76294		28	-0.73242
28	-0.82397		28.25	-0.76294
28.125	-0.7019		28.25	-0.7019
28.25	-0.82397		28.25	-0.82397
28.375	-0.73242		28.5	-0.67139
28.5	-0.76294		28.5	-0.7019
28.5	-0.88501		28.75	-0.79346
28.625	-0.79346		28.75	-0.7019
28.75	-0.79346		28.75	-0.76294
28.875	-0.82397		29	-0.67139
29	-0.76294		29	-0.7019
29	-0.79346		29.25	-0.76294
29.125	-0.79346		29.25	-0.73242
29.25	-0.73242		29.25	-0.57983
29.375	-0.76294		29.5	-0.7019
29.5	-0.57983		29.5	-0.67139
29.5	-0.79346		29.75	-0.57983
29.625	-0.67139		29.75	-0.7019
29.75	-0.64087		29.75	-0.57983
29.875	-0.7019		30	-0.61035
30	-0.7019		30	-0.64087
30	-0.64087		30.25	-0.57983
30.125	-0.76294		30.25	-0.54932
30.25	-0.73242		30.25	-0.73242
30.375	-0.73242		30.5	-0.54932
30.5	-0.76294		30.5	-0.64087
30.5	-0.61035		30.75	-0.67139
30.625	-0.73242		30.75	-0.54932
30.75	-0.73242		30.75	-0.67139
30.875	-0.61035		31	-0.61035
31	-0.76294		31	-0.57983
31	-0.67139		31.25	-0.54932
31.125	-0.61035		31.25	-0.57983
31.25	-0.7019		31.25	-0.61035
31.375	-0.73242		31.5	-0.7019
31.5	-0.61035		31.5	-0.61035
31.5	-0.85449		31.75	-0.61035
31.625	-0.61035		31.75	-0.67139
31.75	-0.64087		31.75	-0.57983
31.875	-0.76294		32	-0.64087
32	-0.67139		32	-0.64087
32	-0.79346		32.25	-0.64087
32.125	-0.76294		32.25	-0.57983
32.25	-0.61035		32.25	-0.67139
32.375	-0.67139		32.5	-0.7019
32.5	-0.76294		32.5	-0.67139
32.5	-0.61035		32.75	-0.64087
32.625	-0.73242		32.75	-0.76294
32.75	-0.67139		32.75	-0.76294
32.875	-0.64087		33	-0.7019
33	-0.76294		33	-0.79346
33	-0.73242		33.25	-0.64087
33.125	-0.73242		33.25	-0.61035
33.25	-0.7019		33.25	-0.79346
33.375	-0.7019		33.5	-0.67139
33.5	-0.57983		33.5	-0.73242
33.5	-0.7019		33.75	-0.73242
33.625	-0.64087		33.75	-0.61035
33.75	-0.67139		33.75	-0.7019
33.875	-0.7019		34	-0.76294
34	-0.67139		34	-0.64087
34	-0.76294		34.25	-0.79346
34.125	-0.64087		34.25	-0.73242
34.25	-0.79346		34.25	-0.61035
34.375	-0.7019		34.5	-0.76294
34.5	-0.67139		34.5	-0.64087
34.5	-0.76294		34.75	-0.67139
34.625	-0.67139		34.75	-0.79346
34.75	-0.7019		34.75	-0.73242
34.875	-0.73242		35	-0.67139
35	-0.73242		35	-0.73242
35	-0.73242		35.25	-0.67139
35.125	-0.82397		35.25	-0.67139
35.25	-0.64087		35.25	-0.82397
35.375	-0.82397		35.5	-0.64087
35.5	-0.76294		35.5	-0.76294
35.5	-0.67139		35.75	-0.7019
35.625	-0.79346		35.75	-0.67139
35.75	-0.7019		35.75	-0.7019
35.875	-0.67139		36	-0.67139
36	-0.79346		36	-0.64087
36	-0.76294		36.25	-0.7019
36.125	-0.64087		36.25	-0.7019
36.25	-0.76294		36.25	-0.7019
36.375	-0.67139		36.5	-0.76294
36.5	-0.67139		36.5	-0.64087
36.5	-0.73242		36.75	-0.79346
36.625	-0.54932		36.75	-0.61035
36.75	-0.7019		36.75	-0.7019
36.875	-0.7019		37	-0.64087
37	-0.61035		37	-0.67139
37	-0.61035		37.25	-0.67139
37.125	-0.7019		37.25	-0.61035
37.25	-0.64087		37.25	-0.64087
37.375	-0.7019		37.5	-0.67139
37.5	-0.64087		37.5	-0.7019
37.5	-0.61035		37.75	-0.61035
37.625	-0.67139		37.75	-0.76294
37.75	-0.64087		37.75	-0.64087
37.875	-0.67139		38	-0.61035
38	-0.57983		38	-0.67139
38	-0.61035		38.25	-0.61035
38.125	-0.64087		38.25	-0.7019
38.25	-0.61035		38.25	-0.79346
38.375	-0.67139		38.5	-0.61035
38.5	-0.64087		38.5	-0.7019
38.5	-0.64087		38.75	-0.7019
38.625	-0.7019		38.75	-0.5188
38.75	-0.64087		38.75	-0.73242
38.875	-0.57983		39	-0.76294
39	-0.7019		39	-0.61035
39	-0.57983		39.25	-0.73242
39.125	-0.61035		39.25	-0.73242
39.25	-0.76294		39.25	-0.7019
39.375	-0.67139		39.5	-0.73242
39.5	-0.61035		39.5	-0.67139
39.5	-0.7019		39.75	-0.67139
39.625	-0.61035		39.75	-0.79346
39.75	-0.64087		39.75	-0.7019
39.875	-0.79346		40	-0.7019
40	-0.54932		40	-0.76294
40	-0.7019		40.25	-0.7019
40.125	-0.7019		40.25	-0.79346
40.25	-0.57983		40.25	-0.79346
40.375	-0.79346		40.5	-0.76294
40.5	-0.76294		40.5	-0.76294
40.5	-0.7019		40.75	-0.7019
40.625	-0.73242		40.75	-0.76294
40.75	-0.67139		40.75	-0.79346
40.875	-0.61035		41	-0.76294
41	-0.79346		41	-0.82397
41	-0.67139		41.25	-0.76294
41.125	-0.7019		41.25	-0.67139
41.25	-0.76294		41.25	-0.82397
41.375	-0.67139		41.5	-0.57983
41.5	-0.73242		41.5	-0.7019
41.5	-0.73242		41.75	-0.7019
41.625	-0.79346		41.75	-0.7019
41.75	-0.7019		41.75	-0.79346
41.875	-0.73242		42	-0.7019
42	-0.67139		42	-0.67139
42	-0.64087		42.25	-0.79346
42.125	-0.61035		42.25	-0.85449
42.25	-0.64087		42.25	-0.67139
42.375	-0.7019		42.5	-0.79346
42.5	-0.61035		42.5	-0.67139
42.5	-0.79346		42.75	-0.7019
42.625	-0.7019		42.75	-0.79346
42.75	-0.73242		42.75	-0.64087
42.875	-0.76294		43	-0.7019
43	-0.64087		43	-0.73242
43	-0.67139		43.25	-0.7019
43.125	-0.7019		43.25	-0.7019
43.25	-0.61035		43.25	-0.82397
43.375	-0.73242		43.5	-0.61035
43.5	-0.76294		43.5	-0.64087
43.5	-0.57983		43.75	-0.7019
43.625	-0.79346		43.75	-0.64087
43.75	-0.64087		43.75	-0.7019
43.875	-0.64087		44	-0.61035
44	-0.73242		44	-0.67139
44	-0.64087		44.25	-0.67139
44.125	-0.67139		44.25	-0.67139
44.25	-0.7019		44.25	-0.7019
44.375	-0.7019		44.5	-0.73242
44.5	-0.67139		44.5	-0.64087
44.5	-0.76294		44.75	-0.7019
44.625	-0.57983		44.75	-0.67139
44.75	-0.64087		44.75	-0.67139
44.875	-0.73242		45	-0.79346
45	-0.57983		45	-0.73242
45	-0.79346		45.25	-0.85449
45.125	-0.82397		45.25	-0.76294
45.25	-0.7019		45.25	-0.76294
45.375	-0.79346		45.5	-0.79346
45.5	-0.7019		45.5	-0.79346
45.5	-0.67139		45.75	-0.73242
45.625	-0.7019		45.75	-0.76294
45.75	-0.57983		45.75	-0.73242
45.875	-0.7019		46	-0.61035
46	-0.67139		46	-0.76294
46	-0.57983		46.25	-0.61035
46.125	-0.73242		46.25	-0.82397
46.25	-0.7019		46.25	-0.79346
46.375	-0.7019		46.5	-0.64087
46.5	-0.7019		46.5	-0.76294
46.5	-0.76294		46.75	-0.79346
46.625	-0.76294		46.75	-0.67139
46.75	-0.73242		46.75	-0.73242
46.875	-0.61035		47	-0.79346
47	-0.76294		47	-0.57983
47	-0.76294		47.25	-0.79346
47.125	-0.67139		47.25	-0.7019
47.25	-0.79346		47.25	-0.7019
47.375	-0.7019		47.5	-0.76294
47.5	-0.76294		47.5	-0.67139
47.5	-0.82397		47.75	-0.76294
47.625	-0.7019		47.75	-0.76294
47.75	-0.73242		47.75	-0.73242
47.875	-0.79346		48	-0.67139
48	-0.7019		48	-0.79346
48	-0.67139		48.25	-0.73242
48.125	-0.79346		48.25	-0.73242
48.25	-0.61035		48.25	-0.7019
48.375	-0.85449		48.5	-0.64087
48.5	-0.76294		48.5	-0.79346
48.5	-0.67139		48.75	-0.73242
48.625	-0.79346		48.75	-0.76294
48.75	-0.76294		48.75	-0.73242
48.875	-0.76294		49	-0.67139
49	-0.79346		49	-0.7019
49	-0.73242		49.25	-0.7019
49.125	-0.7019		49.25	-0.67139
49.25	-0.79346		49.25	-0.73242
49.375	-0.7019		49.5	-0.64087
49.5	-0.76294		49.5	-0.76294
49.5	-0.73242		49.75	-0.7019
49.625	-0.57983		49.75	-0.61035
49.75	-0.7019		49.75	-0.73242
49.875	-0.7019		50	-0.73242
50	-0.64087		50	-0.64087
50	-0.67139		50.25	-0.79346
50.125	-0.7019		50.25	-0.67139
50.25	-0.61035		50.25	-0.67139
50.375	-0.76294		50.5	-0.73242
50.5	-0.61035		50.5	-0.67139
50.5	-0.64087		50.75	-0.54932
50.625	-0.7019		50.75	-0.7019
50.75	-0.7019		50.75	-0.48828
50.875	-0.7019		51	-0.7019
51	-0.61035		51	-0.67139
51	-0.7019		51.25	-0.54932
51.125	-0.64087		51.25	-0.7019
51.25	-0.64087		51.25	-0.73242
51.375	-0.76294		51.5	-0.61035
51.5	-0.76294		51.5	-0.7019
51.5	-0.67139		51.75	-0.76294
51.625	-0.73242		51.75	-0.64087
51.75	-0.73242		51.75	-0.79346
51.875	-0.64087		52	-0.57983
52	-0.82397		52	-0.64087
52	-0.7019		52.25	-0.64087
52.125	-0.67139		52.25	-0.64087
52.25	-0.7019		52.25	-0.7019
52.375	-0.67139		52.5	-0.67139
52.5	-0.67139		52.5	-0.64087
52.5	-0.76294		52.75	-0.61035
52.625	-0.64087		52.75	-0.82397
52.75	-0.7019		52.75	-0.76294
52.875	-0.79346		53	-0.76294
53	-0.61035		53	-0.61035
53	-0.79346		53.25	-0.7019
53.125	-0.67139		53.25	-0.67139
53.25	-0.64087		53.25	-0.64087
53.375	-0.7019		53.5	-0.82397
53.5	-0.61035		53.5	-0.73242
53.5	-0.67139		53.75	-0.67139
53.625	-0.67139		53.75	-0.67139
53.75	-0.67139		53.75	-0.73242
53.875	-0.64087		54	-0.7019
54	-0.73242		54	-0.76294
54	-0.64087		54.25	-0.7019
54.125	-0.73242		54.25	-0.76294
54.25	-0.67139		54.25	-0.76294
54.375	-0.64087		54.5	-0.57983
54.5	-0.67139		54.5	-0.76294
54.5	-0.64087		54.75	-0.67139
54.625	-0.7019		54.75	-0.64087
54.75	-0.64087		54.75	-0.79346
54.875	-0.7019		55	-0.67139
55	-0.76294		55	-0.61035
55	-0.67139		55.25	-0.76294
55.125	-0.67139		55.25	-0.67139
55.25	-0.76294		55.25	-0.73242
55.375	-0.82397		55.5	-0.82397
55.5	-0.67139		55.5	-0.73242
55.5	-0.76294		55.75	-0.73242
55.625	-0.67139		55.75	-0.76294
55.75	-0.76294		55.75	-0.64087
55.875	-0.7019		56	-0.7019
56	-0.64087		56	-0.7019
56	-0.7019		56.25	-0.64087
56.125	-0.67139		56.25	-0.67139
56.25	-0.67139		56.25	-0.67139
56.375	-0.82397		56.5	-0.64087
56.5	-0.76294		56.5	-0.76294
56.5	-0.64087		56.75	-0.64087
56.625	-0.76294		56.75	-0.67139
56.75	-0.64087		56.75	-0.67139
56.875	-0.67139		57	-0.67139
57	-0.7019		57	-0.7019
57	-0.54932		57.25	-0.67139
57.125	-0.61035		57.25	-0.7019
57.25	-0.67139		57.25	-0.64087
57.375	-0.54932		57.5	-0.64087
57.5	-0.61035		57.5	-0.67139
57.5	-0.76294		57.75	-0.7019
57.625	-0.5188		57.75	-0.54932
57.75	-0.7019		57.75	-0.76294
57.875	-0.64087		58	-0.67139
58	-0.54932		58	-0.57983
58	-0.7019		58.25	-0.7019
58.125	-0.61035		58.25	-0.67139
58.25	-0.64087		58.25	-0.7019
58.375	-0.67139		58.5	-0.67139
58.5	-0.64087		58.5	-0.5188
58.5	-0.67139		58.75	-0.57983
58.625	-0.7019		58.75	-0.73242
58.75	-0.54932		58.75	-0.64087
58.875	-0.61035		59	-0.7019
59	-0.61035		59	-0.73242
59	-0.64087		59.25	-0.61035
59.125	-0.67139		59.25	-0.76294
59.25	-0.61035		59.25	-0.73242
59.375	-0.67139		59.5	-0.64087
59.5	-0.61035		59.5	-0.67139
59.5	-0.64087		59.75	-0.7019
59.625	-0.7019		59.75	-0.64087
59.75	-0.67139		59.75	-0.73242
59.875	-0.61035		60	-0.73242
60	-0.67139		60	-0.67139
60	-0.67139		60.25	-0.82397
60.125	-0.7019		60.25	-0.7019
60.25	-0.73242		60.25	-0.79346
60.375	-0.61035		60.5	-0.73242
60.5	-0.76294		60.5	-0.7019
60.5	-0.76294		60.75	-0.76294
60.625	-0.61035		60.75	-0.82397
60.75	-0.67139		60.75	-0.79346
60.875	-0.7019		61	-0.7019
61	-0.7019		61	-0.73242
61	-0.79346		61.25	-0.7019
61.125	-0.73242		61.25	-0.76294
61.25	-0.61035		61.25	-0.64087
61.375	-0.82397		61.5	-0.76294
61.5	-0.67139		61.5	-0.7019
61.5	-0.7019		61.75	-0.67139
61.625	-0.82397		61.75	-0.82397
61.75	-0.7019		61.75	-0.73242
61.875	-0.76294		62	-0.82397
62	-0.82397		62	-0.82397
62	-0.67139		62.25	-0.73242
62.125	-0.76294		62.25	-0.76294
62.25	-0.82397		62.25	-0.73242
62.375	-0.64087		62.5	-0.57983
62.5	-0.73242		62.5	-0.76294
62.5	-0.7019		62.75	-0.73242
62.625	-0.61035		62.75	-0.61035
62.75	-0.67139		62.75	-0.82397
62.875	-0.73242		63	-0.61035
63	-0.73242		63	-0.7019
63	-0.76294		63.25	-0.76294
63.125	-0.67139		63.25	-0.67139
63.25	-0.67139		63.25	-0.7019
63.375	-0.73242		63.5	-0.7019
63.5	-0.61035		63.5	-0.61035
63.5	-0.67139		63.75	-0.7019
63.625	-0.7019		63.75	-0.82397
63.75	-0.67139		63.75	-0.7019
63.875	-0.7019		64	-0.85449
64	-0.67139		64	-0.67139
64	-0.76294		64.25	-0.64087
64.125	-0.67139		64.25	-0.73242
64.25	-0.64087		64.25	-0.67139
64.375	-0.7019		64.5	-0.67139
64.5	-0.64087		64.5	-0.7019
64.5	-0.61035		64.75	-0.7019
64.625	-0.7019		64.75	-0.57983
64.75	-0.61035		64.75	-0.76294
64.875	-0.64087		65	-0.64087
65	-0.76294		65	-0.7019
65	-0.64087		65.25	-0.67139
65.125	-0.73242		65.25	-0.67139
65.25	-0.7019		65.25	-0.67139
65.375	-0.54932		65.5	-0.64087
65.5	-0.67139		65.5	-0.7019
65.5	-0.67139		65.75	-0.64087
65.625	-0.54932		65.75	-0.64087
65.75	-0.67139		65.75	-0.64087
65.875	-0.7019		66	-0.61035
66	-0.61035		66	-0.67139
66	-0.79346		66.25	-0.73242
66.125	-0.64087		66.25	-0.73242
66.25	-0.67139		66.25	-0.73242
66.375	-0.73242		66.5	-0.79346
66.5	-0.64087		66.5	-0.7019
66.5	-0.67139		66.75	-0.73242
66.625	-0.73242		66.75	-0.76294
66.75	-0.64087		66.75	-0.61035
66.875	-0.67139		67	-0.73242
67	-0.73242		67	-0.67139
67	-0.7019		67.25	-0.57983
67.125	-0.76294		67.25	-0.64087
67.25	-0.67139		67.25	-0.73242
67.375	-0.79346		67.5	-0.61035
67.5	-0.7019		67.5	-0.79346
67.5	-0.67139		67.75	-0.7019
67.625	-0.76294		67.75	-0.76294
67.75	-0.76294		67.75	-0.76294
67.875	-0.82397		68	-0.7019
68	-0.76294		68	-0.67139
68	-0.79346		68.25	-0.73242
68.125	-0.7019		68.25	-0.64087
68.25	-0.76294		68.25	-0.7019
68.375	-0.79346		68.5	-0.79346
68.5	-0.79346		68.5	-0.67139
68.5	-0.79346		68.75	-0.82397
68.625	-0.7019		68.75	-0.73242
68.75	-0.85449		68.75	-0.7019
68.875	-0.76294		69	-0.73242
69	-0.7019		69	-0.73242
69	-0.76294		69.25	-0.73242
69.125	-0.73242		69.25	-0.7019
69.25	-0.67139		69.25	-0.7019
69.375	-0.79346		69.5	-0.67139
69.5	-0.64087		69.5	-0.79346
69.5	-0.7019		69.75	-0.64087
69.625	-0.79346		69.75	-0.67139
69.75	-0.57983		69.75	-0.7019
69.875	-0.73242		70	-0.7019
70	-0.67139		70	-0.7019
70	-0.64087		70.25	-0.5188
70.125	-0.73242		70.25	-0.7019
70.25	-0.76294		70.25	-0.64087
70.375	-0.64087		70.5	-0.64087
70.5	-0.7019		70.5	-0.64087
70.5	-0.73242		70.75	-0.61035
70.625	-0.61035		70.75	-0.61035
70.75	-0.82397		70.75	-0.76294
70.875	-0.61035		71	-0.61035
71	-0.67139		71	-0.61035
71	-0.73242		71.25	-0.73242
71.125	-0.67139		71.25	-0.54932
71.25	-0.67139		71.25	-0.73242
71.375	-0.76294		71.5	-0.7019
71.5	-0.73242		71.5	-0.54932
71.5	-0.76294		71.75	-0.7019
71.625	-0.76294		71.75	-0.67139
71.75	-0.67139		71.75	-0.57983
71.875	-0.7019		72	-0.7019
72	-0.67139		72	-0.67139
72	-0.64087		72.25	-0.57983
72.125	-0.61035		72.25	-0.73242
72.25	-0.5188		72.25	-0.64087
72.375	-0.67139		72.5	-0.67139
72.5	-0.64087		72.5	-0.76294
72.5	-0.7019		72.75	-0.57983
72.625	-0.7019		72.75	-0.61035
72.75	-0.67139		72.75	-0.76294
72.875	-0.67139		73	-0.7019
73	-0.67139		73	-0.67139
73	-0.57983		73.25	-0.76294
73.125	-0.67139		73.25	-0.67139
73.25	-0.67139		73.25	-0.73242
73.375	-0.5188		73.5	-0.61035
73.5	-0.73242		73.5	-0.67139
73.5	-0.61035		73.75	-0.67139
73.625	-0.61035		73.75	-0.67139
73.75	-0.79346		73.75	-0.73242
73.875	-0.7019		74	-0.7019
74	-0.64087		74	-0.73242
74	-0.79346		74.25	-0.73242
74.125	-0.67139		74.25	-0.76294
74.25	-0.67139		74.25	-0.7019
74.375	-0.82397		74.5	-0.76294
74.5	-0.54932		74.5	-0.57983
74.5	-0.73242		74.75	-0.7019
74.625	-0.7019		74.75	-0.67139
74.75	-0.67139		74.75	-0.57983
74.875	-0.76294		75	-0.73242
75	-0.76294		75	-0.67139
75	-0.64087		75.25	-0.67139
75.125	-0.73242		75.25	-0.73242
75.25	-0.76294		75.25	-0.73242
75.375	-0.7019		75.5	-0.61035
75.5	-0.76294		75.5	-0.7019
75.5	-0.64087		75.75	-0.64087
75.625	-0.7019		75.75	-0.67139
75.75	-0.7019		75.75	-0.85449
75.875	-0.67139		76	-0.57983
76	-0.67139		76	-0.73242
76	-0.73242		76.25	-0.76294
76.125	-0.76294		76.25	-0.64087
76.25	-0.7019		76.25	-0.73242
76.375	-0.76294		76.5	-0.79346
76.5	-0.67139		76.5	-0.61035
76.5	-0.76294		76.75	-0.7019
76.625	-0.67139		76.75	-0.73242
76.75	-0.73242		76.75	-0.64087
76.875	-0.67139		77	-0.79346
77	-0.64087		77	-0.57983
77	-0.82397		77.25	-0.64087
77.125	-0.67139		77.25	-0.67139
77.25	-0.64087		77.25	-0.67139
77.375	-0.7019		77.5	-0.67139
77.5	-0.67139		77.5	-0.7019
77.5	-0.67139		77.75	-0.64087
77.625	-0.7019		77.75	-0.67139
77.75	-0.54932		77.75	-0.7019
77.875	-0.7019		78	-0.61035
78	-0.7019		78	-0.61035
78	-0.54932		78.25	-0.5188
78.125	-0.7019		78.25	-0.7019
78.25	-0.67139		78.25	-0.61035
78.375	-0.61035		78.5	-0.61035
78.5	-0.7019		78.5	-0.73242
78.5	-0.73242		78.75	-0.67139
78.625	-0.61035		78.75	-0.76294
78.75	-0.7019		78.75	-0.76294
78.875	-0.64087		79	-0.67139
79	-0.7019		79	-0.67139
79	-0.79346		79.25	-0.7019
79.125	-0.54932		79.25	-0.57983
79.25	-0.64087		79.25	-0.7019
79.375	-0.73242		79.5	-0.67139
79.5	-0.64087		79.5	-0.54932
79.5	-0.7019		79.75	-0.76294
79.625	-0.7019		79.75	-0.73242
79.75	-0.61035		79.75	-0.7019
79.875	-0.64087		80	-0.73242
80	-0.7019		80	-0.73242
80	-0.61035		80.25	-0.67139
80.125	-0.76294		80.25	-0.76294
80.25	-0.7019		80.25	-0.64087
80.375	-0.76294		80.5	-0.61035
80.5	-0.64087		80.5	-0.79346
80.5	-0.57983		80.75	-0.67139
80.625	-0.7019		80.75	-0.79346
80.75	-0.76294		80.75	-0.76294
80.875	-0.76294		81	-0.73242
81	-0.67139		81	-0.76294
81	-0.7019		81.25	-0.79346
81.125	-0.64087		81.25	-0.7019
81.25	-0.7019		81.25	-0.76294
81.375	-0.64087		81.5	-0.73242
81.5	-0.79346		81.5	-0.73242
81.5	-0.64087		81.75	-0.79346
81.625	-0.57983		81.75	-0.7019
81.75	-0.76294		81.75	-0.73242
81.875	-0.64087		82	-0.64087
82	-0.67139		82	-0.73242
82	-0.7019		82.25	-0.73242
82.125	-0.64087		82.25	-0.67139
82.25	-0.67139		82.25	-0.67139
82.375	-0.79346		82.5	-0.67139
82.5	-0.54932		82.5	-0.76294
82.5	-0.7019		82.75	-0.79346
82.625	-0.79346		82.75	-0.73242
82.75	-0.61035		82.75	-0.7019
82.875	-0.85449		83	-0.79346
83	-0.73242		83	-0.76294
83	-0.64087		83.25	-0.67139
83.125	-0.7019		83.25	-0.85449
83.25	-0.67139		83.25	-0.7019
83.375	-0.57983		83.5	-0.67139
83.5	-0.73242		83.5	-0.73242
83.5	-0.64087		83.75	-0.64087
83.625	-0.67139		83.75	-0.76294
83.75	-0.82397		83.75	-0.76294
83.875	-0.61035		84	-0.57983
84	-0.73242		84	-0.67139
84	-0.73242		84.25	-0.73242
84.125	-0.64087		84.25	-0.57983
84.25	-0.64087		84.25	-0.76294
84.375	-0.7019		84.5	-0.7019
84.5	-0.64087		84.5	-0.7019
84.5	-0.64087		84.75	-0.7019
84.625	-0.64087		84.75	-0.64087
84.75	-0.64087		84.75	-0.61035
84.875	-0.7019		85	-0.76294
85	-0.61035		85	-0.67139
85	-0.7019		85.25	-0.67139
85.125	-0.67139		85.25	-0.79346
85.25	-0.67139		85.25	-0.64087
85.375	-0.7019		85.5	-0.73242
85.5	-0.61035		85.5	-0.64087
85.5	-0.7019		85.75	-0.64087
85.625	-0.64087		85.75	-0.64087
85.75	-0.61035		85.75	-0.67139
85.875	-0.67139		86	-0.61035
86	-0.64087		86	-0.61035
86	-0.57983		86.25	-0.67139
86.125	-0.73242		86.25	-0.73242
86.25	-0.7019		86.25	-0.76294
86.375	-0.67139		86.5	-0.64087
86.5	-0.79346		86.5	-0.79346
86.5	-0.64087		86.75	-0.67139
86.625	-0.67139		86.75	-0.67139
86.75	-0.73242		86.75	-0.7019
86.875	-0.64087		87	-0.64087
87	-0.64087		87	-0.67139
87	-0.76294		87.25	-0.73242
87.125	-0.54932		87.25	-0.64087
87.25	-0.73242		87.25	-0.76294
87.375	-0.82397		87.5	-0.76294
87.5	-0.57983		87.5	-0.64087
87.5	-0.82397		87.75	-0.76294
87.625	-0.79346		87.75	-0.73242
87.75	-0.76294		87.75	-0.64087
87.875	-0.76294		88	-0.79346
88	-0.7019		88	-0.7019
88	-0.67139		88.25	-0.76294
88.125	-0.79346		88.25	-0.82397
88.25	-0.79346		88.25	-0.64087
88.375	-0.82397		88.5	-0.7019
88.5	-0.79346		88.5	-0.79346
88.5	-0.76294		88.75	-0.64087
88.625	-0.76294		88.75	-0.7019
88.75	-0.76294		88.75	-0.76294
88.875	-0.76294		89	-0.61035
89	-0.7019		89	-0.7019
89	-0.73242		89.25	-0.7019
89.125	-0.79346		89.25	-0.67139
89.25	-0.73242		89.25	-0.67139
89.375	-0.76294		89.5	-0.67139
89.5	-0.7019		89.5	-0.64087
89.5	-0.73242		89.75	-0.7019
89.625	-0.64087		89.75	-0.61035
89.75	-0.73242		89.75	-0.64087
89.875	-0.64087		90	-0.73242
90	-0.67139		90	-0.61035
90	-0.73242		90.25	-0.64087
90.125	-0.61035		90.25	-0.67139
90.25	-0.67139		90.25	-0.7019
90.375	-0.7019		90.5	-0.67139
90.5	-0.64087		90.5	-0.64087
90.5	-0.73242		90.75	-0.61035
90.625	-0.73242		90.75	-0.61035
90.75	-0.5188		90.75	-0.67139
90.875	-0.7019		91	-0.7019
91	-0.67139		91	-0.67139
91	-0.64087		91.25	-0.57983
91.125	-0.79346		91.25	-0.73242
91.25	-0.7019		91.25	-0.67139
91.375	-0.67139		91.5	-0.64087
91.5	-0.7019		91.5	-0.7019
91.5	-0.7019		91.75	-0.61035
91.625	-0.7019		91.75	-0.7019
91.75	-0.76294		91.75	-0.67139
91.875	-0.57983		92	-0.54932
92	-0.67139		92	-0.64087
92	-0.73242		92.25	-0.73242
92.125	-0.61035		92.25	-0.54932
92.25	-0.76294		92.25	-0.76294
92.375	-0.7019		92.5	-0.67139
92.5	-0.67139		92.5	-0.57983
92.5	-0.76294		92.75	-0.76294
92.625	-0.73242		92.75	-0.64087
92.75	-0.67139		92.75	-0.76294
92.875	-0.76294		93	-0.73242
93	-0.7019		93	-0.57983
93	-0.67139		93.25	-0.54932
93.125	-0.73242		93.25	-0.7019
93.25	-0.57983		93.25	-0.61035
93.375	-0.73242		93.5	-0.76294
93.5	-0.64087		93.5	-0.76294
93.5	-0.73242		93.75	-0.61035
93.625	-0.67139		93.75	-0.7019
93.75	-0.7019		93.75	-0.67139
93.875	-0.73242		94	-0.73242
94	-0.64087		94	-0.7019
94	-0.64087		94.25	-0.73242
94.125	-0.67139		94.25	-0.64087
94.25	-0.73242		94.25	-0.7019
94.375	-0.57983		94.5	-0.64087
94.5	-0.79346		94.5	-0.67139
94.5	-0.67139		94.75	-0.7019
94.625	-0.7019		94.75	-0.73242
94.75	-0.79346		94.75	-0.79346
94.875	-0.64087		95	-0.57983
95	-0.73242		95	-0.7019
95	-0.76294		95.25	-0.7019
95.125	-0.7019		95.25	-0.64087
95.25	-0.82397		95.25	-0.79346
95.375	-0.82397		95.5	-0.7019
95.5	-0.64087		95.5	-0.64087
95.5	-0.82397		95.75	-0.67139
95.625	-0.79346		95.75	-0.67139
95.75	-0.64087		95.75	-0.57983
95.875	-0.76294		96	-0.73242
96	-0.67139		96	-0.61035
96	-0.76294		96.25	-0.67139
96.125	-0.76294		96.25	-0.73242
96.25	-0.7019		96.25	-0.61035
96.375	-0.7019		96.5	-0.76294
96.5	-0.79346		96.5	-0.7019
96.5	-0.7019		96.75	-0.64087
96.625	-0.73242		96.75	-0.7019
96.75	-0.76294		96.75	-0.76294
96.875	-0.64087		97	-0.61035
97	-0.76294		97	-0.73242
97	-0.73242		97.25	-0.61035
97.125	-0.61035		97.25	-0.57983
97.25	-0.61035		97.25	-0.73242
97.375	-0.67139		97.5	-0.54932
97.5	-0.64087		97.5	-0.64087
97.5	-0.7019		97.75	-0.7019
97.625	-0.64087		97.75	-0.64087
97.75	-0.64087		97.75	-0.7019
97.875	-0.73242		98	-0.73242
98	-0.61035		98	-0.61035
98	-0.7019		98.25	-0.64087
98.125	-0.61035		98.25	-0.7019
98.25	-0.73242		98.25	-0.67139
98.375	-0.67139		98.5	-0.7019
98.5	-0.57983		98.5	-0.54932
98.5	-0.64087		98.75	-0.67139
98.625	-0.54932		98.75	-0.64087
98.75	-0.61035		98.75	-0.7019
98.875	-0.67139		99	-0.67139
99	-0.67139		99	-0.64087
99	-0.57983		99.25	-0.61035
99.125	-0.76294		99.25	-0.7019
99.25	-0.61035		99.25	-0.7019
99.375	-0.64087		99.5	-0.67139
99.5	-0.64087		99.5	-0.7019
99.5	-0.54932		99.75	-0.73242
99.625	-0.73242		99.75	-0.79346
99.75	-0.67139		99.75	-0.73242
99.875	-0.61035		100	-0.64087
100	-0.64087		100	-0.82397
100	-0.76294		100.25	-0.79346
100.125	-0.61035		100.25	-0.76294
100.25	-0.76294		100.25	-0.85449
100.375	-0.76294		100.5	-0.73242
100.5	-0.64087		100.5	-0.7019
100.5	-0.7019		100.75	-0.85449
100.625	-0.61035		100.75	-0.64087
100.75	-0.73242		100.75	-0.73242
100.875	-0.76294		101	-0.73242
101	-0.7019		101	-0.61035
101	-0.64087		101.25	-0.76294
101.125	-0.73242		101.25	-0.79346
101.25	-0.67139		101.25	-0.76294
101.375	-0.73242		101.5	-0.76294
101.5	-0.79346		101.5	-0.85449
101.5	-0.67139		101.75	-0.67139
101.625	-0.79346		101.75	-0.79346
101.75	-0.7019		101.75	-0.73242
101.875	-0.7019		102	-0.7019
102	-0.61035		102	-0.76294
102	-0.67139		102.25	-0.67139
102.125	-0.7019		102.25	-0.73242
102.25	-0.67139		102.25	-0.7019
102.375	-0.7019		102.5	-0.7019
102.5	-0.73242		102.5	-0.67139
102.5	-0.73242		102.75	-0.76294
102.625	-0.67139		102.75	-0.64087
102.75	-0.82397		102.75	-0.7019
102.875	-0.67139		103	-0.67139
103	-0.76294		103	-0.7019
103	-0.67139		103.25	-0.7019
103.125	-0.54932		103.25	-0.61035
103.25	-0.67139		103.25	-0.76294
103.375	-0.64087		103.5	-0.67139
103.5	-0.64087		103.5	-0.67139
103.5	-0.73242		103.75	-0.73242
103.625	-0.7019		103.75	-0.64087
103.75	-0.61035		103.75	-0.67139
103.875	-0.79346		104	-0.76294
104	-0.64087		104	-0.64087
104	-0.64087		104.25	-0.64087
104.125	-0.7019		104.25	-0.76294
104.25	-0.5188		104.25	-0.61035
104.375	-0.7019		104.5	-0.79346
104.5	-0.7019		104.5	-0.7019
104.5	-0.57983		104.75	-0.61035
104.625	-0.67139		104.75	-0.64087
104.75	-0.79346		104.75	-0.61035
104.875	-0.64087		105	-0.61035
105	-0.76294		105	-0.76294
105	-0.73242		105.25	-0.7019
105.125	-0.64087		105.25	-0.67139
105.25	-0.76294		105.25	-0.76294
105.375	-0.7019		105.5	-0.64087
105.5	-0.64087		105.5	-0.7019
105.5	-0.7019		105.75	-0.76294
105.625	-0.73242		105.75	-0.64087
105.75	-0.7019		105.75	-0.67139
105.875	-0.73242		106	-0.73242
106	-0.57983		106	-0.57983
106	-0.64087		106.25	-0.67139
106.125	-0.73242		106.25	-0.73242
106.25	-0.7019		106.25	-0.67139
106.375	-0.7019		106.5	-0.73242
106.5	-0.61035		106.5	-0.67139
106.5	-0.76294		106.75	-0.76294
106.625	-0.67139		106.75	-0.79346
106.75	-0.67139		106.75	-0.67139
106.875	-0.64087		107	-0.76294
107	-0.64087		107	-0.7019
107	-0.7019		107.25	-0.73242
107.125	-0.73242		107.25	-0.76294
107.25	-0.67139		107.25	-0.67139
107.375	-0.64087		107.5	-0.7019
107.5	-0.76294		107.5	-0.73242
107.5	-0.64087		107.75	-0.67139
107.625	-0.76294		107.75	-0.73242
107.75	-0.76294		107.75	-0.73242
107.875	-0.67139		108	-0.64087
108	-0.79346		108	-0.85449
108	-0.76294		108.25	-0.64087
108.125	-0.7019		108.25	-0.61035
108.25	-0.79346		108.25	-0.7019
108.375	-0.79346		108.5	-0.7019
108.5	-0.61035		108.5	-0.73242
108.5	-0.85449		108.75	-0.73242
108.625	-0.67139		108.75	-0.67139
108.75	-0.67139		108.75	-0.73242
108.875	-0.79346		109	-0.85449
109	-0.64087		109	-0.61035
109	-0.79346		109.25	-0.76294
109.125	-0.82397		109.25	-0.7019
109.25	-0.7019		109.25	-0.61035
109.375	-0.7019		109.5	-0.73242
109.5	-0.85449		109.5	-0.67139
109.5	-0.67139		109.75	-0.61035
109.625	-0.76294		109.75	-0.7019
109.75	-0.67139		109.75	-0.67139
109.875	-0.67139		110	-0.61035
110	-0.79346		110	-0.67139
110	-0.7019		110.25	-0.57983
110.125	-0.7019		110.25	-0.64087
110.25	-0.64087		110.25	-0.7019
110.375	-0.67139		110.5	-0.57983
110.5	-0.67139		110.5	-0.64087
110.5	-0.73242		110.75	-0.67139
110.625	-0.61035		110.75	-0.7019
110.75	-0.64087		110.75	-0.64087
110.875	-0.64087		111	-0.73242
111	-0.67139		111	-0.64087
111	-0.73242		111.25	-0.67139
111.125	-0.67139		111.25	-0.64087
111.25	-0.79346		111.25	-0.73242
111.375	-0.73242		111.5	-0.64087
111.5	-0.61035		111.5	-0.54932
111.5	-0.79346		111.75	-0.7019
111.625	-0.73242		111.75	-0.64087
111.75	-0.7019		111.75	-0.7019
111.875	-0.76294		112	-0.64087
112	-0.67139		112	-0.57983
112	-0.67139		112.25	-0.61035
112.125	-0.7019		112.25	-0.73242
112.25	-0.64087		112.25	-0.61035
112.375	-0.79346		112.5	-0.7019
112.5	-0.73242		112.5	-0.67139
112.5	-0.64087		112.75	-0.54932
112.625	-0.76294		112.75	-0.79346
112.75	-0.7019		112.75	-0.67139
112.875	-0.67139		113	-0.64087
113	-0.79346		113	-0.73242
113	-0.76294		113.25	-0.61035
113.125	-0.57983		113.25	-0.64087
113.25	-0.7019		113.25	-0.7019
113.375	-0.64087		113.5	-0.67139
113.5	-0.67139		113.5	-0.7019
113.5	-0.76294		113.75	-0.79346
113.625	-0.67139		113.75	-0.64087
113.75	-0.76294		113.75	-0.73242
113.875	-0.76294		114	-0.7019
114	-0.7019		114	-0.61035
114	-0.7019		114.25	-0.73242
114.125	-0.82397		114.25	-0.73242
114.25	-0.64087		114.25	-0.73242
114.375	-0.76294		114.5	-0.67139
114.5	-0.67139		114.5	-0.67139
114.5	-0.67139		114.75	-0.61035
114.625	-0.79346		114.75	-0.67139
114.75	-0.67139		114.75	-0.64087
114.875	-0.73242		115	-0.73242
115	-0.7019		115	-0.73242
115	-0.76294		115.25	-0.7019
115.125	-0.73242		115.25	-0.7019
115.25	-0.73242		115.25	-0.67139
115.375	-0.73242		115.5	-0.76294
115.5	-0.73242		115.5	-0.7019
115.5	-0.73242		115.75	-0.7019
115.625	-0.67139		115.75	-0.73242
115.75	-0.73242		115.75	-0.73242
115.875	-0.64087		116	-0.7019
116	-0.88501		116	-0.79346
116	-0.7019		116.25	-0.73242
116.125	-0.73242		116.25	-0.67139
116.25	-0.76294		116.25	-0.79346
116.375	-0.73242		116.5	-0.67139
116.5	-0.7019		116.5	-0.76294
116.5	-0.76294		116.75	-0.82397
116.625	-0.64087		116.75	-0.67139
116.75	-0.67139		116.75	-0.85449
116.875	-0.82397		117	-0.76294
117	-0.54932		117	-0.61035
117	-0.73242		117.25	-0.67139
117.125	-0.67139		117.25	-0.73242
117.25	-0.54932		117.25	-0.54932
117.375	-0.7019		117.5	-0.73242
117.5	-0.64087		117.5	-0.61035
117.5	-0.57983		117.75	-0.64087
117.625	-0.61035		117.75	-0.79346
117.75	-0.67139		117.75	-0.67139
117.875	-0.57983		118	-0.64087
118	-0.67139		118	-0.61035
118	-0.57983		118.25	-0.61035
118.125	-0.64087		118.25	-0.61035
118.25	-0.67139		118.25	-0.76294
118.375	-0.64087		118.5	-0.61035
118.5	-0.67139		118.5	-0.67139
118.5	-0.67139		118.75	-0.67139
118.625	-0.61035		118.75	-0.67139
118.75	-0.61035		118.75	-0.7019
118.875	-0.67139		119	-0.64087
119	-0.57983		119	-0.64087
119	-0.67139		119.25	-0.64087
119.125	-0.64087		119.25	-0.73242
119.25	-0.7019		119.25	-0.67139
119.375	-0.7019		119.5	-0.7019
119.5	-0.5188		119.5	-0.67139
119.5	-0.73242		119.75	-0.7019
119.625	-0.7019		119.75	-0.73242
119.75	-0.73242		119.75	-0.73242
119.875	-0.67139		120	-0.76294
120	-0.64087		120	-0.7019
120	-0.64087		120.25	-0.82397
120.125	-0.67139		120.25	-0.7019
120.25	-0.67139		120.25	-0.67139
120.375	-0.7019		120.5	-0.73242
120.5	-0.73242		120.5	-0.73242
120.5	-0.54932		120.75	-0.64087
120.625	-0.76294		120.75	-0.73242
120.75	-0.73242		120.75	-0.76294
120.875	-0.67139		121	-0.7019
121	-0.73242		121	-0.85449
121	-0.7019		121.25	-0.7019
121.125	-0.67139		121.25	-0.79346
121.25	-0.73242		121.25	-0.76294
121.375	-0.7019		121.5	-0.73242
121.5	-0.7019		121.5	-0.88501
121.5	-0.82397		121.75	-0.85449
121.625	-0.64087		121.75	-0.67139
121.75	-0.73242		121.75	-0.76294
121.875	-0.76294		122	-0.85449
122	-0.64087		122	-0.64087
122	-0.76294		122.25	-0.79346
122.125	-0.7019		122.25	-0.7019
122.25	-0.64087		122.25	-0.7019
122.375	-0.7019		122.5	-0.79346
122.5	-0.76294		122.5	-0.73242
122.5	-0.67139		122.75	-0.73242
122.625	-0.76294		122.75	-0.73242
122.75	-0.7019		122.75	-0.73242
122.875	-0.73242		123	-0.76294
123	-0.79346		123	-0.79346
123	-0.67139		123.25	-0.7019
123.125	-0.73242		123.25	-0.79346
123.25	-0.67139		123.25	-0.73242
123.375	-0.67139		123.5	-0.76294
123.5	-0.67139		123.5	-0.73242
123.5	-0.7019		123.75	-0.64087
123.625	-0.67139		123.75	-0.76294
123.75	-0.76294		123.75	-0.73242
123.875	-0.67139		124	-0.73242
124	-0.7019		124	-0.73242
124	-0.73242		124.25	-0.7019
124.125	-0.61035		124.25	-0.61035
124.25	-0.7019		124.25	-0.7019
124.375	-0.67139		124.5	-0.61035
124.5	-0.67139		124.5	-0.67139
124.5	-0.67139		124.75	-0.67139
124.625	-0.67139		124.75	-0.5188
124.75	-0.67139		124.75	-0.73242
124.875	-0.7019		125	-0.61035
125	-0.67139		125	-0.57983
125	-0.7019		125.25	-0.64087
125.125	-0.76294		125.25	-0.7019
125.25	-0.57983		125.25	-0.61035
125.375	-0.76294		125.5	-0.73242
125.5	-0.57983		125.5	-0.7019
125.5	-0.64087		125.75	-0.64087
125.625	-0.76294		125.75	-0.79346
125.75	-0.7019		125.75	-0.61035
125.875	-0.64087		126	-0.7019
126	-0.7019		126	-0.67139
126	-0.67139		126.25	-0.61035
126.125	-0.64087		126.25	-0.61035
126.25	-0.79346		126.25	-0.73242
126.375	-0.61035		126.5	-0.61035
126.5	-0.73242		126.5	-0.7019
126.5	-0.76294		126.75	-0.82397
126.625	-0.67139		126.75	-0.67139
126.75	-0.73242		126.75	-0.79346
126.875	-0.76294		127	-0.67139
127	-0.7019		127	-0.73242
127	-0.79346		127.25	-0.7019
127.125	-0.73242		127.25	-0.64087
127.25	-0.67139		127.25	-0.7019
127.375	-0.76294		127.5	-0.73242
127.5	-0.64087		127.5	-0.76294
127.5	-0.7019		127.75	-0.7019
127.625	-0.79346		127.75	-0.73242
127.75	-0.64087		127.75	-0.61035
127.875	-0.82397		128	-0.67139
128	-0.79346		128	-0.67139
128	-0.79346		128.25	-0.73242
128.125	-0.79346		128.25	-0.67139
128.25	-0.73242		128.25	-0.64087
128.375	-0.85449		128.5	-0.79346
128.5	-0.79346		128.5	-0.73242
128.5	-0.79346		128.75	-0.7019
128.625	-0.85449		128.75	-0.82397
128.75	-0.76294		128.75	-0.76294
128.875	-0.67139		129	-0.7019
129	-0.82397		129	-0.76294
129	-0.7019		129.25	-0.61035
129.125	-0.7019		129.25	-0.7019
129.25	-0.76294		129.25	-0.79346
129.375	-0.7019		129.5	-0.61035
129.5	-0.67139		129.5	-0.73242
129.5	-0.73242		129.75	-0.67139
129.625	-0.64087		129.75	-0.61035
129.75	-0.79346		129.75	-0.7019
129.875	-0.82397		130	-0.7019
130	-0.67139		130	-0.54932
130	-0.79346		130.25	-0.7019
130.125	-0.73242		130.25	-0.7019
130.25	-0.64087		130.25	-0.61035
130.375	-0.76294		130.5	-0.76294
130.5	-0.67139		130.5	-0.61035
130.5	-0.61035		130.75	-0.64087
130.625	-0.7019		130.75	-0.7019
130.75	-0.64087		130.75	-0.61035
130.875	-0.61035		131	-0.64087
131	-0.73242		131	-0.64087
131	-0.61035		131.25	-0.57983
131.125	-0.7019		131.25	-0.67139
131.25	-0.73242		131.25	-0.67139
131.375	-0.64087		131.5	-0.5188
131.5	-0.67139		131.5	-0.64087
131.5	-0.67139		131.75	-0.61035
131.625	-0.67139		131.75	-0.67139
131.75	-0.67139		131.75	-0.64087
131.875	-0.7019		132	-0.64087
132	-0.64087		132	-0.67139
132	-0.67139		132.25	-0.64087
132.125	-0.67139		132.25	-0.7019
132.25	-0.73242		132.25	-0.7019
132.375	-0.7019		132.5	-0.67139
132.5	-0.64087		132.5	-0.64087
132.5	-0.79346		132.75	-0.64087
132.625	-0.73242		132.75	-0.64087
132.75	-0.76294		132.75	-0.76294
132.875	-0.7019		133	-0.73242
133	-0.7019		133	-0.67139
133	-0.73242		133.25	-0.79346
133.125	-0.7019		133.25	-0.67139
133.25	-0.61035		133.25	-0.54932
133.375	-0.73242		133.5	-0.73242
133.5	-0.76294		133.5	-0.67139
133.5	-0.67139		133.75	-0.73242
133.625	-0.82397		133.75	-0.76294
133.75	-0.67139		133.75	-0.57983
133.875	-0.73242		134	-0.64087
134	-0.76294		134	-0.73242
134	-0.7019		134.25	-0.57983
134.125	-0.73242		134.25	-0.88501
134.25	-0.76294		134.25	-0.76294
134.375	-0.67139		134.5	-0.64087
134.5	-0.7019		134.5	-0.7019
134.5	-0.79346		134.75	-0.73242
134.625	-0.61035		134.75	-0.61035
134.75	-0.79346		134.75	-0.73242
134.875	-0.76294		135	-0.73242
135	-0.7019		135	-0.7019
135	-0.79346		135.25	-0.76294
135.125	-0.73242		135.25	-0.64087
135.25	-0.7019		135.25	-0.73242
135.375	-0.79346		135.5	-0.79346
135.5	-0.76294		135.5	-0.76294
135.5	-0.61035		135.75	-0.7019
135.625	-0.79346		135.75	-0.73242
135.75	-0.67139		135.75	-0.7019
135.875	-0.76294		136	-0.64087
136	-0.73242		136	-0.64087
136	-0.67139		136.25	-0.61035
136.125	-0.7019		136.25	-0.67139
136.25	-0.73242		136.25	-0.7019
136.375	-0.79346		136.5	-0.76294
136.5	-0.67139		136.5	-0.7019
136.5	-0.73242		136.75	-0.67139
136.625	-0.67139		136.75	-0.73242
136.75	-0.73242		136.75	-0.67139
136.875	-0.64087		137	-0.64087
137	-0.67139		137	-0.64087
137	-0.7019		137.25	-0.61035
137.125	-0.64087		137.25	-0.67139
137.25	-0.76294		137.25	-0.67139
137.375	-0.57983		137.5	-0.54932
137.5	-0.64087		137.5	-0.67139
137.5	-0.64087		137.75	-0.67139
137.625	-0.61035		137.75	-0.61035
137.75	-0.67139		137.75	-0.73242
137.875	-0.64087		138	-0.67139
138	-0.54932		138	-0.64087
138	-0.67139		138.25	-0.73242
138.125	-0.7019		138.25	-0.73242
138.25	-0.61035		138.25	-0.73242
138.375	-0.73242		138.5	-0.79346
138.5	-0.64087		138.5	-0.64087
138.5	-0.61035		138.75	-0.67139
138.625	-0.7019		138.75	-0.73242
138.75	-0.57983		138.75	-0.61035
138.875	-0.61035		139	-0.73242
139	-0.64087		139	-0.79346
139	-0.61035		139.25	-0.7019
139.125	-0.64087		139.25	-0.76294
139.25	-0.73242		139.25	-0.73242
139.375	-0.5188		139.5	-0.64087
139.5	-0.7019		139.5	-0.79346
139.5	-0.7019		139.75	-0.73242
139.625	-0.61035		139.75	-0.7019
139.75	-0.67139		139.75	-0.76294
139.875	-0.67139		140	-0.67139
140	-0.64087		140	-0.76294
140	-0.67139		140.25	-0.79346
140.125	-0.7019		140.25	-0.73242
140.25	-0.64087		140.25	-0.7019
140.375	-0.79346		140.5	-0.73242
140.5	-0.64087		140.5	-0.76294
140.5	-0.76294		140.75	-0.7019
140.625	-0.76294		140.75	-0.67139
140.75	-0.64087		140.75	-0.76294
140.875	-0.67139		141	-0.76294
141	-0.67139		141	-0.61035
141	-0.76294		141.25	-0.79346
141.125	-0.7019		141.25	-0.67139
141.25	-0.73242		141.25	-0.76294
141.375	-0.73242		141.5	-0.82397
141.5	-0.7019		141.5	-0.73242
141.5	-0.64087		141.75	-0.76294
141.625	-0.7019		141.75	-0.76294
141.75	-0.67139		141.75	-0.73242
141.875	-0.61035		142	-0.79346
142	-0.79346		142	-0.85449
142	-0.64087		142.25	-0.64087
142.125	-0.7019		142.25	-0.79346
142.25	-0.73242		142.25	-0.82397
142.375	-0.67139		142.5	-0.61035
142.5	-0.73242		142.5	-0.79346
142.5	-0.79346		142.75	-0.7019
142.625	-0.57983		142.75	-0.67139
142.75	-0.67139		142.75	-0.73242
142.875	-0.76294		143	-0.67139
143	-0.57983		143	-0.61035
143	-0.79346		143.25	-0.67139
143.125	-0.67139		143.25	-0.61035
143.25	-0.67139		143.25	-0.67139
143.375	-0.73242		143.5	-0.76294
143.5	-0.61035		143.5	-0.61035
143.5	-0.64087		143.75	-0.73242
143.625	-0.73242		143.75	-0.67139
143.75	-0.7019		143.75	-0.67139
143.875	-0.7019		144	-0.7019
144	-0.76294		144	-0.7019
144	-0.64087		144.25	-0.7019
144.125	-0.73242		144.25	-0.73242
144.25	-0.73242		144.25	-0.76294
144.375	-0.64087		144.5	-0.73242
144.5	-0.64087		144.5	-0.76294
144.5	-0.73242		144.75	-0.64087
144.625	-0.7019		144.75	-0.76294
144.75	-0.67139		144.75	-0.7019
144.875	-0.64087		145	-0.67139
145	-0.61035		145	-0.61035
145	-0.7019		145.25	-0.64087
145.125	-0.64087		145.25	-0.76294
145.25	-0.73242		145.25	-0.7019
145.375	-0.73242		145.5	-0.7019
145.5	-0.67139		145.5	-0.73242
145.5	-0.7019		145.75	-0.73242
145.625	-0.67139		145.75	-0.61035
145.75	-0.67139		145.75	-0.79346
145.875	-0.64087		146	-0.64087
146	-0.61035		146	-0.7019
146	-0.79346		146.25	-0.76294
146.125	-0.61035		146.25	-0.64087
146.25	-0.57983		146.25	-0.64087
146.375	-0.76294		146.5	-0.73242
146.5	-0.7019		146.5	-0.7019
146.5	-0.57983		146.75	-0.7019
146.625	-0.76294		146.75	-0.82397
146.75	-0.67139		146.75	-0.64087
146.875	-0.73242		147	-0.76294
147	-0.79346		147	-0.79346
147	-0.57983		147.25	-0.61035
147.125	-0.7019		147.25	-0.76294
147.25	-0.79346		147.25	-0.67139
147.375	-0.67139		147.5	-0.7019
147.5	-0.82397		147.5	-0.73242
147.5	-0.82397		147.75	-0.76294
147.625	-0.61035		147.75	-0.67139
147.75	-0.82397		147.75	-0.76294
147.875	-0.73242		148	-0.7019
148	-0.7019		148	-0.7019
148	-0.76294		148.25	-0.73242
148.125	-0.73242		148.25	-0.67139
148.25	-0.73242		148.25	-0.82397
148.375	-0.82397		148.5	-0.76294
148.5	-0.76294		148.5	-0.73242
148.5	-0.73242		148.75	-0.67139
148.625	-0.85449		148.75	-0.73242
148.75	-0.73242		148.75	-0.73242
148.875	-0.85449		149	-0.67139
149	-0.73242		149	-0.7019
149	-0.67139		149.25	-0.67139
149.125	-0.7019		149.25	-0.73242
149.25	-0.7019		149.25	-0.76294
149.375	-0.79346		149.5	-0.82397
149.5	-0.73242		149.5	-0.7019
149.5	-0.76294		149.75	-0.67139
149.625	-0.73242		149.75	-0.73242
149.75	-0.79346		149.75	-0.64087
149.875	-0.7019		150	-0.73242
150	-0.7019		150	-0.7019
150	-0.57983		150.25	-0.57983
150.125	-0.67139		150.25	-0.7019
150.25	-0.7019		150.25	-0.7019
150.375	-0.64087		150.5	-0.57983
150.5	-0.7019		150.5	-0.67139
150.5	-0.61035		150.75	-0.64087
150.625	-0.64087		150.75	-0.64087
150.75	-0.7019		150.75	-0.76294
150.875	-0.67139		151	-0.57983
151	-0.54932		151	-0.67139
151	-0.76294		151.25	-0.73242
151.125	-0.73242		151.25	-0.67139
151.25	-0.57983		151.25	-0.64087
151.375	-0.79346		151.5	-0.7019
151.5	-0.64087		151.5	-0.54932
151.5	-0.73242		151.75	-0.64087
151.625	-0.73242		151.75	-0.64087
151.75	-0.64087		151.75	-0.54932
151.875	-0.61035		152	-0.67139
152	-0.67139		152	-0.64087
152	-0.61035		152.25	-0.67139
152.125	-0.73242		152.25	-0.67139
152.25	-0.82397		152.25	-0.67139
152.375	-0.64087		152.5	-0.61035
152.5	-0.79346		152.5	-0.67139
152.5	-0.73242		152.75	-0.67139
152.625	-0.67139		152.75	-0.64087
152.75	-0.73242		152.75	-0.67139
152.875	-0.7019		153	-0.64087
153	-0.64087		153	-0.76294
153	-0.67139		153.25	-0.7019
153.125	-0.61035		153.25	-0.76294
153.25	-0.61035		153.25	-0.64087
153.375	-0.76294		153.5	-0.61035
153.5	-0.67139		153.5	-0.67139
153.5	-0.7019		153.75	-0.7019
153.625	-0.67139		153.75	-0.7019
153.75	-0.67139		153.75	-0.79346
153.875	-0.67139		154	-0.79346
154	-0.64087		154	-0.64087
154	-0.7019		154.25	-0.85449
154.125	-0.64087		154.25	-0.67139
154.25	-0.67139		154.25	-0.7019
154.375	-0.73242		154.5	-0.82397
154.5	-0.7019		154.5	-0.67139
154.5	-0.64087		154.75	-0.73242
154.625	-0.7019		154.75	-0.7019
154.75	-0.61035		154.75	-0.64087
154.875	-0.73242		155	-0.79346
155	-0.79346		155	-0.79346
155	-0.64087		155.25	-0.64087
155.125	-0.73242		155.25	-0.76294
155.25	-0.73242		155.25	-0.76294
155.375	-0.64087		155.5	-0.64087
155.5	-0.73242		155.5	-0.79346
155.5	-0.76294		155.75	-0.73242
155.625	-0.57983		155.75	-0.73242
155.75	-0.76294		155.75	-0.82397
155.875	-0.7019		156	-0.7019
156	-0.61035		156	-0.64087
156	-0.79346		156.25	-0.73242
156.125	-0.67139		156.25	-0.61035
156.25	-0.79346		156.25	-0.64087
156.375	-0.76294		156.5	-0.7019
156.5	-0.64087		156.5	-0.67139
156.5	-0.7019		156.75	-0.73242
156.625	-0.76294		156.75	-0.73242
156.75	-0.61035		156.75	-0.76294
156.875	-0.64087		157	-0.67139
157	-0.76294		157	-0.67139
157	-0.57983		157.25	-0.57983
157.125	-0.76294		157.25	-0.61035
157.25	-0.64087		157.25	-0.57983
157.375	-0.61035		157.5	-0.61035
157.5	-0.61035		157.5	-0.61035
157.5	-0.64087		157.75	-0.57983
157.625	-0.67139		157.75	-0.7019
157.75	-0.64087		157.75	-0.54932
157.875	-0.64087		158	-0.7019
158	-0.61035		158	-0.7019
158	-0.7019		158.25	-0.54932
158.125	-0.64087		158.25	-0.64087
158.25	-0.67139		158.25	-0.54932
158.375	-0.64087		158.5	-0.54932
158.5	-0.67139		158.5	-0.64087
158.5	-0.64087		158.75	-0.67139
158.625	-0.54932		158.75	-0.57983
158.75	-0.73242		158.75	-0.79346
158.875	-0.64087		159	-0.57983
159	-0.67139		159	-0.7019
159	-0.64087		159.25	-0.73242
159.125	-0.67139		159.25	-0.61035
159.25	-0.57983		159.25	-0.7019
159.375	-0.73242		159.5	-0.73242
159.5	-0.61035		159.5	-0.7019
159.5	-0.7019		159.75	-0.73242
159.625	-0.73242		159.75	-0.79346
159.75	-0.48828		159.75	-0.64087
159.875	-0.7019		160	-0.79346
160	-0.7019		160	-0.73242
160	-0.67139		160.25	-0.73242
160.125	-0.67139		160.25	-0.79346
160.25	-0.7019		160.25	-0.73242
160.375	-0.5188		160.5	-0.79346
160.5	-0.7019		160.5	-0.73242
160.5	-0.67139		160.75	-0.67139
160.625	-0.64087		160.75	-0.67139
160.75	-0.79346		160.75	-0.79346
160.875	-0.64087		161	-0.73242
161	-0.67139		161	-0.7019
161	-0.76294		161.25	-0.76294
161.125	-0.73242		161.25	-0.7019
161.25	-0.76294		161.25	-0.79346
161.375	-0.82397		161.5	-0.73242
161.5	-0.7019		161.5	-0.82397
161.5	-0.76294		161.75	-0.76294
161.625	-0.76294		161.75	-0.76294
161.75	-0.61035		161.75	-0.82397
161.875	-0.76294		162	-0.76294
162	-0.76294		162	-0.73242
162	-0.73242		162.25	-0.73242
162.125	-0.7019		162.25	-0.73242
162.25	-0.7019		162.25	-0.73242
162.375	-0.73242		162.5	-0.79346
162.5	-0.7019		162.5	-0.54932
162.5	-0.73242		162.75	-0.7019
162.625	-0.76294		162.75	-0.67139
162.75	-0.76294		162.75	-0.61035
162.875	-0.67139		163	-0.76294
163	-0.7019		163	-0.7019
163	-0.61035		163.25	-0.61035
163.125	-0.64087		163.25	-0.73242
163.25	-0.61035		163.25	-0.76294
163.375	-0.64087		163.5	-0.7019
163.5	-0.76294		163.5	-0.76294
163.5	-0.67139		163.75	-0.57983
163.625	-0.7019		163.75	-0.64087
163.75	-0.76294		163.75	-0.73242
163.875	-0.73242		164	-0.61035
164	-0.64087		164	-0.7019
164	-0.76294		164.25	-0.73242
164.125	-0.61035		164.25	-0.76294
164.25	-0.7019		164.25	-0.82397
164.375	-0.79346		164.5	-0.82397
164.5	-0.54932		164.5	-0.64087
164.5	-0.76294		164.75	-0.73242
164.625	-0.67139		164.75	-0.73242
164.75	-0.57983		164.75	-0.67139
164.875	-0.67139		165	-0.7019
165	-0.73242		165	-0.57983
165	-0.57983		165.25	-0.61035
165.125	-0.67139		165.25	-0.57983
165.25	-0.67139		165.25	-0.7019
165.375	-0.61035		165.5	-0.67139
165.5	-0.76294		165.5	-0.73242
165.5	-0.61035		165.75	-0.67139
165.625	-0.61035		165.75	-0.73242
165.75	-0.64087		165.75	-0.73242
165.875	-0.61035		166	-0.76294
166	-0.61035		166	-0.79346
166	-0.7019		166.25	-0.67139
166.125	-0.64087		166.25	-0.7019
166.25	-0.7019		166.25	-0.67139
166.375	-0.79346		166.5	-0.64087
166.5	-0.64087		166.5	-0.79346
166.5	-0.73242		166.75	-0.67139
166.625	-0.61035		166.75	-0.67139
166.75	-0.73242		166.75	-0.79346
166.875	-0.67139		167	-0.73242
167	-0.64087		167	-0.79346
167	-0.67139		167.25	-0.76294
167.125	-0.7019		167.25	-0.61035
167.25	-0.73242		167.25	-0.76294
167.375	-0.79346		167.5	-0.73242
167.5	-0.76294		167.5	-0.67139
167.5	-0.73242		167.75	-0.76294
167.625	-0.79346		167.75	-0.76294
167.75	-0.64087		167.75	-0.7019
167.875	-0.73242		168	-0.79346
168	-0.76294		168	-0.79346
168	-0.67139		168.25	-0.67139
168.125	-0.82397		168.25	-0.85449
168.25	-0.7019		168.25	-0.76294
168.375	-0.73242		168.5	-0.79346
168.5	-0.82397		168.5	-0.79346
168.5	-0.76294		168.75	-0.67139
168.625	-0.73242		168.75	-0.7019
168.75	-0.79346		168.75	-0.76294
168.875	-0.64087		169	-0.73242
169	-0.7019		169	-0.7019
169	-0.79346		169.25	-0.73242
169.125	-0.64087		169.25	-0.7019
169.25	-0.82397		169.25	-0.73242
169.375	-0.79346		169.5	-0.67139
169.5	-0.64087		169.5	-0.64087
169.5	-0.73242		169.75	-0.67139
169.625	-0.76294		169.75	-0.61035
169.75	-0.67139		169.75	-0.67139
169.875	-0.73242		170	-0.61035
170	-0.67139		170	-0.67139
170	-0.61035		170.25	-0.64087
170.125	-0.76294		170.25	-0.64087
170.25	-0.67139		170.25	-0.57983
170.375	-0.73242		170.5	-0.61035
170.5	-0.7019		170.5	-0.54932
170.5	-0.7019		170.75	-0.64087
170.625	-0.7019		170.75	-0.67139
170.75	-0.73242		170.75	-0.48828
170.875	-0.64087		171	-0.73242
171	-0.67139		171	-0.57983
171	-0.76294		171.25	-0.61035
171.125	-0.67139		171.25	-0.7019
171.25	-0.7019		171.25	-0.64087
171.375	-0.64087		171.5	-0.57983
171.5	-0.76294		171.5	-0.73242
171.5	-0.7019		171.75	-0.61035
171.625	-0.7019		171.75	-0.67139
171.75	-0.76294		171.75	-0.7019
171.875	-0.64087		172	-0.54932
172	-0.67139		172	-0.73242
172	-0.82397		172.25	-0.79346
172.125	-0.67139		172.25	-0.61035
172.25	-0.67139		172.25	-0.7019
172.375	-0.76294		172.5	-0.7019
172.5	-0.61035		172.5	-0.61035
172.5	-0.76294		172.75	-0.73242
172.625	-0.67139		172.75	-0.67139
172.75	-0.57983		172.75	-0.61035
172.875	-0.7019		173	-0.7019
173	-0.64087		173	-0.64087
173	-0.61035		173.25	-0.73242
173.125	-0.67139		173.25	-0.73242
173.25	-0.67139		173.25	-0.67139
173.375	-0.67139		173.5	-0.76294
173.5	-0.79346		173.5	-0.67139
173.5	-0.64087		173.75	-0.73242
173.625	-0.67139		173.75	-0.64087
173.75	-0.79346		173.75	-0.7019
173.875	-0.61035		174	-0.7019
174	-0.73242		174	-0.67139
174	-0.67139		174.25	-0.57983
174.125	-0.57983		174.25	-0.67139
174.25	-0.7019		174.25	-0.64087
174.375	-0.73242		174.5	-0.7019
174.5	-0.57983		174.5	-0.82397
174.5	-0.67139		174.75	-0.67139
174.625	-0.73242		174.75	-0.67139
174.75	-0.64087		174.75	-0.7019
174.875	-0.79346		175	-0.67139
175	-0.7019		175	-0.67139
175	-0.7019		175.25	-0.73242
175.125	-0.7019		175.25	-0.61035
175.25	-0.7019		175.25	-0.7019
175.375	-0.64087		175.5	-0.79346
175.5	-0.7019		175.5	-0.57983
175.5	-0.73242		175.75	-0.82397
175.625	-0.73242		175.75	-0.76294
175.75	-0.73242		175.75	-0.73242
175.875	-0.73242		176	-0.79346
176	-0.76294		176	-0.7019
176	-0.7019		176.25	-0.67139
176.125	-0.82397		176.25	-0.73242
176.25	-0.73242		176.25	-0.64087
176.375	-0.67139		176.5	-0.61035
176.5	-0.79346		176.5	-0.79346
176.5	-0.73242		176.75	-0.61035
176.625	-0.67139		176.75	-0.7019
176.75	-0.73242		176.75	-0.76294
176.875	-0.67139		177	-0.64087
177	-0.64087		177	-0.7019
177	-0.79346		177.25	-0.7019
177.125	-0.61035		177.25	-0.61035
177.25	-0.64087		177.25	-0.67139
177.375	-0.7019		177.5	-0.67139
177.5	-0.54932		177.5	-0.61035
177.5	-0.7019		177.75	-0.67139
177.625	-0.61035		177.75	-0.61035
177.75	-0.61035		177.75	-0.64087
177.875	-0.73242		178	-0.61035
178	-0.64087		178	-0.67139
178	-0.61035		178.25	-0.67139
178.125	-0.7019		178.25	-0.67139
178.25	-0.61035		178.25	-0.7019
178.375	-0.64087		178.5	-0.61035
178.5	-0.7019		178.5	-0.64087
178.5	-0.61035		178.75	-0.7019
178.625	-0.67139		178.75	-0.64087
178.75	-0.73242		178.75	-0.54932
178.875	-0.64087		179	-0.7019
179	-0.73242		179	-0.64087
179	-0.73242		179.25	-0.57983
179.125	-0.61035		179.25	-0.73242
179.25	-0.7019		179.25	-0.54932
179.375	-0.67139		179.5	-0.76294
179.5	-0.54932		179.5	-0.73242
179.5	-0.64087		179.75	-0.64087
179.625	-0.61035		179.75	-0.7019
179.75	-0.7019		179.75	-0.76294
179.875	-0.67139		180	-0.67139
180	-0.7019		180	-0.79346
180	-0.64087		180.25	-0.79346
180.125	-0.7019		180.25	-0.57983
180.25	-0.7019		180.25	-0.82397
180.375	-0.7019		180.5	-0.76294
180.5	-0.64087		180.5	-0.73242
180.5	-0.67139		180.75	-0.79346
180.625	-0.73242		180.75	-0.73242
180.75	-0.61035		180.75	-0.73242
180.875	-0.79346		181	-0.79346
181	-0.7019		181	-0.76294
181	-0.7019		181.25	-0.7019
181.125	-0.79346		181.25	-0.85449
181.25	-0.7019		181.25	-0.7019
181.375	-0.76294		181.5	-0.76294
181.5	-0.76294		181.5	-0.73242
181.5	-0.64087		181.75	-0.7019
181.625	-0.67139		181.75	-0.73242
181.75	-0.82397		181.75	-0.67139
181.875	-0.54932		182	-0.79346
182	-0.7019		182	-0.7019
182	-0.73242		182.25	-0.73242
182.125	-0.64087		182.25	-0.7019
182.25	-0.79346		182.25	-0.79346
182.375	-0.79346		182.5	-0.7019
182.5	-0.7019		182.5	-0.7019
182.5	-0.73242		182.75	-0.67139
182.625	-0.73242		182.75	-0.73242
182.75	-0.64087		182.75	-0.79346
182.875	-0.76294		183	-0.73242
183	-0.64087		183	-0.76294
183	-0.67139		183.25	-0.67139
183.125	-0.73242		183.25	-0.61035
183.25	-0.61035		183.25	-0.73242
183.375	-0.73242		183.5	-0.7019
183.5	-0.67139		183.5	-0.61035
183.5	-0.7019		183.75	-0.76294
183.625	-0.64087		183.75	-0.73242
183.75	-0.73242		183.75	-0.61035
183.875	-0.67139		184	-0.73242
184	-0.67139		184	-0.54932
184	-0.64087		184.25	-0.67139
184.125	-0.67139		184.25	-0.7019
184.25	-0.64087		184.25	-0.67139
184.375	-0.61035		184.5	-0.7019
184.5	-0.76294		184.5	-0.73242
184.5	-0.64087		184.75	-0.64087
184.625	-0.7019		184.75	-0.79346
184.75	-0.73242		184.75	-0.82397
184.875	-0.67139		185	-0.57983
185	-0.64087		185	-0.7019
185	-0.61035		185.25	-0.67139
185.125	-0.57983		185.25	-0.64087
185.25	-0.64087		185.25	-0.7019
185.375	-0.73242		185.5	-0.67139
185.5	-0.57983		185.5	-0.67139
185.5	-0.73242		185.75	-0.73242
185.625	-0.61035		185.75	-0.76294
185.75	-0.61035		185.75	-0.76294
185.875	-0.7019		186	-0.79346
186	-0.61035		186	-0.67139
186	-0.64087		186.25	-0.73242
186.125	-0.7019		186.25	-0.64087
186.25	-0.64087		186.25	-0.67139
186.375	-0.64087		186.5	-0.67139
186.5	-0.73242		186.5	-0.67139
186.5	-0.57983		186.75	-0.82397
186.625	-0.7019		186.75	-0.64087
186.75	-0.79346		186.75	-0.7019
186.875	-0.57983		187	-0.73242
187	-0.73242		187	-0.76294
187	-0.7019		187.25	-0.64087
187.125	-0.7019		187.25	-0.76294
187.25	-0.73242		187.25	-0.57983
187.375	-0.73242		187.5	-0.64087
187.5	-0.64087		187.5	-0.76294
187.5	-0.79346		187.75	-0.54932
187.625	-0.64087		187.75	-0.76294
187.75	-0.7019		187.75	-0.73242
187.875	-0.76294		188	-0.7019
188	-0.73242		188	-0.79346
188	-0.82397		188.25	-0.73242
188.125	-0.82397		188.25	-0.7019
188.25	-0.82397		188.25	-0.85449
188.375	-0.79346		188.5	-0.82397
188.5	-0.79346		188.5	-0.7019
188.5	-0.85449		188.75	-0.85449
188.625	-0.79346		188.75	-0.7019
188.75	-0.7019		188.75	-0.76294
188.875	-0.67139		189	-0.85449
189	-0.73242		189	-0.67139
189	-0.67139		189.25	-0.73242
189.125	-0.76294		189.25	-0.85449
189.25	-0.64087		189.25	-0.67139
189.375	-0.67139		189.5	-0.67139
189.5	-0.76294		189.5	-0.73242
189.5	-0.7019		189.75	-0.64087
189.625	-0.76294		189.75	-0.7019
189.75	-0.73242		189.75	-0.57983
189.875	-0.67139		190	-0.61035
190	-0.7019		190	-0.64087
190	-0.76294		190.25	-0.64087
190.125	-0.64087		190.25	-0.64087
190.25	-0.79346		190.25	-0.67139
190.375	-0.7019		190.5	-0.64087
190.5	-0.54932		190.5	-0.7019
190.5	-0.7019		190.75	-0.7019
190.625	-0.64087		190.75	-0.64087
190.75	-0.7019		190.75	-0.7019
190.875	-0.73242		191	-0.64087
191	-0.64087		191	-0.7019
191	-0.61035		191.25	-0.64087
191.125	-0.73242		191.25	-0.57983
191.25	-0.57983		191.25	-0.73242
191.375	-0.7019		191.5	-0.57983
191.5	-0.73242		191.5	-0.57983
191.5	-0.57983		191.75	-0.67139
191.625	-0.7019		191.75	-0.64087
191.75	-0.61035		191.75	-0.61035
191.875	-0.64087		192	-0.73242
192	-0.7019		192	-0.64087
192	-0.73242		192.25	-0.67139
192.125	-0.61035		192.25	-0.76294
192.25	-0.76294		192.25	-0.5188
192.375	-0.7019		192.5	-0.7019
192.5	-0.7019		192.5	-0.73242
192.5	-0.73242		192.75	-0.61035
192.625	-0.57983		192.75	-0.64087
192.75	-0.73242		192.75	-0.7019
192.875	-0.64087		193	-0.54932
193	-0.64087		193	-0.73242
193	-0.57983		193.25	-0.73242
193.125	-0.61035		193.25	-0.64087
193.25	-0.67139		193.25	-0.76294
193.375	-0.7019		193.5	-0.64087
193.5	-0.67139		193.5	-0.7019
193.5	-0.76294		193.75	-0.7019
193.625	-0.79346		193.75	-0.73242
193.75	-0.64087		193.75	-0.7019
193.875	-0.76294		194	-0.79346
194	-0.67139		194	-0.67139
194	-0.67139		194.25	-0.67139
194.125	-0.76294		194.25	-0.67139
194.25	-0.7019		194.25	-0.61035
194.375	-0.73242		194.5	-0.73242
194.5	-0.76294		194.5	-0.64087
194.5	-0.76294		194.75	-0.7019
194.625	-0.82397		194.75	-0.64087
194.75	-0.82397		194.75	-0.64087
194.875	-0.67139		195	-0.67139
195	-0.79346		195	-0.64087
195	-0.82397		195.25	-0.67139
195.125	-0.7019		195.25	-0.67139
195.25	-0.82397		195.25	-0.67139
195.375	-0.76294		195.5	-0.67139
195.5	-0.73242		195.5	-0.73242
195.5	-0.79346		195.75	-0.61035
195.625	-0.73242		195.75	-0.73242
195.75	-0.67139		195.75	-0.7019
195.875	-0.76294		196	-0.61035
196	-0.64087		196	-0.76294
196	-0.76294		196.25	-0.64087
196.125	-0.76294		196.25	-0.64087
196.25	-0.64087		196.25	-0.7019
196.375	-0.73242		196.5	-0.64087
196.5	-0.73242		196.5	-0.54932
196.5	-0.64087		196.75	-0.73242
196.625	-0.61035		196.75	-0.61035
196.75	-0.67139		196.75	-0.7019
196.875	-0.7019		197	-0.76294
197	-0.7019		197	-0.57983
197	-0.57983		197.25	-0.73242
197.125	-0.61035		197.25	-0.7019
197.25	-0.64087		197.25	-0.61035
197.375	-0.67139		197.5	-0.7019
197.5	-0.76294		197.5	-0.73242
197.5	-0.64087		197.75	-0.54932
197.625	-0.7019		197.75	-0.67139
197.75	-0.67139		197.75	-0.64087
197.875	-0.64087		198	-0.64087
198	-0.61035		198	-0.82397
198	-0.61035		198.25	-0.67139
198.125	-0.61035		198.25	-0.67139
198.25	-0.67139		198.25	-0.64087
198.375	-0.7019		198.5	-0.64087
198.5	-0.5188		198.5	-0.64087
198.5	-0.7019		198.75	-0.64087
198.625	-0.61035		198.75	-0.7019
198.75	-0.67139		198.75	-0.64087
198.875	-0.7019		199	-0.7019
199	-0.54932		199	-0.7019
199	-0.64087		199.25	-0.76294
199.125	-0.64087		199.25	-0.64087
199.25	-0.61035		199.25	-0.76294
199.375	-0.67139		199.5	-0.73242
199.5	-0.73242		199.5	-0.67139
199.5	-0.54932		199.75	-0.73242
[truncated: 98,004 more rows]

## Sheet: Figure 3 Fii
ACSF	L703,666	ACSF
1.24	0	0.2
2.63	0	1.76
3.13	0	0.3
4.14	2.5	2.78
2.92	1.52	2.42
2.26	0.46	1.92
1.72	0.62	2.77
0.86	0	0.97
2.74	0.88	1.44
1.32	0	0.18
1.1	0	0
3.8	0	0
1.26	0	1.1
1.07	0	1.43
1.07	0	0.15
1.78	0	0.3
1	0.4	0.96
1.43	0.5	1.07
1.2	0	0.78
0.74	0	0.86
