# Supplementary material for: The cation channel mechanisms of subthreshold inward depolarizing currents in the mice VTA dopaminergic neurons and their roles in the chronic-stress-induced depression-like behavior
Source: eLife. 2024 Dec 6;12:RP88319. doi: 10.7554/eLife.88319 (PMC11623934; doi:10.7554/eLife.88319)
Supplement: Figure 3—source data 8. [file elife-88319-fig3-data8.xlsx]

## Sheet: Sheet1
Con	NALCN-KD
0.7	0.15
1.14	0.33
0.75	0.12
1.9	0.29
0.72	0.48
1.21	0.55
