# Supplementary material for: The cation channel mechanisms of subthreshold inward depolarizing currents in the mice VTA dopaminergic neurons and their roles in the chronic-stress-induced depression-like behavior
Source: eLife. 2024 Dec 6;12:RP88319. doi: 10.7554/eLife.88319 (PMC11623934; doi:10.7554/eLife.88319)
Supplement: Figure 3—source data 9. [file elife-88319-fig3-data9.xlsx]

## Sheet: Figure 3Ii up
con
Time(ms)	RMP(mV)
0	-0.13428
0.0625	-0.13428
0.125	-0.12817
0.15625	-0.12817
0.21875	-0.13123
0.25	-0.13123
0.3125	-0.13123
0.375	-0.12817
0.40625	-0.12512
0.46875	-0.11902
0.5	-0.10986
0.5625	-0.10376
0.625	-0.09155
0.65625	-0.0885
0.71875	-0.09155
0.75	-0.10071
0.8125	-0.09766
0.875	-0.0946
0.90625	-0.09155
0.96875	-0.08545
1	-0.07324
1.0625	-0.07324
1.125	-0.0824
1.15625	-0.0885
1.21875	-0.09766
1.25	-0.09766
1.3125	-0.10376
1.375	-0.0946
1.40625	-0.0885
1.46875	-0.0946
1.5	-0.09766
1.5625	-0.10071
1.625	-0.09766
1.65625	-0.09766
1.71875	-0.0946
1.75	-0.0946
1.8125	-0.08545
1.875	-0.07629
1.90625	-0.07935
1.96875	-0.07019
2	-0.07019
2.0625	-0.07019
2.125	-0.06714
2.15625	-0.06104
2.21875	-0.06714
2.25	-0.06409
2.3125	-0.07019
2.375	-0.06714
2.40625	-0.07324
2.46875	-0.07019
2.5	-0.06714
2.5625	-0.07935
2.625	-0.0885
2.65625	-0.09766
2.71875	-0.09766
2.75	-0.09766
2.8125	-0.07629
2.875	-0.06714
2.90625	-0.06104
2.96875	-0.06104
3	-0.05493
3.0625	-0.06104
3.125	-0.06714
3.15625	-0.07324
3.21875	-0.07629
3.25	-0.07324
3.3125	-0.07629
3.375	-0.06714
3.40625	-0.07324
3.46875	-0.06714
3.5	-0.07019
3.5625	-0.07019
3.625	-0.06104
3.65625	-0.04578
3.71875	-0.03967
3.75	-0.04578
3.8125	-0.05188
3.875	-0.05798
3.90625	-0.05188
3.96875	-0.04272
4	-0.03967
4.0625	-0.05188
4.125	-0.06104
4.15625	-0.07019
4.21875	-0.07324
4.25	-0.08545
4.3125	-0.09155
4.375	-0.0946
4.40625	-0.10681
4.46875	-0.10986
4.5	-0.10986
4.5625	-0.10071
4.625	-0.08545
4.65625	-0.07629
4.71875	-0.07629
4.75	-0.07629
4.8125	-0.08545
4.875	-0.0885
4.90625	-0.0946
4.96875	-0.09766
5	-0.10376
5.0625	-0.10986
5.125	-0.10986
5.15625	-0.10986
5.21875	-0.11597
5.25	-0.11597
5.3125	-0.11597
5.375	-0.10986
5.40625	-0.10376
5.46875	-0.10071
5.5	-0.09155
5.5625	-0.09766
5.625	-0.11902
5.65625	-0.13428
5.71875	-0.13123
5.75	-0.13428
5.8125	-0.12817
5.875	-0.13123
5.90625	-0.12207
5.96875	-0.11597
6	-0.11902
6.0625	-0.13123
6.125	-0.14038
6.15625	-0.14343
6.21875	-0.14954
6.25	-0.15564
6.3125	-0.15564
6.375	-0.14954
6.40625	-0.15564
6.46875	-0.14954
6.5	-0.15564
6.5625	-0.14954
6.625	-0.14954
6.65625	-0.13733
6.71875	-0.14038
6.75	-0.14648
6.8125	-0.1709
6.875	-0.18311
6.90625	-0.18616
6.96875	-0.1709
7	-0.16174
7.0625	-0.14648
7.125	-0.14648
7.15625	-0.13428
7.21875	-0.13123
7.25	-0.12512
7.3125	-0.12817
7.375	-0.12207
7.40625	-0.11902
7.46875	-0.11292
7.5	-0.10986
7.5625	-0.11597
7.625	-0.12512
7.65625	-0.12817
7.71875	-0.12207
7.75	-0.11292
7.8125	-0.09766
7.875	-0.07629
7.90625	-0.05493
7.96875	-0.05188
8	-0.03967
8.0625	-0.04578
8.125	-0.04883
8.15625	-0.05798
8.21875	-0.05798
8.25	-0.05493
8.3125	-0.05493
8.375	-0.05493
8.40625	-0.03967
8.46875	-0.03662
8.5	-0.01831
8.5625	-0.01221
8.625	-0.0061
8.65625	-0.01221
8.71875	-0.00916
8.75	-0.01221
8.8125	-0.0061
8.875	-0.00305
8.90625	0
8.96875	-0.0061
9	0.0061
9.0625	0.01221
9.125	0.03052
9.15625	0.03357
9.21875	0.03357
9.25	0.02441
9.3125	0.01831
9.375	0.00916
9.40625	0.0061
9.46875	0.00916
9.5	0.01221
9.5625	0.01526
9.625	0.01831
9.65625	0.01221
9.71875	0.01221
9.75	0.00916
9.8125	0.01221
9.875	0.00916
9.90625	0.01526
9.96875	0.02136
10	0.02136
10.0625	0.00916
10.125	0.01221
10.1562	0.01526
10.2188	0.01831
10.25	0.01221
10.3125	0.01221
10.375	0.00916
10.4062	0.01221
10.4688	0
10.5	0.00305
10.5625	0.0061
10.625	0.01221
10.6562	0.00916
10.7188	0.00916
10.75	0.0061
10.8125	-0.00305
10.875	-0.0061
10.9062	-0.0061
10.9688	-0.01221
11	-0.0061
11.0625	0.00305
11.125	-0.00305
11.1562	-0.00305
11.2188	-0.0061
11.25	-0.00916
11.3125	-0.02136
11.375	-0.01831
11.4062	-0.01831
11.4688	-0.02136
11.5	-0.02441
11.5625	-0.01831
11.625	-0.01526
11.6562	-0.0061
11.7188	-0.01221
11.75	-0.00916
11.8125	-0.01526
11.875	-0.00916
11.9062	-0.01526
11.9688	-0.0061
12	-0.01526
12.0625	-0.01526
12.125	-0.02747
12.1562	-0.03052
12.2188	-0.02747
12.25	-0.01831
12.3125	-0.01526
12.375	-0.02441
12.4062	-0.03052
12.4688	-0.03662
12.5	-0.03052
12.5625	-0.03357
12.625	-0.03357
12.6562	-0.03052
12.7188	-0.03052
12.75	-0.02747
12.8125	-0.03052
12.875	-0.03052
12.9062	-0.03662
12.9688	-0.03052
13	-0.03357
13.0625	-0.03967
13.125	-0.03662
13.1562	-0.04578
13.2188	-0.05188
13.25	-0.06104
13.3125	-0.05493
13.375	-0.06409
13.4062	-0.07019
13.4688	-0.07019
13.5	-0.07019
13.5625	-0.06409
13.625	-0.06714
13.6562	-0.06714
13.7188	-0.06104
13.75	-0.04883
13.8125	-0.03662
13.875	-0.02747
13.9062	-0.02136
13.9688	-0.02747
14	-0.03967
14.0625	-0.03967
14.125	-0.04578
14.1562	-0.03662
14.2188	-0.02441
14.25	-0.02747
14.3125	-0.02136
14.375	-0.01526
14.4062	-0.00916
14.4688	-0.0061
14.5	-0.00916
14.5625	-0.01221
14.625	-0.03052
14.6562	-0.02747
14.7188	-0.03357
14.75	-0.02747
14.8125	-0.01831
14.875	-0.03357
14.9062	-0.03052
14.9688	-0.01831
15	-0.00305
15.0625	0.0061
15.125	0.01526
15.1562	0.01221
15.2188	-0.01221
15.25	-0.01831
15.3125	-0.01221
15.375	0
15.4062	0
15.4688	-0.00916
15.5	-0.00916
15.5625	-0.00916
15.625	0
15.6562	0.01221
15.7188	0.02441
15.75	0.03052
15.8125	0.02136
15.875	0.02747
15.9062	0.03052
15.9688	0.03052
16	0.02441
16.0625	0.02441
16.125	0.02441
16.1562	0.02441
16.2188	0.03357
16.25	0.03357
16.3125	0.03357
16.375	0.02441
16.4062	0.03662
16.4688	0.04578
16.5	0.05493
16.5625	0.04883
16.625	0.04883
16.6562	0.05493
16.7188	0.05188
16.75	0.05493
16.8125	0.04883
16.875	0.04578
16.9062	0.04272
16.9688	0.04272
17	0.03967
17.0625	0.03662
17.125	0.02747
17.1562	0.02136
17.2188	0.02136
17.25	0.01831
17.3125	0.02136
17.375	0.01526
17.4062	0.01526
17.4688	0.01221
17.5	0.00305
17.5625	-0.01221
17.625	-0.01526
17.6562	-0.01831
17.7188	-0.02136
17.75	-0.02136
17.8125	-0.02441
17.875	-0.03357
17.9062	-0.03967
17.9688	-0.04272
18	-0.04578
18.0625	-0.04272
18.125	-0.04578
18.1562	-0.04272
18.2188	-0.05188
18.25	-0.05188
18.3125	-0.07019
18.375	-0.07935
18.4062	-0.08545
18.4688	-0.0824
18.5	-0.09155
18.5625	-0.09155
18.625	-0.09766
18.6562	-0.10681
18.7188	-0.11597
18.75	-0.12817
18.8125	-0.11597
18.875	-0.11292
18.9062	-0.10681
18.9688	-0.11597
19	-0.12207
19.0625	-0.12512
19.125	-0.12512
19.1562	-0.12817
19.2188	-0.13123
19.25	-0.13428
19.3125	-0.14038
19.375	-0.14343
19.4062	-0.14954
19.4688	-0.14648
19.5	-0.14954
19.5625	-0.14648
19.625	-0.14954
19.6562	-0.14954
19.7188	-0.14954
19.75	-0.14648
19.8125	-0.14954
19.875	-0.15564
19.9062	-0.15259
19.9688	-0.15564
20	-0.14648
20.0625	-0.14648
20.125	-0.13123
20.1562	-0.13428
20.2188	-0.12817
20.25	-0.12512
20.3125	-0.13428
20.375	-0.13733
20.4062	-0.14343
20.4688	-0.13428
20.5	-0.12512
20.5625	-0.11597
20.625	-0.11292
20.6562	-0.09766
20.7188	-0.09766
20.75	-0.0946
20.8125	-0.09766
20.875	-0.0885
20.9062	-0.0885
20.9688	-0.0824
21	-0.0824
21.0625	-0.0946
21.125	-0.10376
21.1562	-0.10986
21.2188	-0.10376
21.25	-0.10681
21.3125	-0.10071
21.375	-0.10376
21.4062	-0.10681
21.4688	-0.11597
21.5	-0.11597
21.5625	-0.10986
21.625	-0.11292
21.6562	-0.10681
21.7188	-0.10376
21.75	-0.0885
21.8125	-0.08545
21.875	-0.07935
21.9062	-0.0824
21.9688	-0.07935
22	-0.08545
22.0625	-0.07324
22.125	-0.07019
22.1562	-0.06714
22.2188	-0.06409
22.25	-0.06409
22.3125	-0.06104
22.375	-0.06714
22.4062	-0.07019
22.4688	-0.07324
22.5	-0.07019
22.5625	-0.07324
22.625	-0.07935
22.6562	-0.08545
22.7188	-0.08545
22.75	-0.08545
22.8125	-0.08545
22.875	-0.09155
22.9062	-0.0885
22.9688	-0.0885
23	-0.08545
23.0625	-0.07629
23.125	-0.06409
23.1562	-0.06409
23.2188	-0.07019
23.25	-0.07935
23.3125	-0.08545
23.375	-0.07629
23.4062	-0.07629
23.4688	-0.07324
23.5	-0.0824
23.5625	-0.08545
23.625	-0.08545
23.6562	-0.0885
23.7188	-0.09155
23.75	-0.0824
23.8125	-0.07935
23.875	-0.07324
23.9062	-0.07935
23.9688	-0.07935
24	-0.08545
24.0625	-0.0824
24.125	-0.0946
24.1562	-0.0946
24.2188	-0.0885
24.25	-0.07935
24.3125	-0.07629
24.375	-0.0824
24.4062	-0.08545
24.4688	-0.0824
24.5	-0.07935
24.5625	-0.0824
24.625	-0.0824
24.6562	-0.0885
24.7188	-0.0885
24.75	-0.10376
24.8125	-0.10376
24.875	-0.10681
24.9062	-0.10376
24.9688	-0.11902
25	-0.11902
25.0625	-0.12207
25.125	-0.10986
25.1562	-0.10071
25.2188	-0.09155
25.25	-0.08545
25.3125	-0.09155
25.375	-0.10071
25.4062	-0.10681
25.4688	-0.11597
25.5	-0.10986
25.5625	-0.11597
25.625	-0.11902
25.6562	-0.12207
25.7188	-0.11597
25.75	-0.11292
25.8125	-0.11292
25.875	-0.12207
25.9062	-0.12817
25.9688	-0.12512
26	-0.12817
26.0625	-0.13733
26.125	-0.15259
26.1562	-0.16174
26.2188	-0.16479
26.25	-0.16785
26.3125	-0.16174
26.375	-0.15564
26.4062	-0.14954
26.4688	-0.14954
26.5	-0.14954
26.5625	-0.15564
26.625	-0.15869
26.6562	-0.14954
26.7188	-0.14648
26.75	-0.14343
26.8125	-0.14038
26.875	-0.14343
26.9062	-0.15564
26.9688	-0.15869
27	-0.15259
27.0625	-0.15259
27.125	-0.14954
27.1562	-0.14648
27.2188	-0.14343
27.25	-0.12817
27.3125	-0.12817
27.375	-0.13428
27.4062	-0.13123
27.4688	-0.13123
27.5	-0.12512
27.5625	-0.12512
27.625	-0.12817
27.6562	-0.11902
27.7188	-0.10681
27.75	-0.0946
27.8125	-0.08545
27.875	-0.07629
27.9062	-0.07935
27.9688	-0.07324
28	-0.07629
28.0625	-0.07935
28.125	-0.0885
28.1562	-0.0824
28.2188	-0.07629
28.25	-0.06104
28.3125	-0.04578
28.375	-0.04272
28.4062	-0.04883
28.4688	-0.04578
28.5	-0.04883
28.5625	-0.03662
28.625	-0.03357
28.6562	-0.03052
28.7188	-0.02747
28.75	-0.01221
28.8125	-0.01221
28.875	-0.00916
28.9062	-0.00916
28.9688	0.00305
29	0.0061
29.0625	0.01526
29.125	0.00916
29.1562	0.0061
29.2188	0.0061
29.25	0.00916
29.3125	0.01221
29.375	0.01831
29.4062	0.02441
29.4688	0.03357
29.5	0.03662
29.5625	0.03967
29.625	0.04272
29.6562	0.05493
29.7188	0.05493
29.75	0.05493
29.8125	0.04883
29.875	0.05188
29.9062	0.05188
29.9688	0.05798
30	0.05493
30.0625	0.04883
30.125	0.03357
30.1562	0.02747
30.2188	0.02136
30.25	0.01221
30.3125	0.00305
30.375	0
30.4062	0
30.4688	0.0061
30.5	0.0061
30.5625	0.01221
30.625	0.00305
30.6562	-0.00305
30.7188	-0.00916
30.75	0.0061
30.8125	0.0061
30.875	0.00305
30.9062	0
30.9688	0.0061
31	0.00305
31.0625	-0.00305
31.125	-0.01221
31.1562	-0.02441
31.2188	-0.02441
31.25	-0.03052
31.3125	-0.03052
31.375	-0.03967
31.4062	-0.03357
31.4688	-0.02747
31.5	-0.01526
31.5625	-0.01526
31.625	-0.00916
31.6562	-0.00916
31.7188	-0.00305
31.75	-0.0061
31.8125	-0.01221
31.875	-0.01526
31.9062	-0.01221
31.9688	-0.02136
32	-0.02747
32.0625	-0.03052
32.125	-0.02136
32.1562	-0.02747
32.2188	-0.03357
32.25	-0.03662
32.3125	-0.03967
32.375	-0.03662
32.4062	-0.03967
32.4688	-0.03357
32.5	-0.03662
32.5625	-0.03662
32.625	-0.05188
32.6562	-0.05798
32.7188	-0.05493
32.75	-0.05493
32.8125	-0.04883
32.875	-0.06104
32.9062	-0.06714
32.9688	-0.07324
33	-0.07019
33.0625	-0.06409
33.125	-0.06409
33.1562	-0.04578
33.2188	-0.03662
33.25	-0.03967
33.3125	-0.04272
33.375	-0.04578
33.4062	-0.03967
33.4688	-0.03052
33.5	-0.02747
33.5625	-0.03052
33.625	-0.03967
33.6562	-0.04578
33.7188	-0.04272
33.75	-0.03967
33.8125	-0.03052
33.875	-0.02441
33.9062	-0.00916
33.9688	-0.01526
34	-0.01831
34.0625	-0.00916
34.125	-0.01221
34.1562	-0.00916
34.2188	-0.0061
34.25	-0.00916
34.3125	-0.01831
34.375	-0.03662
34.4062	-0.04883
34.4688	-0.03662
34.5	-0.02747
34.5625	-0.02747
34.625	-0.03662
34.6562	-0.03357
34.7188	-0.03357
34.75	-0.02747
34.8125	-0.01526
34.875	-0.01221
34.9062	-0.00305
34.9688	0.0061
35	0.01526
35.0625	0.01221
35.125	0.0061
35.1562	0.00305
35.2188	-0.00305
35.25	-0.00916
35.3125	-0.01831
35.375	-0.01526
35.4062	-0.01526
35.4688	-0.00916
35.5	-0.00305
35.5625	0
35.625	0.0061
35.6562	0.01221
35.7188	0.01526
35.75	0.01526
35.8125	0.00305
35.875	0.00916
35.9062	0.01831
35.9688	0.03052
36	0.03662
36.0625	0.03662
36.125	0.02747
36.1562	0.02441
36.2188	0.03967
36.25	0.04272
36.3125	0.05798
36.375	0.06714
36.4062	0.06104
36.4688	0.05798
36.5	0.04578
36.5625	0.04272
36.625	0.04578
36.6562	0.05188
36.7188	0.04578
36.75	0.04578
36.8125	0.05493
36.875	0.05493
36.9062	0.05798
36.9688	0.06104
37	0.05493
37.0625	0.04272
37.125	0.03357
37.1562	0.03052
37.2188	0.02441
37.25	0.02747
37.3125	0.02747
37.375	0.03052
37.4062	0.02747
37.4688	0.03052
37.5	0.02747
37.5625	0.01526
37.625	0.01526
37.6562	0.00305
37.7188	0
37.75	-0.01526
37.8125	-0.03052
37.875	-0.04883
37.9062	-0.04883
37.9688	-0.04272
38	-0.03967
38.0625	-0.03967
38.125	-0.04578
38.1562	-0.04578
38.2188	-0.05493
38.25	-0.06104
38.3125	-0.07019
38.375	-0.07629
38.4062	-0.0885
38.4688	-0.09766
38.5	-0.0885
38.5625	-0.0885
38.625	-0.0824
38.6562	-0.0824
38.7188	-0.08545
38.75	-0.09155
38.8125	-0.09766
38.875	-0.09766
38.9062	-0.0946
38.9688	-0.0946
39	-0.10376
39.0625	-0.10681
39.125	-0.11902
39.1562	-0.12207
39.2188	-0.12512
39.25	-0.12817
39.3125	-0.12817
39.375	-0.13428
39.4062	-0.14038
39.4688	-0.15564
39.5	-0.16174
39.5625	-0.1709
39.625	-0.16479
39.6562	-0.14648
39.7188	-0.13428
39.75	-0.12817
39.8125	-0.14038
39.875	-0.14648
39.9062	-0.15564
39.9688	-0.14954
40	-0.14343
40.0625	-0.13733
40.125	-0.13428
40.1562	-0.13733
40.2188	-0.14343
40.25	-0.14648
40.3125	-0.13428
40.375	-0.12817
40.4062	-0.11597
40.4688	-0.11597
40.5	-0.10986
40.5625	-0.10376
40.625	-0.10071
40.6562	-0.09766
40.7188	-0.10071
40.75	-0.10071
40.8125	-0.09155
40.875	-0.07019
40.9062	-0.06714
40.9688	-0.07019
41	-0.0824
41.0625	-0.09155
41.125	-0.09155
41.1562	-0.0946
41.2188	-0.0946
41.25	-0.09766
41.3125	-0.10071
41.375	-0.10071
41.4062	-0.0946
41.4688	-0.08545
41.5	-0.07935
41.5625	-0.07629
41.625	-0.0824
41.6562	-0.08545
41.7188	-0.0946
41.75	-0.09766
41.8125	-0.10071
41.875	-0.0946
41.9062	-0.09155
41.9688	-0.08545
42	-0.07935
42.0625	-0.07629
42.125	-0.06714
42.1562	-0.07324
42.2188	-0.07629
42.25	-0.07935
42.3125	-0.0824
42.375	-0.07935
42.4062	-0.07935
42.4688	-0.07935
42.5	-0.08545
42.5625	-0.07935
42.625	-0.07935
42.6562	-0.08545
42.7188	-0.0946
42.75	-0.09155
42.8125	-0.08545
42.875	-0.07935
42.9062	-0.08545
42.9688	-0.0885
43	-0.0824
43.0625	-0.08545
43.125	-0.07935
43.1562	-0.07324
43.2188	-0.07629
43.25	-0.07935
43.3125	-0.0824
43.375	-0.08545
43.4062	-0.08545
43.4688	-0.08545
43.5	-0.07935
43.5625	-0.06714
43.625	-0.06714
43.6562	-0.06104
43.7188	-0.06409
43.75	-0.06409
43.8125	-0.06409
43.875	-0.05493
43.9062	-0.05493
43.9688	-0.05493
44	-0.05493
44.0625	-0.05493
44.125	-0.04578
44.1562	-0.05188
44.2188	-0.05798
44.25	-0.07629
44.3125	-0.0824
44.375	-0.09155
44.4062	-0.0824
44.4688	-0.07935
44.5	-0.07935
44.5625	-0.07935
44.625	-0.07629
44.6562	-0.06104
44.7188	-0.05493
44.75	-0.05798
44.8125	-0.07019
44.875	-0.07629
44.9062	-0.08545
44.9688	-0.08545
45	-0.09766
45.0625	-0.10376
45.125	-0.10376
45.1562	-0.10986
45.2188	-0.10986
45.25	-0.10071
45.3125	-0.0885
45.375	-0.0946
45.4062	-0.10376
45.4688	-0.11597
45.5	-0.12817
45.5625	-0.13428
45.625	-0.13733
45.6562	-0.14038
45.7188	-0.13123
45.75	-0.12817
45.8125	-0.11902
45.875	-0.12512
45.9062	-0.12512
45.9688	-0.13123
46	-0.13123
46.0625	-0.14038
46.125	-0.14038
46.1562	-0.14038
46.2188	-0.14038
46.25	-0.14648
46.3125	-0.14648
46.375	-0.14648
46.4062	-0.13733
46.4688	-0.13428
46.5	-0.14038
46.5625	-0.14648
46.625	-0.14954
46.6562	-0.13428
46.7188	-0.13123
46.75	-0.12512
46.8125	-0.13428
46.875	-0.14038
46.9062	-0.14648
46.9688	-0.14343
47	-0.14954
47.0625	-0.14648
47.125	-0.14038
47.1562	-0.13123
47.2188	-0.12207
47.25	-0.11597
47.3125	-0.10681
47.375	-0.09766
47.4062	-0.10071
47.4688	-0.09766
47.5	-0.0946
47.5625	-0.09766
47.625	-0.10681
47.6562	-0.11292
47.7188	-0.10986
47.75	-0.09766
47.8125	-0.08545
47.875	-0.07935
47.9062	-0.07324
47.9688	-0.07019
48	-0.06714
48.0625	-0.06409
48.125	-0.05188
48.1562	-0.04883
48.2188	-0.03967
48.25	-0.05188
48.3125	-0.05188
48.375	-0.04883
48.4062	-0.03662
48.4688	-0.02747
48.5	-0.01831
48.5625	-0.01221
48.625	-0.01221
48.6562	-0.01831
48.7188	-0.01221
48.75	-0.01526
48.8125	-0.01221
48.875	-0.00916
48.9062	0.00305
48.9688	0.01831
49	0.03052
49.0625	0.03357
49.125	0.04272
49.1562	0.04578
49.2188	0.05188
49.25	0.04883
49.3125	0.03662
49.375	0.02441
49.4062	0.02747
49.4688	0.01831
49.5	0.02136
49.5625	0.01526
49.625	0.01831
49.6562	0.02136
49.7188	0.02136
49.75	0.01831
49.8125	0.01221
49.875	0.00916
49.9062	0.01526
49.9688	0.02441
50	0.03662
50.0625	0.02441
50.125	0.02441
50.1562	0.01526
50.2188	0.01831
50.25	0.0061
50.3125	0.00916
50.375	0.00305
50.4062	0.00305
50.4688	0.0061
50.5	0.0061
50.5625	-0.00305
50.625	-0.00916
50.6562	-0.01221
50.7188	-0.01221
50.75	-0.01221
50.8125	-0.01526
50.875	-0.02441
50.9062	-0.02136
50.9688	-0.01526
51	-0.01221
51.0625	-0.02136
51.125	-0.02441
51.1562	-0.01831
51.2188	-0.01831
51.25	-0.02136
51.3125	-0.02136
51.375	-0.03052
51.4062	-0.04578
51.4688	-0.04883
51.5	-0.04578
51.5625	-0.03357
51.625	-0.03662
51.6562	-0.03662
51.7188	-0.03967
51.75	-0.03662
51.8125	-0.03052
51.875	-0.02136
51.9062	-0.02136
51.9688	-0.03357
52	-0.03967
52.0625	-0.03967
52.125	-0.04578
52.1562	-0.04578
52.2188	-0.05493
52.25	-0.05798
52.3125	-0.05493
52.375	-0.04883
52.4062	-0.03967
52.4688	-0.03967
52.5	-0.04272
52.5625	-0.04883
52.625	-0.04883
52.6562	-0.04578
52.7188	-0.03967
52.75	-0.03052
52.8125	-0.03357
52.875	-0.04272
52.9062	-0.04578
52.9688	-0.04883
53	-0.04883
53.0625	-0.05493
53.125	-0.04578
53.1562	-0.04272
53.2188	-0.03967
53.25	-0.03967
53.3125	-0.04883
53.375	-0.05188
53.4062	-0.06104
53.4688	-0.05798
53.5	-0.06714
53.5625	-0.06409
53.625	-0.05188
53.6562	-0.04578
53.7188	-0.04578
53.75	-0.04272
53.8125	-0.03357
53.875	-0.02747
53.9062	-0.03662
53.9688	-0.03052
54	-0.01831
54.0625	-0.01526
54.125	-0.01831
54.1562	-0.03052
54.2188	-0.03357
54.25	-0.03967
54.3125	-0.04272
54.375	-0.03052
54.4062	-0.02136
54.4688	-0.00916
54.5	-0.00305
54.5625	-0.00305
54.625	-0.01221
54.6562	-0.02747
54.7188	-0.02136
54.75	-0.01221
54.8125	-0.0061
54.875	-0.01221
54.9062	-0.00916
54.9688	0
55	0.0061
55.0625	0.01221
55.125	0
55.1562	-0.01526
55.2188	-0.02441
55.25	-0.02136
55.3125	-0.01526
55.375	-0.01221
55.4062	-0.0061
55.4688	-0.00305
55.5	-0.01221
55.5625	-0.01221
55.625	-0.00916
55.6562	-0.00305
55.7188	0
55.75	0.00305
55.8125	0.0061
55.875	0.01221
55.9062	0.01526
55.9688	0.01831
56	0.01831
56.0625	0.02136
56.125	0.02747
56.1562	0.03052
56.2188	0.03967
56.25	0.04883
56.3125	0.04883
56.375	0.05798
56.4062	0.05188
56.4688	0.05188
56.5	0.04578
56.5625	0.04272
56.625	0.04272
56.6562	0.04272
56.7188	0.04578
56.75	0.05493
56.8125	0.07324
56.875	0.07629
56.9062	0.06714
56.9688	0.06409
57	0.04883
57.0625	0.03662
57.125	0.02747
57.1562	0.02747
57.2188	0.02136
57.25	0.02441
57.3125	0.02747
57.375	0.02441
57.4062	0.00916
57.4688	-0.00916
57.5	-0.01221
57.5625	-0.02441
57.625	-0.03357
57.6562	-0.03967
57.7188	-0.03967
57.75	-0.03357
57.8125	-0.02747
57.875	-0.02136
57.9062	-0.02747
57.9688	-0.03967
58	-0.06104
58.0625	-0.06409
58.125	-0.06409
58.1562	-0.06104
58.2188	-0.06409
58.25	-0.06104
58.3125	-0.06714
58.375	-0.06714
58.4062	-0.07019
58.4688	-0.07935
58.5	-0.0824
58.5625	-0.09155
58.625	-0.08545
58.6562	-0.08545
58.7188	-0.0885
58.75	-0.0946
58.8125	-0.10681
58.875	-0.11292
58.9062	-0.11597
58.9688	-0.11597
59	-0.11597
59.0625	-0.12207
59.125	-0.12512
59.1562	-0.11597
59.2188	-0.12207
59.25	-0.11902
59.3125	-0.12817
59.375	-0.13428
59.4062	-0.13733
59.4688	-0.13123
59.5	-0.12512
59.5625	-0.13733
59.625	-0.14038
59.6562	-0.14648
59.7188	-0.14038
59.75	-0.14648
59.8125	-0.14648
59.875	-0.15869
59.9062	-0.16174
59.9688	-0.15564
60	-0.14954
60.0625	-0.14343
60.125	-0.15259
60.1562	-0.15259
60.2188	-0.15259
60.25	-0.14648
60.3125	-0.13428
60.375	-0.12512
60.4062	-0.12207
60.4688	-0.12207
60.5	-0.11292
60.5625	-0.10071
60.625	-0.08545
60.6562	-0.0824
60.7188	-0.07324
60.75	-0.07935
60.8125	-0.0824
60.875	-0.08545
60.9062	-0.09766
60.9688	-0.10376
61	-0.11292
61.0625	-0.10376
61.125	-0.09766
61.1562	-0.0946
61.2188	-0.09155
61.25	-0.0946
61.3125	-0.0946
61.375	-0.09766
61.4062	-0.0885
61.4688	-0.09155
61.5	-0.0885
61.5625	-0.07935
61.625	-0.06104
61.6562	-0.05493
61.7188	-0.05188
61.75	-0.06409
61.8125	-0.07324
61.875	-0.07324
61.9062	-0.07629
61.9688	-0.07324
62	-0.0885
62.0625	-0.08545
62.125	-0.0824
62.1562	-0.07629
62.2188	-0.07629
62.25	-0.0824
62.3125	-0.0885
62.375	-0.08545
62.4062	-0.07324
62.4688	-0.07019
62.5	-0.06714
62.5625	-0.06714
62.625	-0.06104
62.6562	-0.06409
62.7188	-0.05798
62.75	-0.06104
62.8125	-0.06714
62.875	-0.07019
62.9062	-0.07019
62.9688	-0.07019
63	-0.06714
63.0625	-0.07019
63.125	-0.07629
63.1562	-0.07324
63.2188	-0.07324
63.25	-0.06409
63.3125	-0.05188
63.375	-0.05188
63.4062	-0.06409
63.4688	-0.06409
63.5	-0.06409
63.5625	-0.06714
63.625	-0.07019
63.6562	-0.07324
63.7188	-0.07324
63.75	-0.07324
63.8125	-0.06409
63.875	-0.06104
63.9062	-0.06104
63.9688	-0.07324
64	-0.07324
64.0625	-0.07629
64.125	-0.06714
64.1562	-0.07019
64.2188	-0.07629
64.25	-0.0885
64.3125	-0.10376
64.375	-0.10376
64.4062	-0.10071
64.4688	-0.10071
64.5	-0.09766
64.5625	-0.0946
64.625	-0.0946
64.6562	-0.08545
64.7188	-0.0885
64.75	-0.08545
64.8125	-0.0885
64.875	-0.0824
64.9062	-0.08545
64.9688	-0.0824
65	-0.08545
65.0625	-0.0824
65.125	-0.07935
65.1562	-0.0885
65.2188	-0.10071
65.25	-0.10681
65.3125	-0.10986
65.375	-0.11597
65.4062	-0.11292
65.4688	-0.11597
65.5	-0.12207
65.5625	-0.12512
65.625	-0.12207
65.6562	-0.12207
65.7188	-0.11597
65.75	-0.12512
65.8125	-0.12817
65.875	-0.14648
65.9062	-0.15564
65.9688	-0.16479
66	-0.16174
66.0625	-0.16785
66.125	-0.16479
66.1562	-0.16174
66.2188	-0.15564
66.25	-0.15564
66.3125	-0.15259
66.375	-0.15564
66.4062	-0.16174
66.4688	-0.1709
66.5	-0.17395
66.5625	-0.16785
66.625	-0.15564
66.6562	-0.14038
66.7188	-0.13123
66.75	-0.12512
66.8125	-0.12817
66.875	-0.13733
66.9062	-0.14343
66.9688	-0.14648
67	-0.14038
67.0625	-0.13733
67.125	-0.14038
67.1562	-0.14648
67.2188	-0.14648
67.25	-0.14648
67.3125	-0.14954
67.375	-0.14343
67.4062	-0.13428
67.4688	-0.12817
67.5	-0.12512
67.5625	-0.11902
67.625	-0.11292
67.6562	-0.11292
67.7188	-0.11902
67.75	-0.11597
67.8125	-0.10681
67.875	-0.09766
67.9062	-0.08545
67.9688	-0.07629
68	-0.07629
68.0625	-0.06409
68.125	-0.06104
68.1562	-0.06409
68.2188	-0.06409
68.25	-0.06104
68.3125	-0.04578
68.375	-0.03662
68.4062	-0.03052
68.4688	-0.03662
68.5	-0.03357
68.5625	-0.02747
68.625	-0.01526
68.6562	-0.01221
68.7188	-0.01221
68.75	-0.01221
68.8125	-0.01526
68.875	-0.01526
68.9062	-0.01221
68.9688	-0.01221
69	-0.00916
69.0625	-0.0061
69.125	-0.0061
69.1562	-0.01221
69.2188	-0.01831
69.25	-0.01221
69.3125	0.00305
69.375	0.0061
69.4062	0.01221
69.4688	0.01221
69.5	0.01221
69.5625	0
69.625	-0.00305
69.6562	0.00916
69.7188	0.02441
69.75	0.03052
69.8125	0.03357
69.875	0.03357
69.9062	0.03662
69.9688	0.03662
70	0.02441
70.0625	0.00916
70.125	-0.0061
70.1562	0.01221
70.2188	0.01526
70.25	0.01221
70.3125	-0.0061
70.375	-0.0061
70.4062	-0.01221
70.4688	-0.00916
70.5	-0.00916
70.5625	0.00305
70.625	0.0061
70.6562	0.01526
70.7188	0.00305
70.75	-0.00916
70.8125	-0.01221
70.875	-0.01526
70.9062	-0.02441
70.9688	-0.03662
71	-0.03357
71.0625	-0.02441
71.125	-0.01221
71.1562	-0.0061
71.2188	-0.00305
71.25	-0.01526
71.3125	-0.01221
71.375	-0.01526
71.4062	-0.0061
71.4688	-0.00916
71.5	0
71.5625	-0.00916
71.625	-0.01831
71.6562	-0.03662
71.7188	-0.02747
71.75	-0.02441
71.8125	-0.02136
71.875	-0.02136
71.9062	-0.02136
71.9688	-0.02136
72	-0.02136
72.0625	-0.03357
72.125	-0.03052
72.1562	-0.03357
72.2188	-0.03052
72.25	-0.05188
72.3125	-0.06104
72.375	-0.06104
72.4062	-0.04578
72.4688	-0.03662
72.5	-0.03357
72.5625	-0.03662
72.625	-0.05798
72.6562	-0.07019
72.7188	-0.07019
72.75	-0.07019
72.8125	-0.05798
72.875	-0.05493
72.9062	-0.05188
72.9688	-0.06104
73	-0.06714
73.0625	-0.06409
73.125	-0.05188
73.1562	-0.04272
73.2188	-0.03967
73.25	-0.03967
73.3125	-0.04578
73.375	-0.05188
73.4062	-0.04883
73.4688	-0.04883
73.5	-0.03662
73.5625	-0.04578
73.625	-0.04883
73.6562	-0.05188
73.7188	-0.05188
73.75	-0.04272
73.8125	-0.03967
73.875	-0.03662
73.9062	-0.02747
73.9688	-0.02441
74	-0.02136
74.0625	-0.03357
74.125	-0.03357
74.1562	-0.02747
74.2188	-0.02747
74.25	-0.02747
74.3125	-0.03052
74.375	-0.03052
74.4062	-0.03052
74.4688	-0.04578
74.5	-0.05493
74.5625	-0.05798
74.625	-0.04883
74.6562	-0.04272
74.7188	-0.04883
74.75	-0.04272
74.8125	-0.03967
74.875	-0.03052
74.9062	-0.03662
74.9688	-0.03052
75	-0.02441
75.0625	-0.02747
75.125	-0.03052
75.1562	-0.03052
75.2188	-0.02136
75.25	-0.00305
75.3125	0
75.375	0
75.4062	0
75.4688	0.00305
75.5	0.01526
75.5625	0.02136
75.625	0.02136
75.6562	0.01831
75.7188	0.02136
75.75	0.03357
75.8125	0.03357
75.875	0.03052
75.9062	0.02747
75.9688	0.03052
76	0.03052
76.0625	0.02441
76.125	0.02441
76.1562	0.02136
76.2188	0.01831
76.25	0.00916
76.3125	0.00916
76.375	0.01526
76.4062	0.02441
76.4688	0.04272
76.5	0.04272
76.5625	0.03967
76.625	0.03052
76.6562	0.02441
76.7188	0.02441
76.75	0.01831
76.8125	0.02136
76.875	0.00916
76.9062	0.0061
76.9688	0.00305
77	0.0061
77.0625	0.01221
77.125	0.00916
77.1562	0.0061
77.2188	0.00305
77.25	0.01526
77.3125	0.01831
77.375	0.01526
77.4062	0.00916
77.4688	0.00305
77.5	0.00916
77.5625	-0.0061
77.625	-0.01526
77.6562	-0.03052
77.7188	-0.04272
77.75	-0.04272
77.8125	-0.05188
77.875	-0.05798
77.9062	-0.06409
77.9688	-0.06714
78	-0.07019
78.0625	-0.07019
78.125	-0.06714
78.1562	-0.06714
78.2188	-0.07019
78.25	-0.07935
78.3125	-0.0824
78.375	-0.0946
78.4062	-0.09155
78.4688	-0.09766
78.5	-0.09766
78.5625	-0.10376
78.625	-0.10071
78.6562	-0.10681
78.7188	-0.10986
78.75	-0.10986
78.8125	-0.11597
78.875	-0.11597
78.9062	-0.11597
78.9688	-0.11902
79	-0.12817
79.0625	-0.14954
79.125	-0.15869
79.1562	-0.16174
79.2188	-0.15869
79.25	-0.16174
79.3125	-0.14954
79.375	-0.14038
79.4062	-0.12512
79.4688	-0.11902
79.5	-0.11292
79.5625	-0.10376
79.625	-0.10681
79.6562	-0.10681
79.7188	-0.12207
79.75	-0.12512
79.8125	-0.12817
79.875	-0.13428
79.9062	-0.13123
79.9688	-0.13733
80	-0.12207
80.0625	-0.12817
80.125	-0.10986
80.1562	-0.10681
80.2188	-0.10681
80.25	-0.10986
80.3125	-0.11597
80.375	-0.11902
80.4062	-0.12817
80.4688	-0.12207
80.5	-0.12207
80.5625	-0.11597
80.625	-0.10376
80.6562	-0.10071
80.7188	-0.09766
80.75	-0.10376
80.8125	-0.10376
80.875	-0.10986
80.9062	-0.10681
80.9688	-0.11597
81	-0.10986
81.0625	-0.10376
81.125	-0.10071
81.1562	-0.09766
81.2188	-0.09766
81.25	-0.09766
81.3125	-0.0946
81.375	-0.10071
81.4062	-0.10376
81.4688	-0.10071
81.5	-0.0885
81.5625	-0.08545
81.625	-0.07935
81.6562	-0.09155
81.7188	-0.09155
81.75	-0.0885
81.8125	-0.06714
81.875	-0.06104
81.9062	-0.05188
81.9688	-0.05493
82	-0.05493
82.0625	-0.07019
82.125	-0.0824
82.1562	-0.0824
82.2188	-0.0824
82.25	-0.07935
82.3125	-0.07935
82.375	-0.07629
82.4062	-0.07019
82.4688	-0.06104
82.5	-0.06104
82.5625	-0.06409
82.625	-0.06714
82.6562	-0.06714
82.7188	-0.05493
82.75	-0.05493
82.8125	-0.05188
82.875	-0.05798
82.9062	-0.05493
82.9688	-0.05798
83	-0.05188
83.0625	-0.04272
83.125	-0.04883
83.1562	-0.05493
83.2188	-0.05798
83.25	-0.04578
83.3125	-0.04272
83.375	-0.02136
83.4062	-0.02747
83.4688	-0.03967
83.5	-0.04578
83.5625	-0.04578
83.625	-0.04578
83.6562	-0.05493
83.7188	-0.06104
83.75	-0.07019
83.8125	-0.06409
83.875	-0.06409
83.9062	-0.05188
83.9688	-0.05798
84	-0.05798
84.0625	-0.06409
84.125	-0.06714
84.1562	-0.07019
84.2188	-0.06714
84.25	-0.07019
84.3125	-0.07629
84.375	-0.07935
84.4062	-0.09155
84.4688	-0.0885
84.5	-0.0885
84.5625	-0.0885
84.625	-0.0885
84.6562	-0.0885
84.7188	-0.0885
84.75	-0.07629
84.8125	-0.06714
84.875	-0.07019
84.9062	-0.07629
84.9688	-0.08545
85	-0.08545
85.0625	-0.07629
85.125	-0.07629
85.1562	-0.07935
85.2188	-0.07935
85.25	-0.08545
85.3125	-0.07935
85.375	-0.0885
85.4062	-0.0885
85.4688	-0.10376
85.5	-0.10071
85.5625	-0.10376
85.625	-0.09766
85.6562	-0.10071
85.7188	-0.10376
85.75	-0.10986
85.8125	-0.11902
85.875	-0.11902
85.9062	-0.13733
85.9688	-0.14038
86	-0.14648
86.0625	-0.13733
86.125	-0.13733
86.1562	-0.13733
86.2188	-0.14343
86.25	-0.13428
86.3125	-0.13123
86.375	-0.12817
86.4062	-0.14343
86.4688	-0.15564
86.5	-0.16174
86.5625	-0.16174
86.625	-0.15869
86.6562	-0.16174
86.7188	-0.15259
86.75	-0.14343
86.8125	-0.14038
86.875	-0.14038
86.9062	-0.13733
86.9688	-0.14038
87	-0.14648
87.0625	-0.15869
87.125	-0.15869
87.1562	-0.15869
87.2188	-0.14954
87.25	-0.14954
87.3125	-0.13123
87.375	-0.11902
87.4062	-0.10071
87.4688	-0.10986
87.5	-0.11292
87.5625	-0.11292
87.625	-0.11597
87.6562	-0.11597
87.7188	-0.10986
87.75	-0.10681
87.8125	-0.10071
87.875	-0.08545
87.9062	-0.07935
87.9688	-0.08545
88	-0.08545
88.0625	-0.07019
88.125	-0.05798
88.1562	-0.04578
88.2188	-0.05188
88.25	-0.04883
88.3125	-0.04272
88.375	-0.03662
88.4062	-0.03967
88.4688	-0.02747
88.5	-0.01526
88.5625	-0.00305
88.625	0
88.6562	0
88.7188	-0.00305
88.75	0.0061
88.8125	0.00305
88.875	0.01221
88.9062	0.01221
88.9688	0.01526
89	0.00916
89.0625	0
89.125	-0.01831
89.1562	-0.02136
89.2188	-0.01221
89.25	0
89.3125	0.00916
89.375	0.00916
89.4062	0.01221
89.4688	0.01526
89.5	0.01526
89.5625	0.02136
89.625	0.03052
89.6562	0.03052
89.7188	0.02136
89.75	0.01526
89.8125	0.01221
89.875	0.01831
89.9062	0.01221
89.9688	0.01526
90	0.01221
90.0625	0.02747
90.125	0.03357
90.1562	0.04272
90.2188	0.03967
90.25	0.04272
90.3125	0.03662
90.375	0.03052
90.4062	0.00916
90.4688	0.00305
90.5	0
90.5625	-0.00305
90.625	-0.01526
90.6562	-0.02136
90.7188	-0.02441
90.75	-0.01221
90.8125	-0.0061
90.875	0.0061
90.9062	0.0061
90.9688	0.00305
91	-0.00916
91.0625	-0.01831
91.125	-0.01526
91.1562	-0.01526
91.2188	-0.01526
91.25	-0.01526
91.3125	-0.00916
91.375	-0.00916
91.4062	-0.00916
91.4688	-0.02441
91.5	-0.03052
91.5625	-0.04578
91.625	-0.03662
91.6562	-0.03357
91.7188	-0.01831
91.75	-0.01831
91.8125	-0.02441
91.875	-0.04578
91.9062	-0.05188
91.9688	-0.04883
92	-0.04272
92.0625	-0.04272
92.125	-0.04272
92.1562	-0.04578
92.2188	-0.04578
92.25	-0.04272
92.3125	-0.04272
92.375	-0.03662
92.4062	-0.03052
92.4688	-0.02136
92.5	-0.02747
92.5625	-0.02136
92.625	-0.02747
92.6562	-0.02747
92.7188	-0.03662
92.75	-0.04883
92.8125	-0.06409
92.875	-0.06714
92.9062	-0.05798
92.9688	-0.05798
93	-0.05493
93.0625	-0.05188
93.125	-0.05188
93.1562	-0.04883
93.2188	-0.04272
93.25	-0.03662
93.3125	-0.03967
93.375	-0.04272
93.4062	-0.04272
93.4688	-0.04272
93.5	-0.04883
93.5625	-0.05798
93.625	-0.06104
93.6562	-0.05798
93.7188	-0.05798
93.75	-0.06104
93.8125	-0.06714
93.875	-0.05798
93.9062	-0.04883
93.9688	-0.04883
94	-0.04272
94.0625	-0.05188
94.125	-0.05188
94.1562	-0.05188
94.2188	-0.04272
94.25	-0.02747
94.3125	-0.02441
94.375	-0.02441
94.4062	-0.03357
94.4688	-0.03662
94.5	-0.03967
94.5625	-0.04272
94.625	-0.04272
94.6562	-0.03052
94.7188	-0.03052
94.75	-0.02747
94.8125	-0.03357
94.875	-0.03662
94.9062	-0.04272
94.9688	-0.03967
95	-0.03357
95.0625	-0.03052
95.125	-0.00916
95.1562	0.0061
95.2188	0.00916
95.25	0.0061
95.3125	0.0061
95.375	-0.0061
95.4062	-0.02136
95.4688	-0.01831
95.5	-0.00916
95.5625	-0.00305
95.625	0.00305
95.6562	-0.00305
95.7188	0.0061
95.75	0.00305
95.8125	0.01221
95.875	0.01831
95.9062	0.02441
95.9688	0.03662
96	0.03662
96.0625	0.03052
96.125	0.02441
96.1562	0.02441
96.2188	0.02441
96.25	0.02136
96.3125	0.02747
96.375	0.03357
96.4062	0.05188
96.4688	0.05798
96.5	0.05798
96.5625	0.05798
96.625	0.05188
96.6562	0.05188
96.7188	0.04578
96.75	0.04272
96.8125	0.04578
96.875	0.06409
96.9062	0.07019
96.9688	0.07019
97	0.05188
97.0625	0.03357
97.125	0.03357
97.1562	0.02441
97.2188	0.02747
97.25	0.03052
97.3125	0.02441
97.375	0.01221
97.4062	0.00305
97.4688	-0.0061
97.5	-0.01831
97.5625	-0.01526
97.625	-0.0061
97.6562	-0.00305
97.7188	-0.01526
97.75	-0.02441
97.8125	-0.03357
97.875	-0.04272
97.9062	-0.05188
97.9688	-0.06104
98	-0.06409
98.0625	-0.06714
98.125	-0.05493
98.1562	-0.05188
98.2188	-0.04883
98.25	-0.06104
98.3125	-0.07019
98.375	-0.0824
98.4062	-0.08545
98.4688	-0.0824
98.5	-0.0885
98.5625	-0.0885
98.625	-0.0885
98.6562	-0.08545
98.7188	-0.08545
98.75	-0.0885
98.8125	-0.0946
98.875	-0.10071
98.9062	-0.10071
98.9688	-0.10681
99	-0.10986
99.0625	-0.12817
99.125	-0.13123
99.1562	-0.14038
99.2188	-0.13428
99.25	-0.12817
99.3125	-0.11902
99.375	-0.11597
99.4062	-0.11597
99.4688	-0.11902
99.5	-0.13123
99.5625	-0.14343
99.625	-0.14954
99.6562	-0.14648
99.7188	-0.14343
99.75	-0.13733
99.8125	-0.13428
99.875	-0.12817
[truncated: 98,003 more rows]

## Sheet: Figure 3Ii down
Con	NALCN-KD
0.85	0
1.2	0
1.68	0
2.22	0
1.06	0.05
2.16	0.21
2	0.2
3.97	0
0.8	0.1
1.2	0.24
0.83	0.2
0.78	0
2.17	0
1.3	0
0.82	0
0.8	0.02
1.2	0
0.83	0
0.78	0.4
3.03	0
0.55	0.39
1.75	0.07
1.45	0.01
2.98	0
2.8	0
1.05	0
1.59	0
1.99	0
2.68	0.01
1.58	0.25
	0.3
	0.33
	0
	0
	0

## Sheet: Figure 3Iii
nalcn-kd
Time(ms)	RMP(mV)
0	-0.03052
0.04688	-0.03662
0.10156	-0.03815
0.14844	-0.03815
0.19531	-0.0351
0.25	-0.0351
0.29688	-0.03204
0.35156	-0.03204
0.39844	-0.02747
0.44531	-0.02441
0.5	-0.01984
0.54688	-0.01526
0.60156	-0.01221
0.64844	-0.01526
0.69531	-0.01831
0.75	-0.02136
0.79688	-0.02289
0.85156	-0.03052
0.89844	-0.03662
0.94531	-0.0351
1	-0.02747
1.04688	-0.02441
1.10156	-0.02747
1.14844	-0.03357
1.19531	-0.03052
1.25	-0.01831
1.29688	-0.01068
1.35156	-0.00763
1.39844	-0.00916
1.44531	0
1.5	0.01221
1.54688	0.02899
1.60156	0.0412
1.64844	0.0473
1.69531	0.04883
1.75	0.04272
1.79688	0.02594
1.85156	0.01984
1.89844	0.00916
1.94531	-0.00305
2	-0.01831
2.04688	-0.02289
2.10156	-0.02747
2.14844	-0.02899
2.19531	-0.03662
2.25	-0.0351
2.29688	-0.03815
2.35156	-0.0412
2.39844	-0.04883
2.44531	-0.05493
2.5	-0.05646
2.54688	-0.05798
2.60156	-0.06714
2.64844	-0.07629
2.69531	-0.08698
2.75	-0.08698
2.79688	-0.0885
2.85156	-0.08698
2.89844	-0.08698
2.94531	-0.0885
3	-0.08392
3.04688	-0.07782
3.10156	-0.06104
3.14844	-0.04425
3.19531	-0.03357
3.25	-0.03204
3.29688	-0.03967
3.35156	-0.03967
3.39844	-0.03967
3.44531	-0.0351
3.5	-0.02441
3.54688	-0.01678
3.60156	-0.01373
3.64844	-0.02289
3.69531	-0.02899
3.75	-0.0351
3.79688	-0.03662
3.85156	-0.03357
3.89844	-0.02594
3.94531	-0.01831
4	-0.02594
4.04688	-0.03357
4.10156	-0.03815
4.14844	-0.0412
4.19531	-0.04272
4.25	-0.04425
4.29688	-0.04272
4.35156	-0.04272
4.39844	-0.0412
4.44531	-0.0412
4.5	-0.03815
4.54688	-0.03357
4.60156	-0.03052
4.64844	-0.03204
4.69531	-0.03815
4.75	-0.04578
4.79688	-0.0473
4.85156	-0.04883
4.89844	-0.04883
4.94531	-0.04425
5	-0.03815
5.04688	-0.02899
5.10156	-0.03204
5.14844	-0.03052
5.19531	-0.02594
5.25	-0.01373
5.29688	-0.0061
5.35156	-0.00153
5.39844	0.00305
5.44531	0.00305
5.5	0.01068
5.54688	0.01831
5.60156	0.01984
5.64844	0.02594
5.69531	0.03357
5.75	0.0351
5.79688	0.0351
5.85156	0.03357
5.89844	0.03204
5.94531	0.02899
6	0.02289
6.04688	0.01526
6.10156	0.01068
6.14844	0.00916
6.19531	0.00916
6.25	0.0061
6.29688	0.0061
6.35156	0.01068
6.39844	0.01678
6.44531	0.01373
6.5	0.01526
6.54688	0.01373
6.60156	0.02136
6.64844	0.02441
6.69531	0.03204
6.75	0.03662
6.79688	0.0412
6.85156	0.05035
6.89844	0.05035
6.94531	0.0473
7	0.03967
7.04688	0.03967
7.10156	0.03967
7.14844	0.04425
7.19531	0.04883
7.25	0.05493
7.29688	0.06256
7.35156	0.05798
7.39844	0.05035
7.44531	0.0412
7.5	0.03967
7.54688	0.03357
7.60156	0.03357
7.64844	0.02594
7.69531	0.01678
7.75	0.0061
7.79688	-0.01373
7.85156	-0.03052
7.89844	-0.03662
7.94531	-0.02594
8	-0.01221
8.04688	-0.0061
8.10156	-0.01221
8.14844	-0.02136
8.19531	-0.02594
8.25	-0.02289
8.29688	-0.02289
8.35156	-0.02899
8.39844	-0.0351
8.44531	-0.0473
8.5	-0.05493
8.54688	-0.06409
8.60156	-0.07172
8.64844	-0.08545
8.69531	-0.09613
8.75	-0.10529
8.79688	-0.10681
8.85156	-0.10071
8.89844	-0.09918
8.94531	-0.10071
9	-0.10376
9.04688	-0.09918
9.10156	-0.09613
9.14844	-0.0885
9.19531	-0.0885
9.25	-0.09003
9.29688	-0.08698
9.35156	-0.09003
9.39844	-0.08545
9.44531	-0.09003
9.5	-0.0885
9.54688	-0.09003
9.60156	-0.09613
9.64844	-0.10223
9.69531	-0.10529
9.75	-0.10834
9.79688	-0.11444
9.85156	-0.11902
9.89844	-0.1236
9.94531	-0.12054
10	-0.11292
10.0469	-0.10376
10.1016	-0.09308
10.1484	-0.08392
10.1953	-0.07324
10.25	-0.07172
10.2969	-0.06714
10.3516	-0.06714
10.3984	-0.05951
10.4453	-0.06104
10.5	-0.06104
10.5469	-0.06256
10.6016	-0.06714
10.6484	-0.06256
10.6953	-0.06866
10.75	-0.07324
10.7969	-0.07935
10.8516	-0.07477
10.8984	-0.07172
10.9453	-0.06866
11	-0.07324
11.0469	-0.0824
11.1016	-0.08698
11.1484	-0.09155
11.1953	-0.0885
11.25	-0.0885
11.2969	-0.09308
11.3516	-0.10376
11.3984	-0.11902
11.4453	-0.13733
11.5	-0.15564
11.5469	-0.17395
11.6016	-0.18768
11.6484	-0.18768
11.6953	-0.18005
11.75	-0.17242
11.7969	-0.16174
11.8516	-0.14954
11.8984	-0.13428
11.9453	-0.11902
12	-0.10986
12.0469	-0.10071
12.1016	-0.09155
12.1484	-0.07782
12.1953	-0.05951
12.25	-0.05341
12.2969	-0.04425
12.3516	-0.03815
12.3984	-0.03052
12.4453	-0.03204
12.5	-0.03357
12.5469	-0.03815
12.6016	-0.0412
12.6484	-0.04578
12.6953	-0.05188
12.75	-0.05798
12.7969	-0.06104
12.8516	-0.05951
12.8984	-0.05951
12.9453	-0.05798
13	-0.06409
13.0469	-0.06866
13.1016	-0.07324
13.1484	-0.07935
13.1953	-0.07782
13.25	-0.07324
13.2969	-0.06714
13.3516	-0.06104
13.3984	-0.05798
13.4453	-0.05646
13.5	-0.05798
13.5469	-0.06256
13.6016	-0.06409
13.6484	-0.07172
13.6953	-0.07477
13.75	-0.07629
13.7969	-0.07477
13.8516	-0.07935
13.8984	-0.0824
13.9453	-0.08087
14	-0.07172
14.0469	-0.06714
14.1016	-0.06409
14.1484	-0.06561
14.1953	-0.07172
14.25	-0.07172
14.2969	-0.07172
14.3516	-0.07019
14.3984	-0.07324
14.4453	-0.07019
14.5	-0.07629
14.5469	-0.07477
14.6016	-0.07782
14.6484	-0.07324
14.6953	-0.07477
14.75	-0.07324
14.7969	-0.07782
14.8516	-0.08392
14.8984	-0.08392
14.9453	-0.08392
15	-0.07935
15.0469	-0.07935
15.1016	-0.07782
15.1484	-0.07629
15.1953	-0.07477
15.25	-0.0824
15.2969	-0.09003
15.3516	-0.09613
15.3984	-0.10376
15.4453	-0.10834
15.5	-0.10986
15.5469	-0.11292
15.6016	-0.11444
15.6484	-0.11902
15.6953	-0.12665
15.75	-0.12817
15.7969	-0.12817
15.8516	-0.13275
15.8984	-0.13885
15.9453	-0.14191
16	-0.13885
16.0469	-0.13733
16.1016	-0.1358
16.1484	-0.13123
16.1953	-0.12512
16.25	-0.11597
16.2969	-0.11444
16.3516	-0.11444
16.3984	-0.11139
16.4453	-0.10376
16.5	-0.10071
16.5469	-0.10071
16.6016	-0.10681
16.6484	-0.11139
16.6953	-0.11902
16.75	-0.1297
16.7969	-0.13428
16.8516	-0.1358
16.8984	-0.13275
16.9453	-0.12665
17	-0.1236
17.0469	-0.12054
17.1016	-0.11902
17.1484	-0.11597
17.1953	-0.11597
17.25	-0.11902
17.2969	-0.12207
17.3516	-0.12512
17.3984	-0.1236
17.4453	-0.12512
17.5	-0.12207
17.5469	-0.11902
17.6016	-0.11139
17.6484	-0.10681
17.6953	-0.09308
17.75	-0.07477
17.7969	-0.05798
17.8516	-0.05951
17.8984	-0.07172
17.9453	-0.0946
18	-0.10834
18.0469	-0.11597
18.1016	-0.11597
18.1484	-0.11749
18.1953	-0.11444
18.25	-0.11444
18.2969	-0.11292
18.3516	-0.10834
18.3984	-0.10529
18.4453	-0.10223
18.5	-0.09155
18.5469	-0.0885
18.6016	-0.08545
18.6484	-0.08698
18.6953	-0.07172
18.75	-0.06256
18.7969	-0.04883
18.8516	-0.03967
18.8984	-0.02747
18.9453	-0.02441
19	-0.02594
19.0469	-0.02899
19.1016	-0.02594
19.1484	-0.02594
19.1953	-0.02747
19.25	-0.03357
19.2969	-0.04272
19.3516	-0.05646
19.3984	-0.06409
19.4453	-0.06714
19.5	-0.06256
19.5469	-0.06104
19.6016	-0.05341
19.6484	-0.0473
19.6953	-0.04578
19.75	-0.03967
19.7969	-0.03357
19.8516	-0.02289
19.8984	-0.01678
19.9453	-0.01678
20	-0.01678
20.0469	-0.01984
20.1016	-0.01526
20.1484	-0.00916
20.1953	0
20.25	0.00305
20.2969	-0.00153
20.3516	-0.01068
20.3984	-0.01984
20.4453	-0.02594
20.5	-0.02289
20.5469	-0.02594
20.6016	-0.02747
20.6484	-0.03052
20.6953	-0.02747
20.75	-0.02594
20.7969	-0.02136
20.8516	-0.02136
20.8984	-0.01526
20.9453	-0.01678
21	-0.01526
21.0469	-0.01221
21.1016	-0.00763
21.1484	-0.00153
21.1953	0.00305
21.25	0
21.2969	-0.0061
21.3516	-0.01221
21.3984	-0.01221
21.4453	-0.01068
21.5	0
21.5469	0.01373
21.6016	0.02747
21.6484	0.03662
21.6953	0.0351
21.75	0.02441
21.7969	0.00763
21.8516	-0.00305
21.8984	-0.0061
21.9453	0.00153
22	0.00763
22.0469	0.00916
22.1016	-0.00305
22.1484	-0.00916
22.1953	-0.01831
22.25	-0.01984
22.2969	-0.02441
22.3516	-0.03052
22.3984	-0.04272
22.4453	-0.05035
22.5	-0.05035
22.5469	-0.04883
22.6016	-0.0473
22.6484	-0.04425
22.6953	-0.03815
22.75	-0.03204
22.7969	-0.02899
22.8516	-0.03052
22.8984	-0.03052
22.9453	-0.02594
23	-0.03052
23.0469	-0.03815
23.1016	-0.03967
23.1484	-0.0351
23.1953	-0.03204
23.25	-0.03052
23.2969	-0.03052
23.3516	-0.0351
23.3984	-0.03357
23.4453	-0.03662
23.5	-0.04272
23.5469	-0.04425
23.6016	-0.03967
23.6484	-0.0412
23.6953	-0.04578
23.75	-0.04883
23.7969	-0.05188
23.8516	-0.04578
23.8984	-0.04425
23.9453	-0.0351
24	-0.03052
24.0469	-0.02899
24.1016	-0.0351
24.1484	-0.04272
24.1953	-0.04272
24.25	-0.04578
24.2969	-0.04272
24.3516	-0.0412
24.3984	-0.0412
24.4453	-0.03967
24.5	-0.03204
24.5469	-0.02899
24.6016	-0.02594
24.6484	-0.02441
24.6953	-0.01526
24.75	-0.01068
24.7969	-0.00458
24.8516	-0.0061
24.8984	-0.01373
24.9453	-0.01526
25	-0.01984
25.0469	-0.01984
25.1016	-0.02441
25.1484	-0.01984
25.1953	-0.01068
25.25	-0.00763
25.2969	-0.00305
25.3516	-0.0061
25.3984	-0.00305
25.4453	-0.00916
25.5	-0.01526
25.5469	-0.02289
25.6016	-0.02289
25.6484	-0.01831
25.6953	-0.01373
25.75	-0.01068
25.7969	-0.0061
25.8516	0
25.8984	0.00305
25.9453	-0.00153
26	-0.00763
26.0469	-0.01373
26.1016	-0.01678
26.1484	-0.01831
26.1953	-0.01373
26.25	-0.0061
26.2969	0.00153
26.3516	0.00916
26.3984	0.00916
26.4453	0.01068
26.5	0.01221
26.5469	0.01221
26.6016	0.01526
26.6484	0.01526
26.6953	0.01831
26.75	0.02594
26.7969	0.03052
26.8516	0.03204
26.8984	0.03357
26.9453	0.0351
27	0.03815
27.0469	0.03967
27.1016	0.04272
27.1484	0.04883
27.1953	0.04883
27.25	0.04883
27.2969	0.04578
27.3516	0.0412
27.3984	0.0351
27.4453	0.03204
27.5	0.02899
27.5469	0.02441
27.6016	0.02441
27.6484	0.01526
27.6953	0.0061
27.75	-0.00458
27.7969	-0.01678
27.8516	-0.02899
27.8984	-0.03815
27.9453	-0.03815
28	-0.03357
28.0469	-0.03052
28.1016	-0.03052
28.1484	-0.03052
28.1953	-0.03052
28.25	-0.02594
28.2969	-0.02441
28.3516	-0.02136
28.3984	-0.02136
28.4453	-0.02136
28.5	-0.03204
28.5469	-0.0412
28.6016	-0.04883
28.6484	-0.05646
28.6953	-0.06104
28.75	-0.06714
28.7969	-0.06409
28.8516	-0.05951
28.8984	-0.05188
28.9453	-0.04883
29	-0.04425
29.0469	-0.04425
29.1016	-0.04425
29.1484	-0.04272
29.1953	-0.04578
29.25	-0.04883
29.2969	-0.05493
29.3516	-0.06256
29.3984	-0.06714
29.4453	-0.07172
29.5	-0.07477
29.5469	-0.07935
29.6016	-0.0824
29.6484	-0.08545
29.6953	-0.08698
29.75	-0.09155
29.7969	-0.09003
29.8516	-0.08698
29.8984	-0.08545
29.9453	-0.08698
30	-0.09155
30.0469	-0.0946
30.1016	-0.09308
30.1484	-0.09003
30.1953	-0.08698
30.25	-0.08698
30.2969	-0.09003
30.3516	-0.0885
30.3984	-0.09766
30.4453	-0.10529
30.5	-0.11139
30.5469	-0.11292
30.6016	-0.11444
30.6484	-0.12054
30.6953	-0.1236
30.75	-0.12512
30.7969	-0.1236
30.8516	-0.11902
30.8984	-0.11597
30.9453	-0.11139
31	-0.10681
31.0469	-0.10681
31.1016	-0.10834
31.1484	-0.10681
31.1953	-0.11292
31.25	-0.11292
31.2969	-0.12207
31.3516	-0.12817
31.3984	-0.13885
31.4453	-0.14496
31.5	-0.15259
31.5469	-0.1709
31.6016	-0.18768
31.6484	-0.19684
31.6953	-0.19379
31.75	-0.18921
31.7969	-0.17395
31.8516	-0.16022
31.8984	-0.13733
31.9453	-0.12665
32	-0.11749
32.0469	-0.11597
32.1016	-0.11139
32.1484	-0.10681
32.1953	-0.10071
32.25	-0.09003
32.2969	-0.08087
32.3516	-0.06714
32.3984	-0.06409
32.4453	-0.06409
32.5	-0.06714
32.5469	-0.06256
32.6016	-0.05951
32.6484	-0.05798
32.6953	-0.05951
32.75	-0.06409
32.7969	-0.06409
32.8516	-0.06866
32.8984	-0.06714
32.9453	-0.08087
33	-0.0885
33.0469	-0.09308
33.1016	-0.0885
33.1484	-0.08087
33.1953	-0.07172
33.25	-0.06714
33.2969	-0.06561
33.3516	-0.06256
33.3984	-0.05493
33.4453	-0.05188
33.5	-0.04425
33.5469	-0.04425
33.6016	-0.04425
33.6484	-0.0473
33.6953	-0.0473
33.75	-0.05035
33.7969	-0.05493
33.8516	-0.06104
33.8984	-0.06714
33.9453	-0.07172
34	-0.07782
34.0469	-0.0824
34.1016	-0.09003
34.1484	-0.09155
34.1953	-0.09918
34.25	-0.10223
34.2969	-0.10071
34.3516	-0.10071
34.3984	-0.10223
34.4453	-0.10223
34.5	-0.10681
34.5469	-0.10834
34.6016	-0.10071
34.6484	-0.09766
34.6953	-0.09155
34.75	-0.0885
34.7969	-0.0824
34.8516	-0.07782
34.8984	-0.07629
34.9453	-0.07324
35	-0.06256
35.0469	-0.05798
35.1016	-0.05493
35.1484	-0.05341
35.1953	-0.05035
35.25	-0.05035
35.2969	-0.05646
35.3516	-0.07172
35.3984	-0.08392
35.4453	-0.0946
35.5	-0.10071
35.5469	-0.09918
35.6016	-0.10071
35.6484	-0.10376
35.6953	-0.10529
35.75	-0.10834
35.7969	-0.11292
35.8516	-0.11444
35.8984	-0.11749
35.9453	-0.12054
36	-0.13275
36.0469	-0.13733
36.1016	-0.14038
36.1484	-0.13275
36.1953	-0.12512
36.25	-0.11597
36.2969	-0.11597
36.3516	-0.11597
36.3984	-0.10986
36.4453	-0.09308
36.5	-0.08545
36.5469	-0.08392
36.6016	-0.0946
36.6484	-0.10986
36.6953	-0.11902
36.75	-0.12054
36.7969	-0.11749
36.8516	-0.11139
36.8984	-0.11597
36.9453	-0.12512
37	-0.1297
37.0469	-0.13123
37.1016	-0.13733
37.1484	-0.14496
37.1953	-0.14496
37.25	-0.14496
37.2969	-0.13885
37.3516	-0.13428
37.3984	-0.13428
37.4453	-0.14343
37.5	-0.14496
37.5469	-0.14343
37.6016	-0.13428
37.6484	-0.12512
37.6953	-0.11139
37.75	-0.09918
37.7969	-0.08545
37.8516	-0.07935
37.8984	-0.07629
37.9453	-0.08087
38	-0.0885
38.0469	-0.09155
38.1016	-0.09003
38.1484	-0.08545
38.1953	-0.08087
38.25	-0.08545
38.2969	-0.08087
38.3516	-0.07324
38.3984	-0.06409
38.4453	-0.06104
38.5	-0.05646
38.5469	-0.04883
38.6016	-0.03662
38.6484	-0.02594
38.6953	-0.01831
38.75	-0.01678
38.7969	-0.02136
38.8516	-0.02289
38.8984	-0.01831
38.9453	-0.01831
39	-0.01373
39.0469	-0.01221
39.1016	-0.01373
39.1484	-0.01526
39.1953	-0.01373
39.25	-0.00763
39.2969	0.00153
39.3516	-0.00305
39.3984	-0.00763
39.4453	-0.01526
39.5	-0.01678
39.5469	-0.01678
39.6016	-0.01373
39.6484	-0.00916
39.6953	-0.00153
39.75	0.00305
39.7969	0.00153
39.8516	-0.00458
39.8984	-0.00763
39.9453	-0.01068
40	-0.01831
40.0469	-0.02289
40.1016	-0.03052
40.1484	-0.03204
40.1953	-0.02747
40.25	-0.03357
40.2969	-0.03357
40.3516	-0.03967
40.3984	-0.03967
40.4453	-0.0351
40.5	-0.03357
40.5469	-0.03052
40.6016	-0.02594
40.6484	-0.02289
40.6953	-0.02136
40.75	-0.02136
40.7969	-0.01984
40.8516	-0.01831
40.8984	-0.01526
40.9453	-0.0061
41	0.00305
41.0469	0.01068
41.1016	0.01068
41.1484	0.00458
41.1953	-0.00305
41.25	-0.0061
41.2969	-0.00763
41.3516	-0.00305
41.3984	-0.00458
41.4453	0.00305
41.5	0.01831
41.5469	0.03357
41.6016	0.03967
41.6484	0.04425
41.6953	0.04578
41.75	0.0473
41.7969	0.03967
41.8516	0.02899
41.8984	0.01678
41.9453	0.0061
42	0.00305
42.0469	-0.00153
42.1016	-0.00458
42.1484	-0.01221
42.1953	-0.01526
42.25	-0.01526
42.2969	-0.01831
42.3516	-0.02594
42.3984	-0.0351
42.4453	-0.05188
42.5	-0.06714
42.5469	-0.07477
42.6016	-0.07477
42.6484	-0.07324
42.6953	-0.07324
42.75	-0.06866
42.7969	-0.06866
42.8516	-0.06256
42.8984	-0.06104
42.9453	-0.06104
43	-0.07019
43.0469	-0.07629
43.1016	-0.07477
43.1484	-0.07172
43.1953	-0.07324
43.25	-0.07629
43.2969	-0.07629
43.3516	-0.07935
43.3984	-0.07782
43.4453	-0.0885
43.5	-0.09918
43.5469	-0.10223
43.6016	-0.10681
43.6484	-0.10376
43.6953	-0.09613
43.75	-0.0885
43.7969	-0.09003
43.8516	-0.09155
43.8984	-0.09003
43.9453	-0.09155
44	-0.08545
44.0469	-0.08392
44.1016	-0.08087
44.1484	-0.07477
44.1953	-0.06409
44.25	-0.05341
44.2969	-0.05035
44.3516	-0.05188
44.3984	-0.05341
44.4453	-0.05493
44.5	-0.0473
44.5469	-0.0412
44.6016	-0.03052
44.6484	-0.02594
44.6953	-0.0351
44.75	-0.03967
44.7969	-0.04272
44.8516	-0.03815
44.8984	-0.03052
44.9453	-0.02899
45	-0.02594
45.0469	-0.02747
45.1016	-0.02899
45.1484	-0.02594
45.1953	-0.02289
45.25	-0.02441
45.2969	-0.02594
45.3516	-0.02136
45.3984	-0.01984
45.4453	-0.01221
45.5	0.00153
45.5469	0.01373
45.6016	0.01831
45.6484	0.02289
45.6953	0.02594
45.75	0.03357
45.7969	0.03967
45.8516	0.03662
45.8984	0.02899
45.9453	0.02441
46	0.02289
46.0469	0.01526
46.1016	0.0061
46.1484	0.00153
46.1953	0.00458
46.25	0.0061
46.2969	0.01373
46.3516	0.01068
46.3984	0.01221
46.4453	0.01373
46.5	0.01984
46.5469	0.03204
46.6016	0.04272
46.6484	0.0473
46.6953	0.0473
46.75	0.05035
46.7969	0.05188
46.8516	0.0473
46.8984	0.04578
46.9453	0.03967
47	0.0351
47.0469	0.03357
47.1016	0.0412
47.1484	0.0473
47.1953	0.04425
47.25	0.0412
47.2969	0.0412
47.3516	0.04578
47.3984	0.04272
47.4453	0.0412
47.5	0.02747
47.5469	0.01526
47.6016	0
47.6484	-0.01221
47.6953	-0.02441
47.75	-0.03204
47.7969	-0.03815
47.8516	-0.04883
47.8984	-0.0473
47.9453	-0.04272
48	-0.03052
48.0469	-0.02289
48.1016	-0.02136
48.1484	-0.02747
48.1953	-0.03052
48.25	-0.02747
48.2969	-0.03052
48.3516	-0.03204
48.3984	-0.03815
48.4453	-0.0473
48.5	-0.05646
48.5469	-0.06104
48.6016	-0.06409
48.6484	-0.06104
48.6953	-0.06104
48.75	-0.06866
48.7969	-0.07935
48.8516	-0.09003
48.8984	-0.09003
48.9453	-0.0885
49	-0.0885
49.0469	-0.09003
49.1016	-0.08545
49.1484	-0.07324
49.1953	-0.06866
49.25	-0.07172
49.2969	-0.0824
49.3516	-0.08545
49.3984	-0.08698
49.4453	-0.0885
49.5	-0.08698
49.5469	-0.09155
49.6016	-0.09155
49.6484	-0.09766
49.6953	-0.10071
49.75	-0.10529
49.7969	-0.10223
49.8516	-0.10071
49.8984	-0.0946
49.9453	-0.09308
50	-0.08545
50.0469	-0.07324
50.1016	-0.06256
50.1484	-0.05493
50.1953	-0.05188
50.25	-0.05035
50.2969	-0.05493
50.3516	-0.05951
50.3984	-0.06561
50.4453	-0.06561
50.5	-0.06561
50.5469	-0.07019
50.6016	-0.07782
50.6484	-0.0824
50.6953	-0.08545
50.75	-0.09003
50.7969	-0.0885
50.8516	-0.09155
50.8984	-0.09003
50.9453	-0.08392
51	-0.08545
51.0469	-0.07935
51.1016	-0.07629
51.1484	-0.07324
51.1953	-0.07324
51.25	-0.07324
51.2969	-0.07782
51.3516	-0.0824
51.3984	-0.09155
51.4453	-0.10529
51.5	-0.11749
51.5469	-0.12207
51.6016	-0.11902
51.6484	-0.12207
51.6953	-0.12054
51.75	-0.12054
51.7969	-0.11292
51.8516	-0.10681
51.8984	-0.10834
51.9453	-0.11292
52	-0.12207
52.0469	-0.12207
52.1016	-0.12054
52.1484	-0.11597
52.1953	-0.11444
52.25	-0.10986
52.2969	-0.10529
52.3516	-0.09613
52.3984	-0.09308
52.4453	-0.0885
52.5	-0.09155
52.5469	-0.0946
52.6016	-0.09155
52.6484	-0.0946
52.6953	-0.10376
52.75	-0.11292
52.7969	-0.11597
52.8516	-0.11597
52.8984	-0.11139
52.9453	-0.10986
53	-0.10529
53.0469	-0.09766
53.1016	-0.0824
53.1484	-0.06561
53.1953	-0.05035
53.25	-0.03967
53.2969	-0.0351
53.3516	-0.0351
53.3984	-0.0351
53.4453	-0.02899
53.5	-0.02289
53.5469	-0.01373
53.6016	-0.00916
53.6484	-0.00763
53.6953	-0.01221
53.75	-0.01221
53.7969	-0.01678
53.8516	-0.01831
53.8984	-0.02747
53.9453	-0.03815
54	-0.0473
54.0469	-0.05035
54.1016	-0.05035
54.1484	-0.05341
54.1953	-0.05341
54.25	-0.05493
54.2969	-0.05951
54.3516	-0.06714
54.3984	-0.06866
54.4453	-0.07019
54.5	-0.06104
54.5469	-0.06104
54.6016	-0.06714
54.6484	-0.07629
54.6953	-0.08087
54.75	-0.08545
54.7969	-0.0946
54.8516	-0.10223
54.8984	-0.10681
54.9453	-0.10529
55	-0.10529
55.0469	-0.11139
55.1016	-0.11902
55.1484	-0.12207
55.1953	-0.11749
55.25	-0.11139
55.2969	-0.11139
55.3516	-0.10986
55.3984	-0.10986
55.4453	-0.11139
55.5	-0.11139
55.5469	-0.11292
55.6016	-0.11292
55.6484	-0.11597
55.6953	-0.12665
55.75	-0.13428
55.7969	-0.13885
55.8516	-0.14038
55.8984	-0.14343
55.9453	-0.14343
56	-0.13885
56.0469	-0.12665
56.1016	-0.11139
56.1484	-0.10834
56.1953	-0.10681
56.25	-0.10681
56.2969	-0.10223
56.3516	-0.10376
56.3984	-0.10681
56.4453	-0.10986
56.5	-0.10376
56.5469	-0.09918
56.6016	-0.09613
56.6484	-0.10376
56.6953	-0.10834
56.75	-0.10986
56.7969	-0.10986
56.8516	-0.11597
56.8984	-0.11902
56.9453	-0.1236
57	-0.1236
57.0469	-0.13123
57.1016	-0.14038
57.1484	-0.14496
57.1953	-0.14191
57.25	-0.14801
57.2969	-0.15106
57.3516	-0.14954
57.3984	-0.14648
57.4453	-0.14648
57.5	-0.14496
57.5469	-0.14038
57.6016	-0.12817
57.6484	-0.10681
57.6953	-0.09308
57.75	-0.08087
57.7969	-0.07324
57.8516	-0.06866
57.8984	-0.07324
57.9453	-0.08087
58	-0.09308
58.0469	-0.09155
58.1016	-0.0885
58.1484	-0.0885
58.1953	-0.09155
58.25	-0.0946
58.2969	-0.09155
58.3516	-0.0824
58.3984	-0.07782
58.4453	-0.07019
58.5	-0.06866
58.5469	-0.06409
58.6016	-0.06409
58.6484	-0.05951
58.6953	-0.05646
58.75	-0.04272
58.7969	-0.03357
58.8516	-0.02594
58.8984	-0.02289
58.9453	-0.01831
59	-0.01221
59.0469	-0.01373
59.1016	-0.02136
59.1484	-0.02747
59.1953	-0.02747
59.25	-0.01984
59.2969	-0.01221
59.3516	-0.00305
59.3984	-0.00153
59.4453	-0.00153
59.5	-0.00458
59.5469	-0.00305
59.6016	-0.00153
59.6484	0.00305
59.6953	0.00458
59.75	0.00305
59.7969	-0.0061
59.8516	-0.00763
59.8984	-0.01221
59.9453	-0.00916
60	-0.00763
60.0469	-0.0061
60.1016	-0.00763
60.1484	-0.01221
60.1953	-0.02289
60.25	-0.02747
60.2969	-0.03967
60.3516	-0.04425
60.3984	-0.05035
60.4453	-0.05188
60.5	-0.04883
60.5469	-0.03967
60.6016	-0.03967
60.6484	-0.0351
60.6953	-0.0412
60.75	-0.03815
60.7969	-0.03662
60.8516	-0.03052
60.8984	-0.02747
60.9453	-0.02289
61	-0.01526
61.0469	-0.01373
61.1016	-0.01221
61.1484	-0.01221
61.1953	-0.00763
61.25	-0.01221
61.2969	-0.01526
61.3516	-0.02289
61.3984	-0.02747
61.4453	-0.0351
61.5	-0.03967
61.5469	-0.03204
61.6016	-0.01984
61.6484	-0.00916
61.6953	-0.00305
61.75	-0.00916
61.7969	-0.01678
61.8516	-0.02594
61.8984	-0.02899
61.9453	-0.02441
62	-0.01831
62.0469	-0.02136
62.1016	-0.02136
62.1484	-0.01373
62.1953	-0.00458
62.25	-0.00305
62.2969	-0.0061
62.3516	-0.01526
62.3984	-0.02441
62.4453	-0.02899
62.5	-0.03204
62.5469	-0.03662
62.6016	-0.0412
62.6484	-0.04883
62.6953	-0.04578
62.75	-0.04272
62.7969	-0.0351
62.8516	-0.03662
62.8984	-0.03815
62.9453	-0.03815
63	-0.03662
63.0469	-0.0351
63.1016	-0.03967
63.1484	-0.04425
63.1953	-0.04578
63.25	-0.04883
63.2969	-0.05188
63.3516	-0.05493
63.3984	-0.05188
63.4453	-0.05341
63.5	-0.05798
63.5469	-0.06409
63.6016	-0.06561
63.6484	-0.06256
63.6953	-0.05646
63.75	-0.04883
63.7969	-0.04578
63.8516	-0.04425
63.8984	-0.03967
63.9453	-0.03204
64	-0.02441
64.0469	-0.02747
64.1016	-0.02899
64.1484	-0.03204
64.1953	-0.03357
64.25	-0.0351
64.2969	-0.03357
64.3516	-0.02899
64.3984	-0.02899
64.4453	-0.0351
64.5	-0.0412
64.5469	-0.04272
64.6016	-0.03967
64.6484	-0.04578
64.6953	-0.04883
64.75	-0.05646
64.7969	-0.05493
64.8516	-0.05188
64.8984	-0.05493
64.9453	-0.05951
65	-0.06256
65.0469	-0.06104
65.1016	-0.06104
65.1484	-0.06256
65.1953	-0.06256
65.25	-0.06256
65.2969	-0.05951
65.3516	-0.05951
65.3984	-0.05951
65.4453	-0.05646
65.5	-0.05035
65.5469	-0.0473
65.6016	-0.04425
65.6484	-0.03815
65.6953	-0.02594
65.75	-0.01831
65.7969	-0.01221
65.8516	-0.01221
65.8984	-0.00763
65.9453	-0.00458
66	-0.00305
66.0469	-0.00153
66.1016	0
66.1484	0.00458
66.1953	0.00153
66.25	-0.0061
66.2969	-0.01526
66.3516	-0.01831
66.3984	-0.01678
66.4453	-0.01678
66.5	-0.01831
66.5469	-0.02441
66.6016	-0.02136
66.6484	-0.02289
66.6953	-0.02136
66.75	-0.02136
66.7969	-0.02136
66.8516	-0.01831
66.8984	-0.01831
66.9453	-0.01373
67	-0.00916
67.0469	-0.00305
67.1016	0.00153
67.1484	0.00763
67.1953	0.01373
67.25	0.01526
67.2969	0.01373
67.3516	0.01221
67.3984	0.01831
67.4453	0.02289
67.5	0.02136
67.5469	0.01221
67.6016	-0.00153
67.6484	-0.01068
67.6953	-0.01526
67.75	-0.02136
67.7969	-0.03052
67.8516	-0.03815
67.8984	-0.0412
67.9453	-0.03357
68	-0.02136
68.0469	-0.01526
68.1016	-0.01373
68.1484	-0.01831
68.1953	-0.02289
68.25	-0.02594
68.2969	-0.0351
68.3516	-0.04578
68.3984	-0.05646
68.4453	-0.06714
68.5	-0.07935
68.5469	-0.08087
68.6016	-0.08545
68.6484	-0.09308
68.6953	-0.10681
68.75	-0.11902
68.7969	-0.1297
68.8516	-0.13733
68.8984	-0.14191
68.9453	-0.14038
69	-0.14038
69.0469	-0.13885
69.1016	-0.13885
69.1484	-0.14038
69.1953	-0.1358
69.25	-0.1358
69.2969	-0.13733
69.3516	-0.14191
69.3984	-0.14801
69.4453	-0.14648
69.5	-0.14191
69.5469	-0.13733
69.6016	-0.13428
69.6484	-0.12817
69.6953	-0.12207
69.75	-0.11749
69.7969	-0.10681
69.8516	-0.09918
69.8984	-0.09155
69.9453	-0.0885
70	-0.08392
70.0469	-0.07935
70.1016	-0.07782
70.1484	-0.07172
70.1953	-0.05951
70.25	-0.05188
70.2969	-0.05493
70.3516	-0.05798
70.3984	-0.06561
70.4453	-0.07172
70.5	-0.07629
70.5469	-0.08087
70.6016	-0.08392
70.6484	-0.0885
70.6953	-0.09613
70.75	-0.09918
70.7969	-0.10376
70.8516	-0.09918
70.8984	-0.10376
70.9453	-0.10834
71	-0.11444
71.0469	-0.12207
71.1016	-0.12054
71.1484	-0.11597
71.1953	-0.11139
71.25	-0.10529
71.2969	-0.0946
71.3516	-0.09155
71.3984	-0.0946
71.4453	-0.10376
71.5	-0.10681
71.5469	-0.11597
71.6016	-0.12817
71.6484	-0.13885
71.6953	-0.14343
71.75	-0.13733
71.7969	-0.13428
71.8516	-0.1236
71.8984	-0.11292
71.9453	-0.09308
72	-0.07324
72.0469	-0.06714
72.1016	-0.07477
72.1484	-0.08087
72.1953	-0.08545
72.25	-0.08698
72.2969	-0.08545
72.3516	-0.08545
72.3984	-0.07477
72.4453	-0.06866
72.5	-0.06104
72.5469	-0.05493
72.6016	-0.05035
72.6484	-0.04578
72.6953	-0.0473
72.75	-0.05341
72.7969	-0.06561
72.8516	-0.07935
72.8984	-0.0885
72.9453	-0.09918
73	-0.10223
73.0469	-0.10376
73.1016	-0.09613
73.1484	-0.08392
73.1953	-0.07324
73.25	-0.06561
73.2969	-0.06104
73.3516	-0.05798
73.3984	-0.06104
73.4453	-0.06714
73.5	-0.06866
73.5469	-0.06256
73.6016	-0.06561
73.6484	-0.07172
73.6953	-0.0824
73.75	-0.08698
73.7969	-0.08698
73.8516	-0.08545
73.8984	-0.08392
73.9453	-0.07935
74	-0.08087
74.0469	-0.08698
74.1016	-0.09155
74.1484	-0.09613
74.1953	-0.09613
74.25	-0.09308
74.2969	-0.0885
74.3516	-0.08392
74.3984	-0.07935
74.4453	-0.07935
74.5	-0.08545
74.5469	-0.09613
74.6016	-0.10071
74.6484	-0.09918
74.6953	-0.08698
74.75	-0.0824
74.7969	-0.08698
74.8516	-0.09003
74.8984	-0.0885
74.9453	-0.08087
75	-0.07324
75.0469	-0.06866
75.1016	-0.06714
75.1484	-0.07019
75.1953	-0.07629
75.25	-0.08545
75.2969	-0.09155
75.3516	-0.09613
75.3984	-0.10376
75.4453	-0.10681
75.5	-0.10986
75.5469	-0.10071
75.6016	-0.09918
75.6484	-0.10071
75.6953	-0.10681
75.75	-0.11139
75.7969	-0.11444
75.8516	-0.11597
75.8984	-0.12054
75.9453	-0.12054
76	-0.12512
76.0469	-0.12054
76.1016	-0.10986
76.1484	-0.10071
76.1953	-0.09766
76.25	-0.09918
76.2969	-0.10071
76.3516	-0.10071
76.3984	-0.09613
76.4453	-0.0885
76.5	-0.0885
76.5469	-0.09918
76.6016	-0.10681
76.6484	-0.11139
76.6953	-0.11292
76.75	-0.11597
76.7969	-0.11902
76.8516	-0.12512
76.8984	-0.1236
76.9453	-0.12817
77	-0.13275
77.0469	-0.13885
77.1016	-0.13885
77.1484	-0.14191
77.1953	-0.14343
77.25	-0.14496
77.2969	-0.14343
77.3516	-0.14038
77.3984	-0.14191
77.4453	-0.14954
77.5	-0.14801
77.5469	-0.14038
77.6016	-0.1297
77.6484	-0.12207
77.6953	-0.11444
77.75	-0.11444
77.7969	-0.10986
77.8516	-0.10681
77.8984	-0.09918
77.9453	-0.10071
78	-0.11139
78.0469	-0.12512
78.1016	-0.1358
78.1484	-0.14191
78.1953	-0.14191
78.25	-0.14191
78.2969	-0.13123
78.3516	-0.12512
78.3984	-0.11444
78.4453	-0.10376
78.5	-0.08698
78.5469	-0.07324
78.6016	-0.06256
78.6484	-0.05493
78.6953	-0.04272
78.75	-0.0351
78.7969	-0.02441
78.8516	-0.01678
78.8984	-0.00458
78.9453	-0.00305
79	-0.00458
79.0469	-0.00763
79.1016	-0.00458
79.1484	-0.00153
79.1953	-0.00153
79.25	-0.00153
79.2969	0.00153
79.3516	0.00763
79.3984	0.01068
79.4453	0.00458
79.5	-0.00305
79.5469	-0.0061
79.6016	-0.00763
79.6484	-0.00916
79.6953	-0.01221
79.75	-0.00763
79.7969	0.0061
79.8516	0.01221
79.8984	0.01678
79.9453	0.01221
80	0.00305
80.0469	-0.00458
80.1016	-0.01068
80.1484	-0.01373
80.1953	-0.01831
80.25	-0.01678
80.2969	-0.02289
80.3516	-0.02441
80.3984	-0.03357
80.4453	-0.03357
80.5	-0.03815
80.5469	-0.03967
80.6016	-0.04272
80.6484	-0.03967
80.6953	-0.03052
80.75	-0.02441
80.7969	-0.02136
80.8516	-0.01678
80.8984	-0.01831
80.9453	-0.01526
81	-0.01221
81.0469	-0.01068
81.1016	0
81.1484	0.00763
81.1953	0.01373
81.25	0.01373
81.2969	0.01526
81.3516	0.01678
81.3984	0.01984
81.4453	0.01831
81.5	0.03052
81.5469	0.03662
81.6016	0.0473
81.6484	0.05035
81.6953	0.05493
81.75	0.05341
81.7969	0.04578
81.8516	0.03357
81.8984	0.02136
81.9453	0.01221
82	0.00305
82.0469	-0.00153
82.1016	-0.00763
82.1484	-0.01068
82.1953	-0.01221
82.25	-0.01221
82.2969	-0.01831
82.3516	-0.02899
82.3984	-0.0412
82.4453	-0.04425
82.5	-0.03967
82.5469	-0.03204
82.6016	-0.02899
82.6484	-0.03357
82.6953	-0.03357
82.75	-0.03204
82.7969	-0.03204
82.8516	-0.03357
82.8984	-0.0351
82.9453	-0.03357
83	-0.03357
83.0469	-0.0412
83.1016	-0.0473
83.1484	-0.04578
83.1953	-0.04272
83.25	-0.04272
83.2969	-0.04578
83.3516	-0.04578
83.3984	-0.04578
83.4453	-0.05188
83.5	-0.06256
83.5469	-0.07019
83.6016	-0.07019
83.6484	-0.06714
83.6953	-0.06256
83.75	-0.06409
83.7969	-0.06714
83.8516	-0.07477
83.8984	-0.07782
83.9453	-0.08392
84	-0.07935
84.0469	-0.07324
84.1016	-0.06714
84.1484	-0.06104
84.1953	-0.05188
84.25	-0.0412
84.2969	-0.03052
84.3516	-0.02594
84.3984	-0.02136
84.4453	-0.01526
84.5	-0.0061
84.5469	-0.00305
84.6016	-0.00153
84.6484	-0.00305
84.6953	-0.00305
84.75	0.00153
84.7969	-0.00153
84.8516	-0.00916
84.8984	-0.01526
84.9453	-0.01984
85	-0.01831
85.0469	-0.01678
85.1016	-0.01678
85.1484	-0.01068
85.1953	-0.01526
85.25	-0.02441
85.2969	-0.03815
85.3516	-0.05035
85.3984	-0.04578
85.4453	-0.04578
85.5	-0.04425
85.5469	-0.04883
85.6016	-0.05188
85.6484	-0.04883
85.6953	-0.04272
85.75	-0.03052
85.7969	-0.02289
85.8516	-0.01221
85.8984	-0.01068
85.9453	-0.00763
86	-0.01831
86.0469	-0.0351
86.1016	-0.05188
86.1484	-0.05798
86.1953	-0.05035
86.25	-0.03815
86.2969	-0.02747
86.3516	-0.02441
86.3984	-0.02747
86.4453	-0.02289
86.5	-0.01526
86.5469	-0.0061
86.6016	-0.0061
86.6484	-0.00458
86.6953	0.00305
86.75	0.00916
86.7969	0.01831
86.8516	0.02136
86.8984	0.02289
86.9453	0.02594
87	0.02289
87.0469	0.01984
87.1016	0.01678
87.1484	0.01678
87.1953	0.01221
87.25	0.00763
87.2969	0.00153
87.3516	0.00153
87.3984	0.00305
87.4453	0.0061
87.5	0.0061
87.5469	0.00153
87.6016	-0.00305
87.6484	-0.01678
87.6953	-0.03204
87.75	-0.04578
87.7969	-0.05798
87.8516	-0.06409
87.8984	-0.05951
87.9453	-0.04883
88	-0.04272
88.0469	-0.03815
88.1016	-0.04272
88.1484	-0.05188
88.1953	-0.05951
88.25	-0.05951
88.2969	-0.05798
88.3516	-0.05951
88.3984	-0.05951
88.4453	-0.06409
88.5	-0.06866
88.5469	-0.07172
88.6016	-0.06866
88.6484	-0.06561
88.6953	-0.06409
88.75	-0.06409
88.7969	-0.07019
88.8516	-0.07629
88.8984	-0.08545
88.9453	-0.0885
89	-0.09308
89.0469	-0.09308
89.1016	-0.0946
89.1484	-0.09155
89.1953	-0.08545
89.25	-0.07782
89.2969	-0.07629
89.3516	-0.07629
89.3984	-0.07782
89.4453	-0.07935
89.5	-0.08087
89.5469	-0.0885
89.6016	-0.09918
89.6484	-0.10681
89.6953	-0.10986
89.75	-0.11444
89.7969	-0.10986
89.8516	-0.10986
89.8984	-0.10681
89.9453	-0.10681
90	-0.10986
90.0469	-0.10834
90.1016	-0.10834
90.1484	-0.10376
90.1953	-0.09918
90.25	-0.09613
90.2969	-0.09003
90.3516	-0.08545
90.3984	-0.08087
90.4453	-0.07935
90.5	-0.07935
90.5469	-0.08087
90.6016	-0.08087
90.6484	-0.08392
90.6953	-0.08698
90.75	-0.09155
90.7969	-0.09918
90.8516	-0.10529
90.8984	-0.10986
90.9453	-0.10681
91	-0.10223
91.0469	-0.10529
91.1016	-0.10529
91.1484	-0.10223
91.1953	-0.09155
91.25	-0.0824
91.2969	-0.07935
91.3516	-0.08087
91.3984	-0.09003
91.4453	-0.09308
91.5	-0.09918
91.5469	-0.10834
91.6016	-0.11597
91.6484	-0.12817
91.6953	-0.13123
91.75	-0.1358
91.7969	-0.13123
91.8516	-0.12512
91.8984	-0.11597
91.9453	-0.11292
92	-0.11139
92.0469	-0.10834
92.1016	-0.09613
92.1484	-0.0885
92.1953	-0.08698
92.25	-0.08545
92.2969	-0.08392
92.3516	-0.07477
92.3984	-0.06561
92.4453	-0.06104
92.5	-0.05951
92.5469	-0.05341
92.6016	-0.05035
92.6484	-0.04272
92.6953	-0.03967
92.75	-0.04272
92.7969	-0.04578
92.8516	-0.05035
92.8984	-0.05646
92.9453	-0.06104
93	-0.05646
93.0469	-0.05798
93.1016	-0.05493
93.1484	-0.05188
93.1953	-0.04578
93.25	-0.0412
93.2969	-0.0473
93.3516	-0.05493
93.3984	-0.05951
93.4453	-0.06256
93.5	-0.05798
93.5469	-0.05798
93.6016	-0.06104
93.6484	-0.06714
93.6953	-0.07324
93.75	-0.07477
93.7969	-0.07477
93.8516	-0.07019
93.8984	-0.07324
93.9453	-0.08087
94	-0.09003
94.0469	-0.0946
94.1016	-0.08698
94.1484	-0.08087
94.1953	-0.08087
94.25	-0.08545
94.2969	-0.0885
94.3516	-0.08545
94.3984	-0.07935
94.4453	-0.07782
94.5	-0.07324
94.5469	-0.07782
94.6016	-0.08087
94.6484	-0.09003
94.6953	-0.09613
94.75	-0.10376
94.7969	-0.10223
94.8516	-0.10223
94.8984	-0.10223
94.9453	-0.10529
95	-0.10223
95.0469	-0.09918
95.1016	-0.09613
95.1484	-0.09766
95.1953	-0.09613
95.25	-0.09308
95.2969	-0.08545
95.3516	-0.07782
95.3984	-0.07477
95.4453	-0.07629
95.5	-0.07477
95.5469	-0.07172
95.6016	-0.07019
95.6484	-0.07172
95.6953	-0.07782
95.75	-0.08392
95.7969	-0.09613
95.8516	-0.10681
95.8984	-0.11139
95.9453	-0.11749
96	-0.1236
96.0469	-0.12665
96.1016	-0.12207
96.1484	-0.11292
96.1953	-0.11139
96.25	-0.10529
96.2969	-0.10681
96.3516	-0.10529
96.3984	-0.11292
96.4453	-0.11444
96.5	-0.11597
96.5469	-0.11597
96.6016	-0.11902
96.6484	-0.1236
96.6953	-0.13275
96.75	-0.14038
96.7969	-0.14648
96.8516	-0.15411
96.8984	-0.15869
96.9453	-0.16022
97	-0.16174
97.0469	-0.16022
97.1016	-0.16632
97.1484	-0.1709
97.1953	-0.17395
97.25	-0.17853
97.2969	-0.17548
97.3516	-0.17548
97.3984	-0.17395
97.4453	-0.17853
97.5	-0.16785
97.5469	-0.16479
97.6016	-0.15869
97.6484	-0.15106
97.6953	-0.13275
97.75	-0.11749
97.7969	-0.0946
97.8516	-0.07629
97.8984	-0.06104
97.9453	-0.06104
98	-0.07019
98.0469	-0.07935
98.1016	-0.08087
98.1484	-0.07935
98.1953	-0.07629
98.25	-0.07629
98.2969	-0.07629
98.3516	-0.07477
98.3984	-0.06714
98.4453	-0.06409
98.5	-0.05493
98.5469	-0.0473
98.6016	-0.0351
98.6484	-0.03204
98.6953	-0.02594
98.75	-0.02747
98.7969	-0.02136
98.8516	-0.02441
98.8984	-0.03357
98.9453	-0.03815
99	-0.0351
99.0469	-0.03204
99.1016	-0.02747
99.1484	-0.03052
99.1953	-0.03357
99.25	-0.03815
99.2969	-0.0351
99.3516	-0.02899
99.3984	-0.02289
99.4453	-0.01526
99.5	-0.00916
99.5469	-0.01526
99.6016	-0.02289
99.6484	-0.02747
99.6953	-0.02441
99.75	-0.01831
99.7969	-0.01678
99.8516	-0.01831
[truncated: 98,003 more rows]
