# Supplementary material for: The cation channel mechanisms of subthreshold inward depolarizing currents in the mice VTA dopaminergic neurons and their roles in the chronic-stress-induced depression-like behavior
Source: eLife. 2024 Dec 6;12:RP88319. doi: 10.7554/eLife.88319 (PMC11623934; doi:10.7554/eLife.88319)
Supplement: Figure 3—source data 10. [file elife-88319-fig3-data10.xlsx]

## Sheet: Figure 3Ji up
con
Time(ms)	RMP(mV)
0	-52.002
0.09961	-52.124
0.2002	-51.9714
0.2998	-51.9714
0.40039	-51.9714
0.5	-52.002
0.59961	-52.002
0.7002	-51.9104
0.7998	-52.002
0.90039	-51.9714
1	-52.0325
1.09961	-51.9714
1.2002	-51.9409
1.2998	-52.0325
1.40039	-51.9714
1.5	-51.9104
1.59961	-51.9104
1.7002	-52.0325
1.7998	-51.9714
1.90039	-52.0935
2	-51.8494
2.09961	-51.9409
2.2002	-51.9409
2.2998	-51.9714
2.40039	-51.9104
2.5	-52.063
2.59961	-51.9409
2.7002	-51.9104
2.7998	-52.0325
2.90039	-51.9104
3	-52.063
3.09961	-52.002
3.2002	-52.002
3.2998	-51.9409
3.40039	-51.9714
3.5	-52.002
3.59961	-52.002
3.7002	-52.124
3.7998	-52.002
3.90039	-52.1545
4	-52.002
4.09961	-52.063
4.2002	-52.0325
4.2998	-51.9714
4.40039	-52.0935
4.5	-52.0935
4.59961	-52.0325
4.7002	-52.124
4.7998	-52.1851
4.90039	-52.063
5	-52.124
5.09961	-52.0325
5.2002	-52.124
5.2998	-52.063
5.40039	-52.002
5.5	-52.1545
5.59961	-52.0325
5.7002	-52.1545
5.7998	-51.9714
5.90039	-52.1851
6	-52.0325
6.09961	-52.0935
6.2002	-52.063
6.2998	-52.1545
6.40039	-52.2766
6.5	-52.0325
6.59961	-52.063
6.7002	-52.063
6.7998	-52.124
6.90039	-52.0935
7	-52.063
7.09961	-52.002
7.2002	-52.1545
7.2998	-52.0935
7.40039	-51.9104
7.5	-52.1851
7.59961	-52.063
7.7002	-52.1545
7.7998	-52.124
7.90039	-52.063
8	-51.9714
8.09961	-52.1545
8.2002	-51.9409
8.2998	-52.0935
8.40039	-52.2156
8.5	-51.9409
8.59961	-52.1851
8.7002	-52.063
8.7998	-52.063
8.90039	-52.063
9	-52.063
9.09961	-52.0325
9.2002	-52.124
9.2998	-52.2461
9.40039	-52.063
9.5	-52.124
9.59961	-52.124
9.7002	-52.2156
9.7998	-52.063
9.90039	-52.1545
10	-52.002
10.0996	-52.124
10.2002	-52.1545
10.2998	-52.1545
10.4004	-52.2156
10.5	-52.1851
10.5996	-52.1851
10.7002	-52.0935
10.7998	-52.1851
10.9004	-52.124
11	-52.1851
11.0996	-52.2766
11.2002	-52.1851
11.2998	-52.3376
11.4004	-52.063
11.5	-52.1851
11.5996	-52.1545
11.7002	-52.1851
11.7998	-52.1851
11.9004	-52.2156
12	-52.2156
12.0996	-52.3682
12.2002	-52.3682
12.2998	-52.1851
12.4004	-52.2766
12.5	-52.063
12.5996	-52.2156
12.7002	-52.2461
12.7998	-52.1545
12.9004	-52.1851
13	-52.124
13.0996	-52.2156
13.2002	-52.1545
13.2998	-52.2461
13.4004	-52.124
13.5	-52.2156
13.5996	-52.0935
13.7002	-52.124
13.7998	-52.0935
13.9004	-52.124
14	-52.063
14.0996	-52.1545
14.2002	-52.002
14.2998	-52.2461
14.4004	-52.124
14.5	-52.0935
14.5996	-52.1851
14.7002	-52.063
14.7998	-52.0935
14.9004	-52.1851
15	-52.0325
15.0996	-52.1545
15.2002	-52.1545
15.2998	-52.1545
15.4004	-52.124
15.5	-52.124
15.5996	-52.0935
15.7002	-52.1851
15.7998	-52.1851
15.9004	-52.063
16	-52.1851
16.0996	-52.1851
16.2002	-52.1545
16.2998	-52.0935
16.4004	-52.0325
16.5	-51.9714
16.5996	-52.1545
16.7002	-52.063
16.7998	-52.1545
16.9004	-52.2156
17	-52.0325
17.0996	-52.3071
17.2002	-52.1545
17.2998	-52.1545
17.4004	-52.1851
17.5	-52.1545
17.5996	-52.1545
17.7002	-52.124
17.7998	-52.2156
17.9004	-52.124
18	-52.2461
18.0996	-52.1545
18.2002	-52.1545
18.2998	-52.1545
18.4004	-52.1545
18.5	-52.1545
18.5996	-52.124
18.7002	-52.1851
18.7998	-52.124
18.9004	-52.2156
19	-52.063
19.0996	-52.2461
19.2002	-52.1545
19.2998	-52.1851
19.4004	-52.0325
19.5	-52.1851
19.5996	-52.1545
19.7002	-52.1545
19.7998	-52.3071
19.9004	-52.063
20	-52.2461
20.0996	-52.0935
20.2002	-52.0935
20.2998	-52.063
20.4004	-52.0325
20.5	-52.1851
20.5996	-52.1851
20.7002	-52.1851
20.7998	-52.0935
20.9004	-52.2766
21	-52.063
21.0996	-52.124
21.2002	-52.0935
21.2998	-52.0325
21.4004	-52.1545
21.5	-52.063
21.5996	-52.1545
21.7002	-52.124
21.7998	-52.1851
21.9004	-52.063
22	-52.1851
22.0996	-51.9409
22.2002	-52.0325
22.2998	-52.1545
22.4004	-52.002
22.5	-52.2461
22.5996	-52.124
22.7002	-52.1545
22.7998	-52.0935
22.9004	-52.1851
23	-52.063
23.0996	-52.2156
23.2002	-52.124
23.2998	-52.124
23.4004	-52.2766
23.5	-52.063
23.5996	-52.2766
23.7002	-52.1545
23.7998	-52.2156
23.9004	-52.1851
24	-52.2766
24.0996	-52.124
24.2002	-52.2766
24.2998	-52.2766
24.4004	-52.124
24.5	-52.4292
24.5996	-52.1851
24.7002	-52.2766
24.7998	-52.2461
24.9004	-52.2461
25	-52.2461
25.0996	-52.2461
25.2002	-52.3071
25.2998	-52.3682
25.4004	-52.2766
25.5	-52.1545
25.5996	-52.3376
25.7002	-52.2156
25.7998	-52.3376
25.9004	-52.1851
26	-52.3376
26.0996	-52.2766
26.2002	-52.1851
26.2998	-52.3071
26.4004	-52.2156
26.5	-52.3987
26.5996	-52.2766
26.7002	-52.2156
26.7998	-52.1851
26.9004	-52.2461
27	-52.3682
27.0996	-52.2156
27.2002	-52.2156
27.2998	-52.2766
27.4004	-52.3376
27.5	-52.1851
27.5996	-52.3682
27.7002	-52.2766
27.7998	-52.1851
27.9004	-52.2766
28	-52.2461
28.0996	-52.3376
28.2002	-52.2766
28.2998	-52.3682
28.4004	-52.1851
28.5	-52.3071
28.5996	-52.2156
28.7002	-52.3376
28.7998	-52.2156
28.9004	-52.2156
29	-52.3376
29.0996	-52.3071
29.2002	-52.3376
29.2998	-52.2461
29.4004	-52.3987
29.5	-52.3376
29.5996	-52.3071
29.7002	-52.2766
29.7998	-52.2461
29.9004	-52.4902
30	-52.1851
30.0996	-52.3987
30.2002	-52.4292
30.2998	-52.4292
30.4004	-52.2766
30.5	-52.2461
30.5996	-52.3376
30.7002	-52.3376
30.7998	-52.4292
30.9004	-52.3071
31	-52.3987
31.0996	-52.3987
31.2002	-52.3682
31.2998	-52.4902
31.4004	-52.3987
31.5	-52.3987
31.5996	-52.4597
31.7002	-52.3071
31.7998	-52.4902
31.9004	-52.5207
32	-52.4597
32.0996	-52.5513
32.2002	-52.4902
32.2998	-52.4292
32.4004	-52.4292
32.5	-52.3987
32.5996	-52.3071
32.7002	-52.4292
32.7998	-52.5207
32.9004	-52.4292
33	-52.5207
33.0996	-52.3682
33.2002	-52.3987
33.2998	-52.3376
33.4004	-52.3682
33.5	-52.3376
33.5996	-52.3682
33.7002	-52.4292
33.7998	-52.3682
33.9004	-52.3682
34	-52.2156
34.0996	-52.4292
34.2002	-52.3376
34.2998	-52.3376
34.4004	-52.2766
34.5	-52.3071
34.5996	-52.4292
34.7002	-52.3071
34.7998	-52.3376
34.9004	-52.3071
35	-52.3376
35.0996	-52.2156
35.2002	-52.3376
35.2998	-52.2766
35.4004	-52.2461
35.5	-52.3987
35.5996	-52.3376
35.7002	-52.4902
35.7998	-52.2461
35.9004	-52.3682
36	-52.3376
36.0996	-52.3071
36.2002	-52.3376
36.2998	-52.3071
36.4004	-52.3071
36.5	-52.3071
36.5996	-52.3376
36.7002	-52.3071
36.7998	-52.4597
36.9004	-52.2766
37	-52.4597
37.0996	-52.2766
37.2002	-52.3376
37.2998	-52.3376
37.4004	-52.2766
37.5	-52.4902
37.5996	-52.3987
37.7002	-52.4292
37.7998	-52.3376
37.9004	-52.3987
38	-52.2766
38.0996	-52.4292
38.2002	-52.3376
38.2998	-52.3376
38.4004	-52.5207
38.5	-52.3071
38.5996	-52.4597
38.7002	-52.3987
38.7998	-52.3071
38.9004	-52.3987
39	-52.4292
39.0996	-52.2766
39.2002	-52.3682
39.2998	-52.4597
39.4004	-52.3071
39.5	-52.3987
39.5996	-52.3682
39.7002	-52.3376
39.7998	-52.3682
39.9004	-52.3071
40	-52.1851
40.0996	-52.3376
40.2002	-52.3987
40.2998	-52.2766
40.4004	-52.3987
40.5	-52.3071
40.5996	-52.4292
40.7002	-52.3376
40.7998	-52.3071
40.9004	-52.3071
41	-52.3682
41.0996	-52.2461
41.2002	-52.3682
41.2998	-52.3376
41.4004	-52.2156
41.5	-52.4292
41.5996	-52.2461
41.7002	-52.3987
41.7998	-52.2766
41.9004	-52.2766
42	-52.2461
42.0996	-52.2156
42.2002	-52.3071
42.2998	-52.2461
42.4004	-52.4292
42.5	-52.2461
42.5996	-52.4292
42.7002	-52.2156
42.7998	-52.2766
42.9004	-52.2766
43	-52.2766
43.0996	-52.4292
43.2002	-52.3071
43.2998	-52.4292
43.4004	-52.3987
43.5	-52.3682
43.5996	-52.3987
43.7002	-52.3376
43.7998	-52.3376
43.9004	-52.3682
44	-52.5513
44.0996	-52.3682
44.2002	-52.4597
44.2998	-52.4292
44.4004	-52.5207
44.5	-52.4292
44.5996	-52.4597
44.7002	-52.3682
44.7998	-52.4902
44.9004	-52.4597
45	-52.3987
45.0996	-52.5818
45.2002	-52.4902
45.2998	-52.4902
45.4004	-52.4597
45.5	-52.4292
45.5996	-52.2766
45.7002	-52.3987
45.7998	-52.5818
45.9004	-52.5207
46	-52.5818
46.0996	-52.3987
46.2002	-52.5207
46.2998	-52.4292
46.4004	-52.4902
46.5	-52.3682
46.5996	-52.3987
46.7002	-52.4292
46.7998	-52.3071
46.9004	-52.5513
47	-52.4597
47.0996	-52.4292
47.2002	-52.4902
47.2998	-52.3987
47.4004	-52.4292
47.5	-52.4597
47.5996	-52.3376
47.7002	-52.4597
47.7998	-52.4597
47.9004	-52.4597
48	-52.5207
48.0996	-52.4597
48.2002	-52.3376
48.2998	-52.4902
48.4004	-52.3987
48.5	-52.3987
48.5996	-52.4597
48.7002	-52.4597
48.7998	-52.3987
48.9004	-52.5207
49	-52.3071
49.0996	-52.5513
49.2002	-52.4902
49.2998	-52.5513
49.4004	-52.4292
49.5	-52.5513
49.5996	-52.4902
49.7002	-52.4902
49.7998	-52.6428
49.9004	-52.4292
50	-52.5818
50.0996	-52.5207
50.2002	-52.4902
50.2998	-52.4597
50.4004	-52.4597
50.5	-52.4902
50.5996	-52.4902
50.7002	-52.5818
50.7998	-52.5207
50.9004	-52.5207
51	-52.4597
51.0996	-52.5207
51.2002	-52.4902
51.2998	-52.4902
51.4004	-52.5818
51.5	-52.3987
51.5996	-52.5513
51.7002	-52.4292
51.7998	-52.5818
51.9004	-52.6123
52	-52.6733
52.0996	-52.5818
52.2002	-52.6123
52.2998	-52.5513
52.4004	-52.5207
52.5	-52.6123
52.5996	-52.6123
52.7002	-52.6123
52.7998	-52.6123
52.9004	-52.5818
53	-52.5207
53.0996	-52.5207
53.2002	-52.4597
53.2998	-52.4902
53.4004	-52.5513
53.5	-52.4902
53.5996	-52.5818
53.7002	-52.4597
53.7998	-52.5207
53.9004	-52.3682
54	-52.5207
54.0996	-52.3376
54.2002	-52.4597
54.2998	-52.4902
54.4004	-52.3682
54.5	-52.5207
54.5996	-52.4292
54.7002	-52.4902
54.7998	-52.3987
54.9004	-52.4292
55	-52.3376
55.0996	-52.4597
55.2002	-52.3682
55.2998	-52.3987
55.4004	-52.5513
55.5	-52.4902
55.5996	-52.5513
55.7002	-52.4292
55.7998	-52.3987
55.9004	-52.3376
56	-52.4597
56.0996	-52.4597
56.2002	-52.4597
56.2998	-52.5207
56.4004	-52.3682
56.5	-52.5513
56.5996	-52.4597
56.7002	-52.4597
56.7998	-52.4597
56.9004	-52.4597
57	-52.3682
57.0996	-52.5207
57.2002	-52.4902
57.2998	-52.3682
57.4004	-52.6123
57.5	-52.3682
57.5996	-52.6123
57.7002	-52.5207
57.7998	-52.3682
57.9004	-52.3987
58	-52.4292
58.0996	-52.4292
58.2002	-52.5207
58.2998	-52.5818
58.4004	-52.4292
58.5	-52.6123
58.5996	-52.4292
58.7002	-52.4902
58.7998	-52.4597
58.9004	-52.3376
59	-52.4902
59.0996	-52.3376
59.2002	-52.4597
59.2998	-52.4597
59.4004	-52.5207
59.5	-52.3987
59.5996	-52.4902
59.7002	-52.3376
59.7998	-52.3682
59.9004	-52.4292
60	-52.3987
60.0996	-52.4902
60.2002	-52.4597
60.2998	-52.4292
60.4004	-52.3987
60.5	-52.3376
60.5996	-52.3376
60.7002	-52.3987
60.7998	-52.3987
60.9004	-52.3071
61	-52.4597
61.0996	-52.2766
61.2002	-52.4292
61.2998	-52.3071
61.4004	-52.3987
61.5	-52.3376
61.5996	-52.4597
61.7002	-52.3071
61.7998	-52.3682
61.9004	-52.3682
62	-52.3376
62.0996	-52.3987
62.2002	-52.3071
62.2998	-52.3376
62.4004	-52.3071
62.5	-52.4292
62.5996	-52.3071
62.7002	-52.3376
62.7998	-52.4597
62.9004	-52.3071
63	-52.4902
63.0996	-52.3376
63.2002	-52.4597
63.2998	-52.3071
63.4004	-52.4292
63.5	-52.3376
63.5996	-52.3987
63.7002	-52.3987
63.7998	-52.3987
63.9004	-52.4292
64	-52.4902
64.0996	-52.4597
64.2002	-52.5818
64.2998	-52.3987
64.4004	-52.4902
64.5	-52.5207
64.5996	-52.4292
64.7002	-52.5207
64.7998	-52.5207
64.9004	-52.4902
65	-52.4902
65.0996	-52.3987
65.2002	-52.4292
65.2998	-52.4292
65.4004	-52.3682
65.5	-52.4597
65.5996	-52.4597
65.7002	-52.5207
65.7998	-52.5513
65.9004	-52.5818
66	-52.3682
66.0996	-52.4597
66.2002	-52.3682
66.2998	-52.3376
66.4004	-52.3682
66.5	-52.3682
66.5996	-52.4292
66.7002	-52.3987
66.7998	-52.4902
66.9004	-52.4292
67	-52.4902
67.0996	-52.3376
67.2002	-52.3376
67.2998	-52.3682
67.4004	-52.3682
67.5	-52.4597
67.5996	-52.4597
67.7002	-52.3987
67.7998	-52.4292
67.9004	-52.4292
68	-52.3071
68.0996	-52.4292
68.2002	-52.3376
68.2998	-52.3376
68.4004	-52.4902
68.5	-52.3071
68.5996	-52.5818
68.7002	-52.3376
68.7998	-52.4292
68.9004	-52.4597
69	-52.3682
69.0996	-52.3071
69.2002	-52.5207
69.2998	-52.3987
69.4004	-52.3682
69.5	-52.4597
69.5996	-52.4292
69.7002	-52.5513
69.7998	-52.4292
69.9004	-52.4292
70	-52.3682
70.0996	-52.3987
70.2002	-52.3682
70.2998	-52.4292
70.4004	-52.5207
70.5	-52.3987
70.5996	-52.5513
70.7002	-52.3376
70.7998	-52.4902
70.9004	-52.3376
71	-52.4902
71.0996	-52.3987
71.2002	-52.3987
71.2998	-52.4597
71.4004	-52.3376
71.5	-52.5207
71.5996	-52.3682
71.7002	-52.4902
71.7998	-52.3682
71.9004	-52.4597
72	-52.3987
72.0996	-52.4292
72.2002	-52.5818
72.2998	-52.3682
72.4004	-52.5818
72.5	-52.3682
72.5996	-52.5513
72.7002	-52.4902
72.7998	-52.3987
72.9004	-52.3376
73	-52.3987
73.0996	-52.4597
73.2002	-52.4292
73.2998	-52.4902
73.4004	-52.3376
73.5	-52.4292
73.5996	-52.3682
73.7002	-52.3376
73.7998	-52.2766
73.9004	-52.3376
74	-52.3682
74.0996	-52.3376
74.2002	-52.3987
74.2998	-52.3071
74.4004	-52.4902
74.5	-52.1851
74.5996	-52.3987
74.7002	-52.2461
74.7998	-52.2461
74.9004	-52.3682
75	-52.2156
75.0996	-52.3987
75.2002	-52.3376
75.2998	-52.3376
75.4004	-52.3376
75.5	-52.3987
75.5996	-52.3071
75.7002	-52.3376
75.7998	-52.2461
75.9004	-52.1851
76	-52.3682
76.0996	-52.2156
76.2002	-52.3682
76.2998	-52.3376
76.4004	-52.3376
76.5	-52.3071
76.5996	-52.3376
76.7002	-52.2156
76.7998	-52.3071
76.9004	-52.4292
77	-52.3071
77.0996	-52.3682
77.2002	-52.3071
77.2998	-52.3376
77.4004	-52.2766
77.5	-52.2766
77.5996	-52.2461
77.7002	-52.3071
77.7998	-52.3987
77.9004	-52.2461
78	-52.3987
78.0996	-52.3071
78.2002	-52.3071
78.2998	-52.2766
78.4004	-52.3376
78.5	-52.1851
78.5996	-52.3071
78.7002	-52.3071
78.7998	-52.2766
78.9004	-52.3682
79	-52.3071
79.0996	-52.3987
79.2002	-52.3071
79.2998	-52.2766
79.4004	-52.2156
79.5	-52.2156
79.5996	-52.2766
79.7002	-52.2156
79.7998	-52.3376
79.9004	-52.1851
80	-52.2766
80.0996	-52.2156
80.2002	-52.3071
80.2998	-52.124
80.4004	-52.1851
80.5	-52.2461
80.5996	-52.2766
80.7002	-52.1545
80.7998	-52.2156
80.9004	-52.3071
81	-52.3376
81.0996	-52.2461
81.2002	-52.2766
81.2998	-52.124
81.4004	-52.2156
81.5	-52.2461
81.5996	-52.1545
81.7002	-52.2461
81.7998	-52.2461
81.9004	-52.1851
82	-52.2156
82.0996	-52.063
82.2002	-52.0935
82.2998	-52.0935
82.4004	-52.124
82.5	-52.1851
82.5996	-52.2156
82.7002	-52.1545
82.7998	-52.1545
82.9004	-52.2461
83	-52.0935
83.0996	-52.2766
83.2002	-52.0935
83.2998	-52.1851
83.4004	-52.2461
83.5	-52.1545
83.5996	-52.3071
83.7002	-52.1545
83.7998	-52.3376
83.9004	-52.1545
84	-52.3376
84.0996	-52.1851
84.2002	-52.2156
84.2998	-52.3071
84.4004	-52.2156
84.5	-52.3682
84.5996	-52.2156
84.7002	-52.2766
84.7998	-52.2461
84.9004	-52.1851
85	-52.2156
85.0996	-52.3071
85.2002	-52.1545
85.2998	-52.2156
85.4004	-52.3071
85.5	-52.124
85.5996	-52.3071
85.7002	-52.124
85.7998	-52.2156
85.9004	-52.2461
86	-52.1851
86.0996	-52.1545
86.2002	-52.3071
86.2998	-52.3071
86.4004	-52.1545
86.5	-52.3376
86.5996	-52.1545
86.7002	-52.2461
86.7998	-52.1851
86.9004	-52.124
87	-52.2461
87.0996	-52.0935
87.2002	-52.1545
87.2998	-52.1851
87.4004	-52.2766
87.5	-52.1851
87.5996	-52.2766
87.7002	-52.1851
87.7998	-52.1545
87.9004	-52.002
88	-52.2461
88.0996	-52.2156
88.2002	-52.124
88.2998	-52.1851
88.4004	-52.1545
88.5	-52.1851
88.5996	-52.0935
88.7002	-52.124
88.7998	-52.124
88.9004	-52.1545
89	-52.124
89.0996	-52.124
89.2002	-52.1851
89.2998	-52.063
89.4004	-52.3376
89.5	-52.1545
89.5996	-52.2766
89.7002	-52.124
89.7998	-52.2156
89.9004	-52.1851
90	-52.2156
90.0996	-52.2156
90.2002	-52.1851
90.2998	-52.2461
90.4004	-52.124
90.5	-52.2766
90.5996	-52.124
90.7002	-52.2461
90.7998	-52.1545
90.9004	-52.1851
91	-52.2156
91.0996	-52.063
91.2002	-52.2156
91.2998	-52.1545
91.4004	-52.3071
91.5	-52.063
91.5996	-52.2461
91.7002	-52.0935
91.7998	-52.1545
91.9004	-52.2766
92	-52.124
92.0996	-52.3376
92.2002	-52.1851
92.2998	-52.2156
92.4004	-52.1851
92.5	-52.1545
92.5996	-52.0935
92.7002	-52.0935
92.7998	-52.3071
92.9004	-52.002
93	-52.2766
93.0996	-52.063
93.2002	-52.1851
93.2998	-52.124
93.4004	-52.063
93.5	-52.063
93.5996	-52.124
93.7002	-52.0935
93.7998	-52.124
93.9004	-52.124
94	-52.0325
94.0996	-52.1545
94.2002	-52.0935
94.2998	-52.063
94.4004	-52.063
94.5	-52.002
94.5996	-52.063
94.7002	-52.0325
94.7998	-52.1545
94.9004	-51.9714
95	-52.0935
95.0996	-51.9714
95.2002	-52.1545
95.2998	-52.0325
95.4004	-52.002
95.5	-52.0935
95.5996	-52.124
95.7002	-52.0935
95.7998	-52.002
95.9004	-52.0935
96	-51.9714
96.0996	-52.0325
96.2002	-52.0935
96.2998	-52.002
96.4004	-52.063
96.5	-52.0325
96.5996	-52.063
96.7002	-51.9714
96.7998	-52.124
96.9004	-52.0325
97	-52.1545
97.0996	-52.0325
97.2002	-52.0935
97.2998	-51.9714
97.4004	-51.9714
97.5	-52.002
97.5996	-52.0325
97.7002	-52.002
97.7998	-52.0935
97.9004	-52.002
98	-52.0325
98.0996	-52.0325
98.2002	-51.9714
98.2998	-52.0325
98.4004	-52.063
98.5	-52.002
98.5996	-52.063
98.7002	-52.002
98.7998	-52.0935
98.9004	-52.002
99	-52.063
99.0996	-51.9714
99.2002	-52.0935
99.2998	-52.002
99.4004	-51.9409
99.5	-52.0325
99.5996	-52.002
99.7002	-51.9714
99.7998	-52.063
99.9004	-52.002
100	-51.9104
100.1	-51.9409
100.2	-51.8799
100.3	-51.9409
100.4	-51.9714
100.5	-51.9104
100.6	-52.0325
100.7	-51.9714
100.8	-52.002
100.9	-51.9409
101	-52.0325
101.1	-51.8188
101.2	-51.9714
101.3	-51.9409
101.4	-51.7883
101.5	-52.063
101.6	-51.9104
101.7	-51.9714
101.8	-51.9409
101.9	-51.9104
102	-51.8494
102.1	-51.8494
102.2	-51.8799
102.3	-51.8494
102.4	-52.063
102.5	-51.8494
102.6	-52.0325
102.7	-51.8188
102.8	-51.8494
102.9	-51.8188
103	-51.9104
103.1	-51.8799
103.2	-51.9714
103.3	-51.9714
103.4	-51.9409
103.5	-51.9409
103.6	-51.8799
103.7	-51.9409
103.8	-51.8799
103.9	-51.9409
104	-52.002
104.1	-51.8494
104.2	-52.002
104.3	-51.8799
104.4	-52.002
104.5	-51.8799
104.6	-52.0325
104.7	-51.9714
104.8	-51.9104
104.9	-51.8494
105	-51.8799
105.1	-52.063
105.2	-51.9714
105.3	-51.9714
105.4	-51.9409
105.5	-51.9409
105.6	-51.8188
105.7	-51.8799
105.8	-51.7578
105.9	-51.8799
106	-52.002
106.1	-51.9104
106.2	-52.0325
106.3	-51.8494
106.4	-52.0325
106.5	-51.8799
106.6	-51.9104
106.7	-51.8799
106.8	-51.7883
106.9	-51.8799
107	-51.8799
107.1	-51.9714
107.2	-51.9409
107.3	-51.9409
107.4	-51.8799
107.5	-51.9104
107.6	-51.8188
107.7	-51.8188
107.8	-51.9409
107.9	-51.7883
108	-51.8799
108.1	-51.8799
108.2	-51.9409
108.3	-51.7578
108.4	-51.9104
108.5	-51.8188
108.6	-51.8799
108.7	-51.8494
108.8	-51.8799
108.9	-51.9714
109	-51.7883
109.1	-51.9409
109.2	-51.9409
109.3	-51.7883
109.4	-51.8799
109.5	-51.8494
109.6	-51.8494
109.7	-51.8799
109.8	-51.9714
109.9	-51.7883
110	-51.9104
110.1	-51.9104
110.2	-51.8799
110.3	-51.8494
110.4	-51.7883
110.5	-51.8799
110.6	-51.9714
110.7	-51.8494
110.8	-51.9104
110.9	-51.9714
111	-51.8799
111.1	-52.002
111.2	-51.9714
111.3	-51.9409
111.4	-52.002
111.5	-51.9104
111.6	-51.9409
111.7	-51.8799
111.8	-51.9409
111.9	-51.7883
112	-52.0325
112.1	-51.8494
112.2	-52.124
112.3	-51.8799
112.4	-51.8494
112.5	-51.9714
112.6	-51.8188
112.7	-52.002
112.8	-51.8494
112.9	-51.9714
113	-51.8799
113.1	-51.9104
113.2	-51.8799
113.3	-51.7578
113.4	-51.9104
113.5	-51.7883
113.6	-51.9409
113.7	-51.8188
113.8	-51.8188
113.9	-51.8799
114	-51.8188
114.1	-51.6968
114.2	-51.8494
114.3	-51.6968
114.4	-51.8494
114.5	-51.7273
114.6	-51.6968
114.7	-51.7883
114.8	-51.7273
114.9	-51.8188
115	-51.8188
115.1	-51.7883
115.2	-51.6968
115.3	-51.6663
115.4	-51.8494
115.5	-51.6968
115.6	-51.7883
115.7	-51.7883
115.8	-51.8799
115.9	-51.7578
116	-51.8799
116.1	-51.6357
116.2	-51.7883
116.3	-51.8799
116.4	-51.7273
116.5	-51.8188
116.6	-51.8188
116.7	-51.7883
116.8	-51.8799
116.9	-51.7883
117	-51.6357
117.1	-51.7883
117.2	-51.8188
117.3	-51.7273
117.4	-51.9409
117.5	-51.6968
117.6	-51.9104
117.7	-51.7883
117.8	-51.7883
117.9	-51.7883
118	-51.8799
118.1	-51.7273
118.2	-51.8494
118.3	-51.8188
118.4	-51.7273
118.5	-51.9104
118.6	-51.6968
118.7	-51.7883
118.8	-51.8188
118.9	-51.7273
119	-51.8799
119.1	-51.6663
119.2	-51.8188
119.3	-51.7883
119.4	-51.8188
119.5	-51.6968
119.6	-51.8188
119.7	-51.7578
119.8	-51.6357
119.9	-51.7273
120	-51.6968
120.1	-51.8188
120.2	-51.8188
120.3	-51.6968
120.4	-51.7273
120.5	-51.8188
120.6	-51.7578
120.7	-51.7273
120.8	-51.6663
120.9	-51.6357
121	-51.7883
121.1	-51.7273
121.2	-51.7883
121.3	-51.7883
121.4	-51.7578
121.5	-51.7273
121.6	-51.7578
121.7	-51.5747
121.8	-51.6968
121.9	-51.6357
122	-51.6968
122.1	-51.7578
122.2	-51.6357
122.3	-51.6968
122.4	-51.7273
122.5	-51.7578
122.6	-51.6052
122.7	-51.6968
122.8	-51.6663
122.9	-51.6357
123	-51.7578
123.1	-51.6357
123.2	-51.8188
123.3	-51.6357
123.4	-51.7578
123.5	-51.6968
123.6	-51.7273
123.7	-51.6968
123.8	-51.7273
123.9	-51.7883
124	-51.7578
124.1	-51.8188
124.2	-51.7273
124.3	-51.7883
124.4	-51.7578
124.5	-51.8188
124.6	-51.6663
124.7	-51.6968
124.8	-51.8799
124.9	-51.6663
125	-51.8799
125.1	-51.7578
125.2	-51.9409
125.3	-51.8799
125.4	-51.6968
125.5	-51.6357
125.6	-51.6663
125.7	-51.7273
125.8	-51.7883
125.9	-51.8188
126	-51.6968
126.1	-51.8188
126.2	-51.7273
126.3	-51.6663
126.4	-51.6663
126.5	-51.7883
126.6	-51.7883
126.7	-51.6968
126.8	-51.8494
126.9	-51.6052
127	-51.9104
127.1	-51.7273
127.2	-51.7273
127.3	-51.6968
127.4	-51.6663
127.5	-51.6968
127.6	-51.6663
127.7	-51.7883
127.8	-51.6968
127.9	-51.8188
128	-51.5747
128.1	-51.7578
128.2	-51.7578
128.3	-51.7578
128.4	-51.7883
128.5	-51.6663
128.6	-51.7273
128.7	-51.6663
128.8	-51.7883
128.9	-51.6968
129	-51.7273
129.1	-51.6663
129.2	-51.8799
129.3	-51.6357
129.4	-51.6968
129.5	-51.8494
129.6	-51.6968
129.7	-51.7883
129.8	-51.7273
129.9	-51.8188
130	-51.7273
130.1	-51.7883
130.2	-51.7273
130.3	-51.6663
130.4	-51.7883
130.5	-51.7273
130.6	-51.7883
130.7	-51.7883
130.8	-51.8494
130.9	-51.8188
131	-51.7273
131.1	-51.8188
131.2	-51.8188
131.3	-51.8188
131.4	-51.7578
131.5	-51.7883
131.6	-51.8188
131.7	-51.8188
131.8	-51.7883
131.9	-51.6968
132	-51.8494
132.1	-51.9104
132.2	-51.9409
132.3	-51.8188
132.4	-51.9104
132.5	-51.7273
132.6	-51.8494
132.7	-51.7883
132.8	-51.8494
132.9	-51.7273
133	-51.8494
133.1	-51.7578
133.2	-51.7883
133.3	-51.8494
133.4	-51.6968
133.5	-51.8799
133.6	-51.7578
133.7	-51.7273
133.8	-51.7273
133.9	-51.7273
134	-51.6968
134.1	-51.6663
134.2	-51.7883
134.3	-51.6663
134.4	-51.7578
134.5	-51.6052
134.6	-51.7578
134.7	-51.7578
134.8	-51.7273
134.9	-51.6052
135	-51.7578
135.1	-51.6663
135.2	-51.7273
135.3	-51.7578
135.4	-51.6052
135.5	-51.9104
135.6	-51.6968
135.7	-51.7883
135.8	-51.7883
135.9	-51.5747
136	-51.8494
136.1	-51.6968
136.2	-51.7883
136.3	-51.7883
136.4	-51.8799
136.5	-51.7578
136.6	-51.8494
136.7	-51.6663
136.8	-51.7273
136.9	-51.7883
137	-51.7273
137.1	-51.8188
137.2	-51.7578
137.3	-51.7578
137.4	-51.8188
137.5	-51.8494
137.6	-51.7273
137.7	-51.7883
137.8	-51.7273
137.9	-51.7273
138	-51.9104
138.1	-51.6968
138.2	-51.8799
138.3	-51.7883
138.4	-51.8188
138.5	-51.7273
138.6	-51.8188
138.7	-51.7273
138.8	-51.7883
138.9	-51.7273
139	-51.7883
139.1	-51.8799
139.2	-51.7578
139.3	-51.8494
139.4	-51.8494
139.5	-51.8188
139.6	-51.6357
139.7	-51.8188
139.8	-51.8494
139.9	-51.6663
140	-51.9104
140.1	-51.7578
140.2	-51.8494
140.3	-51.7883
140.4	-51.7273
140.5	-51.6357
140.6	-51.8494
140.7	-51.8188
140.8	-51.7273
140.9	-51.8188
141	-51.7578
141.1	-51.7883
141.2	-51.7273
141.3	-51.6968
141.4	-51.7273
141.5	-51.8494
141.6	-51.7883
141.7	-51.6663
141.8	-51.8494
141.9	-51.6968
142	-51.8494
142.1	-51.6663
142.2	-51.6663
142.3	-51.6968
142.4	-51.6968
142.5	-51.7883
142.6	-51.7883
142.7	-51.8188
142.8	-51.6968
142.9	-51.7883
143	-51.7273
143.1	-51.8494
143.2	-51.8494
143.3	-51.7578
143.4	-51.7273
143.5	-51.7883
143.6	-51.7578
143.7	-51.8188
143.8	-51.8799
143.9	-51.8494
144	-52.002
144.1	-51.7578
144.2	-51.9409
144.3	-51.8188
144.4	-51.7883
144.5	-51.9714
144.6	-51.7883
144.7	-51.8799
144.8	-51.8494
144.9	-51.9104
145	-51.9409
145.1	-51.9104
145.2	-51.8188
145.3	-51.8188
145.4	-51.8799
145.5	-51.7578
145.6	-51.9104
145.7	-51.8494
145.8	-51.9409
145.9	-51.8799
146	-51.8494
146.1	-51.6663
146.2	-51.8799
146.3	-51.8188
146.4	-51.7883
146.5	-51.9409
146.6	-51.8188
146.7	-51.8799
146.8	-51.8799
146.9	-51.8494
147	-51.7883
147.1	-51.9104
147.2	-51.8188
147.3	-51.8799
147.4	-51.8494
147.5	-51.8188
147.6	-52.002
147.7	-51.8799
147.8	-51.8188
147.9	-51.8494
148	-51.8494
148.1	-51.8494
148.2	-51.9409
148.3	-51.8494
148.4	-51.8494
148.5	-51.8799
148.6	-51.8188
148.7	-51.9409
148.8	-51.9104
148.9	-51.8799
149	-51.8799
149.1	-51.7578
149.2	-51.9714
149.3	-51.9104
149.4	-51.9409
149.5	-51.8799
149.6	-51.9409
149.7	-51.8799
149.8	-51.8494
149.9	-51.8188
150	-51.9104
150.1	-51.9104
150.2	-51.9409
150.3	-51.9409
150.4	-51.9104
150.5	-52.002
150.6	-51.9409
150.7	-51.8799
150.8	-51.8799
150.9	-51.9714
151	-51.9104
151.1	-51.9104
151.2	-51.9714
151.3	-51.9714
151.4	-52.124
151.5	-51.8494
151.6	-52.0325
151.7	-51.9409
151.8	-51.9409
151.9	-51.9104
152	-51.9714
152.1	-52.0325
152.2	-52.0325
152.3	-52.063
152.4	-51.9104
152.5	-52.063
152.6	-51.8799
152.7	-51.9714
152.8	-52.0325
152.9	-51.8799
153	-52.0935
153.1	-51.9104
153.2	-52.0325
153.3	-51.9104
153.4	-52.002
153.5	-51.8494
153.6	-51.9409
153.7	-51.8494
153.8	-51.8494
153.9	-51.9409
154	-51.8494
154.1	-51.9409
154.2	-51.9104
154.3	-51.9104
154.4	-51.9104
154.5	-51.9104
154.6	-51.7273
154.7	-51.9104
154.8	-51.9409
154.9	-51.7883
155	-52.063
155.1	-51.7578
155.2	-51.9409
155.3	-51.8799
155.4	-51.8494
155.5	-51.8188
155.6	-51.9104
155.7	-51.9409
155.8	-51.9714
155.9	-51.9104
156	-51.8494
156.1	-52.063
156.2	-51.8799
156.3	-52.002
156.4	-51.9409
156.5	-51.9714
156.6	-51.9104
156.7	-51.9104
156.8	-52.0325
156.9	-51.9104
157	-51.9409
157.1	-51.9409
157.2	-52.0935
157.3	-51.8799
157.4	-51.9409
157.5	-51.8494
157.6	-51.9714
157.7	-52.063
157.8	-51.9104
157.9	-52.002
158	-51.9104
158.1	-52.0325
158.2	-52.0325
158.3	-51.9409
158.4	-51.8799
158.5	-52.002
158.6	-52.002
158.7	-51.8188
158.8	-52.0935
158.9	-51.8799
159	-52.124
159.1	-51.8799
159.2	-51.9714
159.3	-51.8799
159.4	-51.9104
159.5	-51.8799
159.6	-51.8799
159.7	-52.002
159.8	-51.9409
159.9	-52.063
160	-51.8799
160.1	-51.9409
160.2	-51.9104
160.3	-51.9104
160.4	-52.002
160.5	-51.8494
160.6	-52.0325
160.7	-51.9104
160.8	-51.9409
160.9	-51.9104
161	-52.002
161.1	-51.8494
161.2	-51.8799
161.3	-52.002
161.4	-51.8494
161.5	-52.063
161.6	-51.9714
161.7	-51.9104
161.8	-51.9714
161.9	-51.9104
162	-51.8188
162.1	-51.8799
162.2	-51.8188
162.3	-51.8494
162.4	-51.9714
162.5	-51.8188
162.6	-52.0325
162.7	-51.9409
162.8	-51.9104
162.9	-51.8799
163	-51.9409
163.1	-51.8494
163.2	-52.002
163.3	-52.002
163.4	-51.8799
163.5	-52.124
163.6	-51.8799
163.7	-52.0935
163.8	-52.002
163.9	-52.002
164	-52.002
164.1	-51.9714
164.2	-51.9104
164.3	-52.063
164.4	-51.9409
164.5	-52.002
164.6	-52.0325
164.7	-52.063
164.8	-52.063
164.9	-52.002
165	-52.0935
165.1	-52.0325
165.2	-52.063
165.3	-52.0935
165.4	-51.9104
165.5	-52.002
165.6	-52.002
165.7	-52.063
165.8	-52.0325
165.9	-52.063
166	-52.124
166.1	-52.0325
166.2	-52.0325
166.3	-51.9104
166.4	-52.0325
166.5	-52.002
166.6	-52.124
166.7	-52.002
166.8	-52.002
166.9	-52.002
167	-51.9714
167.1	-52.0935
167.2	-51.9409
167.3	-52.0325
167.4	-52.0325
167.5	-51.9714
167.6	-52.002
167.7	-51.9714
167.8	-51.9409
167.9	-52.0325
168	-52.0935
168.1	-51.9104
168.2	-52.0935
168.3	-52.063
168.4	-52.063
168.5	-51.9409
168.6	-52.063
168.7	-52.002
168.8	-51.9714
168.9	-52.0325
169	-52.002
169.1	-52.0935
169.2	-52.002
169.3	-52.0935
169.4	-52.0325
169.5	-52.063
169.6	-51.9104
169.7	-52.124
169.8	-52.1545
169.9	-51.9714
170	-52.1545
170.1	-51.9409
170.2	-52.1545
170.3	-52.063
170.4	-52.063
170.5	-51.9409
170.6	-52.2156
170.7	-52.063
170.8	-51.9714
170.9	-52.1851
171	-52.002
171.1	-52.1545
171.2	-52.1545
171.3	-52.063
171.4	-52.124
171.5	-52.0935
171.6	-52.063
171.7	-52.063
171.8	-52.1851
171.9	-52.0935
172	-52.2766
172.1	-52.0935
172.2	-52.2461
172.3	-52.1545
172.4	-52.0935
172.5	-52.063
172.6	-52.0935
172.7	-52.124
172.8	-52.1851
172.9	-52.124
173	-52.0325
173.1	-52.2461
173.2	-52.063
173.3	-52.0325
173.4	-52.002
173.5	-52.002
173.6	-52.1545
173.7	-52.002
173.8	-52.124
173.9	-52.002
174	-52.0935
174.1	-52.002
174.2	-52.124
174.3	-51.9409
174.4	-52.0325
174.5	-51.9714
174.6	-51.9409
174.7	-52.002
174.8	-52.0325
174.9	-52.063
175	-51.9409
175.1	-52.002
175.2	-51.8799
175.3	-52.0325
175.4	-52.063
175.5	-52.063
175.6	-52.1851
175.7	-52.002
175.8	-52.1545
175.9	-52.002
176	-52.0325
176.1	-51.9409
176.2	-52.0325
176.3	-52.063
176.4	-52.063
176.5	-52.063
176.6	-52.063
176.7	-52.0935
176.8	-52.0325
176.9	-52.1545
177	-52.0325
177.1	-51.9714
177.2	-51.9714
177.3	-52.002
177.4	-52.1545
177.5	-52.0325
177.6	-52.0935
177.7	-52.063
177.8	-52.1545
177.9	-52.002
178	-52.124
178.1	-51.9409
178.2	-52.063
178.3	-52.2156
178.4	-52.0325
178.5	-52.2156
178.6	-52.0935
178.7	-52.0935
178.8	-52.124
178.9	-52.063
179	-52.0325
179.1	-52.063
179.2	-52.0325
179.3	-52.0325
179.4	-52.1851
179.5	-51.9104
179.6	-52.2461
179.7	-52.0935
179.8	-52.0325
179.9	-52.0325
180	-52.0935
180.1	-52.0325
180.2	-52.124
180.3	-52.1545
180.4	-52.002
180.5	-52.124
180.6	-52.1545
180.7	-52.0935
180.8	-52.0325
180.9	-51.9104
181	-51.9409
181.1	-52.063
181.2	-52.0325
181.3	-52.002
181.4	-52.0325
181.5	-51.9409
181.6	-52.063
181.7	-52.0325
181.8	-52.0325
181.9	-52.002
182	-51.8799
182.1	-51.9409
182.2	-51.9104
182.3	-51.9409
182.4	-52.063
182.5	-51.9714
182.6	-52.0325
182.7	-52.063
182.8	-51.9104
182.9	-51.9714
183	-52.0935
183.1	-52.0325
183.2	-52.0935
183.3	-52.063
183.4	-52.124
183.5	-52.002
183.6	-52.0935
183.7	-52.063
183.8	-52.124
183.9	-52.124
184	-52.063
184.1	-52.2461
184.2	-52.0935
184.3	-52.1545
184.4	-52.1851
184.5	-52.1545
184.6	-52.063
184.7	-52.063
184.8	-52.124
184.9	-52.1545
185	-52.2461
185.1	-52.1545
185.2	-52.1851
185.3	-52.0935
185.4	-52.2156
185.5	-52.002
185.6	-52.1545
185.7	-52.0935
185.8	-52.063
185.9	-52.2461
186	-52.1545
186.1	-52.0935
186.2	-52.124
186.3	-52.0325
186.4	-52.124
186.5	-52.1545
186.6	-51.9714
186.7	-52.1545
186.8	-52.2156
186.9	-52.002
187	-52.2156
187.1	-52.124
187.2	-52.1545
187.3	-52.124
187.4	-52.063
187.5	-52.063
187.6	-52.1545
187.7	-52.063
187.8	-52.063
187.9	-52.1851
188	-52.002
188.1	-52.2156
188.2	-52.2156
188.3	-52.0325
188.4	-52.0935
188.5	-52.0325
188.6	-52.0935
188.7	-52.063
188.8	-52.124
188.9	-52.0935
189	-52.2766
189.1	-51.9409
189.2	-52.1851
189.3	-52.063
189.4	-52.063
189.5	-52.063
189.6	-52.0935
189.7	-52.0935
189.8	-52.0935
189.9	-52.2461
190	-52.0935
190.1	-52.2156
190.2	-52.063
190.3	-52.0935
190.4	-52.2156
190.5	-52.002
190.6	-52.2766
190.7	-52.124
190.8	-52.2461
190.9	-52.124
191	-52.2156
191.1	-52.1545
191.2	-52.2156
191.3	-52.063
191.4	-52.1545
191.5	-52.3682
191.6	-52.1851
191.7	-52.3071
191.8	-52.1851
191.9	-52.2156
192	-52.2461
192.1	-52.2156
192.2	-52.2461
192.3	-52.1851
192.4	-52.2156
192.5	-52.0935
192.6	-52.2766
192.7	-52.0935
192.8	-52.2766
192.9	-52.124
193	-52.2156
193.1	-52.002
193.2	-52.124
193.3	-52.1545
193.4	-52.063
193.5	-52.2156
193.6	-52.063
193.7	-52.1545
193.8	-52.0935
193.9	-52.0935
194	-52.063
194.1	-52.0325
194.2	-52.0935
194.3	-52.002
194.4	-52.1851
194.5	-51.9409
194.6	-52.063
194.7	-52.0935
194.8	-52.063
194.9	-52.0325
195	-52.1545
195.1	-52.002
195.2	-52.124
195.3	-52.1545
195.4	-51.9714
195.5	-52.2156
195.6	-52.0935
195.7	-52.1545
195.8	-52.0935
195.9	-52.002
196	-52.063
196.1	-52.002
196.2	-52.1545
196.3	-52.063
196.4	-52.2766
196.5	-52.063
196.6	-52.2156
196.7	-52.0935
196.8	-52.0325
196.9	-52.0935
197	-52.063
197.1	-52.0325
197.2	-52.124
197.3	-52.063
197.4	-52.1851
197.5	-52.1851
197.6	-52.0935
197.7	-52.0935
197.8	-52.0935
197.9	-52.063
198	-52.1545
198.1	-52.063
198.2	-52.063
198.3	-52.124
198.4	-52.124
198.5	-52.0935
198.6	-52.063
198.7	-52.002
198.8	-52.1851
198.9	-52.0935
199	-52.0935
199.1	-52.1545
199.2	-52.124
199.3	-52.1545
199.4	-52.124
199.5	-52.063
199.6	-51.9714
199.7	-52.124
[truncated: 98,003 more rows]

## Sheet: Figure 3Ji down
			CON	NALCN-KD
			-46.6	-55.08
			-51.54	-59.69
			-52.43	-70.31
			-45.81	-57.71
			-50.42	-55.24
			-51.85	-64.74
			-51.54	-60.18
			-53.89	-59.69
			-50.48	-62.84
			-51.33	-65.37
			-51.12	-63.54
			-50.42	-60.84
			-51.48	-60.23
			-53.92	-64.09
			-50.14	-67.26
				-66.36
				-58.41
				-66.8

## Sheet: Figure 3J ii
nalcn
Time(ms)	RMP(mV)
0	-67.5354
0.09961	-67.7795
0.19922	-67.5659
0.29883	-67.8406
0.39844	-67.5659
0.5	-67.749
0.59961	-67.6575
0.69922	-67.749
0.79883	-67.4744
0.89844	-67.6575
1	-67.8101
1.09961	-67.688
1.19922	-67.749
1.29883	-67.5964
1.39844	-67.7795
1.5	-67.5964
1.59961	-67.6575
1.69922	-67.5964
1.79883	-67.7185
1.89844	-67.7795
2	-67.6269
2.09961	-67.9016
2.19922	-67.7795
2.29883	-67.7795
2.39844	-67.688
2.5	-67.7185
2.59961	-67.6575
2.69922	-67.749
2.79883	-67.749
2.89844	-67.8101
3	-67.749
3.09961	-67.7185
3.19922	-67.749
3.29883	-67.749
3.39844	-67.7795
3.5	-67.6575
3.59961	-67.7185
3.69922	-67.5659
3.79883	-67.688
3.89844	-67.7185
4	-67.5964
4.09961	-67.688
4.19922	-67.6269
4.29883	-67.6575
4.39844	-67.5964
4.5	-67.688
4.59961	-67.5659
4.69922	-67.5049
4.79883	-67.6269
4.89844	-67.5659
5	-67.6575
5.09961	-67.6269
5.19922	-67.5659
5.29883	-67.688
5.39844	-67.7185
5.5	-67.6269
5.59961	-67.6269
5.69922	-67.5659
5.79883	-67.5964
5.89844	-67.6269
6	-67.5659
6.09961	-67.7185
6.19922	-67.688
6.29883	-67.6575
6.39844	-67.5964
6.5	-67.6575
6.59961	-67.6575
6.69922	-67.5659
6.79883	-67.8101
6.89844	-67.5964
7	-67.7795
7.09961	-67.6575
7.19922	-67.5964
7.29883	-67.5964
7.39844	-67.5964
7.5	-67.688
7.59961	-67.688
7.69922	-67.6575
7.79883	-67.6269
7.89844	-67.749
8	-67.5964
8.09961	-67.7795
8.19922	-67.6575
8.29883	-67.6575
8.39844	-67.6575
8.5	-67.5964
8.59961	-67.7795
8.69922	-67.6269
8.79883	-67.7795
8.89844	-67.6575
9	-67.749
9.09961	-67.6575
9.19922	-67.6575
9.29883	-67.6575
9.39844	-67.5659
9.5	-67.749
9.59961	-67.688
9.69922	-67.688
9.79883	-67.5964
9.89844	-67.7185
10	-67.5964
10.0996	-67.7795
10.1992	-67.5964
10.2988	-67.6269
10.3984	-67.749
10.5	-67.6269
10.5996	-67.6269
10.6992	-67.5659
10.7988	-67.688
10.8984	-67.5964
11	-67.688
11.0996	-67.4744
11.1992	-67.5964
11.2988	-67.6575
11.3984	-67.5964
11.5	-67.688
11.5996	-67.5964
11.6992	-67.6269
11.7988	-67.6575
11.8984	-67.688
12	-67.3828
12.0996	-67.5964
12.1992	-67.5659
12.2988	-67.5659
12.3984	-67.6575
12.5	-67.4744
12.5996	-67.5659
12.6992	-67.4744
12.7988	-67.5049
12.8984	-67.4133
13	-67.6575
13.0996	-67.5354
13.1992	-67.5659
13.2988	-67.749
13.3984	-67.4744
13.5	-67.7185
13.5996	-67.5659
13.6992	-67.5964
13.7988	-67.6575
13.8984	-67.6575
14	-67.5354
14.0996	-67.6575
14.1992	-67.8101
14.2988	-67.6575
14.3984	-67.8406
14.5	-67.688
14.5996	-67.688
14.6992	-67.8101
14.7988	-67.6575
14.8984	-67.749
15	-67.749
15.0996	-67.7795
15.1992	-67.7795
15.2988	-67.8101
15.3984	-67.688
15.5	-67.749
15.5996	-67.688
15.6992	-67.7185
15.7988	-67.5354
15.8984	-67.6269
16	-67.688
16.0996	-67.7185
16.1992	-67.6575
16.2988	-67.6575
16.3984	-67.8101
16.5	-67.6269
16.5996	-67.6575
16.6992	-67.6575
16.7988	-67.5354
16.8984	-67.7795
17	-67.749
17.0996	-67.7795
17.1992	-67.749
17.2988	-67.7185
17.3984	-67.6269
17.5	-67.749
17.5996	-67.5659
17.6992	-67.6575
17.7988	-67.6575
17.8984	-67.688
18	-67.7185
18.0996	-67.688
18.1992	-67.749
18.2988	-67.6575
18.3984	-67.7795
18.5	-67.6575
18.5996	-67.5964
18.6992	-67.7185
18.7988	-67.5964
18.8984	-67.8406
19	-67.749
19.0996	-67.688
19.1992	-67.6575
19.2988	-67.7185
19.3984	-67.688
19.5	-67.7795
19.5996	-67.6269
19.6992	-67.6575
19.7988	-67.6269
19.8984	-67.688
20	-67.7185
20.0996	-67.7795
20.1992	-67.7185
20.2988	-67.749
20.3984	-67.8101
20.5	-67.7185
20.5996	-67.7185
20.6992	-67.688
20.7988	-67.749
20.8984	-67.749
21	-67.688
21.0996	-67.7795
21.1992	-67.8406
21.2988	-67.7795
21.3984	-67.5659
21.5	-67.7185
21.5996	-67.7795
21.6992	-67.7795
21.7988	-67.8406
21.8984	-67.749
22	-67.8711
22.0996	-67.749
22.1992	-67.8711
22.2988	-67.749
22.3984	-67.8101
22.5	-67.749
22.5996	-67.9016
22.6992	-67.9321
22.7988	-67.9016
22.8984	-67.8711
23	-67.749
23.0996	-67.7795
23.1992	-67.749
23.2988	-67.7795
23.3984	-67.7185
23.5	-67.8101
23.5996	-67.8406
23.6992	-67.8101
23.7988	-67.8406
23.8984	-67.6575
24	-67.8406
24.0996	-67.6269
24.1992	-67.8101
24.2988	-67.688
24.3984	-67.6269
24.5	-67.8406
24.5996	-67.5964
24.6992	-67.8101
24.7988	-67.6575
24.8984	-67.749
25	-67.6575
25.0996	-67.688
25.1992	-67.688
25.2988	-67.6269
25.3984	-67.7185
25.5	-67.6269
25.5996	-67.749
25.6992	-67.6269
25.7988	-67.5964
25.8984	-67.688
26	-67.7185
26.0996	-67.749
26.1992	-67.688
26.2988	-67.688
26.3984	-67.688
26.5	-67.8101
26.5996	-67.6269
26.6992	-67.7795
26.7988	-67.688
26.8984	-67.7795
27	-67.6575
27.0996	-67.688
27.1992	-67.6269
27.2988	-67.688
27.3984	-67.8406
27.5	-67.688
27.5996	-67.7795
27.6992	-67.7185
27.7988	-67.7185
27.8984	-67.7185
28	-67.749
28.0996	-67.6575
28.1992	-67.749
28.2988	-67.8101
28.3984	-67.688
28.5	-67.8711
28.5996	-67.6575
28.6992	-67.8101
28.7988	-67.8101
28.8984	-67.688
29	-67.688
29.0996	-67.749
29.1992	-67.7795
29.2988	-67.688
29.3984	-67.7185
29.5	-67.5659
29.5996	-67.8101
29.6992	-67.7795
29.7988	-67.7795
29.8984	-67.6575
30	-67.7185
30.0996	-67.7795
30.1992	-67.8406
30.2988	-67.7185
30.3984	-67.6575
30.5	-67.7795
30.5996	-67.6575
30.6992	-67.7795
30.7988	-67.6575
30.8984	-67.5964
31	-67.749
31.0996	-67.688
31.1992	-67.688
31.2988	-67.8101
31.3984	-67.749
31.5	-67.5964
31.5996	-67.7795
31.6992	-67.5354
31.7988	-67.7185
31.8984	-67.5964
32	-67.6575
32.0996	-67.688
32.1992	-67.7185
32.2988	-67.6269
32.3984	-67.7795
32.5	-67.7185
32.5996	-67.6575
32.6992	-67.6575
32.7988	-67.5964
32.8984	-67.5659
33	-67.749
33.0996	-67.6575
33.1992	-67.7795
33.2988	-67.6575
33.3984	-67.6269
33.5	-67.5964
33.5996	-67.7185
33.6992	-67.5659
33.7988	-67.688
33.8984	-67.8711
34	-67.5964
34.0996	-67.8406
34.1992	-67.7185
34.2988	-67.749
34.3984	-67.7185
34.5	-67.749
34.5996	-67.749
34.6992	-67.8711
34.7988	-67.8101
34.8984	-67.688
35	-67.9321
35.0996	-67.7185
35.1992	-67.8101
35.2988	-67.7795
35.3984	-67.7185
35.5	-67.8406
35.5996	-67.8101
35.6992	-67.7795
35.7988	-67.749
35.8984	-67.9321
36	-67.749
36.0996	-67.8406
36.1992	-67.6575
36.2988	-67.6575
36.3984	-67.749
36.5	-67.8101
36.5996	-67.749
36.6992	-67.8101
36.7988	-67.6575
36.8984	-67.749
37	-67.8101
37.0996	-67.7185
37.1992	-67.7795
37.2988	-67.749
37.3984	-67.688
37.5	-67.749
37.5996	-67.7185
37.6992	-67.7185
37.7988	-67.8101
37.8984	-67.7185
38	-67.6269
38.0996	-67.9016
38.1992	-67.7185
38.2988	-67.7185
38.3984	-67.7185
38.5	-67.6575
38.5996	-67.8406
38.6992	-67.749
38.7988	-67.8101
38.8984	-67.7185
39	-67.8406
39.0996	-67.688
39.1992	-67.688
39.2988	-67.749
39.3984	-67.7185
39.5	-67.8406
39.5996	-67.7185
39.6992	-67.7795
39.7988	-67.8101
39.8984	-67.7795
40	-67.749
40.0996	-67.8101
40.1992	-67.7795
40.2988	-67.749
40.3984	-67.7795
40.5	-67.8101
40.5996	-67.8711
40.6992	-67.688
40.7988	-67.8406
40.8984	-67.8711
41	-67.8101
41.0996	-67.5964
41.1992	-67.8101
41.2988	-67.749
41.3984	-67.7795
41.5	-67.9626
41.5996	-67.8406
41.6992	-67.7185
41.7988	-67.8406
41.8984	-67.8101
42	-67.8406
42.0996	-67.8406
42.1992	-67.8711
42.2988	-67.749
42.3984	-67.9016
42.5	-67.749
42.5996	-67.8711
42.6992	-67.8711
42.7988	-67.9321
42.8984	-67.8406
43	-67.9016
43.0996	-67.7795
43.1992	-67.8711
43.2988	-67.8711
43.3984	-67.8406
43.5	-67.9016
43.5996	-67.8101
43.6992	-67.8101
43.7988	-67.8101
43.8984	-67.7795
44	-67.6575
44.0996	-67.8101
44.1992	-67.7795
44.2988	-67.749
44.3984	-67.8101
44.5	-67.688
44.5996	-67.7795
44.6992	-67.6575
44.7988	-67.7795
44.8984	-67.688
45	-67.749
45.0996	-67.8101
45.1992	-67.688
45.2988	-67.8101
45.3984	-67.688
45.5	-67.7185
45.5996	-67.688
45.6992	-67.688
45.7988	-67.749
45.8984	-67.5964
46	-67.749
46.0996	-67.8406
46.1992	-67.8101
46.2988	-67.7185
46.3984	-67.7795
46.5	-67.7185
46.5996	-67.7185
46.6992	-67.6575
46.7988	-67.7795
46.8984	-67.688
47	-67.749
47.0996	-67.8711
47.1992	-67.688
47.2988	-67.8406
47.3984	-67.6575
47.5	-67.8101
47.5996	-67.7795
47.6992	-67.749
47.7988	-67.688
47.8984	-67.749
48	-67.8101
48.0996	-67.7795
48.1992	-67.8101
48.2988	-67.749
48.3984	-67.8406
48.5	-67.6575
48.5996	-67.8101
48.6992	-67.688
48.7988	-67.749
48.8984	-67.7795
49	-67.688
49.0996	-67.8711
49.1992	-67.688
49.2988	-67.7795
49.3984	-67.7795
49.5	-67.7185
49.5996	-67.688
49.6992	-67.749
49.7988	-67.8101
49.8984	-67.7795
50	-67.7795
50.0996	-67.688
50.1992	-67.8406
50.2988	-67.6575
50.3984	-67.749
50.5	-67.688
50.5996	-67.688
50.6992	-67.7185
50.7988	-67.7185
50.8984	-67.7185
51	-67.688
51.0996	-67.688
51.1992	-67.6575
51.2988	-67.7185
51.3984	-67.7185
51.5	-67.5659
51.5996	-67.7185
51.6992	-67.6269
51.7988	-67.7795
51.8984	-67.6575
52	-67.688
52.0996	-67.6575
52.1992	-67.749
52.2988	-67.5659
52.3984	-67.749
52.5	-67.688
52.5996	-67.5659
52.6992	-67.7185
52.7988	-67.5964
52.8984	-67.6269
53	-67.749
53.0996	-67.6575
53.1992	-67.5964
53.2988	-67.6575
53.3984	-67.5049
53.5	-67.5354
53.5996	-67.6575
53.6992	-67.6269
53.7988	-67.7185
53.8984	-67.7185
54	-67.6575
54.0996	-67.688
54.1992	-67.7185
54.2988	-67.5964
54.3984	-67.8406
54.5	-67.7795
54.5996	-67.749
54.6992	-67.9016
54.7988	-67.7795
54.8984	-67.8406
55	-67.688
55.0996	-67.749
55.1992	-67.688
55.2988	-67.8406
55.3984	-67.7795
55.5	-67.6575
55.5996	-67.9016
55.6992	-67.7185
55.7988	-67.9016
55.8984	-67.8101
56	-67.7185
56.0996	-67.6575
56.1992	-67.7185
56.2988	-67.7185
56.3984	-67.8406
56.5	-67.8711
56.5996	-67.749
56.6992	-67.9016
56.7988	-67.8101
56.8984	-67.7795
57	-67.688
57.0996	-67.688
57.1992	-67.6575
57.2988	-67.8101
57.3984	-67.7795
57.5	-67.6269
57.5996	-67.8101
57.6992	-67.688
57.7988	-67.749
57.8984	-67.7185
58	-67.7185
58.0996	-67.7185
58.1992	-67.688
58.2988	-67.688
58.3984	-67.749
58.5	-67.8406
58.5996	-67.6575
58.6992	-67.8101
58.7988	-67.6575
58.8984	-67.7795
59	-67.688
59.0996	-67.6575
59.1992	-67.8101
59.2988	-67.688
59.3984	-67.7795
59.5	-67.7795
59.5996	-67.7185
59.6992	-67.6575
59.7988	-67.7795
59.8984	-67.7185
60	-67.6575
60.0996	-67.749
60.1992	-67.749
60.2988	-67.749
60.3984	-67.7185
60.5	-67.7795
60.5996	-67.8101
60.6992	-67.749
60.7988	-67.8406
60.8984	-67.688
61	-67.8101
61.0996	-67.749
61.1992	-67.9321
61.2988	-67.7185
61.3984	-67.8406
61.5	-67.7185
61.5996	-67.8406
61.6992	-67.749
61.7988	-67.9016
61.8984	-67.8406
62	-67.749
62.0996	-67.8101
62.1992	-67.7795
62.2988	-67.7795
62.3984	-67.9016
62.5	-67.7795
62.5996	-67.9016
62.6992	-67.8406
62.7988	-67.8406
62.8984	-67.7795
63	-67.9626
63.0996	-67.7185
63.1992	-67.9016
63.2988	-67.749
63.3984	-67.8101
63.5	-67.7795
63.5996	-67.8406
63.6992	-67.688
63.7988	-67.8101
63.8984	-67.7795
64	-67.7185
64.0996	-67.7795
64.1992	-67.749
64.2988	-67.7795
64.3984	-67.688
64.5	-67.749
64.5996	-67.5659
64.6992	-67.7185
64.7988	-67.7795
64.8984	-67.6575
65	-67.7795
65.0996	-67.5659
65.1992	-67.8711
65.2988	-67.6269
65.3984	-67.7795
65.5	-67.688
65.5996	-67.6575
65.6992	-67.6575
65.7988	-67.5354
65.8984	-67.8101
66	-67.7185
66.0996	-67.8406
66.1992	-67.6575
66.2988	-67.7185
66.3984	-67.688
66.5	-67.6575
66.5996	-67.6575
66.6992	-67.688
66.7988	-67.8101
66.8984	-67.749
67	-67.8406
67.0996	-67.7185
67.1992	-67.749
67.2988	-67.6575
67.3984	-67.749
67.5	-67.6575
67.5996	-67.688
67.6992	-67.7795
67.7988	-67.6269
67.8984	-67.8101
68	-67.6575
68.0996	-67.688
68.1992	-67.7185
68.2988	-67.749
68.3984	-67.6269
68.5	-67.8101
68.5996	-67.749
68.6992	-67.6269
68.7988	-67.8711
68.8984	-67.5964
69	-67.8406
69.0996	-67.7185
69.1992	-67.688
69.2988	-67.749
69.3984	-67.7185
69.5	-67.688
69.5996	-67.6575
69.6992	-67.8101
69.7988	-67.749
69.8984	-67.688
70	-67.7795
70.0996	-67.5964
70.1992	-67.688
70.2988	-67.6269
70.3984	-67.688
70.5	-67.6575
70.5996	-67.688
70.6992	-67.7185
70.7988	-67.749
70.8984	-67.5659
71	-67.7185
71.0996	-67.7185
71.1992	-67.5659
71.2988	-67.6575
71.3984	-67.688
71.5	-67.5964
71.5996	-67.6575
71.6992	-67.6575
71.7988	-67.6575
71.8984	-67.6575
72	-67.688
72.0996	-67.5354
72.1992	-67.6269
72.2988	-67.4438
72.3984	-67.7185
72.5	-67.5049
72.5996	-67.5964
72.6992	-67.4744
72.7988	-67.5964
72.8984	-67.5659
73	-67.6575
73.0996	-67.6269
73.1992	-67.5659
73.2988	-67.6575
73.3984	-67.5659
73.5	-67.6269
73.5996	-67.6575
73.6992	-67.5964
73.7988	-67.688
73.8984	-67.6269
74	-67.6269
74.0996	-67.5964
74.1992	-67.749
74.2988	-67.6575
74.3984	-67.7795
74.5	-67.7185
74.5996	-67.6575
74.6992	-67.7185
74.7988	-67.7795
74.8984	-67.5659
75	-67.7795
75.0996	-67.688
75.1992	-67.6575
75.2988	-67.8101
75.3984	-67.688
75.5	-67.7795
75.5996	-67.688
75.6992	-67.8406
75.7988	-67.7185
75.8984	-67.749
76	-67.5964
76.0996	-67.5659
76.1992	-67.749
76.2988	-67.688
76.3984	-67.8711
76.5	-67.749
76.5996	-67.6575
76.6992	-67.749
76.7988	-67.749
76.8984	-67.6575
77	-67.7185
77.0996	-67.749
77.1992	-67.6269
77.2988	-67.8101
77.3984	-67.5964
77.5	-67.6575
77.5996	-67.6575
77.6992	-67.688
77.7988	-67.5964
77.8984	-67.7185
78	-67.6575
78.0996	-67.6269
78.1992	-67.749
78.2988	-67.5964
78.3984	-67.7795
78.5	-67.6269
78.5996	-67.6575
78.6992	-67.5964
78.7988	-67.6269
78.8984	-67.688
79	-67.7185
79.0996	-67.7185
79.1992	-67.5964
79.2988	-67.8101
79.3984	-67.6269
79.5	-67.6269
79.5996	-67.6269
79.6992	-67.5659
79.7988	-67.749
79.8984	-67.6269
80	-67.749
80.0996	-67.5964
80.1992	-67.7185
80.2988	-67.688
80.3984	-67.8101
80.5	-67.5659
80.5996	-67.688
80.6992	-67.6575
80.7988	-67.5659
80.8984	-67.8101
81	-67.7185
81.0996	-67.688
81.1992	-67.688
81.2988	-67.749
81.3984	-67.688
81.5	-67.5659
81.5996	-67.7795
81.6992	-67.6575
81.7988	-67.8711
81.8984	-67.5659
82	-67.8406
82.0996	-67.688
82.1992	-67.9321
82.2988	-67.688
82.3984	-67.749
82.5	-67.5659
82.5996	-67.688
82.6992	-67.8711
82.7988	-67.8101
82.8984	-67.8406
83	-67.7795
83.0996	-67.688
83.1992	-67.749
83.2988	-67.749
83.3984	-67.7795
83.5	-67.688
83.5996	-67.8101
83.6992	-67.688
83.7988	-67.7795
83.8984	-67.6269
84	-67.749
84.0996	-67.688
84.1992	-67.688
84.2988	-67.5659
84.3984	-67.6575
84.5	-67.6269
84.5996	-67.5354
84.6992	-67.688
84.7988	-67.5964
84.8984	-67.688
85	-67.6575
85.0996	-67.6269
85.1992	-67.5659
85.2988	-67.6269
85.3984	-67.6269
85.5	-67.5964
85.5996	-67.688
85.6992	-67.6269
85.7988	-67.6269
85.8984	-67.4744
86	-67.6575
86.0996	-67.6269
86.1992	-67.6575
86.2988	-67.6269
86.3984	-67.5354
86.5	-67.5964
86.5996	-67.6575
86.6992	-67.6575
86.7988	-67.688
86.8984	-67.6575
87	-67.6269
87.0996	-67.6575
87.1992	-67.6269
87.2988	-67.5964
87.3984	-67.6269
87.5	-67.5659
87.5996	-67.6575
87.6992	-67.6269
87.7988	-67.7185
87.8984	-67.688
88	-67.688
88.0996	-67.5964
88.1992	-67.5659
88.2988	-67.5964
88.3984	-67.6269
88.5	-67.688
88.5996	-67.6269
88.6992	-67.5964
88.7988	-67.5964
88.8984	-67.688
89	-67.5659
89.0996	-67.6269
89.1992	-67.6269
89.2988	-67.5659
89.3984	-67.7185
89.5	-67.4438
89.5996	-67.688
89.6992	-67.6269
89.7988	-67.5964
89.8984	-67.5964
90	-67.6269
90.0996	-67.4438
90.1992	-67.5659
90.2988	-67.688
90.3984	-67.5659
90.5	-67.688
90.5996	-67.5659
90.6992	-67.5049
90.7988	-67.5964
90.8984	-67.4744
91	-67.5659
91.0996	-67.4438
91.1992	-67.5964
91.2988	-67.4438
91.3984	-67.8406
91.5	-67.4133
91.5996	-67.688
91.6992	-67.4744
91.7988	-67.5354
91.8984	-67.4744
92	-67.5659
92.0996	-67.5354
92.1992	-67.5354
92.2988	-67.5964
92.3984	-67.5354
92.5	-67.6269
92.5996	-67.5354
92.6992	-67.4133
92.7988	-67.5354
92.8984	-67.3523
93	-67.5964
93.0996	-67.4133
93.1992	-67.5659
93.2988	-67.4133
93.3984	-67.6575
93.5	-67.4133
93.5996	-67.5659
93.6992	-67.4744
93.7988	-67.4744
93.8984	-67.5964
94	-67.5049
94.0996	-67.5659
94.1992	-67.5964
94.2988	-67.5964
94.3984	-67.6269
94.5	-67.6575
94.5996	-67.5049
94.6992	-67.6269
94.7988	-67.6575
94.8984	-67.5659
95	-67.5964
95.0996	-67.5354
95.1992	-67.5964
95.2988	-67.6269
95.3984	-67.7185
95.5	-67.4438
95.5996	-67.7185
95.6992	-67.6269
95.7988	-67.5964
95.8984	-67.6575
96	-67.4438
96.0996	-67.6269
96.1992	-67.5659
96.2988	-67.6269
96.3984	-67.6575
96.5	-67.5659
96.5996	-67.5049
96.6992	-67.5964
96.7988	-67.6575
96.8984	-67.5354
97	-67.5964
97.0996	-67.6269
97.1992	-67.5354
97.2988	-67.5964
97.3984	-67.6575
97.5	-67.4133
97.5996	-67.688
97.6992	-67.5964
97.7988	-67.5049
97.8984	-67.688
98	-67.5049
98.0996	-67.5964
98.1992	-67.5354
98.2988	-67.5659
98.3984	-67.5049
98.5	-67.5659
98.5996	-67.5049
98.6992	-67.5659
98.7988	-67.6269
98.8984	-67.4744
99	-67.7185
99.0996	-67.4744
99.1992	-67.5659
99.2988	-67.4438
99.3984	-67.5659
99.5	-67.6269
99.5996	-67.5354
99.6992	-67.6269
99.7988	-67.5049
99.8984	-67.6269
100	-67.5354
100.1	-67.6269
100.199	-67.6269
100.299	-67.5354
100.398	-67.6269
100.5	-67.5049
100.6	-67.688
100.699	-67.5049
100.799	-67.688
100.898	-67.4438
101	-67.7185
101.1	-67.5354
101.199	-67.6269
101.299	-67.4744
101.398	-67.5354
101.5	-67.6269
101.6	-67.6575
101.699	-67.6575
101.799	-67.5354
101.898	-67.6575
102	-67.6269
102.1	-67.5964
102.199	-67.7185
102.299	-67.5354
102.398	-67.7185
102.5	-67.5354
102.6	-67.7795
102.699	-67.749
102.799	-67.7795
102.898	-67.5964
103	-67.7185
103.1	-67.4744
103.199	-67.5964
103.299	-67.5659
103.398	-67.6575
103.5	-67.5964
103.6	-67.7185
103.699	-67.5964
103.799	-67.6269
103.898	-67.5659
104	-67.5964
104.1	-67.5659
104.199	-67.5659
104.299	-67.5659
104.398	-67.5659
104.5	-67.5049
104.6	-67.4744
104.699	-67.5049
104.799	-67.5354
104.898	-67.4438
105	-67.5354
105.1	-67.4744
105.199	-67.5049
105.299	-67.5659
105.398	-67.4744
105.5	-67.6269
105.6	-67.4744
105.699	-67.5354
105.799	-67.4438
105.898	-67.5049
106	-67.5049
106.1	-67.5354
106.199	-67.6269
106.299	-67.5354
106.398	-67.5659
106.5	-67.4438
106.6	-67.5659
106.699	-67.5354
106.799	-67.5964
106.898	-67.5659
107	-67.5354
107.1	-67.5049
107.199	-67.4744
107.299	-67.6269
107.398	-67.4744
107.5	-67.6269
107.6	-67.4744
107.699	-67.6269
107.799	-67.5049
107.898	-67.4744
108	-67.6269
108.1	-67.4438
108.199	-67.6575
108.299	-67.5659
108.398	-67.5659
108.5	-67.5354
108.6	-67.5964
108.699	-67.4438
108.799	-67.5964
108.898	-67.4744
109	-67.5354
109.1	-67.5964
109.199	-67.4744
109.299	-67.6575
109.398	-67.4744
109.5	-67.5964
109.6	-67.5354
109.699	-67.5354
109.799	-67.5049
109.898	-67.4438
110	-67.6269
110.1	-67.4133
110.199	-67.688
110.299	-67.4438
110.398	-67.5049
110.5	-67.5049
110.6	-67.5964
110.699	-67.3523
110.799	-67.4438
110.898	-67.5964
111	-67.5049
111.1	-67.6575
111.199	-67.4744
111.299	-67.5049
111.398	-67.5049
111.5	-67.3218
111.6	-67.4438
111.699	-67.4133
111.799	-67.4744
111.898	-67.4133
112	-67.6269
112.1	-67.3218
112.199	-67.5354
112.299	-67.4133
112.398	-67.4438
112.5	-67.4133
112.6	-67.3828
112.699	-67.2913
112.799	-67.3828
112.898	-67.4438
113	-67.4133
113.1	-67.5354
113.199	-67.3828
113.299	-67.4438
113.398	-67.4438
113.5	-67.2913
113.6	-67.5049
113.699	-67.4438
113.799	-67.4438
113.898	-67.4438
114	-67.688
114.1	-67.4438
114.199	-67.5049
114.299	-67.5659
114.398	-67.4744
114.5	-67.5659
114.6	-67.5354
114.699	-67.5964
114.799	-67.5964
114.898	-67.5659
115	-67.5659
115.1	-67.5964
115.199	-67.5354
115.299	-67.6575
115.398	-67.5659
115.5	-67.4133
115.6	-67.5964
115.699	-67.6575
115.799	-67.7185
115.898	-67.4744
116	-67.6269
116.1	-67.3828
116.199	-67.5964
116.299	-67.5354
116.398	-67.4744
116.5	-67.688
116.6	-67.4438
116.699	-67.5964
116.799	-67.5354
116.898	-67.5659
117	-67.5659
117.1	-67.5659
117.199	-67.4133
117.299	-67.5354
117.398	-67.5659
117.5	-67.4744
117.6	-67.5964
117.699	-67.4744
117.799	-67.5049
117.898	-67.4744
118	-67.6269
118.1	-67.3828
118.199	-67.5659
118.299	-67.5964
118.398	-67.4744
118.5	-67.6575
118.6	-67.5354
118.699	-67.4438
118.799	-67.5354
118.898	-67.5659
119	-67.5049
119.1	-67.4744
119.199	-67.5049
119.299	-67.5659
119.398	-67.6269
119.5	-67.4438
119.6	-67.7185
119.699	-67.4133
119.799	-67.5049
119.898	-67.5659
120	-67.6269
120.1	-67.4744
120.199	-67.6269
120.299	-67.4744
120.398	-67.5964
120.5	-67.6269
120.6	-67.5659
120.699	-67.6269
120.799	-67.5964
120.898	-67.5964
121	-67.6269
121.1	-67.6269
121.199	-67.6269
121.299	-67.6269
121.398	-67.7185
121.5	-67.5049
121.6	-67.7795
121.699	-67.5964
121.799	-67.688
121.898	-67.5354
122	-67.5964
122.1	-67.5659
122.199	-67.6269
122.299	-67.6575
122.398	-67.6269
122.5	-67.749
122.6	-67.6575
122.699	-67.749
122.799	-67.6269
122.898	-67.6575
123	-67.6269
123.1	-67.5354
123.199	-67.6575
123.299	-67.6269
123.398	-67.688
123.5	-67.5659
123.6	-67.688
123.699	-67.5354
123.799	-67.5964
123.898	-67.5964
124	-67.5354
124.1	-67.6269
124.199	-67.5659
124.299	-67.6269
124.398	-67.5354
124.5	-67.5659
124.6	-67.5354
124.699	-67.5659
124.799	-67.5049
124.898	-67.4438
125	-67.6269
125.1	-67.4133
125.199	-67.5659
125.299	-67.5354
125.398	-67.5354
125.5	-67.5659
125.6	-67.5964
125.699	-67.4744
125.799	-67.4133
125.898	-67.4744
126	-67.5354
126.1	-67.688
126.199	-67.5964
126.299	-67.688
126.398	-67.5049
126.5	-67.5659
126.6	-67.5049
126.699	-67.5964
126.799	-67.5964
126.898	-67.5354
127	-67.7185
127.1	-67.5659
127.199	-67.6575
127.299	-67.5659
127.398	-67.6269
127.5	-67.5659
127.6	-67.5659
127.699	-67.5354
127.799	-67.5354
127.898	-67.6269
128	-67.5354
128.1	-67.6269
128.199	-67.5354
128.299	-67.6575
128.398	-67.5964
128.5	-67.5049
128.6	-67.5659
128.699	-67.5354
128.799	-67.6575
128.898	-67.6269
129	-67.5659
129.1	-67.5354
129.199	-67.6269
129.299	-67.5049
129.398	-67.6575
129.5	-67.4744
129.6	-67.5354
129.699	-67.5964
129.799	-67.5659
129.898	-67.6269
130	-67.5964
130.1	-67.5964
130.199	-67.5049
130.299	-67.5964
130.398	-67.4133
130.5	-67.5049
130.6	-67.5659
130.699	-67.5354
130.799	-67.5659
130.898	-67.4744
131	-67.5354
131.1	-67.5354
131.199	-67.5964
131.299	-67.3523
131.398	-67.5354
131.5	-67.4438
131.6	-67.3828
131.699	-67.6575
131.799	-67.4744
131.898	-67.5354
132	-67.5049
132.1	-67.4744
132.199	-67.3828
132.299	-67.5659
132.398	-67.4744
132.5	-67.5354
132.6	-67.5659
132.699	-67.3523
132.799	-67.4744
132.898	-67.4133
133	-67.5354
133.1	-67.4438
133.199	-67.4438
133.299	-67.3523
133.398	-67.4744
133.5	-67.5659
133.6	-67.4438
133.699	-67.6269
133.799	-67.4438
133.898	-67.5659
134	-67.5354
134.1	-67.4744
134.199	-67.5659
134.299	-67.5659
134.398	-67.6575
134.5	-67.5659
134.6	-67.7795
134.699	-67.5354
134.799	-67.6575
134.898	-67.6269
135	-67.5354
135.1	-67.6269
135.199	-67.6269
135.299	-67.6575
135.398	-67.5964
135.5	-67.6269
135.6	-67.6575
135.699	-67.7795
135.799	-67.5354
135.898	-67.6269
136	-67.6269
136.1	-67.5659
136.199	-67.6269
136.299	-67.5964
136.398	-67.688
136.5	-67.6575
136.6	-67.7185
136.699	-67.5964
136.799	-67.6575
136.898	-67.5964
137	-67.5659
137.1	-67.6575
137.199	-67.6269
137.299	-67.5659
137.398	-67.6269
137.5	-67.5049
137.6	-67.6269
137.699	-67.6575
137.799	-67.5049
137.898	-67.6575
138	-67.5354
138.1	-67.5049
138.199	-67.6575
138.299	-67.5354
138.398	-67.5964
138.5	-67.5354
138.6	-67.6269
138.699	-67.5354
138.799	-67.5659
138.898	-67.4133
139	-67.5354
139.1	-67.6269
139.199	-67.5049
139.299	-67.6575
139.398	-67.7185
139.5	-67.6575
139.6	-67.6269
139.699	-67.5659
139.799	-67.4744
139.898	-67.6575
140	-67.6269
140.1	-67.5964
140.199	-67.749
140.299	-67.5354
140.398	-67.6575
140.5	-67.7185
140.6	-67.6269
140.699	-67.4744
140.799	-67.7185
140.898	-67.5659
141	-67.6269
141.1	-67.7795
141.199	-67.6575
141.299	-67.6575
141.398	-67.6269
141.5	-67.688
141.6	-67.6575
141.699	-67.7185
141.799	-67.6575
141.898	-67.6269
142	-67.6269
142.1	-67.5659
142.199	-67.7185
142.299	-67.5964
142.398	-67.6269
142.5	-67.6575
142.6	-67.7185
142.699	-67.6575
142.799	-67.7795
142.898	-67.6269
143	-67.6575
143.1	-67.6575
143.199	-67.6575
143.299	-67.749
143.398	-67.6269
143.5	-67.688
143.6	-67.6269
143.699	-67.6269
143.799	-67.6269
143.898	-67.5964
144	-67.7185
144.1	-67.5049
144.199	-67.7185
144.299	-67.5354
144.398	-67.5964
144.5	-67.5659
144.6	-67.5659
144.699	-67.5964
144.799	-67.5049
144.898	-67.6269
145	-67.5354
145.1	-67.6575
145.199	-67.5964
145.299	-67.5659
145.398	-67.4744
145.5	-67.4744
145.6	-67.5964
145.699	-67.5049
145.799	-67.6269
145.898	-67.6269
146	-67.5354
146.1	-67.5354
146.199	-67.7185
146.299	-67.5354
146.398	-67.5659
146.5	-67.5049
146.6	-67.5354
146.699	-67.6575
146.799	-67.5354
146.898	-67.7185
147	-67.4744
147.1	-67.6269
147.199	-67.5964
147.299	-67.5659
147.398	-67.5964
147.5	-67.5354
147.6	-67.7185
147.699	-67.5659
147.799	-67.5659
147.898	-67.5659
148	-67.5964
148.1	-67.5964
148.199	-67.5964
148.299	-67.5049
148.398	-67.5659
148.5	-67.688
148.6	-67.5659
148.699	-67.5964
148.799	-67.5049
148.898	-67.6269
149	-67.5964
149.1	-67.5964
149.199	-67.5659
149.299	-67.5964
149.398	-67.6575
149.5	-67.5659
149.6	-67.6269
149.699	-67.6269
149.799	-67.6575
149.898	-67.5354
150	-67.5659
150.1	-67.4744
150.199	-67.5354
150.299	-67.5049
150.398	-67.5049
150.5	-67.5354
150.6	-67.5659
150.699	-67.5964
150.799	-67.5354
150.898	-67.6575
151	-67.4744
151.1	-67.5659
151.199	-67.5049
151.299	-67.5049
151.398	-67.5659
151.5	-67.4744
151.6	-67.5049
151.699	-67.5659
151.799	-67.5049
151.898	-67.3828
152	-67.4438
152.1	-67.4438
152.199	-67.4438
152.299	-67.5354
152.398	-67.5354
152.5	-67.5964
152.6	-67.5659
152.699	-67.4133
152.799	-67.3828
152.898	-67.5354
153	-67.3828
153.1	-67.5659
153.199	-67.5049
153.299	-67.5049
153.398	-67.5659
153.5	-67.5049
153.6	-67.5049
153.699	-67.5659
153.799	-67.5049
153.898	-67.5049
154	-67.5049
154.1	-67.5354
154.199	-67.5659
154.299	-67.5964
154.398	-67.5659
154.5	-67.5964
154.6	-67.5354
154.699	-67.5964
154.799	-67.5354
154.898	-67.6269
155	-67.6269
155.1	-67.5964
155.199	-67.688
155.299	-67.4438
155.398	-67.6269
155.5	-67.6269
155.6	-67.6269
155.699	-67.5964
155.799	-67.5354
155.898	-67.6269
156	-67.6575
156.1	-67.5659
156.199	-67.5354
156.299	-67.688
156.398	-67.5354
156.5	-67.6575
156.6	-67.5354
156.699	-67.5354
156.799	-67.5354
156.898	-67.5049
157	-67.6575
157.1	-67.5659
157.199	-67.6575
157.299	-67.4438
157.398	-67.5659
157.5	-67.6269
157.6	-67.5049
157.699	-67.5354
157.799	-67.5659
157.898	-67.5659
158	-67.4438
158.1	-67.5659
158.199	-67.4744
158.299	-67.688
158.398	-67.4133
158.5	-67.5659
158.6	-67.4744
158.699	-67.4744
158.799	-67.6269
158.898	-67.5049
159	-67.5659
159.1	-67.6269
159.199	-67.5659
159.299	-67.5354
159.398	-67.6269
159.5	-67.4744
159.6	-67.5354
159.699	-67.6575
159.799	-67.5049
159.898	-67.6269
160	-67.7185
160.1	-67.5354
160.199	-67.5354
160.299	-67.6575
160.398	-67.4133
160.5	-67.5354
160.6	-67.5049
160.699	-67.4744
160.799	-67.7185
160.898	-67.5659
161	-67.4744
161.1	-67.688
161.199	-67.688
161.299	-67.4133
161.398	-67.5659
161.5	-67.688
161.6	-67.5659
161.699	-67.6575
161.799	-67.5049
161.898	-67.6575
162	-67.6269
162.1	-67.5964
162.199	-67.6575
162.299	-67.6575
162.398	-67.5354
162.5	-67.6575
162.6	-67.688
162.699	-67.688
162.799	-67.7795
162.898	-67.688
163	-67.6575
163.1	-67.688
163.199	-67.5964
163.299	-67.5354
163.398	-67.6575
163.5	-67.688
163.6	-67.5964
163.699	-67.6269
163.799	-67.4744
163.898	-67.5964
164	-67.5354
164.1	-67.5659
164.199	-67.5049
164.299	-67.5964
164.398	-67.4744
164.5	-67.5354
164.6	-67.5659
164.699	-67.4438
164.799	-67.6269
164.898	-67.4438
165	-67.5354
165.1	-67.4133
165.199	-67.4133
165.299	-67.5049
165.398	-67.3828
165.5	-67.5964
165.6	-67.4438
165.699	-67.5049
165.799	-67.4438
165.898	-67.5354
166	-67.5049
166.1	-67.4744
166.199	-67.5964
166.299	-67.5049
166.398	-67.5049
166.5	-67.4744
166.6	-67.5354
166.699	-67.4438
166.799	-67.5659
166.898	-67.4133
167	-67.5354
167.1	-67.5049
167.199	-67.4744
167.299	-67.6269
167.398	-67.4133
167.5	-67.6575
167.6	-67.4744
167.699	-67.5354
167.799	-67.5964
167.898	-67.4744
168	-67.4744
168.1	-67.5049
168.199	-67.5659
168.299	-67.5659
168.398	-67.5659
168.5	-67.5354
168.6	-67.6269
168.699	-67.5049
168.799	-67.5354
168.898	-67.4744
169	-67.4438
169.1	-67.5354
169.199	-67.5049
169.299	-67.5659
169.398	-67.4744
169.5	-67.5659
169.6	-67.4438
169.699	-67.5049
169.799	-67.4744
169.898	-67.5354
170	-67.4438
170.1	-67.5659
170.199	-67.4438
170.299	-67.5049
170.398	-67.4744
170.5	-67.5964
170.6	-67.4744
170.699	-67.4744
170.799	-67.4133
170.898	-67.5354
171	-67.4438
171.1	-67.4438
171.199	-67.4744
171.299	-67.4438
171.398	-67.4744
171.5	-67.5049
171.6	-67.2607
171.699	-67.4133
171.799	-67.4133
171.898	-67.4133
172	-67.5049
172.1	-67.4438
172.199	-67.4438
172.299	-67.4438
172.398	-67.4744
172.5	-67.4744
172.6	-67.3218
172.699	-67.2913
172.799	-67.2913
172.898	-67.4438
173	-67.3828
173.1	-67.4744
173.199	-67.3523
173.299	-67.4133
173.398	-67.4133
173.5	-67.4438
173.6	-67.2913
173.699	-67.4438
173.799	-67.5049
173.898	-67.3828
174	-67.5049
174.1	-67.4744
174.199	-67.4744
174.299	-67.5354
174.398	-67.5049
174.5	-67.4438
174.6	-67.5354
174.699	-67.4744
174.799	-67.4133
174.898	-67.6575
175	-67.5049
175.1	-67.6269
175.199	-67.5354
175.299	-67.5354
175.398	-67.5049
175.5	-67.6575
175.6	-67.4744
175.699	-67.4438
175.799	-67.5964
175.898	-67.4438
176	-67.5964
176.1	-67.4133
176.199	-67.4744
176.299	-67.5354
176.398	-67.5049
176.5	-67.5354
176.6	-67.5354
176.699	-67.5049
176.799	-67.4438
176.898	-67.5049
177	-67.3523
177.1	-67.5964
177.199	-67.5354
177.299	-67.4744
177.398	-67.5354
177.5	-67.5049
177.6	-67.4744
177.699	-67.4438
177.799	-67.5964
177.898	-67.3828
178	-67.5659
178.1	-67.5049
178.199	-67.5049
178.299	-67.3828
178.398	-67.4744
178.5	-67.5659
178.6	-67.4438
178.699	-67.5354
178.799	-67.4133
178.898	-67.5354
179	-67.3523
179.1	-67.5354
179.199	-67.5049
179.299	-67.3523
179.398	-67.6575
179.5	-67.4133
179.6	-67.5049
179.699	-67.5049
179.799	-67.5354
179.898	-67.4744
180	-67.5049
180.1	-67.4744
180.199	-67.3828
180.299	-67.6575
180.398	-67.4744
180.5	-67.5659
180.6	-67.4133
180.699	-67.5659
180.799	-67.5964
180.898	-67.5964
181	-67.4438
181.1	-67.5049
181.199	-67.5354
181.299	-67.4744
181.398	-67.688
181.5	-67.5354
181.6	-67.5049
181.699	-67.6575
181.799	-67.5964
181.898	-67.6269
182	-67.5354
182.1	-67.5659
182.199	-67.5354
182.299	-67.7185
182.398	-67.4744
182.5	-67.7185
182.6	-67.6575
182.699	-67.7185
182.799	-67.688
182.898	-67.5049
183	-67.4438
183.1	-67.5964
183.199	-67.5964
183.299	-67.5659
183.398	-67.6575
183.5	-67.5659
183.6	-67.5964
183.699	-67.6269
183.799	-67.5659
183.898	-67.5659
184	-67.5659
184.1	-67.5964
184.199	-67.5659
184.299	-67.5964
184.398	-67.3828
184.5	-67.5659
184.6	-67.4133
184.699	-67.5049
184.799	-67.3828
184.898	-67.4133
185	-67.4438
185.1	-67.4438
185.199	-67.5049
185.299	-67.2913
185.398	-67.5049
185.5	-67.4744
185.6	-67.5049
185.699	-67.5354
185.799	-67.3523
185.898	-67.4133
186	-67.3828
186.1	-67.688
186.199	-67.4744
186.299	-67.5049
186.398	-67.4744
186.5	-67.4744
186.6	-67.4744
186.699	-67.5049
186.799	-67.3828
186.898	-67.4744
187	-67.4133
187.1	-67.5049
187.199	-67.4744
187.299	-67.4438
187.398	-67.5354
187.5	-67.4438
187.6	-67.5049
187.699	-67.5049
187.799	-67.4133
187.898	-67.6269
188	-67.4744
188.1	-67.5659
188.199	-67.5049
188.299	-67.5659
188.398	-67.5354
188.5	-67.5354
188.6	-67.4438
188.699	-67.5659
188.799	-67.5354
188.898	-67.4133
189	-67.6269
189.1	-67.5049
189.199	-67.5659
189.299	-67.5659
189.398	-67.4438
189.5	-67.4744
189.6	-67.4744
189.699	-67.5659
189.799	-67.4744
189.898	-67.5964
190	-67.4133
190.1	-67.5964
190.199	-67.4438
190.299	-67.5354
190.398	-67.5354
190.5	-67.3828
190.6	-67.4438
190.699	-67.5049
190.799	-67.5049
190.898	-67.4744
191	-67.4133
191.1	-67.5049
191.199	-67.5354
191.299	-67.4133
191.398	-67.3218
191.5	-67.4744
191.6	-67.3218
191.699	-67.4744
191.799	-67.3523
191.898	-67.5659
192	-67.3523
192.1	-67.4744
192.199	-67.2913
192.299	-67.4133
192.398	-67.3828
192.5	-67.3523
192.6	-67.4438
192.699	-67.3218
192.799	-67.4133
192.898	-67.4438
193	-67.5049
193.1	-67.4438
193.199	-67.4438
193.299	-67.3523
193.398	-67.3218
193.5	-67.5354
193.6	-67.3218
193.699	-67.5354
193.799	-67.4744
193.898	-67.4744
194	-67.4438
194.1	-67.5659
194.199	-67.3523
194.299	-67.5049
194.398	-67.5354
194.5	-67.4744
194.6	-67.5659
194.699	-67.5659
194.799	-67.5354
194.898	-67.5964
195	-67.5354
195.1	-67.4744
195.199	-67.5354
195.299	-67.5049
195.398	-67.5659
195.5	-67.749
195.6	-67.5049
195.699	-67.688
195.799	-67.5354
195.898	-67.5659
196	-67.5354
196.1	-67.5354
196.199	-67.3523
196.299	-67.5049
196.398	-67.6575
196.5	-67.4744
196.6	-67.6575
196.699	-67.5354
196.799	-67.4744
196.898	-67.5049
197	-67.4744
197.1	-67.5354
197.199	-67.6269
197.299	-67.4744
197.398	-67.5049
197.5	-67.5964
197.6	-67.4438
197.699	-67.688
197.799	-67.5659
197.898	-67.5354
198	-67.4744
198.1	-67.5049
198.199	-67.5354
198.299	-67.5659
198.398	-67.5659
198.5	-67.4133
198.6	-67.5964
198.699	-67.5049
198.799	-67.5659
198.898	-67.4438
199	-67.5354
199.1	-67.5354
199.199	-67.5354
199.299	-67.5049
199.398	-67.4744
199.5	-67.6269
199.6	-67.4438
199.699	-67.688
[truncated: 98,003 more rows]
