# Supplementary material for: The cation channel mechanisms of subthreshold inward depolarizing currents in the mice VTA dopaminergic neurons and their roles in the chronic-stress-induced depression-like behavior
Source: eLife. 2024 Dec 6;12:RP88319. doi: 10.7554/eLife.88319 (PMC11623934; doi:10.7554/eLife.88319)
Supplement: Figure 4—figure supplement 1—source data 1. [file elife-88319-fig4-figsupp1-data1.xlsx]

## Sheet:  A ii
ACSF	RR	ACSF
3.53	2.93	3.44
1.35	1.09	0.99
2.91	2.58	3.37
1.79	3.323	2.99
2.54	3.33	2.92
2.04	1.4	2.2
2.28	1.49	2.24
3.5	2.47	2.67
0.78	0.99	0.86

## Sheet:  B
Figure 4-figure supplement 1 B i			Figure 4-figure supplement 1 B ii
			acsf			RR
Time (min)	Firing rate (Hz)		Time (ms)	voltage (mv)		Time (ms)	voltage (mv)
0.4	1.875		0	-0.00122		0	-0.1062
0.8	2.70833		0	0.00122		0	-0.10254
1.2	2.66667		0.0625	-0.00122		0.125	-0.09705
1.6	2.70833		0.125	-0.00183		0.125	-0.09033
2	2.70833		0.1875	-0.00244		0.125	-0.08362
2.4	2.625		0.25	-0.00183		0.25	-0.07935
2.8	2.70833		0.25	-0.00183		0.25	-0.07568
3.2	2.66667		0.3125	-0.00366		0.375	-0.07568
3.6	2.625		0.375	-0.00732		0.375	-0.07751
4	2.45833		0.4375	-0.00977		0.375	-0.07996
4.4	2.54167		0.5	-0.01709		0.5	-0.08057
4.8	2.54167		0.5	-0.0177		0.5	-0.08118
5.2	2.625		0.5625	-0.02075		0.625	-0.08179
5.6	2.66667		0.625	-0.02075		0.625	-0.08057
6	2.54167		0.6875	-0.02136		0.625	-0.08179
6.4	2.45833		0.75	-0.01953		0.75	-0.07874
6.8	2.54167		0.75	-0.01709		0.75	-0.07629
7.2	2.625		0.8125	-0.01221		0.875	-0.07629
7.6	2.5		0.875	-0.00793		0.875	-0.07935
8	2.54167		0.9375	-0.00549		0.875	-0.08118
8.4	2.5		1	-0.00732		1	-0.08057
8.8	2.54167		1	-0.00854		1	-0.08057
9.2	2.625		1.0625	-0.01099		1.125	-0.08118
9.6	2.41667		1.125	-0.01526		1.125	-0.08179
10	2.5		1.1875	-0.02258		1.125	-0.08057
10.4	2.54167		1.25	-0.02808		1.25	-0.08057
10.8	2.625		1.25	-0.03479		1.25	-0.0769
11.2	2.54167		1.3125	-0.03418		1.375	-0.07507
11.6	2.75		1.375	-0.03662		1.375	-0.07019
12	2.83333		1.4375	-0.03662		1.375	-0.06592
12.4	2.91667		1.5	-0.03723		1.5	-0.06287
12.8	2.91667		1.5	-0.03601		1.5	-0.05981
13.2	3.08333		1.5625	-0.03357		1.625	-0.05737
13.6	3		1.625	-0.03174		1.625	-0.05615
14	3		1.6875	-0.02625		1.625	-0.05554
14.4	3.125		1.75	-0.0238		1.75	-0.05798
14.8	3.16667		1.75	-0.02014		1.75	-0.06165
15.2	3.08333		1.8125	-0.01892		1.875	-0.06287
15.6	3.33333		1.875	-0.01587		1.875	-0.06348
16	3.29167		1.9375	-0.01587		1.875	-0.06653
16.4	3.375		2	-0.01465		2	-0.07019
16.8	4		2	-0.01831		2	-0.07324
17.2	4.20833		2.0625	-0.02136		2.125	-0.07446
17.6	4.20833		2.125	-0.02686		2.125	-0.07507
18	4.25		2.1875	-0.03052		2.125	-0.07629
18.4	4.125		2.25	-0.03174		2.25	-0.07874
18.8	4.04167		2.25	-0.03784		2.25	-0.07874
19.2	4.08333		2.3125	-0.04272		2.375	-0.07751
19.6	4.16667		2.375	-0.04822		2.375	-0.07446
20	4.20833		2.4375	-0.04822		2.375	-0.07324
20.4	3.91667		2.5	-0.05066		2.5	-0.07263
20.8	3.91667		2.5	-0.05005		2.5	-0.07202
21.2	3.95833		2.5625	-0.05127		2.625	-0.07141
21.6	4.08333		2.625	-0.04822		2.625	-0.07202
22	4.04167		2.6875	-0.04456		2.625	-0.0708
22.4	3.83333		2.75	-0.03845		2.75	-0.0708
22.8	3.66667		2.75	-0.03235		2.75	-0.06836
23.2	3.58333		2.8125	-0.02808		2.875	-0.06775
23.6	3.58333		2.875	-0.02258		2.875	-0.06897
24	3.45833		2.9375	-0.02502		2.875	-0.06531
24.4	3.5		3	-0.02563		3	-0.0647
24.8	3.45833		3	-0.03174		3	-0.06409
25.2	3.375		3.0625	-0.03479		3.125	-0.06653
25.6	3.375		3.125	-0.03784		3.125	-0.06958
26	3.29167		3.1875	-0.04517		3.125	-0.07446
26.4	3.25		3.25	-0.04517		3.25	-0.07568
26.8	3.33333		3.25	-0.047		3.25	-0.08179
27.2	3.25		3.3125	-0.04272		3.375	-0.08423
27.6	3.33333		3.375	-0.0415		3.375	-0.08789
28	3.04167		3.4375	-0.04211		3.375	-0.08789
28.4	3.16667		3.5	-0.03967		3.5	-0.08545
28.8	3.125		3.5	-0.04028		3.5	-0.08484
29.2	3.16667		3.5625	-0.03967		3.625	-0.08484
29.6	3.16667		3.625	-0.03906		3.625	-0.08606
30	3.08333		3.6875	-0.04211		3.625	-0.0824
30.4	2.95833		3.75	-0.04333		3.75	-0.08057
30.8	2.95833		3.75	-0.04211		3.75	-0.07507
31.2	3		3.8125	-0.04272		3.875	-0.07263
31.6	3.125		3.875	-0.04395		3.875	-0.06836
32	3.125		3.9375	-0.047		3.875	-0.06653
32.4	3.08333		4	-0.04822		4	-0.06348
32.8	3.16667		4	-0.05249		4	-0.05981
33.2	3		4.0625	-0.05371		4.125	-0.05493
33.6	3.04167		4.125	-0.05737		4.125	-0.05188
34	2.91667		4.1875	-0.0592		4.125	-0.05188
34.4	2.875		4.25	-0.05493		4.25	-0.0531
34.8	2.91667		4.25	-0.05737		4.25	-0.05676
35.2	3.04167		4.3125	-0.05493		4.375	-0.05676
35.6	3.125		4.375	-0.05188		4.375	-0.0592
36	2.91667		4.4375	-0.05005		4.375	-0.05981
36.4	2.95833		4.5	-0.04639		4.5	-0.06287
36.8	2.83333		4.5	-0.04578		4.5	-0.0647
37.2	3		4.5625	-0.04517		4.625	-0.06226
37.6	2.95833		4.625	-0.04456		4.625	-0.06226
38	2.91667		4.6875	-0.04211		4.625	-0.06409
38.4	2.91667		4.75	-0.04333		4.75	-0.06348
38.8	2.95833		4.75	-0.04578		4.75	-0.06165
39.2	2.95833		4.8125	-0.04822		4.875	-0.05676
39.6	2.95833		4.875	-0.04822		4.875	-0.05432
40	2.875		4.9375	-0.04822		4.875	-0.0531
			5	-0.047		5	-0.0531
			5	-0.047		5	-0.05249
			5.0625	-0.04761		5.125	-0.05432
			5.125	-0.04517		5.125	-0.05493
			5.1875	-0.04517		5.125	-0.05615
			5.25	-0.04517		5.25	-0.05798
			5.25	-0.04456		5.25	-0.05859
			5.3125	-0.0415		5.375	-0.06104
			5.375	-0.04028		5.375	-0.06348
			5.4375	-0.03601		5.375	-0.06409
			5.5	-0.03479		5.5	-0.06409
			5.5	-0.03113		5.5	-0.07019
			5.5625	-0.02686		5.625	-0.07507
			5.625	-0.02563		5.625	-0.08179
			5.6875	-0.0238		5.625	-0.08423
			5.75	-0.02136		5.75	-0.08728
			5.75	-0.01465		5.75	-0.09155
			5.8125	-0.01221		5.875	-0.09827
			5.875	-0.00854		5.875	-0.10193
			5.9375	-0.00671		5.875	-0.10498
			6	-0.00427		6	-0.10803
			6	-0.00305		6	-0.11353
			6.0625	-0.0061		6.125	-0.11963
			6.125	-0.00366		6.125	-0.12207
			6.1875	-0.00366		6.125	-0.12329
			6.25	-0.00061		6.25	-0.12024
			6.25	0.00183		6.25	-0.11902
			6.3125	0.00366		6.375	-0.11658
			6.375	0.00793		6.375	-0.11353
			6.4375	0.00977		6.375	-0.11292
			6.5	0.0116		6.5	-0.11292
			6.5	0.01282		6.5	-0.11353
			6.5625	0.01282		6.625	-0.11414
			6.625	0.01343		6.625	-0.1178
			6.6875	0.01465		6.625	-0.12329
			6.75	0.01526		6.75	-0.12878
			6.75	0.01465		6.75	-0.13245
			6.8125	0.01709		6.875	-0.13123
			6.875	0.01648		6.875	-0.13428
			6.9375	0.01892		6.875	-0.13428
			7	0.02075		7	-0.13489
			7	0.02258		7	-0.13
			7.0625	0.02747		7.125	-0.12695
			7.125	0.0293		7.125	-0.12573
			7.1875	0.03174		7.125	-0.12756
			7.25	0.03296		7.25	-0.12817
			7.25	0.03235		7.25	-0.13
			7.3125	0.03235		7.375	-0.13123
			7.375	0.03235		7.375	-0.13367
			7.4375	0.02991		7.375	-0.1355
			7.5	0.02563		7.5	-0.13428
			7.5	0.02014		7.5	-0.13123
			7.5625	0.01526		7.625	-0.12756
			7.625	0.00793		7.625	-0.12085
			7.6875	0		7.625	-0.11597
			7.75	-0.00732		7.75	-0.1123
			7.75	-0.01282		7.75	-0.11169
			7.8125	-0.02014		7.875	-0.10681
			7.875	-0.02563		7.875	-0.10376
			7.9375	-0.03113		7.875	-0.09888
			8	-0.03479		8	-0.09766
			8	-0.03662		8	-0.09583
			8.0625	-0.03967		8.125	-0.09583
			8.125	-0.04089		8.125	-0.09338
			8.1875	-0.04089		8.125	-0.08911
			8.25	-0.03906		8.25	-0.08667
			8.25	-0.03723		8.25	-0.08545
			8.3125	-0.03601		8.375	-0.08057
			8.375	-0.03723		8.375	-0.07019
			8.4375	-0.03723		8.375	-0.06104
			8.5	-0.03479		8.5	-0.04944
			8.5	-0.03418		8.5	-0.04089
			8.5625	-0.0354		8.625	-0.03052
			8.625	-0.03601		8.625	-0.02502
			8.6875	-0.03723		8.625	-0.01831
			8.75	-0.0415		8.75	-0.01282
			8.75	-0.047		8.75	-0.01221
			8.8125	-0.05737		8.875	-0.01404
			8.875	-0.06348		8.875	-0.0177
			8.9375	-0.06836		8.875	-0.02075
			9	-0.07446		9	-0.02197
			9	-0.07874		9	-0.02197
			9.0625	-0.08179		9.125	-0.02258
			9.125	-0.08118		9.125	-0.02075
			9.1875	-0.07935		9.125	-0.0177
			9.25	-0.07874		9.25	-0.01343
			9.25	-0.07935		9.25	-0.01038
			9.3125	-0.07874		9.375	-0.01038
			9.375	-0.07751		9.375	-0.00977
			9.4375	-0.07568		9.375	-0.01038
			9.5	-0.07874		9.5	-0.00916
			9.5	-0.07935		9.5	-0.00671
			9.5625	-0.07996		9.625	-0.00305
			9.625	-0.08179		9.625	0.00244
			9.6875	-0.08362		9.625	0.00732
			9.75	-0.08728		9.75	0.01282
			9.75	-0.09033		9.75	0.01709
			9.8125	-0.09399		9.875	0.02014
			9.875	-0.09705		9.875	0.02075
			9.9375	-0.10132		9.875	0.01526
			10	-0.10254		10	0.01038
			10	-0.10193		10	0.0061
			10.0625	-0.10254		10.125	0.00183
			10.125	-0.10315		10.125	-0.00244
			10.1875	-0.10376		10.125	-0.0061
			10.25	-0.10437		10.25	-0.0116
			10.25	-0.10193		10.25	-0.01343
			10.3125	-0.10315		10.375	-0.01343
			10.375	-0.1062		10.375	-0.00854
			10.4375	-0.10864		10.375	-0.00366
			10.5	-0.11108		10.5	-0.00122
			10.5	-0.11169		10.5	0.00366
			10.5625	-0.11169		10.625	0.00793
			10.625	-0.11292		10.625	0.01282
			10.6875	-0.10925		10.625	0.01465
			10.75	-0.10376		10.75	0.01404
			10.75	-0.10193		10.75	0.01282
			10.8125	-0.09827		10.875	0.01404
			10.875	-0.09399		10.875	0.0116
			10.9375	-0.09094		10.875	0.01282
			11	-0.08911		11	0.00793
			11	-0.09094		11	0.00427
			11.0625	-0.08972		11.125	0.00122
			11.125	-0.08911		11.125	-0.00244
			11.1875	-0.0885		11.125	-0.00549
			11.25	-0.08728		11.25	-0.00671
			11.25	-0.0885		11.25	-0.0061
			11.3125	-0.08728		11.375	-0.0061
			11.375	-0.08728		11.375	-0.00793
			11.4375	-0.08728		11.375	-0.00793
			11.5	-0.0885		11.5	-0.00793
			11.5	-0.0885		11.5	-0.00793
			11.5625	-0.0885		11.625	-0.00977
			11.625	-0.08423		11.625	-0.01282
			11.6875	-0.08118		11.625	-0.01465
			11.75	-0.07629		11.75	-0.01343
			11.75	-0.07019		11.75	-0.01587
			11.8125	-0.0647		11.875	-0.01648
			11.875	-0.06287		11.875	-0.02014
			11.9375	-0.06226		11.875	-0.02136
			12	-0.06042		12	-0.02258
			12	-0.06226		12	-0.02563
			12.0625	-0.06104		12.125	-0.02869
			12.125	-0.06226		12.125	-0.03296
			12.1875	-0.06042		12.125	-0.03235
			12.25	-0.05676		12.25	-0.03235
			12.25	-0.0531		12.25	-0.03296
			12.3125	-0.05127		12.375	-0.03357
			12.375	-0.05066		12.375	-0.03662
			12.4375	-0.04944		12.375	-0.03906
			12.5	-0.04639		12.5	-0.04395
			12.5	-0.04517		12.5	-0.04639
			12.5625	-0.04761		12.625	-0.04761
			12.625	-0.04883		12.625	-0.04578
			12.6875	-0.05371		12.625	-0.04883
			12.75	-0.05432		12.75	-0.04822
			12.75	-0.05859		12.75	-0.05005
			12.8125	-0.06348		12.875	-0.05127
			12.875	-0.06592		12.875	-0.05005
			12.9375	-0.06836		12.875	-0.05371
			13	-0.06714		13	-0.05615
			13	-0.06348		13	-0.05859
			13.0625	-0.05981		13.125	-0.05432
			13.125	-0.05798		13.125	-0.05249
			13.1875	-0.05432		13.125	-0.05188
			13.25	-0.05432		13.25	-0.05127
			13.25	-0.05188		13.25	-0.05188
			13.3125	-0.0531		13.375	-0.04944
			13.375	-0.05188		13.375	-0.04944
			13.4375	-0.0531		13.375	-0.04944
			13.5	-0.05554		13.5	-0.04883
			13.5	-0.05798		13.5	-0.047
			13.5625	-0.06042		13.625	-0.04639
			13.625	-0.05615		13.625	-0.04578
			13.6875	-0.05615		13.625	-0.04211
			13.75	-0.05432		13.75	-0.03662
			13.75	-0.05249		13.75	-0.03418
			13.8125	-0.04822		13.875	-0.02991
			13.875	-0.04395		13.875	-0.02686
			13.9375	-0.03906		13.875	-0.02625
			14	-0.03784		14	-0.02258
			14	-0.03357		14	-0.02808
			14.0625	-0.03052		14.125	-0.03113
			14.125	-0.02747		14.125	-0.03723
			14.1875	-0.02563		14.125	-0.03967
			14.25	-0.02686		14.25	-0.0415
			14.25	-0.02686		14.25	-0.04395
			14.3125	-0.02991		14.375	-0.04456
			14.375	-0.03174		14.375	-0.04395
			14.4375	-0.03418		14.375	-0.03784
			14.5	-0.03601		14.5	-0.03601
			14.5	-0.03662		14.5	-0.03418
			14.5625	-0.03967		14.625	-0.03296
			14.625	-0.04211		14.625	-0.03296
			14.6875	-0.04211		14.625	-0.03296
			14.75	-0.04272		14.75	-0.03418
			14.75	-0.04395		14.75	-0.0354
			14.8125	-0.04761		14.875	-0.03601
			14.875	-0.04944		14.875	-0.0354
			14.9375	-0.05249		14.875	-0.03601
			15	-0.0531		15	-0.03418
			15	-0.05676		15	-0.03174
			15.0625	-0.06226		15.125	-0.02747
			15.125	-0.06592		15.125	-0.0238
			15.1875	-0.06897		15.125	-0.02014
			15.25	-0.06836		15.25	-0.01709
			15.25	-0.06653		15.25	-0.00977
			15.3125	-0.06653		15.375	-0.00183
			15.375	-0.06531		15.375	0.00305
			15.4375	-0.05859		15.375	0.00427
			15.5	-0.05737		15.5	0.00244
			15.5	-0.05371		15.5	0.00244
			15.5625	-0.05676		15.625	-0.00305
			15.625	-0.05676		15.625	-0.00366
			15.6875	-0.06287		15.625	-0.00793
			15.75	-0.06775		15.75	-0.01038
			15.75	-0.0708		15.75	-0.0061
			15.8125	-0.07446		15.875	-0.00244
			15.875	-0.07996		15.875	0.00305
			15.9375	-0.08545		15.875	0.00671
			16	-0.09155		16	0.01099
			16	-0.09644		16	0.01404
			16.0625	-0.09766		16.125	0.01648
			16.125	-0.10132		16.125	0.0177
			16.1875	-0.10376		16.125	0.01953
			16.25	-0.10681		16.25	0.02258
			16.25	-0.10986		16.25	0.02258
			16.3125	-0.10925		16.375	0.02502
			16.375	-0.10986		16.375	0.02869
			16.4375	-0.1123		16.375	0.03296
			16.5	-0.11414		16.5	0.0354
			16.5	-0.11414		16.5	0.03357
			16.5625	-0.11475		16.625	0.03357
			16.625	-0.11536		16.625	0.03235
			16.6875	-0.11597		16.625	0.03235
			16.75	-0.1178		16.75	0.03418
			16.75	-0.11658		16.75	0.03418
			16.8125	-0.11902		16.875	0.0354
			16.875	-0.11902		16.875	0.03906
			16.9375	-0.12207		16.875	0.0415
			17	-0.12207		17	0.0415
			17	-0.12695		17	0.04272
			17.0625	-0.12756		17.125	0.04089
			17.125	-0.12817		17.125	0.03967
			17.1875	-0.1239		17.125	0.04089
			17.25	-0.12024		17.25	0.03784
			17.25	-0.11902		17.25	0.03906
			17.3125	-0.11658		17.375	0.03784
			17.375	-0.1123		17.375	0.03723
			17.4375	-0.10681		17.375	0.03601
			17.5	-0.10254		17.5	0.03601
			17.5	-0.1001		17.5	0.03601
			17.5625	-0.09827		17.625	0.03662
			17.625	-0.09766		17.625	0.03601
			17.6875	-0.09583		17.625	0.0354
			17.75	-0.09277		17.75	0.03479
			17.75	-0.08911		17.75	0.03479
			17.8125	-0.08789		17.875	0.03601
			17.875	-0.08301		17.875	0.03418
			17.9375	-0.07996		17.875	0.03113
			18	-0.07568		18	0.0293
			18	-0.07263		18	0.02747
			18.0625	-0.0708		18.125	0.02441
			18.125	-0.07141		18.125	0.02075
			18.1875	-0.0708		18.125	0.01648
			18.25	-0.07141		18.25	0.01221
			18.25	-0.06897		18.25	0.00793
			18.3125	-0.06531		18.375	0.00061
			18.375	-0.06775		18.375	-0.00122
			18.4375	-0.06775		18.375	-0.0061
			18.5	-0.06958		18.5	-0.00854
			18.5	-0.06714		18.5	-0.01038
			18.5625	-0.06653		18.625	-0.01465
			18.625	-0.06653		18.625	-0.01831
			18.6875	-0.06531		18.625	-0.02075
			18.75	-0.06165		18.75	-0.02625
			18.75	-0.05615		18.75	-0.0354
			18.8125	-0.04944		18.875	-0.04395
			18.875	-0.047		18.875	-0.0531
			18.9375	-0.04272		18.875	-0.06042
			19	-0.04028		19	-0.06836
			19	-0.03479		19	-0.07324
			19.0625	-0.03174		19.125	-0.07935
			19.125	-0.02747		19.125	-0.07996
			19.1875	-0.02258		19.125	-0.0824
			19.25	-0.01648		19.25	-0.08484
			19.25	-0.01282		19.25	-0.08484
			19.3125	-0.00732		19.375	-0.08545
			19.375	-0.00183		19.375	-0.08179
			19.4375	0.00488		19.375	-0.08118
			19.5	0.00732		19.5	-0.07935
			19.5	0.00916		19.5	-0.07874
			19.5625	0.01038		19.625	-0.07813
			19.625	0.01282		19.625	-0.08118
			19.6875	0.01709		19.625	-0.08545
			19.75	0.01587		19.75	-0.08972
			19.75	0.00916		19.75	-0.09277
			19.8125	0.0061		19.875	-0.09583
			19.875	0.00244		19.875	-0.09827
			19.9375	0.00305		19.875	-0.09827
			20	0.00122		20	-0.1001
			20	-0.00305		20	-0.09583
			20.0625	-0.00488		20.125	-0.09583
			20.125	-0.00183		20.125	-0.09338
			20.1875	-0.00183		20.125	-0.09338
			20.25	0.00061		20.25	-0.09155
			20.25	-0.00244		20.25	-0.09155
			20.3125	-0.00244		20.375	-0.08911
			20.375	-0.00427		20.375	-0.08911
			20.4375	-0.00732		20.375	-0.08545
			20.5	-0.00793		20.5	-0.08118
			20.5	-0.00977		20.5	-0.07996
			20.5625	-0.01038		20.625	-0.07507
			20.625	-0.0116		20.625	-0.07446
			20.6875	-0.01282		20.625	-0.06836
			20.75	-0.00916		20.75	-0.06653
			20.75	-0.00488		20.75	-0.06653
			20.8125	-0.00244		20.875	-0.06592
			20.875	-0.00061		20.875	-0.06836
			20.9375	-0.00305		20.875	-0.06897
			21	-0.00122		21	-0.07385
			21	0.00061		21	-0.07813
			21.0625	0		21.125	-0.08118
			21.125	-0.00122		21.125	-0.08179
			21.1875	-0.00305		21.125	-0.08362
			21.25	-0.00305		21.25	-0.0824
			21.25	-0.00366		21.25	-0.08118
			21.3125	-0.0061		21.375	-0.07874
			21.375	-0.00854		21.375	-0.07568
			21.4375	-0.01282		21.375	-0.07446
			21.5	-0.01282		21.5	-0.07324
			21.5	-0.01587		21.5	-0.0769
			21.5625	-0.01831		21.625	-0.07507
			21.625	-0.02197		21.625	-0.07874
			21.6875	-0.02502		21.625	-0.07629
			21.75	-0.03113		21.75	-0.07446
			21.75	-0.03479		21.75	-0.07202
			21.8125	-0.03845		21.875	-0.06897
			21.875	-0.03906		21.875	-0.06958
			21.9375	-0.03906		21.875	-0.07202
			22	-0.0415		22	-0.07446
			22	-0.04211		22	-0.07446
			22.0625	-0.04272		22.125	-0.07751
			22.125	-0.04089		22.125	-0.07568
			22.1875	-0.04089		22.125	-0.07629
			22.25	-0.04517		22.25	-0.0708
			22.25	-0.04639		22.25	-0.06714
			22.3125	-0.04822		22.375	-0.06348
			22.375	-0.04944		22.375	-0.06042
			22.4375	-0.04883		22.375	-0.05798
			22.5	-0.04944		22.5	-0.05249
			22.5	-0.05127		22.5	-0.05005
			22.5625	-0.04761		22.625	-0.04639
			22.625	-0.047		22.625	-0.047
			22.6875	-0.03967		22.625	-0.04639
			22.75	-0.03479		22.75	-0.05005
			22.75	-0.03052		22.75	-0.05127
			22.8125	-0.02747		22.875	-0.05615
			22.875	-0.02625		22.875	-0.0592
			22.9375	-0.0238		22.875	-0.06165
			23	-0.02441		23	-0.06714
			23	-0.0238		23	-0.06958
			23.0625	-0.0293		23.125	-0.07141
			23.125	-0.03296		23.125	-0.06775
			23.1875	-0.03479		23.125	-0.06592
			23.25	-0.03723		23.25	-0.06348
			23.25	-0.03662		23.25	-0.06165
			23.3125	-0.03906		23.375	-0.05737
			23.375	-0.04272		23.375	-0.05188
			23.4375	-0.04333		23.375	-0.04822
			23.5	-0.04639		23.5	-0.04761
			23.5	-0.04517		23.5	-0.04639
			23.5625	-0.04639		23.625	-0.04883
			23.625	-0.04761		23.625	-0.04822
			23.6875	-0.04639		23.625	-0.04944
			23.75	-0.04517		23.75	-0.05188
			23.75	-0.04272		23.75	-0.05066
			23.8125	-0.03967		23.875	-0.05066
			23.875	-0.03906		23.875	-0.04822
			23.9375	-0.03479		23.875	-0.04944
			24	-0.03723		24	-0.047
			24	-0.03662		24	-0.04639
			24.0625	-0.03723		24.125	-0.04578
			24.125	-0.03845		24.125	-0.04761
			24.1875	-0.0415		24.125	-0.04761
			24.25	-0.04395		24.25	-0.05066
			24.25	-0.04333		24.25	-0.04822
			24.3125	-0.04456		24.375	-0.05005
			24.375	-0.04333		24.375	-0.047
			24.4375	-0.04517		24.375	-0.04517
			24.5	-0.04883		24.5	-0.0415
			24.5	-0.047		24.5	-0.04089
			24.5625	-0.04578		24.625	-0.04456
			24.625	-0.04333		24.625	-0.04944
			24.6875	-0.0415		24.625	-0.05615
			24.75	-0.0415		24.75	-0.05981
			24.75	-0.04089		24.75	-0.06653
			24.8125	-0.03845		24.875	-0.07141
			24.875	-0.03784		24.875	-0.07751
			24.9375	-0.0354		24.875	-0.07935
			25	-0.0354		25	-0.08118
			25	-0.03174		25	-0.07935
			25.0625	-0.02869		25.125	-0.07996
			25.125	-0.02686		25.125	-0.07874
			25.1875	-0.02319		25.125	-0.07874
			25.25	-0.01831		25.25	-0.0824
			25.25	-0.01648		25.25	-0.08545
			25.3125	-0.01587		25.375	-0.0885
			25.375	-0.01465		25.375	-0.09155
			25.4375	-0.01831		25.375	-0.09827
			25.5	-0.01831		25.5	-0.10315
			25.5	-0.0238		25.5	-0.10681
			25.5625	-0.02747		25.625	-0.10864
			25.625	-0.02869		25.625	-0.10925
			25.6875	-0.0293		25.625	-0.1123
			25.75	-0.02563		25.75	-0.11475
			25.75	-0.02502		25.75	-0.11658
			25.8125	-0.02502		25.875	-0.11597
			25.875	-0.02319		25.875	-0.1178
			25.9375	-0.01892		25.875	-0.11841
			26	-0.01282		26	-0.11841
			26	-0.00732		26	-0.11902
			26.0625	0		26.125	-0.11719
			26.125	0.00732		26.125	-0.11536
			26.1875	0.01526		26.125	-0.11353
			26.25	0.02197		26.25	-0.11475
			26.25	0.02502		26.25	-0.11353
			26.3125	0.02686		26.375	-0.11353
			26.375	0.02808		26.375	-0.10986
			26.4375	0.02563		26.375	-0.10803
			26.5	0.0238		26.5	-0.10864
			26.5	0.01892		26.5	-0.11108
			26.5625	0.01648		26.625	-0.11353
			26.625	0.0116		26.625	-0.11536
			26.6875	0.00732		26.625	-0.11536
			26.75	0.00427		26.75	-0.11597
			26.75	0.00366		26.75	-0.11841
			26.8125	0.00671		26.875	-0.11902
			26.875	0.00854		26.875	-0.11902
			26.9375	0.01038		26.875	-0.11475
			27	0.01221		27	-0.10925
			27	0.01648		27	-0.1062
			27.0625	0.01953		27.125	-0.10254
			27.125	0.02258		27.125	-0.09949
			27.1875	0.0238		27.125	-0.09827
			27.25	0.02319		27.25	-0.09644
			27.25	0.02686		27.25	-0.09766
			27.3125	0.0238		27.375	-0.1001
			27.375	0.02075		27.375	-0.10498
			27.4375	0.01465		27.375	-0.10681
			27.5	0.00916		27.5	-0.10803
			27.5	0.00305		27.5	-0.10925
			27.5625	-0.00427		27.625	-0.1123
			27.625	-0.0116		27.625	-0.11108
			27.6875	-0.0177		27.625	-0.1123
			27.75	-0.02014		27.75	-0.10925
			27.75	-0.02808		27.75	-0.10742
			27.8125	-0.03113		27.875	-0.10254
			27.875	-0.0354		27.875	-0.10071
			27.9375	-0.0354		27.875	-0.09888
			28	-0.0354		28	-0.09888
			28	-0.03662		28	-0.09644
			28.0625	-0.03723		28.125	-0.09399
			28.125	-0.03967		28.125	-0.09338
			28.1875	-0.03967		28.125	-0.09094
			28.25	-0.04272		28.25	-0.08728
			28.25	-0.04639		28.25	-0.08118
			28.3125	-0.04883		28.375	-0.07202
			28.375	-0.04883		28.375	-0.06836
			28.4375	-0.04883		28.375	-0.06348
			28.5	-0.04944		28.5	-0.06104
			28.5	-0.04944		28.5	-0.0531
			28.5625	-0.05249		28.625	-0.05005
			28.625	-0.05249		28.625	-0.04578
			28.6875	-0.05737		28.625	-0.04456
			28.75	-0.06165		28.75	-0.04211
			28.75	-0.06775		28.75	-0.04089
			28.8125	-0.0708		28.875	-0.03906
			28.875	-0.07385		28.875	-0.03479
			28.9375	-0.07568		28.875	-0.03052
			29	-0.0769		29	-0.02686
			29	-0.07935		29	-0.02502
			29.0625	-0.07568		29.125	-0.02441
			29.125	-0.07935		29.125	-0.02136
			29.1875	-0.0824		29.125	-0.01831
			29.25	-0.0885		29.25	-0.0177
			29.25	-0.09521		29.25	-0.01831
			29.3125	-0.10254		29.375	-0.01709
			29.375	-0.10986		29.375	-0.01587
			29.4375	-0.11536		29.375	-0.00732
			29.5	-0.11963		29.5	-0.00488
			29.5	-0.11841		29.5	-0.00183
			29.5625	-0.12085		29.625	-0.00122
			29.625	-0.11719		29.625	0.00244
			29.6875	-0.11658		29.625	0.00488
			29.75	-0.10986		29.75	0.00854
			29.75	-0.10437		29.75	0.00854
			29.8125	-0.09827		29.875	0.01038
			29.875	-0.08911		29.875	0.0116
			29.9375	-0.07996		29.875	0.01282
			30	-0.06958		30	0.01343
			30	-0.0647		30	0.0116
			30.0625	-0.06042		30.125	0.01038
			30.125	-0.05798		30.125	0.00854
			30.1875	-0.05554		30.125	0.00671
			30.25	-0.05615		30.25	0.0061
			30.25	-0.05859		30.25	0.00488
			30.3125	-0.06287		30.375	0.00549
			30.375	-0.06775		30.375	0.00244
			30.4375	-0.06836		30.375	0.00061
			30.5	-0.07263		30.5	-0.00244
			30.5	-0.07568		30.5	-0.00061
			30.5625	-0.07935		30.625	-0.00183
			30.625	-0.07996		30.625	-0.00183
			30.6875	-0.08423		30.625	-0.00122
			30.75	-0.08728		30.75	0.00366
			30.75	-0.08972		30.75	0.00366
			30.8125	-0.0946		30.875	0.0061
			30.875	-0.09521		30.875	0.00183
			30.9375	-0.10071		30.875	-0.00305
			31	-0.10498		31	-0.00671
			31	-0.10681		31	-0.01221
			31.0625	-0.10803		31.125	-0.01465
			31.125	-0.1062		31.125	-0.0177
			31.1875	-0.10376		31.125	-0.02014
			31.25	-0.1001		31.25	-0.02014
			31.25	-0.09399		31.25	-0.01892
			31.3125	-0.08606		31.375	-0.01831
			31.375	-0.08362		31.375	-0.01526
			31.4375	-0.07874		31.375	-0.01282
			31.5	-0.07874		31.5	-0.01282
			31.5	-0.07507		31.5	-0.01648
			31.5625	-0.07507		31.625	-0.01953
			31.625	-0.07568		31.625	-0.02075
			31.6875	-0.07324		31.625	-0.02319
			31.75	-0.07385		31.75	-0.02747
			31.75	-0.07324		31.75	-0.03052
			31.8125	-0.07263		31.875	-0.03479
			31.875	-0.07019		31.875	-0.03296
			31.9375	-0.0708		31.875	-0.03662
			32	-0.06958		32	-0.03845
			32	-0.07141		32	-0.04272
			32.0625	-0.07019		32.125	-0.04395
			32.125	-0.07019		32.125	-0.04456
			32.1875	-0.06897		32.125	-0.04211
			32.25	-0.06714		32.25	-0.04395
			32.25	-0.06531		32.25	-0.04639
			32.3125	-0.06226		32.375	-0.04639
			32.375	-0.06104		32.375	-0.04883
			32.4375	-0.05676		32.375	-0.05066
			32.5	-0.0592		32.5	-0.05188
			32.5	-0.06104		32.5	-0.05249
			32.5625	-0.0647		32.625	-0.05432
			32.625	-0.06531		32.625	-0.05432
			32.6875	-0.06409		32.625	-0.05554
			32.75	-0.06226		32.75	-0.0531
			32.75	-0.06042		32.75	-0.05066
			32.8125	-0.05676		32.875	-0.05188
			32.875	-0.0531		32.875	-0.05249
			32.9375	-0.05188		32.875	-0.05066
			33	-0.05005		33	-0.04822
			33	-0.05188		33	-0.047
			33.0625	-0.05005		33.125	-0.04639
			33.125	-0.05066		33.125	-0.04944
			33.1875	-0.04822		33.125	-0.05005
			33.25	-0.04578		33.25	-0.04883
			33.25	-0.0415		33.25	-0.047
			33.3125	-0.0354		33.375	-0.04517
			33.375	-0.03479		33.375	-0.04456
			33.4375	-0.03418		33.375	-0.03845
			33.5	-0.0354		33.5	-0.03357
			33.5	-0.03723		33.5	-0.02686
			33.5625	-0.04089		33.625	-0.02014
			33.625	-0.04456		33.625	-0.01831
			33.6875	-0.05005		33.625	-0.01343
			33.75	-0.05066		33.75	-0.01648
			33.75	-0.05249		33.75	-0.01709
			33.8125	-0.05371		33.875	-0.01953
			33.875	-0.05676		33.875	-0.0238
			33.9375	-0.0592		33.875	-0.02502
			34	-0.05798		34	-0.02502
			34	-0.05798		34	-0.0238
			34.0625	-0.05615		34.125	-0.01953
			34.125	-0.05554		34.125	-0.01526
			34.1875	-0.05493		34.125	-0.01587
			34.25	-0.0531		34.25	-0.01953
			34.25	-0.05432		34.25	-0.0238
			34.3125	-0.05554		34.375	-0.02686
			34.375	-0.05615		34.375	-0.03052
			34.4375	-0.05798		34.375	-0.03357
			34.5	-0.05859		34.5	-0.03967
			34.5	-0.06104		34.5	-0.04333
			34.5625	-0.0592		34.625	-0.03967
			34.625	-0.05737		34.625	-0.03906
			34.6875	-0.05188		34.625	-0.03296
			34.75	-0.05005		34.75	-0.02991
			34.75	-0.04822		34.75	-0.02502
			34.8125	-0.047		34.875	-0.01953
			34.875	-0.04333		34.875	-0.01709
			34.9375	-0.04028		34.875	-0.01343
			35	-0.03906		35	-0.01465
			35	-0.03906		35	-0.01526
			35.0625	-0.03967		35.125	-0.0177
			35.125	-0.03662		35.125	-0.02014
			35.1875	-0.03662		35.125	-0.02014
			35.25	-0.03601		35.25	-0.01831
			35.25	-0.03967		35.25	-0.01709
			35.3125	-0.04272		35.375	-0.01587
			35.375	-0.04883		35.375	-0.01404
			35.4375	-0.05249		35.375	-0.00916
			35.5	-0.05737		35.5	-0.00244
			35.5	-0.06226		35.5	0.00122
			35.5625	-0.06409		35.625	0.0061
			35.625	-0.06714		35.625	0.00916
			35.6875	-0.07141		35.625	0.01404
			35.75	-0.07446		35.75	0.01465
			35.75	-0.07568		35.75	0.0177
			35.8125	-0.08118		35.875	0.0177
			35.875	-0.08423		35.875	0.0177
			35.9375	-0.08972		35.875	0.01892
			36	-0.09033		36	0.01892
			36	-0.09094		36	0.01831
			36.0625	-0.0946		36.125	0.01648
			36.125	-0.09705		36.125	0.0177
			36.1875	-0.1001		36.125	0.01587
			36.25	-0.10071		36.25	0.01709
			36.25	-0.10132		36.25	0.01892
			36.3125	-0.10498		36.375	0.02014
			36.375	-0.10925		36.375	0.02319
			36.4375	-0.11536		36.375	0.02319
			36.5	-0.1178		36.5	0.02563
			36.5	-0.12024		36.5	0.02686
			36.5625	-0.12024		36.625	0.03174
			36.625	-0.12329		36.625	0.0354
			36.6875	-0.11841		36.625	0.03662
			36.75	-0.1178		36.75	0.03906
			36.75	-0.11597		36.75	0.04089
			36.8125	-0.11536		36.875	0.04272
			36.875	-0.11353		36.875	0.04211
			36.9375	-0.11414		36.875	0.03967
			37	-0.11414		37	0.03784
			37	-0.11475		37	0.03601
			37.0625	-0.11108		37.125	0.03479
			37.125	-0.1062		37.125	0.03296
			37.1875	-0.1062		37.125	0.03418
			37.25	-0.10559		37.25	0.03479
			37.25	-0.1062		37.25	0.03662
			37.3125	-0.10315		37.375	0.03784
			37.375	-0.1001		37.375	0.03479
			37.4375	-0.09827		37.375	0.03418
			37.5	-0.1001		37.5	0.03174
			37.5	-0.10193		37.5	0.02625
			37.5625	-0.1001		37.625	0.01953
			37.625	-0.09827		37.625	0.01465
			37.6875	-0.10071		37.625	0.01282
			37.75	-0.10193		37.75	0.00916
			37.75	-0.10315		37.75	0.0061
			37.8125	-0.09888		37.875	0.00183
			37.875	-0.09705		37.875	0
			37.9375	-0.09155		37.875	-0.00122
			38	-0.08789		38	-0.00366
			38	-0.08423		38	-0.00854
			38.0625	-0.08545		38.125	-0.01099
			38.125	-0.08545		38.125	-0.01221
			38.1875	-0.08606		38.125	-0.01343
			38.25	-0.08423		38.25	-0.01648
			38.25	-0.08545		38.25	-0.02075
			38.3125	-0.08362		38.375	-0.02258
			38.375	-0.0824		38.375	-0.02319
			38.4375	-0.07935		38.375	-0.02441
			38.5	-0.07202		38.5	-0.02808
			38.5	-0.06897		38.5	-0.03113
			38.5625	-0.06714		38.625	-0.03479
			38.625	-0.0647		38.625	-0.0415
			38.6875	-0.06104		38.625	-0.04517
			38.75	-0.0531		38.75	-0.05066
			38.75	-0.04761		38.75	-0.05554
			38.8125	-0.04395		38.875	-0.0592
			38.875	-0.04089		38.875	-0.06409
			38.9375	-0.03601		38.875	-0.06897
			39	-0.03418		39	-0.07202
			39	-0.03174		39	-0.07507
			39.0625	-0.03174		39.125	-0.07507
			39.125	-0.02869		39.125	-0.07568
			39.1875	-0.02991		39.125	-0.07385
			39.25	-0.02563		39.25	-0.06958
			39.25	-0.02197		39.25	-0.0647
			39.3125	-0.01892		39.375	-0.05981
			39.375	-0.01404		39.375	-0.05981
			39.4375	-0.01282		39.375	-0.06226
			39.5	-0.00916		39.5	-0.06531
			39.5	-0.00671		39.5	-0.07141
			39.5625	-0.00305		39.625	-0.07629
			39.625	-0.00366		39.625	-0.08118
			39.6875	-0.00427		39.625	-0.08362
			39.75	-0.00549		39.75	-0.08545
			39.75	-0.0061		39.75	-0.08545
			39.8125	-0.00671		39.875	-0.08667
			39.875	-0.00549		39.875	-0.08667
			39.9375	-0.00671		39.875	-0.08362
			40	-0.0061		40	-0.07935
			40	-0.00427		40	-0.07751
			40.0625	-0.00305		40.125	-0.0769
			40.125	0.00061		40.125	-0.07385
			40.1875	0.00122		40.125	-0.07385
			40.25	-0.00122		40.25	-0.07507
			40.25	-0.00488		40.25	-0.07874
			40.3125	-0.00916		40.375	-0.08179
			40.375	-0.01221		40.375	-0.08179
			40.4375	-0.01282		40.375	-0.08667
			40.5	-0.01587		40.5	-0.0885
			40.5	-0.01648		40.5	-0.09338
			40.5625	-0.01709		40.625	-0.0946
			40.625	-0.01709		40.625	-0.09583
			40.6875	-0.01404		40.625	-0.09827
			40.75	-0.01343		40.75	-0.09949
			40.75	-0.0177		40.75	-0.10071
			40.8125	-0.02014		40.875	-0.10071
			40.875	-0.0238		40.875	-0.10132
			40.9375	-0.0238		40.875	-0.10193
			41	-0.02625		41	-0.10376
			41	-0.02747		41	-0.10132
			41.0625	-0.03174		41.125	-0.10132
			41.125	-0.03235		41.125	-0.1001
			41.1875	-0.03357		41.125	-0.09766
			41.25	-0.03357		41.25	-0.09705
			41.25	-0.03601		41.25	-0.09155
			41.3125	-0.03784		41.375	-0.09094
			41.375	-0.03967		41.375	-0.08911
			41.4375	-0.0415		41.375	-0.0885
			41.5	-0.04395		41.5	-0.08789
			41.5	-0.04456		41.5	-0.08972
			41.5625	-0.04578		41.625	-0.09155
			41.625	-0.04517		41.625	-0.09583
			41.6875	-0.04517		41.625	-0.09705
			41.75	-0.04272		41.75	-0.09521
			41.75	-0.04028		41.75	-0.09399
			41.8125	-0.03601		41.875	-0.09155
			41.875	-0.03906		41.875	-0.08728
			41.9375	-0.04028		41.875	-0.07874
			42	-0.04272		42	-0.07385
			42	-0.04272		42	-0.06592
			42.0625	-0.04333		42.125	-0.06104
			42.125	-0.04578		42.125	-0.05432
			42.1875	-0.04822		42.125	-0.04639
			42.25	-0.04639		42.25	-0.04517
			42.25	-0.04456		42.25	-0.04089
			42.3125	-0.0415		42.375	-0.04333
			42.375	-0.04028		42.375	-0.04272
			42.4375	-0.0415		42.375	-0.04333
			42.5	-0.03784		42.5	-0.04456
			42.5	-0.03479		42.5	-0.04333
			42.5625	-0.02869		42.625	-0.03967
			42.625	-0.02625		42.625	-0.03784
			42.6875	-0.0238		42.625	-0.03235
			42.75	-0.02197		42.75	-0.03174
			42.75	-0.02258		42.75	-0.03357
			42.8125	-0.0238		42.875	-0.03662
			42.875	-0.02319		42.875	-0.04333
			42.9375	-0.02441		42.875	-0.04517
			43	-0.02808		43	-0.05127
			43	-0.03174		43	-0.05554
			43.0625	-0.0354		43.125	-0.06042
			43.125	-0.03723		43.125	-0.06653
			43.1875	-0.03662		43.125	-0.07019
			43.25	-0.04089		43.25	-0.07019
			43.25	-0.04333		43.25	-0.07202
			43.3125	-0.04883		43.375	-0.07202
			43.375	-0.04761		43.375	-0.07324
			43.4375	-0.05127		43.375	-0.07385
			43.5	-0.05249		43.5	-0.07385
			43.5	-0.05615		43.5	-0.07141
			43.5625	-0.05859		43.625	-0.06836
			43.625	-0.0531		43.625	-0.06714
			43.6875	-0.05554		43.625	-0.06348
			43.75	-0.05249		43.75	-0.06042
			43.75	-0.05005		43.75	-0.05554
			43.8125	-0.04944		43.875	-0.05188
			43.875	-0.04517		43.875	-0.05188
			43.9375	-0.04333		43.875	-0.05249
			44	-0.03906		44	-0.05371
			44	-0.03723		44	-0.05676
			44.0625	-0.0354		44.125	-0.0592
			44.125	-0.03296		44.125	-0.05981
			44.1875	-0.03357		44.125	-0.05981
			44.25	-0.03113		44.25	-0.0592
			44.25	-0.02808		44.25	-0.05859
			44.3125	-0.02747		44.375	-0.05554
			44.375	-0.02686		44.375	-0.05554
			44.4375	-0.02808		44.375	-0.05127
			44.5	-0.02563		44.5	-0.05066
			44.5	-0.02319		44.5	-0.04944
			44.5625	-0.02747		44.625	-0.04944
			44.625	-0.03052		44.625	-0.04517
			44.6875	-0.03662		44.625	-0.04211
			44.75	-0.03784		44.75	-0.03906
			44.75	-0.04028		44.75	-0.03662
			44.8125	-0.04211		44.875	-0.03479
			44.875	-0.04395		44.875	-0.02869
			44.9375	-0.04761		44.875	-0.03052
			45	-0.04883		45	-0.0293
			45	-0.04944		45	-0.03235
			45.0625	-0.04944		45.125	-0.03235
			45.125	-0.047		45.125	-0.03723
			45.1875	-0.04456		45.125	-0.0415
			45.25	-0.0415		45.25	-0.04883
			45.25	-0.03662		45.25	-0.05432
			45.3125	-0.03235		45.375	-0.0592
			45.375	-0.02441		45.375	-0.06592
			45.4375	-0.01892		45.375	-0.06836
			45.5	-0.01648		45.5	-0.07446
			45.5	-0.01465		45.5	-0.0769
			45.5625	-0.0116		45.625	-0.08484
			45.625	-0.00671		45.625	-0.09033
			45.6875	-0.00549		45.625	-0.09766
			45.75	-0.00305		45.75	-0.10071
			45.75	-0.00061		45.75	-0.10376
			45.8125	0.0061		45.875	-0.10498
			45.875	0.01038		45.875	-0.10681
			45.9375	0.01526		45.875	-0.10498
			46	0.0177		46	-0.10193
			46	0.01953		46	-0.10071
			46.0625	0.02625		46.125	-0.10376
			46.125	0.02869		46.125	-0.1062
			46.1875	0.03296		46.125	-0.11108
			46.25	0.03418		46.25	-0.11536
			46.25	0.0354		46.25	-0.12024
			46.3125	0.03479		46.375	-0.1239
			46.375	0.0354		46.375	-0.12756
			46.4375	0.03418		46.375	-0.12634
			46.5	0.03174		46.5	-0.12512
			46.5	0.03296		46.5	-0.11841
			46.5625	0.0293		46.625	-0.11353
			46.625	0.02563		46.625	-0.10803
			46.6875	0.0238		46.625	-0.10498
			46.75	0.02197		46.75	-0.10559
			46.75	0.02319		46.75	-0.10803
			46.8125	0.02319		46.875	-0.11108
			46.875	0.02625		46.875	-0.10925
			46.9375	0.0293		46.875	-0.11353
			47	0.0354		47	-0.11414
			47	0.03906		47	-0.11536
			47.0625	0.04028		47.125	-0.1123
			47.125	0.04028		47.125	-0.11169
			47.1875	0.04028		47.125	-0.11047
			47.25	0.04028		47.25	-0.11047
			47.25	0.03784		47.25	-0.10803
			47.3125	0.0354		47.375	-0.10559
			47.375	0.03113		47.375	-0.10254
			47.4375	0.03052		47.375	-0.10071
			47.5	0.02808		47.5	-0.09949
			47.5	0.02563		47.5	-0.09521
			47.5625	0.02563		47.625	-0.09338
			47.625	0.02441		47.625	-0.09033
			47.6875	0.02441		47.625	-0.08911
			47.75	0.02075		47.75	-0.08789
			47.75	0.02075		47.75	-0.08545
			47.8125	0.01831		47.875	-0.08606
			47.875	0.02014		47.875	-0.08789
			47.9375	0.01526		47.875	-0.0885
			48	0.01038		48	-0.0885
			48	0.0061		48	-0.09155
			48.0625	0.00122		48.125	-0.09583
			48.125	-0.00244		48.125	-0.1001
			48.1875	-0.00916		48.125	-0.10376
			48.25	-0.01648		48.25	-0.10254
			48.25	-0.02686		48.25	-0.1062
			48.3125	-0.03052		48.375	-0.10315
			48.375	-0.03845		48.375	-0.10071
			48.4375	-0.04456		48.375	-0.09338
			48.5	-0.05005		48.5	-0.08667
			48.5	-0.05554		48.5	-0.07874
			48.5625	-0.05798		48.625	-0.07385
			48.625	-0.06165		48.625	-0.06836
			48.6875	-0.06409		48.625	-0.0647
			48.75	-0.06836		48.75	-0.05737
			48.75	-0.06836		48.75	-0.05432
			48.8125	-0.07263		48.875	-0.05005
			48.875	-0.07446		48.875	-0.04578
			48.9375	-0.07813		48.875	-0.04272
			49	-0.07874		49	-0.04211
			49	-0.08057		49	-0.04028
			49.0625	-0.08423		49.125	-0.03967
			49.125	-0.08545		49.125	-0.03906
			49.1875	-0.08789		49.125	-0.04089
			49.25	-0.08545		49.25	-0.03967
			49.25	-0.08606		49.25	-0.03845
			49.3125	-0.0885		49.375	-0.03174
			49.375	-0.09033		49.375	-0.03052
			49.4375	-0.08911		49.375	-0.02808
			49.5	-0.09155		49.5	-0.02563
			49.5	-0.09094		49.5	-0.02441
			49.5625	-0.09033		49.625	-0.01953
			49.625	-0.09155		49.625	-0.01526
			49.6875	-0.08789		49.625	-0.01465
			49.75	-0.0885		49.75	-0.0116
			49.75	-0.08911		49.75	-0.00793
			49.8125	-0.09155		49.875	-0.00305
			49.875	-0.09155		49.875	0.00122
			49.9375	-0.0946		49.875	0.00305
			50	-0.09827		50	0.00305
			50	-0.10193		50	0.00366
			50.0625	-0.10498		50.125	0.00244
			50.125	-0.10376		50.125	0.00488
			50.1875	-0.10437		50.125	0.0061
			50.25	-0.10437		50.25	0.00854
			50.25	-0.10559		50.25	0.01099
			50.3125	-0.10437		50.375	0.0116
			50.375	-0.10681		50.375	0.01465
			50.4375	-0.10803		50.375	0.01953
			50.5	-0.11047		50.5	0.02136
			50.5	-0.1123		50.5	0.02563
			50.5625	-0.1123		50.625	0.02869
			50.625	-0.11353		50.625	0.03235
			50.6875	-0.11292		50.625	0.03845
			50.75	-0.11169		50.75	0.03845
			50.75	-0.10559		50.75	0.03784
			50.8125	-0.10254		50.875	0.03662
			50.875	-0.10132		50.875	0.0354
			50.9375	-0.09827		50.875	0.03845
			51	-0.09705		51	0.03601
			51	-0.09583		51	0.03296
			51.0625	-0.0946		51.125	0.02686
			51.125	-0.0946		51.125	0.0238
			51.1875	-0.09338		51.125	0.01831
			51.25	-0.0885		51.25	0.01648
			51.25	-0.08789		51.25	0.01404
			51.3125	-0.08484		51.375	0.01343
			51.375	-0.08362		51.375	0.00977
			51.4375	-0.08179		51.375	0.00916
			51.5	-0.07813		51.5	0.0061
			51.5	-0.0769		51.5	0.00488
			51.5625	-0.07385		51.625	0.00122
			51.625	-0.07324		51.625	-0.00671
			51.6875	-0.07019		51.625	-0.01282
			51.75	-0.06897		51.75	-0.01892
			51.75	-0.06836		51.75	-0.02258
			51.8125	-0.06775		51.875	-0.02441
			51.875	-0.0647		51.875	-0.02808
			51.9375	-0.06409		51.875	-0.02808
			52	-0.06226		52	-0.02808
			52	-0.06165		52	-0.02319
			52.0625	-0.06226		52.125	-0.02319
			52.125	-0.05859		52.125	-0.0238
			52.1875	-0.06042		52.125	-0.02563
			52.25	-0.0592		52.25	-0.02441
			52.25	-0.06042		52.25	-0.02441
			52.3125	-0.0592		52.375	-0.0177
			52.375	-0.05859		52.375	-0.01648
			52.4375	-0.05859		52.375	-0.01282
			52.5	-0.0592		52.5	-0.00977
			52.5	-0.0592		52.5	-0.00977
			52.5625	-0.05676		52.625	-0.01221
			52.625	-0.05615		52.625	-0.01526
			52.6875	-0.05493		52.625	-0.02014
			52.75	-0.05554		52.75	-0.02563
			52.75	-0.0531		52.75	-0.03235
			52.8125	-0.05371		52.875	-0.03723
			52.875	-0.05066		52.875	-0.03784
			52.9375	-0.0531		52.875	-0.0415
			53	-0.05249		53	-0.04639
			53	-0.05066		53	-0.0531
			53.0625	-0.05127		53.125	-0.05676
			53.125	-0.05005		53.125	-0.05676
			53.1875	-0.05066		53.125	-0.05737
			53.25	-0.04883		53.25	-0.0531
			53.25	-0.04944		53.25	-0.05249
			53.3125	-0.05127		53.375	-0.04883
			53.375	-0.05249		53.375	-0.04272
			53.4375	-0.05249		53.375	-0.03845
			53.5	-0.0531		53.5	-0.0354
			53.5	-0.05432		53.5	-0.03723
			53.5625	-0.05859		53.625	-0.03479
			53.625	-0.06042		53.625	-0.03662
			53.6875	-0.06226		53.625	-0.03845
			53.75	-0.06287		53.75	-0.03845
			53.75	-0.06531		53.75	-0.0415
			53.8125	-0.06775		53.875	-0.04028
			53.875	-0.06958		53.875	-0.03967
			53.9375	-0.07019		53.875	-0.03845
			54	-0.07019		54	-0.03235
			54	-0.07263		54	-0.02869
			54.0625	-0.07263		54.125	-0.02808
			54.125	-0.07263		54.125	-0.02869
			54.1875	-0.0708		54.125	-0.03174
			54.25	-0.07202		54.25	-0.03174
			54.25	-0.0708		54.25	-0.03113
			54.3125	-0.07263		54.375	-0.03174
			54.375	-0.0708		54.375	-0.03296
			54.4375	-0.07385		54.375	-0.03296
			54.5	-0.07446		54.5	-0.02991
			54.5	-0.07629		54.5	-0.02625
			54.5625	-0.07507		54.625	-0.02502
			54.625	-0.07446		54.625	-0.02625
			54.6875	-0.07446		54.625	-0.02686
			54.75	-0.07446		54.75	-0.02625
			54.75	-0.07141		54.75	-0.02869
			54.8125	-0.06653		54.875	-0.03052
			54.875	-0.0647		54.875	-0.03479
			54.9375	-0.06287		54.875	-0.0354
			55	-0.06165		55	-0.03601
			55	-0.05493		55	-0.03235
			55.0625	-0.0531		55.125	-0.02625
			55.125	-0.05005		55.125	-0.01953
			55.1875	-0.05005		55.125	-0.0116
			55.25	-0.04944		55.25	-0.00793
			55.25	-0.05005		55.25	-0.00305
			55.3125	-0.05005		55.375	0
			55.375	-0.0531		55.375	0.0061
			55.4375	-0.05615		55.375	0.00732
			55.5	-0.06104		55.5	0.00793
			55.5	-0.06775		55.5	0.00732
			55.5625	-0.07507		55.625	0.00549
			55.625	-0.08057		55.625	0.00732
			55.6875	-0.08423		55.625	0.00488
			55.75	-0.09033		55.75	0
			55.75	-0.09521		55.75	-0.00122
			55.8125	-0.10132		55.875	-0.00061
			55.875	-0.10315		55.875	0.00122
			55.9375	-0.10437		55.875	0.00244
			56	-0.10742		56	0.00183
			56	-0.10864		56	0.00183
			56.0625	-0.10864		56.125	0.00183
			56.125	-0.11047		56.125	0.00427
			56.1875	-0.10986		56.125	0.00671
			56.25	-0.11414		56.25	0.00854
			56.25	-0.11597		56.25	0.01282
			56.3125	-0.12024		56.375	0.01404
			56.375	-0.12146		56.375	0.02014
			56.4375	-0.12207		56.375	0.02441
			56.5	-0.12024		56.5	0.03296
			56.5	-0.12146		56.5	0.03845
			56.5625	-0.12146		56.625	0.04333
			56.625	-0.12268		56.625	0.04761
			56.6875	-0.12512		56.625	0.05249
			56.75	-0.12634		56.75	0.06226
			56.75	-0.12695		56.75	0.06531
			56.8125	-0.13		56.875	0.06714
			56.875	-0.13123		56.875	0.06592
			56.9375	-0.13306		56.875	0.06592
			57	-0.13184		57	0.06287
			57	-0.13123		57	0.0592
			57.0625	-0.13062		57.125	0.05432
			57.125	-0.13062		57.125	0.04944
			57.1875	-0.12878		57.125	0.04944
			57.25	-0.12939		57.25	0.047
			57.25	-0.12634		57.25	0.04822
			57.3125	-0.12573		57.375	0.047
			57.375	-0.12878		57.375	0.04822
			57.4375	-0.12939		57.375	0.047
			57.5	-0.12878		57.5	0.04639
			57.5	-0.12573		57.5	0.04395
			57.5625	-0.12085		57.625	0.04272
			57.625	-0.11414		57.625	0.04456
			57.6875	-0.11047		57.625	0.0415
			57.75	-0.10193		57.75	0.04272
			57.75	-0.1001		57.75	0.04272
			57.8125	-0.09338		57.875	0.04578
			57.875	-0.08972		57.875	0.04639
			57.9375	-0.08423		57.875	0.04333
			58	-0.08118		58	0.03784
			58	-0.07568		58	0.03418
			58.0625	-0.07019		58.125	0.03296
			58.125	-0.06409		58.125	0.03052
			58.1875	-0.06042		58.125	0.0293
			58.25	-0.0592		58.25	0.02747
			58.25	-0.05798		58.25	0.03052
			58.3125	-0.05493		58.375	0.03357
			58.375	-0.05127		58.375	0.03723
			58.4375	-0.05127		58.375	0.03906
			58.5	-0.05249		58.5	0.04333
			58.5	-0.05371		58.5	0.05432
			58.5625	-0.05676		58.625	0.07385
			58.625	-0.05615		58.625	0.11719
			58.6875	-0.05737		58.625	0.18677
			58.75	-0.05798		58.75	0.29419
			58.75	-0.05859		58.75	0.42725
			58.8125	-0.05554		58.875	0.58594
			58.875	-0.05554		58.875	0.75256
			58.9375	-0.05066		58.875	0.91492
			59	-0.04761		59	1.06079
			59	-0.04333		59	1.18225
			59.0625	-0.03723		59.125	1.28357
			59.125	-0.03235		59.125	1.36292
			59.1875	-0.02563		59.125	1.42944
			59.25	-0.02197		59.25	1.47949
			59.25	-0.0177		59.25	1.52771
			59.3125	-0.01587		59.375	1.56799
			59.375	-0.01465		59.375	1.60645
			59.4375	-0.01282		59.375	1.63635
			59.5	-0.00916		59.5	1.65649
			59.5	-0.00122		59.5	1.66077
			59.5625	0.00244		59.625	1.64429
			59.625	0.00671		59.625	1.60645
			59.6875	0.01221		59.625	1.54907
			59.75	0.01892		59.75	1.47339
			59.75	0.02197		59.75	1.38184
			59.8125	0.02441		59.875	1.27502
			59.875	0.02197		59.875	1.15356
			59.9375	0.02136		59.875	1.02478
			60	0.01953		60	0.88562
			60	0.01892		60	0.73792
			60.0625	0.0177		60.125	0.58044
			60.125	0.01465		60.125	0.41687
			60.1875	0.01465		60.125	0.24719
			60.25	0.01526		60.25	0.07263
			60.25	0.01526		60.25	-0.09949
			60.3125	0.0177		60.375	-0.26978
			60.375	0.01831		60.375	-0.43579
			60.4375	0.0177		60.375	-0.59631
			60.5	0.01587		60.5	-0.74524
			60.5	0.01221		60.5	-0.88501
			60.5625	0.00916		60.625	-1.01685
			60.625	0.00854		60.625	-1.13831
			60.6875	0.00122		60.625	-1.25305
			60.75	-0.00244		60.75	-1.35803
			60.75	-0.01038		60.75	-1.4563
			60.8125	-0.01221		60.875	-1.54907
			60.875	-0.01465		60.875	-1.63757
			60.9375	-0.02014		60.875	-1.71875
			61	-0.02563		61	-1.7926
			61	-0.02991		61	-1.85974
			61.0625	-0.03235		61.125	-1.91467
			61.125	-0.03296		61.125	-1.95862
			61.1875	-0.03662		61.125	-1.98975
			61.25	-0.03784		61.25	-2.00867
			61.25	-0.03906		61.25	-2.01233
			61.3125	-0.04089		61.375	-2.00256
			61.375	-0.03967		61.375	-1.97937
			61.4375	-0.03845		61.375	-1.9397
			61.5	-0.03967		61.5	-1.89575
			61.5	-0.03906		61.5	-1.84631
			61.5625	-0.0415		61.625	-1.78955
			61.625	-0.04272		61.625	-1.72791
			61.6875	-0.0415		61.625	-1.66443
			61.75	-0.04211		61.75	-1.59729
			61.75	-0.04211		61.75	-1.53076
			61.8125	-0.04272		61.875	-1.45935
			61.875	-0.04028		61.875	-1.38489
			61.9375	-0.03906		61.875	-1.31287
			62	-0.03296		62	-1.23718
			62	-0.03357		62	-1.16577
			62.0625	-0.03418		62.125	-1.09436
			62.125	-0.03479		62.125	-1.02356
			62.1875	-0.03296		62.125	-0.95764
			62.25	-0.0293		62.25	-0.89294
			62.25	-0.02808		62.25	-0.83252
			62.3125	-0.02808		62.375	-0.77393
			62.375	-0.02625		62.375	-0.71838
			62.4375	-0.02136		62.375	-0.66895
			62.5	-0.02258		62.5	-0.62073
			62.5	-0.01953		62.5	-0.57556
			62.5625	-0.02136		62.625	-0.53345
			62.625	-0.01953		62.625	-0.49561
			62.6875	-0.01831		62.625	-0.45959
			62.75	-0.01709		62.75	-0.42542
			62.75	-0.01648		62.75	-0.39551
			62.8125	-0.01892		62.875	-0.37048
			62.875	-0.02136		62.875	-0.34912
			62.9375	-0.02991		62.875	-0.33081
			63	-0.03784		63	-0.31128
			63	-0.04761		63	-0.29236
			63.0625	-0.05188		63.125	-0.27344
			63.125	-0.05798		63.125	-0.25391
			63.1875	-0.06226		63.125	-0.23499
			63.25	-0.0647		63.25	-0.21179
			63.25	-0.06592		63.25	-0.19104
			63.3125	-0.06104		63.375	-0.17334
			63.375	-0.06104		63.375	-0.15198
			63.4375	-0.0592		63.375	-0.13489
			63.5	-0.05676		63.5	-0.11902
			63.5	-0.05249		63.5	-0.10742
			63.5625	-0.04883		63.625	-0.09705
			63.625	-0.04639		63.625	-0.08667
			63.6875	-0.04517		63.625	-0.0769
			63.75	-0.04578		63.75	-0.07202
			63.75	-0.04578		63.75	-0.06714
			63.8125	-0.04578		63.875	-0.06348
			63.875	-0.04761		63.875	-0.05615
			63.9375	-0.04639		63.875	-0.05188
			64	-0.04395		64	-0.04883
			64	-0.04395		64	-0.04333
			64.0625	-0.03967		64.125	-0.03784
			64.125	-0.03723		64.125	-0.02686
			64.1875	-0.03113		64.125	-0.02197
			64.25	-0.02991		64.25	-0.02014
			64.25	-0.03296		64.25	-0.02563
			64.3125	-0.0354		64.375	-0.02869
			64.375	-0.03845		64.375	-0.03662
			64.4375	-0.03601		64.375	-0.04517
			64.5	-0.03662		64.5	-0.0531
			64.5	-0.03662		64.5	-0.06042
			64.5625	-0.03662		64.625	-0.06409
			64.625	-0.03601		64.625	-0.06714
			64.6875	-0.03296		64.625	-0.06897
			64.75	-0.03113		64.75	-0.07019
			64.75	-0.03235		64.75	-0.06775
			64.8125	-0.03296		64.875	-0.06897
			64.875	-0.03479		64.875	-0.06592
			64.9375	-0.03174		64.875	-0.06592
			65	-0.03052		65	-0.0647
			65	-0.02747		65	-0.06287
			65.0625	-0.02441		65.125	-0.06409
			65.125	-0.02136		65.125	-0.06531
			65.1875	-0.01709		65.125	-0.06592
			65.25	-0.01526		65.25	-0.06714
			65.25	-0.01038		65.25	-0.06958
			65.3125	-0.00977		65.375	-0.0708
			65.375	-0.0116		65.375	-0.07263
			65.4375	-0.0116		65.375	-0.07324
			65.5	-0.0116		65.5	-0.07507
			65.5	-0.00916		65.5	-0.07751
			65.5625	-0.00793		65.625	-0.07996
			65.625	-0.00793		65.625	-0.08057
			65.6875	-0.00854		65.625	-0.07874
			65.75	-0.00793		65.75	-0.07813
			65.75	-0.00244		65.75	-0.08118
			65.8125	0.00122		65.875	-0.0824
			65.875	0.00549		65.875	-0.08545
			65.9375	0.00732		65.875	-0.09033
			66	0.0116		66	-0.09644
			66	0.01526		66	-0.10254
			66.0625	0.01709		66.125	-0.11108
			66.125	0.0177		66.125	-0.11414
			66.1875	0.01587		66.125	-0.12146
			66.25	0.01892		66.25	-0.12512
			66.25	0.01892		66.25	-0.12756
			66.3125	0.02075		66.375	-0.12756
			66.375	0.02502		66.375	-0.12817
			66.4375	0.02686		66.375	-0.12756
			66.5	0.0293		66.5	-0.13
			66.5	0.02686		66.5	-0.13306
			66.5625	0.02502		66.625	-0.13489
			66.625	0.02197		66.625	-0.13916
			66.6875	0.02075		66.625	-0.14038
			66.75	0.01831		66.75	-0.14282
			66.75	0.01343		66.75	-0.14404
			66.8125	0.01343		66.875	-0.14648
			66.875	0.0116		66.875	-0.15015
			66.9375	0.01221		66.875	-0.1532
			67	0.00916		67	-0.15686
			67	0.00488		67	-0.15747
			67.0625	0.00183		67.125	-0.16052
			67.125	0.00183		67.125	-0.16174
			67.1875	-0.00183		67.125	-0.16418
			67.25	-0.00427		67.25	-0.16602
			67.25	-0.00732		67.25	-0.16663
			67.3125	-0.00916		67.375	-0.16602
			67.375	-0.00916		67.375	-0.16602
			67.4375	-0.01038		67.375	-0.16296
			67.5	-0.00854		67.5	-0.15869
			67.5	-0.00793		67.5	-0.15808
			67.5625	-0.00671		67.625	-0.1593
			67.625	-0.0061		67.625	-0.16052
			67.6875	-0.00549		67.625	-0.16235
			67.75	-0.00488		67.75	-0.16357
			67.75	-0.00122		67.75	-0.16296
			67.8125	0		67.875	-0.16113
			67.875	-0.00183		67.875	-0.15625
			67.9375	-0.00183		67.875	-0.14954
			68	-0.00061		68	-0.14404
			68	0.00183		68	-0.14099
			68.0625	0.00122		68.125	-0.13794
			68.125	-0.00427		68.125	-0.13367
			68.1875	-0.00854		68.125	-0.13245
			68.25	-0.01343		68.25	-0.13
			68.25	-0.01892		68.25	-0.12634
			68.3125	-0.02441		68.375	-0.11902
			68.375	-0.03174		68.375	-0.11108
			68.4375	-0.03723		68.375	-0.10498
			68.5	-0.04211		68.5	-0.10071
			68.5	-0.04517		68.5	-0.09521
			68.5625	-0.05066		68.625	-0.08972
			68.625	-0.05432		68.625	-0.08362
			68.6875	-0.05798		68.625	-0.08057
			68.75	-0.05798		68.75	-0.07629
			68.75	-0.0592		68.75	-0.0708
			68.8125	-0.06104		68.875	-0.0647
			68.875	-0.06226		68.875	-0.05798
			68.9375	-0.06348		68.875	-0.05005
			69	-0.0647		69	-0.047
			69	-0.06836		69	-0.04089
			69.0625	-0.0708		69.125	-0.04089
			69.125	-0.07446		69.125	-0.03967
			69.1875	-0.07813		69.125	-0.03906
			69.25	-0.08423		69.25	-0.03723
			69.25	-0.09094		69.25	-0.03601
			69.3125	-0.09338		69.375	-0.03113
			69.375	-0.09399		69.375	-0.03174
			69.4375	-0.09399		69.375	-0.02563
			69.5	-0.0946		69.5	-0.02258
			69.5	-0.09583		69.5	-0.02014
			69.5625	-0.09521		69.625	-0.02014
			69.625	-0.09583		69.625	-0.02136
			69.6875	-0.10071		69.625	-0.02197
			69.75	-0.10315		69.75	-0.02197
			69.75	-0.10925		69.75	-0.02319
			69.8125	-0.1123		69.875	-0.02258
			69.875	-0.11414		69.875	-0.0238
			69.9375	-0.11658		69.875	-0.01709
			70	-0.11414		70	-0.01343
			70	-0.11108		70	-0.00793
			70.0625	-0.10681		70.125	-0.00427
			70.125	-0.10193		70.125	-0.00183
			70.1875	-0.09888		70.125	0.00122
			70.25	-0.09644		70.25	0.00305
			70.25	-0.09277		70.25	0.00366
			70.3125	-0.09338		70.375	0.00549
			70.375	-0.09399		70.375	0.0061
			70.4375	-0.09277		70.375	0.00366
			70.5	-0.09277		70.5	0.00061
			70.5	-0.09155		70.5	-0.00183
			70.5625	-0.09277		70.625	0.00061
			70.625	-0.09155		70.625	-0.00061
			70.6875	-0.09033		70.625	-0.00061
			70.75	-0.08789		70.75	-0.00061
			70.75	-0.08606		70.75	-0.00244
			70.8125	-0.08484		70.875	-0.00122
			70.875	-0.08118		70.875	-0.00305
			70.9375	-0.07751		70.875	-0.00916
			71	-0.07629		71	-0.01282
			71	-0.0769		71	-0.0177
			71.0625	-0.07629		71.125	-0.01892
			71.125	-0.0769		71.125	-0.02014
			71.1875	-0.0769		71.125	-0.02319
			71.25	-0.07813		71.25	-0.02625
			71.25	-0.07935		71.25	-0.02747
			71.3125	-0.07996		71.375	-0.03052
			71.375	-0.07935		71.375	-0.03174
			71.4375	-0.07874		71.375	-0.03479
			71.5	-0.07874		71.5	-0.03479
			71.5	-0.07507		71.5	-0.03357
			71.5625	-0.07141		71.625	-0.03662
			71.625	-0.06592		71.625	-0.03601
			71.6875	-0.06042		71.625	-0.03906
			71.75	-0.05737		71.75	-0.03906
			71.75	-0.05371		71.75	-0.04517
			71.8125	-0.04944		71.875	-0.05005
			71.875	-0.04761		71.875	-0.05554
			71.9375	-0.04456		71.875	-0.05615
			72	-0.04211		72	-0.0592
			72	-0.03967		72	-0.06104
			72.0625	-0.03662		72.125	-0.06348
			72.125	-0.03845		72.125	-0.06104
			72.1875	-0.03845		72.125	-0.05554
			72.25	-0.04333		72.25	-0.05005
			72.25	-0.04395		72.25	-0.04822
			72.3125	-0.047		72.375	-0.047
			72.375	-0.05249		72.375	-0.04456
			72.4375	-0.05798		72.375	-0.0415
			72.5	-0.06042		72.5	-0.04089
			72.5	-0.06592		72.5	-0.03906
			72.5625	-0.06836		72.625	-0.04211
			72.625	-0.0708		72.625	-0.04272
			72.6875	-0.07507		72.625	-0.04578
			72.75	-0.07385		72.75	-0.04944
			72.75	-0.07751		72.75	-0.04944
			72.8125	-0.07568		72.875	-0.05127
			72.875	-0.07813		72.875	-0.05188
			72.9375	-0.07507		72.875	-0.05493
			73	-0.07751		73	-0.05737
			73	-0.0769		73	-0.0592
			73.0625	-0.07813		73.125	-0.0592
			73.125	-0.07996		73.125	-0.06226
			73.1875	-0.08118		73.125	-0.0647
			73.25	-0.08362		73.25	-0.06653
			73.25	-0.08362		73.25	-0.06531
			73.3125	-0.08423		73.375	-0.06287
			73.375	-0.08118		73.375	-0.06165
			73.4375	-0.0769		73.375	-0.06042
			73.5	-0.07263		73.5	-0.05798
			73.5	-0.07202		73.5	-0.05493
			73.5625	-0.06958		73.625	-0.05249
			73.625	-0.07263		73.625	-0.05249
			73.6875	-0.07629		73.625	-0.05371
			73.75	-0.07874		73.75	-0.05371
			73.75	-0.08362		73.75	-0.05615
			73.8125	-0.08362		73.875	-0.05798
			73.875	-0.08423		73.875	-0.06165
			73.9375	-0.08301		73.875	-0.06348
			74	-0.08179		74	-0.06592
			74	-0.07751		74	-0.06714
			74.0625	-0.07629		74.125	-0.06775
			74.125	-0.07385		74.125	-0.0647
			74.1875	-0.0769		74.125	-0.0592
			74.25	-0.07629		74.25	-0.06042
			74.25	-0.07874		74.25	-0.05981
			74.3125	-0.08118		74.375	-0.05981
			74.375	-0.0824		74.375	-0.05859
			74.4375	-0.08362		74.375	-0.05493
			74.5	-0.0824		74.5	-0.05798
			74.5	-0.07996		74.5	-0.05737
			74.5625	-0.07751		74.625	-0.05981
			74.625	-0.07507		74.625	-0.06226
			74.6875	-0.07019		74.625	-0.06165
			74.75	-0.06653		74.75	-0.06409
			74.75	-0.06409		74.75	-0.06409
			74.8125	-0.06226		74.875	-0.06226
			74.875	-0.05981		74.875	-0.05737
			74.9375	-0.05859		74.875	-0.05005
			75	-0.05615		75	-0.04517
			75	-0.05737		75	-0.04272
			75.0625	-0.05798		75.125	-0.03845
			75.125	-0.06104		75.125	-0.03906
			75.1875	-0.06104		75.125	-0.04089
			75.25	-0.06287		75.25	-0.03967
			75.25	-0.06531		75.25	-0.03723
			75.3125	-0.0708		75.375	-0.03662
			75.375	-0.07263		75.375	-0.03479
			75.4375	-0.07751		75.375	-0.03235
			75.5	-0.08118		75.5	-0.02869
			75.5	-0.08484		75.5	-0.02686
			75.5625	-0.0885		75.625	-0.02747
			75.625	-0.08667		75.625	-0.02747
			75.6875	-0.09094		75.625	-0.02686
			75.75	-0.09521		75.75	-0.0238
			75.75	-0.09705		75.75	-0.02136
			75.8125	-0.09766		75.875	-0.01526
			75.875	-0.09888		75.875	-0.01282
			75.9375	-0.1001		75.875	-0.00854
			76	-0.10132		76	-0.00488
			76	-0.10193		76	-0.00305
			76.0625	-0.10315		76.125	0.00183
			76.125	-0.1062		76.125	0.00122
			76.1875	-0.11292		76.125	0.00122
			76.25	-0.1178		76.25	-0.00061
			76.25	-0.12268		76.25	-0.00244
			76.3125	-0.1239		76.375	-0.00244
			76.375	-0.12512		76.375	-0.00549
			76.4375	-0.12756		76.375	-0.00732
			76.5	-0.12878		76.5	-0.01038
			76.5	-0.12451		76.5	-0.01099
			76.5625	-0.12329		76.625	-0.01099
			76.625	-0.11841		76.625	-0.00793
			76.6875	-0.11414		76.625	-0.00671
			76.75	-0.10986		76.75	-0.00549
			76.75	-0.10742		76.75	-0.00183
			76.8125	-0.1062		76.875	0.00061
			76.875	-0.10315		76.875	0.01038
			76.9375	-0.10071		76.875	0.01221
			77	-0.09705		77	0.01343
			77	-0.09827		77	0.01282
			77.0625	-0.09888		77.125	0.01465
			77.125	-0.10193		77.125	0.01526
			77.1875	-0.10193		77.125	0.01526
			77.25	-0.10437		77.25	0.01526
			77.25	-0.10681		77.25	0.0116
			77.3125	-0.10986		77.375	0.01343
			77.375	-0.11292		77.375	0.01099
			77.4375	-0.11108		77.375	0.01282
			77.5	-0.11047		77.5	0.01221
			77.5	-0.1123		77.5	0.01099
			77.5625	-0.11169		77.625	0.00732
			77.625	-0.10925		77.625	0.00366
			77.6875	-0.10681		77.625	0.00061
			77.75	-0.10315		77.75	-0.00183
			77.75	-0.10132		77.75	-0.00549
			77.8125	-0.10071		77.875	-0.00732
			77.875	-0.09644		77.875	-0.00732
			77.9375	-0.09521		77.875	-0.00732
			78	-0.09094		78	-0.00427
			78	-0.08789		78	-0.00549
			78.0625	-0.0824		78.125	-0.00854
			78.125	-0.07996		78.125	-0.0116
			78.1875	-0.07813		78.125	-0.01526
			78.25	-0.0769		78.25	-0.01831
			78.25	-0.07385		78.25	-0.02563
			78.3125	-0.07141		78.375	-0.03235
			78.375	-0.06836		78.375	-0.04211
			78.4375	-0.06714		78.375	-0.04395
			78.5	-0.06348		78.5	-0.04883
			78.5	-0.05859		78.5	-0.04944
			78.5625	-0.05371		78.625	-0.05249
			78.625	-0.05005		78.625	-0.05554
			78.6875	-0.04822		78.625	-0.05737
			78.75	-0.04822		78.75	-0.06042
			78.75	-0.04639		78.75	-0.06226
			78.8125	-0.04456		78.875	-0.06348
			78.875	-0.04333		78.875	-0.06348
			78.9375	-0.04517		78.875	-0.06653
			79	-0.04272		79	-0.06592
			79	-0.04211		79	-0.06653
			79.0625	-0.03967		79.125	-0.06409
			79.125	-0.03479		79.125	-0.06531
			79.1875	-0.02991		79.125	-0.06958
			79.25	-0.0238		79.25	-0.07446
			79.25	-0.01709		79.25	-0.07874
			79.3125	-0.01221		79.375	-0.07996
			79.375	-0.00305		79.375	-0.08423
			79.4375	0.00549		79.375	-0.0885
			79.5	0.00977		79.5	-0.09644
			79.5	0.01282		79.5	-0.10071
			79.5625	0.01343		79.625	-0.10498
			79.625	0.01709		79.625	-0.10803
			79.6875	0.01953		79.625	-0.11169
			79.75	0.01892		79.75	-0.1123
			79.75	0.01709		79.75	-0.11108
			79.8125	0.01221		79.875	-0.10986
			79.875	0.00977		79.875	-0.10864
			79.9375	0.00549		79.875	-0.10681
			80	0.00061		80	-0.10315
			80	-0.00488		80	-0.10071
			80.0625	-0.00793		80.125	-0.0946
			80.125	-0.00977		80.125	-0.09094
			80.1875	-0.00916		80.125	-0.08606
			80.25	-0.00793		80.25	-0.0824
			80.25	-0.00366		80.25	-0.08423
			80.3125	-0.00122		80.375	-0.08911
			80.375	0		80.375	-0.09277
			80.4375	0		80.375	-0.09766
			80.5	0.00061		80.5	-0.10132
			80.5	0.00122		80.5	-0.1062
			80.5625	-0.00061		80.625	-0.11108
			80.625	-0.00488		80.625	-0.1123
			80.6875	-0.0061		80.625	-0.11108
			80.75	-0.01038		80.75	-0.11047
			80.75	-0.00732		80.75	-0.11047
			80.8125	-0.01038		80.875	-0.11108
			80.875	-0.01404		80.875	-0.10864
			80.9375	-0.01587		80.875	-0.10742
			81	-0.0177		81	-0.10742
			81	-0.01648		81	-0.10742
			81.0625	-0.01526		81.125	-0.10925
			81.125	-0.01892		81.125	-0.10864
			81.1875	-0.01953		81.125	-0.10925
			81.25	-0.02136		81.25	-0.10925
			81.25	-0.02502		81.25	-0.10681
			81.3125	-0.02563		81.375	-0.10803
			81.375	-0.02808		81.375	-0.10681
			81.4375	-0.02991		81.375	-0.10803
			81.5	-0.02991		81.5	-0.10681
			81.5	-0.03113		81.5	-0.10559
			81.5625	-0.02869		81.625	-0.1001
			81.625	-0.02869		81.625	-0.09827
			81.6875	-0.02991		81.625	-0.09521
			81.75	-0.03235		81.75	-0.09338
			81.75	-0.03662		81.75	-0.0885
			81.8125	-0.03662		81.875	-0.08545
			81.875	-0.03784		81.875	-0.08423
			81.9375	-0.03784		81.875	-0.0824
			82	-0.03906		82	-0.08362
			82	-0.0415		82	-0.07935
			82.0625	-0.0415		82.125	-0.07935
			82.125	-0.03662		82.125	-0.07629
			82.1875	-0.03479		82.125	-0.07324
			82.25	-0.03296		82.25	-0.06958
			82.25	-0.03357		82.25	-0.06592
			82.3125	-0.03235		82.375	-0.06165
			82.375	-0.03357		82.375	-0.06165
			82.4375	-0.03662		82.375	-0.06104
			82.5	-0.03723		82.5	-0.06348
			82.5	-0.04272		82.5	-0.06714
			82.5625	-0.04456		82.625	-0.06775
			82.625	-0.04883		82.625	-0.07141
			82.6875	-0.05005		82.625	-0.06714
			82.75	-0.05127		82.75	-0.06958
			82.75	-0.0531		82.75	-0.07019
			82.8125	-0.05371		82.875	-0.07385
			82.875	-0.0531		82.875	-0.07568
			82.9375	-0.05188		82.875	-0.07813
			83	-0.04883		83	-0.08118
			83	-0.04333		83	-0.08423
			83.0625	-0.03967		83.125	-0.08423
			83.125	-0.03662		83.125	-0.08484
			83.1875	-0.03113		83.125	-0.08606
			83.25	-0.0238		83.25	-0.0885
			83.25	-0.01892		83.25	-0.0946
			83.3125	-0.0177		83.375	-0.09766
			83.375	-0.01709		83.375	-0.1001
			83.4375	-0.01709		83.375	-0.1001
			83.5	-0.01831		83.5	-0.1001
			83.5	-0.01709		83.5	-0.09766
			83.5625	-0.02136		83.625	-0.09338
			83.625	-0.02502		83.625	-0.08972
			83.6875	-0.02625		83.625	-0.08484
			83.75	-0.0293		83.75	-0.07935
			83.75	-0.02991		83.75	-0.07141
			83.8125	-0.03357		83.875	-0.06348
			83.875	-0.03479		83.875	-0.05859
			83.9375	-0.03906		83.875	-0.05127
			84	-0.0415		84	-0.04822
			84	-0.04272		84	-0.04639
			84.0625	-0.04333		84.125	-0.04639
			84.125	-0.0415		84.125	-0.04883
			84.1875	-0.04517		84.125	-0.05127
			84.25	-0.047		84.25	-0.05371
			84.25	-0.047		84.25	-0.05493
			84.3125	-0.04761		84.375	-0.05615
			84.375	-0.04333		84.375	-0.05798
			84.4375	-0.04395		84.375	-0.05859
			84.5	-0.04333		84.5	-0.0531
			84.5	-0.04211		84.5	-0.05188
			84.5625	-0.04028		84.625	-0.05066
			84.625	-0.03479		84.625	-0.047
			84.6875	-0.03479		84.625	-0.04517
			84.75	-0.03479		84.75	-0.04395
			84.75	-0.03235		84.75	-0.047
			84.8125	-0.02991		84.875	-0.05066
			84.875	-0.02502		84.875	-0.05493
			84.9375	-0.02319		84.875	-0.05676
			85	-0.02014		85	-0.06287
			85	-0.0177		85	-0.06653
			85.0625	-0.01648		85.125	-0.0708
			85.125	-0.01526		85.125	-0.07202
			85.1875	-0.01404		85.125	-0.07263
			85.25	-0.01221		85.25	-0.07324
			85.25	-0.01343		85.25	-0.07568
			85.3125	-0.01465		85.375	-0.07751
			85.375	-0.01526		85.375	-0.07996
			85.4375	-0.01282		85.375	-0.08423
			85.5	-0.00549		85.5	-0.08911
			85.5	-0.00244		85.5	-0.09644
			85.5625	0.00366		85.625	-0.09949
			85.625	0.00977		85.625	-0.10376
			85.6875	0.01709		85.625	-0.1062
			85.75	0.02258		85.75	-0.10742
			85.75	0.02319		85.75	-0.10681
			85.8125	0.02136		85.875	-0.10254
			85.875	0.01953		85.875	-0.09583
			85.9375	0.02197		85.875	-0.09399
			86	0.02136		86	-0.0885
			86	0.02258		86	-0.08728
			86.0625	0.02258		86.125	-0.08606
			86.125	0.02441		86.125	-0.08789
			86.1875	0.02869		86.125	-0.08911
			86.25	0.03296		86.25	-0.09033
			86.25	0.03845		86.25	-0.09094
			86.3125	0.04211		86.375	-0.09277
			86.375	0.04517		86.375	-0.09583
			86.4375	0.04639		86.375	-0.09888
			86.5	0.04761		86.5	-0.10193
			86.5	0.04761		86.5	-0.10376
			86.5625	0.04639		86.625	-0.10864
			86.625	0.04517		86.625	-0.11047
			86.6875	0.04089		86.625	-0.11169
			86.75	0.03784		86.75	-0.11047
			86.75	0.03479		86.75	-0.1123
			86.8125	0.0354		86.875	-0.11292
			86.875	0.03357		86.875	-0.11536
			86.9375	0.02808		86.875	-0.11536
			87	0.0238		87	-0.11719
			87	0.02014		87	-0.11902
			87.0625	0.0177		87.125	-0.12085
			87.125	0.01465		87.125	-0.12085
			87.1875	0.01038		87.125	-0.11902
			87.25	0.00488		87.25	-0.11902
			87.25	0.00305		87.25	-0.11963
			87.3125	0.00061		87.375	-0.12146
			87.375	-0.00305		87.375	-0.11841
			87.4375	-0.00427		87.375	-0.11536
			87.5	-0.00671		87.5	-0.11353
			87.5	-0.00854		87.5	-0.10925
			87.5625	-0.01038		87.625	-0.1062
			87.625	-0.00977		87.625	-0.10376
			87.6875	-0.00793		87.625	-0.10193
			87.75	-0.00488		87.75	-0.10437
			87.75	-0.00549		87.75	-0.10315
			87.8125	-0.00732		87.875	-0.10132
			87.875	-0.00671		87.875	-0.09827
			87.9375	-0.0061		87.875	-0.09155
			88	-0.0061		88	-0.08362
			88	-0.00854		88	-0.07813
			88.0625	-0.01099		88.125	-0.06775
			88.125	-0.0116		88.125	-0.06409
			88.1875	-0.0116		88.125	-0.0592
			88.25	-0.01404		88.25	-0.05737
			88.25	-0.02014		88.25	-0.05249
			88.3125	-0.02747		88.375	-0.05005
			88.375	-0.03235		88.375	-0.04639
			88.4375	-0.0354		88.375	-0.04456
			88.5	-0.03967		88.5	-0.04028
			88.5	-0.04272		88.5	-0.03601
			88.5625	-0.047		88.625	-0.03113
			88.625	-0.04761		88.625	-0.02869
			88.6875	-0.04822		88.625	-0.02563
			88.75	-0.04883		88.75	-0.02136
			88.75	-0.047		88.75	-0.01953
			88.8125	-0.04639		88.875	-0.01953
			88.875	-0.04578		88.875	-0.02136
			88.9375	-0.04822		88.875	-0.02319
			89	-0.05127		89	-0.02502
			89	-0.05371		89	-0.02625
			89.0625	-0.05737		89.125	-0.02808
			89.125	-0.06287		89.125	-0.0293
			89.1875	-0.06836		89.125	-0.02991
			89.25	-0.07385		89.25	-0.03113
			89.25	-0.07751		89.25	-0.03174
			89.3125	-0.0824		89.375	-0.03052
			89.375	-0.08667		89.375	-0.02625
			89.4375	-0.09094		89.375	-0.02014
			89.5	-0.09644		89.5	-0.0116
			89.5	-0.09766		89.5	-0.00366
			89.5625	-0.1001		89.625	0.00488
			89.625	-0.09888		89.625	0.01831
			89.6875	-0.09888		89.625	0.02319
			89.75	-0.09583		89.75	0.0293
			89.75	-0.09399		89.75	0.03235
			89.8125	-0.09094		89.875	0.03479
			89.875	-0.08667		89.875	0.03906
			89.9375	-0.08606		89.875	0.03845
			90	-0.08545		90	0.03662
			90	-0.08667		90	0.03479
			90.0625	-0.08545		90.125	0.03174
			90.125	-0.0885		90.125	0.03052
			90.1875	-0.08972		90.125	0.02686
			90.25	-0.09338		90.25	0.02441
			90.25	-0.09766		90.25	0.02258
			90.3125	-0.09827		90.375	0.0177
			90.375	-0.10315		90.375	0.01343
			90.4375	-0.10254		90.375	0.00854
			90.5	-0.10681		90.5	0.00488
			90.5	-0.1062		90.5	0.00549
			90.5625	-0.10742		90.625	0.00427
			90.625	-0.10376		90.625	0.00305
			90.6875	-0.10193		90.625	0.0061
			90.75	-0.09949		90.75	0.00671
			90.75	-0.09766		90.75	0.00854
			90.8125	-0.09399		90.875	0.00854
			90.875	-0.09033		90.875	0.00977
			90.9375	-0.08911		90.875	0.00977
			91	-0.08545		91	0.01282
			91	-0.08789		91	0.01099
			91.0625	-0.08606		91.125	0.01099
			91.125	-0.08972		91.125	0.00671
			91.1875	-0.09155		91.125	0.00671
			91.25	-0.09277		91.25	0.00488
			91.25	-0.0946		91.25	0.00366
			91.3125	-0.09521		91.375	0.00122
			91.375	-0.09521		91.375	-0.00061
			91.4375	-0.09399		91.375	-0.00061
			91.5	-0.09399		91.5	-0.00183
			91.5	-0.08972		91.5	-0.00366
			91.5625	-0.09155		91.625	-0.0061
			91.625	-0.09033		91.625	-0.0116
			91.6875	-0.09216		91.625	-0.01648
			91.75	-0.08972		91.75	-0.0238
			91.75	-0.09033		91.75	-0.02991
			91.8125	-0.08789		91.875	-0.03418
			91.875	-0.08606		91.875	-0.03601
			91.9375	-0.08667		91.875	-0.03845
			92	-0.08179		92	-0.03723
			92	-0.08423		92	-0.03662
			92.0625	-0.08301		92.125	-0.03174
			92.125	-0.08301		92.125	-0.03174
			92.1875	-0.07935		92.125	-0.03052
			92.25	-0.07446		92.25	-0.03235
			92.25	-0.07141		92.25	-0.03723
			92.3125	-0.06958		92.375	-0.03784
			92.375	-0.06531		92.375	-0.0415
			92.4375	-0.06409		92.375	-0.04395
			92.5	-0.06409		92.5	-0.04517
			92.5	-0.06165		92.5	-0.04395
			92.5625	-0.06165		92.625	-0.04089
			92.625	-0.05554		92.625	-0.03662
			92.6875	-0.05493		92.625	-0.03235
			92.75	-0.05066		92.75	-0.0293
			92.75	-0.04822		92.75	-0.02991
			92.8125	-0.04517		92.875	-0.0293
			92.875	-0.04211		92.875	-0.02991
			92.9375	-0.04333		92.875	-0.03113
			93	-0.04639		93	-0.03479
			93	-0.04944		93	-0.03784
			93.0625	-0.04883		93.125	-0.0415
			93.125	-0.05005		93.125	-0.04211
			93.1875	-0.05188		93.125	-0.04456
			93.25	-0.05371		93.25	-0.04395
			93.25	-0.05493		93.25	-0.04456
			93.3125	-0.05737		93.375	-0.04639
			93.375	-0.0592		93.375	-0.04456
			93.4375	-0.06409		93.375	-0.04395
			93.5	-0.06531		93.5	-0.04211
			93.5	-0.06653		93.5	-0.04272
			93.5625	-0.06897		93.625	-0.04517
			93.625	-0.06897		93.625	-0.04578
			93.6875	-0.06897		93.625	-0.04822
			93.75	-0.06958		93.75	-0.04578
			93.75	-0.06775		93.75	-0.047
			93.8125	-0.07019		93.875	-0.04822
			93.875	-0.07263		93.875	-0.04395
			93.9375	-0.07507		93.875	-0.04639
			94	-0.07813		94	-0.04333
			94	-0.08057		94	-0.04395
			94.0625	-0.08606		94.125	-0.04272
			94.125	-0.08911		94.125	-0.04211
			94.1875	-0.09277		94.125	-0.04395
			94.25	-0.09277		94.25	-0.04272
			94.25	-0.09399		94.25	-0.04456
			94.3125	-0.09277		94.375	-0.04456
			94.375	-0.09216		94.375	-0.04639
			94.4375	-0.08667		94.375	-0.05066
			94.5	-0.08484		94.5	-0.05188
			94.5	-0.08179		94.5	-0.05249
			94.5625	-0.07935		94.625	-0.05005
			94.625	-0.07446		94.625	-0.04822
			94.6875	-0.06958		94.625	-0.047
			94.75	-0.06409		94.75	-0.04272
			94.75	-0.05981		94.75	-0.0415
			94.8125	-0.05554		94.875	-0.0415
			94.875	-0.05066		94.875	-0.04333
			94.9375	-0.04883		94.875	-0.05005
			95	-0.047		95	-0.05249
			95	-0.04761		95	-0.05798
			95.0625	-0.04761		95.125	-0.05981
			95.125	-0.04822		95.125	-0.06165
			95.1875	-0.04761		95.125	-0.06409
			95.25	-0.05371		95.25	-0.06226
			95.25	-0.05554		95.25	-0.06287
			95.3125	-0.05737		95.375	-0.06165
			95.375	-0.06226		95.375	-0.05798
			95.4375	-0.0647		95.375	-0.05249
			95.5	-0.06714		95.5	-0.04944
			95.5	-0.06836		95.5	-0.047
			95.5625	-0.06775		95.625	-0.04517
			95.625	-0.06775		95.625	-0.04517
			95.6875	-0.06531		95.625	-0.04028
			95.75	-0.06287		95.75	-0.0415
			95.75	-0.05676		95.75	-0.04028
			95.8125	-0.05493		95.875	-0.03784
			95.875	-0.05493		95.875	-0.03296
			95.9375	-0.05615		95.875	-0.02625
			96	-0.05554		96	-0.02441
			96	-0.05737		96	-0.02197
			96.0625	-0.06042		96.125	-0.02014
			96.125	-0.0647		96.125	-0.01709
			96.1875	-0.0708		96.125	-0.01465
			96.25	-0.07385		96.25	-0.01221
			96.25	-0.08301		96.25	-0.00916
			96.3125	-0.08972		96.375	-0.00671
			96.375	-0.09766		96.375	-0.00427
			96.4375	-0.10193		96.375	-0.00427
			96.5	-0.10864		96.5	-0.00122
			96.5	-0.11108		96.5	0.00061
			96.5625	-0.1178		96.625	0.00244
			96.625	-0.12024		96.625	0.00244
			96.6875	-0.12268		96.625	0.00305
			96.75	-0.12451		96.75	0.00732
			96.75	-0.12634		96.75	0.01282
			96.8125	-0.12512		96.875	0.01587
			96.875	-0.12451		96.875	0.01709
			96.9375	-0.12268		96.875	0.01648
			97	-0.12268		97	0.01587
			97	-0.12146		97	0.01831
			97.0625	-0.1178		97.125	0.01892
			97.125	-0.11292		97.125	0.01587
			97.1875	-0.11292		97.125	0.01587
			97.25	-0.11047		97.25	0.0177
			97.25	-0.1123		97.25	0.01526
			97.3125	-0.11108		97.375	0.01587
			97.375	-0.11169		97.375	0.01038
			97.4375	-0.1123		97.375	0.00977
			97.5	-0.11353		97.5	0.00977
			97.5	-0.11292		97.5	0.00977
			97.5625	-0.11108		97.625	0.01282
			97.625	-0.10986		97.625	0.01465
			97.6875	-0.10803		97.625	0.01953
			97.75	-0.10559		97.75	0.02197
			97.75	-0.10071		97.75	0.02625
			97.8125	-0.09766		97.875	0.0293
			97.875	-0.09399		97.875	0.03296
			97.9375	-0.08972		97.875	0.03296
			98	-0.08606		98	0.03174
			98	-0.08301		98	0.02747
			98.0625	-0.0824		98.125	0.0238
			98.125	-0.0824		98.125	0.02563
			98.1875	-0.07874		98.125	0.02075
			98.25	-0.07324		98.25	0.01343
			98.25	-0.06714		98.25	0.00183
			98.3125	-0.06104		98.375	-0.00671
			98.375	-0.05432		98.375	-0.01282
			98.4375	-0.04944		98.375	-0.01709
			98.5	-0.04272		98.5	-0.02197
			98.5	-0.03784		98.5	-0.02563
			98.5625	-0.03418		98.625	-0.02625
			98.625	-0.03113		98.625	-0.02869
			98.6875	-0.02686		98.625	-0.02563
			98.75	-0.0238		98.75	-0.02625
			98.75	-0.01953		98.75	-0.02625
			98.8125	-0.01648		98.875	-0.03052
			98.875	-0.01099		98.875	-0.03174
			98.9375	-0.00488		98.875	-0.03479
			99	0		99	-0.04028
			99	0.00488		99	-0.04517
			99.0625	0.0116		99.125	-0.05432
			99.125	0.01587		99.125	-0.06165
			99.1875	0.01648		99.125	-0.06958
			99.25	0.01099		99.25	-0.0708
			99.25	0.00854		99.25	-0.07263
			99.3125	0.00549		99.375	-0.07507
			99.375	-0.00122		99.375	-0.07874
			99.4375	-0.00488		99.375	-0.07996
			99.5	-0.00671		99.5	-0.07874
			99.5	-0.00793		99.5	-0.07874
			99.5625	-0.00122		99.625	-0.07874
			99.625	-0.00122		99.625	-0.08118
			99.6875	0.00061		99.625	-0.08179
			99.75	0		99.75	-0.08423
			99.75	-0.00061		99.75	-0.08301
[truncated: 98,004 more rows]

## Sheet:  C
Figure 4-figure supplement 1 C i			Figure 4-figure supplement 1 C ii
			acsf			RR
Time (min)	Firing rate (Hz)		Time (ms)	voltage (mv)		Time (ms)	voltage (mv)
0.3	1.94444		0	-0.0354004		0	0.00976562
0.6	2.05556		0.0625	-0.0366211		0.0625	0.00732422
0.9	2.05556		0.125	-0.0354004		0.125	0.00488281
1.2	2.05556		0.1875	-0.0311279		0.125	0.00366211
1.5	2.11111		0.1875	-0.0262451		0.1875	0.00610352
1.8	2		0.25	-0.0244141		0.25	0.00671387
2.1	2.05556		0.3125	-0.0231934		0.3125	0.00610352
2.4	2.05556		0.375	-0.0201416		0.375	0.00488281
2.7	2.11111		0.4375	-0.0158691		0.375	0.00488281
3	2.05556		0.4375	-0.0115967		0.4375	0.00488281
3.3	2.11111		0.5	-0.00793457		0.5	0.00305176
3.6	2.05556		0.5625	-0.00732422		0.5625	0.00305176
3.9	2.11111		0.625	-0.00366211		0.625	0.0012207
4.2	2.11111		0.6875	-0.00427246		0.625	0
4.5	2.05556		0.6875	-0.00305176		0.6875	0.0012207
4.8	2.05556		0.75	-0.00244141		0.75	0.0012207
5.1	1.94444		0.8125	-0.00549316		0.8125	0.0012207
5.4	1.94444		0.875	-0.00549316		0.875	0.0012207
5.7	2		0.9375	-0.00427246		0.875	-0.0012207
6	2.05556		0.9375	-0.00366211		0.9375	-0.00488281
6.3	2		1	0.00183106		1	-0.00793457
6.6	1.94444		1.0625	0.00610352		1.0625	-0.0146484
6.9	2		1.125	0.00793457		1.125	-0.0189209
7.2	2		1.1875	0.00976562		1.125	-0.0280762
7.5	2		1.1875	0.00854492		1.1875	-0.0390625
7.8	2		1.25	0.0134277		1.25	-0.0457764
8.1	2		1.3125	0.0152588		1.3125	-0.0537109
8.4	2		1.375	0.012207		1.375	-0.0579834
8.7	2.05556		1.4375	0.010376		1.375	-0.0640869
9	2		1.4375	0.00610352		1.4375	-0.0695801
9.3	2.05556		1.5	0.00488281		1.5	-0.0732422
9.6	2.05556		1.5625	0.00488281		1.5625	-0.0762939
9.9	2.05556		1.625	0.00183106		1.625	-0.0793457
10.2	1.88889		1.6875	0		1.625	-0.0811768
10.5	1.77778		1.6875	-0.00244141		1.6875	-0.0848389
10.8	1.77778		1.75	-0.000610352		1.75	-0.0848389
11.1	1.66667		1.8125	0.0012207		1.8125	-0.0872803
11.4	1.55556		1.875	0.00244141		1.875	-0.0897217
11.7	1.61111		1.9375	0.00183106		1.875	-0.0921631
12	1.5		1.9375	0.00427246		1.9375	-0.0946045
12.3	1.55556		2	0.00244141		2	-0.098877
12.6	1.44444		2.0625	0.00488281		2.0625	-0.102539
12.9	1.44444		2.125	0.00244141		2.125	-0.10437
13.2	1.44444		2.1875	0.00610352		2.125	-0.106201
13.5	1.5		2.1875	0.00488281		2.1875	-0.105591
13.8	1.5		2.25	0.00549316		2.25	-0.10437
14.1	1.44444		2.3125	0.00305176		2.3125	-0.10376
14.4	1.38889		2.375	0.00244141		2.375	-0.101929
14.7	1.5		2.4375	0.00488281		2.375	-0.100098
15	1.38889		2.4375	0.0012207		2.4375	-0.098877
15.3	1.44444		2.5	-0.00488281		2.5	-0.100708
15.6	1.44444		2.5625	-0.010376		2.5625	-0.10437
15.9	1.33333		2.625	-0.0140381		2.625	-0.107422
16.2	1.38889		2.6875	-0.0164795		2.625	-0.106812
16.5	1.38889		2.6875	-0.0195312		2.6875	-0.108032
16.8	1.61111		2.75	-0.0244141		2.75	-0.109253
17.1	1.72222		2.8125	-0.0274658		2.8125	-0.108032
17.4	1.83333		2.875	-0.0286865		2.875	-0.106812
17.7	2		2.9375	-0.0286865		2.875	-0.101929
18	2.11111		2.9375	-0.0292969		2.9375	-0.0994873
18.3	2.11111		3	-0.0311279		3	-0.0970459
18.6	2.05556		3.0625	-0.0317383		3.0625	-0.0939941
18.9	2.11111		3.125	-0.0305176		3.125	-0.0933838
19.2	2.11111		3.1875	-0.0311279		3.125	-0.0964355
19.5	2.16667		3.1875	-0.0280762		3.1875	-0.0964355
19.8	2.05556		3.25	-0.0299072		3.25	-0.101318
20.1	2.16667		3.3125	-0.0268555		3.3125	-0.103149
20.4	2.11111		3.375	-0.0286865		3.375	-0.108032
20.7	2.16667		3.4375	-0.0299072		3.375	-0.113525
21	2.22222		3.4375	-0.0311279		3.4375	-0.117188
21.3	2.11111		3.5	-0.0311279		3.5	-0.122681
21.6	2.11111		3.5625	-0.0335693		3.5625	-0.123901
21.9	2.11111		3.625	-0.03479		3.625	-0.126953
22.2	2.11111		3.6875	-0.0372314		3.625	-0.132446
22.5	2.11111		3.6875	-0.0390625		3.6875	-0.131226
22.8	2.11111		3.75	-0.03479		3.75	-0.129395
23.1	2.11111		3.8125	-0.0360107		3.8125	-0.126343
23.4	2.11111		3.875	-0.0378418		3.875	-0.123901
23.7	2.11111		3.9375	-0.0421143		3.875	-0.12146
24	2.11111		3.9375	-0.0402832		3.9375	-0.116577
24.3	2.11111		4	-0.0421143		4	-0.112915
24.6	2.11111		4.0625	-0.043335		4.0625	-0.108643
24.9	2.05556		4.125	-0.0476074		4.125	-0.103149
25.2	2.05556		4.1875	-0.0518799		4.125	-0.0994873
25.5	2.05556		4.1875	-0.0500488		4.1875	-0.0927734
25.8	2.11111		4.25	-0.0524902		4.25	-0.0897217
26.1	2		4.3125	-0.0506592		4.3125	-0.0830078
26.4	2.11111		4.375	-0.0494385		4.375	-0.0793457
26.7	2.05556		4.4375	-0.0476074		4.375	-0.0762939
27	2.05556		4.4375	-0.0445557		4.4375	-0.0738525
27.3	2.11111		4.5	-0.0439453		4.5	-0.0744629
27.6	2.05556		4.5625	-0.0390625		4.5625	-0.0738525
27.9	2.11111		4.625	-0.0366211		4.625	-0.0708008
28.2	2.11111		4.6875	-0.0317383		4.625	-0.0701904
28.5	2.05556		4.6875	-0.0323486		4.6875	-0.067749
28.8	2.11111		4.75	-0.0317383		4.75	-0.0683594
29.1	2.27778		4.8125	-0.0311279		4.8125	-0.067749
29.4	2.22222		4.875	-0.0292969		4.875	-0.0653076
29.7	2.22222		4.9375	-0.0305176		4.875	-0.0665283
30	2.16667		4.9375	-0.0341797		4.9375	-0.0646973
			5	-0.0384521		5	-0.0646973
			5.0625	-0.0408936		5.0625	-0.0640869
			5.125	-0.0390625		5.125	-0.0640869
			5.1875	-0.0390625		5.125	-0.0646973
			5.1875	-0.0372314		5.1875	-0.065918
			5.25	-0.0366211		5.25	-0.0665283
			5.3125	-0.0341797		5.3125	-0.0701904
			5.375	-0.03479		5.375	-0.0695801
			5.4375	-0.0311279		5.375	-0.0701904
			5.4375	-0.0341797		5.4375	-0.0701904
			5.5	-0.0354004		5.5	-0.067749
			5.5625	-0.0384521		5.5625	-0.0640869
			5.625	-0.0427246		5.625	-0.0616455
			5.6875	-0.0408936		5.625	-0.0598145
			5.6875	-0.0445557		5.6875	-0.0592041
			5.75	-0.0415039		5.75	-0.0567627
			5.8125	-0.043335		5.8125	-0.0561523
			5.875	-0.0408936		5.875	-0.0585938
			5.9375	-0.0390625		5.875	-0.0610352
			5.9375	-0.0354004		5.9375	-0.0622559
			6	-0.032959		6	-0.0610352
			6.0625	-0.0335693		6.0625	-0.0622559
			6.125	-0.0311279		6.125	-0.0628662
			6.1875	-0.0292969		6.125	-0.0616455
			6.1875	-0.0262451		6.1875	-0.0610352
			6.25	-0.022583		6.25	-0.0592041
			6.3125	-0.0219727		6.3125	-0.0604248
			6.375	-0.0170898		6.375	-0.0598145
			6.4375	-0.0152588		6.375	-0.0622559
			6.4375	-0.00976562		6.4375	-0.0604248
			6.5	-0.00488281		6.5	-0.0585938
			6.5625	-0.00488281		6.5625	-0.057373
			6.625	-0.00305176		6.625	-0.0549316
			6.6875	-0.00244141		6.625	-0.0512695
			6.6875	-0.00183106		6.6875	-0.0488281
			6.75	0		6.75	-0.0457764
			6.8125	-0.000610352		6.8125	-0.0439453
			6.875	0.000610352		6.875	-0.0396729
			6.9375	0		6.875	-0.032959
			6.9375	0.0012207		6.9375	-0.032959
			7	0.00427246		7	-0.0292969
			7.0625	0.00732422		7.0625	-0.0280762
			7.125	0.0128174		7.125	-0.0268555
			7.1875	0.010376		7.125	-0.0274658
			7.1875	0.0109863		7.1875	-0.0299072
			7.25	0.00915527		7.25	-0.0323486
			7.3125	0.0109863		7.3125	-0.0341797
			7.375	0.0115967		7.375	-0.0341797
			7.4375	0.0115967		7.375	-0.0341797
			7.4375	0.0128174		7.4375	-0.0341797
			7.5	0.0128174		7.5	-0.0354004
			7.5625	0.0183105		7.5625	-0.03479
			7.625	0.0195312		7.625	-0.0372314
			7.6875	0.0213623		7.625	-0.0384521
			7.6875	0.0201416		7.6875	-0.0427246
			7.75	0.0201416		7.75	-0.045166
			7.8125	0.0195312		7.8125	-0.0469971
			7.875	0.0201416		7.875	-0.0494385
			7.9375	0.020752		7.875	-0.0537109
			7.9375	0.0183105		7.9375	-0.0549316
			8	0.0201416		8	-0.0561523
			8.0625	0.0201416		8.0625	-0.0579834
			8.125	0.020752		8.125	-0.0616455
			8.1875	0.0219727		8.125	-0.0640869
			8.1875	0.0219727		8.1875	-0.0701904
			8.25	0.0213623		8.25	-0.0726318
			8.3125	0.0183105		8.3125	-0.0775146
			8.375	0.0158691		8.375	-0.0830078
			8.4375	0.0140381		8.375	-0.0854492
			8.4375	0.0158691		8.4375	-0.088501
			8.5	0.012207		8.5	-0.0891113
			8.5625	0.0115967		8.5625	-0.0939941
			8.625	0.010376		8.625	-0.0964355
			8.6875	0.0134277		8.625	-0.098877
			8.6875	0.0152588		8.6875	-0.0970459
			8.75	0.0128174		8.75	-0.100708
			8.8125	0.00793457		8.8125	-0.101318
			8.875	0.00366211		8.875	-0.105591
			8.9375	0.00183106		8.875	-0.106201
			8.9375	0		8.9375	-0.108643
			9	-0.000610352		9	-0.111084
			9.0625	-0.00610352		9.0625	-0.115356
			9.125	-0.00854492		9.125	-0.118408
			9.1875	-0.012207		9.125	-0.12085
			9.1875	-0.0152588		9.1875	-0.124512
			9.25	-0.0170898		9.25	-0.126953
			9.3125	-0.0231934		9.3125	-0.130005
			9.375	-0.0250244		9.375	-0.128174
			9.4375	-0.0311279		9.375	-0.129395
			9.4375	-0.0360107		9.4375	-0.128784
			9.5	-0.0396729		9.5	-0.131226
			9.5625	-0.043335		9.5625	-0.131226
			9.625	-0.0494385		9.625	-0.131226
			9.6875	-0.055542		9.625	-0.131226
			9.6875	-0.0604248		9.6875	-0.133667
			9.75	-0.0646973		9.75	-0.133057
			9.8125	-0.0640869		9.8125	-0.130615
			9.875	-0.0671387		9.875	-0.130005
			9.9375	-0.0689697		9.875	-0.129395
			9.9375	-0.0738525		9.9375	-0.130005
			10	-0.0726318		10	-0.131226
			10.0625	-0.0756836		10.0625	-0.129395
			10.125	-0.0775146		10.125	-0.131226
			10.1875	-0.0823975		10.125	-0.133057
			10.1875	-0.088501		10.1875	-0.136108
			10.25	-0.0891113		10.25	-0.134277
			10.3125	-0.0946045		10.3125	-0.135498
			10.375	-0.0976562		10.375	-0.133667
			10.4375	-0.10376		10.375	-0.134277
			10.4375	-0.106812		10.4375	-0.130615
			10.5	-0.112305		10.5	-0.126953
			10.5625	-0.116577		10.5625	-0.123901
			10.625	-0.118408		10.625	-0.120239
			10.6875	-0.12085		10.625	-0.117188
			10.6875	-0.123291		10.6875	-0.108643
			10.75	-0.126343		10.75	-0.10376
			10.8125	-0.128784		10.8125	-0.098877
			10.875	-0.131226		10.875	-0.0939941
			10.9375	-0.128784		10.875	-0.0872803
			10.9375	-0.133057		10.9375	-0.0836182
			11	-0.134888		11	-0.0775146
			11.0625	-0.137329		11.0625	-0.0750732
			11.125	-0.137329		11.125	-0.0708008
			11.1875	-0.134888		11.125	-0.0653076
			11.1875	-0.137329		11.1875	-0.0616455
			11.25	-0.140991		11.25	-0.0561523
			11.3125	-0.145874		11.3125	-0.0506592
			11.375	-0.147705		11.375	-0.0476074
			11.4375	-0.151367		11.375	-0.0408936
			11.4375	-0.151978		11.4375	-0.0366211
			11.5	-0.153809		11.5	-0.0311279
			11.5625	-0.151367		11.5625	-0.0268555
			11.625	-0.147705		11.625	-0.0195312
			11.6875	-0.142212		11.625	-0.0164795
			11.6875	-0.134277		11.6875	-0.0134277
			11.75	-0.128784		11.75	-0.0134277
			11.8125	-0.119019		11.8125	-0.00854492
			11.875	-0.115356		11.875	-0.00854492
			11.9375	-0.109863		11.875	-0.00366211
			11.9375	-0.106812		11.9375	-0.00244141
			12	-0.101929		12	0.0012207
			12.0625	-0.0994873		12.0625	0.00671387
			12.125	-0.0994873		12.125	0.00915527
			12.1875	-0.0994873		12.125	0.010376
			12.1875	-0.100098		12.1875	0.0134277
			12.25	-0.0952148		12.25	0.0152588
			12.3125	-0.0964355		12.3125	0.0158691
			12.375	-0.0982666		12.375	0.0146484
			12.4375	-0.100708		12.375	0.0134277
			12.4375	-0.0994873		12.4375	0.00915527
			12.5	-0.100708		12.5	0.00915527
			12.5625	-0.100708		12.5625	0.00427246
			12.625	-0.10376		12.625	0
			12.6875	-0.106201		12.625	-0.00610352
			12.6875	-0.10376		12.6875	-0.00793457
			12.75	-0.10498		12.75	-0.012207
			12.8125	-0.101318		12.8125	-0.012207
			12.875	-0.100708		12.875	-0.0134277
			12.9375	-0.0994873		12.875	-0.0128174
			12.9375	-0.0964355		12.9375	-0.00854492
			13	-0.0939941		13	-0.00976562
			13.0625	-0.0933838		13.0625	-0.00976562
			13.125	-0.0891113		13.125	-0.010376
			13.1875	-0.0878906		13.125	-0.0164795
			13.1875	-0.090332		13.1875	-0.0170898
			13.25	-0.0921631		13.25	-0.0238037
			13.3125	-0.0964355		13.3125	-0.0299072
			13.375	-0.0939941		13.375	-0.0396729
			13.4375	-0.0976562		13.375	-0.0476074
			13.4375	-0.100098		13.4375	-0.057373
			13.5	-0.101929		13.5	-0.0640869
			13.5625	-0.100708		13.5625	-0.0695801
			13.625	-0.0970459		13.625	-0.0671387
			13.6875	-0.0952148		13.625	-0.065918
			13.6875	-0.0939941		13.6875	-0.0610352
			13.75	-0.0921631		13.75	-0.0561523
			13.8125	-0.0897217		13.8125	-0.0512695
			13.875	-0.0866699		13.875	-0.045166
			13.9375	-0.0805664		13.875	-0.0427246
			13.9375	-0.0769043		13.9375	-0.0415039
			14	-0.0732422		14	-0.0390625
			14.0625	-0.0695801		14.0625	-0.0390625
			14.125	-0.0653076		14.125	-0.0372314
			14.1875	-0.0628662		14.125	-0.0378418
			14.1875	-0.0598145		14.1875	-0.0372314
			14.25	-0.0604248		14.25	-0.0354004
			14.3125	-0.0610352		14.3125	-0.0323486
			14.375	-0.0622559		14.375	-0.0323486
			14.4375	-0.0634766		14.375	-0.0317383
			14.4375	-0.0628662		14.4375	-0.03479
			14.5	-0.0622559		14.5	-0.0335693
			14.5625	-0.0640869		14.5625	-0.0335693
			14.625	-0.0628662		14.625	-0.0341797
			14.6875	-0.0622559		14.625	-0.0360107
			14.6875	-0.0604248		14.6875	-0.0366211
			14.75	-0.0567627		14.75	-0.0360107
			14.8125	-0.0592041		14.8125	-0.0366211
			14.875	-0.0598145		14.875	-0.0390625
			14.9375	-0.0628662		14.875	-0.0427246
			14.9375	-0.0622559		14.9375	-0.0445557
			15	-0.0622559		15	-0.0469971
			15.0625	-0.0646973		15.0625	-0.0537109
			15.125	-0.0671387		15.125	-0.0585938
			15.1875	-0.0689697		15.125	-0.0616455
			15.1875	-0.0701904		15.1875	-0.065918
			15.25	-0.0689697		15.25	-0.0665283
			15.3125	-0.0720215		15.3125	-0.0689697
			15.375	-0.0738525		15.375	-0.0695801
			15.4375	-0.0750732		15.375	-0.0646973
			15.4375	-0.078125		15.4375	-0.0640869
			15.5	-0.0793457		15.5	-0.0616455
			15.5625	-0.0787354		15.5625	-0.0604248
			15.625	-0.0762939		15.625	-0.0585938
			15.6875	-0.0750732		15.625	-0.057373
			15.6875	-0.0720215		15.6875	-0.0561523
			15.75	-0.067749		15.75	-0.057373
			15.8125	-0.0616455		15.8125	-0.0567627
			15.875	-0.0561523		15.875	-0.0543213
			15.9375	-0.0531006		15.875	-0.0549316
			15.9375	-0.0543213		15.9375	-0.0561523
			16	-0.0543213		16	-0.0579834
			16.0625	-0.0543213		16.0625	-0.057373
			16.125	-0.055542		16.125	-0.0561523
			16.1875	-0.0592041		16.125	-0.0537109
			16.1875	-0.0646973		16.1875	-0.0476074
			16.25	-0.0683594		16.25	-0.0439453
			16.3125	-0.0689697		16.3125	-0.0354004
			16.375	-0.0708008		16.375	-0.0323486
			16.4375	-0.0714111		16.375	-0.0280762
			16.4375	-0.0744629		16.4375	-0.0268555
			16.5	-0.0756836		16.5	-0.0244141
			16.5625	-0.078125		16.5625	-0.0231934
			16.625	-0.0805664		16.625	-0.0256348
			16.6875	-0.0805664		16.625	-0.0286865
			16.6875	-0.0836182		16.6875	-0.0323486
			16.75	-0.0848389		16.75	-0.0323486
			16.8125	-0.0872803		16.8125	-0.0354004
			16.875	-0.0866699		16.875	-0.0378418
			16.9375	-0.0854492		16.875	-0.0390625
			16.9375	-0.0811768		16.9375	-0.0384521
			17	-0.0842285		17	-0.0408936
			17.0625	-0.0860596		17.0625	-0.0408936
			17.125	-0.090332		17.125	-0.0469971
			17.1875	-0.0921631		17.125	-0.0506592
			17.1875	-0.0927734		17.1875	-0.0506592
			17.25	-0.0982666		17.25	-0.0549316
			17.3125	-0.108032		17.3125	-0.055542
			17.375	-0.112305		17.375	-0.0567627
			17.4375	-0.114746		17.375	-0.0549316
			17.4375	-0.118408		17.4375	-0.0524902
			17.5	-0.123291		17.5	-0.0512695
			17.5625	-0.127563		17.5625	-0.0488281
			17.625	-0.131836		17.625	-0.0469971
			17.6875	-0.134277		17.625	-0.0427246
			17.6875	-0.136108		17.6875	-0.0427246
			17.75	-0.136108		17.75	-0.045166
			17.8125	-0.137939		17.8125	-0.0457764
			17.875	-0.13855		17.875	-0.045166
			17.9375	-0.139771		17.875	-0.0427246
			17.9375	-0.139771		17.9375	-0.0415039
			18	-0.139771		18	-0.0408936
			18.0625	-0.137939		18.0625	-0.0384521
			18.125	-0.136719		18.125	-0.0360107
			18.1875	-0.13855		18.125	-0.0335693
			18.1875	-0.137939		18.1875	-0.0311279
			18.25	-0.137329		18.25	-0.0274658
			18.3125	-0.130615		18.3125	-0.022583
			18.375	-0.130615		18.375	-0.0183105
			18.4375	-0.130615		18.375	-0.0134277
			18.4375	-0.131836		18.4375	-0.00976562
			18.5	-0.129395		18.5	-0.00427246
			18.5625	-0.130005		18.5625	0.000610352
			18.625	-0.129395		18.625	0.00366211
			18.6875	-0.133057		18.625	0.00488281
			18.6875	-0.134888		18.6875	0.00732422
			18.75	-0.134277		18.75	0.0115967
			18.8125	-0.131836		18.8125	0.0140381
			18.875	-0.129395		18.875	0.0158691
			18.9375	-0.125122		18.875	0.0140381
			18.9375	-0.122681		18.9375	0.0183105
			19	-0.117798		19	0.0213623
			19.0625	-0.115356		19.0625	0.020752
			19.125	-0.110474		19.125	0.0213623
			19.1875	-0.106201		19.125	0.0201416
			19.1875	-0.100098		19.1875	0.0250244
			19.25	-0.0976562		19.25	0.0274658
			19.3125	-0.0909424		19.3125	0.0299072
			19.375	-0.0848389		19.375	0.0323486
			19.4375	-0.0726318		19.375	0.0323486
			19.4375	-0.0653076		19.4375	0.0354004
			19.5	-0.0604248		19.5	0.0390625
			19.5625	-0.057373		19.5625	0.0427246
			19.625	-0.0524902		19.625	0.0457764
			19.6875	-0.0457764		19.625	0.0500488
			19.6875	-0.0421143		19.6875	0.0524902
			19.75	-0.0384521		19.75	0.0524902
			19.8125	-0.03479		19.8125	0.0537109
			19.875	-0.0274658		19.875	0.0543213
			19.9375	-0.020752		19.875	0.0549316
			19.9375	-0.0146484		19.9375	0.0524902
			20	-0.010376		20	0.0488281
			20.0625	-0.00915527		20.0625	0.0457764
			20.125	-0.00549316		20.125	0.0439453
			20.1875	-0.00366211		20.125	0.0402832
			20.1875	-0.0012207		20.1875	0.0335693
			20.25	0.000610352		20.25	0.0292969
			20.3125	0.00366211		20.3125	0.0231934
			20.375	0.00244141		20.375	0.0219727
			20.4375	0.00305176		20.375	0.0152588
			20.4375	0.00244141		20.4375	0.010376
			20.5	0.00732422		20.5	0.00366211
			20.5625	0.00854492		20.5625	0
			20.625	0.00915527		20.625	-0.00427246
			20.6875	0.010376		20.625	-0.00915527
			20.6875	0.0140381		20.6875	-0.0140381
			20.75	0.0201416		20.75	-0.0183105
			20.8125	0.022583		20.8125	-0.0244141
			20.875	0.0219727		20.875	-0.0323486
			20.9375	0.0219727		20.875	-0.0378418
			20.9375	0.0231934		20.9375	-0.0463867
			21	0.0250244		21	-0.0512695
			21.0625	0.0286865		21.0625	-0.0585938
			21.125	0.0280762		21.125	-0.0634766
			21.1875	0.0280762		21.125	-0.0646973
			21.1875	0.0317383		21.1875	-0.0634766
			21.25	0.0299072		21.25	-0.0610352
			21.3125	0.0305176		21.3125	-0.0598145
			21.375	0.0286865		21.375	-0.0567627
			21.4375	0.0256348		21.375	-0.0543213
			21.4375	0.022583		21.4375	-0.0518799
			21.5	0.020752		21.5	-0.0524902
			21.5625	0.0158691		21.5625	-0.0567627
			21.625	0.0152588		21.625	-0.0628662
			21.6875	0.0140381		21.625	-0.0689697
			21.6875	0.010376		21.6875	-0.0708008
			21.75	0.00732422		21.75	-0.0756836
			21.8125	0.00610352		21.8125	-0.0787354
			21.875	0.00610352		21.875	-0.0836182
			21.9375	0.00366211		21.875	-0.0848389
			21.9375	0.00183106		21.9375	-0.0866699
			22	-0.0012207		22	-0.0848389
			22.0625	-0.00244141		22.0625	-0.0830078
			22.125	-0.00183106		22.125	-0.0811768
			22.1875	-0.00427246		22.125	-0.0805664
			22.1875	-0.00610352		22.1875	-0.0799561
			22.25	-0.00854492		22.25	-0.0793457
			22.3125	-0.010376		22.3125	-0.0811768
			22.375	-0.0115967		22.375	-0.0805664
			22.4375	-0.0134277		22.375	-0.0860596
			22.4375	-0.0158691		22.4375	-0.0866699
			22.5	-0.0213623		22.5	-0.0897217
			22.5625	-0.0244141		22.5625	-0.0909424
			22.625	-0.0286865		22.625	-0.0921631
			22.6875	-0.0311279		22.625	-0.0976562
			22.6875	-0.032959		22.6875	-0.100708
			22.75	-0.0341797		22.75	-0.106201
			22.8125	-0.0384521		22.8125	-0.105591
			22.875	-0.0408936		22.875	-0.108032
			22.9375	-0.0445557		22.875	-0.109863
			22.9375	-0.0476074		22.9375	-0.112305
			23	-0.0506592		23	-0.111694
			23.0625	-0.0561523		23.0625	-0.112305
			23.125	-0.0585938		23.125	-0.110474
			23.1875	-0.0567627		23.125	-0.109253
			23.1875	-0.0561523		23.1875	-0.111084
			23.25	-0.0518799		23.25	-0.106201
			23.3125	-0.0506592		23.3125	-0.108032
			23.375	-0.0518799		23.375	-0.10498
			23.4375	-0.0531006		23.375	-0.10376
			23.4375	-0.0518799		23.4375	-0.101929
			23.5	-0.0549316		23.5	-0.101929
			23.5625	-0.0567627		23.5625	-0.10498
			23.625	-0.0616455		23.625	-0.108032
			23.6875	-0.0616455		23.625	-0.109253
			23.6875	-0.0634766		23.6875	-0.109253
			23.75	-0.0622559		23.75	-0.109253
			23.8125	-0.0616455		23.8125	-0.110474
			23.875	-0.0604248		23.875	-0.113525
			23.9375	-0.0592041		23.875	-0.110474
			23.9375	-0.0592041		23.9375	-0.111084
			24	-0.055542		24	-0.111084
			24.0625	-0.0531006		24.0625	-0.111694
			24.125	-0.0476074		24.125	-0.111084
			24.1875	-0.0445557		24.125	-0.106812
			24.1875	-0.0415039		24.1875	-0.105591
			24.25	-0.0390625		24.25	-0.101318
			24.3125	-0.0384521		24.3125	-0.102539
			24.375	-0.0360107		24.375	-0.098877
			24.4375	-0.0402832		24.375	-0.098877
			24.4375	-0.045166		24.4375	-0.0964355
			24.5	-0.0500488		24.5	-0.0933838
			24.5625	-0.0488281		24.5625	-0.0909424
			24.625	-0.0518799		24.625	-0.0878906
			24.6875	-0.0524902		24.625	-0.0872803
			24.6875	-0.0561523		24.6875	-0.0866699
			24.75	-0.0585938		24.75	-0.0860596
			24.8125	-0.057373		24.8125	-0.0811768
			24.875	-0.0592041		24.875	-0.0836182
			24.9375	-0.0598145		24.875	-0.0805664
			24.9375	-0.0616455		24.9375	-0.0805664
			25	-0.0622559		25	-0.0756836
			25.0625	-0.0622559		25.0625	-0.0714111
			25.125	-0.0616455		25.125	-0.0708008
			25.1875	-0.0579834		25.125	-0.0695801
			25.1875	-0.055542		25.1875	-0.0695801
			25.25	-0.0549316		25.25	-0.0671387
			25.3125	-0.0537109		25.3125	-0.0671387
			25.375	-0.0543213		25.375	-0.065918
			25.4375	-0.0531006		25.375	-0.0671387
			25.4375	-0.0488281		25.4375	-0.065918
			25.5	-0.0482178		25.5	-0.0671387
			25.5625	-0.0469971		25.5625	-0.0640869
			25.625	-0.0482178		25.625	-0.0665283
			25.6875	-0.0463867		25.625	-0.067749
			25.6875	-0.0482178		25.6875	-0.0665283
			25.75	-0.0524902		25.75	-0.0695801
			25.8125	-0.0598145		25.8125	-0.0701904
			25.875	-0.067749		25.875	-0.0708008
			25.9375	-0.0671387		25.875	-0.0695801
			25.9375	-0.0701904		25.9375	-0.067749
			26	-0.0695801		26	-0.067749
			26.0625	-0.0701904		26.0625	-0.0695801
			26.125	-0.0714111		26.125	-0.0683594
			26.1875	-0.0683594		26.125	-0.0671387
			26.1875	-0.0653076		26.1875	-0.0708008
			26.25	-0.0616455		26.25	-0.0756836
			26.3125	-0.0592041		26.3125	-0.0769043
			26.375	-0.0561523		26.375	-0.0793457
			26.4375	-0.0549316		26.375	-0.0769043
			26.4375	-0.0543213		26.4375	-0.0750732
			26.5	-0.0549316		26.5	-0.0738525
			26.5625	-0.0531006		26.5625	-0.0695801
			26.625	-0.0512695		26.625	-0.0640869
			26.6875	-0.0518799		26.625	-0.0598145
			26.6875	-0.0500488		26.6875	-0.0598145
			26.75	-0.0476074		26.75	-0.0616455
			26.8125	-0.0427246		26.8125	-0.0634766
			26.875	-0.0415039		26.875	-0.0671387
			26.9375	-0.0390625		26.875	-0.0708008
			26.9375	-0.0372314		26.9375	-0.0701904
			27	-0.0323486		27	-0.0708008
			27.0625	-0.0268555		27.0625	-0.0653076
			27.125	-0.0219727		27.125	-0.0628662
			27.1875	-0.0201416		27.125	-0.0598145
			27.1875	-0.0164795		27.1875	-0.0543213
			27.25	-0.010376		27.25	-0.0500488
			27.3125	-0.00732422		27.3125	-0.0476074
			27.375	-0.0012207		27.375	-0.0494385
			27.4375	0.00305176		27.375	-0.0531006
			27.4375	0.00793457		27.4375	-0.0561523
			27.5	0.0109863		27.5	-0.0561523
			27.5625	0.0134277		27.5625	-0.0610352
			27.625	0.0152588		27.625	-0.0634766
			27.6875	0.0189209		27.625	-0.0671387
			27.6875	0.0238037		27.6875	-0.065918
			27.75	0.0244141		27.75	-0.0640869
			27.8125	0.0274658		27.8125	-0.0616455
			27.875	0.0280762		27.875	-0.0634766
			27.9375	0.0323486		27.875	-0.0616455
			27.9375	0.0323486		27.9375	-0.0598145
			28	0.0323486		28	-0.0579834
			28.0625	0.0317383		28.0625	-0.0579834
			28.125	0.0323486		28.125	-0.0579834
			28.1875	0.0354004		28.125	-0.0592041
			28.1875	0.03479		28.1875	-0.0610352
			28.25	0.03479		28.25	-0.0646973
			28.3125	0.0317383		28.3125	-0.0665283
			28.375	0.0335693		28.375	-0.0689697
			28.4375	0.0335693		28.375	-0.0726318
			28.4375	0.0341797		28.4375	-0.0769043
			28.5	0.0354004		28.5	-0.0823975
			28.5625	0.032959		28.5625	-0.0866699
			28.625	0.0354004		28.625	-0.0872803
			28.6875	0.0341797		28.625	-0.0909424
			28.6875	0.0311279		28.6875	-0.0958252
			28.75	0.0268555		28.75	-0.101318
			28.8125	0.020752		28.8125	-0.107422
			28.875	0.012207		28.875	-0.108032
			28.9375	0.00488281		28.875	-0.112915
			28.9375	-0.00305176		28.9375	-0.116577
			29	-0.00732422		29	-0.122681
			29.0625	-0.00854492		29.0625	-0.123291
			29.125	-0.0134277		29.125	-0.128784
			29.1875	-0.0128174		29.125	-0.128784
			29.1875	-0.0128174		29.1875	-0.131836
			29.25	-0.010376		29.25	-0.133667
			29.3125	-0.0115967		29.3125	-0.134888
			29.375	-0.0152588		29.375	-0.136108
			29.4375	-0.0219727		29.375	-0.136108
			29.4375	-0.0286865		29.4375	-0.137939
			29.5	-0.0335693		29.5	-0.137329
			29.5625	-0.0402832		29.5625	-0.140381
			29.625	-0.0469971		29.625	-0.142212
			29.6875	-0.0543213		29.625	-0.143433
			29.6875	-0.0561523		29.6875	-0.140991
			29.75	-0.0610352		29.75	-0.13916
			29.8125	-0.0616455		29.8125	-0.139771
			29.875	-0.0640869		29.875	-0.13916
			29.9375	-0.0646973		29.875	-0.140381
			29.9375	-0.0671387		29.9375	-0.140991
			30	-0.0695801		30	-0.140381
			30.0625	-0.0708008		30.0625	-0.140381
			30.125	-0.0708008		30.125	-0.140381
			30.1875	-0.0683594		30.125	-0.13916
			30.1875	-0.0714111		30.1875	-0.136719
			30.25	-0.0738525		30.25	-0.134277
			30.3125	-0.0769043		30.3125	-0.130615
			30.375	-0.078125		30.375	-0.130615
			30.4375	-0.0805664		30.375	-0.124512
			30.4375	-0.0836182		30.4375	-0.123901
			30.5	-0.088501		30.5	-0.118408
			30.5625	-0.090332		30.5625	-0.115356
			30.625	-0.088501		30.625	-0.110474
			30.6875	-0.090332		30.625	-0.106812
			30.6875	-0.088501		30.6875	-0.101929
			30.75	-0.0933838		30.75	-0.100098
			30.8125	-0.0946045		30.8125	-0.0939941
			30.875	-0.0970459		30.875	-0.0878906
			30.9375	-0.100098		30.875	-0.0842285
			30.9375	-0.103149		30.9375	-0.0805664
			31	-0.106812		31	-0.0762939
			31.0625	-0.109253		31.0625	-0.0689697
			31.125	-0.108032		31.125	-0.0610352
			31.1875	-0.106812		31.125	-0.055542
			31.1875	-0.103149		31.1875	-0.0482178
			31.25	-0.100098		31.25	-0.0439453
			31.3125	-0.0982666		31.3125	-0.03479
			31.375	-0.0927734		31.375	-0.0305176
			31.4375	-0.090332		31.375	-0.0274658
			31.4375	-0.0878906		31.4375	-0.0250244
			31.5	-0.0836182		31.5	-0.0201416
			31.5625	-0.0836182		31.5625	-0.0189209
			31.625	-0.0848389		31.625	-0.0140381
			31.6875	-0.0854492		31.625	-0.0134277
			31.6875	-0.0836182		31.6875	-0.0128174
			31.75	-0.0830078		31.75	-0.0109863
			31.8125	-0.0836182		31.8125	-0.0109863
			31.875	-0.0866699		31.875	-0.0109863
			31.9375	-0.0878906		31.875	-0.00732422
			31.9375	-0.0866699		31.9375	-0.00366211
			32	-0.0878906		32	-0.00244141
			32.0625	-0.090332		32.0625	-0.00244141
			32.125	-0.0915527		32.125	-0.00305176
			32.1875	-0.0909424		32.125	-0.00305176
			32.1875	-0.0915527		32.1875	-0.000610352
			32.25	-0.0891113		32.25	-0.00366211
			32.3125	-0.090332		32.3125	-0.00671387
			32.375	-0.0891113		32.375	-0.00854492
			32.4375	-0.088501		32.375	-0.00610352
			32.4375	-0.0897217		32.4375	-0.00488281
			32.5	-0.0891113		32.5	-0.0012207
			32.5625	-0.0891113		32.5625	-0.00305176
			32.625	-0.0860596		32.625	-0.000610352
			32.6875	-0.0836182		32.625	0.00183106
			32.6875	-0.0830078		32.6875	0.00549316
			32.75	-0.0787354		32.75	0.00732422
			32.8125	-0.0769043		32.8125	0.00671387
			32.875	-0.0714111		32.875	0.00549316
			32.9375	-0.0689697		32.875	0.00549316
			32.9375	-0.0708008		32.9375	0.0012207
			33	-0.0695801		33	0.000610352
			33.0625	-0.0683594		33.0625	-0.00427246
			33.125	-0.0689697		33.125	-0.00549316
			33.1875	-0.0701904		33.125	-0.00854492
			33.1875	-0.0738525		33.1875	-0.0115967
			33.25	-0.0775146		33.25	-0.0109863
			33.3125	-0.0775146		33.3125	-0.00915527
			33.375	-0.0805664		33.375	-0.012207
			33.4375	-0.0817871		33.375	-0.0115967
			33.4375	-0.0836182		33.4375	-0.0128174
			33.5	-0.0836182		33.5	-0.010376
			33.5625	-0.0817871		33.5625	-0.00671387
			33.625	-0.0817871		33.625	-0.00854492
			33.6875	-0.0793457		33.625	-0.0115967
			33.6875	-0.0762939		33.6875	-0.0146484
			33.75	-0.0738525		33.75	-0.0170898
			33.8125	-0.0750732		33.8125	-0.0170898
			33.875	-0.0750732		33.875	-0.0201416
			33.9375	-0.0744629		33.875	-0.022583
			33.9375	-0.0720215		33.9375	-0.0231934
			34	-0.0720215		34	-0.0213623
			34.0625	-0.0726318		34.0625	-0.0189209
			34.125	-0.0738525		34.125	-0.0177002
			34.1875	-0.0738525		34.125	-0.0158691
			34.1875	-0.0714111		34.1875	-0.0152588
			34.25	-0.0732422		34.25	-0.0152588
			34.3125	-0.0744629		34.3125	-0.0170898
			34.375	-0.078125		34.375	-0.0152588
			34.4375	-0.0756836		34.375	-0.0152588
			34.4375	-0.0762939		34.4375	-0.0152588
			34.5	-0.0738525		34.5	-0.0195312
			34.5625	-0.0732422		34.5625	-0.0201416
			34.625	-0.0732422		34.625	-0.0231934
			34.6875	-0.0714111		34.625	-0.0219727
			34.6875	-0.0708008		34.6875	-0.0250244
			34.75	-0.0726318		34.75	-0.0299072
			34.8125	-0.0750732		34.8125	-0.0335693
			34.875	-0.0775146		34.875	-0.0360107
			34.9375	-0.0817871		34.875	-0.03479
			34.9375	-0.0836182		34.9375	-0.03479
			35	-0.0854492		35	-0.0378418
			35.0625	-0.0823975		35.0625	-0.0408936
			35.125	-0.0817871		35.125	-0.0390625
			35.1875	-0.0817871		35.125	-0.0415039
			35.1875	-0.0842285		35.1875	-0.0408936
			35.25	-0.0836182		35.25	-0.0427246
			35.3125	-0.0830078		35.3125	-0.0421143
			35.375	-0.0842285		35.375	-0.0396729
			35.4375	-0.0878906		35.375	-0.0396729
			35.4375	-0.0878906		35.4375	-0.0366211
			35.5	-0.0860596		35.5	-0.0384521
			35.5625	-0.0817871		35.5625	-0.0366211
			35.625	-0.0787354		35.625	-0.0378418
			35.6875	-0.0756836		35.625	-0.0390625
			35.6875	-0.0756836		35.6875	-0.0390625
			35.75	-0.0732422		35.75	-0.0372314
			35.8125	-0.0732422		35.8125	-0.0390625
			35.875	-0.0750732		35.875	-0.0421143
			35.9375	-0.0769043		35.875	-0.045166
			35.9375	-0.078125		35.9375	-0.0482178
			36	-0.0805664		36	-0.0445557
			36.0625	-0.0823975		36.0625	-0.045166
			36.125	-0.0842285		36.125	-0.0463867
			36.1875	-0.0866699		36.125	-0.045166
			36.1875	-0.0842285		36.1875	-0.0427246
			36.25	-0.0878906		36.25	-0.0408936
			36.3125	-0.090332		36.3125	-0.0390625
			36.375	-0.0927734		36.375	-0.0396729
			36.4375	-0.0939941		36.375	-0.0421143
			36.4375	-0.0958252		36.4375	-0.0402832
			36.5	-0.0982666		36.5	-0.043335
			36.5625	-0.10437		36.5625	-0.0396729
			36.625	-0.105591		36.625	-0.0390625
			36.6875	-0.106812		36.625	-0.0384521
			36.6875	-0.109863		36.6875	-0.0360107
			36.75	-0.114136		36.75	-0.03479
			36.8125	-0.117798		36.8125	-0.0341797
			36.875	-0.119019		36.875	-0.0335693
			36.9375	-0.119019		36.875	-0.0354004
			36.9375	-0.119629		36.9375	-0.0396729
			37	-0.120239		37	-0.0445557
			37.0625	-0.12207		37.0625	-0.0500488
			37.125	-0.12085		37.125	-0.0506592
			37.1875	-0.122681		37.125	-0.0518799
			37.1875	-0.123291		37.1875	-0.0543213
			37.25	-0.123291		37.25	-0.055542
			37.3125	-0.12207		37.3125	-0.0567627
			37.375	-0.123901		37.375	-0.0524902
			37.4375	-0.125122		37.375	-0.0512695
			37.4375	-0.125122		37.4375	-0.0500488
			37.5	-0.126343		37.5	-0.0488281
			37.5625	-0.124512		37.5625	-0.0457764
			37.625	-0.125732		37.625	-0.043335
			37.6875	-0.128174		37.625	-0.0360107
			37.6875	-0.128174		37.6875	-0.0335693
			37.75	-0.130615		37.75	-0.0299072
			37.8125	-0.131836		37.8125	-0.0274658
			37.875	-0.133057		37.875	-0.0268555
			37.9375	-0.135498		37.875	-0.020752
			37.9375	-0.134888		37.9375	-0.0164795
			38	-0.132446		38	-0.0128174
			38.0625	-0.133057		38.0625	-0.012207
			38.125	-0.134888		38.125	-0.00793457
			38.1875	-0.137939		38.125	-0.00488281
			38.1875	-0.140381		38.1875	-0.0012207
			38.25	-0.140991		38.25	0
			38.3125	-0.142822		38.3125	-0.00305176
			38.375	-0.142822		38.375	-0.00488281
			38.4375	-0.142212		38.375	-0.00732422
			38.4375	-0.140381		38.4375	-0.00671387
			38.5	-0.141602		38.5	-0.00610352
			38.5625	-0.13916		38.5625	-0.00732422
			38.625	-0.140991		38.625	-0.00549316
			38.6875	-0.137939		38.625	-0.00610352
			38.6875	-0.141602		38.6875	-0.00305176
			38.75	-0.140381		38.75	0.00183106
			38.8125	-0.140381		38.8125	0.00366211
			38.875	-0.137329		38.875	0.00366211
			38.9375	-0.133057		38.875	0.00610352
			38.9375	-0.128784		38.9375	0.00549316
			39	-0.123291		39	0.00793457
			39.0625	-0.114746		39.0625	0.0115967
			39.125	-0.10498		39.125	0.0158691
			39.1875	-0.0994873		39.125	0.020752
			39.1875	-0.0915527		39.1875	0.0256348
			39.25	-0.0848389		39.25	0.0299072
			39.3125	-0.0805664		39.3125	0.0378418
			39.375	-0.0744629		39.375	0.0415039
			39.4375	-0.0701904		39.375	0.0415039
			39.4375	-0.0640869		39.4375	0.0408936
			39.5	-0.0610352		39.5	0.0390625
			39.5625	-0.0579834		39.5625	0.0378418
			39.625	-0.057373		39.625	0.0335693
			39.6875	-0.0561523		39.625	0.0286865
			39.6875	-0.055542		39.6875	0.020752
			39.75	-0.055542		39.75	0.0158691
			39.8125	-0.0561523		39.8125	0.012207
			39.875	-0.0543213		39.875	0.00915527
			39.9375	-0.0531006		39.875	0.00610352
			39.9375	-0.0500488		39.9375	-0.000610352
			40	-0.0476074		40	-0.00305176
			40.0625	-0.0457764		40.0625	-0.00549316
			40.125	-0.0469971		40.125	-0.00732422
			40.1875	-0.045166		40.125	-0.00915527
			40.1875	-0.0402832		40.1875	-0.0115967
			40.25	-0.0366211		40.25	-0.010376
			40.3125	-0.0341797		40.3125	-0.0128174
			40.375	-0.0305176		40.375	-0.0115967
			40.4375	-0.0311279		40.375	-0.00793457
			40.4375	-0.0238037		40.4375	-0.00244141
			40.5	-0.0219727		40.5	-0.00305176
			40.5625	-0.0164795		40.5625	-0.00244141
			40.625	-0.0134277		40.625	-0.00305176
			40.6875	-0.00915527		40.625	-0.0012207
			40.6875	-0.00610352		40.6875	0.00183106
			40.75	-0.00183106		40.75	-0.000610352
			40.8125	-0.000610352		40.8125	-0.00366211
			40.875	0.00366211		40.875	-0.00488281
			40.9375	0.00610352		40.875	-0.00549316
			40.9375	0.00610352		40.9375	-0.00549316
			41	0.00793457		41	-0.00793457
			41.0625	0.00610352		41.0625	-0.0140381
			41.125	0.00793457		41.125	-0.0177002
			41.1875	0.00732422		41.125	-0.0213623
			41.1875	0.00427246		41.1875	-0.0262451
			41.25	0.00366211		41.25	-0.0305176
			41.3125	0.00183106		41.3125	-0.0390625
			41.375	0.00305176		41.375	-0.0445557
			41.4375	0		41.375	-0.0512695
			41.4375	-0.00366211		41.4375	-0.057373
			41.5	-0.00793457		41.5	-0.0604248
			41.5625	-0.00976562		41.5625	-0.0634766
			41.625	-0.0115967		41.625	-0.0634766
			41.6875	-0.010376		41.625	-0.0683594
			41.6875	-0.0134277		41.6875	-0.0701904
			41.75	-0.0140381		41.75	-0.0689697
			41.8125	-0.0128174		41.8125	-0.0671387
			41.875	-0.0146484		41.875	-0.067749
			41.9375	-0.0158691		41.875	-0.0671387
			41.9375	-0.0189209		41.9375	-0.0689697
			42	-0.0183105		42	-0.065918
			42.0625	-0.0201416		42.0625	-0.0634766
			42.125	-0.0195312		42.125	-0.0646973
			42.1875	-0.0189209		42.125	-0.067749
			42.1875	-0.0170898		42.1875	-0.0726318
			42.25	-0.0146484		42.25	-0.0732422
			42.3125	-0.0140381		42.3125	-0.0756836
			42.375	-0.0152588		42.375	-0.078125
			42.4375	-0.0146484		42.375	-0.0836182
			42.4375	-0.0164795		42.4375	-0.0860596
			42.5	-0.0177002		42.5	-0.0866699
			42.5625	-0.020752		42.5625	-0.088501
			42.625	-0.0231934		42.625	-0.0878906
			42.6875	-0.0231934		42.625	-0.0878906
			42.6875	-0.0213623		42.6875	-0.0878906
			42.75	-0.022583		42.75	-0.0897217
			42.8125	-0.022583		42.8125	-0.088501
			42.875	-0.0262451		42.875	-0.090332
			42.9375	-0.0262451		42.875	-0.0891113
			42.9375	-0.0274658		42.9375	-0.0915527
			43	-0.0311279		43	-0.0921631
			43.0625	-0.032959		43.0625	-0.0939941
			43.125	-0.03479		43.125	-0.0958252
			43.1875	-0.0341797		43.125	-0.0915527
			43.1875	-0.0341797		43.1875	-0.0921631
			43.25	-0.0372314		43.25	-0.0939941
			43.3125	-0.0366211		43.3125	-0.0958252
			43.375	-0.0360107		43.375	-0.0958252
			43.4375	-0.0378418		43.375	-0.0946045
			43.4375	-0.0372314		43.4375	-0.0958252
			43.5	-0.0372314		43.5	-0.100098
			43.5625	-0.0372314		43.5625	-0.100098
			43.625	-0.03479		43.625	-0.100098
			43.6875	-0.0372314		43.625	-0.0976562
			43.6875	-0.0378418		43.6875	-0.0933838
			43.75	-0.0384521		43.75	-0.0909424
			43.8125	-0.0378418		43.8125	-0.0866699
			43.875	-0.0366211		43.875	-0.0842285
			43.9375	-0.0378418		43.875	-0.0805664
			43.9375	-0.0372314		43.9375	-0.0793457
			44	-0.0378418		44	-0.0793457
			44.0625	-0.0366211		44.0625	-0.0793457
			44.125	-0.0396729		44.125	-0.0817871
			44.1875	-0.0402832		44.125	-0.0817871
			44.1875	-0.0415039		44.1875	-0.0823975
			44.25	-0.0421143		44.25	-0.0799561
			44.3125	-0.0402832		44.3125	-0.078125
			44.375	-0.0415039		44.375	-0.0775146
			44.4375	-0.0396729		44.375	-0.0769043
			44.4375	-0.0384521		44.4375	-0.0726318
			44.5	-0.0372314		44.5	-0.0665283
			44.5625	-0.0341797		44.5625	-0.0610352
			44.625	-0.0335693		44.625	-0.0598145
			44.6875	-0.0317383		44.625	-0.0579834
			44.6875	-0.0268555		44.6875	-0.055542
			44.75	-0.0268555		44.75	-0.0543213
			44.8125	-0.0274658		44.8125	-0.0524902
			44.875	-0.0280762		44.875	-0.0543213
			44.9375	-0.0311279		44.875	-0.055542
			44.9375	-0.0323486		44.9375	-0.0531006
			45	-0.0372314		45	-0.0543213
			45.0625	-0.0427246		45.0625	-0.0549316
			45.125	-0.0476074		45.125	-0.0549316
			45.1875	-0.0482178		45.125	-0.0592041
			45.1875	-0.0531006		45.1875	-0.0592041
			45.25	-0.057373		45.25	-0.0634766
			45.3125	-0.0622559		45.3125	-0.0683594
			45.375	-0.0665283		45.375	-0.0701904
			45.4375	-0.0683594		45.375	-0.0726318
			45.4375	-0.0738525		45.4375	-0.0775146
			45.5	-0.0750732		45.5	-0.0805664
			45.5625	-0.078125		45.5625	-0.0823975
			45.625	-0.0750732		45.625	-0.0817871
			45.6875	-0.0726318		45.625	-0.0805664
			45.6875	-0.0689697		45.6875	-0.0817871
			45.75	-0.0653076		45.75	-0.0823975
			45.8125	-0.0604248		45.8125	-0.0830078
			45.875	-0.0537109		45.875	-0.0775146
			45.9375	-0.0500488		45.875	-0.0738525
			45.9375	-0.0457764		45.9375	-0.0683594
			46	-0.0427246		46	-0.0634766
			46.0625	-0.0384521		46.0625	-0.057373
			46.125	-0.0360107		46.125	-0.0500488
			46.1875	-0.0341797		46.125	-0.045166
			46.1875	-0.032959		46.1875	-0.0415039
			46.25	-0.0299072		46.25	-0.0408936
			46.3125	-0.0280762		46.3125	-0.0372314
			46.375	-0.0244141		46.375	-0.0384521
			46.4375	-0.0231934		46.375	-0.0384521
			46.4375	-0.0201416		46.4375	-0.0390625
			46.5	-0.0140381		46.5	-0.0396729
			46.5625	-0.0164795		46.5625	-0.0408936
			46.625	-0.0134277		46.625	-0.0421143
			46.6875	-0.0140381		46.625	-0.043335
			46.6875	-0.0109863		46.6875	-0.045166
			46.75	-0.00793457		46.75	-0.0427246
			46.8125	-0.00366211		46.8125	-0.0463867
			46.875	0.00183106		46.875	-0.0482178
			46.9375	0.00488281		46.875	-0.0494385
			46.9375	0.0109863		46.9375	-0.0463867
			47	0.0140381		47	-0.043335
			47.0625	0.0170898		47.0625	-0.0439453
			47.125	0.0201416		47.125	-0.0463867
			47.1875	0.0250244		47.125	-0.0469971
			47.1875	0.0280762		47.1875	-0.0476074
			47.25	0.0286865		47.25	-0.0482178
			47.3125	0.0311279		47.3125	-0.0518799
			47.375	0.0305176		47.375	-0.0549316
			47.4375	0.0311279		47.375	-0.0579834
			47.4375	0.0286865		47.4375	-0.0616455
			47.5	0.0256348		47.5	-0.0634766
			47.5625	0.0250244		47.5625	-0.0671387
			47.625	0.0219727		47.625	-0.0695801
			47.6875	0.0219727		47.625	-0.0720215
			47.6875	0.0213623		47.6875	-0.0750732
			47.75	0.020752		47.75	-0.078125
			47.8125	0.020752		47.8125	-0.0799561
			47.875	0.0213623		47.875	-0.0811768
			47.9375	0.0250244		47.875	-0.0836182
			47.9375	0.0256348		47.9375	-0.0878906
			48	0.0274658		48	-0.0897217
			48.0625	0.0268555		48.0625	-0.0921631
			48.125	0.0280762		48.125	-0.0909424
			48.1875	0.0268555		48.125	-0.0933838
			48.1875	0.0238037		48.1875	-0.0982666
			48.25	0.0238037		48.25	-0.103149
			48.3125	0.0238037		48.3125	-0.10376
			48.375	0.0195312		48.375	-0.106201
			48.4375	0.0170898		48.375	-0.108643
			48.4375	0.0140381		48.4375	-0.113525
			48.5	0.0109863		48.5	-0.115356
			48.5625	0.00976562		48.5625	-0.115356
			48.625	0.00671387		48.625	-0.115356
			48.6875	0.00549316		48.625	-0.113525
			48.6875	0.00732422		48.6875	-0.115967
			48.75	0.00793457		48.75	-0.114746
			48.8125	0.00976562		48.8125	-0.115356
			48.875	0.00732422		48.875	-0.112305
			48.9375	0.00732422		48.875	-0.109253
			48.9375	0.00732422		48.9375	-0.10498
			49	0.00366211		49	-0.103149
			49.0625	0		49.0625	-0.101929
			49.125	-0.00671387		49.125	-0.10376
			49.1875	-0.010376		49.125	-0.10376
			49.1875	-0.0152588		49.1875	-0.10376
			49.25	-0.0213623		49.25	-0.106201
			49.3125	-0.0311279		49.3125	-0.111084
			49.375	-0.0378418		49.375	-0.112915
			49.4375	-0.0427246		49.375	-0.113525
			49.4375	-0.0488281		49.4375	-0.112305
			49.5	-0.0537109		49.5	-0.112305
			49.5625	-0.0592041		49.5625	-0.113525
			49.625	-0.0622559		49.625	-0.112915
			49.6875	-0.0646973		49.625	-0.106201
			49.6875	-0.0683594		49.6875	-0.10376
			49.75	-0.0738525		49.75	-0.0976562
			49.8125	-0.0775146		49.8125	-0.0964355
			49.875	-0.0811768		49.875	-0.0976562
			49.9375	-0.0848389		49.875	-0.0964355
			49.9375	-0.0909424		49.9375	-0.0994873
			50	-0.0970459		50	-0.100098
			50.0625	-0.101318		50.0625	-0.101929
			50.125	-0.10437		50.125	-0.10437
			50.1875	-0.108032		50.125	-0.110474
			50.1875	-0.111694		50.1875	-0.112915
			50.25	-0.114136		50.25	-0.116577
			50.3125	-0.113525		50.3125	-0.116577
			50.375	-0.112305		50.375	-0.119019
			50.4375	-0.111084		50.375	-0.12085
			50.4375	-0.111694		50.4375	-0.122681
			50.5	-0.111694		50.5	-0.12085
			50.5625	-0.111084		50.5625	-0.116577
			50.625	-0.112305		50.625	-0.112915
			50.6875	-0.115967		50.625	-0.111084
			50.6875	-0.119019		50.6875	-0.108643
			50.75	-0.119019		50.75	-0.101929
			50.8125	-0.122681		50.8125	-0.0958252
			50.875	-0.124512		50.875	-0.0897217
			50.9375	-0.123901		50.875	-0.0848389
			50.9375	-0.124512		50.9375	-0.0836182
			51	-0.120239		51	-0.0769043
			51.0625	-0.12146		51.0625	-0.0744629
			51.125	-0.12207		51.125	-0.0701904
			51.1875	-0.119629		51.125	-0.067749
			51.1875	-0.117188		51.1875	-0.0640869
			51.25	-0.116577		51.25	-0.0604248
			51.3125	-0.117188		51.3125	-0.057373
			51.375	-0.116577		51.375	-0.055542
			51.4375	-0.115356		51.375	-0.0500488
			51.4375	-0.113525		51.4375	-0.045166
			51.5	-0.114746		51.5	-0.043335
			51.5625	-0.113525		51.5625	-0.0421143
			51.625	-0.113525		51.625	-0.0372314
			51.6875	-0.108032		51.625	-0.032959
			51.6875	-0.10498		51.6875	-0.0286865
			51.75	-0.10437		51.75	-0.0280762
			51.8125	-0.101929		51.8125	-0.0262451
			51.875	-0.100098		51.875	-0.0244141
			51.9375	-0.0976562		51.875	-0.0201416
			51.9375	-0.0982666		51.9375	-0.0195312
			52	-0.098877		52	-0.0189209
			52.0625	-0.100708		52.0625	-0.0201416
			52.125	-0.0994873		52.125	-0.0164795
			52.1875	-0.0976562		52.125	-0.0140381
			52.1875	-0.0982666		52.1875	-0.0115967
			52.25	-0.0964355		52.25	-0.012207
			52.3125	-0.0915527		52.3125	-0.010376
			52.375	-0.0872803		52.375	-0.0109863
			52.4375	-0.0836182		52.375	-0.00915527
			52.4375	-0.0787354		52.4375	-0.00915527
			52.5	-0.0762939		52.5	-0.00854492
			52.5625	-0.0689697		52.5625	-0.00915527
			52.625	-0.067749		52.625	-0.0134277
			52.6875	-0.065918		52.625	-0.0170898
			52.6875	-0.0640869		52.6875	-0.0177002
			52.75	-0.0622559		52.75	-0.0195312
			52.8125	-0.0585938		52.8125	-0.0164795
			52.875	-0.0585938		52.875	-0.0189209
			52.9375	-0.0561523		52.875	-0.0201416
			52.9375	-0.055542		52.9375	-0.0201416
			53	-0.0524902		53	-0.0183105
			53.0625	-0.0506592		53.0625	-0.0195312
			53.125	-0.0488281		53.125	-0.0201416
			53.1875	-0.0494385		53.125	-0.0238037
			53.1875	-0.0457764		53.1875	-0.0213623
			53.25	-0.0488281		53.25	-0.0213623
			53.3125	-0.0524902		53.3125	-0.0195312
			53.375	-0.0567627		53.375	-0.0201416
			53.4375	-0.0628662		53.375	-0.022583
			53.4375	-0.0640869		53.4375	-0.0219727
			53.5	-0.0683594		53.5	-0.0250244
			53.5625	-0.0701904		53.5625	-0.0268555
			53.625	-0.0720215		53.625	-0.0280762
			53.6875	-0.0708008		53.625	-0.0323486
			53.6875	-0.0708008		53.6875	-0.0317383
			53.75	-0.0695801		53.75	-0.0341797
			53.8125	-0.0720215		53.8125	-0.03479
			53.875	-0.0720215		53.875	-0.0372314
			53.9375	-0.0714111		53.875	-0.0354004
			53.9375	-0.0726318		53.9375	-0.0396729
			54	-0.0738525		54	-0.0402832
			54.0625	-0.0756836		54.0625	-0.0427246
			54.125	-0.0750732		54.125	-0.0415039
			54.1875	-0.078125		54.125	-0.0427246
			54.1875	-0.0793457		54.1875	-0.043335
			54.25	-0.0823975		54.25	-0.0457764
			54.3125	-0.0817871		54.3125	-0.0469971
			54.375	-0.0817871		54.375	-0.045166
			54.4375	-0.0817871		54.375	-0.0445557
			54.4375	-0.0805664		54.4375	-0.0427246
			54.5	-0.0799561		54.5	-0.0390625
			54.5625	-0.078125		54.5625	-0.0360107
			54.625	-0.0762939		54.625	-0.0317383
			54.6875	-0.0750732		54.625	-0.0305176
			54.6875	-0.0750732		54.6875	-0.0250244
			54.75	-0.0744629		54.75	-0.0250244
			54.8125	-0.0744629		54.8125	-0.0238037
			54.875	-0.0701904		54.875	-0.0238037
			54.9375	-0.0701904		54.875	-0.0238037
			54.9375	-0.065918		54.9375	-0.0256348
			55	-0.0604248		55	-0.0268555
			55.0625	-0.0610352		55.0625	-0.0299072
			55.125	-0.0604248		55.125	-0.0317383
			55.1875	-0.0616455		55.125	-0.0311279
			55.1875	-0.0616455		55.1875	-0.0323486
			55.25	-0.0628662		55.25	-0.0274658
			55.3125	-0.0646973		55.3125	-0.0280762
			55.375	-0.0665283		55.375	-0.0274658
			55.4375	-0.065918		55.375	-0.0256348
			55.4375	-0.0653076		55.4375	-0.0262451
			55.5	-0.065918		55.5	-0.0256348
			55.5625	-0.065918		55.5625	-0.0280762
			55.625	-0.065918		55.625	-0.032959
			55.6875	-0.0646973		55.625	-0.0372314
			55.6875	-0.0628662		55.6875	-0.0390625
			55.75	-0.0610352		55.75	-0.0439453
			55.8125	-0.0604248		55.8125	-0.0469971
			55.875	-0.0610352		55.875	-0.0506592
			55.9375	-0.0628662		55.875	-0.0549316
			55.9375	-0.0634766		55.9375	-0.0567627
			56	-0.065918		56	-0.0604248
			56.0625	-0.0701904		56.0625	-0.0604248
			56.125	-0.0714111		56.125	-0.0622559
			56.1875	-0.0726318		56.125	-0.0604248
			56.1875	-0.0744629		56.1875	-0.0604248
			56.25	-0.0732422		56.25	-0.0604248
			56.3125	-0.0769043		56.3125	-0.0610352
			56.375	-0.0769043		56.375	-0.0622559
			56.4375	-0.0805664		56.375	-0.0646973
			56.4375	-0.0811768		56.4375	-0.0665283
			56.5	-0.0799561		56.5	-0.0653076
			56.5625	-0.0787354		56.5625	-0.0634766
			56.625	-0.078125		56.625	-0.0592041
			56.6875	-0.0756836		56.625	-0.055542
			56.6875	-0.0762939		56.6875	-0.0531006
			56.75	-0.0762939		56.75	-0.0494385
			56.8125	-0.0769043		56.8125	-0.0402832
			56.875	-0.0787354		56.875	-0.0372314
			56.9375	-0.0830078		56.875	-0.0311279
			56.9375	-0.0872803		56.9375	-0.0299072
			57	-0.0909424		57	-0.0274658
			57.0625	-0.0933838		57.0625	-0.0213623
			57.125	-0.0964355		57.125	-0.0219727
			57.1875	-0.0976562		57.125	-0.0195312
			57.1875	-0.0976562		57.1875	-0.0201416
			57.25	-0.098877		57.25	-0.0183105
			57.3125	-0.101318		57.3125	-0.0189209
			57.375	-0.10376		57.375	-0.0219727
			57.4375	-0.107422		57.375	-0.0219727
			57.4375	-0.109863		57.4375	-0.0238037
			57.5	-0.112915		57.5	-0.0238037
			57.5625	-0.116577		57.5625	-0.0262451
			57.625	-0.117798		57.625	-0.0274658
			57.6875	-0.12146		57.625	-0.0268555
			57.6875	-0.12085		57.6875	-0.0244141
			57.75	-0.125122		57.75	-0.0250244
			57.8125	-0.126953		57.8125	-0.0250244
			57.875	-0.131836		57.875	-0.0250244
			57.9375	-0.130615		57.875	-0.0213623
			57.9375	-0.132446		57.9375	-0.0219727
			58	-0.130615		58	-0.0201416
			58.0625	-0.131226		58.0625	-0.0213623
			58.125	-0.128784		58.125	-0.0231934
			58.1875	-0.123291		58.125	-0.0195312
			58.1875	-0.119629		58.1875	-0.0189209
			58.25	-0.117188		58.25	-0.0164795
			58.3125	-0.112915		58.3125	-0.0170898
			58.375	-0.109863		58.375	-0.0170898
			58.4375	-0.10498		58.375	-0.0164795
			58.4375	-0.103149		58.4375	-0.0170898
			58.5	-0.102539		58.5	-0.0183105
			58.5625	-0.103149		58.5625	-0.0189209
			58.625	-0.101929		58.625	-0.0164795
			58.6875	-0.10498		58.625	-0.0177002
			58.6875	-0.10498		58.6875	-0.0152588
			58.75	-0.108643		58.75	-0.0134277
			58.8125	-0.106812		58.8125	-0.0109863
			58.875	-0.108032		58.875	-0.00854492
			58.9375	-0.106201		58.875	-0.00915527
			58.9375	-0.10437		58.9375	-0.00915527
			59	-0.098877		59	-0.010376
			59.0625	-0.0939941		59.0625	-0.00732422
			59.125	-0.0872803		59.125	-0.00915527
			59.1875	-0.0817871		59.125	-0.00915527
			59.1875	-0.0762939		59.1875	-0.00915527
			59.25	-0.0665283		59.25	-0.00488281
			59.3125	-0.0628662		59.3125	0.0012207
			59.375	-0.0592041		59.375	0.00793457
			59.4375	-0.0598145		59.375	0.0140381
			59.4375	-0.0592041		59.4375	0.0195312
			59.5	-0.0592041		59.5	0.0256348
			59.5625	-0.0598145		59.5625	0.0292969
			59.625	-0.0604248		59.625	0.0305176
			59.6875	-0.0616455		59.625	0.0335693
			59.6875	-0.0604248		59.6875	0.0360107
			59.75	-0.0610352		59.75	0.0378418
			59.8125	-0.057373		59.8125	0.0396729
			59.875	-0.0524902		59.875	0.0408936
			59.9375	-0.0488281		59.875	0.0421143
			59.9375	-0.0445557		59.9375	0.0439453
			60	-0.0402832		60	0.0421143
			60.0625	-0.0354004		60.0625	0.0384521
			60.125	-0.0299072		60.125	0.0366211
			60.1875	-0.0219727		60.125	0.032959
			60.1875	-0.0195312		60.1875	0.0299072
			60.25	-0.0146484		60.25	0.0238037
			60.3125	-0.0146484		60.3125	0.0189209
			60.375	-0.0109863		60.375	0.0158691
			60.4375	-0.00976562		60.375	0.0152588
			60.4375	-0.00976562		60.4375	0.0140381
			60.5	-0.0109863		60.5	0.010376
			60.5625	-0.012207		60.5625	0.00549316
			60.625	-0.0109863		60.625	0.000610352
			60.6875	-0.0109863		60.625	-0.00305176
			60.6875	-0.0128174		60.6875	-0.00732422
			60.75	-0.012207		60.75	-0.012207
			60.8125	-0.00915527		60.8125	-0.0170898
			60.875	-0.00793457		60.875	-0.0201416
			60.9375	-0.00244141		60.875	-0.0244141
			60.9375	0.000610352		60.9375	-0.0299072
			61	0.00183106		61	-0.0341797
			61.0625	0.00732422		61.0625	-0.0378418
			61.125	0.00488281		61.125	-0.0421143
			61.1875	0.00793457		61.125	-0.0463867
			61.1875	0.00854492		61.1875	-0.0488281
			61.25	0.0115967		61.25	-0.0531006
			61.3125	0.0134277		61.3125	-0.0531006
			61.375	0.0140381		61.375	-0.0561523
			61.4375	0.0152588		61.375	-0.0604248
			61.4375	0.0177002		61.4375	-0.0622559
			61.5	0.020752		61.5	-0.065918
			61.5625	0.0201416		61.5625	-0.067749
			61.625	0.0183105		61.625	-0.0720215
			61.6875	0.0146484		61.625	-0.0769043
			61.6875	0.0146484		61.6875	-0.0799561
			61.75	0.012207		61.75	-0.0799561
			61.8125	0.0109863		61.8125	-0.0811768
			61.875	0.00793457		61.875	-0.0823975
			61.9375	0.00610352		61.875	-0.0817871
			61.9375	0.00549316		61.9375	-0.0805664
			62	0.00488281		62	-0.0799561
			62.0625	0.00305176		62.0625	-0.0817871
			62.125	0.00366211		62.125	-0.0848389
			62.1875	0.00183106		62.125	-0.090332
			62.1875	-0.000610352		62.1875	-0.0927734
			62.25	-0.00671387		62.25	-0.098877
			62.3125	-0.00915527		62.3125	-0.10437
			62.375	-0.0128174		62.375	-0.111084
			62.4375	-0.0134277		62.375	-0.114136
			62.4375	-0.0170898		62.4375	-0.118408
			62.5	-0.0201416		62.5	-0.122681
			62.5625	-0.0238037		62.5625	-0.125732
			62.625	-0.022583		62.625	-0.129395
			62.6875	-0.0256348		62.625	-0.130615
			62.6875	-0.0274658		62.6875	-0.134277
			62.75	-0.0305176		62.75	-0.137329
			62.8125	-0.0311279		62.8125	-0.139771
			62.875	-0.0299072		62.875	-0.140991
			62.9375	-0.0299072		62.875	-0.145264
			62.9375	-0.0299072		62.9375	-0.148926
			63	-0.0305176		63	-0.151978
			63.0625	-0.0292969		63.0625	-0.154419
			63.125	-0.0274658		63.125	-0.148926
			63.1875	-0.0262451		63.125	-0.148315
			63.1875	-0.0268555		63.1875	-0.141602
			63.25	-0.0256348		63.25	-0.136719
			63.3125	-0.0280762		63.3125	-0.133057
			63.375	-0.0305176		63.375	-0.128174
			63.4375	-0.032959		63.375	-0.123901
			63.4375	-0.0366211		63.4375	-0.120239
			63.5	-0.0378418		63.5	-0.116577
			63.5625	-0.0421143		63.5625	-0.114136
			63.625	-0.0421143		63.625	-0.112305
			63.6875	-0.0421143		63.625	-0.107422
			63.6875	-0.0402832		63.6875	-0.105591
			63.75	-0.0378418		63.75	-0.0970459
			63.8125	-0.0366211		63.8125	-0.0952148
			63.875	-0.0354004		63.875	-0.0909424
			63.9375	-0.032959		63.875	-0.0872803
			63.9375	-0.0280762		63.9375	-0.0817871
			64	-0.0268555		64	-0.0756836
			64.0625	-0.0268555		64.0625	-0.0726318
			64.125	-0.0280762		64.125	-0.0701904
			64.1875	-0.0299072		64.125	-0.067749
			64.1875	-0.0317383		64.1875	-0.0616455
			64.25	-0.0341797		64.25	-0.0628662
			64.3125	-0.0366211		64.3125	-0.0604248
			64.375	-0.0402832		64.375	-0.0634766
			64.4375	-0.0421143		64.375	-0.0622559
			64.4375	-0.0457764		64.4375	-0.0622559
			64.5	-0.045166		64.5	-0.0634766
			64.5625	-0.0469971		64.5625	-0.0653076
			64.625	-0.0494385		64.625	-0.067749
			64.6875	-0.0506592		64.625	-0.0665283
			64.6875	-0.0537109		64.6875	-0.0701904
			64.75	-0.0524902		64.75	-0.0714111
			64.8125	-0.0543213		64.8125	-0.0738525
			64.875	-0.0518799		64.875	-0.0726318
			64.9375	-0.0512695		64.875	-0.0720215
			64.9375	-0.055542		64.9375	-0.0720215
			65	-0.055542		65	-0.0714111
			65.0625	-0.057373		65.0625	-0.0689697
			65.125	-0.0567627		65.125	-0.065918
			65.1875	-0.0579834		65.125	-0.0653076
			65.1875	-0.0610352		65.1875	-0.065918
			65.25	-0.0622559		65.25	-0.0653076
			65.3125	-0.0616455		65.3125	-0.0622559
			65.375	-0.0622559		65.375	-0.0628662
			65.4375	-0.0634766		65.375	-0.0604248
			65.4375	-0.0653076		65.4375	-0.0640869
			65.5	-0.0665283		65.5	-0.065918
			65.5625	-0.0701904		65.5625	-0.065918
			65.625	-0.0720215		65.625	-0.0683594
			65.6875	-0.0756836		65.625	-0.0708008
			65.6875	-0.078125		65.6875	-0.0708008
			65.75	-0.0775146		65.75	-0.067749
			65.8125	-0.0805664		65.8125	-0.0628662
			65.875	-0.0805664		65.875	-0.0598145
			65.9375	-0.0817871		65.875	-0.0561523
			65.9375	-0.0811768		65.9375	-0.0494385
			66	-0.0823975		66	-0.045166
			66.0625	-0.0848389		66.0625	-0.0421143
			66.125	-0.0836182		66.125	-0.0421143
			66.1875	-0.0823975		66.125	-0.0408936
			66.1875	-0.0769043		66.1875	-0.0415039
			66.25	-0.0762939		66.25	-0.0421143
			66.3125	-0.0732422		66.3125	-0.0457764
			66.375	-0.0714111		66.375	-0.0500488
			66.4375	-0.0646973		66.375	-0.0531006
			66.4375	-0.0598145		66.4375	-0.0531006
			66.5	-0.0579834		66.5	-0.0537109
			66.5625	-0.0543213		66.5625	-0.0518799
			66.625	-0.0524902		66.625	-0.0500488
			66.6875	-0.045166		66.625	-0.0457764
			66.6875	-0.0415039		66.6875	-0.0421143
			66.75	-0.0402832		66.75	-0.0421143
			66.8125	-0.0390625		66.8125	-0.0415039
			66.875	-0.0378418		66.875	-0.0439453
			66.9375	-0.0360107		66.875	-0.043335
			66.9375	-0.0317383		66.9375	-0.0463867
			67	-0.0286865		67	-0.0500488
			67.0625	-0.0250244		67.0625	-0.0549316
			67.125	-0.0195312		67.125	-0.0567627
			67.1875	-0.0134277		67.125	-0.0634766
			67.1875	-0.00793457		67.1875	-0.067749
			67.25	-0.00305176		67.25	-0.0732422
			67.3125	0.00366211		67.3125	-0.0762939
			67.375	0.00549316		67.375	-0.0775146
			67.4375	0.00915527		67.375	-0.0787354
			67.4375	0.010376		67.4375	-0.0811768
			67.5	0.0158691		67.5	-0.0842285
			67.5625	0.0213623		67.5625	-0.0860596
			67.625	0.0238037		67.625	-0.0878906
			67.6875	0.0274658		67.625	-0.0909424
			67.6875	0.0292969		67.6875	-0.0933838
			67.75	0.0354004		67.75	-0.0927734
			67.8125	0.0384521		67.8125	-0.0915527
			67.875	0.0439453		67.875	-0.0915527
			67.9375	0.0476074		67.875	-0.0897217
			67.9375	0.0524902		67.9375	-0.0891113
			68	0.0579834		68	-0.0866699
			68.0625	0.0592041		68.0625	-0.0848389
			68.125	0.0616455		68.125	-0.0866699
			68.1875	0.0592041		68.125	-0.0848389
			68.1875	0.0598145		68.1875	-0.0842285
			68.25	0.0567627		68.25	-0.0830078
			68.3125	0.055542		68.3125	-0.0842285
			68.375	0.055542		68.375	-0.0854492
			68.4375	0.0543213		68.375	-0.0897217
			68.4375	0.0549316		68.4375	-0.088501
			68.5	0.0524902		68.5	-0.0933838
			68.5625	0.0494385		68.5625	-0.0933838
			68.625	0.0476074		68.625	-0.0964355
			68.6875	0.0482178		68.625	-0.0958252
			68.6875	0.0445557		68.6875	-0.0976562
			68.75	0.0415039		68.75	-0.098877
			68.8125	0.0372314		68.8125	-0.103149
			68.875	0.0354004		68.875	-0.106201
			68.9375	0.0360107		68.875	-0.107422
			68.9375	0.0323486		68.9375	-0.112305
			69	0.0280762		69	-0.114136
			69.0625	0.0213623		69.0625	-0.114136
			69.125	0.0177002		69.125	-0.112915
			69.1875	0.0115967		69.125	-0.111694
			69.1875	0.00732422		69.1875	-0.111084
			69.25	0		69.25	-0.112915
			69.3125	-0.00610352		69.3125	-0.113525
			69.375	-0.012207		69.375	-0.113525
			69.4375	-0.0195312		69.375	-0.115356
			69.4375	-0.0262451		69.4375	-0.117188
			69.5	-0.0323486		69.5	-0.119019
			69.5625	-0.0341797		69.5625	-0.119629
			69.625	-0.0402832		69.625	-0.12085
			69.6875	-0.0427246		69.625	-0.123291
			69.6875	-0.0463867		69.6875	-0.126343
			69.75	-0.0476074		69.75	-0.131836
			69.8125	-0.0506592		69.8125	-0.132446
			69.875	-0.055542		69.875	-0.139771
			69.9375	-0.0610352		69.875	-0.139771
			69.9375	-0.0646973		69.9375	-0.142822
			70	-0.065918		70	-0.139771
			70.0625	-0.0708008		70.0625	-0.137329
			70.125	-0.0762939		70.125	-0.132446
			70.1875	-0.0811768		70.125	-0.128174
			70.1875	-0.0836182		70.1875	-0.12207
			70.25	-0.0872803		70.25	-0.114136
			70.3125	-0.0897217		70.3125	-0.109253
			70.375	-0.0958252		70.375	-0.106201
			70.4375	-0.098877		70.375	-0.101929
			70.4375	-0.100708		70.4375	-0.098877
			70.5	-0.10376		70.5	-0.0946045
			70.5625	-0.107422		70.5625	-0.0946045
			70.625	-0.112305		70.625	-0.0939941
			70.6875	-0.114746		70.625	-0.0933838
			70.6875	-0.116577		70.6875	-0.0891113
			70.75	-0.119019		70.75	-0.088501
			70.8125	-0.12085		70.8125	-0.0811768
			70.875	-0.12207		70.875	-0.0762939
			70.9375	-0.12146		70.875	-0.0665283
			70.9375	-0.12207		70.9375	-0.0616455
			71	-0.125122		71	-0.0567627
			71.0625	-0.123291		71.0625	-0.0531006
			71.125	-0.120239		71.125	-0.0506592
			71.1875	-0.119019		71.125	-0.0518799
			71.1875	-0.116577		71.1875	-0.0537109
			71.25	-0.118408		71.25	-0.0543213
			71.3125	-0.116577		71.3125	-0.0537109
			71.375	-0.114136		71.375	-0.0524902
			71.4375	-0.114136		71.375	-0.0506592
			71.4375	-0.114746		71.4375	-0.0445557
			71.5	-0.115356		71.5	-0.0384521
			71.5625	-0.114136		71.5625	-0.032959
			71.625	-0.112305		71.625	-0.0268555
			71.6875	-0.109253		71.625	-0.0231934
			71.6875	-0.106812		71.6875	-0.0195312
			71.75	-0.101929		71.75	-0.0158691
			71.8125	-0.0982666		71.8125	-0.0115967
			71.875	-0.0933838		71.875	-0.00976562
			71.9375	-0.088501		71.875	-0.00671387
			71.9375	-0.0823975		71.9375	-0.00427246
			72	-0.0793457		72	-0.00183106
			72.0625	-0.0799561		72.0625	-0.0012207
			72.125	-0.0775146		72.125	-0.0012207
			72.1875	-0.0762939		72.125	-0.00183106
			72.1875	-0.0738525		72.1875	-0.00183106
			72.25	-0.0732422		72.25	-0.00183106
			72.3125	-0.0744629		72.3125	-0.00427246
			72.375	-0.0708008		72.375	-0.00732422
			72.4375	-0.0689697		72.375	-0.00976562
			72.4375	-0.0634766		72.4375	-0.0128174
			72.5	-0.0592041		72.5	-0.0134277
			72.5625	-0.0561523		72.5625	-0.0140381
			72.625	-0.0524902		72.625	-0.0134277
			72.6875	-0.0518799		72.625	-0.0146484
			72.6875	-0.0488281		72.6875	-0.0109863
			72.75	-0.0457764		72.75	-0.010376
			72.8125	-0.0457764		72.8125	-0.0109863
			72.875	-0.045166		72.875	-0.0115967
			72.9375	-0.0463867		72.875	-0.00976562
			72.9375	-0.0469971		72.9375	-0.00915527
			73	-0.0457764		73	-0.00671387
			73.0625	-0.0457764		73.0625	-0.00732422
			73.125	-0.0476074		73.125	-0.00366211
			73.1875	-0.0469971		73.125	-0.0012207
			73.1875	-0.0506592		73.1875	-0.00244141
			73.25	-0.0476074		73.25	-0.00427246
			73.3125	-0.0488281		73.3125	-0.00732422
			73.375	-0.0482178		73.375	-0.0134277
			73.4375	-0.0476074		73.375	-0.0158691
			73.4375	-0.0482178		73.4375	-0.022583
			73.5	-0.0476074		73.5	-0.0262451
			73.5625	-0.0476074		73.5625	-0.0317383
			73.625	-0.0482178		73.625	-0.03479
			73.6875	-0.0524902		73.625	-0.0390625
			73.6875	-0.057373		73.6875	-0.0445557
			73.75	-0.0640869		73.75	-0.0463867
			73.8125	-0.0634766		73.8125	-0.0488281
			73.875	-0.0671387		73.875	-0.0494385
			73.9375	-0.0683594		73.875	-0.0500488
			73.9375	-0.0714111		73.9375	-0.0488281
			74	-0.0714111		74	-0.0482178
			74.0625	-0.0708008		74.0625	-0.0421143
			74.125	-0.0689697		74.125	-0.0427246
			74.1875	-0.0646973		74.125	-0.0396729
			74.1875	-0.0628662		74.1875	-0.0378418
			74.25	-0.0567627		74.25	-0.0335693
			74.3125	-0.0567627		74.3125	-0.0311279
			74.375	-0.0531006		74.375	-0.0286865
			74.4375	-0.0531006		74.375	-0.0280762
			74.4375	-0.0524902		74.4375	-0.0274658
			74.5	-0.0537109		74.5	-0.0262451
			74.5625	-0.0531006		74.5625	-0.0268555
			74.625	-0.0561523		74.625	-0.0311279
			74.6875	-0.0561523		74.625	-0.0323486
			74.6875	-0.0561523		74.6875	-0.032959
			74.75	-0.0610352		74.75	-0.0317383
			74.8125	-0.0646973		74.8125	-0.0305176
			74.875	-0.0695801		74.875	-0.0292969
			74.9375	-0.067749		74.875	-0.0280762
			74.9375	-0.0671387		74.9375	-0.0262451
			75	-0.065918		75	-0.0299072
			75.0625	-0.0653076		75.0625	-0.0305176
			75.125	-0.0628662		75.125	-0.0341797
			75.1875	-0.0585938		75.125	-0.0366211
			75.1875	-0.055542		75.1875	-0.0390625
			75.25	-0.0543213		75.25	-0.045166
			75.3125	-0.0531006		75.3125	-0.0463867
			75.375	-0.0531006		75.375	-0.0488281
			75.4375	-0.0518799		75.375	-0.0488281
			75.4375	-0.0494385		75.4375	-0.0506592
			75.5	-0.0482178		75.5	-0.0524902
			75.5625	-0.0476074		75.5625	-0.0549316
			75.625	-0.0445557		75.625	-0.0537109
			75.6875	-0.0457764		75.625	-0.055542
			75.6875	-0.0457764		75.6875	-0.0561523
			75.75	-0.0476074		75.75	-0.0579834
			75.8125	-0.0494385		75.8125	-0.057373
			75.875	-0.0531006		75.875	-0.0543213
			75.9375	-0.0585938		75.875	-0.0531006
			75.9375	-0.0628662		75.9375	-0.0524902
			76	-0.0653076		76	-0.0512695
			76.0625	-0.0640869		76.0625	-0.0494385
			76.125	-0.0708008		76.125	-0.0482178
			76.1875	-0.0744629		76.125	-0.0457764
			76.1875	-0.0793457		76.1875	-0.0457764
			76.25	-0.0811768		76.25	-0.0421143
			76.3125	-0.0817871		76.3125	-0.0408936
			76.375	-0.0830078		76.375	-0.0415039
			76.4375	-0.0860596		76.375	-0.0396729
			76.4375	-0.0866699		76.4375	-0.0421143
			76.5	-0.0878906		76.5	-0.0415039
			76.5625	-0.0860596		76.5625	-0.045166
			76.625	-0.0878906		76.625	-0.0482178
			76.6875	-0.0891113		76.625	-0.0518799
			76.6875	-0.090332		76.6875	-0.0512695
			76.75	-0.090332		76.75	-0.0482178
			76.8125	-0.0915527		76.8125	-0.0488281
			76.875	-0.0921631		76.875	-0.0469971
			76.9375	-0.0927734		76.875	-0.0457764
			76.9375	-0.0933838		76.9375	-0.0402832
			77	-0.0970459		77	-0.0372314
			77.0625	-0.0976562		77.0625	-0.0378418
			77.125	-0.0946045		77.125	-0.0366211
			77.1875	-0.0909424		77.125	-0.0366211
			77.1875	-0.0891113		77.1875	-0.0341797
			77.25	-0.090332		77.25	-0.0317383
			77.3125	-0.0897217		77.3125	-0.0323486
			77.375	-0.0921631		77.375	-0.0311279
			77.4375	-0.0915527		77.375	-0.0299072
			77.4375	-0.0964355		77.4375	-0.032959
			77.5	-0.100098		77.5	-0.0311279
			77.5625	-0.107422		77.5625	-0.032959
			77.625	-0.109253		77.625	-0.0311279
			77.6875	-0.113525		77.625	-0.0311279
			77.6875	-0.115356		77.6875	-0.0311279
			77.75	-0.120239		77.75	-0.0311279
			77.8125	-0.12146		77.8125	-0.0323486
			77.875	-0.123901		77.875	-0.0286865
			77.9375	-0.125122		77.875	-0.0323486
			77.9375	-0.126343		77.9375	-0.032959
			78	-0.127563		78	-0.0341797
			78.0625	-0.128174		78.0625	-0.0317383
			78.125	-0.130005		78.125	-0.0280762
			78.1875	-0.133667		78.125	-0.0274658
			78.1875	-0.133057		78.1875	-0.0256348
			78.25	-0.134277		78.25	-0.0231934
			78.3125	-0.134888		78.3125	-0.0189209
			78.375	-0.137329		78.375	-0.0177002
			78.4375	-0.136719		78.375	-0.0170898
			78.4375	-0.135498		78.4375	-0.0170898
			78.5	-0.130005		78.5	-0.0158691
			78.5625	-0.127563		78.5625	-0.0152588
			78.625	-0.123901		78.625	-0.0128174
			78.6875	-0.12085		78.625	-0.00915527
			78.6875	-0.117798		78.6875	-0.00793457
			78.75	-0.111694		78.75	-0.00488281
			78.8125	-0.107422		78.8125	-0.00488281
			78.875	-0.105591		78.875	-0.00488281
			78.9375	-0.101318		78.875	-0.00183106
			78.9375	-0.0958252		78.9375	0
			79	-0.0927734		79	0.0012207
			79.0625	-0.0872803		79.0625	0.0012207
			79.125	-0.0854492		79.125	-0.000610352
			79.1875	-0.0830078		79.125	0.0012207
			79.1875	-0.0823975		79.1875	0.00305176
			79.25	-0.0842285		79.25	0.00305176
			79.3125	-0.0823975		79.3125	0.00305176
			79.375	-0.0823975		79.375	0.00244141
			79.4375	-0.0799561		79.375	0.00488281
			79.4375	-0.0817871		79.4375	0.00488281
			79.5	-0.0823975		79.5	0.00610352
			79.5625	-0.0811768		79.5625	0.00549316
			79.625	-0.0793457		79.625	0.00732422
			79.6875	-0.0762939		79.625	0.0128174
			79.6875	-0.0762939		79.6875	0.0170898
			79.75	-0.0744629		79.75	0.0201416
			79.8125	-0.0714111		79.8125	0.022583
			79.875	-0.0640869		79.875	0.022583
			79.9375	-0.0592041		79.875	0.0219727
			79.9375	-0.055542		79.9375	0.0231934
			80	-0.0518799		80	0.0213623
			80.0625	-0.0463867		80.0625	0.0189209
			80.125	-0.0415039		80.125	0.0183105
			80.1875	-0.0341797		80.125	0.0140381
			80.1875	-0.0280762		80.1875	0.00854492
			80.25	-0.0250244		80.25	0.00488281
			80.3125	-0.0189209		80.3125	0.00549316
			80.375	-0.0164795		80.375	0.00305176
			80.4375	-0.0109863		80.375	0.000610352
			80.4375	-0.00793457		80.4375	-0.00366211
			80.5	-0.00671387		80.5	-0.00671387
			80.5625	-0.00671387		80.5625	-0.00549316
			80.625	-0.00671387		80.625	-0.00610352
			80.6875	-0.00732422		80.625	-0.00732422
			80.6875	-0.00427246		80.6875	-0.00793457
			80.75	-0.00366211		80.75	-0.00549316
			80.8125	-0.00366211		80.8125	-0.00488281
			80.875	-0.00427246		80.875	-0.00366211
			80.9375	-0.00488281		80.875	-0.00732422
			80.9375	-0.0012207		80.9375	-0.00793457
			81	0.000610352		81	-0.00976562
			81.0625	-0.00183106		81.0625	-0.0128174
			81.125	-0.000610352		81.125	-0.0164795
			81.1875	-0.0012207		81.125	-0.020752
			81.1875	0.000610352		81.1875	-0.0238037
			81.25	0.00244141		81.25	-0.0292969
			81.3125	0.00366211		81.3125	-0.0366211
			81.375	0.00305176		81.375	-0.0421143
			81.4375	0.00305176		81.375	-0.0457764
			81.4375	0.00183106		81.4375	-0.0488281
			81.5	0.00427246		81.5	-0.0512695
			81.5625	0		81.5625	-0.057373
			81.625	-0.00305176		81.625	-0.0622559
			81.6875	-0.00732422		81.625	-0.0634766
			81.6875	-0.010376		81.6875	-0.0665283
			81.75	-0.0128174		81.75	-0.0701904
			81.8125	-0.0128174		81.8125	-0.0762939
			81.875	-0.0128174		81.875	-0.0793457
			81.9375	-0.0134277		81.875	-0.0793457
			81.9375	-0.0158691		81.9375	-0.0805664
			82	-0.0152588		82	-0.0817871
			82.0625	-0.0140381		82.0625	-0.0830078
			82.125	-0.00793457		82.125	-0.0811768
			82.1875	-0.00854492		82.125	-0.0799561
			82.1875	-0.00976562		82.1875	-0.078125
			82.25	-0.00854492		82.25	-0.0762939
			82.3125	-0.00915527		82.3125	-0.0775146
			82.375	-0.00915527		82.375	-0.0793457
			82.4375	-0.0128174		82.375	-0.0830078
			82.4375	-0.0189209		82.4375	-0.0878906
			82.5	-0.0250244		82.5	-0.0921631
			82.5625	-0.0292969		82.5625	-0.0976562
			82.625	-0.0354004		82.625	-0.103149
			82.6875	-0.0366211		82.625	-0.108643
			82.6875	-0.0427246		82.6875	-0.111084
			82.75	-0.0390625		82.75	-0.111084
			82.8125	-0.0396729		82.8125	-0.109253
			82.875	-0.0360107		82.875	-0.108643
			82.9375	-0.0323486		82.875	-0.108643
			82.9375	-0.0292969		82.9375	-0.109253
			83	-0.0274658		83	-0.10437
			83.0625	-0.0262451		83.0625	-0.101318
			83.125	-0.0286865		83.125	-0.102539
			83.1875	-0.0244141		83.125	-0.100708
			83.1875	-0.0238037		83.1875	-0.101318
			83.25	-0.0250244		83.25	-0.098877
			83.3125	-0.0280762		83.3125	-0.0970459
			83.375	-0.0323486		83.375	-0.098877
			83.4375	-0.0341797		83.375	-0.0982666
			83.4375	-0.0335693		83.4375	-0.0976562
			83.5	-0.0378418		83.5	-0.098877
			83.5625	-0.0408936		83.5625	-0.0970459
			83.625	-0.0463867		83.625	-0.0964355
			83.6875	-0.0463867		83.625	-0.0946045
			83.6875	-0.0463867		83.6875	-0.0915527
			83.75	-0.0488281		83.75	-0.090332
			83.8125	-0.0488281		83.8125	-0.0891113
			83.875	-0.0500488		83.875	-0.0878906
			83.9375	-0.0476074		83.875	-0.0866699
			83.9375	-0.0476074		83.9375	-0.088501
			84	-0.0469971		84	-0.0909424
			84.0625	-0.0482178		84.0625	-0.0915527
			84.125	-0.0488281		84.125	-0.0909424
			84.1875	-0.0488281		84.125	-0.0866699
			84.1875	-0.0506592		84.1875	-0.0866699
			84.25	-0.0476074		84.25	-0.0860596
			84.3125	-0.0445557		84.3125	-0.0854492
			84.375	-0.043335		84.375	-0.0811768
			84.4375	-0.0402832		84.375	-0.0817871
			84.4375	-0.0390625		84.4375	-0.0823975
			84.5	-0.0360107		84.5	-0.0872803
			84.5625	-0.0317383		84.5625	-0.090332
			84.625	-0.0323486		84.625	-0.0933838
			84.6875	-0.0335693		84.625	-0.0958252
			84.6875	-0.0378418		84.6875	-0.0958252
			84.75	-0.0415039		84.75	-0.0994873
			84.8125	-0.0439453		84.8125	-0.0964355
			84.875	-0.0476074		84.875	-0.0952148
			84.9375	-0.0549316		84.875	-0.0933838
			84.9375	-0.0610352		84.9375	-0.0878906
			85	-0.0622559		85	-0.0836182
			85.0625	-0.065918		85.0625	-0.0805664
			85.125	-0.067749		85.125	-0.0787354
			85.1875	-0.0701904		85.125	-0.0787354
			85.1875	-0.0708008		85.1875	-0.0787354
			85.25	-0.0695801		85.25	-0.0744629
			85.3125	-0.0689697		85.3125	-0.0762939
			85.375	-0.0634766		85.375	-0.0756836
			85.4375	-0.0610352		85.375	-0.078125
			85.4375	-0.055542		85.4375	-0.0750732
			85.5	-0.0531006		85.5	-0.0744629
			85.5625	-0.0512695		85.5625	-0.0744629
			85.625	-0.0476074		85.625	-0.0738525
			85.6875	-0.0445557		85.625	-0.0720215
			85.6875	-0.043335		85.6875	-0.0683594
			85.75	-0.0439453		85.75	-0.0640869
			85.8125	-0.0445557		85.8125	-0.0622559
			85.875	-0.0457764		85.875	-0.0634766
			85.9375	-0.0421143		85.875	-0.0610352
			85.9375	-0.0415039		85.9375	-0.0610352
			86	-0.045166		86	-0.0585938
			86.0625	-0.0469971		86.0625	-0.0592041
			86.125	-0.0469971		86.125	-0.057373
			86.1875	-0.0494385		86.125	-0.057373
			86.1875	-0.0494385		86.1875	-0.0579834
			86.25	-0.0531006		86.25	-0.0616455
			86.3125	-0.0543213		86.3125	-0.0622559
			86.375	-0.0512695		86.375	-0.0610352
			86.4375	-0.0512695		86.375	-0.0646973
			86.4375	-0.0457764		86.4375	-0.0671387
			86.5	-0.0445557		86.5	-0.0695801
			86.5625	-0.0396729		86.5625	-0.0671387
			86.625	-0.0354004		86.625	-0.0634766
			86.6875	-0.0305176		86.625	-0.0610352
			86.6875	-0.0238037		86.6875	-0.0610352
			86.75	-0.0183105		86.75	-0.0579834
			86.8125	-0.0134277		86.8125	-0.0561523
			86.875	-0.0140381		86.875	-0.0531006
			86.9375	-0.0140381		86.875	-0.0506592
			86.9375	-0.0146484		86.9375	-0.0512695
			87	-0.0109863		87	-0.0512695
			87.0625	-0.00976562		87.0625	-0.0506592
			87.125	-0.010376		87.125	-0.0524902
			87.1875	-0.00976562		87.125	-0.0506592
			87.1875	-0.00854492		87.1875	-0.0524902
			87.25	-0.00549316		87.25	-0.0524902
			87.3125	-0.00244141		87.3125	-0.055542
			87.375	-0.00305176		87.375	-0.0585938
			87.4375	-0.00183106		87.375	-0.057373
			87.4375	0		87.4375	-0.0567627
			87.5	0.000610352		87.5	-0.0598145
			87.5625	0.0012207		87.5625	-0.0640869
			87.625	-0.000610352		87.625	-0.067749
			87.6875	-0.000610352		87.625	-0.0714111
			87.6875	0.000610352		87.6875	-0.0701904
			87.75	0.00244141		87.75	-0.0744629
			87.8125	0.00549316		87.8125	-0.0732422
			87.875	0.00976562		87.875	-0.0756836
			87.9375	0.012207		87.875	-0.0756836
			87.9375	0.012207		87.9375	-0.0762939
			88	0.0134277		88	-0.0769043
			88.0625	0.0109863		88.0625	-0.0799561
			88.125	0.0134277		88.125	-0.0811768
			88.1875	0.0134277		88.125	-0.0830078
			88.1875	0.0115967		88.1875	-0.0836182
			88.25	0.00793457		88.25	-0.0836182
			88.3125	0.00732422		88.3125	-0.0854492
			88.375	0.0115967		88.375	-0.0897217
			88.4375	0.0140381		88.375	-0.0939941
			88.4375	0.0170898		88.4375	-0.101929
			88.5	0.0177002		88.5	-0.105591
			88.5625	0.0231934		88.5625	-0.110474
			88.625	0.0244141		88.625	-0.115967
			88.6875	0.0286865		88.625	-0.12207
			88.6875	0.0286865		88.6875	-0.128784
			88.75	0.0262451		88.75	-0.130615
			88.8125	0.0238037		88.8125	-0.131836
			88.875	0.0170898		88.875	-0.132446
			88.9375	0.0170898		88.875	-0.135498
			88.9375	0.0115967		88.9375	-0.13916
			89	0.00671387		89	-0.142212
			89.0625	-0.00183106		89.0625	-0.137939
			89.125	-0.00793457		89.125	-0.140381
			89.1875	-0.0146484		89.125	-0.141602
			89.1875	-0.0183105		89.1875	-0.144653
			89.25	-0.0244141		89.25	-0.144653
			89.3125	-0.0311279		89.3125	-0.145874
			89.375	-0.0354004		89.375	-0.144653
			89.4375	-0.0408936		89.375	-0.147705
			89.4375	-0.0439453		89.4375	-0.148315
			89.5	-0.0482178		89.5	-0.150146
			89.5625	-0.0518799		89.5625	-0.150146
			89.625	-0.0561523		89.625	-0.148926
			89.6875	-0.0579834		89.625	-0.148315
			89.6875	-0.0585938		89.6875	-0.150757
			89.75	-0.0610352		89.75	-0.152588
			89.8125	-0.0628662		89.8125	-0.155029
			89.875	-0.0665283		89.875	-0.154419
			89.9375	-0.0708008		89.875	-0.152588
			89.9375	-0.0756836		89.9375	-0.148315
			90	-0.0775146		90	-0.147095
			90.0625	-0.0823975		90.0625	-0.144043
			90.125	-0.0866699		90.125	-0.140991
			90.1875	-0.0909424		90.125	-0.133667
			90.1875	-0.0958252		90.1875	-0.127563
			90.25	-0.0994873		90.25	-0.125122
			90.3125	-0.100098		90.3125	-0.123901
			90.375	-0.0958252		90.375	-0.120239
			90.4375	-0.0946045		90.375	-0.114746
			90.4375	-0.0909424		90.4375	-0.111084
			90.5	-0.0897217		90.5	-0.108643
			90.5625	-0.0848389		90.5625	-0.108032
			90.625	-0.0805664		90.625	-0.10376
			90.6875	-0.0836182		90.625	-0.103149
			90.6875	-0.088501		90.6875	-0.0994873
			90.75	-0.0927734		90.75	-0.0976562
			90.8125	-0.0958252		90.8125	-0.0964355
			90.875	-0.0952148		90.875	-0.0952148
			90.9375	-0.0964355		90.875	-0.0946045
			90.9375	-0.0994873		90.9375	-0.0958252
			91	-0.098877		91	-0.0915527
			91.0625	-0.0976562		91.0625	-0.088501
			91.125	-0.0946045		91.125	-0.0854492
			91.1875	-0.0933838		91.125	-0.0836182
			91.1875	-0.0927734		91.1875	-0.0805664
			91.25	-0.0909424		91.25	-0.0744629
			91.3125	-0.0939941		91.3125	-0.0689697
			91.375	-0.0952148		91.375	-0.0689697
			91.4375	-0.0970459		91.375	-0.067749
			91.4375	-0.098877		91.4375	-0.0683594
			91.5	-0.0994873		91.5	-0.0622559
			91.5625	-0.0994873		91.5625	-0.0610352
			91.625	-0.0982666		91.625	-0.0610352
			91.6875	-0.0915527		91.625	-0.0604248
			91.6875	-0.0872803		91.6875	-0.0579834
			91.75	-0.0848389		91.75	-0.0524902
			91.8125	-0.0817871		91.8125	-0.0445557
			91.875	-0.0799561		91.875	-0.0415039
			91.9375	-0.0756836		91.875	-0.0354004
			91.9375	-0.0738525		91.9375	-0.0299072
			92	-0.0732422		92	-0.0268555
			92.0625	-0.078125		92.0625	-0.022583
			92.125	-0.0805664		92.125	-0.0183105
			92.1875	-0.0805664		92.125	-0.0146484
			92.1875	-0.0811768		92.1875	-0.0128174
			92.25	-0.0830078		92.25	-0.0128174
			92.3125	-0.0860596		92.3125	-0.012207
			92.375	-0.088501		92.375	-0.0128174
			92.4375	-0.088501		92.375	-0.00915527
			92.4375	-0.088501		92.4375	-0.010376
			92.5	-0.0872803		92.5	-0.0115967
			92.5625	-0.0854492		92.5625	-0.0109863
			92.625	-0.0836182		92.625	-0.00793457
			92.6875	-0.0805664		92.625	-0.00427246
			92.6875	-0.0793457		92.6875	-0.00183106
			92.75	-0.0756836		92.75	-0.00366211
			92.8125	-0.0726318		92.8125	-0.00244141
			92.875	-0.0720215		92.875	-0.00183106
			92.9375	-0.0689697		92.875	-0.00183106
			92.9375	-0.0683594		92.9375	-0.00244141
			93	-0.0653076		93	-0.00793457
			93.0625	-0.0592041		93.0625	-0.00915527
			93.125	-0.057373		93.125	-0.0134277
			93.1875	-0.0585938		93.125	-0.0152588
			93.1875	-0.057373		93.1875	-0.0164795
			93.25	-0.0579834		93.25	-0.0183105
			93.3125	-0.0543213		93.3125	-0.0158691
			93.375	-0.0531006		93.375	-0.0152588
			93.4375	-0.0543213		93.375	-0.0140381
			93.4375	-0.0567627		93.4375	-0.00854492
			93.5	-0.057373		93.5	-0.00793457
			93.5625	-0.0616455		93.5625	-0.00854492
			93.625	-0.0665283		93.625	-0.0115967
			93.6875	-0.0732422		93.625	-0.0158691
			93.6875	-0.078125		93.6875	-0.0189209
			93.75	-0.0823975		93.75	-0.0177002
			93.8125	-0.0854492		93.8125	-0.0231934
			93.875	-0.0836182		93.875	-0.0238037
			93.9375	-0.0823975		93.875	-0.0274658
			93.9375	-0.0775146		93.9375	-0.0244141
			94	-0.0775146		94	-0.0219727
			94.0625	-0.0769043		94.0625	-0.0201416
			94.125	-0.0744629		94.125	-0.0238037
			94.1875	-0.0720215		94.125	-0.0268555
			94.1875	-0.0708008		94.1875	-0.0305176
			94.25	-0.0744629		94.25	-0.0354004
			94.3125	-0.0769043		94.3125	-0.0415039
			94.375	-0.0817871		94.375	-0.0457764
			94.4375	-0.0811768		94.375	-0.0518799
			94.4375	-0.0854492		94.4375	-0.0543213
			94.5	-0.0891113		94.5	-0.057373
			94.5625	-0.0933838		94.5625	-0.0567627
			94.625	-0.0927734		94.625	-0.0567627
			94.6875	-0.0927734		94.625	-0.0543213
			94.6875	-0.0897217		94.6875	-0.0561523
			94.75	-0.088501		94.75	-0.0531006
			94.8125	-0.0878906		94.8125	-0.0524902
			94.875	-0.0830078		94.875	-0.0457764
			94.9375	-0.0830078		94.875	-0.0445557
			94.9375	-0.0787354		94.9375	-0.0427246
			95	-0.078125		95	-0.0421143
			95.0625	-0.078125		95.0625	-0.0402832
			95.125	-0.0799561		95.125	-0.03479
			95.1875	-0.0811768		95.125	-0.0341797
			95.1875	-0.0830078		95.1875	-0.0360107
			95.25	-0.0830078		95.25	-0.0366211
			95.3125	-0.0836182		95.3125	-0.0366211
			95.375	-0.0848389		95.375	-0.0378418
			95.4375	-0.0860596		95.375	-0.0390625
			95.4375	-0.0848389		95.4375	-0.0445557
			95.5	-0.0793457		95.5	-0.0494385
			95.5625	-0.078125		95.5625	-0.0537109
			95.625	-0.0775146		95.625	-0.0604248
			95.6875	-0.0793457		95.625	-0.0616455
			95.6875	-0.0787354		95.6875	-0.067749
			95.75	-0.0756836		95.75	-0.0689697
			95.8125	-0.0750732		95.8125	-0.0714111
			95.875	-0.0762939		95.875	-0.0738525
			95.9375	-0.0775146		95.875	-0.0720215
			95.9375	-0.0762939		95.9375	-0.0714111
			96	-0.0756836		96	-0.0689697
			96.0625	-0.0756836		96.0625	-0.0689697
			96.125	-0.0738525		96.125	-0.0671387
			96.1875	-0.0769043		96.125	-0.0653076
			96.1875	-0.0750732		96.1875	-0.0592041
			96.25	-0.0769043		96.25	-0.055542
			96.3125	-0.0756836		96.3125	-0.0543213
			96.375	-0.0750732		96.375	-0.0531006
			96.4375	-0.0744629		96.375	-0.0506592
			96.4375	-0.0787354		96.4375	-0.0482178
			96.5	-0.0805664		96.5	-0.0469971
			96.5625	-0.0854492		96.5625	-0.0512695
			96.625	-0.0872803		96.625	-0.0561523
			96.6875	-0.090332		96.625	-0.0616455
			96.6875	-0.0970459		96.6875	-0.0665283
			96.75	-0.102539		96.75	-0.0653076
			96.8125	-0.109253		96.8125	-0.0671387
			96.875	-0.109253		96.875	-0.0665283
			96.9375	-0.111694		96.875	-0.0616455
			96.9375	-0.113525		96.9375	-0.0579834
			97	-0.115967		97	-0.0512695
			97.0625	-0.114746		97.0625	-0.045166
			97.125	-0.110474		97.125	-0.0402832
			97.1875	-0.10437		97.125	-0.0396729
			97.1875	-0.100708		97.1875	-0.0402832
			97.25	-0.0976562		97.25	-0.0396729
			97.3125	-0.0964355		97.3125	-0.0384521
			97.375	-0.0952148		97.375	-0.0378418
			97.4375	-0.0970459		97.375	-0.0366211
			97.4375	-0.0982666		97.4375	-0.0354004
			97.5	-0.103149		97.5	-0.0317383
			97.5625	-0.107422		97.5625	-0.0231934
			97.625	-0.114746		97.625	-0.0219727
			97.6875	-0.119019		97.625	-0.020752
			97.6875	-0.12207		97.6875	-0.0195312
			97.75	-0.125732		97.75	-0.0195312
			97.8125	-0.131226		97.8125	-0.0189209
			97.875	-0.136108		97.875	-0.0177002
			97.9375	-0.140991		97.875	-0.0170898
			97.9375	-0.145264		97.9375	-0.0164795
			98	-0.147705		98	-0.0140381
			98.0625	-0.150757		98.0625	-0.012207
			98.125	-0.15564		98.125	-0.0115967
			98.1875	-0.158081		98.125	-0.010376
			98.1875	-0.159302		98.1875	-0.00854492
			98.25	-0.158691		98.25	-0.010376
			98.3125	-0.160522		98.3125	-0.00854492
			98.375	-0.161133		98.375	-0.0109863
			98.4375	-0.158081		98.375	-0.00793457
			98.4375	-0.152588		98.4375	-0.00732422
			98.5	-0.146484		98.5	-0.0115967
			98.5625	-0.13916		98.5625	-0.0140381
			98.625	-0.133057		98.625	-0.0164795
			98.6875	-0.126953		98.625	-0.0134277
			98.6875	-0.125732		98.6875	-0.0134277
			98.75	-0.124512		98.75	-0.0140381
			98.8125	-0.120239		98.8125	-0.0152588
			98.875	-0.119629		98.875	-0.0177002
			98.9375	-0.12146		98.875	-0.0140381
			98.9375	-0.124512		98.9375	-0.0134277
			99	-0.126953		99	-0.0128174
			99.0625	-0.128784		99.0625	-0.0140381
			99.125	-0.123901		99.125	-0.00976562
			99.1875	-0.126343		99.125	-0.00488281
			99.1875	-0.126953		99.1875	-0.000610352
			99.25	-0.127563		99.25	0.00427246
			99.3125	-0.122681		99.3125	0.00549316
			99.375	-0.115356		99.375	0.0109863
			99.4375	-0.108643		99.375	0.0115967
			99.4375	-0.10376		99.4375	0.0140381
			99.5	-0.0976562		99.5	0.0183105
			99.5625	-0.090332		99.5625	0.0195312
			99.625	-0.0842285		99.625	0.0201416
			99.6875	-0.0799561		99.625	0.0189209
			99.6875	-0.0756836		99.6875	0.0183105
			99.75	-0.0744629		99.75	0.0170898
			99.8125	-0.0726318		99.8125	0.0164795
[truncated: 98,004 more rows]
