# Supplementary material for: The cation channel mechanisms of subthreshold inward depolarizing currents in the mice VTA dopaminergic neurons and their roles in the chronic-stress-induced depression-like behavior
Source: eLife. 2024 Dec 6;12:RP88319. doi: 10.7554/eLife.88319 (PMC11623934; doi:10.7554/eLife.88319)
Supplement: Figure 4—source data 3. [file elife-88319-fig4-data3.xlsx]

## Sheet: Figure 4 B i
time-course
Time(min)	Firing rate(Hz)
0.26	2.82051
0.52	2.75641
0.78	2.88462
1.04	2.82051
1.3	2.94872
1.56	2.82051
1.82	2.75641
2.08	2.69231
2.34	2.5641
2.6	2.75641
2.86	2.62821
3.12	2.75641
3.38	2.62821
3.64	2.69231
3.9	2.62821
4.16	2.62821
4.42	2.69231
4.68	2.5641
4.94	2.69231
5.2	2.69231
5.46	2.5641
5.72	2.62821
5.98	2.62821
6.24	2.62821
6.5	2.62821
6.76	2.5641
7.02	2.62821
7.28	2.62821
7.54	2.62821
7.8	2.62821
8.06	2.62821
8.32	2.5
8.58	2.4359
8.84	2.37179
9.1	2.30769
9.36	2.24359
9.62	2.17949
9.88	2.17949
10.14	2.05128
10.4	2.05128
10.66	1.98718
10.92	1.85897
11.18	1.79487
11.44	1.73077
11.7	1.66667
11.96	1.60256
12.22	1.28205
12.48	0.76923
12.74	1.02564
13	0.44872
13.26	0.32051
13.52	0.44872
13.78	0.83333
14.04	0.12821
14.3	0
14.56	0
14.82	0
15.08	0
15.34	0
15.6	0
15.86	0
16.12	0.44872
16.38	0
16.64	0
16.9	0
17.16	1.21795
17.42	1.73077
17.68	1.60256
17.94	1.53846
18.2	1.79487
18.46	1.79487
18.72	1.79487
18.98	1.79487
19.24	1.85897
19.5	1.85897
19.76	1.85897
20.02	1.79487
20.28	1.92308
20.54	1.85897
20.8	1.98718
21.06	1.98718
21.32	1.98718
21.58	1.98718
21.84	1.98718
22.1	1.98718
22.36	1.98718
22.62	1.98718
22.88	2.05128
23.14	1.98718
23.4	1.98718
23.66	1.98718
23.92	1.92308
24.18	1.98718
24.44	2.05128
24.7	2.05128
24.96	1.98718
25.22	2.05128
25.48	2.11538
25.74	2.11538
26	2.11538

## Sheet: Figure 4 B ii
Example traces
acsf			2-APB			acsf
Time(ms)	RMP(mv)		Time(ms)	RMP(mv)		Time(ms)	RMP(mv)
0	-0.45776		0	-0.57983		0	-0.61035
0.0625	-0.45776		0.0625	-0.48828		0	-0.64087
0.09375	-0.42725		0.0625	-0.45776		0.125	-0.61035
0.15625	-0.39673		0.125	-0.45776		0.125	-0.57983
0.21875	-0.30518		0.1875	-0.42725		0.25	-0.57983
0.25	-0.39673		0.25	-0.5188		0.25	-0.57983
0.3125	-0.48828		0.3125	-0.54932		0.25	-0.39673
0.34375	-0.54932		0.3125	-0.54932		0.375	-0.54932
0.40625	-0.42725		0.375	-0.48828		0.375	-0.61035
0.46875	-0.36621		0.4375	-0.42725		0.5	-0.73242
0.5	-0.42725		0.5	-0.36621		0.5	-0.64087
0.5625	-0.42725		0.5625	-0.48828		0.5	-0.5188
0.59375	-0.42725		0.5625	-0.5188		0.625	-0.64087
0.65625	-0.39673		0.625	-0.57983		0.625	-0.67139
0.71875	-0.33569		0.6875	-0.39673		0.75	-0.76294
0.75	-0.36621		0.75	-0.30518		0.75	-0.64087
0.8125	-0.39673		0.8125	-0.36621		0.75	-0.57983
0.84375	-0.30518		0.8125	-0.45776		0.875	-0.61035
0.90625	-0.36621		0.875	-0.61035		0.875	-0.7019
0.96875	-0.30518		0.9375	-0.54932		1	-0.67139
1	-0.36621		1	-0.27466		1	-0.73242
1.0625	-0.42725		1.0625	-0.30518		1	-0.64087
1.09375	-0.24414		1.0625	-0.42725		1.125	-0.76294
1.15625	-0.30518		1.125	-0.54932		1.125	-0.76294
1.21875	-0.30518		1.1875	-0.45776		1.25	-0.67139
1.25	-0.30518		1.25	-0.36621		1.25	-0.7019
1.3125	-0.27466		1.3125	-0.39673		1.25	-0.76294
1.34375	-0.24414		1.3125	-0.39673		1.375	-0.79346
1.40625	-0.30518		1.375	-0.5188		1.375	-0.76294
1.46875	-0.27466		1.4375	-0.39673		1.5	-0.79346
1.5	-0.27466		1.5	-0.42725		1.5	-0.73242
1.5625	-0.18311		1.5625	-0.45776		1.5	-0.79346
1.59375	-0.30518		1.5625	-0.36621		1.625	-0.73242
1.65625	-0.39673		1.625	-0.39673		1.625	-0.61035
1.71875	-0.33569		1.6875	-0.27466		1.75	-0.61035
1.75	-0.27466		1.75	-0.39673		1.75	-0.76294
1.8125	-0.30518		1.8125	-0.54932		1.75	-0.76294
1.84375	-0.15259		1.8125	-0.36621		1.875	-0.82397
1.90625	-0.24414		1.875	-0.27466		1.875	-0.73242
1.96875	-0.27466		1.9375	-0.30518		2	-0.73242
2	-0.24414		2	-0.36621		2	-0.82397
2.0625	-0.36621		2.0625	-0.42725		2	-0.85449
2.09375	-0.21362		2.0625	-0.24414		2.125	-0.7019
2.15625	-0.21362		2.125	-0.18311		2.125	-0.73242
2.21875	-0.21362		2.1875	-0.30518		2.25	-0.7019
2.25	-0.33569		2.25	-0.33569		2.25	-0.7019
2.3125	-0.30518		2.3125	-0.33569		2.25	-0.7019
2.34375	-0.18311		2.3125	-0.18311		2.375	-0.73242
2.40625	-0.18311		2.375	-0.21362		2.375	-0.61035
2.46875	-0.21362		2.4375	-0.33569		2.5	-0.67139
2.5	-0.42725		2.5	-0.33569		2.5	-0.7019
2.5625	-0.39673		2.5625	-0.30518		2.5	-0.61035
2.59375	-0.36621		2.5625	-0.15259		2.625	-0.7019
2.65625	-0.21362		2.625	-0.27466		2.625	-0.67139
2.71875	-0.30518		2.6875	-0.33569		2.75	-0.73242
2.75	-0.36621		2.75	-0.33569		2.75	-0.54932
2.8125	-0.30518		2.8125	-0.21362		2.75	-0.61035
2.84375	-0.36621		2.8125	-0.21362		2.875	-0.67139
2.90625	-0.36621		2.875	-0.33569		2.875	-0.76294
2.96875	-0.30518		2.9375	-0.24414		3	-0.61035
3	-0.33569		3	-0.12207		3	-0.54932
3.0625	-0.42725		3.0625	-0.15259		3	-0.45776
3.09375	-0.42725		3.0625	-0.27466		3.125	-0.54932
3.15625	-0.42725		3.125	-0.42725		3.125	-0.67139
3.21875	-0.45776		3.1875	-0.33569		3.25	-0.57983
3.25	-0.42725		3.25	-0.15259		3.25	-0.45776
3.3125	-0.42725		3.3125	-0.24414		3.25	-0.33569
3.34375	-0.45776		3.3125	-0.39673		3.375	-0.42725
3.40625	-0.45776		3.375	-0.33569		3.375	-0.42725
3.46875	-0.61035		3.4375	-0.21362		3.5	-0.48828
3.5	-0.54932		3.5	-0.18311		3.5	-0.39673
3.5625	-0.42725		3.5625	-0.27466		3.5	-0.42725
3.59375	-0.45776		3.5625	-0.39673		3.625	-0.36621
3.65625	-0.54932		3.625	-0.36621		3.625	-0.30518
3.71875	-0.61035		3.6875	-0.30518		3.75	-0.36621
3.75	-0.64087		3.75	-0.33569		3.75	-0.42725
3.8125	-0.57983		3.8125	-0.30518		3.75	-0.42725
3.84375	-0.5188		3.8125	-0.30518		3.875	-0.42725
3.90625	-0.64087		3.875	-0.24414		3.875	-0.15259
3.96875	-0.67139		3.9375	-0.30518		4	-0.24414
4	-0.67139		4	-0.42725		4	-0.33569
4.0625	-0.61035		4.0625	-0.5188		4	-0.42725
4.09375	-0.57983		4.0625	-0.33569		4.125	-0.39673
4.15625	-0.7019		4.125	-0.21362		4.125	-0.27466
4.21875	-0.67139		4.1875	-0.39673		4.25	-0.18311
4.25	-0.7019		4.25	-0.48828		4.25	-0.33569
4.3125	-0.64087		4.3125	-0.48828		4.25	-0.33569
4.34375	-0.67139		4.3125	-0.27466		4.375	-0.39673
4.40625	-0.7019		4.375	-0.24414		4.375	-0.24414
4.46875	-0.64087		4.4375	-0.45776		4.5	-0.15259
4.5	-0.73242		4.5	-0.54932		4.5	-0.24414
4.5625	-0.7019		4.5625	-0.64087		4.5	-0.18311
4.59375	-0.67139		4.5625	-0.48828		4.625	-0.30518
4.65625	-0.67139		4.625	-0.45776		4.625	-0.33569
4.71875	-0.67139		4.6875	-0.5188		4.75	-0.27466
4.75	-0.7019		4.75	-0.54932		4.75	-0.24414
4.8125	-0.67139		4.8125	-0.57983		4.75	-0.15259
4.84375	-0.73242		4.8125	-0.57983		4.875	-0.24414
4.90625	-0.57983		4.875	-0.67139		4.875	-0.33569
4.96875	-0.54932		4.9375	-0.57983		5	-0.39673
5	-0.67139		5	-0.54932		5	-0.21362
5.0625	-0.82397		5.0625	-0.57983		5	-0.15259
5.09375	-0.73242		5.0625	-0.67139		5.125	-0.33569
5.15625	-0.67139		5.125	-0.82397		5.125	-0.39673
5.21875	-0.61035		5.1875	-0.64087		5.25	-0.30518
5.25	-0.61035		5.25	-0.54932		5.25	-0.30518
5.3125	-0.76294		5.3125	-0.57983		5.25	-0.24414
5.34375	-0.61035		5.3125	-0.73242		5.375	-0.21362
5.40625	-0.64087		5.375	-0.82397		5.375	-0.39673
5.46875	-0.61035		5.4375	-0.82397		5.5	-0.21362
5.5	-0.54932		5.5	-0.61035		5.5	-0.36621
5.5625	-0.64087		5.5625	-0.64087		5.5	-0.33569
5.59375	-0.57983		5.5625	-0.73242		5.625	-0.30518
5.65625	-0.67139		5.625	-0.7019		5.625	-0.33569
5.71875	-0.76294		5.6875	-0.64087		5.75	-0.33569
5.75	-0.67139		5.75	-0.67139		5.75	-0.30518
5.8125	-0.5188		5.8125	-0.79346		5.75	-0.42725
5.84375	-0.64087		5.8125	-0.76294		5.875	-0.27466
5.90625	-0.7019		5.875	-0.76294		5.875	-0.36621
5.96875	-0.76294		5.9375	-0.73242		6	-0.30518
6	-0.64087		6	-0.76294		6	-0.30518
6.0625	-0.54932		6.0625	-0.85449		6	-0.36621
6.09375	-0.54932		6.0625	-0.7019		6.125	-0.39673
6.15625	-0.57983		6.125	-0.64087		6.125	-0.33569
6.21875	-0.7019		6.1875	-0.73242		6.25	-0.39673
6.25	-0.57983		6.25	-0.76294		6.25	-0.27466
6.3125	-0.57983		6.3125	-0.85449		6.25	-0.48828
6.34375	-0.57983		6.3125	-0.67139		6.375	-0.39673
6.40625	-0.57983		6.375	-0.61035		6.375	-0.42725
6.46875	-0.67139		6.4375	-0.79346		6.5	-0.42725
6.5	-0.57983		6.5	-0.73242		6.5	-0.45776
6.5625	-0.7019		6.5625	-0.7019		6.5	-0.45776
6.59375	-0.64087		6.5625	-0.57983		6.625	-0.39673
6.65625	-0.57983		6.625	-0.64087		6.625	-0.42725
6.71875	-0.57983		6.6875	-0.82397		6.75	-0.48828
6.75	-0.57983		6.75	-0.76294		6.75	-0.42725
6.8125	-0.61035		6.8125	-0.7019		6.75	-0.45776
6.84375	-0.64087		6.8125	-0.64087		6.875	-0.39673
6.90625	-0.5188		6.875	-0.61035		6.875	-0.39673
6.96875	-0.54932		6.9375	-0.7019		7	-0.45776
7	-0.57983		7	-0.67139		7	-0.36621
7.0625	-0.54932		7.0625	-0.67139		7	-0.39673
7.09375	-0.64087		7.0625	-0.67139		7.125	-0.5188
7.15625	-0.48828		7.125	-0.5188		7.125	-0.42725
7.21875	-0.54932		7.1875	-0.61035		7.25	-0.57983
7.25	-0.61035		7.25	-0.64087		7.25	-0.30518
7.3125	-0.64087		7.3125	-0.67139		7.25	-0.42725
7.34375	-0.61035		7.3125	-0.67139		7.375	-0.5188
7.40625	-0.48828		7.375	-0.54932		7.375	-0.54932
7.46875	-0.48828		7.4375	-0.54932		7.5	-0.42725
7.5	-0.57983		7.5	-0.5188		7.5	-0.39673
7.5625	-0.54932		7.5625	-0.57983		7.5	-0.36621
7.59375	-0.61035		7.5625	-0.73242		7.625	-0.54932
7.65625	-0.45776		7.625	-0.61035		7.625	-0.48828
7.71875	-0.48828		7.6875	-0.61035		7.75	-0.45776
7.75	-0.5188		7.75	-0.45776		7.75	-0.42725
7.8125	-0.45776		7.8125	-0.5188		7.75	-0.33569
7.84375	-0.54932		7.8125	-0.7019		7.875	-0.45776
7.90625	-0.54932		7.875	-0.61035		7.875	-0.42725
7.96875	-0.57983		7.9375	-0.5188		8	-0.54932
8	-0.54932		8	-0.61035		8	-0.48828
8.0625	-0.33569		8.0625	-0.48828		8	-0.5188
8.09375	-0.54932		8.0625	-0.54932		8.125	-0.48828
8.15625	-0.57983		8.125	-0.54932		8.125	-0.39673
8.21875	-0.57983		8.1875	-0.54932		8.25	-0.45776
8.25	-0.54932		8.25	-0.67139		8.25	-0.54932
8.3125	-0.36621		8.3125	-0.54932		8.25	-0.48828
8.34375	-0.45776		8.3125	-0.5188		8.375	-0.39673
8.40625	-0.57983		8.375	-0.45776		8.375	-0.39673
8.46875	-0.57983		8.4375	-0.57983		8.5	-0.39673
8.5	-0.54932		8.5	-0.73242		8.5	-0.57983
8.5625	-0.48828		8.5625	-0.57983		8.5	-0.54932
8.59375	-0.45776		8.5625	-0.48828		8.625	-0.48828
8.65625	-0.54932		8.625	-0.45776		8.625	-0.36621
8.71875	-0.45776		8.6875	-0.5188		8.75	-0.36621
8.75	-0.54932		8.75	-0.67139		8.75	-0.54932
8.8125	-0.57983		8.8125	-0.61035		8.75	-0.48828
8.84375	-0.48828		8.8125	-0.5188		8.875	-0.54932
8.90625	-0.42725		8.875	-0.54932		8.875	-0.5188
8.96875	-0.45776		8.9375	-0.54932		9	-0.39673
9	-0.64087		9	-0.54932		9	-0.48828
9.0625	-0.54932		9.0625	-0.5188		9	-0.39673
9.09375	-0.54932		9.0625	-0.54932		9.125	-0.48828
9.15625	-0.48828		9.125	-0.54932		9.125	-0.5188
9.21875	-0.48828		9.1875	-0.48828		9.25	-0.48828
9.25	-0.48828		9.25	-0.54932		9.25	-0.36621
9.3125	-0.54932		9.3125	-0.42725		9.25	-0.36621
9.34375	-0.48828		9.3125	-0.54932		9.375	-0.48828
9.40625	-0.61035		9.375	-0.67139		9.375	-0.54932
9.46875	-0.57983		9.4375	-0.45776		9.5	-0.57983
9.5	-0.54932		9.5	-0.48828		9.5	-0.39673
9.5625	-0.5188		9.5625	-0.45776		9.5	-0.27466
9.59375	-0.54932		9.5625	-0.45776		9.625	-0.45776
9.65625	-0.64087		9.625	-0.54932		9.625	-0.57983
9.71875	-0.48828		9.6875	-0.48828		9.75	-0.42725
9.75	-0.5188		9.75	-0.42725		9.75	-0.48828
9.8125	-0.57983		9.8125	-0.54932		9.75	-0.36621
9.84375	-0.5188		9.8125	-0.57983		9.875	-0.45776
9.90625	-0.57983		9.875	-0.5188		9.875	-0.5188
9.96875	-0.57983		9.9375	-0.54932		10	-0.36621
10	-0.5188		10	-0.5188		10	-0.42725
10.0625	-0.5188		10.0625	-0.57983		10	-0.39673
10.0938	-0.61035		10.0625	-0.54932		10.125	-0.39673
10.1562	-0.57983		10.125	-0.54932		10.125	-0.42725
10.2188	-0.57983		10.1875	-0.45776		10.25	-0.36621
10.25	-0.5188		10.25	-0.54932		10.25	-0.45776
10.3125	-0.54932		10.3125	-0.61035		10.25	-0.48828
10.3438	-0.5188		10.3125	-0.48828		10.375	-0.36621
10.4062	-0.64087		10.375	-0.54932		10.375	-0.33569
10.4688	-0.61035		10.4375	-0.5188		10.5	-0.30518
10.5	-0.54932		10.5	-0.57983		10.5	-0.45776
10.5625	-0.54932		10.5625	-0.54932		10.5	-0.45776
10.5938	-0.61035		10.5625	-0.48828		10.625	-0.30518
10.6562	-0.7019		10.625	-0.5188		10.625	-0.36621
10.7188	-0.67139		10.6875	-0.61035		10.75	-0.24414
10.75	-0.61035		10.75	-0.64087		10.75	-0.33569
10.8125	-0.54932		10.8125	-0.57983		10.75	-0.27466
10.8438	-0.5188		10.8125	-0.45776		10.875	-0.30518
10.9062	-0.61035		10.875	-0.5188		10.875	-0.30518
10.9688	-0.61035		10.9375	-0.7019		11	-0.33569
11	-0.61035		11	-0.61035		11	-0.39673
11.0625	-0.7019		11.0625	-0.64087		11	-0.27466
11.0938	-0.57983		11.0625	-0.45776		11.125	-0.30518
11.1562	-0.61035		11.125	-0.57983		11.125	-0.33569
11.2188	-0.67139		11.1875	-0.64087		11.25	-0.24414
11.25	-0.76294		11.25	-0.57983		11.25	-0.27466
11.3125	-0.85449		11.3125	-0.57983		11.25	-0.24414
11.3438	-0.79346		11.3125	-0.54932		11.375	-0.21362
11.4062	-0.61035		11.375	-0.61035		11.375	-0.39673
11.4688	-0.54932		11.4375	-0.54932		11.5	-0.36621
11.5	-0.79346		11.5	-0.64087		11.5	-0.15259
11.5625	-0.88501		11.5625	-0.64087		11.5	-0.21362
11.5938	-0.82397		11.5625	-0.7019		11.625	-0.30518
11.6562	-0.73242		11.625	-0.7019		11.625	-0.33569
11.7188	-0.67139		11.6875	-0.54932		11.75	-0.33569
11.75	-0.67139		11.75	-0.45776		11.75	-0.21362
11.8125	-0.73242		11.8125	-0.61035		11.75	-0.18311
11.8438	-0.64087		11.8125	-0.7019		11.875	-0.30518
11.9062	-0.76294		11.875	-0.7019		11.875	-0.24414
11.9688	-0.76294		11.9375	-0.7019		12	-0.15259
12	-0.73242		12	-0.48828		12	-0.18311
12.0625	-0.61035		12.0625	-0.67139		12	-0.24414
12.0938	-0.73242		12.0625	-0.7019		12.125	-0.30518
12.1562	-0.73242		12.125	-0.82397		12.125	-0.27466
12.2188	-0.85449		12.1875	-0.79346		12.25	-0.21362
12.25	-0.67139		12.25	-0.76294		12.25	-0.24414
12.3125	-0.61035		12.3125	-0.57983		12.25	-0.21362
12.3438	-0.64087		12.3125	-0.64087		12.375	-0.27466
12.4062	-0.7019		12.375	-0.67139		12.375	-0.27466
12.4688	-0.76294		12.4375	-0.67139		12.5	-0.36621
12.5	-0.64087		12.5	-0.67139		12.5	-0.24414
12.5625	-0.67139		12.5625	-0.73242		12.5	-0.30518
12.5938	-0.67139		12.5625	-0.61035		12.625	-0.21362
12.6562	-0.73242		12.625	-0.64087		12.625	-0.30518
12.7188	-0.7019		12.6875	-0.79346		12.75	-0.36621
12.75	-0.7019		12.75	-0.82397		12.75	-0.42725
12.8125	-0.64087		12.8125	-0.82397		12.75	-0.42725
12.8438	-0.67139		12.8125	-0.7019		12.875	-0.30518
12.9062	-0.73242		12.875	-0.64087		12.875	-0.30518
12.9688	-0.61035		12.9375	-0.76294		13	-0.42725
13	-0.64087		13	-0.79346		13	-0.5188
13.0625	-0.64087		13.0625	-0.73242		13	-0.45776
13.0938	-0.61035		13.0625	-0.73242		13.125	-0.5188
13.1562	-0.57983		13.125	-0.64087		13.125	-0.36621
13.2188	-0.54932		13.1875	-0.7019		13.25	-0.42725
13.25	-0.61035		13.25	-0.67139		13.25	-0.48828
13.3125	-0.57983		13.3125	-0.85449		13.25	-0.5188
13.3438	-0.54932		13.3125	-0.82397		13.375	-0.61035
13.4062	-0.36621		13.375	-0.73242		13.375	-0.48828
13.4688	-0.42725		13.4375	-0.61035		13.5	-0.45776
13.5	-0.48828		13.5	-0.7019		13.5	-0.45776
13.5625	-0.54932		13.5625	-0.76294		13.5	-0.57983
13.5938	-0.48828		13.5625	-0.85449		13.625	-0.64087
13.6562	-0.36621		13.625	-0.7019		13.625	-0.73242
13.7188	-0.30518		13.6875	-0.67139		13.75	-0.57983
13.75	-0.42725		13.75	-0.7019		13.75	-0.61035
13.8125	-0.54932		13.8125	-0.73242		13.75	-0.61035
13.8438	-0.33569		13.8125	-0.76294		13.875	-0.76294
13.9062	-0.36621		13.875	-0.73242		13.875	-0.82397
13.9688	-0.24414		13.9375	-0.61035		14	-0.82397
14	-0.33569		14	-0.54932		14	-0.64087
14.0625	-0.36621		14.0625	-0.7019		14	-0.54932
14.0938	-0.36621		14.0625	-0.67139		14.125	-0.64087
14.1562	-0.36621		14.125	-0.5188		14.125	-0.7019
14.2188	-0.36621		14.1875	-0.45776		14.25	-0.73242
14.25	-0.33569		14.25	-0.57983		14.25	-0.76294
14.3125	-0.30518		14.3125	-0.64087		14.25	-0.64087
14.3438	-0.30518		14.3125	-0.57983		14.375	-0.61035
14.4062	-0.42725		14.375	-0.45776		14.375	-0.7019
14.4688	-0.42725		14.4375	-0.5188		14.5	-0.73242
14.5	-0.27466		14.5	-0.5188		14.5	-0.76294
14.5625	-0.21362		14.5625	-0.54932		14.5	-0.79346
14.5938	-0.21362		14.5625	-0.45776		14.625	-0.7019
14.6562	-0.39673		14.625	-0.5188		14.625	-0.73242
14.7188	-0.42725		14.6875	-0.48828		14.75	-0.7019
14.75	-0.24414		14.75	-0.5188		14.75	-0.79346
14.8125	-0.27466		14.8125	-0.33569		14.75	-0.85449
14.8438	-0.15259		14.8125	-0.36621		14.875	-0.64087
14.9062	-0.36621		14.875	-0.45776		14.875	-0.7019
14.9688	-0.30518		14.9375	-0.5188		15	-0.67139
15	-0.36621		15	-0.39673		15	-0.82397
15.0625	-0.30518		15.0625	-0.30518		15	-0.82397
15.0938	-0.30518		15.0625	-0.33569		15.125	-0.76294
15.1562	-0.27466		15.125	-0.36621		15.125	-0.67139
15.2188	-0.27466		15.1875	-0.42725		15.25	-0.67139
15.25	-0.21362		15.25	-0.27466		15.25	-0.7019
15.3125	-0.39673		15.3125	-0.39673		15.25	-0.7019
15.3438	-0.27466		15.3125	-0.21362		15.375	-0.76294
15.4062	-0.21362		15.375	-0.27466		15.375	-0.67139
15.4688	-0.24414		15.4375	-0.30518		15.5	-0.73242
15.5	-0.24414		15.5	-0.33569		15.5	-0.61035
15.5625	-0.33569		15.5625	-0.36621		15.5	-0.67139
15.5938	-0.39673		15.5625	-0.30518		15.625	-0.64087
15.6562	-0.21362		15.625	-0.21362		15.625	-0.7019
15.7188	-0.33569		15.6875	-0.24414		15.75	-0.76294
15.75	-0.27466		15.75	-0.30518		15.75	-0.54932
15.8125	-0.36621		15.8125	-0.39673		15.75	-0.67139
15.8438	-0.33569		15.8125	-0.27466		15.875	-0.67139
15.9062	-0.24414		15.875	-0.21362		15.875	-0.73242
15.9688	-0.27466		15.9375	-0.18311		16	-0.64087
16	-0.42725		16	-0.18311		16	-0.57983
16.0625	-0.36621		16.0625	-0.27466		16	-0.67139
16.0938	-0.36621		16.0625	-0.36621		16.125	-0.67139
16.1562	-0.30518		16.125	-0.33569		16.125	-0.67139
16.2188	-0.33569		16.1875	-0.33569		16.25	-0.57983
16.25	-0.42725		16.25	-0.18311		16.25	-0.54932
16.3125	-0.36621		16.3125	-0.36621		16.25	-0.57983
16.3438	-0.39673		16.3125	-0.33569		16.375	-0.67139
16.4062	-0.36621		16.375	-0.30518		16.375	-0.5188
16.4688	-0.36621		16.4375	-0.36621		16.5	-0.5188
16.5	-0.39673		16.5	-0.24414		16.5	-0.48828
16.5625	-0.33569		16.5625	-0.24414		16.5	-0.5188
16.5938	-0.45776		16.5625	-0.30518		16.625	-0.61035
16.6562	-0.42725		16.625	-0.33569		16.625	-0.45776
16.7188	-0.45776		16.6875	-0.39673		16.75	-0.54932
16.75	-0.30518		16.75	-0.33569		16.75	-0.54932
16.8125	-0.33569		16.8125	-0.30518		16.75	-0.54932
16.8438	-0.39673		16.8125	-0.33569		16.875	-0.57983
16.9062	-0.54932		16.875	-0.33569		16.875	-0.48828
16.9688	-0.48828		16.9375	-0.36621		17	-0.57983
17	-0.45776		17	-0.39673		17	-0.45776
17.0625	-0.33569		17.0625	-0.27466		17	-0.45776
17.0938	-0.39673		17.0625	-0.39673		17.125	-0.42725
17.1562	-0.54932		17.125	-0.36621		17.125	-0.45776
17.2188	-0.45776		17.1875	-0.36621		17.25	-0.54932
17.25	-0.45776		17.25	-0.42725		17.25	-0.64087
17.3125	-0.42725		17.3125	-0.33569		17.25	-0.48828
17.3438	-0.36621		17.3125	-0.36621		17.375	-0.48828
17.4062	-0.48828		17.375	-0.42725		17.375	-0.45776
17.4688	-0.42725		17.4375	-0.48828		17.5	-0.54932
17.5	-0.5188		17.5	-0.54932		17.5	-0.7019
17.5625	-0.48828		17.5625	-0.39673		17.5	-0.45776
17.5938	-0.45776		17.5625	-0.36621		17.625	-0.5188
17.6562	-0.39673		17.625	-0.42725		17.625	-0.42725
17.7188	-0.39673		17.6875	-0.48828		17.75	-0.48828
17.75	-0.5188		17.75	-0.54932		17.75	-0.54932
17.8125	-0.57983		17.8125	-0.30518		17.75	-0.48828
17.8438	-0.48828		17.8125	-0.42725		17.875	-0.54932
17.9062	-0.42725		17.875	-0.45776		17.875	-0.48828
17.9688	-0.39673		17.9375	-0.36621		18	-0.45776
18	-0.42725		18	-0.45776		18	-0.42725
18.0625	-0.57983		18.0625	-0.36621		18	-0.5188
18.0938	-0.39673		18.0625	-0.45776		18.125	-0.57983
18.1562	-0.5188		18.125	-0.5188		18.125	-0.57983
18.2188	-0.39673		18.1875	-0.45776		18.25	-0.30518
18.25	-0.42725		18.25	-0.39673		18.25	-0.33569
18.3125	-0.45776		18.3125	-0.42725		18.25	-0.45776
18.3438	-0.45776		18.3125	-0.48828		18.375	-0.57983
18.4062	-0.57983		18.375	-0.54932		18.375	-0.64087
18.4688	-0.45776		18.4375	-0.27466		18.5	-0.48828
18.5	-0.45776		18.5	-0.39673		18.5	-0.42725
18.5625	-0.42725		18.5625	-0.5188		18.5	-0.42725
18.5938	-0.5188		18.5625	-0.64087		18.625	-0.57983
18.6562	-0.5188		18.625	-0.5188		18.625	-0.54932
18.7188	-0.48828		18.6875	-0.36621		18.75	-0.48828
18.75	-0.39673		18.75	-0.39673		18.75	-0.45776
18.8125	-0.45776		18.8125	-0.61035		18.75	-0.45776
18.8438	-0.45776		18.8125	-0.54932		18.875	-0.45776
18.9062	-0.48828		18.875	-0.5188		18.875	-0.57983
18.9688	-0.5188		18.9375	-0.42725		19	-0.54932
19	-0.36621		19	-0.48828		19	-0.64087
19.0625	-0.57983		19.0625	-0.5188		19	-0.57983
19.0938	-0.5188		19.0625	-0.5188		19.125	-0.36621
19.1562	-0.48828		19.125	-0.48828		19.125	-0.48828
19.2188	-0.48828		19.1875	-0.5188		19.25	-0.48828
19.25	-0.45776		19.25	-0.54932		19.25	-0.57983
19.3125	-0.45776		19.3125	-0.48828		19.25	-0.54932
19.3438	-0.45776		19.3125	-0.36621		19.375	-0.45776
19.4062	-0.48828		19.375	-0.39673		19.375	-0.48828
19.4688	-0.5188		19.4375	-0.57983		19.5	-0.54932
19.5	-0.5188		19.5	-0.54932		19.5	-0.67139
19.5625	-0.45776		19.5625	-0.5188		19.5	-0.48828
19.5938	-0.39673		19.5625	-0.27466		19.625	-0.48828
19.6562	-0.39673		19.625	-0.45776		19.625	-0.45776
19.7188	-0.48828		19.6875	-0.61035		19.75	-0.48828
19.75	-0.42725		19.75	-0.57983		19.75	-0.5188
19.8125	-0.5188		19.8125	-0.5188		19.75	-0.57983
19.8438	-0.45776		19.8125	-0.39673		19.875	-0.57983
19.9062	-0.30518		19.875	-0.45776		19.875	-0.61035
19.9688	-0.48828		19.9375	-0.54932		20	-0.54932
20	-0.45776		20	-0.5188		20	-0.48828
20.0625	-0.5188		20.0625	-0.45776		20	-0.57983
20.0938	-0.42725		20.0625	-0.48828		20.125	-0.64087
20.1562	-0.24414		20.125	-0.54932		20.125	-0.67139
20.2188	-0.36621		20.1875	-0.45776		20.25	-0.54932
20.25	-0.45776		20.25	-0.42725		20.25	-0.5188
20.3125	-0.48828		20.3125	-0.45776		20.25	-0.5188
20.3438	-0.39673		20.3125	-0.54932		20.375	-0.61035
20.4062	-0.30518		20.375	-0.54932		20.375	-0.67139
20.4688	-0.36621		20.4375	-0.45776		20.5	-0.5188
20.5	-0.39673		20.5	-0.33569		20.5	-0.48828
20.5625	-0.42725		20.5625	-0.42725		20.5	-0.61035
20.5938	-0.48828		20.5625	-0.57983		20.625	-0.64087
20.6562	-0.42725		20.625	-0.54932		20.625	-0.7019
20.7188	-0.48828		20.6875	-0.39673		20.75	-0.7019
20.75	-0.33569		20.75	-0.39673		20.75	-0.64087
20.8125	-0.27466		20.8125	-0.5188		20.75	-0.73242
20.8438	-0.33569		20.8125	-0.48828		20.875	-0.7019
20.9062	-0.30518		20.875	-0.42725		20.875	-0.61035
20.9688	-0.45776		20.9375	-0.39673		21	-0.61035
21	-0.27466		21	-0.39673		21	-0.61035
21.0625	-0.30518		21.0625	-0.5188		21	-0.67139
21.0938	-0.39673		21.0625	-0.5188		21.125	-0.67139
21.1562	-0.39673		21.125	-0.36621		21.125	-0.61035
21.2188	-0.45776		21.1875	-0.45776		21.25	-0.67139
21.25	-0.24414		21.25	-0.48828		21.25	-0.67139
21.3125	-0.21362		21.3125	-0.42725		21.25	-0.7019
21.3438	-0.24414		21.3125	-0.39673		21.375	-0.64087
21.4062	-0.27466		21.375	-0.30518		21.375	-0.76294
21.4688	-0.24414		21.4375	-0.42725		21.5	-0.79346
21.5	-0.30518		21.5	-0.54932		21.5	-0.82397
21.5625	-0.21362		21.5625	-0.45776		21.5	-0.76294
21.5938	-0.27466		21.5625	-0.33569		21.625	-0.7019
21.6562	-0.33569		21.625	-0.39673		21.625	-0.7019
21.7188	-0.24414		21.6875	-0.5188		21.75	-0.79346
21.75	-0.24414		21.75	-0.39673		21.75	-0.73242
21.8125	-0.30518		21.8125	-0.21362		21.75	-0.67139
21.8438	-0.30518		21.8125	-0.27466		21.875	-0.7019
21.9062	-0.24414		21.875	-0.27466		21.875	-0.73242
21.9688	-0.21362		21.9375	-0.5188		22	-0.88501
22	-0.21362		22	-0.33569		22	-0.76294
22.0625	-0.33569		22.0625	-0.21362		22	-0.73242
22.0938	-0.27466		22.0625	-0.24414		22.125	-0.7019
22.1562	-0.21362		22.125	-0.30518		22.125	-0.73242
22.2188	-0.24414		22.1875	-0.36621		22.25	-0.7019
22.25	-0.27466		22.25	-0.30518		22.25	-0.73242
22.3125	-0.27466		22.3125	-0.30518		22.25	-0.7019
22.3438	-0.21362		22.3125	-0.39673		22.375	-0.67139
22.4062	-0.15259		22.375	-0.33569		22.375	-0.61035
22.4688	-0.18311		22.4375	-0.30518		22.5	-0.61035
22.5	-0.42725		22.5	-0.21362		22.5	-0.61035
22.5625	-0.36621		22.5625	-0.33569		22.5	-0.7019
22.5938	-0.30518		22.5625	-0.36621		22.625	-0.7019
22.6562	-0.24414		22.625	-0.27466		22.625	-0.73242
22.7188	-0.30518		22.6875	-0.15259		22.75	-0.57983
22.75	-0.39673		22.75	-0.15259		22.75	-0.57983
22.8125	-0.36621		22.8125	-0.33569		22.75	-0.61035
22.8438	-0.45776		22.8125	-0.42725		22.875	-0.7019
22.9062	-0.39673		22.875	-0.36621		22.875	-0.64087
22.9688	-0.42725		22.9375	-0.15259		23	-0.61035
23	-0.39673		23	-0.21362		23	-0.45776
23.0625	-0.39673		23.0625	-0.33569		23	-0.45776
23.0938	-0.48828		23.0625	-0.30518		23.125	-0.57983
23.1562	-0.48828		23.125	-0.21362		23.125	-0.54932
23.2188	-0.5188		23.1875	-0.18311		23.25	-0.54932
23.25	-0.30518		23.25	-0.27466		23.25	-0.42725
23.3125	-0.30518		23.3125	-0.21362		23.25	-0.39673
23.3438	-0.45776		23.3125	-0.30518		23.375	-0.33569
23.4062	-0.54932		23.375	-0.21362		23.375	-0.57983
23.4688	-0.61035		23.4375	-0.27466		23.5	-0.5188
23.5	-0.48828		23.5	-0.33569		23.5	-0.57983
23.5625	-0.45776		23.5625	-0.15259		23.5	-0.36621
23.5938	-0.48828		23.5625	-0.30518		23.625	-0.27466
23.6562	-0.61035		23.625	-0.33569		23.625	-0.36621
23.7188	-0.54932		23.6875	-0.39673		23.75	-0.42725
23.75	-0.57983		23.75	-0.39673		23.75	-0.45776
23.8125	-0.61035		23.8125	-0.30518		23.75	-0.39673
23.8438	-0.54932		23.8125	-0.33569		23.875	-0.18311
23.9062	-0.57983		23.875	-0.33569		23.875	-0.27466
23.9688	-0.64087		23.9375	-0.39673		24	-0.33569
24	-0.7019		24	-0.33569		24	-0.39673
24.0625	-0.82397		24.0625	-0.42725		24	-0.36621
24.0938	-0.73242		24.0625	-0.36621		24.125	-0.33569
24.1562	-0.54932		24.125	-0.30518		24.125	-0.30518
24.2188	-0.57983		24.1875	-0.39673		24.25	-0.36621
24.25	-0.67139		24.25	-0.45776		24.25	-0.24414
24.3125	-0.76294		24.3125	-0.42725		24.25	-0.39673
24.3438	-0.67139		24.3125	-0.48828		24.375	-0.36621
24.4062	-0.54932		24.375	-0.54932		24.375	-0.33569
24.4688	-0.61035		24.4375	-0.42725		24.5	-0.15259
24.5	-0.7019		24.5	-0.42725		24.5	-0.18311
24.5625	-0.7019		24.5625	-0.48828		24.5	-0.24414
24.5938	-0.67139		24.5625	-0.61035		24.625	-0.33569
24.6562	-0.64087		24.625	-0.57983		24.625	-0.39673
24.7188	-0.76294		24.6875	-0.54932		24.75	-0.21362
24.75	-0.82397		24.75	-0.45776		24.75	-0.15259
24.8125	-0.73242		24.8125	-0.57983		24.75	-0.27466
24.8438	-0.7019		24.8125	-0.7019		24.875	-0.36621
24.9062	-0.57983		24.875	-0.61035		24.875	-0.36621
24.9688	-0.7019		24.9375	-0.57983		25	-0.30518
25	-0.7019		25	-0.61035		25	-0.21362
25.0625	-0.61035		25.0625	-0.7019		25	-0.36621
25.0938	-0.64087		25.0625	-0.67139		25.125	-0.33569
25.1562	-0.67139		25.125	-0.67139		25.125	-0.15259
25.2188	-0.73242		25.1875	-0.61035		25.25	-0.30518
25.25	-0.64087		25.25	-0.64087		25.25	-0.21362
25.3125	-0.67139		25.3125	-0.7019		25.25	-0.30518
25.3438	-0.7019		25.3125	-0.67139		25.375	-0.27466
25.4062	-0.79346		25.375	-0.54932		25.375	-0.24414
25.4688	-0.79346		25.4375	-0.73242		25.5	-0.30518
25.5	-0.64087		25.5	-0.73242		25.5	-0.30518
25.5625	-0.64087		25.5625	-0.73242		25.5	-0.36621
25.5938	-0.7019		25.5625	-0.73242		25.625	-0.30518
25.6562	-0.79346		25.625	-0.57983		25.625	-0.30518
25.7188	-0.64087		25.6875	-0.76294		25.75	-0.33569
25.75	-0.67139		25.75	-0.76294		25.75	-0.39673
25.8125	-0.54932		25.8125	-0.7019		25.75	-0.33569
25.8438	-0.61035		25.8125	-0.67139		25.875	-0.33569
25.9062	-0.67139		25.875	-0.76294		25.875	-0.24414
25.9688	-0.64087		25.9375	-0.82397		26	-0.42725
26	-0.76294		26	-0.79346		26	-0.39673
26.0625	-0.54932		26.0625	-0.67139		26	-0.27466
26.0938	-0.61035		26.0625	-0.67139		26.125	-0.30518
26.1562	-0.57983		26.125	-0.76294		26.125	-0.36621
26.2188	-0.64087		26.1875	-0.88501		26.25	-0.45776
26.25	-0.7019		26.25	-0.79346		26.25	-0.45776
26.3125	-0.64087		26.3125	-0.61035		26.25	-0.30518
26.3438	-0.5188		26.3125	-0.7019		26.375	-0.36621
26.4062	-0.5188		26.375	-0.73242		26.375	-0.33569
26.4688	-0.5188		26.4375	-0.79346		26.5	-0.48828
26.5	-0.54932		26.5	-0.79346		26.5	-0.45776
26.5625	-0.64087		26.5625	-0.64087		26.5	-0.36621
26.5938	-0.5188		26.5625	-0.67139		26.625	-0.42725
26.6562	-0.48828		26.625	-0.64087		26.625	-0.45776
26.7188	-0.42725		26.6875	-0.67139		26.75	-0.42725
26.75	-0.5188		26.75	-0.7019		26.75	-0.48828
26.8125	-0.57983		26.8125	-0.73242		26.75	-0.39673
26.8438	-0.54932		26.8125	-0.76294		26.875	-0.45776
26.9062	-0.61035		26.875	-0.64087		26.875	-0.39673
26.9688	-0.5188		26.9375	-0.61035		27	-0.24414
27	-0.5188		27	-0.7019		27	-0.42725
27.0625	-0.54932		27.0625	-0.73242		27	-0.48828
27.0938	-0.54932		27.0625	-0.76294		27.125	-0.57983
27.1562	-0.64087		27.125	-0.64087		27.125	-0.48828
27.2188	-0.61035		27.1875	-0.45776		27.25	-0.36621
27.25	-0.48828		27.25	-0.61035		27.25	-0.45776
27.3125	-0.54932		27.3125	-0.64087		27.25	-0.54932
27.3438	-0.48828		27.3125	-0.64087		27.375	-0.57983
27.4062	-0.57983		27.375	-0.67139		27.375	-0.45776
27.4688	-0.57983		27.4375	-0.48828		27.5	-0.42725
27.5	-0.39673		27.5	-0.57983		27.5	-0.42725
27.5625	-0.54932		27.5625	-0.57983		27.5	-0.5188
27.5938	-0.48828		27.5625	-0.64087		27.625	-0.5188
27.6562	-0.61035		27.625	-0.61035		27.625	-0.57983
27.7188	-0.54932		27.6875	-0.61035		27.75	-0.45776
27.75	-0.48828		27.75	-0.67139		27.75	-0.48828
27.8125	-0.54932		27.8125	-0.54932		27.75	-0.42725
27.8438	-0.61035		27.8125	-0.48828		27.875	-0.42725
27.9062	-0.61035		27.875	-0.61035		27.875	-0.54932
27.9688	-0.48828		27.9375	-0.61035		28	-0.54932
28	-0.48828		28	-0.61035		28	-0.61035
28.0625	-0.48828		28.0625	-0.5188		28	-0.39673
28.0938	-0.54932		28.0625	-0.36621		28.125	-0.39673
28.1562	-0.54932		28.125	-0.54932		28.125	-0.5188
28.2188	-0.54932		28.1875	-0.61035		28.25	-0.61035
28.25	-0.39673		28.25	-0.61035		28.25	-0.54932
28.3125	-0.45776		28.3125	-0.54932		28.25	-0.5188
28.3438	-0.48828		28.3125	-0.42725		28.375	-0.33569
28.4062	-0.42725		28.375	-0.57983		28.375	-0.48828
28.4688	-0.61035		28.4375	-0.67139		28.5	-0.57983
28.5	-0.54932		28.5	-0.57983		28.5	-0.48828
28.5625	-0.57983		28.5625	-0.54932		28.5	-0.57983
28.5938	-0.48828		28.5625	-0.48828		28.625	-0.42725
28.6562	-0.42725		28.625	-0.57983		28.625	-0.42725
28.7188	-0.54932		28.6875	-0.57983		28.75	-0.45776
28.75	-0.61035		28.75	-0.48828		28.75	-0.45776
28.8125	-0.54932		28.8125	-0.54932		28.75	-0.48828
28.8438	-0.45776		28.8125	-0.5188		28.875	-0.48828
28.9062	-0.33569		28.875	-0.54932		28.875	-0.45776
28.9688	-0.5188		28.9375	-0.54932		29	-0.30518
29	-0.61035		29	-0.5188		29	-0.33569
29.0625	-0.64087		29.0625	-0.54932		29	-0.5188
29.0938	-0.57983		29.0625	-0.61035		29.125	-0.5188
29.1562	-0.42725		29.125	-0.48828		29.125	-0.5188
29.2188	-0.5188		29.1875	-0.54932		29.25	-0.39673
29.25	-0.54932		29.25	-0.5188		29.25	-0.30518
29.3125	-0.5188		29.3125	-0.61035		29.25	-0.48828
29.3438	-0.57983		29.3125	-0.5188		29.375	-0.48828
29.4062	-0.61035		29.375	-0.5188		29.375	-0.45776
29.4688	-0.5188		29.4375	-0.42725		29.5	-0.39673
29.5	-0.45776		29.5	-0.48828		29.5	-0.33569
29.5625	-0.48828		29.5625	-0.67139		29.5	-0.48828
29.5938	-0.61035		29.5625	-0.5188		29.625	-0.45776
29.6562	-0.54932		29.625	-0.5188		29.625	-0.39673
29.7188	-0.61035		29.6875	-0.48828		29.75	-0.45776
29.75	-0.42725		29.75	-0.5188		29.75	-0.33569
29.8125	-0.39673		29.8125	-0.5188		29.75	-0.42725
29.8438	-0.54932		29.8125	-0.64087		29.875	-0.30518
29.9062	-0.61035		29.875	-0.57983		29.875	-0.42725
29.9688	-0.54932		29.9375	-0.57983		30	-0.42725
30	-0.5188		30	-0.36621		30	-0.36621
30.0625	-0.42725		30.0625	-0.42725		30	-0.39673
30.0938	-0.54932		30.0625	-0.64087		30.125	-0.33569
30.1562	-0.61035		30.125	-0.54932		30.125	-0.36621
30.2188	-0.54932		30.1875	-0.61035		30.25	-0.42725
30.25	-0.67139		30.25	-0.45776		30.25	-0.39673
30.3125	-0.57983		30.3125	-0.5188		30.25	-0.36621
30.3438	-0.64087		30.3125	-0.48828		30.375	-0.36621
30.4062	-0.5188		30.375	-0.57983		30.375	-0.33569
30.4688	-0.54932		30.4375	-0.64087		30.5	-0.39673
30.5	-0.57983		30.5	-0.48828		30.5	-0.27466
30.5625	-0.57983		30.5625	-0.36621		30.5	-0.36621
30.5938	-0.64087		30.5625	-0.48828		30.625	-0.27466
30.6562	-0.54932		30.625	-0.57983		30.625	-0.33569
30.7188	-0.61035		30.6875	-0.57983		30.75	-0.33569
30.75	-0.64087		30.75	-0.54932		30.75	-0.24414
30.8125	-0.67139		30.8125	-0.57983		30.75	-0.30518
30.8438	-0.57983		30.8125	-0.57983		30.875	-0.30518
30.9062	-0.64087		30.875	-0.5188		30.875	-0.30518
30.9688	-0.67139		30.9375	-0.54932		31	-0.36621
31	-0.79346		31	-0.5188		31	-0.27466
31.0625	-0.64087		31.0625	-0.61035		31	-0.36621
31.0938	-0.64087		31.0625	-0.64087		31.125	-0.27466
31.1562	-0.57983		31.125	-0.42725		31.125	-0.24414
31.2188	-0.64087		31.1875	-0.5188		31.25	-0.24414
31.25	-0.76294		31.25	-0.64087		31.25	-0.24414
31.3125	-0.64087		31.3125	-0.67139		31.25	-0.24414
31.3438	-0.64087		31.3125	-0.73242		31.375	-0.24414
31.4062	-0.64087		31.375	-0.48828		31.375	-0.15259
31.4688	-0.67139		31.4375	-0.54932		31.5	-0.12207
31.5	-0.79346		31.5	-0.61035		31.5	-0.18311
31.5625	-0.82397		31.5625	-0.7019		31.5	-0.33569
31.5938	-0.85449		31.5625	-0.57983		31.625	-0.27466
31.6562	-0.82397		31.625	-0.64087		31.625	-0.21362
31.7188	-0.67139		31.6875	-0.54932		31.75	-0.12207
31.75	-0.64087		31.75	-0.54932		31.75	-0.15259
31.8125	-0.61035		31.8125	-0.57983		31.75	-0.24414
31.8438	-0.73242		31.8125	-0.64087		31.875	-0.21362
31.9062	-0.82397		31.875	-0.7019		31.875	-0.21362
31.9688	-0.79346		31.9375	-0.64087		32	-0.21362
32	-0.64087		32	-0.7019		32	-0.21362
32.0625	-0.64087		32.0625	-0.57983		32	-0.24414
32.0938	-0.76294		32.0625	-0.76294		32.125	-0.21362
32.1562	-0.85449		32.125	-0.64087		32.125	-0.21362
32.2188	-0.67139		32.1875	-0.7019		32.25	-0.21362
32.25	-0.7019		32.25	-0.57983		32.25	-0.18311
32.3125	-0.61035		32.3125	-0.64087		32.25	-0.12207
32.3438	-0.67139		32.3125	-0.7019		32.375	-0.27466
32.4062	-0.73242		32.375	-0.73242		32.375	-0.36621
32.4688	-0.73242		32.4375	-0.76294		32.5	-0.36621
32.5	-0.76294		32.5	-0.76294		32.5	-0.33569
32.5625	-0.7019		32.5625	-0.67139		32.5	-0.12207
32.5938	-0.67139		32.5625	-0.73242		32.625	-0.24414
32.6562	-0.64087		32.625	-0.67139		32.625	-0.36621
32.7188	-0.7019		32.6875	-0.7019		32.75	-0.48828
32.75	-0.7019		32.75	-0.73242		32.75	-0.36621
32.8125	-0.76294		32.8125	-0.67139		32.75	-0.30518
32.8438	-0.67139		32.8125	-0.67139		32.875	-0.30518
32.9062	-0.57983		32.875	-0.67139		32.875	-0.42725
32.9688	-0.57983		32.9375	-0.7019		33	-0.48828
33	-0.64087		33	-0.73242		33	-0.45776
33.0625	-0.67139		33.0625	-0.85449		33	-0.45776
33.0938	-0.5188		33.0625	-0.73242		33.125	-0.42725
33.1562	-0.45776		33.125	-0.76294		33.125	-0.39673
33.2188	-0.54932		33.1875	-0.76294		33.25	-0.42725
33.25	-0.61035		33.25	-0.79346		33.25	-0.5188
33.3125	-0.61035		33.3125	-0.67139		33.25	-0.5188
33.3438	-0.5188		33.3125	-0.79346		33.375	-0.64087
33.4062	-0.45776		33.375	-0.67139		33.375	-0.42725
33.4688	-0.45776		33.4375	-0.76294		33.5	-0.42725
33.5	-0.54932		33.5	-0.76294		33.5	-0.45776
33.5625	-0.42725		33.5625	-0.76294		33.5	-0.61035
33.5938	-0.45776		33.5625	-0.7019		33.625	-0.64087
33.6562	-0.39673		33.625	-0.67139		33.625	-0.48828
33.7188	-0.45776		33.6875	-0.64087		33.75	-0.45776
33.75	-0.36621		33.75	-0.76294		33.75	-0.45776
33.8125	-0.42725		33.8125	-0.79346		33.75	-0.76294
33.8438	-0.39673		33.8125	-0.67139		33.875	-0.79346
33.9062	-0.39673		33.875	-0.61035		33.875	-0.76294
33.9688	-0.39673		33.9375	-0.64087		34	-0.67139
34	-0.30518		34	-0.67139		34	-0.54932
34.0625	-0.27466		34.0625	-0.67139		34	-0.7019
34.0938	-0.45776		34.0625	-0.61035		34.125	-0.61035
34.1562	-0.39673		34.125	-0.48828		34.125	-0.67139
34.2188	-0.39673		34.1875	-0.54932		34.25	-0.7019
34.25	-0.33569		34.25	-0.57983		34.25	-0.67139
34.3125	-0.27466		34.3125	-0.57983		34.25	-0.67139
34.3438	-0.39673		34.3125	-0.54932		34.375	-0.64087
34.4062	-0.42725		34.375	-0.57983		34.375	-0.7019
34.4688	-0.27466		34.4375	-0.64087		34.5	-0.82397
34.5	-0.24414		34.5	-0.5188		34.5	-0.82397
34.5625	-0.15259		34.5625	-0.45776		34.5	-0.67139
34.5938	-0.30518		34.5625	-0.39673		34.625	-0.73242
34.6562	-0.36621		34.625	-0.5188		34.625	-0.7019
34.7188	-0.36621		34.6875	-0.61035		34.75	-0.79346
34.75	-0.39673		34.75	-0.48828		34.75	-0.7019
34.8125	-0.24414		34.8125	-0.27466		34.75	-0.61035
34.8438	-0.27466		34.8125	-0.33569		34.875	-0.67139
34.9062	-0.30518		34.875	-0.48828		34.875	-0.7019
34.9688	-0.33569		34.9375	-0.5188		35	-0.76294
35	-0.36621		35	-0.45776		35	-0.67139
35.0625	-0.27466		35.0625	-0.27466		35	-0.7019
35.0938	-0.15259		35.0625	-0.24414		35.125	-0.73242
35.1562	-0.27466		35.125	-0.33569		35.125	-0.73242
35.2188	-0.21362		35.1875	-0.42725		35.25	-0.73242
35.25	-0.33569		35.25	-0.30518		35.25	-0.73242
35.3125	-0.27466		35.3125	-0.36621		35.25	-0.73242
35.3438	-0.21362		35.3125	-0.36621		35.375	-0.76294
35.4062	-0.30518		35.375	-0.27466		35.375	-0.76294
35.4688	-0.24414		35.4375	-0.21362		35.5	-0.64087
35.5	-0.33569		35.5	-0.24414		35.5	-0.64087
35.5625	-0.36621		35.5625	-0.30518		35.5	-0.64087
35.5938	-0.42725		35.5625	-0.45776		35.625	-0.73242
35.6562	-0.45776		35.625	-0.24414		35.625	-0.61035
35.7188	-0.21362		35.6875	-0.12207		35.75	-0.64087
35.75	-0.24414		35.75	-0.21362		35.75	-0.73242
35.8125	-0.33569		35.8125	-0.30518		35.75	-0.7019
35.8438	-0.36621		35.8125	-0.36621		35.875	-0.73242
35.9062	-0.45776		35.875	-0.24414		35.875	-0.57983
35.9688	-0.30518		35.9375	-0.15259		36	-0.57983
36	-0.21362		36	-0.24414		36	-0.73242
36.0625	-0.39673		36.0625	-0.33569		36	-0.67139
36.0938	-0.33569		36.0625	-0.36621		36.125	-0.61035
36.1562	-0.42725		36.125	-0.18311		36.125	-0.57983
36.2188	-0.39673		36.1875	-0.24414		36.25	-0.48828
36.25	-0.27466		36.25	-0.33569		36.25	-0.64087
36.3125	-0.39673		36.3125	-0.30518		36.25	-0.61035
36.3438	-0.39673		36.3125	-0.21362		36.375	-0.61035
36.4062	-0.48828		36.375	-0.24414		36.375	-0.5188
36.4688	-0.45776		36.4375	-0.24414		36.5	-0.5188
36.5	-0.33569		36.5	-0.42725		36.5	-0.57983
36.5625	-0.39673		36.5625	-0.27466		36.5	-0.54932
36.5938	-0.48828		36.5625	-0.18311		36.625	-0.54932
36.6562	-0.42725		36.625	-0.24414		36.625	-0.57983
36.7188	-0.48828		36.6875	-0.36621		36.75	-0.57983
36.75	-0.39673		36.75	-0.30518		36.75	-0.45776
36.8125	-0.45776		36.8125	-0.24414		36.75	-0.42725
36.8438	-0.5188		36.8125	-0.24414		36.875	-0.45776
36.9062	-0.42725		36.875	-0.36621		36.875	-0.61035
36.9688	-0.48828		36.9375	-0.36621		37	-0.54932
37	-0.39673		37	-0.42725		37	-0.48828
37.0625	-0.45776		37.0625	-0.18311		37	-0.45776
37.0938	-0.45776		37.0625	-0.24414		37.125	-0.45776
37.1562	-0.39673		37.125	-0.45776		37.125	-0.64087
37.2188	-0.48828		37.1875	-0.39673		37.25	-0.61035
37.25	-0.48828		37.25	-0.30518		37.25	-0.57983
37.3125	-0.5188		37.3125	-0.30518		37.25	-0.45776
37.3438	-0.33569		37.3125	-0.30518		37.375	-0.45776
37.4062	-0.39673		37.375	-0.54932		37.375	-0.5188
37.4688	-0.5188		37.4375	-0.48828		37.5	-0.48828
37.5	-0.57983		37.5	-0.33569		37.5	-0.5188
37.5625	-0.45776		37.5625	-0.42725		37.5	-0.54932
37.5938	-0.39673		37.5625	-0.39673		37.625	-0.39673
37.6562	-0.33569		37.625	-0.45776		37.625	-0.45776
37.7188	-0.45776		37.6875	-0.36621		37.75	-0.5188
37.75	-0.57983		37.75	-0.42725		37.75	-0.54932
37.8125	-0.45776		37.8125	-0.54932		37.75	-0.67139
37.8438	-0.48828		37.8125	-0.48828		37.875	-0.57983
37.9062	-0.39673		37.875	-0.39673		37.875	-0.42725
37.9688	-0.45776		37.9375	-0.33569		38	-0.39673
38	-0.48828		38	-0.42725		38	-0.48828
38.0625	-0.5188		38.0625	-0.57983		38	-0.67139
38.0938	-0.57983		38.0625	-0.5188		38.125	-0.54932
38.1562	-0.61035		38.125	-0.27466		38.125	-0.5188
38.2188	-0.48828		38.1875	-0.36621		38.25	-0.39673
38.25	-0.39673		38.25	-0.39673		38.25	-0.5188
38.3125	-0.45776		38.3125	-0.61035		38.25	-0.64087
38.3438	-0.54932		38.3125	-0.5188		38.375	-0.48828
38.4062	-0.54932		38.375	-0.42725		38.375	-0.5188
38.4688	-0.54932		38.4375	-0.42725		38.5	-0.42725
38.5	-0.42725		38.5	-0.48828		38.5	-0.39673
38.5625	-0.33569		38.5625	-0.45776		38.5	-0.48828
38.5938	-0.5188		38.5625	-0.48828		38.625	-0.48828
38.6562	-0.54932		38.625	-0.45776		38.625	-0.48828
38.7188	-0.45776		38.6875	-0.57983		38.75	-0.61035
38.75	-0.45776		38.75	-0.45776		38.75	-0.45776
38.8125	-0.30518		38.8125	-0.45776		38.75	-0.45776
38.8438	-0.48828		38.8125	-0.48828		38.875	-0.48828
38.9062	-0.48828		38.875	-0.48828		38.875	-0.54932
38.9688	-0.42725		38.9375	-0.67139		39	-0.61035
39	-0.57983		39	-0.42725		39	-0.48828
39.0625	-0.45776		39.0625	-0.33569		39	-0.45776
39.0938	-0.54932		39.0625	-0.39673		39.125	-0.45776
39.1562	-0.39673		39.125	-0.54932		39.125	-0.48828
39.2188	-0.42725		39.1875	-0.61035		39.25	-0.54932
39.25	-0.5188		39.25	-0.57983		39.25	-0.54932
39.3125	-0.48828		39.3125	-0.33569		39.25	-0.54932
39.3438	-0.42725		39.3125	-0.45776		39.375	-0.5188
39.4062	-0.42725		39.375	-0.61035		39.375	-0.45776
39.4688	-0.42725		39.4375	-0.54932		39.5	-0.61035
39.5	-0.5188		39.5	-0.45776		39.5	-0.5188
39.5625	-0.45776		39.5625	-0.45776		39.5	-0.57983
39.5938	-0.36621		39.5625	-0.57983		39.625	-0.5188
39.6562	-0.42725		39.625	-0.42725		39.625	-0.61035
39.7188	-0.48828		39.6875	-0.5188		39.75	-0.54932
39.75	-0.57983		39.75	-0.42725		39.75	-0.48828
39.8125	-0.42725		39.8125	-0.5188		39.75	-0.67139
39.8438	-0.42725		39.8125	-0.61035		39.875	-0.61035
39.9062	-0.39673		39.875	-0.42725		39.875	-0.5188
39.9688	-0.45776		39.9375	-0.39673		40	-0.5188
40	-0.54932		40	-0.45776		40	-0.48828
40.0625	-0.33569		40.0625	-0.5188		40	-0.54932
40.0938	-0.39673		40.0625	-0.57983		40.125	-0.67139
40.1562	-0.36621		40.125	-0.45776		40.125	-0.48828
40.2188	-0.39673		40.1875	-0.42725		40.25	-0.61035
40.25	-0.42725		40.25	-0.5188		40.25	-0.57983
40.3125	-0.42725		40.3125	-0.45776		40.25	-0.57983
40.3438	-0.39673		40.3125	-0.45776		40.375	-0.54932
40.4062	-0.45776		40.375	-0.45776		40.375	-0.5188
40.4688	-0.39673		40.4375	-0.45776		40.5	-0.57983
40.5	-0.36621		40.5	-0.5188		40.5	-0.67139
40.5625	-0.39673		40.5625	-0.42725		40.5	-0.7019
40.5938	-0.42725		40.5625	-0.61035		40.625	-0.61035
40.6562	-0.48828		40.625	-0.48828		40.625	-0.61035
40.7188	-0.36621		40.6875	-0.39673		40.75	-0.61035
40.75	-0.24414		40.75	-0.45776		40.75	-0.7019
40.8125	-0.27466		40.8125	-0.45776		40.75	-0.64087
40.8438	-0.39673		40.8125	-0.54932		40.875	-0.67139
40.9062	-0.42725		40.875	-0.45776		40.875	-0.61035
40.9688	-0.39673		40.9375	-0.5188		41	-0.67139
41	-0.27466		41	-0.39673		41	-0.64087
41.0625	-0.30518		41.0625	-0.39673		41	-0.61035
41.0938	-0.39673		41.0625	-0.45776		41.125	-0.76294
41.1562	-0.36621		41.125	-0.45776		41.125	-0.7019
41.2188	-0.30518		41.1875	-0.5188		41.25	-0.79346
41.25	-0.33569		41.25	-0.39673		41.25	-0.54932
41.3125	-0.27466		41.3125	-0.27466		41.25	-0.61035
41.3438	-0.18311		41.3125	-0.45776		41.375	-0.67139
41.4062	-0.21362		41.375	-0.54932		41.375	-0.82397
41.4688	-0.39673		41.4375	-0.48828		41.5	-0.79346
41.5	-0.30518		41.5	-0.48828		41.5	-0.76294
41.5625	-0.42725		41.5625	-0.27466		41.5	-0.7019
41.5938	-0.21362		41.5625	-0.42725		41.625	-0.82397
41.6562	-0.21362		41.625	-0.48828		41.625	-0.85449
41.7188	-0.30518		41.6875	-0.45776		41.75	-0.76294
41.75	-0.39673		41.75	-0.36621		41.75	-0.73242
41.8125	-0.39673		41.8125	-0.27466		41.75	-0.64087
41.8438	-0.21362		41.8125	-0.36621		41.875	-0.73242
41.9062	-0.24414		41.875	-0.27466		41.875	-0.79346
41.9688	-0.27466		41.9375	-0.33569		42	-0.79346
42	-0.36621		42	-0.39673		42	-0.79346
42.0625	-0.30518		42.0625	-0.33569		42	-0.76294
42.0938	-0.30518		42.0625	-0.27466		42.125	-0.7019
42.1562	-0.24414		42.125	-0.24414		42.125	-0.67139
42.2188	-0.27466		42.1875	-0.27466		42.25	-0.7019
42.25	-0.18311		42.25	-0.39673		42.25	-0.79346
42.3125	-0.27466		42.3125	-0.39673		42.25	-0.73242
42.3438	-0.27466		42.3125	-0.30518		42.375	-0.7019
42.4062	-0.33569		42.375	-0.15259		42.375	-0.57983
42.4688	-0.33569		42.4375	-0.15259		42.5	-0.67139
42.5	-0.27466		42.5	-0.33569		42.5	-0.73242
42.5625	-0.33569		42.5625	-0.33569		42.5	-0.85449
42.5938	-0.24414		42.5625	-0.33569		42.625	-0.73242
42.6562	-0.36621		42.625	-0.15259		42.625	-0.61035
42.7188	-0.21362		42.6875	-0.15259		42.75	-0.54932
42.75	-0.33569		42.75	-0.27466		42.75	-0.7019
42.8125	-0.42725		42.8125	-0.27466		42.75	-0.79346
42.8438	-0.42725		42.8125	-0.30518		42.875	-0.7019
42.9062	-0.39673		42.875	-0.33569		42.875	-0.61035
42.9688	-0.33569		42.9375	-0.30518		43	-0.57983
43	-0.36621		43	-0.18311		43	-0.61035
43.0625	-0.33569		43.0625	-0.24414		43	-0.5188
43.0938	-0.45776		43.0625	-0.12207		43.125	-0.5188
43.1562	-0.45776		43.125	-0.24414		43.125	-0.54932
43.2188	-0.42725		43.1875	-0.33569		43.25	-0.57983
43.25	-0.39673		43.25	-0.12207		43.25	-0.45776
43.3125	-0.33569		43.3125	-0.15259		43.25	-0.42725
43.3438	-0.42725		43.3125	-0.15259		43.375	-0.33569
43.4062	-0.45776		43.375	-0.33569		43.375	-0.48828
43.4688	-0.5188		43.4375	-0.33569		43.5	-0.57983
43.5	-0.54932		43.5	-0.24414		43.5	-0.42725
43.5625	-0.36621		43.5625	-0.18311		43.5	-0.30518
43.5938	-0.45776		43.5625	-0.24414		43.625	-0.39673
43.6562	-0.57983		43.625	-0.33569		43.625	-0.42725
43.7188	-0.7019		43.6875	-0.24414		43.75	-0.48828
43.75	-0.67139		43.75	-0.30518		43.75	-0.36621
43.8125	-0.64087		43.8125	-0.27466		43.75	-0.27466
43.8438	-0.42725		43.8125	-0.30518		43.875	-0.27466
43.9062	-0.54932		43.875	-0.33569		43.875	-0.36621
43.9688	-0.7019		43.9375	-0.36621		44	-0.24414
44	-0.76294		44	-0.27466		44	-0.27466
44.0625	-0.7019		44.0625	-0.39673		44	-0.24414
44.0938	-0.5188		44.0625	-0.36621		44.125	-0.30518
44.1562	-0.5188		44.125	-0.36621		44.125	-0.27466
44.2188	-0.64087		44.1875	-0.39673		44.25	-0.30518
44.25	-0.79346		44.25	-0.42725		44.25	-0.24414
44.3125	-0.7019		44.3125	-0.5188		44.25	-0.36621
44.3438	-0.7019		44.3125	-0.45776		44.375	-0.36621
44.4062	-0.7019		44.375	-0.45776		44.375	-0.15259
44.4688	-0.64087		44.4375	-0.42725		44.5	-0.21362
44.5	-0.7019		44.5	-0.54932		44.5	-0.18311
44.5625	-0.76294		44.5625	-0.61035		44.5	-0.30518
44.5938	-0.73242		44.5625	-0.64087		44.625	-0.30518
44.6562	-0.79346		44.625	-0.45776		44.625	-0.24414
44.7188	-0.67139		44.6875	-0.48828		44.75	-0.24414
44.75	-0.57983		44.75	-0.64087		44.75	-0.27466
44.8125	-0.61035		44.8125	-0.61035		44.75	-0.30518
44.8438	-0.67139		44.8125	-0.61035		44.875	-0.27466
44.9062	-0.79346		44.875	-0.39673		44.875	-0.18311
44.9688	-0.73242		44.9375	-0.5188		45	-0.33569
45	-0.64087		45	-0.61035		45	-0.39673
45.0625	-0.67139		45.0625	-0.64087		45	-0.36621
45.0938	-0.73242		45.0625	-0.57983		45.125	-0.33569
45.1562	-0.82397		45.125	-0.64087		45.125	-0.27466
45.2188	-0.76294		45.1875	-0.64087		45.25	-0.27466
45.25	-0.61035		45.25	-0.64087		45.25	-0.36621
45.3125	-0.7019		45.3125	-0.67139		45.25	-0.18311
45.3438	-0.76294		45.3125	-0.61035		45.375	-0.27466
45.4062	-0.64087		45.375	-0.7019		45.375	-0.24414
45.4688	-0.67139		45.4375	-0.7019		45.5	-0.33569
45.5	-0.61035		45.5	-0.64087		45.5	-0.33569
45.5625	-0.73242		45.5625	-0.61035		45.5	-0.30518
45.5938	-0.7019		45.5625	-0.7019		45.625	-0.36621
45.6562	-0.67139		45.625	-0.82397		45.625	-0.39673
45.7188	-0.67139		45.6875	-0.79346		45.75	-0.33569
45.75	-0.7019		45.75	-0.73242		45.75	-0.24414
45.8125	-0.7019		45.8125	-0.57983		45.75	-0.21362
45.8438	-0.57983		45.8125	-0.67139		45.875	-0.45776
45.9062	-0.64087		45.875	-0.85449		45.875	-0.48828
45.9688	-0.7019		45.9375	-0.82397		46	-0.33569
46	-0.64087		46	-0.76294		46	-0.30518
46.0625	-0.64087		46.0625	-0.64087		46	-0.27466
46.0938	-0.5188		46.0625	-0.67139		46.125	-0.33569
46.1562	-0.54932		46.125	-0.73242		46.125	-0.54932
46.2188	-0.7019		46.1875	-0.73242		46.25	-0.33569
46.25	-0.73242		46.25	-0.7019		46.25	-0.42725
46.3125	-0.54932		46.3125	-0.73242		46.25	-0.33569
46.3438	-0.54932		46.3125	-0.7019		46.375	-0.33569
46.4062	-0.48828		46.375	-0.67139		46.375	-0.42725
46.4688	-0.7019		46.4375	-0.73242		46.5	-0.5188
46.5	-0.67139		46.5	-0.73242		46.5	-0.48828
46.5625	-0.67139		46.5625	-0.76294		46.5	-0.5188
46.5938	-0.64087		46.5625	-0.54932		46.625	-0.27466
46.6562	-0.48828		46.625	-0.64087		46.625	-0.39673
46.7188	-0.57983		46.6875	-0.7019		46.75	-0.48828
46.75	-0.54932		46.75	-0.67139		46.75	-0.45776
46.8125	-0.57983		46.8125	-0.7019		46.75	-0.5188
46.8438	-0.64087		46.8125	-0.7019		46.875	-0.30518
46.9062	-0.64087		46.875	-0.7019		46.875	-0.36621
46.9688	-0.48828		46.9375	-0.67139		47	-0.39673
47	-0.5188		47	-0.64087		47	-0.45776
47.0625	-0.5188		47.0625	-0.67139		47	-0.57983
47.0938	-0.67139		47.0625	-0.61035		47.125	-0.48828
47.1562	-0.61035		47.125	-0.67139		47.125	-0.42725
47.2188	-0.45776		47.1875	-0.7019		47.25	-0.36621
47.25	-0.45776		47.25	-0.64087		47.25	-0.45776
47.3125	-0.39673		47.3125	-0.64087		47.25	-0.5188
47.3438	-0.57983		47.3125	-0.57983		47.375	-0.45776
47.4062	-0.5188		47.375	-0.7019		47.375	-0.45776
47.4688	-0.5188		47.4375	-0.7019		47.5	-0.39673
47.5	-0.42725		47.5	-0.48828		47.5	-0.36621
47.5625	-0.39673		47.5625	-0.5188		47.5	-0.48828
47.5938	-0.54932		47.5625	-0.61035		47.625	-0.54932
47.6562	-0.45776		47.625	-0.64087		47.625	-0.48828
47.7188	-0.5188		47.6875	-0.67139		47.75	-0.48828
47.75	-0.61035		47.75	-0.5188		47.75	-0.24414
47.8125	-0.57983		47.8125	-0.57983		47.75	-0.45776
47.8438	-0.48828		47.8125	-0.64087		47.875	-0.42725
47.9062	-0.5188		47.875	-0.57983		47.875	-0.54932
47.9688	-0.45776		47.9375	-0.57983		48	-0.54932
48	-0.61035		48	-0.45776		48	-0.36621
48.0625	-0.54932		48.0625	-0.5188		48	-0.39673
48.0938	-0.42725		48.0625	-0.64087		48.125	-0.48828
48.1562	-0.5188		48.125	-0.54932		48.125	-0.54932
48.2188	-0.48828		48.1875	-0.54932		48.25	-0.5188
48.25	-0.67139		48.25	-0.5188		48.25	-0.5188
48.3125	-0.57983		48.3125	-0.5188		48.25	-0.45776
48.3438	-0.5188		48.3125	-0.5188		48.375	-0.5188
48.4062	-0.5188		48.375	-0.48828		48.375	-0.5188
48.4688	-0.54932		48.4375	-0.61035		48.5	-0.54932
48.5	-0.54932		48.5	-0.5188		48.5	-0.54932
48.5625	-0.42725		48.5625	-0.48828		48.5	-0.48828
48.5938	-0.42725		48.5625	-0.5188		48.625	-0.5188
48.6562	-0.5188		48.625	-0.5188		48.625	-0.39673
48.7188	-0.54932		48.6875	-0.61035		48.75	-0.5188
48.75	-0.61035		48.75	-0.57983		48.75	-0.54932
48.8125	-0.5188		48.8125	-0.42725		48.75	-0.57983
48.8438	-0.54932		48.8125	-0.45776		48.875	-0.54932
48.9062	-0.61035		48.875	-0.42725		48.875	-0.39673
48.9688	-0.5188		48.9375	-0.54932		49	-0.39673
49	-0.57983		49	-0.64087		49	-0.45776
49.0625	-0.54932		49.0625	-0.48828		49	-0.48828
49.0938	-0.5188		49.0625	-0.61035		49.125	-0.42725
49.1562	-0.54932		49.125	-0.48828		49.125	-0.36621
49.2188	-0.42725		49.1875	-0.48828		49.25	-0.45776
49.25	-0.42725		49.25	-0.54932		49.25	-0.48828
49.3125	-0.57983		49.3125	-0.57983		49.25	-0.48828
49.3438	-0.57983		49.3125	-0.5188		49.375	-0.57983
49.4062	-0.61035		49.375	-0.48828		49.375	-0.36621
49.4688	-0.39673		49.4375	-0.42725		49.5	-0.45776
49.5	-0.36621		49.5	-0.54932		49.5	-0.48828
49.5625	-0.48828		49.5625	-0.54932		49.5	-0.33569
49.5938	-0.5188		49.5625	-0.64087		49.625	-0.48828
49.6562	-0.57983		49.625	-0.61035		49.625	-0.39673
49.7188	-0.48828		49.6875	-0.48828		49.75	-0.48828
49.75	-0.39673		49.75	-0.5188		49.75	-0.45776
49.8125	-0.42725		49.8125	-0.5188		49.75	-0.42725
49.8438	-0.5188		49.8125	-0.64087		49.875	-0.42725
49.9062	-0.54932		49.875	-0.54932		49.875	-0.48828
49.9688	-0.54932		49.9375	-0.5188		50	-0.48828
50	-0.54932		50	-0.42725		50	-0.39673
50.0625	-0.5188		50.0625	-0.48828		50	-0.39673
50.0938	-0.42725		50.0625	-0.5188		50.125	-0.45776
50.1562	-0.57983		50.125	-0.57983		50.125	-0.42725
50.2188	-0.67139		50.1875	-0.5188		50.25	-0.36621
50.25	-0.64087		50.25	-0.57983		50.25	-0.36621
50.3125	-0.67139		50.3125	-0.42725		50.25	-0.33569
50.3438	-0.42725		50.3125	-0.48828		50.375	-0.48828
50.4062	-0.5188		50.375	-0.5188		50.375	-0.48828
50.4688	-0.61035		50.4375	-0.5188		50.5	-0.24414
50.5	-0.67139		50.5	-0.61035		50.5	-0.30518
50.5625	-0.64087		50.5625	-0.5188		50.5	-0.27466
50.5938	-0.57983		50.5625	-0.5188		50.625	-0.45776
50.6562	-0.5188		50.625	-0.45776		50.625	-0.39673
50.7188	-0.64087		50.6875	-0.5188		50.75	-0.30518
50.75	-0.67139		50.75	-0.61035		50.75	-0.36621
50.8125	-0.7019		50.8125	-0.67139		50.75	-0.24414
50.8438	-0.64087		50.8125	-0.54932		50.875	-0.24414
50.9062	-0.64087		50.875	-0.5188		50.875	-0.27466
50.9688	-0.67139		50.9375	-0.45776		51	-0.30518
51	-0.5188		51	-0.57983		51	-0.39673
51.0625	-0.61035		51.0625	-0.73242		51	-0.36621
51.0938	-0.64087		51.0625	-0.61035		51.125	-0.24414
51.1562	-0.67139		51.125	-0.5188		51.125	-0.21362
51.2188	-0.64087		51.1875	-0.48828		51.25	-0.27466
51.25	-0.64087		51.25	-0.67139		51.25	-0.39673
51.3125	-0.67139		51.3125	-0.61035		51.25	-0.27466
51.3438	-0.73242		51.3125	-0.57983		51.375	-0.15259
51.4062	-0.76294		51.375	-0.5188		51.375	-0.12207
51.4688	-0.67139		51.4375	-0.57983		51.5	-0.18311
51.5	-0.67139		51.5	-0.64087		51.5	-0.36621
51.5625	-0.79346		51.5625	-0.64087		51.5	-0.18311
51.5938	-0.76294		51.5625	-0.48828		51.625	-0.24414
51.6562	-0.7019		51.625	-0.61035		51.625	-0.12207
51.7188	-0.73242		51.6875	-0.64087		51.75	-0.27466
51.75	-0.67139		51.75	-0.61035		51.75	-0.36621
51.8125	-0.73242		51.8125	-0.57983		51.75	-0.30518
51.8438	-0.67139		51.8125	-0.57983		51.875	-0.27466
51.9062	-0.67139		51.875	-0.76294		51.875	-0.21362
51.9688	-0.79346		51.9375	-0.79346		52	-0.18311
52	-0.67139		52	-0.73242		52	-0.15259
52.0625	-0.64087		52.0625	-0.54932		52	-0.30518
52.0938	-0.7019		52.0625	-0.61035		52.125	-0.27466
52.1562	-0.76294		52.125	-0.7019		52.125	-0.36621
52.2188	-0.79346		52.1875	-0.7019		52.25	-0.21362
52.25	-0.67139		52.25	-0.54932		52.25	-0.12207
52.3125	-0.61035		52.3125	-0.64087		52.25	-0.18311
52.3438	-0.5188		52.3125	-0.73242		52.375	-0.27466
52.4062	-0.79346		52.375	-0.85449		52.375	-0.42725
52.4688	-0.73242		52.4375	-0.73242		52.5	-0.30518
52.5	-0.7019		52.5	-0.61035		52.5	-0.21362
52.5625	-0.61035		52.5625	-0.67139		52.5	-0.18311
52.5938	-0.54932		52.5625	-0.76294		52.625	-0.36621
52.6562	-0.67139		52.625	-0.79346		52.625	-0.39673
52.7188	-0.7019		52.6875	-0.57983		52.75	-0.33569
52.75	-0.67139		52.75	-0.57983		52.75	-0.33569
52.8125	-0.64087		52.8125	-0.67139		52.75	-0.27466
52.8438	-0.57983		52.8125	-0.76294		52.875	-0.36621
52.9062	-0.54932		52.875	-0.76294		52.875	-0.33569
52.9688	-0.64087		52.9375	-0.79346		53	-0.42725
53	-0.67139		53	-0.73242		53	-0.48828
53.0625	-0.67139		53.0625	-0.85449		53	-0.45776
53.0938	-0.64087		53.0625	-0.64087		53.125	-0.42725
53.1562	-0.48828		53.125	-0.54932		53.125	-0.42725
53.2188	-0.42725		53.1875	-0.7019		53.25	-0.48828
53.25	-0.45776		53.25	-0.91553		53.25	-0.5188
53.3125	-0.54932		53.3125	-0.88501		53.25	-0.57983
53.3438	-0.5188		53.3125	-0.76294		53.375	-0.42725
53.4062	-0.5188		53.375	-0.54932		53.375	-0.39673
53.4688	-0.30518		53.4375	-0.73242		53.5	-0.48828
53.5	-0.30518		53.5	-0.88501		53.5	-0.61035
53.5625	-0.42725		53.5625	-0.79346		53.5	-0.61035
53.5938	-0.45776		53.5625	-0.67139		53.625	-0.54932
53.6562	-0.48828		53.625	-0.57983		53.625	-0.48828
53.7188	-0.27466		53.6875	-0.67139		53.75	-0.57983
53.75	-0.30518		53.75	-0.73242		53.75	-0.67139
53.8125	-0.33569		53.8125	-0.73242		53.75	-0.54932
53.8438	-0.42725		53.8125	-0.61035		53.875	-0.67139
53.9062	-0.39673		53.875	-0.67139		53.875	-0.64087
53.9688	-0.36621		53.9375	-0.64087		54	-0.7019
54	-0.24414		54	-0.54932		54	-0.73242
54.0625	-0.30518		54.0625	-0.48828		54	-0.64087
54.0938	-0.27466		54.0625	-0.64087		54.125	-0.7019
54.1562	-0.24414		54.125	-0.73242		54.125	-0.73242
54.2188	-0.24414		54.1875	-0.67139		54.25	-0.73242
54.25	-0.24414		54.25	-0.5188		54.25	-0.7019
54.3125	-0.24414		54.3125	-0.45776		54.25	-0.7019
54.3438	-0.12207		54.3125	-0.57983		54.375	-0.76294
54.4062	0		54.375	-0.7019		54.375	-0.76294
54.4688	0.06104		54.4375	-0.67139		54.5	-0.7019
54.5	0.33569		54.5	-0.42725		54.5	-0.67139
54.5625	0.67139		54.5625	-0.42725		54.5	-0.73242
54.5938	1.06812		54.5625	-0.57983		54.625	-0.79346
54.6562	1.2207		54.625	-0.54932		54.625	-0.79346
54.7188	1.34277		54.6875	-0.48828		54.75	-0.73242
54.75	1.5564		54.75	-0.42725		54.75	-0.67139
54.8125	1.7395		54.8125	-0.42725		54.75	-0.67139
54.8438	2.01416		54.8125	-0.5188		54.875	-0.76294
54.9062	2.13623		54.875	-0.45776		54.875	-0.7019
54.9688	2.13623		54.9375	-0.30518		55	-0.61035
55	2.34985		55	-0.33569		55	-0.67139
55.0625	2.65503		55.0625	-0.45776		55	-0.67139
55.0938	2.74658		55.0625	-0.39673		55.125	-0.73242
55.1562	2.74658		55.125	-0.33569		55.125	-0.7019
55.2188	2.47192		55.1875	-0.27466		55.25	-0.64087
55.25	2.50244		55.25	-0.36621		55.25	-0.73242
55.3125	2.28882		55.3125	-0.45776		55.25	-0.7019
55.3438	2.0752		55.3125	-0.39673		55.375	-0.64087
55.4062	1.86157		55.375	-0.24414		55.375	-0.73242
55.4688	1.49536		55.4375	-0.33569		55.5	-0.67139
55.5	1.31226		55.5	-0.36621		55.5	-0.7019
55.5625	0.91553		55.5625	-0.39673		55.5	-0.67139
55.5938	0.61035		55.5625	-0.18311		55.625	-0.54932
55.6562	0.36621		55.625	-0.21362		55.625	-0.64087
55.7188	0.18311		55.6875	-0.27466		55.75	-0.67139
55.75	-0.06104		55.75	-0.39673		55.75	-0.64087
55.8125	-0.33569		55.8125	-0.33569		55.75	-0.67139
55.8438	-0.73242		55.8125	-0.18311		55.875	-0.54932
55.9062	-0.85449		55.875	-0.27466		55.875	-0.61035
55.9688	-0.97656		55.9375	-0.36621		56	-0.57983
56	-1.06812		56	-0.42725		56	-0.7019
56.0625	-1.34277		56.0625	-0.33569		56	-0.7019
56.0938	-1.64795		56.0625	-0.18311		56.125	-0.57983
56.1562	-1.70898		56.125	-0.36621		56.125	-0.5188
56.2188	-1.83105		56.1875	-0.36621		56.25	-0.48828
56.25	-1.89209		56.25	-0.33569		56.25	-0.64087
56.3125	-1.89209		56.3125	-0.30518		56.25	-0.64087
56.3438	-2.13623		56.3125	-0.36621		56.375	-0.57983
56.4062	-2.19727		56.375	-0.36621		56.375	-0.61035
56.4688	-2.2583		56.4375	-0.27466		56.5	-0.57983
56.5	-2.38037		56.5	-0.18311		56.5	-0.48828
56.5625	-2.41089		56.5625	-0.30518		56.5	-0.64087
56.5938	-2.34985		56.5625	-0.42725		56.625	-0.64087
56.6562	-2.50244		56.625	-0.42725		56.625	-0.7019
56.7188	-2.56348		56.6875	-0.39673		56.75	-0.54932
56.75	-2.80762		56.75	-0.15259		56.75	-0.36621
56.8125	-2.65503		56.8125	-0.24414		56.75	-0.61035
56.8438	-2.65503		56.8125	-0.45776		56.875	-0.64087
56.9062	-2.68555		56.875	-0.33569		56.875	-0.64087
56.9688	-2.74658		56.9375	-0.36621		57	-0.57983
57	-2.89917		57	-0.27466		57	-0.36621
57.0625	-2.74658		57.0625	-0.30518		57	-0.48828
57.0938	-2.65503		57.0625	-0.36621		57.125	-0.57983
57.1562	-2.68555		57.125	-0.39673		57.125	-0.5188
57.2188	-2.71606		57.1875	-0.48828		57.25	-0.61035
57.25	-2.65503		57.25	-0.42725		57.25	-0.5188
57.3125	-2.56348		57.3125	-0.27466		57.25	-0.42725
57.3438	-2.44141		57.3125	-0.27466		57.375	-0.5188
57.4062	-2.56348		57.375	-0.30518		57.375	-0.42725
57.4688	-2.47192		57.4375	-0.5188		57.5	-0.54932
57.5	-2.34985		57.5	-0.45776		57.5	-0.48828
57.5625	-2.19727		57.5625	-0.42725		57.5	-0.48828
57.5938	-2.19727		57.5625	-0.39673		57.625	-0.33569
57.6562	-2.16675		57.625	-0.27466		57.625	-0.42725
57.7188	-2.04468		57.6875	-0.42725		57.75	-0.54932
57.75	-1.98364		57.75	-0.57983		57.75	-0.54932
57.8125	-1.89209		57.8125	-0.42725		57.75	-0.5188
57.8438	-1.77002		57.8125	-0.48828		57.875	-0.42725
57.9062	-1.80054		57.875	-0.30518		57.875	-0.39673
57.9688	-1.49536		57.9375	-0.45776		58	-0.54932
58	-1.49536		58	-0.5188		58	-0.61035
58.0625	-1.5564		58.0625	-0.45776		58	-0.48828
58.0938	-1.52588		58.0625	-0.42725		58.125	-0.5188
58.1562	-1.43433		58.125	-0.42725		58.125	-0.39673
58.2188	-1.28174		58.1875	-0.39673		58.25	-0.54932
58.25	-1.19019		58.25	-0.39673		58.25	-0.48828
58.3125	-1.34277		58.3125	-0.33569		58.25	-0.48828
58.3438	-1.28174		58.3125	-0.48828		58.375	-0.61035
58.4062	-1.19019		58.375	-0.57983		58.375	-0.45776
58.4688	-1.12915		58.4375	-0.45776		58.5	-0.57983
58.5	-1.00708		58.5	-0.42725		58.5	-0.45776
58.5625	-1.0376		58.5625	-0.36621		58.5	-0.54932
58.5938	-1.00708		58.5625	-0.48828		58.625	-0.57983
58.6562	-1.0376		58.625	-0.57983		58.625	-0.61035
58.7188	-1.00708		58.6875	-0.45776		58.75	-0.48828
58.75	-1.00708		58.75	-0.42725		58.75	-0.48828
58.8125	-0.91553		58.8125	-0.36621		58.75	-0.39673
58.8438	-0.76294		58.8125	-0.5188		58.875	-0.61035
58.9062	-0.88501		58.875	-0.54932		58.875	-0.57983
58.9688	-0.91553		58.9375	-0.5188		59	-0.45776
59	-0.88501		59	-0.42725		59	-0.48828
59.0625	-0.82397		59.0625	-0.45776		59	-0.48828
59.0938	-0.73242		59.0625	-0.5188		59.125	-0.64087
59.1562	-0.76294		59.125	-0.48828		59.125	-0.5188
59.2188	-0.82397		59.1875	-0.42725		59.25	-0.48828
59.25	-0.7019		59.25	-0.45776		59.25	-0.39673
59.3125	-0.76294		59.3125	-0.5188		59.25	-0.5188
59.3438	-0.7019		59.3125	-0.48828		59.375	-0.67139
59.4062	-0.61035		59.375	-0.5188		59.375	-0.48828
59.4688	-0.73242		59.4375	-0.39673		59.5	-0.48828
59.5	-0.64087		59.5	-0.48828		59.5	-0.57983
59.5625	-0.76294		59.5625	-0.54932		59.5	-0.61035
59.5938	-0.7019		59.5625	-0.42725		59.625	-0.64087
59.6562	-0.57983		59.625	-0.5188		59.625	-0.48828
59.7188	-0.61035		59.6875	-0.48828		59.75	-0.5188
59.75	-0.57983		59.75	-0.54932		59.75	-0.57983
59.8125	-0.67139		59.8125	-0.48828		59.75	-0.5188
59.8438	-0.64087		59.8125	-0.39673		59.875	-0.5188
59.9062	-0.61035		59.875	-0.42725		59.875	-0.5188
59.9688	-0.64087		59.9375	-0.61035		60	-0.5188
60	-0.5188		60	-0.61035		60	-0.64087
60.0625	-0.54932		60.0625	-0.48828		60	-0.5188
60.0938	-0.57983		60.0625	-0.39673		60.125	-0.54932
60.1562	-0.5188		60.125	-0.48828		60.125	-0.61035
60.2188	-0.48828		60.1875	-0.5188		60.25	-0.64087
60.25	-0.45776		60.25	-0.5188		60.25	-0.64087
60.3125	-0.5188		60.3125	-0.54932		60.25	-0.5188
60.3438	-0.5188		60.3125	-0.39673		60.375	-0.54932
60.4062	-0.5188		60.375	-0.45776		60.375	-0.5188
60.4688	-0.54932		60.4375	-0.42725		60.5	-0.7019
60.5	-0.48828		60.5	-0.48828		60.5	-0.67139
60.5625	-0.54932		60.5625	-0.48828		60.5	-0.64087
60.5938	-0.54932		60.5625	-0.42725		60.625	-0.57983
60.6562	-0.36621		60.625	-0.54932		60.625	-0.64087
60.7188	-0.5188		60.6875	-0.36621		60.75	-0.64087
60.75	-0.42725		60.75	-0.42725		60.75	-0.73242
60.8125	-0.5188		60.8125	-0.48828		60.75	-0.67139
60.8438	-0.45776		60.8125	-0.48828		60.875	-0.73242
60.9062	-0.42725		60.875	-0.54932		60.875	-0.7019
60.9688	-0.42725		60.9375	-0.36621		61	-0.61035
61	-0.39673		61	-0.24414		61	-0.67139
61.0625	-0.33569		61.0625	-0.42725		61	-0.67139
61.0938	-0.39673		61.0625	-0.45776		61.125	-0.76294
61.1562	-0.42725		61.125	-0.5188		61.125	-0.76294
61.2188	-0.45776		61.1875	-0.45776		61.25	-0.57983
61.25	-0.36621		61.25	-0.30518		61.25	-0.61035
61.3125	-0.24414		61.3125	-0.42725		61.25	-0.76294
61.3438	-0.27466		61.3125	-0.45776		61.375	-0.79346
61.4062	-0.30518		61.375	-0.5188		61.375	-0.76294
61.4688	-0.39673		61.4375	-0.45776		61.5	-0.73242
61.5	-0.36621		61.5	-0.45776		61.5	-0.7019
61.5625	-0.33569		61.5625	-0.45776		61.5	-0.79346
61.5938	-0.21362		61.5625	-0.27466		61.625	-0.88501
61.6562	-0.21362		61.625	-0.36621		61.625	-0.82397
61.7188	-0.33569		61.6875	-0.36621		61.75	-0.73242
61.75	-0.30518		61.75	-0.45776		61.75	-0.67139
61.8125	-0.39673		61.8125	-0.45776		61.75	-0.67139
61.8438	-0.39673		61.8125	-0.27466		61.875	-0.64087
61.9062	-0.27466		61.875	-0.21362		61.875	-0.79346
61.9688	-0.18311		61.9375	-0.36621		62	-0.82397
62	-0.30518		62	-0.45776		62	-0.91553
62.0625	-0.30518		62.0625	-0.45776		62	-0.76294
62.0938	-0.39673		62.0625	-0.33569		62.125	-0.7019
62.1562	-0.36621		62.125	-0.27466		62.125	-0.73242
62.2188	-0.15259		62.1875	-0.39673		62.25	-0.82397
62.25	-0.21362		62.25	-0.39673		62.25	-0.76294
62.3125	-0.27466		62.3125	-0.36621		62.25	-0.67139
62.3438	-0.39673		62.3125	-0.27466		62.375	-0.57983
62.4062	-0.39673		62.375	-0.24414		62.375	-0.64087
62.4688	-0.21362		62.4375	-0.27466		62.5	-0.7019
62.5	-0.30518		62.5	-0.30518		62.5	-0.73242
62.5625	-0.33569		62.5625	-0.36621		62.5	-0.73242
62.5938	-0.48828		62.5625	-0.36621		62.625	-0.67139
62.6562	-0.33569		62.625	-0.39673		62.625	-0.61035
62.7188	-0.36621		62.6875	-0.33569		62.75	-0.73242
62.75	-0.33569		62.75	-0.30518		62.75	-0.64087
62.8125	-0.33569		62.8125	-0.18311		62.75	-0.67139
62.8438	-0.33569		62.8125	-0.27466		62.875	-0.73242
62.9062	-0.33569		62.875	-0.36621		62.875	-0.61035
62.9688	-0.39673		62.9375	-0.18311		63	-0.57983
63	-0.42725		63	-0.21362		63	-0.54932
63.0625	-0.45776		63.0625	-0.21362		63	-0.61035
63.0938	-0.39673		63.0625	-0.27466		63.125	-0.61035
63.1562	-0.42725		63.125	-0.21362		63.125	-0.61035
63.2188	-0.48828		63.1875	-0.33569		63.25	-0.45776
63.25	-0.54932		63.25	-0.36621		63.25	-0.54932
63.3125	-0.45776		63.3125	-0.30518		63.25	-0.45776
63.3438	-0.42725		63.3125	-0.24414		63.375	-0.5188
63.4062	-0.48828		63.375	-0.18311		63.375	-0.42725
63.4688	-0.57983		63.4375	-0.24414		63.5	-0.45776
63.5	-0.54932		63.5	-0.24414		63.5	-0.42725
63.5625	-0.5188		63.5625	-0.21362		63.5	-0.45776
63.5938	-0.5188		63.5625	-0.30518		63.625	-0.45776
63.6562	-0.57983		63.625	-0.39673		63.625	-0.33569
63.7188	-0.67139		63.6875	-0.30518		63.75	-0.42725
63.75	-0.54932		63.75	-0.36621		63.75	-0.45776
63.8125	-0.61035		63.8125	-0.27466		63.75	-0.36621
63.8438	-0.57983		63.8125	-0.24414		63.875	-0.39673
63.9062	-0.64087		63.875	-0.30518		63.875	-0.33569
63.9688	-0.67139		63.9375	-0.42725		64	-0.36621
64	-0.7019		64	-0.42725		64	-0.30518
64.0625	-0.73242		64.0625	-0.30518		64	-0.24414
64.0938	-0.79346		64.0625	-0.30518		64.125	-0.27466
64.1562	-0.7019		64.125	-0.30518		64.125	-0.36621
64.2188	-0.61035		64.1875	-0.54932		64.25	-0.30518
64.25	-0.7019		64.25	-0.48828		64.25	-0.39673
64.3125	-0.76294		64.3125	-0.36621		64.25	-0.24414
64.3438	-0.79346		64.3125	-0.36621		64.375	-0.30518
64.4062	-0.67139		64.375	-0.39673		64.375	-0.36621
64.4688	-0.54932		64.4375	-0.64087		64.5	-0.24414
64.5	-0.64087		64.5	-0.48828		64.5	-0.24414
64.5625	-0.73242		64.5625	-0.48828		64.5	-0.21362
64.5938	-0.85449		64.5625	-0.45776		64.625	-0.15259
64.6562	-0.7019		64.625	-0.48828		64.625	-0.36621
64.7188	-0.67139		64.6875	-0.5188		64.75	-0.33569
64.75	-0.64087		64.75	-0.5188		64.75	-0.30518
64.8125	-0.76294		64.8125	-0.64087		64.75	-0.21362
64.8438	-0.85449		64.8125	-0.61035		64.875	-0.21362
64.9062	-0.7019		64.875	-0.64087		64.875	-0.33569
64.9688	-0.7019		64.9375	-0.45776		65	-0.36621
65	-0.64087		65	-0.57983		65	-0.30518
65.0625	-0.64087		65.0625	-0.61035		65	-0.30518
65.0938	-0.67139		65.0625	-0.61035		65.125	-0.24414
65.1562	-0.73242		65.125	-0.67139		65.125	-0.33569
65.2188	-0.79346		65.1875	-0.54932		65.25	-0.24414
65.25	-0.79346		65.25	-0.61035		65.25	-0.30518
65.3125	-0.67139		65.3125	-0.67139		65.25	-0.33569
65.3438	-0.64087		65.3125	-0.73242		65.375	-0.30518
65.4062	-0.67139		65.375	-0.7019		65.375	-0.30518
65.4688	-0.73242		65.4375	-0.76294		65.5	-0.24414
65.5	-0.88501		65.5	-0.64087		65.5	-0.33569
65.5625	-0.57983		65.5625	-0.67139		65.5	-0.5188
65.5938	-0.67139		65.5625	-0.64087		65.625	-0.39673
65.6562	-0.67139		65.625	-0.7019		65.625	-0.36621
65.7188	-0.76294		65.6875	-0.76294		65.75	-0.21362
65.75	-0.79346		65.75	-0.73242		65.75	-0.21362
65.8125	-0.64087		65.8125	-0.7019		65.75	-0.42725
65.8438	-0.67139		65.8125	-0.7019		65.875	-0.42725
65.9062	-0.7019		65.875	-0.7019		65.875	-0.33569
65.9688	-0.7019		65.9375	-0.79346		66	-0.33569
66	-0.61035		66	-0.76294		66	-0.27466
66.0625	-0.61035		66.0625	-0.67139		66	-0.36621
66.0938	-0.64087		66.0625	-0.7019		66.125	-0.33569
66.1562	-0.7019		66.125	-0.67139		66.125	-0.33569
66.2188	-0.67139		66.1875	-0.79346		66.25	-0.48828
66.25	-0.64087		66.25	-0.67139		66.25	-0.30518
66.3125	-0.61035		66.3125	-0.67139		66.25	-0.33569
66.3438	-0.61035		66.3125	-0.67139		66.375	-0.39673
66.4062	-0.67139		66.375	-0.64087		66.375	-0.39673
66.4688	-0.45776		66.4375	-0.73242		66.5	-0.5188
66.5	-0.64087		66.5	-0.67139		66.5	-0.48828
66.5625	-0.64087		66.5625	-0.7019		66.5	-0.30518
66.5938	-0.61035		66.5625	-0.73242		66.625	-0.36621
66.6562	-0.64087		66.625	-0.67139		66.625	-0.36621
66.7188	-0.48828		66.6875	-0.76294		66.75	-0.61035
66.75	-0.57983		66.75	-0.64087		66.75	-0.45776
66.8125	-0.67139		66.8125	-0.64087		66.75	-0.36621
66.8438	-0.64087		66.8125	-0.7019		66.875	-0.33569
66.9062	-0.5188		66.875	-0.61035		66.875	-0.36621
66.9688	-0.48828		66.9375	-0.64087		67	-0.5188
67	-0.48828		67	-0.7019		67	-0.48828
67.0625	-0.64087		67.0625	-0.64087		67	-0.42725
67.0938	-0.57983		67.0625	-0.61035		67.125	-0.42725
67.1562	-0.61035		67.125	-0.61035		67.125	-0.36621
67.2188	-0.54932		67.1875	-0.5188		67.25	-0.45776
67.25	-0.45776		67.25	-0.64087		67.25	-0.45776
67.3125	-0.61035		67.3125	-0.61035		67.25	-0.48828
67.3438	-0.5188		67.3125	-0.7019		67.375	-0.57983
67.4062	-0.64087		67.375	-0.57983		67.375	-0.48828
67.4688	-0.64087		67.4375	-0.54932		67.5	-0.36621
67.5	-0.5188		67.5	-0.54932		67.5	-0.48828
67.5625	-0.48828		67.5625	-0.64087		67.5	-0.42725
67.5938	-0.42725		67.5625	-0.76294		67.625	-0.61035
67.6562	-0.57983		67.625	-0.61035		67.625	-0.45776
67.7188	-0.64087		67.6875	-0.45776		67.75	-0.33569
67.75	-0.64087		67.75	-0.45776		67.75	-0.39673
67.8125	-0.48828		67.8125	-0.54932		67.75	-0.48828
67.8438	-0.45776		67.8125	-0.7019		67.875	-0.61035
67.9062	-0.5188		67.875	-0.61035		67.875	-0.45776
67.9688	-0.67139		67.9375	-0.45776		68	-0.45776
68	-0.54932		68	-0.48828		68	-0.45776
68.0625	-0.61035		68.0625	-0.54932		68	-0.5188
68.0938	-0.45776		68.0625	-0.57983		68.125	-0.48828
68.1562	-0.48828		68.125	-0.61035		68.125	-0.48828
68.2188	-0.57983		68.1875	-0.5188		68.25	-0.42725
68.25	-0.45776		68.25	-0.67139		68.25	-0.5188
68.3125	-0.64087		68.3125	-0.54932		68.25	-0.45776
68.3438	-0.57983		68.3125	-0.5188		68.375	-0.39673
68.4062	-0.48828		68.375	-0.54932		68.375	-0.5188
68.4688	-0.48828		68.4375	-0.54932		68.5	-0.5188
68.5	-0.57983		68.5	-0.7019		68.5	-0.54932
68.5625	-0.64087		68.5625	-0.48828		68.5	-0.48828
68.5938	-0.64087		68.5625	-0.36621		68.625	-0.39673
68.6562	-0.48828		68.625	-0.48828		68.625	-0.48828
68.7188	-0.5188		68.6875	-0.61035		68.75	-0.48828
68.75	-0.54932		68.75	-0.64087		68.75	-0.54932
68.8125	-0.5188		68.8125	-0.57983		68.75	-0.39673
68.8438	-0.54932		68.8125	-0.36621		68.875	-0.42725
68.9062	-0.48828		68.875	-0.45776		68.875	-0.5188
68.9688	-0.57983		68.9375	-0.61035		69	-0.42725
69	-0.5188		69	-0.57983		69	-0.45776
69.0625	-0.5188		69.0625	-0.48828		69	-0.36621
69.0938	-0.5188		69.0625	-0.48828		69.125	-0.36621
69.1562	-0.48828		69.125	-0.54932		69.125	-0.5188
69.2188	-0.61035		69.1875	-0.45776		69.25	-0.45776
69.25	-0.48828		69.25	-0.48828		69.25	-0.42725
69.3125	-0.48828		69.3125	-0.45776		69.25	-0.45776
69.3438	-0.5188		69.3125	-0.48828		69.375	-0.33569
69.4062	-0.61035		69.375	-0.64087		69.375	-0.48828
69.4688	-0.57983		69.4375	-0.42725		69.5	-0.42725
69.5	-0.54932		69.5	-0.36621		69.5	-0.42725
69.5625	-0.5188		69.5625	-0.5188		69.5	-0.42725
69.5938	-0.61035		69.5625	-0.57983		69.625	-0.42725
69.6562	-0.54932		69.625	-0.64087		69.625	-0.5188
69.7188	-0.61035		69.6875	-0.45776		69.75	-0.39673
69.75	-0.57983		69.75	-0.39673		69.75	-0.45776
69.8125	-0.48828		69.8125	-0.48828		69.75	-0.48828
69.8438	-0.54932		69.8125	-0.64087		69.875	-0.42725
69.9062	-0.61035		69.875	-0.57983		69.875	-0.36621
69.9688	-0.67139		69.9375	-0.5188		70	-0.27466
70	-0.57983		70	-0.45776		70	-0.36621
70.0625	-0.45776		70.0625	-0.57983		70	-0.5188
70.0938	-0.48828		70.0625	-0.5188		70.125	-0.36621
70.1562	-0.61035		70.125	-0.48828		70.125	-0.33569
70.2188	-0.76294		70.1875	-0.45776		70.25	-0.21362
70.25	-0.67139		70.25	-0.48828		70.25	-0.33569
70.3125	-0.61035		70.3125	-0.61035		70.25	-0.5188
70.3438	-0.54932		70.3125	-0.54932		70.375	-0.39673
70.4062	-0.54932		70.375	-0.45776		70.375	-0.42725
70.4688	-0.64087		70.4375	-0.5188		70.5	-0.27466
70.5	-0.64087		70.5	-0.64087		70.5	-0.30518
70.5625	-0.61035		70.5625	-0.57983		70.5	-0.39673
70.5938	-0.64087		70.5625	-0.45776		70.625	-0.33569
70.6562	-0.57983		70.625	-0.45776		70.625	-0.39673
70.7188	-0.5188		70.6875	-0.57983		70.75	-0.39673
70.75	-0.64087		70.75	-0.54932		70.75	-0.30518
70.8125	-0.67139		70.8125	-0.57983		70.75	-0.21362
70.8438	-0.73242		70.8125	-0.39673		70.875	-0.27466
70.9062	-0.67139		70.875	-0.54932		70.875	-0.39673
70.9688	-0.5188		70.9375	-0.7019		71	-0.42725
71	-0.57983		71	-0.57983		71	-0.33569
71.0625	-0.7019		71.0625	-0.5188		71	-0.27466
71.0938	-0.82397		71.0625	-0.42725		71.125	-0.24414
71.1562	-0.67139		71.125	-0.57983		71.125	-0.36621
71.2188	-0.61035		71.1875	-0.67139		71.25	-0.39673
71.25	-0.64087		71.25	-0.61035		71.25	-0.30518
71.3125	-0.73242		71.3125	-0.45776		71.25	-0.24414
71.3438	-0.73242		71.3125	-0.57983		71.375	-0.09155
71.4062	-0.76294		71.375	-0.57983		71.375	-0.24414
71.4688	-0.73242		71.4375	-0.64087		71.5	-0.36621
71.5	-0.79346		71.5	-0.48828		71.5	-0.27466
71.5625	-0.82397		71.5625	-0.57983		71.5	-0.33569
71.5938	-0.82397		71.5625	-0.57983		71.625	-0.21362
71.6562	-0.85449		71.625	-0.64087		71.625	-0.27466
71.7188	-0.88501		71.6875	-0.64087		71.75	-0.24414
71.75	-0.82397		71.75	-0.48828		71.75	-0.24414
71.8125	-0.7019		71.8125	-0.64087		71.75	-0.30518
71.8438	-0.67139		71.8125	-0.73242		71.875	-0.27466
71.9062	-0.67139		71.875	-0.61035		71.875	-0.18311
71.9688	-0.79346		71.9375	-0.48828		72	-0.18311
72	-0.88501		72	-0.5188		72	-0.24414
72.0625	-0.73242		72.0625	-0.73242		72	-0.36621
72.0938	-0.73242		72.0625	-0.82397		72.125	-0.30518
72.1562	-0.79346		72.125	-0.7019		72.125	-0.15259
72.2188	-0.76294		72.1875	-0.64087		72.25	-0.12207
72.25	-0.76294		72.25	-0.57983		72.25	-0.21362
72.3125	-0.64087		72.3125	-0.73242		72.25	-0.30518
72.3438	-0.64087		72.3125	-0.79346		72.375	-0.33569
72.4062	-0.67139		72.375	-0.64087		72.375	-0.36621
72.4688	-0.76294		72.4375	-0.76294		72.5	-0.30518
72.5	-0.61035		72.5	-0.7019		72.5	-0.24414
72.5625	-0.7019		72.5625	-0.67139		72.5	-0.27466
72.5938	-0.67139		72.5625	-0.64087		72.625	-0.36621
72.6562	-0.76294		72.625	-0.64087		72.625	-0.36621
72.7188	-0.76294		72.6875	-0.82397		72.75	-0.33569
72.75	-0.73242		72.75	-0.94604		72.75	-0.30518
72.8125	-0.67139		72.8125	-0.7019		72.75	-0.36621
72.8438	-0.73242		72.8125	-0.57983		72.875	-0.42725
72.9062	-0.64087		72.875	-0.64087		72.875	-0.42725
72.9688	-0.61035		72.9375	-0.82397		73	-0.48828
73	-0.67139		73	-0.85449		73	-0.45776
73.0625	-0.7019		73.0625	-0.82397		73	-0.33569
73.0938	-0.67139		73.0625	-0.67139		73.125	-0.39673
73.1562	-0.5188		73.125	-0.7019		73.125	-0.42725
73.2188	-0.48828		73.1875	-0.88501		73.25	-0.54932
73.25	-0.48828		73.25	-0.76294		73.25	-0.5188
73.3125	-0.7019		73.3125	-0.67139		73.25	-0.42725
73.3438	-0.67139		73.3125	-0.67139		73.375	-0.48828
73.4062	-0.57983		73.375	-0.7019		73.375	-0.48828
73.4688	-0.36621		73.4375	-0.7019		73.5	-0.48828
73.5	-0.39673		73.5	-0.79346		73.5	-0.39673
73.5625	-0.54932		73.5625	-0.67139		73.5	-0.48828
73.5938	-0.57983		73.5625	-0.82397		73.625	-0.5188
73.6562	-0.45776		73.625	-0.7019		73.625	-0.67139
73.7188	-0.48828		73.6875	-0.64087		73.75	-0.61035
73.75	-0.33569		73.75	-0.73242		73.75	-0.57983
73.8125	-0.36621		73.8125	-0.73242		73.75	-0.61035
73.8438	-0.36621		73.8125	-0.64087		73.875	-0.64087
73.9062	-0.42725		73.875	-0.64087		73.875	-0.73242
73.9688	-0.39673		73.9375	-0.67139		74	-0.67139
74	-0.39673		74	-0.67139		74	-0.61035
74.0625	-0.15259		74.0625	-0.64087		74	-0.64087
74.0938	-0.27466		74.0625	-0.61035		74.125	-0.67139
74.1562	-0.27466		74.125	-0.67139		74.125	-0.67139
74.2188	-0.42725		74.1875	-0.64087		74.25	-0.76294
74.25	-0.42725		74.25	-0.57983		74.25	-0.7019
74.3125	-0.30518		74.3125	-0.61035		74.25	-0.73242
74.3438	-0.24414		74.3125	-0.54932		74.375	-0.67139
74.4062	-0.33569		74.375	-0.54932		74.375	-0.64087
74.4688	-0.39673		74.4375	-0.61035		74.5	-0.7019
74.5	-0.39673		74.5	-0.54932		74.5	-0.76294
74.5625	-0.30518		74.5625	-0.57983		74.5	-0.85449
74.5938	-0.21362		74.5625	-0.5188		74.625	-0.67139
74.6562	-0.27466		74.625	-0.45776		74.625	-0.73242
74.7188	-0.30518		74.6875	-0.5188		74.75	-0.61035
74.75	-0.33569		74.75	-0.54932		74.75	-0.7019
74.8125	-0.39673		74.8125	-0.39673		74.75	-0.79346
74.8438	-0.27466		74.8125	-0.39673		74.875	-0.73242
74.9062	-0.36621		74.875	-0.36621		74.875	-0.7019
74.9688	-0.18311		74.9375	-0.45776		75	-0.67139
75	-0.27466		75	-0.48828		75	-0.73242
75.0625	-0.27466		75.0625	-0.36621		75	-0.73242
75.0938	-0.39673		75.0625	-0.30518		75.125	-0.82397
75.1562	-0.36621		75.125	-0.39673		75.125	-0.76294
75.2188	-0.27466		75.1875	-0.48828		75.25	-0.79346
75.25	-0.33569		75.25	-0.33569		75.25	-0.61035
75.3125	-0.30518		75.3125	-0.36621		75.25	-0.61035
75.3438	-0.33569		75.3125	-0.27466		75.375	-0.7019
75.4062	-0.30518		75.375	-0.33569		75.375	-0.73242
75.4688	-0.15259		75.4375	-0.39673		75.5	-0.82397
75.5	-0.33569		75.5	-0.33569		75.5	-0.57983
75.5625	-0.39673		75.5625	-0.18311		75.5	-0.61035
75.5938	-0.27466		75.5625	-0.27466		75.625	-0.61035
75.6562	-0.30518		75.625	-0.30518		75.625	-0.67139
75.7188	-0.27466		75.6875	-0.33569		75.75	-0.76294
75.75	-0.21362		75.75	-0.33569		75.75	-0.61035
75.8125	-0.33569		75.8125	-0.30518		75.75	-0.54932
75.8438	-0.27466		75.8125	-0.36621		75.875	-0.54932
75.9062	-0.45776		75.875	-0.27466		75.875	-0.67139
75.9688	-0.33569		75.9375	-0.27466		76	-0.67139
76	-0.30518		76	-0.21362		76	-0.57983
76.0625	-0.27466		76.0625	-0.36621		76	-0.64087
76.0938	-0.39673		76.0625	-0.45776		76.125	-0.5188
76.1562	-0.42725		76.125	-0.21362		76.125	-0.54932
76.2188	-0.39673		76.1875	-0.24414		76.25	-0.54932
76.25	-0.24414		76.25	-0.18311		76.25	-0.61035
76.3125	-0.36621		76.3125	-0.33569		76.25	-0.61035
76.3438	-0.33569		76.3125	-0.39673		76.375	-0.67139
76.4062	-0.48828		76.375	-0.33569		76.375	-0.42725
76.4688	-0.54932		76.4375	-0.15259		76.5	-0.45776
76.5	-0.42725		76.5	-0.24414		76.5	-0.57983
76.5625	-0.39673		76.5625	-0.30518		76.5	-0.57983
76.5938	-0.36621		76.5625	-0.39673		76.625	-0.7019
76.6562	-0.36621		76.625	-0.30518		76.625	-0.48828
76.7188	-0.57983		76.6875	-0.30518		76.75	-0.42725
76.75	-0.42725		76.75	-0.30518		76.75	-0.57983
76.8125	-0.54932		76.8125	-0.21362		76.75	-0.64087
76.8438	-0.39673		76.8125	-0.30518		76.875	-0.61035
76.9062	-0.36621		76.875	-0.27466		76.875	-0.54932
76.9688	-0.5188		76.9375	-0.36621		77	-0.42725
77	-0.48828		77	-0.45776		77	-0.5188
77.0625	-0.48828		77.0625	-0.24414		77	-0.5188
77.0938	-0.54932		77.0625	-0.30518		77.125	-0.57983
77.1562	-0.39673		77.125	-0.33569		77.125	-0.5188
77.2188	-0.42725		77.1875	-0.42725		77.25	-0.54932
77.25	-0.39673		77.25	-0.48828		77.25	-0.54932
77.3125	-0.57983		77.3125	-0.36621		77.25	-0.39673
77.3438	-0.61035		77.3125	-0.24414		77.375	-0.5188
77.4062	-0.45776		77.375	-0.39673		77.375	-0.61035
77.4688	-0.42725		77.4375	-0.45776		77.5	-0.61035
77.5	-0.39673		77.5	-0.42725		77.5	-0.57983
77.5625	-0.45776		77.5625	-0.42725		77.5	-0.45776
77.5938	-0.54932		77.5625	-0.33569		77.625	-0.48828
77.6562	-0.42725		77.625	-0.42725		77.625	-0.57983
77.7188	-0.45776		77.6875	-0.42725		77.75	-0.61035
77.75	-0.39673		77.75	-0.42725		77.75	-0.5188
77.8125	-0.42725		77.8125	-0.39673		77.75	-0.45776
77.8438	-0.45776		77.8125	-0.42725		77.875	-0.48828
77.9062	-0.48828		77.875	-0.54932		77.875	-0.57983
77.9688	-0.45776		77.9375	-0.39673		78	-0.5188
78	-0.5188		78	-0.42725		78	-0.48828
78.0625	-0.5188		78.0625	-0.42725		78	-0.45776
78.0938	-0.48828		78.0625	-0.5188		78.125	-0.42725
78.1562	-0.45776		78.125	-0.48828		78.125	-0.54932
78.2188	-0.54932		78.1875	-0.45776		78.25	-0.39673
78.25	-0.5188		78.25	-0.36621		78.25	-0.45776
78.3125	-0.42725		78.3125	-0.48828		78.25	-0.57983
78.3438	-0.54932		78.3125	-0.45776		78.375	-0.48828
78.4062	-0.45776		78.375	-0.45776		78.375	-0.5188
78.4688	-0.48828		78.4375	-0.39673		78.5	-0.42725
78.5	-0.5188		78.5	-0.45776		78.5	-0.45776
78.5625	-0.33569		78.5625	-0.61035		78.5	-0.5188
78.5938	-0.48828		78.5625	-0.48828		78.625	-0.5188
78.6562	-0.5188		78.625	-0.45776		78.625	-0.45776
78.7188	-0.54932		78.6875	-0.42725		78.75	-0.48828
78.75	-0.45776		78.75	-0.45776		78.75	-0.57983
78.8125	-0.36621		78.8125	-0.61035		78.75	-0.57983
78.8438	-0.42725		78.8125	-0.5188		78.875	-0.54932
78.9062	-0.5188		78.875	-0.39673		78.875	-0.42725
78.9688	-0.57983		78.9375	-0.48828		79	-0.45776
79	-0.48828		79	-0.36621		79	-0.54932
79.0625	-0.42725		79.0625	-0.48828		79	-0.64087
79.0938	-0.45776		79.0625	-0.48828		79.125	-0.39673
79.1562	-0.48828		79.125	-0.48828		79.125	-0.45776
79.2188	-0.48828		79.1875	-0.48828		79.25	-0.45776
79.25	-0.5188		79.25	-0.48828		79.25	-0.57983
79.3125	-0.48828		79.3125	-0.45776		79.25	-0.61035
79.3438	-0.45776		79.3125	-0.39673		79.375	-0.5188
79.4062	-0.39673		79.375	-0.48828		79.375	-0.57983
79.4688	-0.36621		79.4375	-0.5188		79.5	-0.5188
79.5	-0.48828		79.5	-0.45776		79.5	-0.54932
79.5625	-0.5188		79.5625	-0.39673		79.5	-0.54932
79.5938	-0.61035		79.5625	-0.33569		79.625	-0.57983
79.6562	-0.36621		79.625	-0.48828		79.625	-0.61035
79.7188	-0.33569		79.6875	-0.64087		79.75	-0.61035
79.75	-0.42725		79.75	-0.48828		79.75	-0.39673
79.8125	-0.54932		79.8125	-0.48828		79.75	-0.54932
79.8438	-0.5188		79.8125	-0.45776		79.875	-0.5188
79.9062	-0.48828		79.875	-0.36621		79.875	-0.57983
79.9688	-0.36621		79.9375	-0.45776		80	-0.5188
80	-0.39673		80	-0.54932		80	-0.48828
80.0625	-0.45776		80.0625	-0.54932		80	-0.64087
80.0938	-0.36621		80.0625	-0.5188		80.125	-0.57983
80.1562	-0.39673		80.125	-0.30518		80.125	-0.73242
80.2188	-0.39673		80.1875	-0.45776		80.25	-0.61035
80.25	-0.39673		80.25	-0.5188		80.25	-0.67139
80.3125	-0.39673		80.3125	-0.54932		80.25	-0.5188
80.3438	-0.39673		80.3125	-0.5188		80.375	-0.5188
80.4062	-0.42725		80.375	-0.33569		80.375	-0.61035
80.4688	-0.48828		80.4375	-0.39673		80.5	-0.7019
80.5	-0.45776		80.5	-0.45776		80.5	-0.7019
80.5625	-0.30518		80.5625	-0.54932		80.5	-0.67139
80.5938	-0.33569		80.5625	-0.64087		80.625	-0.54932
80.6562	-0.42725		80.625	-0.48828		80.625	-0.54932
80.7188	-0.45776		80.6875	-0.45776		80.75	-0.73242
80.75	-0.42725		80.75	-0.45776		80.75	-0.7019
80.8125	-0.30518		80.8125	-0.48828		80.75	-0.76294
80.8438	-0.24414		80.8125	-0.45776		80.875	-0.67139
80.9062	-0.33569		80.875	-0.42725		80.875	-0.64087
80.9688	-0.36621		80.9375	-0.45776		81	-0.67139
81	-0.30518		81	-0.42725		81	-0.73242
81.0625	-0.39673		81.0625	-0.39673		81	-0.76294
81.0938	-0.36621		81.0625	-0.45776		81.125	-0.7019
81.1562	-0.42725		81.125	-0.39673		81.125	-0.61035
81.2188	-0.36621		81.1875	-0.54932		81.25	-0.61035
81.25	-0.24414		81.25	-0.45776		81.25	-0.76294
81.3125	-0.27466		81.3125	-0.30518		81.25	-0.79346
81.3438	-0.24414		81.3125	-0.42725		81.375	-0.73242
81.4062	-0.30518		81.375	-0.39673		81.375	-0.7019
81.4688	-0.21362		81.4375	-0.57983		81.5	-0.73242
81.5	-0.24414		81.5	-0.45776		81.5	-0.73242
81.5625	-0.27466		81.5625	-0.30518		81.5	-0.85449
81.5938	-0.27466		81.5625	-0.33569		81.625	-0.85449
81.6562	-0.24414		81.625	-0.33569		81.625	-0.88501
81.7188	-0.24414		81.6875	-0.36621		81.75	-0.79346
81.75	-0.30518		81.75	-0.36621		81.75	-0.64087
81.8125	-0.39673		81.8125	-0.36621		81.75	-0.61035
81.8438	-0.27466		81.8125	-0.39673		81.875	-0.73242
81.9062	-0.15259		81.875	-0.39673		81.875	-0.79346
81.9688	-0.12207		81.9375	-0.42725		82	-0.85449
82	-0.24414		82	-0.39673		82	-0.67139
82.0625	-0.39673		82.0625	-0.30518		82	-0.67139
82.0938	-0.30518		82.0625	-0.36621		82.125	-0.73242
82.1562	-0.27466		82.125	-0.27466		82.125	-0.73242
82.2188	-0.15259		82.1875	-0.36621		82.25	-0.79346
82.25	-0.21362		82.25	-0.39673		82.25	-0.73242
82.3125	-0.27466		82.3125	-0.21362		82.25	-0.67139
82.3438	-0.24414		82.3125	-0.30518		82.375	-0.64087
82.4062	-0.24414		82.375	-0.12207		82.375	-0.67139
82.4688	-0.24414		82.4375	-0.33569		82.5	-0.61035
82.5	-0.33569		82.5	-0.39673		82.5	-0.7019
82.5625	-0.27466		82.5625	-0.30518		82.5	-0.64087
82.5938	-0.36621		82.5625	-0.36621		82.625	-0.67139
82.6562	-0.36621		82.625	-0.24414		82.625	-0.64087
82.7188	-0.42725		82.6875	-0.24414		82.75	-0.64087
82.75	-0.36621		82.75	-0.27466		82.75	-0.61035
82.8125	-0.18311		82.8125	-0.24414		82.75	-0.73242
82.8438	-0.30518		82.8125	-0.24414		82.875	-0.67139
82.9062	-0.42725		82.875	-0.21362		82.875	-0.5188
82.9688	-0.45776		82.9375	-0.15259		83	-0.57983
83	-0.42725		83	-0.27466		83	-0.57983
83.0625	-0.27466		83.0625	-0.27466		83	-0.67139
83.0938	-0.33569		83.0625	-0.30518		83.125	-0.48828
83.1562	-0.42725		83.125	-0.33569		83.125	-0.5188
83.2188	-0.5188		83.1875	-0.30518		83.25	-0.5188
83.25	-0.42725		83.25	-0.24414		83.25	-0.57983
83.3125	-0.42725		83.3125	-0.27466		83.25	-0.45776
83.3438	-0.48828		83.3125	-0.33569		83.375	-0.42725
83.4062	-0.5188		83.375	-0.33569		83.375	-0.33569
83.4688	-0.54932		83.4375	-0.33569		83.5	-0.45776
83.5	-0.54932		83.5	-0.21362		83.5	-0.54932
83.5625	-0.57983		83.5625	-0.21362		83.5	-0.5188
83.5938	-0.54932		83.5625	-0.33569		83.625	-0.33569
83.6562	-0.54932		83.625	-0.39673		83.625	-0.39673
83.7188	-0.5188		83.6875	-0.36621		83.75	-0.33569
83.75	-0.54932		83.75	-0.27466		83.75	-0.42725
83.8125	-0.64087		83.8125	-0.21362		83.75	-0.39673
83.8438	-0.64087		83.8125	-0.24414		83.875	-0.30518
83.9062	-0.54932		83.875	-0.36621		83.875	-0.30518
83.9688	-0.61035		83.9375	-0.39673		84	-0.30518
84	-0.7019		84	-0.36621		84	-0.18311
84.0625	-0.76294		84.0625	-0.30518		84	-0.27466
84.0938	-0.7019		84.0625	-0.33569		84.125	-0.33569
84.1562	-0.64087		84.125	-0.42725		84.125	-0.33569
84.2188	-0.54932		84.1875	-0.5188		84.25	-0.39673
84.25	-0.73242		84.25	-0.5188		84.25	-0.21362
84.3125	-0.79346		84.3125	-0.45776		84.25	-0.27466
84.3438	-0.61035		84.3125	-0.42725		84.375	-0.33569
84.4062	-0.7019		84.375	-0.5188		84.375	-0.39673
84.4688	-0.61035		84.4375	-0.54932		84.5	-0.24414
84.5	-0.73242		84.5	-0.45776		84.5	-0.15259
84.5625	-0.79346		84.5625	-0.48828		84.5	-0.15259
84.5938	-0.76294		84.5625	-0.64087		84.625	-0.24414
84.6562	-0.73242		84.625	-0.48828		84.625	-0.30518
84.7188	-0.79346		84.6875	-0.42725		84.75	-0.30518
84.75	-0.76294		84.75	-0.45776		84.75	-0.18311
84.8125	-0.67139		84.8125	-0.54932		84.75	-0.24414
84.8438	-0.7019		84.8125	-0.73242		84.875	-0.21362
84.9062	-0.73242		84.875	-0.64087		84.875	-0.27466
84.9688	-0.73242		84.9375	-0.5188		85	-0.33569
85	-0.64087		85	-0.54932		85	-0.33569
85.0625	-0.67139		85.0625	-0.7019		85	-0.30518
85.0938	-0.73242		85.0625	-0.67139		85.125	-0.30518
85.1562	-0.85449		85.125	-0.61035		85.125	-0.18311
85.2188	-0.79346		85.1875	-0.54932		85.25	-0.36621
85.25	-0.67139		85.25	-0.64087		85.25	-0.33569
85.3125	-0.76294		85.3125	-0.67139		85.25	-0.42725
85.3438	-0.64087		85.3125	-0.7019		85.375	-0.21362
85.4062	-0.76294		85.375	-0.64087		85.375	-0.12207
85.4688	-0.79346		85.4375	-0.73242		85.5	-0.24414
85.5	-0.73242		85.5	-0.79346		85.5	-0.45776
85.5625	-0.73242		85.5625	-0.67139		85.5	-0.42725
85.5938	-0.54932		85.5625	-0.54932		85.625	-0.45776
85.6562	-0.54932		85.625	-0.64087		85.625	-0.18311
85.7188	-0.57983		85.6875	-0.76294		85.75	-0.30518
85.75	-0.7019		85.75	-0.82397		85.75	-0.45776
85.8125	-0.73242		85.8125	-0.64087		85.75	-0.36621
85.8438	-0.61035		85.8125	-0.61035		85.875	-0.39673
85.9062	-0.5188		85.875	-0.7019		85.875	-0.39673
85.9688	-0.64087		85.9375	-0.79346		86	-0.36621
86	-0.73242		86	-0.82397		86	-0.42725
86.0625	-0.7019		86.0625	-0.61035		86	-0.33569
86.0938	-0.7019		86.0625	-0.67139		86.125	-0.39673
86.1562	-0.5188		86.125	-0.79346		86.125	-0.48828
86.2188	-0.57983		86.1875	-0.82397		86.25	-0.39673
86.25	-0.5188		86.25	-0.76294		86.25	-0.30518
86.3125	-0.67139		86.3125	-0.54932		86.25	-0.33569
86.3438	-0.64087		86.3125	-0.67139		86.375	-0.45776
86.4062	-0.5188		86.375	-0.79346		86.375	-0.57983
86.4688	-0.54932		86.4375	-0.79346		86.5	-0.45776
86.5	-0.54932		86.5	-0.61035		86.5	-0.42725
86.5625	-0.64087		86.5625	-0.64087		86.5	-0.36621
86.5938	-0.54932		86.5625	-0.7019		86.625	-0.42725
86.6562	-0.5188		86.625	-0.76294		86.625	-0.5188
86.7188	-0.57983		86.6875	-0.73242		86.75	-0.39673
86.75	-0.5188		86.75	-0.61035		86.75	-0.45776
86.8125	-0.48828		86.8125	-0.7019		86.75	-0.39673
86.8438	-0.54932		86.8125	-0.7019		86.875	-0.45776
86.9062	-0.5188		86.875	-0.7019		86.875	-0.5188
86.9688	-0.61035		86.9375	-0.54932		87	-0.36621
87	-0.54932		87	-0.64087		87	-0.5188
87.0625	-0.39673		87.0625	-0.76294		87	-0.45776
87.0938	-0.57983		87.0625	-0.67139		87.125	-0.39673
87.1562	-0.5188		87.125	-0.61035		87.125	-0.39673
87.2188	-0.57983		87.1875	-0.42725		87.25	-0.45776
87.25	-0.54932		87.25	-0.67139		87.25	-0.48828
87.3125	-0.48828		87.3125	-0.82397		87.25	-0.57983
87.3438	-0.57983		87.3125	-0.67139		87.375	-0.36621
87.4062	-0.61035		87.375	-0.61035		87.375	-0.45776
87.4688	-0.57983		87.4375	-0.45776		87.5	-0.45776
87.5	-0.45776		87.5	-0.57983		87.5	-0.5188
87.5625	-0.42725		87.5625	-0.7019		87.5	-0.64087
87.5938	-0.48828		87.5625	-0.64087		87.625	-0.36621
87.6562	-0.64087		87.625	-0.54932		87.625	-0.48828
87.7188	-0.57983		87.6875	-0.54932		87.75	-0.45776
87.75	-0.5188		87.75	-0.54932		87.75	-0.54932
87.8125	-0.5188		87.8125	-0.54932		87.75	-0.5188
87.8438	-0.48828		87.8125	-0.48828		87.875	-0.48828
87.9062	-0.5188		87.875	-0.61035		87.875	-0.45776
87.9688	-0.45776		87.9375	-0.7019		88	-0.5188
88	-0.54932		88	-0.5188		88	-0.54932
88.0625	-0.45776		88.0625	-0.48828		88	-0.42725
88.0938	-0.54932		88.0625	-0.39673		88.125	-0.45776
88.1562	-0.5188		88.125	-0.57983		88.125	-0.45776
88.2188	-0.48828		88.1875	-0.73242		88.25	-0.45776
88.25	-0.57983		88.25	-0.61035		88.25	-0.42725
88.3125	-0.64087		88.3125	-0.42725		88.25	-0.48828
88.3438	-0.61035		88.3125	-0.42725		88.375	-0.42725
88.4062	-0.42725		88.375	-0.61035		88.375	-0.5188
88.4688	-0.39673		88.4375	-0.64087		88.5	-0.5188
88.5	-0.5188		88.5	-0.48828		88.5	-0.39673
88.5625	-0.64087		88.5625	-0.5188		88.5	-0.5188
88.5938	-0.54932		88.5625	-0.5188		88.625	-0.45776
88.6562	-0.54932		88.625	-0.57983		88.625	-0.5188
88.7188	-0.36621		88.6875	-0.64087		88.75	-0.45776
88.75	-0.48828		88.75	-0.45776		88.75	-0.36621
88.8125	-0.54932		88.8125	-0.61035		88.75	-0.5188
88.8438	-0.45776		88.8125	-0.64087		88.875	-0.54932
88.9062	-0.54932		88.875	-0.5188		88.875	-0.5188
88.9688	-0.48828		88.9375	-0.5188		89	-0.45776
89	-0.54932		89	-0.42725		89	-0.39673
89.0625	-0.48828		89.0625	-0.61035		89	-0.45776
89.0938	-0.54932		89.0625	-0.67139		89.125	-0.48828
89.1562	-0.57983		89.125	-0.54932		89.125	-0.5188
89.2188	-0.64087		89.1875	-0.39673		89.25	-0.5188
89.25	-0.5188		89.25	-0.45776		89.25	-0.45776
89.3125	-0.45776		89.3125	-0.57983		89.25	-0.39673
89.3438	-0.42725		89.3125	-0.61035		89.375	-0.45776
89.4062	-0.54932		89.375	-0.45776		89.375	-0.5188
89.4688	-0.64087		89.4375	-0.45776		89.5	-0.54932
89.5	-0.5188		89.5	-0.57983		89.5	-0.33569
89.5625	-0.5188		89.5625	-0.61035		89.5	-0.39673
89.5938	-0.42725		89.5625	-0.61035		89.625	-0.33569
89.6562	-0.61035		89.625	-0.48828		89.625	-0.36621
89.7188	-0.54932		89.6875	-0.45776		89.75	-0.54932
89.75	-0.54932		89.75	-0.57983		89.75	-0.5188
89.8125	-0.48828		89.8125	-0.54932		89.75	-0.57983
89.8438	-0.5188		89.8125	-0.48828		89.875	-0.36621
89.9062	-0.61035		89.875	-0.36621		89.875	-0.33569
89.9688	-0.5188		89.9375	-0.57983		90	-0.54932
90	-0.48828		90	-0.48828		90	-0.5188
90.0625	-0.57983		90.0625	-0.5188		90	-0.48828
90.0938	-0.5188		90.0625	-0.42725		90.125	-0.45776
90.1562	-0.61035		90.125	-0.48828		90.125	-0.27466
90.2188	-0.61035		90.1875	-0.57983		90.25	-0.39673
90.25	-0.57983		90.25	-0.48828		90.25	-0.45776
90.3125	-0.67139		90.3125	-0.42725		90.25	-0.48828
90.3438	-0.61035		90.3125	-0.54932		90.375	-0.42725
90.4062	-0.5188		90.375	-0.5188		90.375	-0.33569
90.4688	-0.54932		90.4375	-0.5188		90.5	-0.39673
90.5	-0.61035		90.5	-0.54932		90.5	-0.30518
90.5625	-0.67139		90.5625	-0.42725		90.5	-0.45776
90.5938	-0.64087		90.5625	-0.54932		90.625	-0.45776
90.6562	-0.5188		90.625	-0.5188		90.625	-0.48828
90.7188	-0.61035		90.6875	-0.54932		90.75	-0.36621
90.75	-0.67139		90.75	-0.57983		90.75	-0.21362
90.8125	-0.85449		90.8125	-0.5188		90.75	-0.30518
90.8438	-0.64087		90.8125	-0.48828		90.875	-0.36621
90.9062	-0.64087		90.875	-0.48828		90.875	-0.33569
90.9688	-0.57983		90.9375	-0.61035		91	-0.27466
91	-0.61035		91	-0.54932		91	-0.15259
91.0625	-0.76294		91.0625	-0.54932		91	-0.24414
91.0938	-0.7019		91.0625	-0.64087		91.125	-0.39673
91.1562	-0.73242		91.125	-0.5188		91.125	-0.39673
91.2188	-0.67139		91.1875	-0.5188		91.25	-0.33569
91.25	-0.67139		91.25	-0.64087		91.25	-0.21362
91.3125	-0.57983		91.3125	-0.57983		91.25	-0.21362
91.3438	-0.7019		91.3125	-0.64087		91.375	-0.27466
91.4062	-0.7019		91.375	-0.45776		91.375	-0.18311
91.4688	-0.85449		91.4375	-0.39673		91.5	-0.27466
91.5	-0.67139		91.5	-0.57983		91.5	-0.24414
91.5625	-0.7019		91.5625	-0.7019		91.5	-0.21362
91.5938	-0.79346		91.5625	-0.67139		91.625	-0.15259
91.6562	-0.91553		91.625	-0.57983		91.625	-0.15259
91.7188	-0.91553		91.6875	-0.45776		91.75	-0.21362
91.75	-0.76294		91.75	-0.61035		91.75	-0.33569
91.8125	-0.64087		91.8125	-0.61035		91.75	-0.36621
91.8438	-0.61035		91.8125	-0.64087		91.875	-0.12207
91.9062	-0.79346		91.875	-0.57983		91.875	-0.12207
91.9688	-0.79346		91.9375	-0.5188		92	-0.15259
92	-0.82397		92	-0.61035		92	-0.27466
92.0625	-0.79346		92.0625	-0.57983		92	-0.27466
92.0938	-0.76294		92.0625	-0.67139		92.125	-0.24414
92.1562	-0.82397		92.125	-0.7019		92.125	-0.21362
92.2188	-0.73242		92.1875	-0.79346		92.25	-0.30518
92.25	-0.7019		92.25	-0.67139		92.25	-0.30518
92.3125	-0.79346		92.3125	-0.7019		92.25	-0.15259
92.3438	-0.73242		92.3125	-0.64087		92.375	-0.18311
92.4062	-0.7019		92.375	-0.79346		92.375	-0.21362
92.4688	-0.73242		92.4375	-0.76294		92.5	-0.24414
92.5	-0.7019		92.5	-0.67139		92.5	-0.36621
92.5625	-0.7019		92.5625	-0.61035		92.5	-0.24414
92.5938	-0.76294		92.5625	-0.7019		92.625	-0.27466
92.6562	-0.64087		92.625	-0.76294		92.625	-0.33569
92.7188	-0.73242		92.6875	-0.67139		92.75	-0.36621
92.75	-0.64087		92.75	-0.76294		92.75	-0.30518
92.8125	-0.7019		92.8125	-0.61035		92.75	-0.27466
92.8438	-0.61035		92.8125	-0.73242		92.875	-0.33569
92.9062	-0.64087		92.875	-0.82397		92.875	-0.5188
92.9688	-0.64087		92.9375	-0.82397		93	-0.39673
93	-0.67139		93	-0.7019		93	-0.36621
93.0625	-0.67139		93.0625	-0.76294		93	-0.39673
93.0938	-0.61035		93.0625	-0.67139		93.125	-0.54932
93.1562	-0.61035		93.125	-0.67139		93.125	-0.48828
93.2188	-0.5188		93.1875	-0.61035		93.25	-0.36621
93.25	-0.5188		93.25	-0.64087		93.25	-0.42725
93.3125	-0.57983		93.3125	-0.73242		93.25	-0.5188
93.3438	-0.57983		93.3125	-0.79346		93.375	-0.67139
93.4062	-0.48828		93.375	-0.73242		93.375	-0.54932
93.4688	-0.42725		93.4375	-0.7019		93.5	-0.54932
93.5	-0.33569		93.5	-0.73242		93.5	-0.5188
93.5625	-0.45776		93.5625	-0.82397		93.5	-0.61035
93.5938	-0.5188		93.5625	-0.7019		93.625	-0.67139
93.6562	-0.54932		93.625	-0.7019		93.625	-0.54932
93.7188	-0.39673		93.6875	-0.64087		93.75	-0.54932
93.75	-0.33569		93.75	-0.76294		93.75	-0.61035
93.8125	-0.33569		93.8125	-0.73242		93.75	-0.67139
93.8438	-0.39673		93.8125	-0.67139		93.875	-0.57983
93.9062	-0.48828		93.875	-0.61035		93.875	-0.61035
93.9688	-0.42725		93.9375	-0.57983		94	-0.73242
94	-0.33569		94	-0.7019		94	-0.76294
94.0625	-0.24414		94.0625	-0.61035		94	-0.79346
94.0938	-0.24414		94.0625	-0.64087		94.125	-0.61035
94.1562	-0.39673		94.125	-0.5188		94.125	-0.67139
94.2188	-0.33569		94.1875	-0.64087		94.25	-0.76294
94.25	-0.36621		94.25	-0.57983		94.25	-0.79346
94.3125	-0.33569		94.3125	-0.64087		94.25	-0.76294
94.3438	-0.27466		94.3125	-0.61035		94.375	-0.61035
94.4062	-0.27466		94.375	-0.54932		94.375	-0.61035
94.4688	-0.33569		94.4375	-0.64087		94.5	-0.79346
94.5	-0.39673		94.5	-0.45776		94.5	-0.82397
94.5625	-0.45776		94.5625	-0.48828		94.5	-0.7019
94.5938	-0.30518		94.5625	-0.54932		94.625	-0.7019
94.6562	-0.15259		94.625	-0.54932		94.625	-0.67139
94.7188	-0.24414		94.6875	-0.48828		94.75	-0.82397
94.75	-0.33569		94.75	-0.36621		94.75	-0.76294
94.8125	-0.39673		94.8125	-0.27466		94.75	-0.7019
94.8438	-0.36621		94.8125	-0.45776		94.875	-0.76294
94.9062	-0.18311		94.875	-0.54932		94.875	-0.67139
94.9688	-0.21362		94.9375	-0.42725		95	-0.7019
95	-0.24414		95	-0.42725		95	-0.7019
95.0625	-0.36621		95.0625	-0.24414		95	-0.67139
95.0938	-0.27466		95.0625	-0.39673		95.125	-0.79346
95.1562	-0.24414		95.125	-0.45776		95.125	-0.76294
95.2188	-0.24414		95.1875	-0.42725		95.25	-0.61035
95.25	-0.27466		95.25	-0.39673		95.25	-0.57983
95.3125	-0.30518		95.3125	-0.33569		95.25	-0.67139
95.3438	-0.30518		95.3125	-0.36621		95.375	-0.76294
95.4062	-0.30518		95.375	-0.27466		95.375	-0.7019
95.4688	-0.36621		95.4375	-0.33569		95.5	-0.67139
95.5	-0.27466		95.5	-0.39673		95.5	-0.54932
95.5625	-0.18311		95.5625	-0.45776		95.5	-0.61035
95.5938	-0.33569		95.5625	-0.36621		95.625	-0.73242
95.6562	-0.33569		95.625	-0.27466		95.625	-0.7019
95.7188	-0.48828		95.6875	-0.21362		95.75	-0.73242
95.75	-0.33569		95.75	-0.39673		95.75	-0.67139
95.8125	-0.24414		95.8125	-0.36621		95.75	-0.64087
95.8438	-0.33569		95.8125	-0.33569		95.875	-0.64087
95.9062	-0.33569		95.875	-0.21362		95.875	-0.7019
95.9688	-0.39673		95.9375	-0.18311		96	-0.57983
96	-0.27466		96	-0.33569		96	-0.7019
96.0625	-0.24414		96.0625	-0.33569		96	-0.54932
96.0938	-0.39673		96.0625	-0.30518		96.125	-0.48828
96.1562	-0.39673		96.125	-0.27466		96.125	-0.57983
96.2188	-0.36621		96.1875	-0.21362		96.25	-0.54932
96.25	-0.39673		96.25	-0.30518		96.25	-0.7019
96.3125	-0.30518		96.3125	-0.27466		96.25	-0.54932
96.3438	-0.42725		96.3125	-0.33569		96.375	-0.5188
96.4062	-0.45776		96.375	-0.33569		96.375	-0.5188
96.4688	-0.36621		96.4375	-0.33569		96.5	-0.5188
96.5	-0.42725		96.5	-0.18311		96.5	-0.64087
96.5625	-0.39673		96.5625	-0.33569		96.5	-0.54932
96.5938	-0.45776		96.5625	-0.27466		96.625	-0.61035
96.6562	-0.42725		96.625	-0.42725		96.625	-0.54932
96.7188	-0.45776		96.6875	-0.30518		96.75	-0.54932
96.75	-0.48828		96.75	-0.24414		96.75	-0.5188
96.8125	-0.42725		96.8125	-0.33569		96.75	-0.61035
96.8438	-0.45776		96.8125	-0.33569		96.875	-0.54932
96.9062	-0.36621		96.875	-0.33569		96.875	-0.57983
96.9688	-0.36621		96.9375	-0.36621		97	-0.48828
97	-0.54932		97	-0.36621		97	-0.39673
97.0625	-0.5188		97.0625	-0.36621		97	-0.54932
97.0938	-0.42725		97.0625	-0.36621		97.125	-0.5188
97.1562	-0.39673		97.125	-0.42725		97.125	-0.54932
97.2188	-0.33569		97.1875	-0.30518		97.25	-0.45776
97.25	-0.5188		97.25	-0.33569		97.25	-0.5188
97.3125	-0.54932		97.3125	-0.42725		97.25	-0.54932
97.3438	-0.45776		97.3125	-0.45776		97.375	-0.48828
97.4062	-0.48828		97.375	-0.36621		97.375	-0.61035
97.4688	-0.36621		97.4375	-0.45776		97.5	-0.48828
97.5	-0.45776		97.5	-0.33569		97.5	-0.48828
97.5625	-0.45776		97.5625	-0.54932		97.5	-0.54932
97.5938	-0.48828		97.5625	-0.36621		97.625	-0.48828
97.6562	-0.54932		97.625	-0.33569		97.625	-0.45776
97.7188	-0.48828		97.6875	-0.45776		97.75	-0.48828
97.75	-0.39673		97.75	-0.39673		97.75	-0.42725
97.8125	-0.42725		97.8125	-0.39673		97.75	-0.54932
97.8438	-0.48828		97.8125	-0.30518		97.875	-0.48828
97.9062	-0.61035		97.875	-0.27466		97.875	-0.45776
97.9688	-0.61035		97.9375	-0.45776		98	-0.57983
98	-0.48828		98	-0.48828		98	-0.48828
98.0625	-0.42725		98.0625	-0.5188		98	-0.61035
98.0938	-0.48828		98.0625	-0.42725		98.125	-0.48828
98.1562	-0.57983		98.125	-0.36621		98.125	-0.54932
98.2188	-0.54932		98.1875	-0.48828		98.25	-0.48828
98.25	-0.48828		98.25	-0.54932		98.25	-0.5188
98.3125	-0.39673		98.3125	-0.42725		98.25	-0.48828
98.3438	-0.42725		98.3125	-0.57983		98.375	-0.39673
98.4062	-0.45776		98.375	-0.42725		98.375	-0.5188
98.4688	-0.5188		98.4375	-0.45776		98.5	-0.5188
98.5	-0.48828		98.5	-0.42725		98.5	-0.54932
98.5625	-0.54932		98.5625	-0.5188		98.5	-0.42725
98.5938	-0.48828		98.5625	-0.54932		98.625	-0.45776
98.6562	-0.48828		98.625	-0.48828		98.625	-0.48828
98.7188	-0.45776		98.6875	-0.42725		98.75	-0.64087
98.75	-0.39673		98.75	-0.39673		98.75	-0.48828
98.8125	-0.61035		98.8125	-0.48828		98.75	-0.54932
98.8438	-0.5188		98.8125	-0.5188		98.875	-0.42725
98.9062	-0.45776		98.875	-0.54932		98.875	-0.39673
98.9688	-0.5188		98.9375	-0.48828		99	-0.67139
99	-0.45776		99	-0.45776		99	-0.54932
99.0625	-0.54932		99.0625	-0.39673		99	-0.54932
99.0938	-0.42725		99.0625	-0.57983		99.125	-0.45776
99.1562	-0.39673		99.125	-0.54932		99.125	-0.45776
99.2188	-0.42725		99.1875	-0.54932		99.25	-0.57983
99.25	-0.45776		99.25	-0.48828		99.25	-0.5188
99.3125	-0.54932		99.3125	-0.39673		99.25	-0.57983
99.3438	-0.39673		99.3125	-0.45776		99.375	-0.64087
99.4062	-0.42725		99.375	-0.5188		99.375	-0.54932
99.4688	-0.45776		99.4375	-0.5188		99.5	-0.45776
99.5	-0.48828		99.5	-0.54932		99.5	-0.5188
99.5625	-0.57983		99.5625	-0.45776		99.5	-0.61035
99.5938	-0.39673		99.5625	-0.36621		99.625	-0.67139
99.6562	-0.39673		99.625	-0.42725		99.625	-0.54932
99.7188	-0.36621		99.6875	-0.42725		99.75	-0.5188
99.75	-0.39673		99.75	-0.57983		99.75	-0.45776
99.8125	-0.5188		99.8125	-0.48828		99.75	-0.57983
[truncated: 98,004 more rows]

## Sheet: Figure 4 B iii
ACSF	2-APB	ACSF
3.04	0	2.38
0.69	0.07	0.22
0.97	0.05	0.27
1.1	0.01	0.125
0.98	0.18	0.2
1.32	0	0
0.73	0	0.06
0.76	0.22	1.01
0.59	0	0.46
3.45	0	1.96
1.09	0.19	0.77
1.07	0	0.07
