# Supplementary material for: The cation channel mechanisms of subthreshold inward depolarizing currents in the mice VTA dopaminergic neurons and their roles in the chronic-stress-induced depression-like behavior
Source: eLife. 2024 Dec 6;12:RP88319. doi: 10.7554/eLife.88319 (PMC11623934; doi:10.7554/eLife.88319)
Supplement: Figure 4—source data 4. [file elife-88319-fig4-data4.xlsx]

## Sheet: Figure 4 C i
time-course
Time(min)	Firing rate(Hz)
0.39	1.79487
0.78	1.41026
1.17	1.83761
1.56	1.83761
1.95	1.83761
2.34	1.83761
2.73	1.79487
3.12	1.83761
3.51	1.83761
3.9	1.88034
4.29	1.88034
4.68	1.83761
5.07	1.88034
5.46	1.79487
5.85	1.83761
6.24	1.66667
6.63	1.5812
7.02	1.41026
7.41	1.36752
7.8	1.28205
8.19	1.19658
8.58	1.15385
8.97	1.15385
9.36	1.11111
9.75	1.06838
10.14	1.06838
10.53	0.98291
10.92	1.02564
11.31	0.94017
11.7	0.94017
12.09	0.94017
12.48	0.38462
12.87	0.51282
13.26	0.17094
13.65	0
14.04	0
14.43	0
14.82	0.04274
15.21	0.08547
15.6	0
15.99	0
16.38	0
16.77	0
17.16	0
17.55	0
17.94	0
18.33	0
18.72	0
19.11	0
19.5	0
19.89	0
20.28	0
20.67	0
21.06	0.04274
21.45	0
21.84	0
22.23	0.04274
22.62	0.04274
23.01	0
23.4	0
23.79	0.04274
24.18	0
24.57	0
24.96	0
25.35	0
25.74	0.08547
26.13	0
26.52	0
26.91	0
27.3	0
27.69	0
28.08	0
28.47	0.17094
28.86	0.38462
29.25	0.17094
29.64	0.68376
30.03	0.59829
30.42	0.68376
30.81	0.38462
31.2	0.38462
31.59	0.25641
31.98	0.51282
32.37	0.34188
32.76	0.17094
33.15	0.42735
33.54	0.55556
33.93	0.38462
34.32	0.68376
34.71	0.89744
35.1	0.89744
35.49	0.98291
35.88	1.06838
36.27	1.06838
36.66	1.11111
37.05	1.15385
37.44	1.23932
37.83	1.28205
38.22	1.28205
38.61	1.32479
39	1.41026

## Sheet: Figure 4 C ii
Example traces
acsf			Larixyl acetate			acsf
Time(ms)	RMP(mv)		Time(ms)	RMP(mv)		Time(ms)	RMP(mv)
0	-0.01648		0	-0.01221		0	-0.00916
0.0625	-0.0177		0.0625	-0.01282		0	-0.00793
0.10938	-0.0177		0.125	-0.02014		0	-0.00305
0.15625	-0.01648		0.1875	-0.02686		0.25	-0.00061
0.20313	-0.01892		0.25	-0.03296		0.25	0.00305
0.25	-0.01953		0.25	-0.03357		0.25	0.0061
0.3125	-0.02625		0.3125	-0.0293		0.25	0.00488
0.35938	-0.0293		0.375	-0.02441		0.25	0.00061
0.40625	-0.02991		0.4375	-0.02197		0.5	-0.00549
0.45313	-0.02258		0.5	-0.02319		0.5	-0.00854
0.5	-0.01709		0.5	-0.02441		0.5	-0.0104
0.5625	-0.01282		0.5625	-0.03357		0.5	-0.00977
0.60938	-0.01099		0.625	-0.03418		0.5	-0.00977
0.65625	-0.0116		0.6875	-0.03296		0.75	-0.00488
0.70313	-0.00732		0.75	-0.0238		0.75	-0.00183
0.75	-0.01099		0.75	-0.01953		0.75	0.00183
0.8125	-0.01953		0.8125	-0.02014		0.75	0.00122
0.85938	-0.02808		0.875	-0.02502		0.75	-0.00183
0.90625	-0.033		0.9375	-0.02808		1	-0.0104
0.95313	-0.03418		1	-0.02686		1	-0.0147
1	-0.02808		1	-0.02014		1	-0.0183
1.0625	-0.02014		1.0625	-0.01404		1	-0.0195
1.10938	-0.01709		1.125	-0.0061		1	-0.0201
1.15625	-0.01465		1.1875	0		1.25	-0.0214
1.20313	-0.02075		1.25	0.00244		1.25	-0.0214
1.25	-0.02502		1.25	0		1.25	-0.0269
1.3125	-0.03113		1.3125	-0.00427		1.25	-0.0317
1.35938	-0.03296		1.375	-0.01343		1.25	-0.0324
1.40625	-0.03723		1.4375	-0.01587		1.5	-0.033
1.45313	-0.04211		1.5	-0.02319		1.5	-0.0305
1.5	-0.04883		1.5	-0.02625		1.5	-0.0281
1.5625	-0.0531		1.5625	-0.02625		1.5	-0.0299
1.60938	-0.0592		1.625	-0.02258		1.5	-0.0287
1.65625	-0.06592		1.6875	-0.02014		1.75	-0.0281
1.70313	-0.07141		1.75	-0.01892		1.75	-0.0293
1.75	-0.07507		1.75	-0.01404		1.75	-0.0293
1.8125	-0.07263		1.8125	-0.00916		1.75	-0.0287
1.85938	-0.07141		1.875	-0.00305		1.75	-0.0311
1.90625	-0.0708		1.9375	-0.00549		2	-0.0281
1.95313	-0.06897		2	-0.00854		2	-0.0366
2	-0.06836		2	-0.0061		2	-0.0446
2.0625	-0.06409		2.0625	-0.00122		2	-0.0574
2.10938	-0.06042		2.125	0.00061		2	-0.0653
2.15625	-0.05737		2.1875	-0.00122		2.25	-0.072
2.20313	-0.05615		2.25	-0.00854		2.25	-0.0751
2.25	-0.05493		2.25	-0.01038		2.25	-0.0708
2.3125	-0.0592		2.3125	-0.01221		2.25	-0.0641
2.35938	-0.06348		2.375	-0.01343		2.25	-0.0537
2.40625	-0.06409		2.4375	-0.01221		2.5	-0.0525
2.45313	-0.06042		2.5	-0.01099		2.5	-0.0507
2.5	-0.05493		2.5	-0.01099		2.5	-0.0586
2.5625	-0.0531		2.5625	-0.0116		2.5	-0.061
2.60938	-0.05615		2.625	-0.01465		2.5	-0.0665
2.65625	-0.06042		2.6875	-0.01343		2.75	-0.0684
2.70313	-0.06287		2.75	-0.01526		2.75	-0.072
2.75	-0.0708		2.75	-0.01831		2.75	-0.0714
2.8125	-0.07568		2.8125	-0.02563		2.75	-0.0696
2.85938	-0.07996		2.875	-0.03296		2.75	-0.0708
2.90625	-0.08057		2.9375	-0.03601		3	-0.0714
2.95313	-0.07874		3	-0.03357		3	-0.0751
3	-0.0769		3	-0.02869		3	-0.0751
3.0625	-0.07141		3.0625	-0.02686		3	-0.0818
3.10938	-0.06165		3.125	-0.03052		3	-0.0848
3.15625	-0.05066		3.1875	-0.03845		3.25	-0.0855
3.20313	-0.04333		3.25	-0.04456		3.25	-0.0818
3.25	-0.0415		3.25	-0.05676		3.25	-0.0806
3.3125	-0.04272		3.3125	-0.06226		3.25	-0.083
3.35938	-0.04211		3.375	-0.06531		3.25	-0.0897
3.40625	-0.0415		3.4375	-0.06042		3.5	-0.0922
3.45313	-0.04395		3.5	-0.06104		3.5	-0.0867
3.5	-0.04333		3.5	-0.05981		3.5	-0.0824
3.5625	-0.04761		3.5625	-0.06226		3.5	-0.0726
3.60938	-0.04944		3.625	-0.06775		3.5	-0.0641
3.65625	-0.04761		3.6875	-0.06775		3.75	-0.0562
3.70313	-0.03906		3.75	-0.06958		3.75	-0.0507
3.75	-0.02808		3.75	-0.06897		3.75	-0.047
3.8125	-0.01953		3.8125	-0.06653		3.75	-0.0482
3.85938	-0.01587		3.875	-0.06104		3.75	-0.0458
3.90625	-0.01099		3.9375	-0.06042		4	-0.044
3.95313	-0.01038		4	-0.05981		4	-0.0464
4	-0.00977		4	-0.06287		4	-0.0488
4.0625	-0.01099		4.0625	-0.06287		4	-0.0488
4.10938	-0.01404		4.125	-0.06287		4	-0.0464
4.15625	-0.0177		4.1875	-0.06226		4.25	-0.0427
4.20313	-0.01526		4.25	-0.06226		4.25	-0.0385
4.25	-0.01221		4.25	-0.06226		4.25	-0.0324
4.3125	-0.00183		4.3125	-0.06165		4.25	-0.0244
4.35938	0.00671		4.375	-0.06653		4.25	-0.0153
4.40625	0.01587		4.4375	-0.07019		4.5	-0.0116
4.45313	0.02441		4.5	-0.07507		4.5	-0.0116
4.5	0.03479		4.5	-0.07446		4.5	-0.011
4.5625	0.03357		4.5625	-0.07507		4.5	-0.00549
4.60938	0.03357		4.625	-0.07324		4.5	0.00061
4.65625	0.03052		4.6875	-0.07324		4.75	0.00549
4.70313	0.03235		4.75	-0.06775		4.75	0.00977
4.75	0.03723		4.75	-0.0592		4.75	0.0128
4.8125	0.04211		4.8125	-0.05432		4.75	0.0177
4.85938	0.05005		4.875	-0.0531		4.75	0.0195
4.90625	0.05737		4.9375	-0.05188		5	0.0208
4.95313	0.06348		5	-0.05554		5	0.0238
5	0.06226		5	-0.05737		5	0.0238
5.0625	0.0647		5.0625	-0.05859		5	0.0238
5.10938	0.06165		5.125	-0.0592		5	0.0232
5.15625	0.06226		5.1875	-0.05493		5.25	0.0244
5.20313	0.06042		5.25	-0.04944		5.25	0.0232
5.25	0.05981		5.25	-0.04761		5.25	0.0256
5.3125	0.06104		5.3125	-0.04639		5.25	0.022
5.35938	0.06409		5.375	-0.04456		5.25	0.0226
5.40625	0.06836		5.4375	-0.04395		5.5	0.0269
5.45313	0.06409		5.5	-0.04333		5.5	0.0299
5.5	0.05615		5.5	-0.04395		5.5	0.033
5.5625	0.04761		5.5625	-0.04272		5.5	0.0311
5.60938	0.04089		5.625	-0.03601		5.5	0.0293
5.65625	0.03662		5.6875	-0.02441		5.75	0.0287
5.70313	0.04028		5.75	-0.01465		5.75	0.0281
5.75	0.04333		5.75	-0.01038		5.75	0.0256
5.8125	0.05005		5.8125	-0.00916		5.75	0.0238
5.85938	0.0531		5.875	-0.00916		5.75	0.0226
5.90625	0.05249		5.9375	-0.0061		6	0.025
5.95313	0.047		6	-0.00732		6	0.0299
6	0.04089		6	-0.00061		6	0.0311
6.0625	0.03662		6.0625	0.00244		6	0.0366
6.10938	0.03235		6.125	0.01221		6	0.0409
6.15625	0.03418		6.1875	0.01831		6.25	0.0507
6.20313	0.0354		6.25	0.02625		6.25	0.0531
6.25	0.03967		6.25	0.03296		6.25	0.0549
6.3125	0.0415		6.3125	0.03479		6.25	0.0555
6.35938	0.04089		6.375	0.03296		6.25	0.0574
6.40625	0.04028		6.4375	0.02808		6.5	0.0574
6.45313	0.03967		6.5	0.02747		6.5	0.0543
6.5	0.03662		6.5	0.02869		6.5	0.0549
6.5625	0.03174		6.5625	0.04089		6.5	0.058
6.60938	0.02747		6.625	0.04456		6.5	0.061
6.65625	0.02319		6.6875	0.04944		6.75	0.0562
6.70313	0.02625		6.75	0.05066		6.75	0.0458
6.75	0.02869		6.75	0.05371		6.75	0.0397
6.8125	0.03479		6.8125	0.05554		6.75	0.0397
6.85938	0.03723		6.875	0.05249		6.75	0.0354
6.90625	0.04028		6.9375	0.05066		7	0.0342
6.95313	0.04395		7	0.04639		7	0.0287
7	0.04211		7	0.047		7	0.0238
7.0625	0.03967		7.0625	0.0415		7	0.0238
7.10938	0.03967		7.125	0.03967		7	0.022
7.15625	0.04211		7.1875	0.03967		7.25	0.0214
7.20313	0.04639		7.25	0.04089		7.25	0.0214
7.25	0.04578		7.25	0.04639		7.25	0.0232
7.3125	0.03601		7.3125	0.05066		7.25	0.022
7.35938	0.02808		7.375	0.05432		7.25	0.0232
7.40625	0.01892		7.4375	0.05798		7.5	0.0201
7.45313	0.01038		7.5	0.05981		7.5	0.0214
7.5	0.00366		7.5	0.05554		7.5	0.0183
7.5625	-0.00244		7.5625	0.05432		7.5	0.0134
7.60938	-0.0061		7.625	0.05188		7.5	0.0128
7.65625	-0.00977		7.6875	0.05371		7.75	0.0147
7.70313	-0.0116		7.75	0.05249		7.75	0.0263
7.75	-0.01404		7.75	0.04822		7.75	0.0342
7.8125	-0.01099		7.8125	0.05188		7.75	0.0403
7.85938	-0.00488		7.875	0.05493		7.75	0.0458
7.90625	-0.00183		7.9375	0.05859		8	0.0488
7.95313	-0.00427		8	0.06042		8	0.0525
8	-0.00854		8	0.05676		8	0.0488
8.0625	-0.01465		8.0625	0.05127		8	0.044
8.10938	-0.01587		8.125	0.04028		8	0.036
8.15625	-0.02197		8.1875	0.03052		8.25	0.0299
8.20313	-0.02869		8.25	0.02808		8.25	0.0244
8.25	-0.03845		8.25	0.02563		8.25	0.0195
8.3125	-0.04028		8.3125	0.02441		8.25	0.0183
8.35938	-0.03845		8.375	0.02319		8.25	0.0183
8.40625	-0.03357		8.4375	0.02625		8.5	0.0171
8.45313	-0.02686		8.5	0.02625		8.5	0.0134
8.5	-0.01892		8.5	0.02197		8.5	0.00977
8.5625	-0.01221		8.5625	0.01587		8.5	0.0116
8.60938	-0.00549		8.625	0.00732		8.5	0.0183
8.65625	-0.00305		8.6875	0.00916		8.75	0.0226
8.70313	-0.00366		8.75	0.01038		8.75	0.0214
8.75	0.00244		8.75	0.01343		8.75	0.0183
8.8125	0.00122		8.8125	0.01587		8.75	0.011
8.85938	0.00122		8.875	0.01953		8.75	0.00854
8.90625	0.00061		8.9375	0.02197		9	0.00305
8.95313	0.00122		9	0.0238		9	0
9	-0.00061		9	0.02625		9	-0.00122
9.0625	-0.00366		9.0625	0.0293		9	0
9.10938	-0.00549		9.125	0.03296		9	-0.00061
9.15625	-0.00305		9.1875	0.03174		9.25	-0.00061
9.20313	0.00122		9.25	0.0293		9.25	0.00549
9.25	0.00183		9.25	0.02319		9.25	0.00977
9.3125	0.00305		9.3125	0.01648		9.25	0.0183
9.35938	0.00183		9.375	0.01343		9.25	0.0238
9.40625	0.00061		9.4375	0.0061		9.5	0.0311
9.45313	0.00244		9.5	0.00183		9.5	0.033
9.5	0.00549		9.5	-0.00793		9.5	0.0342
9.5625	0.00671		9.5625	-0.01465		9.5	0.0305
9.60938	0.00671		9.625	-0.01343		9.5	0.0263
9.65625	0.0061		9.6875	-0.01038		9.75	0.0189
9.70313	0.00061		9.75	-0.00427		9.75	0.00854
9.75	0		9.75	0.00244		9.75	0
9.8125	-0.00122		9.8125	0.00916		9.75	-0.0104
9.85938	0.00183		9.875	0.0116		9.75	-0.0159
9.90625	0.00183		9.9375	0.01587		10	-0.0232
9.95313	0.00061		10	0.0116		10	-0.022
10	0.00244		10	0.00977		10	-0.0281
10.0625	0.00488		10.0625	0.00671		10	-0.0317
10.1094	0.01343		10.125	0.0061		10	-0.0348
10.1562	0.01648		10.1875	0.00732		10.25	-0.0293
10.2031	0.01831		10.25	0.00305		10.25	-0.0232
10.25	0.0177		10.25	-0.00183		10.25	-0.0153
10.3125	0.01587		10.3125	-0.00488		10.25	-0.011
10.3594	0.01221		10.375	-0.00183		10.25	-0.00427
10.4062	0.01038		10.4375	-0.00549		10.5	0.00122
10.4531	0.00916		10.5	-0.00183		10.5	0
10.5	0.00305		10.5	-0.00122		10.5	0
10.5625	0		10.5625	0.00183		10.5	-0.00122
10.6094	-0.00488		10.625	0.00244		10.5	0.00183
10.6562	-0.00732		10.6875	0.00305		10.75	0.00366
10.7031	-0.00488		10.75	0.00183		10.75	0.00488
10.75	0.00244		10.75	0.00366		10.75	0.00183
10.8125	0.00549		10.8125	0.00732		10.75	-0.00183
10.8594	0.00732		10.875	0.00916		10.75	-0.00671
10.9062	0.00793		10.9375	0.00671		11	-0.0159
10.9531	0.01709		11	0.00305		11	-0.0232
11	0.02625		11	0.00183		11	-0.0244
11.0625	0.03113		11.0625	0.00061		11	-0.022
11.1094	0.03662		11.125	-0.00122		11	-0.0177
11.1562	0.03906		11.1875	0		11.25	-0.0165
11.2031	0.04272		11.25	-0.00427		11.25	-0.0159
11.25	0.04517		11.25	-0.00427		11.25	-0.0134
11.3125	0.04333		11.3125	-0.01343		11.25	-0.0104
11.3594	0.03967		11.375	-0.0177		11.25	-0.00977
11.4062	0.03784		11.4375	-0.02014		11.5	-0.00977
11.4531	0.03662		11.5	-0.01831		11.5	-0.00732
11.5	0.03418		11.5	-0.01465		11.5	-0.00122
11.5625	0.03784		11.5625	-0.01221		11.5	0
11.6094	0.03906		11.625	-0.01038		11.5	0
11.6562	0.04639		11.6875	-0.00916		11.75	0.00183
11.7031	0.0531		11.75	-0.00305		11.75	0.00244
11.75	0.05615		11.75	-0.00366		11.75	0.014
11.8125	0.06042		11.8125	-0.00122		11.75	0.0226
11.8594	0.06165		11.875	-0.00305		11.75	0.033
11.9062	0.06348		11.9375	-0.00244		12	0.0427
11.9531	0.06287		12	-0.00488		12	0.0537
12	0.0592		12	-0.00305		12	0.058
12.0625	0.05676		12.0625	-0.0061		12	0.0598
12.1094	0.05615		12.125	-0.00122		12	0.0592
12.1562	0.05676		12.1875	0.0061		12.25	0.0568
12.2031	0.05981		12.25	0.00549		12.25	0.0549
12.25	0.06348		12.25	0.00427		12.25	0.0488
12.3125	0.06653		12.3125	0.00061		12.25	0.047
12.3594	0.07202		12.375	0.00183		12.25	0.0452
12.4062	0.07324		12.4375	0.00488		12.5	0.0476
12.4531	0.07141		12.5	0.00671		12.5	0.0464
12.5	0.0708		12.5	0.00854		12.5	0.0458
12.5625	0.07324		12.5625	0.0116		12.5	0.0458
12.6094	0.07263		12.625	0.01831		12.5	0.0494
12.6562	0.07202		12.6875	0.02747		12.75	0.0543
12.7031	0.0708		12.75	0.03174		12.75	0.0537
12.75	0.07202		12.75	0.03296		12.75	0.0537
12.8125	0.07202		12.8125	0.03296		12.75	0.0494
12.8594	0.06836		12.875	0.02808		12.75	0.0549
12.9062	0.06348		12.9375	0.01892		13	0.0598
12.9531	0.06042		13	0.00916		13	0.0653
13	0.0592		13	0.00366		13	0.0702
13.0625	0.0592		13.0625	0.00366		13	0.0732
13.1094	0.05737		13.125	0.00427		13	0.0732
13.1562	0.05371		13.1875	0.00488		13.25	0.072
13.2031	0.05005		13.25	0.00732		13.25	0.072
13.25	0.04272		13.25	0.01099		13.25	0.0739
13.3125	0.03418		13.3125	0.01465		13.25	0.0824
13.3594	0.02441		13.375	0.01831		13.25	0.0818
13.4062	0.01648		13.4375	0.02563		13.5	0.0818
13.4531	0.01526		13.5	0.03296		13.5	0.0763
13.5	0.01282		13.5	0.04395		13.5	0.0702
13.5625	0.01404		13.5625	0.04761		13.5	0.0598
13.6094	0.01831		13.625	0.05188		13.5	0.0519
13.6562	0.01892		13.6875	0.05249		13.75	0.0458
13.7031	0.01587		13.75	0.05554		13.75	0.0446
13.75	0.01038		13.75	0.05493		13.75	0.0488
13.8125	0.00244		13.8125	0.05188		13.75	0.0446
13.8594	-0.00427		13.875	0.04578		13.75	0.044
13.9062	-0.00854		13.9375	0.04028		14	0.0372
13.9531	-0.01648		14	0.0354		14	0.0342
14	-0.01831		14	0.02991		14	0.0336
14.0625	-0.01953		14.0625	0.03479		14	0.0324
14.1094	-0.01648		14.125	0.03967		14	0.0348
14.1562	-0.01221		14.1875	0.05127		14.25	0.0354
14.2031	-0.01465		14.25	0.05859		14.25	0.0378
14.25	-0.01892		14.25	0.0708		14.25	0.0324
14.3125	-0.02502		14.3125	0.0769		14.25	0.0293
14.3594	-0.02563		14.375	0.07813		14.25	0.025
14.4062	-0.03113		14.4375	0.07446		14.5	0.0281
14.4531	-0.03113		14.5	0.06592		14.5	0.0287
14.5	-0.03418		14.5	0.05859		14.5	0.0287
14.5625	-0.0354		14.5625	0.04944		14.5	0.0269
14.6094	-0.03784		14.625	0.04883		14.5	0.0226
14.6562	-0.04395		14.6875	0.04761		14.75	0.0208
14.7031	-0.04944		14.75	0.04944		14.75	0.00977
14.75	-0.05676		14.75	0.05432		14.75	0
14.8125	-0.0592		14.8125	0.06287		14.75	-0.0116
14.8594	-0.06531		14.875	0.06958		14.75	-0.0171
14.9062	-0.06653		14.9375	0.0708		15	-0.0256
14.9531	-0.06836		15	0.07019		15	-0.0299
15	-0.06226		15	0.06226		15	-0.0336
15.0625	-0.05859		15.0625	0.05554		15	-0.0348
15.1094	-0.0531		15.125	0.04211		15	-0.0299
15.1562	-0.0531		15.1875	0.03845		15.25	-0.0299
15.2031	-0.05371		15.25	0.03113		15.25	-0.0275
15.25	-0.05371		15.25	0.02869		15.25	-0.0281
15.3125	-0.06226		15.3125	0.02686		15.25	-0.0299
15.3594	-0.06958		15.375	0.02258		15.25	-0.0324
15.4062	-0.07568		15.4375	0.01892		15.5	-0.0342
15.4531	-0.07935		15.5	0.01404		15.5	-0.0336
15.5	-0.08179		15.5	0.01404		15.5	-0.0342
15.5625	-0.07935		15.5625	0.00488		15.5	-0.0348
15.6094	-0.07874		15.625	0.00488		15.5	-0.0427
15.6562	-0.07263		15.6875	0		15.75	-0.0464
15.7031	-0.06958		15.75	-0.00122		15.75	-0.0488
15.75	-0.07019		15.75	-0.00854		15.75	-0.0476
15.8125	-0.07141		15.8125	-0.0177		15.75	-0.0494
15.8594	-0.07019		15.875	-0.02136		15.75	-0.0543
15.9062	-0.06714		15.9375	-0.02686		16	-0.0568
15.9531	-0.06775		16	-0.0293		16	-0.0568
16	-0.07263		16	-0.03296		16	-0.0543
16.0625	-0.07446		16.0625	-0.03418		16	-0.0568
16.1094	-0.06958		16.125	-0.03052		16	-0.0617
16.1562	-0.06042		16.1875	-0.02258		16.25	-0.0665
16.2031	-0.05737		16.25	-0.01892		16.25	-0.0665
16.25	-0.05615		16.25	-0.01709		16.25	-0.0629
16.3125	-0.05554		16.3125	-0.02014		16.25	-0.0592
16.3594	-0.05737		16.375	-0.02563		16.25	-0.0537
16.4062	-0.05676		16.4375	-0.0238		16.5	-0.0519
16.4531	-0.0592		16.5	-0.0293		16.5	-0.0488
16.5	-0.05798		16.5	-0.03357		16.5	-0.0507
16.5625	-0.05432		16.5625	-0.0415		16.5	-0.0531
16.6094	-0.04761		16.625	-0.04578		16.5	-0.0562
16.6562	-0.04456		16.6875	-0.05188		16.75	-0.0562
16.7031	-0.03906		16.75	-0.05371		16.75	-0.0604
16.75	-0.0354		16.75	-0.05432		16.75	-0.0629
16.8125	-0.02563		16.8125	-0.05676		16.75	-0.0617
16.8594	-0.02258		16.875	-0.05798		16.75	-0.0653
16.9062	-0.01709		16.9375	-0.06226		17	-0.0653
16.9531	-0.01526		17	-0.06226		17	-0.069
17	-0.01709		17	-0.06226		17	-0.0702
17.0625	-0.01587		17.0625	-0.05859		17	-0.0647
17.1094	-0.02136		17.125	-0.05737		17	-0.0568
17.1562	-0.02563		17.1875	-0.05859		17.25	-0.0488
17.2031	-0.02808		17.25	-0.06409		17.25	-0.0421
17.25	-0.0238		17.25	-0.06531		17.25	-0.0403
17.3125	-0.02502		17.3125	-0.06348		17.25	-0.0427
17.3594	-0.02319		17.375	-0.06226		17.25	-0.044
17.4062	-0.02808		17.4375	-0.05798		17.5	-0.0433
17.4531	-0.02991		17.5	-0.06042		17.5	-0.0391
17.5	-0.03113		17.5	-0.05859		17.5	-0.0378
17.5625	-0.03357		17.5625	-0.06165		17.5	-0.0378
17.6094	-0.03601		17.625	-0.0647		17.5	-0.0378
17.6562	-0.03723		17.6875	-0.06958		17.75	-0.0385
17.7031	-0.03418		17.75	-0.07874		17.75	-0.0336
17.75	-0.0293		17.75	-0.08301		17.75	-0.0311
17.8125	-0.02563		17.8125	-0.08606		17.75	-0.0232
17.8594	-0.02563		17.875	-0.08118		17.75	-0.0232
17.9062	-0.02747		17.9375	-0.07385		18	-0.0256
17.9531	-0.02991		18	-0.06348		18	-0.0269
18	-0.03296		18	-0.06531		18	-0.0232
18.0625	-0.02991		18.0625	-0.06775		18	-0.022
18.1094	-0.02808		18.125	-0.06897		18	-0.025
18.1562	-0.02075		18.1875	-0.06775		18.25	-0.0263
18.2031	-0.02014		18.25	-0.05981		18.25	-0.0275
18.25	-0.01953		18.25	-0.05615		18.25	-0.0263
18.3125	-0.01892		18.3125	-0.04944		18.25	-0.0256
18.3594	-0.0116		18.375	-0.04883		18.25	-0.0256
18.4062	-0.00732		18.4375	-0.04883		18.5	-0.0263
18.4531	-0.00183		18.5	-0.05798		18.5	-0.0244
18.5	-0.00122		18.5	-0.0647		18.5	-0.0281
18.5625	0.00061		18.5625	-0.06592		18.5	-0.0293
18.6094	0.00183		18.625	-0.06287		18.5	-0.0287
18.6562	-0.00122		18.6875	-0.05737		18.75	-0.0324
18.7031	-0.00549		18.75	-0.05615		18.75	-0.033
18.75	-0.00977		18.75	-0.04944		18.75	-0.0378
18.8125	-0.01404		18.8125	-0.04333		18.75	-0.0372
18.8594	-0.01709		18.875	-0.03235		18.75	-0.0336
18.9062	-0.02075		18.9375	-0.02502		19	-0.0293
18.9531	-0.02258		19	-0.02197		19	-0.0299
19	-0.02441		19	-0.02625		19	-0.0305
19.0625	-0.01953		19.0625	-0.03052		19	-0.0336
19.1094	-0.02014		19.125	-0.03418		19	-0.0342
19.1562	-0.01587		19.1875	-0.03418		19.25	-0.036
19.2031	-0.01587		19.25	-0.02563		19.25	-0.036
19.25	-0.01404		19.25	-0.01831		19.25	-0.0311
19.3125	-0.01404		19.3125	-0.00549		19.25	-0.0238
19.3594	-0.0177		19.375	-0.00732		19.25	-0.0122
19.4062	-0.02319		19.4375	-0.00916		19.5	-0.00793
19.4531	-0.0238		19.5	-0.0116		19.5	-0.00671
19.5	-0.02136		19.5	-0.01221		19.5	-0.00916
19.5625	-0.01892		19.5625	-0.01221		19.5	-0.00732
19.6094	-0.01465		19.625	-0.01343		19.5	-0.00916
19.6562	-0.01343		19.6875	-0.01648		19.75	-0.00732
19.7031	-0.00488		19.75	-0.01892		19.75	-0.00671
19.75	0		19.75	-0.01953		19.75	-0.0061
19.8125	0.0061		19.8125	-0.02625		19.75	-0.00793
19.8594	0.00916		19.875	-0.02869		19.75	-0.00916
19.9062	0.0116		19.9375	-0.03113		20	-0.0122
19.9531	0.01526		20	-0.02686		20	-0.0104
20	0.01465		20	-0.02319		20	-0.00977
20.0625	0.01221		20.0625	-0.01587		20	-0.011
20.1094	0.01465		20.125	-0.00977		20	-0.0116
20.1562	0.01099		20.1875	-0.00244		20.25	-0.0122
20.2031	0.01038		20.25	0.00061		20.25	-0.011
20.25	0.00916		20.25	-0.00366		20.25	-0.00427
20.3125	0.0116		20.3125	-0.00793		20.25	-0.00854
20.3594	0.00854		20.375	-0.01221		20.25	-0.00732
20.4062	0.00854		20.4375	-0.01282		20.5	-0.00977
20.4531	0.00305		20.5	-0.01282		20.5	-0.00916
20.5	0		20.5	-0.01831		20.5	-0.0104
20.5625	-0.00366		20.5625	-0.01892		20.5	-0.0122
20.6094	-0.00793		20.625	-0.02197		20.5	-0.0134
20.6562	-0.00916		20.6875	-0.0238		20.75	-0.014
20.7031	-0.01465		20.75	-0.03052		20.75	-0.014
20.75	-0.01953		20.75	-0.03418		20.75	-0.0153
20.8125	-0.02258		20.8125	-0.03479		20.75	-0.0153
20.8594	-0.02563		20.875	-0.02563		20.75	-0.0128
20.9062	-0.0293		20.9375	-0.01709		21	-0.00671
20.9531	-0.02991		21	-0.00793		21	-0.00305
21	-0.02869		21	-0.00122		21	-0.00183
21.0625	-0.02686		21.0625	0		21	-0.0061
21.1094	-0.02502		21.125	0.00122		21	-0.00977
21.1562	-0.02686		21.1875	-0.00427		21.25	-0.0122
21.2031	-0.02869		21.25	-0.00916		21.25	-0.0147
21.25	-0.03601		21.25	-0.0116		21.25	-0.0159
21.3125	-0.04272		21.3125	-0.01282		21.25	-0.0165
21.3594	-0.05066		21.375	-0.01404		21.25	-0.0177
21.4062	-0.05615		21.4375	-0.01038		21.5	-0.0201
21.4531	-0.06226		21.5	-0.00671		21.5	-0.0226
21.5	-0.06287		21.5	-0.0061		21.5	-0.022
21.5625	-0.06897		21.5625	-0.00305		21.5	-0.0244
21.6094	-0.07446		21.625	-0.00732		21.5	-0.0238
21.6562	-0.07751		21.6875	-0.00977		21.75	-0.0348
21.7031	-0.07996		21.75	-0.00793		21.75	-0.0446
21.75	-0.0769		21.75	-0.00488		21.75	-0.0531
21.8125	-0.07629		21.8125	0.00061		21.75	-0.0507
21.8594	-0.07202		21.875	0.00061		21.75	-0.0501
21.9062	-0.06592		21.9375	-0.00183		22	-0.0464
21.9531	-0.05859		22	-0.01038		22	-0.0494
22	-0.0592		22	-0.01648		22	-0.0531
22.0625	-0.06226		22.0625	-0.0293		22	-0.0513
22.1094	-0.06897		22.125	-0.0354		22	-0.0513
22.1562	-0.0708		22.1875	-0.03906		22.25	-0.0476
22.2031	-0.06836		22.25	-0.03601		22.25	-0.047
22.25	-0.06653		22.25	-0.03601		22.25	-0.0433
22.3125	-0.06592		22.3125	-0.03601		22.25	-0.0452
22.3594	-0.06531		22.375	-0.03662		22.25	-0.0427
22.4062	-0.06653		22.4375	-0.03784		22.5	-0.0458
22.4531	-0.06775		22.5	-0.03967		22.5	-0.0446
22.5	-0.06775		22.5	-0.04211		22.5	-0.047
22.5625	-0.06958		22.5625	-0.03845		22.5	-0.0519
22.6094	-0.07324		22.625	-0.03418		22.5	-0.058
22.6562	-0.07874		22.6875	-0.02563		22.75	-0.0641
22.7031	-0.08606		22.75	-0.02502		22.75	-0.0678
22.75	-0.08728		22.75	-0.02441		22.75	-0.072
22.8125	-0.08423		22.8125	-0.02502		22.75	-0.0757
22.8594	-0.07141		22.875	-0.02502		22.75	-0.0787
22.9062	-0.06836		22.9375	-0.02808		23	-0.0757
22.9531	-0.06714		23	-0.03235		23	-0.0751
23	-0.06714		23	-0.03845		23	-0.0714
23.0625	-0.0647		23.0625	-0.03784		23	-0.0702
23.1094	-0.06348		23.125	-0.03235		23	-0.0671
23.1562	-0.06042		23.1875	-0.03052		23.25	-0.0641
23.2031	-0.06348		23.25	-0.02991		23.25	-0.0665
23.25	-0.06348		23.25	-0.03601		23.25	-0.069
23.3125	-0.05798		23.3125	-0.047		23.25	-0.0678
23.3594	-0.05432		23.375	-0.05432		23.25	-0.0659
23.4062	-0.05249		23.4375	-0.06226		23.5	-0.0653
23.4531	-0.05127		23.5	-0.06531		23.5	-0.0665
23.5	-0.05432		23.5	-0.0647		23.5	-0.072
23.5625	-0.05493		23.5625	-0.06409		23.5	-0.0726
23.6094	-0.05615		23.625	-0.06897		23.5	-0.0678
23.6562	-0.05432		23.6875	-0.07507		23.75	-0.0678
23.7031	-0.04517		23.75	-0.07935		23.75	-0.0665
23.75	-0.02869		23.75	-0.07935		23.75	-0.0629
23.8125	-0.01709		23.8125	-0.07507		23.75	-0.0641
23.8594	-0.00244		23.875	-0.07813		23.75	-0.061
23.9062	0.00366		23.9375	-0.07874		24	-0.0629
23.9531	0.00854		24	-0.08606		24	-0.0617
24	0.00977		24	-0.08728		24	-0.0598
24.0625	0.00793		24.0625	-0.09094		24	-0.0507
24.1094	0.00732		24.125	-0.09277		24	-0.0458
24.1562	0.01282		24.1875	-0.09033		24.25	-0.0421
24.2031	0.02014		24.25	-0.08667		24.25	-0.0446
24.25	0.02258		24.25	-0.08423		24.25	-0.047
24.3125	0.02136		24.3125	-0.07996		24.25	-0.0464
24.3594	0.01953		24.375	-0.07202		24.25	-0.0464
24.4062	0.02136		24.4375	-0.06531		24.5	-0.0446
24.4531	0.02869		24.5	-0.05615		24.5	-0.0427
24.5	0.03784		24.5	-0.05493		24.5	-0.036
24.5625	0.04761		24.5625	-0.05127		24.5	-0.0317
24.6094	0.05432		24.625	-0.04944		24.5	-0.0232
24.6562	0.06165		24.6875	-0.04639		24.75	-0.0159
24.7031	0.06348		24.75	-0.04761		24.75	-0.00732
24.75	0.06226		24.75	-0.04089		24.75	-0.00183
24.8125	0.06226		24.8125	-0.0354		24.75	0.00122
24.8594	0.06226		24.875	-0.02869		24.75	0.0061
24.9062	0.05981		24.9375	-0.0238		25	0.00793
24.9531	0.06104		25	-0.02441		25	0.0183
25	0.0647		25	-0.02136		25	0.0208
25.0625	0.06653		25.0625	-0.01892		25	0.0244
25.1094	0.07568		25.125	-0.01709		25	0.0281
25.1562	0.07751		25.1875	-0.02014		25.25	0.033
25.2031	0.07935		25.25	-0.02502		25.25	0.0324
25.25	0.07874		25.25	-0.0293		25.25	0.0366
25.3125	0.07507		25.3125	-0.02869		25.25	0.0372
25.3594	0.06714		25.375	-0.02563		25.25	0.0421
25.4062	0.0592		25.4375	-0.02136		25.5	0.0494
25.4531	0.0531		25.5	-0.01892		25.5	0.0488
25.5	0.0531		25.5	-0.02014		25.5	0.0476
25.5625	0.0592		25.5625	-0.01953		25.5	0.0385
25.6094	0.05798		25.625	-0.02075		25.5	0.0342
25.6562	0.0592		25.6875	-0.01953		25.75	0.0269
25.7031	0.05371		25.75	-0.01526		25.75	0.0263
25.75	0.0531		25.75	-0.00916		25.75	0.0256
25.8125	0.04883		25.8125	-0.00366		25.75	0.0269
25.8594	0.04822		25.875	0.00244		25.75	0.0281
25.9062	0.04272		25.9375	0.00854		26	0.0311
25.9531	0.03784		26	0.0177		26	0.0366
26	0.03357		26	0.02258		26	0.0378
26.0625	0.02625		26.0625	0.02319		26	0.0403
26.1094	0.02136		26.125	0.01953		26	0.0397
26.1562	0.0177		26.1875	0.01587		26.25	0.0391
26.2031	0.02075		26.25	0.01343		26.25	0.0372
26.25	0.01953		26.25	0.01587		26.25	0.0342
26.3125	0.02075		26.3125	0.01587		26.25	0.0324
26.3594	0.01526		26.375	0.01892		26.25	0.0324
26.4062	0.01343		26.4375	0.02625		26.5	0.0372
26.4531	0.01404		26.5	0.03479		26.5	0.0415
26.5	0.01587		26.5	0.04272		26.5	0.0501
26.5625	0.0195		26.5625	0.04883		26.5	0.0555
26.6094	0.02014		26.625	0.05066		26.5	0.0568
26.6562	0.02441		26.6875	0.05066		26.75	0.0531
26.7031	0.01892		26.75	0.05615		26.75	0.047
26.75	0.01709		26.75	0.05615		26.75	0.0452
26.8125	0.01282		26.8125	0.05432		26.75	0.0403
26.8594	0.0116		26.875	0.05005		26.75	0.036
26.9062	0.00977		26.9375	0.04639		27	0.033
26.9531	0.00671		27	0.04517		27	0.0336
27	0.00488		27	0.04272		27	0.0311
27.0625	0.00305		27.0625	0.04211		27	0.0293
27.1094	0.00366		27.125	0.04517		27	0.0299
27.1562	0.00488		27.1875	0.04883		27.25	0.0317
27.2031	0.01221		27.25	0.04944		27.25	0.0372
27.25	0.01953		27.25	0.04822		27.25	0.0378
27.3125	0.02991		27.3125	0.04761		27.25	0.0391
27.3594	0.03723		27.375	0.05066		27.25	0.0378
27.4062	0.04089		27.4375	0.05127		27.5	0.0372
27.4531	0.0415		27.5	0.04333		27.5	0.0366
27.5	0.03784		27.5	0.03479		27.5	0.0299
27.5625	0.03662		27.5625	0.02625		27.5	0.0281
27.6094	0.02625		27.625	0.02502		27.5	0.0287
27.6562	0.02197		27.6875	0.02991		27.75	0.0311
27.7031	0.01709		27.75	0.03784		27.75	0.0354
27.75	0.0177		27.75	0.047		27.75	0.0342
27.8125	0.01709		27.8125	0.05127		27.75	0.0324
27.8594	0.01831		27.875	0.05066		27.75	0.0287
27.9062	0.01953		27.9375	0.04578		28	0.0208
27.9531	0.01648		28	0.04028		28	0.0171
28	0.01465		28	0.03906		28	0.0128
28.0625	0.00916		28.0625	0.04089		28	0.014
28.1094	0.00854		28.125	0.04272		28	0.0128
28.1562	0.00854		28.1875	0.04028		28.25	0.011
28.2031	0.00732		28.25	0.03784		28.25	0.00916
28.25	0.00305		28.25	0.03784		28.25	0.00916
28.3125	-0.00061		28.3125	0.03052		28.25	0.0171
28.3594	-0.00305		28.375	0.02563		28.25	0.0183
28.4062	-0.00549		28.4375	0.01953		28.5	0.0208
28.4531	-0.01038		28.5	0.02014		28.5	0.0195
28.5	-0.01282		28.5	0.0238		28.5	0.0171
28.5625	-0.0116		28.5625	0.02625		28.5	0.0134
28.6094	-0.00671		28.625	0.02686		28.5	0.00854
28.6562	-0.00183		28.6875	0.02625		28.75	0.00244
28.7031	0.00732		28.75	0.02319		28.75	0.00122
28.75	0.01221		28.75	0.01221		28.75	0.00671
28.8125	0.01709		28.8125	0.00244		28.75	0.0061
28.8594	0.01831		28.875	-0.00854		28.75	0.00977
28.9062	0.01709		28.9375	-0.00916		29	0.00427
28.9531	0.01099		29	-0.00488		29	0.00427
29	0.00366		29	0.00244		29	0.00549
29.0625	-0.00549		29.0625	0.0116		29	0.00793
29.1094	-0.01282		29.125	0.01221		29	0.00977
29.1562	-0.01831		29.1875	0.02197		29.25	0.00854
29.2031	-0.02014		29.25	0.02625		29.25	0.0061
29.25	-0.02197		29.25	0.03296		29.25	-0.00305
29.3125	-0.02258		29.3125	0.03906		29.25	-0.00916
29.3594	-0.02136		29.375	0.04272		29.25	-0.0128
29.4062	-0.02014		29.4375	0.04395		29.5	-0.0122
29.4531	-0.02014		29.5	0.03723		29.5	-0.0153
29.5	-0.01831		29.5	0.02808		29.5	-0.0165
29.5625	-0.01831		29.5625	0.01892		29.5	-0.0201
29.6094	-0.02136		29.625	0.0177		29.5	-0.0183
29.6562	-0.02502		29.6875	0.01221		29.75	-0.0134
29.7031	-0.0238		29.75	0.00732		29.75	-0.00977
29.75	-0.02319		29.75	0		29.75	-0.00977
29.8125	-0.01221		29.8125	-0.00549		29.75	-0.0104
29.8594	-0.00916		29.875	-0.00793		29.75	-0.00916
29.9062	-0.00427		29.9375	-0.01038		30	-0.0122
29.9531	0.00061		30	-0.01099		30	-0.011
30	0.00671		30	-0.01038		30	-0.0134
30.0625	0.00549		30.0625	-0.00427		30	-0.0147
30.1094	0.00488		30.125	-0.01038		30	-0.0116
30.1562	-0.00427		30.1875	-0.01221		30.25	-0.0128
30.2031	-0.00916		30.25	-0.01953		30.25	-0.0122
30.25	-0.01221		30.25	-0.02014		30.25	-0.00549
30.3125	-0.01526		30.3125	-0.01892		30.25	0.00061
30.3594	-0.01404		30.375	-0.0177		30.25	0.00427
30.4062	-0.01221		30.4375	-0.01404		30.5	0.00061
30.4531	-0.01038		30.5	-0.00977		30.5	-0.00305
30.5	-0.00488		30.5	-0.00305		30.5	-0.00671
30.5625	-0.00061		30.5625	0		30.5	-0.00427
30.6094	0.00671		30.625	0.00305		30.5	-0.0061
30.6562	0.00977		30.6875	0.00732		30.75	-0.0061
30.7031	0.01282		30.75	0.01587		30.75	-0.00671
30.75	0.01099		30.75	0.01648		30.75	-0.00671
30.8125	0.0116		30.8125	0.01831		30.75	-0.011
30.8594	0.0116		30.875	0.01526		30.75	-0.0134
30.9062	0.01831		30.9375	0.01099		31	-0.0183
30.9531	0.02014		31	0.0061		31	-0.0195
31	0.01831		31	0		31	-0.0165
31.0625	0.01526		31.0625	-0.00549		31	-0.011
31.1094	0.01709		31.125	-0.00671		31	-0.00244
31.1562	0.01892		31.1875	-0.00793		31.25	0.00366
31.2031	0.01953		31.25	-0.00977		31.25	0.0116
31.25	0.0116		31.25	-0.00916		31.25	0.0134
31.3125	0.0061		31.3125	-0.0061		31.25	0.0159
31.3594	0.00854		31.375	-0.00671		31.25	0.0177
31.4062	0.00977		31.4375	-0.00244		31.5	0.0201
31.4531	0.01709		31.5	-0.00671		31.5	0.022
31.5	0.02441		31.5	-0.00793		31.5	0.0226
31.5625	0.03296		31.5625	-0.00793		31.5	0.0189
31.6094	0.03906		31.625	-0.00488		31.5	0.0189
31.6562	0.03723		31.6875	-0.00244		31.75	0.0201
31.7031	0.03235		31.75	0.00305		31.75	0.0189
31.75	0.03052		31.75	0.00549		31.75	0.0201
31.8125	0.03113		31.8125	0.0116		31.75	0.0256
31.8594	0.0354		31.875	0.01282		31.75	0.0293
31.9062	0.04272		31.9375	0.01099		32	0.0342
31.9531	0.04944		32	0.01099		32	0.0281
32	0.05554		32	0.00732		32	0.0238
32.0625	0.05981		32.0625	0.00854		32	0.0208
32.1094	0.0592		32.125	0.00732		32	0.0244
32.1562	0.05859		32.1875	0.00549		32.25	0.0263
32.2031	0.05432		32.25	0.00061		32.25	0.0275
32.25	0.0531		32.25	-0.00427		32.25	0.0263
32.3125	0.047		32.3125	-0.01221		32.25	0.0256
32.3594	0.04211		32.375	-0.01404		32.25	0.0299
32.4062	0.03784		32.4375	-0.01526		32.5	0.0287
32.4531	0.03967		32.5	-0.01343		32.5	0.0324
32.5	0.04456		32.5	-0.00977		32.5	0.0354
32.5625	0.05371		32.5625	-0.00183		32.5	0.0348
32.6094	0.06104		32.625	0.00549		32.5	0.0311
32.6562	0.06592		32.6875	0.01587		32.75	0.0299
32.7031	0.07141		32.75	0.02014		32.75	0.033
32.75	0.06775		32.75	0.01831		32.75	0.0372
32.8125	0.06714		32.8125	0.0116		32.75	0.0433
32.8594	0.06653		32.875	0.00427		32.75	0.0458
32.9062	0.06653		32.9375	0		33	0.0507
32.9531	0.06104		33	-0.00061		33	0.0531
33	0.05493		33	0.00183		33	0.0647
33.0625	0.04761		33.0625	0.01099		33	0.0678
33.1094	0.04456		33.125	0.02747		33	0.0696
33.1562	0.04517		33.1875	0.03967		33.25	0.0684
33.2031	0.0415		33.25	0.05432		33.25	0.0684
33.25	0.03845		33.25	0.05554		33.25	0.0671
33.3125	0.03601		33.3125	0.0531		33.25	0.0665
33.3594	0.03174		33.375	0.04761		33.25	0.0659
33.4062	0.03052		33.4375	0.04578		33.5	0.0659
33.4531	0.0238		33.5	0.0415		33.5	0.0696
33.5	0.01526		33.5	0.0415		33.5	0.0653
33.5625	0.00854		33.5625	0.03906		33.5	0.0659
33.6094	0.00488		33.625	0.03967		33.5	0.0641
33.6562	-0.00122		33.6875	0.03906		33.75	0.0629
33.7031	-0.0061		33.75	0.03784		33.75	0.0592
33.75	-0.00732		33.75	0.0415		33.75	0.0568
33.8125	-0.00366		33.8125	0.047		33.75	0.0562
33.8594	0.00183		33.875	0.05554		33.75	0.0531
33.9062	0.00061		33.9375	0.05798		34	0.0488
33.9531	-0.00366		34	0.06042		34	0.0385
34	-0.01465		34	0.06042		34	0.0281
34.0625	-0.0238		34.0625	0.06653		34	0.0153
34.1094	-0.03662		34.125	0.06531		34	0.00916
34.1562	-0.047		34.1875	0.06348		34.25	0.0061
34.2031	-0.05066		34.25	0.06104		34.25	-0.00061
34.25	-0.05188		34.25	0.06042		34.25	-0.00183
34.3125	-0.0531		34.3125	0.06714		34.25	-0.00183
34.3594	-0.05859		34.375	0.06775		34.25	-0.00122
34.4062	-0.0592		34.4375	0.06775		34.5	-0.00061
34.4531	-0.06104		34.5	0.06348		34.5	-0.00122
34.5	-0.05432		34.5	0.06226		34.5	0
34.5625	-0.05493		34.5625	0.0592		34.5	0.00305
34.6094	-0.05615		34.625	0.06104		34.5	0.00549
34.6562	-0.05859		34.6875	0.06165		34.75	0.00427
34.7031	-0.05981		34.75	0.06287		34.75	0.00488
34.75	-0.06287		34.75	0.06592		34.75	0.00061
34.8125	-0.06348		34.8125	0.0647		34.75	-0.00061
34.8594	-0.06287		34.875	0.06531		34.75	-0.00732
34.9062	-0.06348		34.9375	0.06226		35	-0.0171
34.9531	-0.06226		35	0.05615		35	-0.0238
35	-0.06775		35	0.047		35	-0.033
35.0625	-0.07019		35.0625	0.04089		35	-0.0397
35.1094	-0.0726		35.125	0.03296		35	-0.0415
35.1562	-0.0708		35.1875	0.03235		35.25	-0.0403
35.2031	-0.07202		35.25	0.03113		35.25	-0.0403
35.25	-0.07568		35.25	0.02563		35.25	-0.0354
35.3125	-0.0824		35.3125	0.01831		35.25	-0.0409
35.3594	-0.08423		35.375	0.01099		35.25	-0.0488
35.4062	-0.08362		35.4375	0.01038		35.5	-0.0562
35.4531	-0.08301		35.5	0.00854		35.5	-0.0617
35.5	-0.07568		35.5	0.00977		35.5	-0.0641
35.5625	-0.06714		35.5625	0.0116		35.5	-0.0708
35.6094	-0.05676		35.625	0.01587		35.5	-0.0726
35.6562	-0.05493		35.6875	0.01648		35.75	-0.0757
35.7031	-0.05554		35.75	0.00916		35.75	-0.0757
35.75	-0.05676		35.75	-0.00427		35.75	-0.0751
35.8125	-0.05371		35.8125	-0.01343		35.75	-0.072
35.8594	-0.05249		35.875	-0.01709		35.75	-0.0696
35.9062	-0.05066		35.9375	-0.02075		36	-0.0678
35.9531	-0.0531		36	-0.02441		36	-0.0653
36	-0.05249		36	-0.02991		36	-0.0647
36.0625	-0.05005		36.0625	-0.03601		36	-0.0604
36.1094	-0.04883		36.125	-0.03906		36	-0.0574
36.1562	-0.047		36.1875	-0.04395		36.25	-0.0555
36.2031	-0.04272		36.25	-0.04944		36.25	-0.0562
36.25	-0.03845		36.25	-0.05432		36.25	-0.0574
36.3125	-0.03296		36.3125	-0.05615		36.25	-0.0598
36.3594	-0.02991		36.375	-0.06165		36.25	-0.0604
36.4062	-0.03113		36.4375	-0.06226		36.5	-0.0617
36.4531	-0.03296		36.5	-0.0647		36.5	-0.0635
36.5	-0.03723		36.5	-0.06531		36.5	-0.0598
36.5625	-0.04456		36.5625	-0.06226		36.5	-0.0568
36.6094	-0.05066		36.625	-0.06226		36.5	-0.0543
36.6562	-0.0531		36.6875	-0.05737		36.75	-0.0543
36.7031	-0.0531		36.75	-0.05493		36.75	-0.0568
36.75	-0.05005		36.75	-0.05371		36.75	-0.0549
36.8125	-0.05127		36.8125	-0.05798		36.75	-0.0549
36.8594	-0.04883		36.875	-0.06409		36.75	-0.0604
36.9062	-0.04822		36.9375	-0.06836		37	-0.0653
36.9531	-0.04578		37	-0.0647		37	-0.0726
37	-0.04272		37	-0.05676		37	-0.0745
37.0625	-0.04211		37.0625	-0.05249		37	-0.0726
37.1094	-0.04639		37.125	-0.05188		37	-0.0678
37.1562	-0.05005		37.1875	-0.05737		37.25	-0.0617
37.2031	-0.05188		37.25	-0.06165		37.25	-0.0531
37.25	-0.05066		37.25	-0.07019		37.25	-0.044
37.3125	-0.04578		37.3125	-0.07324		37.25	-0.0378
37.3594	-0.04211		37.375	-0.07141		37.25	-0.0354
37.4062	-0.03113		37.4375	-0.0647		37.5	-0.0348
37.4531	-0.02197		37.5	-0.05676		37.5	-0.0324
37.5	-0.01221		37.5	-0.05005		37.5	-0.0342
37.5625	-0.00977		37.5625	-0.047		37.5	-0.0336
37.6094	-0.01587		37.625	-0.04517		37.5	-0.0348
37.6562	-0.02563		37.6875	-0.04089		37.75	-0.0324
37.7031	-0.0354		37.75	-0.04578		37.75	-0.0293
37.75	-0.03967		37.75	-0.05127		37.75	-0.0324
37.8125	-0.04028		37.8125	-0.06104		37.75	-0.0354
37.8594	-0.03906		37.875	-0.06653		37.75	-0.0378
37.9062	-0.03967		37.9375	-0.06592		38	-0.0366
37.9531	-0.04395		38	-0.0647		38	-0.0366
38	-0.04822		38	-0.06348		38	-0.0342
38.0625	-0.05615		38.0625	-0.05859		38	-0.033
38.1094	-0.0592		38.125	-0.04944		38	-0.0311
38.1562	-0.06165		38.1875	-0.04578		38.25	-0.025
38.2031	-0.05554		38.25	-0.04089		38.25	-0.0232
38.25	-0.04822		38.25	-0.03967		38.25	-0.0238
38.3125	-0.03296		38.3125	-0.03601		38.25	-0.0263
38.3594	-0.02747		38.375	-0.0354		38.25	-0.0281
38.4062	-0.02014		38.4375	-0.03967		38.5	-0.033
38.4531	-0.01953		38.5	-0.04272		38.5	-0.0317
38.5	-0.01587		38.5	-0.04517		38.5	-0.0299
38.5625	-0.0116		38.5625	-0.047		38.5	-0.0214
38.6094	-0.00916		38.625	-0.05005		38.5	-0.0128
38.6562	-0.00854		38.6875	-0.05066		38.75	-0.011
38.7031	-0.00671		38.75	-0.05188		38.75	-0.011
38.75	-0.00427		38.75	-0.04395		38.75	-0.0134
38.8125	-0.00061		38.8125	-0.04211		38.75	-0.0159
38.8594	0.00061		38.875	-0.03906		38.75	-0.0171
38.9062	0.00183		38.9375	-0.03479		39	-0.0201
38.9531	0.00488		39	-0.02991		39	-0.0226
39	0.00366		39	-0.02319		39	-0.0238
39.0625	0.00427		39.0625	-0.0238		39	-0.0226
39.1094	0.00244		39.125	-0.02441		39	-0.0232
39.1562	0.00061		39.1875	-0.02502		39.25	-0.025
39.2031	0.00122		39.25	-0.02197		39.25	-0.0269
39.25	0.00244		39.25	-0.02197		39.25	-0.0238
39.3125	0.00244		39.3125	-0.01892		39.25	-0.0189
39.3594	0.00244		39.375	-0.02014		39.25	-0.0159
39.4062	0.00244		39.4375	-0.01648		39.5	-0.0116
39.4531	-0.00305		39.5	-0.00916		39.5	-0.0122
39.5	-0.0061		39.5	-0.00916		39.5	-0.00305
39.5625	-0.00854		39.5625	-0.01038		39.5	0.00244
39.6094	-0.01099		39.625	-0.01221		39.5	0.00916
39.6562	-0.00977		39.6875	-0.0116		39.75	0.00854
39.7031	-0.01526		39.75	-0.01587		39.75	0.00854
39.75	-0.01465		39.75	-0.01953		39.75	0.00244
39.8125	-0.01587		39.8125	-0.02747		39.75	-0.00061
39.8594	-0.01465		39.875	-0.03174		39.75	0.00061
39.9062	-0.01343		39.9375	-0.02808		40	0
39.9531	-0.00671		40	-0.02808		40	0.00244
40	-0.00427		40	-0.02136		40	-0.00244
40.0625	0.00305		40.0625	-0.01587		40	-0.00916
40.1094	0.00488		40.125	-0.0177		40	-0.0104
40.1562	0.00427		40.1875	-0.02075		40.25	-0.00854
40.2031	0.00183		40.25	-0.03357		40.25	-0.00305
40.25	0.00305		40.25	-0.04028		40.25	0
40.3125	0.00549		40.3125	-0.03906		40.25	-0.00122
40.3594	0.0061		40.375	-0.02808		40.25	-0.00488
40.4062	0.00427		40.4375	-0.01953		40.5	-0.00793
40.4531	0.00427		40.5	-0.01221		40.5	-0.0147
40.5	0.00244		40.5	-0.00977		40.5	-0.0177
40.5625	0.00183		40.5625	-0.00244		40.5	-0.0189
40.6094	-0.00183		40.625	-0.00061		40.5	-0.0153
40.6562	-0.00671		40.6875	0.00122		40.75	-0.0128
40.7031	-0.01465		40.75	0.00061		40.75	-0.0128
40.75	-0.01526		40.75	0		40.75	-0.011
40.8125	-0.0177		40.8125	0		40.75	-0.0061
40.8594	-0.0177		40.875	-0.00366		40.75	-0.00183
40.9062	-0.02075		40.9375	-0.00671		41	-0.00366
40.9531	-0.02563		41	-0.00305		41	-0.00366
41	-0.03235		41	0		41	-0.00793
41.0625	-0.03479		41.0625	-0.00244		41	-0.00244
41.1094	-0.03723		41.125	-0.00793		41	-0.00244
41.1562	-0.03418		41.1875	-0.00793		41.25	-0.0061
41.2031	-0.02808		41.25	-0.01038		41.25	-0.0122
41.25	-0.02991		41.25	-0.00916		41.25	-0.0153
41.3125	-0.03357		41.3125	-0.00854		41.25	-0.0171
41.3594	-0.04272		41.375	-0.00732		41.25	-0.0171
41.4062	-0.05066		41.4375	-0.00488		41.5	-0.0177
41.4531	-0.05493		41.5	-0.00793		41.5	-0.0159
41.5	-0.0592		41.5	-0.01343		41.5	-0.00977
41.5625	-0.06165		41.5625	-0.0116		41.5	-0.0122
41.6094	-0.06348		41.625	-0.00977		41.5	-0.0122
41.6562	-0.06348		41.6875	-0.00549		41.75	-0.0201
41.7031	-0.06409		41.75	-0.00183		41.75	-0.0275
41.75	-0.06592		41.75	0.00061		41.75	-0.036
41.8125	-0.06592		41.8125	0.00732		41.75	-0.0446
41.8594	-0.06348		41.875	0.00671		41.75	-0.0531
41.9062	-0.06165		41.9375	0.00488		42	-0.0604
41.9531	-0.06042		42	-0.00122		42	-0.0653
42	-0.05859		42	-0.00366		42	-0.072
42.0625	-0.0592		42.0625	-0.00549		42	-0.0745
42.1094	-0.05493		42.125	-0.00977		42	-0.0745
42.1562	-0.05798		42.1875	-0.0177		42.25	-0.0696
42.2031	-0.06042		42.25	-0.02075		42.25	-0.0647
42.25	-0.06287		42.25	-0.02258		42.25	-0.0623
42.3125	-0.06165		42.3125	-0.02258		42.25	-0.0623
42.3594	-0.06409		42.375	-0.02075		42.25	-0.0592
42.4062	-0.06348		42.4375	-0.02197		42.5	-0.058
42.4531	-0.06409		42.5	-0.02502		42.5	-0.0604
42.5	-0.06042		42.5	-0.02808		42.5	-0.0659
42.5625	-0.05798		42.5625	-0.02747		42.5	-0.0684
42.6094	-0.05981		42.625	-0.02808		42.5	-0.0714
42.6562	-0.06775		42.6875	-0.02197		42.75	-0.0702
42.7031	-0.07446		42.75	-0.02075		42.75	-0.0684
42.75	-0.08118		42.75	-0.02014		42.75	-0.0671
42.8125	-0.08179		42.8125	-0.02014		42.75	-0.0696
42.8594	-0.0824		42.875	-0.02747		42.75	-0.0726
42.9062	-0.08057		42.9375	-0.03052		43	-0.072
42.9531	-0.07813		43	-0.03174		43	-0.0702
43	-0.06775		43	-0.03479		43	-0.0635
43.0625	-0.06531		43.0625	-0.03784		43	-0.0629
43.1094	-0.06104		43.125	-0.03967		43	-0.0568
43.1562	-0.06226		43.1875	-0.0415		43.25	-0.0568
43.2031	-0.06104		43.25	-0.03967		43.25	-0.0598
43.25	-0.06165		43.25	-0.03784		43.25	-0.0659
43.3125	-0.06226		43.3125	-0.0415		43.25	-0.0647
43.3594	-0.06409		43.375	-0.04883		43.25	-0.0678
43.4062	-0.06409		43.4375	-0.05615		43.5	-0.0647
43.4531	-0.06226		43.5	-0.06226		43.5	-0.0623
43.5	-0.06042		43.5	-0.06714		43.5	-0.058
43.5625	-0.05371		43.5625	-0.0708		43.5	-0.0531
43.6094	-0.04395		43.625	-0.06775		43.5	-0.0543
43.6562	-0.03113		43.6875	-0.06531		43.75	-0.0568
43.7031	-0.02258		43.75	-0.0592		43.75	-0.0592
43.75	-0.0177		43.75	-0.05798		43.75	-0.0555
43.8125	-0.01099		43.8125	-0.06165		43.75	-0.0586
43.8594	-0.00671		43.875	-0.06531		43.75	-0.0549
43.9062	0.00183		43.9375	-0.06348		44	-0.0604
43.9531	0.00427		44	-0.05859		44	-0.0623
44	0.00366		44	-0.05432		44	-0.0684
44.0625	0.00061		44.0625	-0.0531		44	-0.0708
44.1094	0.00305		44.125	-0.05493		44	-0.069
44.1562	0.00671		44.1875	-0.05066		44.25	-0.0641
44.2031	0.01465		44.25	-0.05432		44.25	-0.0531
44.25	0.02136		44.25	-0.05737		44.25	-0.0494
44.3125	0.02686		44.3125	-0.06226		44.25	-0.0464
44.3594	0.03418		44.375	-0.0708		44.25	-0.0458
44.4062	0.0354		44.4375	-0.07935		44.5	-0.044
44.4531	0.03967		44.5	-0.0824		44.5	-0.0427
44.5	0.03784		44.5	-0.0824		44.5	-0.0378
44.5625	0.03967		44.5625	-0.0769		44.5	-0.0324
44.6094	0.04028		44.625	-0.07019		44.5	-0.0238
44.6562	0.04761		44.6875	-0.0708		44.75	-0.0153
44.7031	0.05249		44.75	-0.07202		44.75	-0.011
44.75	0.06042		44.75	-0.07324		44.75	-0.0116
44.8125	0.06714		44.8125	-0.06836		44.75	-0.0104
44.8594	0.06836		44.875	-0.06287		44.75	-0.00488
44.9062	0.07324		44.9375	-0.05737		45	-0.00244
44.9531	0.07202		45	-0.05493		45	0.00244
45	0.06714		45	-0.04883		45	0.00488
45.0625	0.06287		45.0625	-0.04211		45	0.00977
45.1094	0.05798		45.125	-0.03784		45	0.0153
45.1562	0.05737		45.1875	-0.03723		45.25	0.0183
45.2031	0.06165		45.25	-0.03845		45.25	0.022
45.25	0.06409		45.25	-0.03784		45.25	0.0287
45.3125	0.06714		45.3125	-0.03906		45.25	0.0336
45.3594	0.0647		45.375	-0.0415		45.25	0.0372
45.4062	0.05798		45.4375	-0.04028		45.5	0.0409
45.4531	0.04944		45.5	-0.03662		45.5	0.0421
45.5	0.04578		45.5	-0.03052		45.5	0.0482
45.5625	0.04395		45.5625	-0.0238		45.5	0.047
45.6094	0.04761		45.625	-0.01892		45.5	0.0433
45.6562	0.04578		45.6875	-0.01038		45.75	0.0378
45.7031	0.04395		45.75	-0.00244		45.75	0.0366
45.75	0.03906		45.75	0.00183		45.75	0.0433
45.8125	0.03601		45.8125	0.00122		45.75	0.0488
45.8594	0.0354		45.875	-0.00061		45.75	0.0525
45.9062	0.03845		45.9375	-0.00244		46	0.0519
45.9531	0.03845		46	-0.00305		46	0.0513
46	0.03662		46	-0.0061		46	0.0519
46.0625	0.03662		46.0625	-0.0061		46	0.0555
46.1094	0.0354		46.125	-0.00122		46	0.0592
46.1562	0.0354		46.1875	0.00671		46.25	0.0647
46.2031	0.03418		46.25	0.00977		46.25	0.0714
46.25	0.03723		46.25	0.01221		46.25	0.0751
46.3125	0.0415		46.3125	0.01221		46.25	0.0763
46.3594	0.04639		46.375	0.01282		46.25	0.0739
46.4062	0.04395		46.4375	0.02197		46.5	0.0696
46.4531	0.03662		46.5	0.02319		46.5	0.0604
46.5	0.0293		46.5	0.02441		46.5	0.0513
46.5625	0.02808		46.5625	0.02686		46.5	0.0409
46.6094	0.03479		46.625	0.02808		46.5	0.0366
46.6562	0.03906		46.6875	0.03235		46.75	0.0415
46.7031	0.04211		46.75	0.03418		46.75	0.0421
46.75	0.03967		46.75	0.03662		46.75	0.0433
46.8125	0.03296		46.8125	0.04089		46.75	0.0385
46.8594	0.02747		46.875	0.047		46.75	0.0348
46.9062	0.0238		46.9375	0.05066		47	0.0336
46.9531	0.02319		47	0.05493		47	0.0299
47	0.0238		47	0.05798		47	0.0317
47.0625	0.02014		47.0625	0.06409		47	0.0336
47.1094	0.01465		47.125	0.06531		47	0.0385
47.1562	0.01038		47.1875	0.06409		47.25	0.0385
47.2031	0.00793		47.25	0.06409		47.25	0.0385
47.25	0.01343		47.25	0.06592		47.25	0.0372
47.3125	0.01343		47.3125	0.06653		47.25	0.0403
47.3594	0.01465		47.375	0.06836		47.25	0.0427
47.4062	0.01831		47.4375	0.06531		47.5	0.0378
47.4531	0.01648		47.5	0.06287		47.5	0.0305
47.5	0.01587		47.5	0.06287		47.5	0.0171
47.5625	0.0116		47.5625	0.05981		47.5	0.0116
47.6094	0.00732		47.625	0.05127		47.5	0.00488
47.6562	0.00793		47.6875	0.04272		47.75	0.00244
47.7031	0.01709		47.75	0.03357		47.75	0.00427
47.75	0.02319		47.75	0.02747		47.75	0.00671
47.8125	0.02686		47.8125	0.02991		47.75	0.0116
47.8594	0.02441		47.875	0.03357		47.75	0.0153
47.9062	0.02197		47.9375	0.04028		48	0.0189
47.9531	0.02258		48	0.04395		48	0.0238
48	0.02258		48	0.04028		48	0.0281
48.0625	0.02197		48.0625	0.03784		48	0.0232
48.1094	0.01892		48.125	0.03479		48	0.0159
48.1562	0.01831		48.1875	0.03235		48.25	0.00977
48.2031	0.0116		48.25	0.03235		48.25	0.00732
48.25	0.01282		48.25	0.03052		48.25	0.00427
48.3125	0.01526		48.3125	0.03174		48.25	0.00427
48.3594	0.02441		48.375	0.03357		48.25	0.00122
48.4062	0.02625		48.4375	0.03723		48.5	0.00183
48.4531	0.02502		48.5	0.03601		48.5	0.00305
48.5	0.02075		48.5	0.03601		48.5	-0.00183
48.5625	0.01648		48.5625	0.02625		48.5	-0.00427
48.6094	0.01404		48.625	0.0238		48.5	-0.00671
48.6562	0.00793		48.6875	0.02258		48.75	-0.00488
48.7031	0.00183		48.75	0.02319		48.75	-0.00244
48.75	-0.00183		48.75	0.02686		48.75	0.00061
48.8125	-0.00427		48.8125	0.02747		48.75	0.00305
48.8594	-0.00549		48.875	0.03235		48.75	0.00793
48.9062	-0.00427		48.9375	0.02808		49	0.0128
48.9531	-0.00305		49	0.02747		49	0.0147
49	-0.00244		49	0.02319		49	0.0165
49.0625	0		49.0625	0.01831		49	0.0165
49.1094	-0.00366		49.125	0.0177		49	0.0232
49.1562	-0.00732		49.1875	0.0177		49.25	0.022
49.2031	-0.00977		49.25	0.02258		49.25	0.0171
49.25	-0.00549		49.25	0.02625		49.25	0.00671
49.3125	-0.00183		49.3125	0.03235		49.25	-0.00366
49.3594	0.00061		49.375	0.03357		49.25	-0.0104
49.4062	-0.00122		49.4375	0.03174		49.5	-0.0171
49.4531	-0.00671		49.5	0.02686		49.5	-0.0208
49.5	-0.00854		49.5	0.01892		49.5	-0.0177
49.5625	-0.01709		49.5625	0.01282		49.5	-0.014
49.6094	-0.02014		49.625	0.00732		49.5	-0.00854
49.6562	-0.02014		49.6875	0.00854		49.75	-0.00671
49.7031	-0.01465		49.75	0.00854		49.75	-0.00732
49.75	-0.00671		49.75	0.01465		49.75	-0.0128
49.8125	0		49.8125	0.0116		49.75	-0.0116
49.8594	0.00366		49.875	0.01221		49.75	-0.014
49.9062	0.00488		49.9375	0.01038		50	-0.0122
49.9531	0.00122		50	0.00854		50	-0.00488
50	-0.00793		50	0.00854		50	0.00183
50.0625	-0.01709		50.0625	0.00793		50	0.00916
50.1094	-0.02197		50.125	0.00916		50	0.0116
50.1562	-0.0177		50.1875	0.00732		50.25	0.011
50.2031	-0.0116		50.25	0.00122		50.25	0.00488
50.25	-0.00366		50.25	-0.00854		50.25	-0.00183
50.3125	0.0061		50.3125	-0.01221		50.25	-0.011
50.3594	0.00854		50.375	-0.01343		50.25	-0.0116
50.4062	0.01099		50.4375	-0.0061		50.5	-0.014
50.4531	0.01099		50.5	-0.00671		50.5	-0.0128
50.5	0.00793		50.5	-0.00732		50.5	-0.0183
50.5625	0.00244		50.5625	-0.00854		50.5	-0.0189
50.6094	-0.00061		50.625	-0.00732		50.5	-0.0195
50.6562	-0.00854		50.6875	-0.00305		50.75	-0.0177
50.7031	-0.00854		50.75	-0.00305		50.75	-0.0171
50.75	-0.0061		50.75	-0.00061		50.75	-0.0147
50.8125	0.00183		50.8125	0.00122		50.75	-0.0171
50.8594	0.0116		50.875	0.01038		50.75	-0.022
50.9062	0.01648		50.9375	0.01404		51	-0.0281
50.9531	0.01892		51	0.01831		51	-0.0269
51	0.02197		51	0.0116		51	-0.022
51.0625	0.02563		51.0625	0.00305		51	-0.0147
51.1094	0.02808		51.125	-0.00366		51	-0.00854
51.1562	0.03296		51.1875	-0.00732		51.25	0.00183
51.2031	0.03357		51.25	-0.00916		51.25	0.00854
51.25	0.03296		51.25	-0.00488		51.25	0.0122
51.3125	0.03601		51.3125	-0.00183		51.25	0.0189
51.3594	0.03662		51.375	0		51.25	0.025
51.4062	0.03845		51.4375	0.00366		51.5	0.0275
51.4531	0.03845		51.5	0.00549		51.5	0.0269
51.5	0.03967		51.5	0.00549		51.5	0.0281
51.5625	0.03906		51.5625	0.00427		51.5	0.0275
51.6094	0.03784		51.625	-0.00122		51.5	0.033
51.6562	0.03662		51.6875	0.00122		51.75	0.0342
51.7031	0.03845		51.75	0.00488		51.75	0.0366
51.75	0.04333		51.75	0.01343		51.75	0.0397
51.8125	0.04639		51.8125	0.02014		51.75	0.0421
51.8594	0.05249		51.875	0.01892		51.75	0.0391
51.9062	0.05554		51.9375	0.0177		52	0.0348
51.9531	0.06531		52	0.01953		52	0.0305
52	0.06409		52	0.02197		52	0.0269
52.0625	0.06165		52.0625	0.02136		52	0.0281
52.1094	0.05737		52.125	0.01953		52	0.0287
52.1562	0.0592		52.1875	0.0116		52.25	0.0354
52.2031	0.06287		52.25	0.0061		52.25	0.0378
52.25	0.06897		52.25	-0.00366		52.25	0.0421
52.3125	0.0708		52.3125	-0.01038		52.25	0.0378
52.3594	0.0708		52.375	-0.01282		52.25	0.0354
52.4062	0.07202		52.4375	-0.00977		52.5	0.0299
52.4531	0.0647		52.5	-0.00793		52.5	0.0269
52.5	0.06104		52.5	-0.00366		52.5	0.0263
52.5625	0.05676		52.5625	-0.00122		52.5	0.0293
52.6094	0.05493		52.625	0.00366		52.5	0.0354
52.6562	0.05432		52.6875	0.01221		52.75	0.0415
52.7031	0.0531		52.75	0.01282		52.75	0.0519
52.75	0.04883		52.75	0.01587		52.75	0.0586
52.8125	0.04761		52.8125	0.01648		52.75	0.0665
52.8594	0.04456		52.875	0.01648		52.75	0.0726
52.9062	0.04028		52.9375	0.02075		53	0.0775
52.9531	0.03967		53	0.02686		53	0.0714
53	0.03906		53	0.03296		53	0.0665
53.0625	0.04028		53.0625	0.04456		53	0.0598
53.1094	0.04028		53.125	0.05066		53	0.0562
53.1562	0.03906		53.1875	0.05249		53.25	0.0568
53.2031	0.03845		53.25	0.05005		53.25	0.0555
53.25	0.03906		53.25	0.04517		53.25	0.0574
53.3125	0.04089		53.3125	0.047		53.25	0.0562
53.3594	0.03845		53.375	0.05188		53.25	0.0555
53.4062	0.0354		53.4375	0.05432		53.5	0.0507
53.4531	0.03357		53.5	0.05371		53.5	0.0488
53.5	0.03174		53.5	0.05066		53.5	0.0452
53.5625	0.03052		53.5625	0.05127		53.5	0.0476
53.6094	0.02686		53.625	0.05127		53.5	0.0519
53.6562	0.02563		53.6875	0.05371		53.75	0.0482
53.7031	0.02014		53.75	0.05798		53.75	0.0464
53.75	0.01587		53.75	0.06287		53.75	0.0415
53.8125	0.00732		53.8125	0.06775		53.75	0.0415
53.8594	0		53.875	0.06836		53.75	0.0372
53.9062	-0.00183		53.9375	0.06897		54	0.0354
53.9531	-0.00671		54	0.06531		54	0.0366
54	-0.0116		54	0.06897		54	0.0415
54.0625	-0.02075		54.0625	0.06592		54	0.0458
54.1094	-0.03052		54.125	0.06042		54	0.0415
54.1562	-0.0415		54.1875	0.0531		54.25	0.0336
54.2031	-0.047		54.25	0.04517		54.25	0.0214
54.25	-0.05127		54.25	0.04089		54.25	0.0183
54.3125	-0.047		54.3125	0.04272		54.25	0.0165
54.3594	-0.04639		54.375	0.04883		54.25	0.0201
54.4062	-0.04517		54.4375	0.05676		54.5	0.0232
54.4531	-0.04944		54.5	0.06775		54.5	0.0238
54.5	-0.05493		54.5	0.06775		54.5	0.0238
54.5625	-0.05798		54.5625	0.06592		54.5	0.0171
54.6094	-0.0592		54.625	0.05981		54.5	0.00977
54.6562	-0.05859		54.6875	0.05493		54.75	0.00244
54.7031	-0.06348		54.75	0.05432		54.75	-0.00305
54.75	-0.06409		54.75	0.05554		54.75	-0.0116
54.8125	-0.06714		54.8125	0.05737		54.75	-0.0147
54.8594	-0.06653		54.875	0.05737		54.75	-0.0171
54.9062	-0.06775		54.9375	0.0592		55	-0.0189
54.9531	-0.06531		55	0.0531		55	-0.0189
55	-0.06226		55	0.05188		55	-0.0256
55.0625	-0.06042		55.0625	0.05066		55	-0.0299
55.1094	-0.06104		55.125	0.05371		55	-0.0336
55.1562	-0.0647		55.1875	0.05371		55.25	-0.033
55.2031	-0.06775		55.25	0.04639		55.25	-0.0348
55.25	-0.07141		55.25	0.04089		55.25	-0.0354
55.3125	-0.0708		55.3125	0.03296		55.25	-0.0391
55.3594	-0.0769		55.375	0.0293		55.25	-0.0409
55.4062	-0.08118		55.4375	0.02319		55.5	-0.0421
55.4531	-0.08545		55.5	0.01648		55.5	-0.0458
55.5	-0.08362		55.5	0.01038		55.5	-0.0464
55.5625	-0.07324		55.5625	0.0116		55.5	-0.0519
55.6094	-0.06104		55.625	0.01221		55.5	-0.0476
55.6562	-0.05432		55.6875	0.00977		55.75	-0.0488
55.7031	-0.05066		55.75	0.00305		55.75	-0.0488
55.75	-0.05127		55.75	-0.00854		55.75	-0.047
55.8125	-0.05493		55.8125	-0.01526		55.75	-0.0488
55.8594	-0.05737		55.875	-0.02441		55.75	-0.0525
55.9062	-0.06104		55.9375	-0.02808		56	-0.0592
55.9531	-0.0592		56	-0.0293		56	-0.0604
56	-0.05859		56	-0.02869		56	-0.0623
56.0625	-0.0598		56.0625	-0.0354		56	-0.0586
56.1094	-0.0592		56.125	-0.04639		56	-0.0635
56.1562	-0.05737		56.1875	-0.05493		56.25	-0.0696
56.2031	-0.047		56.25	-0.0592		56.25	-0.0757
56.25	-0.0415		56.25	-0.05249		56.25	-0.0781
56.3125	-0.04028		56.3125	-0.047		56.25	-0.0745
56.3594	-0.04456		56.375	-0.03967		56.25	-0.0708
56.4062	-0.05249		56.4375	-0.0354		56.5	-0.0647
56.4531	-0.058		56.5	-0.03113		56.5	-0.0568
56.5	-0.06287		56.5	-0.02625		56.5	-0.0488
56.5625	-0.06165		56.5625	-0.02625		56.5	-0.0525
56.6094	-0.05798		56.625	-0.02991		56.5	-0.0525
56.6562	-0.05005		56.6875	-0.03296		56.75	-0.0562
56.7031	-0.04944		56.75	-0.03479		56.75	-0.0604
56.75	-0.0513		56.75	-0.03906		56.75	-0.0598
56.8125	-0.05554		56.8125	-0.04211		56.75	-0.0623
56.8594	-0.05493		56.875	-0.05066		56.75	-0.0629
56.9062	-0.05249		56.9375	-0.05432		57	-0.0641
56.9531	-0.04517		57	-0.06226		57	-0.061
57	-0.0372		57	-0.06958		57	-0.0592
57.0625	-0.03174		57.0625	-0.07263		57	-0.0549
57.1094	-0.02075		57.125	-0.07629		57	-0.0525
57.1562	-0.01953		57.1875	-0.07446		57.25	-0.0464
57.2031	-0.01526		57.25	-0.07324		57.25	-0.0433
57.25	-0.01282		57.25	-0.06775		57.25	-0.0427
57.3125	-0.0061		57.3125	-0.06409		57.25	-0.0427
57.3594	0		57.375	-0.05676		57.25	-0.0446
57.4062	0.00244		57.4375	-0.05798		57.5	-0.0427
57.4531	-0.00122		57.5	-0.06775		57.5	-0.047
57.5	0		57.5	-0.07568		57.5	-0.0488
57.5625	0.00061		57.5625	-0.08118		57.5	-0.047
57.6094	0.00061		57.625	-0.08179		57.5	-0.0446
57.6562	0.00427		57.6875	-0.08179		57.75	-0.0421
57.7031	0.00977		57.75	-0.07751		57.75	-0.0433
57.75	0.01587		57.75	-0.07446		57.75	-0.0464
57.8125	0.01892		57.8125	-0.07019		57.75	-0.0494
57.8594	0.01892		57.875	-0.07324		57.75	-0.0452
57.9062	0.01709		57.9375	-0.06653		58	-0.0433
57.9531	0.01465		58	-0.06104		58	-0.0391
58	0.01343		58	-0.05493		58	-0.0317
58.0625	0.01099		58.0625	-0.04883		58	-0.025
58.1094	0.00854		58.125	-0.04456		58	-0.0208
58.1562	0.00427		58.1875	-0.04028		58.25	-0.0183
58.2031	0.00732		58.25	-0.03906		58.25	-0.0189
58.25	0.01465		58.25	-0.03845		58.25	-0.022
58.3125	0.0238		58.3125	-0.03662		58.25	-0.022
58.3594	0.03357		58.375	-0.03296		58.25	-0.0287
58.4062	0.05066		58.4375	-0.03174		58.5	-0.0317
58.4531	0.08545		58.5	-0.03113		58.5	-0.0311
58.5	0.14038		58.5	-0.03723		58.5	-0.0281
58.5625	0.21362		58.5625	-0.04272		58.5	-0.0208
58.6094	0.30029		58.625	-0.04944		58.5	-0.0153
58.6562	0.38757		58.6875	-0.05737		58.75	-0.00916
58.7031	0.46143		58.75	-0.0592		58.75	-0.0061
58.75	0.52063		58.75	-0.06226		58.75	-0.00244
58.8125	0.56458		58.8125	-0.06165		58.75	-0.00488
58.8594	0.60059		58.875	-0.05981		58.75	-0.0061
58.9062	0.6366		58.9375	-0.05676		59	-0.0116
58.9531	0.66833		59	-0.05615		59	-0.0104
59	0.70679		59	-0.05249		59	-0.0153
59.0625	0.75684		59.0625	-0.04944		59	-0.0165
59.1094	0.82703		59.125	-0.047		59	-0.0153
59.1562	0.91064		59.1875	-0.0415		59.25	-0.0165
59.2031	1.00464		59.25	-0.03662		59.25	-0.0177
59.25	1.09314		59.25	-0.03296		59.25	-0.0189
59.3125	1.16882		59.3125	-0.03113		59.25	-0.0159
59.3594	1.21887		59.375	-0.02991		59.25	-0.011
59.4062	1.22864		59.4375	-0.02991		59.5	-0.00366
59.4531	1.19629		59.5	-0.02563		59.5	0
59.5	1.12244		59.5	-0.01831		59.5	0
59.5625	1.01501		59.5625	-0.00854		59.5	-0.00244
59.6094	0.88745		59.625	-0.00061		59.5	-0.00549
59.6562	0.74951		59.6875	-0.00305		59.75	-0.00732
59.7031	0.61951		59.75	-0.00793		59.75	-0.00916
59.75	0.5011		59.75	-0.0177		59.75	-0.0122
59.8125	0.39429		59.8125	-0.02014		59.75	-0.0128
59.8594	0.29419		59.875	-0.02075		59.75	-0.0153
59.9062	0.20264		59.9375	-0.02136		60	-0.0128
59.9531	0.1178		60	-0.02502		60	-0.00793
60	0.04761		60	-0.02747		60	-0.00183
60.0625	-0.01648		60.0625	-0.02686		60	0.00122
60.1094	-0.0708		60.125	-0.02808		60	0.00671
60.1562	-0.11047		60.1875	-0.02686		60.25	0.00427
60.2031	-0.13794		60.25	-0.02258		60.25	0.00549
60.25	-0.15625		60.25	-0.01648		60.25	0.00427
60.3125	-0.16968		60.3125	-0.01587		60.25	0.00488
60.3594	-0.17761		60.375	-0.01648		60.25	0.00305
60.4062	-0.18555		60.4375	-0.01831		60.5	-0.00122
60.4531	-0.19104		60.5	-0.01831		60.5	-0.00671
60.5	-0.20874		60.5	-0.01221		60.5	-0.00916
60.5625	-0.22827		60.5625	-0.00793		60.5	-0.0104
60.6094	-0.25757		60.625	-0.00671		60.5	-0.011
60.6562	-0.28076		60.6875	-0.0061		60.75	-0.0116
60.7031	-0.29846		60.75	-0.00549		60.75	-0.0128
60.75	-0.31433		60.75	-0.00671		60.75	-0.00793
60.8125	-0.33386		60.8125	-0.0061		60.75	-0.00305
60.8594	-0.35522		60.875	-0.00061		60.75	0.00061
60.9062	-0.37598		60.9375	0.00488		61	0.00183
60.9531	-0.39734		61	0.01404		61	0.00366
61	-0.40588		61	0.01404		61	0.00244
61.0625	-0.40771		61.0625	0.01099		61	0.00244
61.1094	-0.40222		61.125	0.00366		61	0
61.1562	-0.39734		61.1875	0.00183		61.25	0.00244
61.2031	-0.39917		61.25	-0.00305		61.25	0.00977
61.25	-0.40039		61.25	-0.00244		61.25	0.00793
61.3125	-0.40771		61.3125	-0.00671		61.25	0
61.3594	-0.41199		61.375	-0.0061		61.25	-0.0116
61.4062	-0.42603		61.4375	-0.00488		61.5	-0.0238
61.4531	-0.43579		61.5	-0.00122		61.5	-0.0299
61.5	-0.44861		61.5	0.00305		61.5	-0.0366
61.5625	-0.45776		61.5625	0.00305		61.5	-0.044
61.6094	-0.46448		61.625	0.00183		61.5	-0.0458
61.6562	-0.46692		61.6875	-0.00427		61.75	-0.0464
61.7031	-0.46448		61.75	-0.00732		61.75	-0.047
61.75	-0.46387		61.75	-0.00427		61.75	-0.0482
61.8125	-0.46448		61.8125	0.00366		61.75	-0.0446
61.8594	-0.46082		61.875	0.01343		61.75	-0.0397
61.9062	-0.45227		61.9375	0.01526		62	-0.033
61.9531	-0.43823		62	0.01099		62	-0.0317
62	-0.42236		62	0.00183		62	-0.0281
62.0625	-0.40588		62.0625	-0.00061		62	-0.0263
62.1094	-0.39246		62.125	-0.00366		62	-0.0201
62.1562	-0.38391		62.1875	-0.00549		62.25	-0.0208
62.2031	-0.37292		62.25	-0.00488		62.25	-0.0244
62.25	-0.35583		62.25	-0.00854		62.25	-0.0317
62.3125	-0.3418		62.3125	-0.01343		62.25	-0.0354
62.3594	-0.32654		62.375	-0.02197		62.25	-0.0427
62.4062	-0.31311		62.4375	-0.03052		62.5	-0.0537
62.4531	-0.30518		62.5	-0.03967		62.5	-0.0629
62.5	-0.29297		62.5	-0.03845		62.5	-0.0745
62.5625	-0.28015		62.5625	-0.03967		62.5	-0.0787
62.6094	-0.26428		62.625	-0.03662		62.5	-0.0873
62.6562	-0.24353		62.6875	-0.03418		62.75	-0.0922
62.7031	-0.22156		62.75	-0.03235		62.75	-0.0952
62.75	-0.20386		62.75	-0.02869		62.75	-0.0928
62.8125	-0.19104		62.8125	-0.02991		62.75	-0.0928
62.8594	-0.18188		62.875	-0.03296		62.75	-0.0873
62.9062	-0.177		62.9375	-0.03601		63	-0.0848
62.9531	-0.17151		63	-0.03662		63	-0.0818
63	-0.16907		63	-0.04211		63	-0.0739
63.0625	-0.16296		63.0625	-0.04272		63	-0.0732
63.1094	-0.16174		63.125	-0.04578		63	-0.0714
63.1562	-0.1593		63.1875	-0.04333		63.25	-0.0708
63.2031	-0.15991		63.25	-0.04639		63.25	-0.0671
63.25	-0.15747		63.25	-0.04883		63.25	-0.0623
63.3125	-0.1532		63.3125	-0.05066		63.25	-0.0574
63.3594	-0.14465		63.375	-0.05249		63.25	-0.0555
63.4062	-0.14343		63.4375	-0.05066		63.5	-0.0519
63.4531	-0.1355		63.5	-0.05249		63.5	-0.0519
63.5	-0.1239		63.5	-0.05615		63.5	-0.0562
63.5625	-0.11353		63.5625	-0.06226		63.5	-0.061
63.6094	-0.10071		63.625	-0.06653		63.5	-0.0653
63.6562	-0.0946		63.6875	-0.07446		63.75	-0.0696
63.7031	-0.09338		63.75	-0.0824		63.75	-0.0696
63.75	-0.08972		63.75	-0.0885		63.75	-0.0696
63.8125	-0.0885		63.8125	-0.08911		63.75	-0.0659
63.8594	-0.08728		63.875	-0.07996		63.75	-0.0586
63.9062	-0.08728		63.9375	-0.06836		64	-0.0507
63.9531	-0.07996		64	-0.06165		64	-0.0458
64	-0.07019		64	-0.05798		64	-0.0427
64.0625	-0.05554		64.0625	-0.06165		64	-0.0366
64.1094	-0.047		64.125	-0.07202		64	-0.0311
64.1562	-0.03784		64.1875	-0.07874		64.25	-0.0299
64.2031	-0.03784		64.25	-0.08423		64.25	-0.0287
64.25	-0.0354		64.25	-0.08423		64.25	-0.0263
64.3125	-0.03174		64.3125	-0.07996		64.25	-0.0232
64.3594	-0.01953		64.375	-0.0824		64.25	-0.0153
64.4062	-0.00916		64.4375	-0.08789		64.5	-0.0165
64.4531	0.00061		64.5	-0.09033		64.5	-0.0189
64.5	0.00305		64.5	-0.08911		64.5	-0.0171
64.5625	0.00122		64.5625	-0.08118		64.5	-0.00977
64.6094	0.00305		64.625	-0.07446		64.5	-0.00122
64.6562	0.00732		64.6875	-0.06592		64.75	0.00793
64.7031	0.01526		64.75	-0.06042		64.75	0.0153
64.75	0.01282		64.75	-0.05005		64.75	0.0177
64.8125	0.00427		64.8125	-0.04883		64.75	0.0214
64.8594	-0.00549		64.875	-0.05188		64.75	0.0183
64.9062	-0.01099		64.9375	-0.0592		65	0.0171
64.9531	-0.01282		65	-0.06348		65	0.0134
65	-0.00854		65	-0.0647		65	0.00977
65.0625	-0.00366		65.0625	-0.0647		65	0.00488
65.1094	0.00061		65.125	-0.05981		65	0.00305
65.1562	0.00977		65.1875	-0.05737		65.25	0.00366
65.2031	0.01282		65.25	-0.0531		65.25	0.00977
65.25	0.01587		65.25	-0.05249		65.25	0.0153
65.3125	0.0177		65.3125	-0.04456		65.25	0.0171
65.3594	0.01709		65.375	-0.03967		65.25	0.022
65.4062	0.02075		65.4375	-0.02869		65.5	0.025
65.4531	0.02075		65.5	-0.02747		65.5	0.0354
65.5	0.02319		65.5	-0.0293		65.5	0.0397
65.5625	0.02319		65.5625	-0.03418		65.5	0.0415
65.6094	0.0232		65.625	-0.03845		65.5	0.044
65.6562	0.01953		65.6875	-0.03784		65.75	0.0421
65.7031	0.01953		65.75	-0.0354		65.75	0.044
65.75	0.01892		65.75	-0.03052		65.75	0.0397
65.8125	0.01953		65.8125	-0.02625		65.75	0.0372
65.8594	0.01587		65.875	-0.01831		65.75	0.0397
65.9062	0.00854		65.9375	-0.01465		66	0.0476
65.9531	0.00549		66	-0.00671		66	0.0537
66	0.00366		66	-0.00183		66	0.0586
66.0625	0.00916		66.0625	0.00549		66	0.0635
66.1094	0.0061		66.125	0.01282		66	0.0678
66.1562	0.00427		66.1875	0.01648		66.25	0.072
66.2031	0.00122		66.25	0.02014		66.25	0.0732
66.25	0		66.25	0.02197		66.25	0.0732
66.3125	-0.00061		66.3125	0.02625		66.25	0.0696
66.3594	-0.00305		66.375	0.02991		66.25	0.0702
66.4062	-0.00671		66.4375	0.03662		66.5	0.0647
66.4531	-0.01099		66.5	0.03723		66.5	0.0592
66.5	-0.00916		66.5	0.03784		66.5	0.0604
66.5625	-0.01282		66.5625	0.03784		66.5	0.0574
66.6094	-0.01587		66.625	0.03967		66.5	0.0598
66.6562	-0.02075		66.6875	0.0415		66.75	0.0562
66.7031	-0.02075		66.75	0.04639		66.75	0.0507
66.75	-0.02136		66.75	0.05371		66.75	0.0458
66.8125	-0.01892		66.8125	0.0531		66.75	0.0421
66.8594	-0.01648		66.875	0.05249		66.75	0.0433
66.9062	-0.01404		66.9375	0.05249		67	0.0427
66.9531	-0.0061		67	0.05737		67	0.0452
67	-0.00671		67	0.0592		67	0.0494
67.0625	-0.00488		67.0625	0.05859		67	0.0501
67.1094	-0.0061		67.125	0.04944		67	0.0494
67.1562	-0.00732		67.1875	0.04028		67.25	0.0488
67.2031	-0.00793		67.25	0.03479		67.25	0.0427
67.25	-0.00916		67.25	0.02625		67.25	0.0385
67.3125	-0.01282		67.3125	0.02136		67.25	0.0342
67.3594	-0.01404		67.375	0.01526		67.25	0.0305
67.4062	-0.01831		67.4375	0.01526		67.5	0.0293
67.4531	-0.02563		67.5	0.01343		67.5	0.0287
67.5	-0.03052		67.5	0.01526		67.5	0.0256
67.5625	-0.03479		67.5625	0.01587		67.5	0.0281
67.6094	-0.03113		67.625	0.02136		67.5	0.0287
67.6562	-0.02808		67.6875	0.03296		67.75	0.0293
67.7031	-0.0238		67.75	0.03784		67.75	0.0281
67.75	-0.02136		67.75	0.04395		67.75	0.025
67.8125	-0.02197		67.8125	0.04639		67.75	0.0208
67.8594	-0.02258		67.875	0.04883		67.75	0.0183
67.9062	-0.02563		67.9375	0.04883		68	0.025
67.9531	-0.02808		68	0.04578		68	0.0299
68	-0.03052		68	0.04395		68	0.0311
68.0625	-0.03357		68.0625	0.04211		68	0.0311
68.1094	-0.03662		68.125	0.04517		68	0.0269
68.1562	-0.03784		68.1875	0.047		68.25	0.0324
68.2031	-0.03418		68.25	0.04944		68.25	0.0311
68.25	-0.03296		68.25	0.04761		68.25	0.0342
68.3125	-0.02747		68.3125	0.04944		68.25	0.0299
68.3594	-0.02563		68.375	0.04761		68.25	0.0232
68.4062	-0.0238		68.4375	0.04456		68.5	0.014
68.4531	-0.0238		68.5	0.04272		68.5	0.00488
68.5	-0.01892		68.5	0.03723		68.5	0.00122
68.5625	-0.02014		68.5625	0.03845		68.5	0.00122
68.6094	-0.01709		68.625	0.03418		68.5	0.00916
68.6562	-0.0177		68.6875	0.0354		68.75	0.014
68.7031	-0.01404		68.75	0.0415		68.75	0.0177
68.75	-0.00916		68.75	0.04639		68.75	0.0153
68.8125	-0.0116		68.8125	0.05005		68.75	0.0159
68.8594	-0.0177		68.875	0.04822		68.75	0.0116
68.9062	-0.02808		68.9375	0.04944		69	0.00916
68.9531	-0.03418		69	0.04761		69	0.0104
69	-0.03723		69	0.04822		69	0.011
69.0625	-0.04028		69.0625	0.0415		69	0.014
69.1094	-0.04028		69.125	0.03235		69	0.00854
69.1562	-0.03845		69.1875	0.0293		69.25	0.00305
69.2031	-0.03296		69.25	0.02869		69.25	-0.00305
69.25	-0.03174		69.25	0.03052		69.25	-0.00122
69.3125	-0.03113		69.3125	0.03052		69.25	-0.00305
69.3594	-0.03479		69.375	0.02747		69.25	-0.00427
69.4062	-0.03723		69.4375	0.02441		69.5	-0.00549
69.4531	-0.04456		69.5	0.02502		69.5	-0.00488
69.5	-0.0531		69.5	0.0238		69.5	-0.00061
69.5625	-0.05981		69.5625	0.02319		69.5	0.00305
69.6094	-0.06531		69.625	0.02319		69.5	0.0061
69.6562	-0.06592		69.6875	0.02319		69.75	0.00977
69.7031	-0.06348		69.75	0.02319		69.75	0.014
69.75	-0.06042		69.75	0.02258		69.75	0.0122
69.8125	-0.05798		69.8125	0.02441		69.75	0.014
69.8594	-0.04883		69.875	0.02808		69.75	0.0104
69.9062	-0.04456		69.9375	0.0293		70	0.0104
69.9531	-0.03662		70	0.02563		70	0.00916
70	-0.0293		70	0.01831		70	0.00732
70.0625	-0.02197		70.0625	0.01343		70	0.00427
70.1094	-0.01526		70.125	0.01587		70	0.00122
70.1562	-0.0116		70.1875	0.01709		70.25	-0.00244
70.2031	-0.0116		70.25	0.02075		70.25	-0.00427
70.25	-0.00916		70.25	0.02686		70.25	-0.00671
70.3125	-0.01404		70.3125	0.03113		70.25	-0.0104
70.3594	-0.01648		70.375	0.03845		70.25	-0.00732
70.4062	-0.01831		70.4375	0.03845		70.5	-0.00366
70.4531	-0.01648		70.5	0.03784		70.5	0.00122
70.5	-0.01465		70.5	0.03479		70.5	0.00366
70.5625	-0.01221		70.5625	0.03662		70.5	0.00916
70.6094	-0.01221		70.625	0.03052		70.5	0.0159
70.6562	-0.0116		70.6875	0.0238		70.75	0.0165
70.7031	-0.01282		70.75	0.01648		70.75	0.0122
70.75	-0.01343		70.75	0.00671		70.75	0.00854
70.8125	-0.01465		70.8125	0.00427		70.75	0.00244
70.8594	-0.01892		70.875	0.00122		70.75	0.00122
70.9062	-0.02563		70.9375	0.00488		71	0.00061
70.9531	-0.02686		71	0.00977		71	0.00549
71	-0.02441		71	0.01709		71	0.00977
71.0625	-0.01953		71.0625	0.01526		71	0.0189
71.1094	-0.01526		71.125	0.01526		71	0.0195
71.1562	-0.00916		71.1875	0.01099		71.25	0.0159
71.2031	0.00305		71.25	0.01465		71.25	0.014
71.25	0.01465		71.25	0.01648		71.25	0.011
71.3125	0.02136		71.3125	0.01343		71.25	0.0128
71.3594	0.0293		71.375	0.00793		71.25	0.0122
71.4062	0.03296		71.4375	0.00549		71.5	0.0122
71.4531	0.03174		71.5	0.00427		71.5	0.0104
71.5	0.02747		71.5	0.00244		71.5	0.0128
71.5625	0.02319		71.5625	0		71.5	0.00671
71.6094	0.0177		71.625	-0.00305		71.5	0.00366
71.6562	0.02136		71.6875	-0.00122		71.75	-0.00061
71.7031	0.01953		71.75	0.00183		71.75	0.00305
71.75	0.02319		71.75	0.00244		71.75	0.00977
71.8125	0.02686		71.8125	-0.00183		71.75	0.0122
71.8594	0.03662		71.875	-0.00732		71.75	0.0153
71.9062	0.04456		71.9375	-0.00916		72	0.0153
71.9531	0.04944		72	-0.00977		72	0.0208
72	0.04822		72	-0.01343		72	0.022
72.0625	0.04761		72.0625	-0.0116		72	0.0287
72.1094	0.04639		72.125	-0.01221		72	0.0299
72.1562	0.04333		72.1875	-0.01038		72.25	0.0348
72.2031	0.04578		72.25	-0.01038		72.25	0.033
72.25	0.05066		72.25	-0.01038		72.25	0.0311
72.3125	0.0592		72.3125	-0.00854		72.25	0.0299
72.3594	0.06592		72.375	0.00305		72.25	0.0336
72.4062	0.06897		72.4375	0.00671		72.5	0.0427
72.4531	0.07019		72.5	0.01099		72.5	0.0501
72.5	0.06775		72.5	0.01343		72.5	0.058
72.5625	0.06653		72.5625	0.01404		72.5	0.0635
72.6094	0.06226		72.625	0.01709		72.5	0.0708
72.6562	0.0592		72.6875	0.01587		72.75	0.0696
72.7031	0.05737		72.75	0.01465		72.75	0.0714
72.75	0.05859		72.75	0.01404		72.75	0.069
72.8125	0.05859		72.8125	0.02075		72.75	0.0684
72.8594	0.05737		72.875	0.02014		72.75	0.0708
72.9062	0.05676		72.9375	0.01892		73	0.0702
72.9531	0.05371		73	0.01282		73	0.072
73	0.05554		73	0.01343		73	0.0739
73.0625	0.04761		73.0625	0.01648		73	0.0775
73.1094	0.03967		73.125	0.02319		73	0.0732
73.1562	0.03479		73.1875	0.03296		73.25	0.0678
73.2031	0.03479		73.25	0.0415		73.25	0.058
73.25	0.03235		73.25	0.04883		73.25	0.0543
73.3125	0.03357		73.3125	0.04639		73.25	0.0525
73.3594	0.03235		73.375	0.04517		73.25	0.0494
73.4062	0.03174		73.4375	0.03967		73.5	0.0501
73.4531	0.03113		73.5	0.03967		73.5	0.0525
73.5	0.0238		73.5	0.03967		73.5	0.058
73.5625	0.01587		73.5625	0.04333		73.5	0.0623
73.6094	0.00488		73.625	0.04639		73.5	0.0641
73.6562	-0.00122		73.6875	0.05188		73.75	0.0647
73.7031	-0.00793		73.75	0.05737		73.75	0.0665
73.75	-0.01343		73.75	0.0592		73.75	0.0659
73.8125	-0.0238		73.8125	0.05859		73.75	0.0623
73.8594	-0.02808		73.875	0.06226		73.75	0.0555
73.9062	-0.03357		73.9375	0.07019		74	0.0494
73.9531	-0.04211		74	0.07141		74	0.0476
74	-0.04761		74	0.06836		74	0.0427
74.0625	-0.05432		74.0625	0.05859		74	0.0385
74.1094	-0.05005		74.125	0.05249		74	0.0336
74.1562	-0.04822		74.1875	0.04944		74.25	0.0317
74.2031	-0.04456		74.25	0.04578		74.25	0.0287
74.25	-0.04639		74.25	0.0415		74.25	0.0256
74.3125	-0.04822		74.3125	0.0415		74.25	0.0208
74.3594	-0.05005		74.375	0.03906		74.25	0.0195
74.4062	-0.04944		74.4375	0.03845		74.5	0.0201
74.4531	-0.04883		74.5	0.03723		74.5	0.0183
74.5	-0.047		74.5	0.03784		74.5	0.0195
74.5625	-0.04028		74.5625	0.04272		74.5	0.0183
74.6094	-0.03967		74.625	0.04272		74.5	0.0153
74.6562	-0.0415		74.6875	0.04517		74.75	0.011
74.7031	-0.04639		74.75	0.04639		74.75	0.00122
74.75	-0.05554		74.75	0.04761		74.75	-0.00793
74.8125	-0.06409		74.8125	0.047		74.75	-0.014
74.8594	-0.06958		74.875	0.0415		74.75	-0.0128
74.9062	-0.07507		74.9375	0.03479		75	-0.0201
74.9531	-0.07629		75	0.02625		75	-0.0238
75	-0.07507		75	0.02075		75	-0.0324
75.0625	-0.07751		75.0625	0.01587		75	-0.0354
75.1094	-0.07996		75.125	0.01648		75	-0.0336
75.1562	-0.08484		75.1875	0.01648		75.25	-0.0336
75.2031	-0.09094		75.25	0.01404		75.25	-0.0324
75.25	-0.09216		75.25	0.00916		75.25	-0.0354
75.3125	-0.09705		75.3125	0.00366		75.25	-0.0385
75.3594	-0.0995		75.375	0		75.25	-0.0476
75.4062	-0.09766		75.4375	0.00244		75.5	-0.0574
75.4531	-0.09521		75.5	0.00488		75.5	-0.0659
75.5	-0.09521		75.5	0.00549		75.5	-0.072
75.5625	-0.09705		75.5625	0.00427		75.5	-0.0775
75.6094	-0.09338		75.625	-0.00305		75.5	-0.083
75.6562	-0.08911		75.6875	-0.00671		75.75	-0.0855
75.7031	-0.08118		75.75	-0.01343		75.75	-0.0873
75.75	-0.0769		75.75	-0.02136		75.75	-0.0787
75.8125	-0.07019		75.8125	-0.02747		75.75	-0.0769
75.8594	-0.06531		75.875	-0.02991		75.75	-0.0726
75.9062	-0.05554		75.9375	-0.03113		76	-0.0714
75.9531	-0.05188		76	-0.03357		76	-0.072
76	-0.04761		76	-0.0354		76	-0.0739
76.0625	-0.04761		76.0625	-0.03967		76	-0.0775
76.1094	-0.05127		76.125	-0.03906		76	-0.0806
76.1562	-0.05737		76.1875	-0.0415		76.25	-0.0842
76.2031	-0.06165		76.25	-0.04395		76.25	-0.083
76.25	-0.06042		76.25	-0.05066		76.25	-0.083
76.3125	-0.05737		76.3125	-0.05493		76.25	-0.0769
76.3594	-0.04578		76.375	-0.05432		76.25	-0.072
76.4062	-0.04272		76.4375	-0.05249		76.5	-0.072
76.4531	-0.04028		76.5	-0.05066		76.5	-0.069
76.5	-0.03906		76.5	-0.05249		76.5	-0.0659
76.5625	-0.03479		76.5625	-0.05188		76.5	-0.0641
76.6094	-0.03357		76.625	-0.04639		76.5	-0.0647
76.6562	-0.03296		76.6875	-0.04211		76.75	-0.0647
76.7031	-0.03845		76.75	-0.04028		76.75	-0.0726
76.75	-0.04211		76.75	-0.03967		76.75	-0.0763
76.8125	-0.0415		76.8125	-0.0415		76.75	-0.0812
76.8594	-0.04822		76.875	-0.04761		76.75	-0.0775
76.9062	-0.05066		76.9375	-0.05554		77	-0.072
76.9531	-0.05371		77	-0.06287		77	-0.0696
77	-0.0549		77	-0.06653		77	-0.0635
77.0625	-0.05371		77.0625	-0.06287		77	-0.0617
77.1094	-0.05493		77.125	-0.06287		77	-0.0574
77.1562	-0.05676		77.1875	-0.0647		77.25	-0.0586
77.2031	-0.0592		77.25	-0.06104		77.25	-0.0604
77.25	-0.05981		77.25	-0.05493		77.25	-0.0598
77.3125	-0.0592		77.3125	-0.04639		77.25	-0.0562
77.3594	-0.05493		77.375	-0.04333		77.25	-0.0513
77.4062	-0.04944		77.4375	-0.047		77.5	-0.0476
77.4531	-0.04028		77.5	-0.05005		77.5	-0.0446
77.5	-0.03479		77.5	-0.04761		77.5	-0.0427
77.5625	-0.03418		77.5625	-0.04944		77.5	-0.0354
77.6094	-0.033		77.625	-0.05005		77.5	-0.0385
77.6562	-0.03113		77.6875	-0.05066		77.75	-0.0403
77.7031	-0.02319		77.75	-0.05127		77.75	-0.0433
77.75	-0.02136		77.75	-0.05127		77.75	-0.0488
77.8125	-0.01404		77.8125	-0.05493		77.75	-0.0574
77.8594	-0.01343		77.875	-0.06042		77.75	-0.0647
77.9062	-0.01099		77.9375	-0.06165		78	-0.0678
77.9531	-0.01953		78	-0.06226		78	-0.0653
78	-0.02686		78	-0.06348		78	-0.0555
78.0625	-0.0354		78.0625	-0.0647		78	-0.0549
78.1094	-0.03723		78.125	-0.06653		78	-0.0543
78.1562	-0.03418		78.1875	-0.06348		78.25	-0.0568
78.2031	-0.03113		78.25	-0.06226		78.25	-0.0555
78.25	-0.02563		78.25	-0.06348		78.25	-0.0555
78.3125	-0.02258		78.3125	-0.06226		78.25	-0.058
78.3594	-0.02197		78.375	-0.0592		78.25	-0.0623
78.4062	-0.02258		78.4375	-0.05005		78.5	-0.0653
78.4531	-0.02502		78.5	-0.04639		78.5	-0.0604
78.5	-0.02625		78.5	-0.04822		78.5	-0.0574
78.5625	-0.02563		78.5625	-0.04944		78.5	-0.0446
78.6094	-0.02563		78.625	-0.04822		78.5	-0.0366
78.6562	-0.02808		78.6875	-0.04333		78.75	-0.0263
78.7031	-0.02808		78.75	-0.03906		78.75	-0.0269
78.75	-0.02991		78.75	-0.03845		78.75	-0.0281
78.8125	-0.0293		78.8125	-0.03967		78.75	-0.0281
78.8594	-0.02625		78.875	-0.03845		78.75	-0.0263
78.9062	-0.0238		78.9375	-0.03601		79	-0.0214
78.9531	-0.02197		79	-0.03296		79	-0.0183
79	-0.02014		79	-0.02563		79	-0.0153
79.0625	-0.01831		79.0625	-0.01892		79	-0.0159
79.1094	-0.01282		79.125	-0.01648		79	-0.0128
79.1562	-0.00732		79.1875	-0.0177		79.25	-0.0147
79.2031	-0.00305		79.25	-0.02319		79.25	-0.0116
79.25	0.00305		79.25	-0.02869		79.25	-0.00854
79.3125	0.00427		79.3125	-0.03113		79.25	-0.00183
79.3594	0.0061		79.375	-0.03662		79.25	0.00244
79.4062	0.00549		79.4375	-0.03845		79.5	0.00061
79.4531	0.00732		79.5	-0.03662		79.5	-0.00427
79.5	0.00793		79.5	-0.02991		79.5	-0.00549
79.5625	0.00793		79.5625	-0.02075		79.5	-0.00549
79.6094	0.00427		79.625	-0.01343		79.5	-0.0061
79.6562	0.0061		79.6875	-0.00549		79.75	-0.00549
79.7031	0.00977		79.75	-0.00366		79.75	-0.00488
79.75	0.00916		79.75	-0.00244		79.75	-0.00671
79.8125	0.00732		79.8125	-0.00549		79.75	-0.00366
79.8594	0.00732		79.875	-0.00916		79.75	-0.0061
79.9062	0.0061		79.9375	-0.01343		80	-0.00488
79.9531	0.00916		80	-0.01648		80	-0.00488
80	0.00488		80	-0.02075		80	-0.00183
80.0625	0.00366		80.0625	-0.0238		80	-0.00366
80.1094	0.00244		80.125	-0.0238		80	-0.00549
80.1562	0.00183		80.1875	-0.02197		80.25	-0.00854
80.2031	-0.0061		80.25	-0.01648		80.25	-0.00732
80.25	-0.01343		80.25	-0.01648		80.25	-0.00854
80.3125	-0.02258		80.3125	-0.01526		80.25	-0.00732
80.3594	-0.02625		80.375	-0.01831		80.25	-0.00732
80.4062	-0.03235		80.4375	-0.01404		80.5	-0.00916
80.4531	-0.03601		80.5	-0.01709		80.5	-0.00671
80.5	-0.04028		80.5	-0.02075		80.5	-0.00916
80.5625	-0.04333		80.5625	-0.0293		80.5	-0.0104
80.6094	-0.04211		80.625	-0.03723		80.5	-0.0122
80.6562	-0.03967		80.6875	-0.04517		80.75	-0.0122
80.7031	-0.03601		80.75	-0.04761		80.75	-0.014
80.75	-0.03052		80.75	-0.04639		80.75	-0.0153
80.8125	-0.02991		80.8125	-0.03723		80.75	-0.0183
80.8594	-0.03174		80.875	-0.03113		80.75	-0.0195
80.9062	-0.03784		80.9375	-0.02808		81	-0.0183
80.9531	-0.0427		81	-0.02869		81	-0.0183
81	-0.05127		81	-0.02441		81	-0.0189
81.0625	-0.05371		81.0625	-0.01953		81	-0.014
81.1094	-0.06287		81.125	-0.01343		81	-0.0104
81.1562	-0.06958		81.1875	-0.01343		81.25	-0.0061
81.2031	-0.07324		81.25	-0.01221		81.25	-0.00732
81.25	-0.0708		81.25	-0.01587		81.25	-0.0122
81.3125	-0.06775		81.3125	-0.01465		81.25	-0.0147
81.3594	-0.06042		81.375	-0.01648		81.25	-0.014
81.4062	-0.05737		81.4375	-0.01526		81.5	-0.0208
81.4531	-0.05615		81.5	-0.01587		81.5	-0.0269
81.5	-0.05432		81.5	-0.01404		81.5	-0.033
81.5625	-0.05676		81.5625	-0.01221		81.5	-0.0378
81.6094	-0.05493		81.625	-0.01709		81.5	-0.0372
81.6562	-0.05493		81.6875	-0.01831		81.75	-0.0409
81.7031	-0.05676		81.75	-0.01892		81.75	-0.0409
81.75	-0.05859		81.75	-0.01648		81.75	-0.0427
81.8125	-0.06287		81.8125	-0.02197		81.75	-0.0354
81.8594	-0.06226		81.875	-0.02747		81.75	-0.0324
81.9062	-0.06226		81.9375	-0.03479		82	-0.0281
81.9531	-0.05859		82	-0.03601		82	-0.0281
82	-0.06104		82	-0.03662		82	-0.0256
82.0625	-0.06348		82.0625	-0.03235		82	-0.0281
82.1094	-0.06653		82.125	-0.02441		82	-0.0305
82.1562	-0.06714		82.1875	-0.0177		82.25	-0.036
82.2031	-0.06958		82.25	-0.01282		82.25	-0.0433
82.25	-0.07202		82.25	-0.01465		82.25	-0.0452
82.3125	-0.07263		82.3125	-0.01282		82.25	-0.0519
82.3594	-0.07141		82.375	-0.01709		82.25	-0.0537
82.4062	-0.06775		82.4375	-0.02136		82.5	-0.0549
82.4531	-0.06836		82.5	-0.02686		82.5	-0.0531
82.5	-0.07263		82.5	-0.03662		82.5	-0.058
82.5625	-0.07751		82.5625	-0.04272		82.5	-0.0617
82.6094	-0.07751		82.625	-0.04517		82.5	-0.0671
82.6562	-0.08118		82.6875	-0.04272		82.75	-0.0708
82.7031	-0.07813		82.75	-0.03845		82.75	-0.0684
82.75	-0.07568		82.75	-0.03174		82.75	-0.0708
82.8125	-0.07141		82.8125	-0.02747		82.75	-0.0732
82.8594	-0.0647		82.875	-0.02747		82.75	-0.0732
82.9062	-0.06531		82.9375	-0.03235		83	-0.0739
82.9531	-0.06958		83	-0.03845		83	-0.0775
83	-0.07263		83	-0.04456		83	-0.08
83.0625	-0.07385		83.0625	-0.05066		83	-0.0848
83.1094	-0.0769		83.125	-0.05005		83	-0.0855
83.1562	-0.07751		83.1875	-0.04883		83.25	-0.0818
83.2031	-0.0769		83.25	-0.04761		83.25	-0.0806
83.25	-0.0708		83.25	-0.05249		83.25	-0.0794
83.3125	-0.06165		83.3125	-0.05249		83.25	-0.0806
83.3594	-0.06042		83.375	-0.05798		83.25	-0.0806
83.4062	-0.0592		83.4375	-0.06104		83.5	-0.0787
83.4531	-0.05737		83.5	-0.0647		83.5	-0.0769
83.5	-0.05066		83.5	-0.06897		83.5	-0.0714
83.5625	-0.04517		83.5625	-0.07202		83.5	-0.0684
83.6094	-0.03784		83.625	-0.07446		83.5	-0.0684
83.6562	-0.03418		83.6875	-0.07751		83.75	-0.0732
83.7031	-0.03052		83.75	-0.07324		83.75	-0.0757
83.75	-0.0293		83.75	-0.07019		83.75	-0.0769
83.8125	-0.02808		83.8125	-0.06836		83.75	-0.0696
83.8594	-0.02563		83.875	-0.06531		83.75	-0.0629
83.9062	-0.01953		83.9375	-0.06348		84	-0.0568
83.9531	-0.00916		84	-0.06042		84	-0.0525
84	-0.00244		84	-0.06042		84	-0.0513
84.0625	0		84.0625	-0.06653		84	-0.0464
84.1094	0.00488		84.125	-0.07507		84	-0.0427
84.1562	0.00549		84.1875	-0.08118		84.25	-0.0372
84.2031	0.00916		84.25	-0.08545		84.25	-0.036
84.25	0.00977		84.25	-0.08667		84.25	-0.0324
84.3125	0.01587		84.3125	-0.09155		84.25	-0.0336
84.3594	0.02258		84.375	-0.09521		84.25	-0.0299
84.4062	0.03723		84.4375	-0.09583		84.5	-0.0275
84.4531	0.04333		84.5	-0.08972		84.5	-0.0263
84.5	0.05127		84.5	-0.0885		84.5	-0.0195
84.5625	0.05493		84.5625	-0.08362		84.5	-0.022
84.6094	0.05554		84.625	-0.08362		84.5	-0.0214
84.6562	0.05188		84.6875	-0.07996		84.75	-0.0189
84.7031	0.04822		84.75	-0.07813		84.75	-0.0128
84.75	0.04211		84.75	-0.07629		84.75	-0.0122
84.8125	0.04211		84.8125	-0.07263		84.75	-0.00854
84.8594	0.04639		84.875	-0.07019		84.75	-0.00549
84.9062	0.05005		84.9375	-0.06348		85	0.00061
84.9531	0.05615		85	-0.06104		85	0.00671
85	0.06042		85	-0.05432		85	0.011
85.0625	0.0647		85.0625	-0.04639		85	0.0183
85.1094	0.06775		85.125	-0.03296		85	0.0263
85.1562	0.06531		85.1875	-0.02808		85.25	0.0354
85.2031	0.06348		85.25	-0.02502		85.25	0.0366
85.25	0.06104		85.25	-0.02258		85.25	0.0366
85.3125	0.05615		85.3125	-0.02319		85.25	0.0348
85.3594	0.05066		85.375	-0.02197		85.25	0.0372
85.4062	0.04333		85.4375	-0.02258		85.5	0.0385
85.4531	0.04089		85.5	-0.0238		85.5	0.0372
85.5	0.03723		85.5	-0.02625		85.5	0.0385
85.5625	0.03296		85.5625	-0.02014		85.5	0.0403
85.6094	0.02625		85.625	-0.01709		85.5	0.0452
85.6562	0.02441		85.6875	-0.0061		85.75	0.0446
85.7031	0.02441		85.75	0.00122		85.75	0.047
85.75	0.03174		85.75	0.01099		85.75	0.0482
85.8125	0.03296		85.8125	0.01404		85.75	0.0488
85.8594	0.0311		85.875	0.01526		85.75	0.0464
85.9062	0.0293		85.9375	0.01526		86	0.044
85.9531	0.02502		86	0.01709		86	0.0415
86	0.0238		86	0.01892		86	0.0397
86.0625	0.02625		86.0625	0.02014		86	0.044
86.1094	0.03662		86.125	0.0238		86	0.0458
86.1562	0.04883		86.1875	0.0238		86.25	0.0513
86.2031	0.0598		86.25	0.02991		86.25	0.0549
86.25	0.06042		86.25	0.0293		86.25	0.0574
86.3125	0.05676		86.3125	0.02869		86.25	0.058
86.3594	0.05066		86.375	0.02258		86.25	0.0568
86.4062	0.04211		86.4375	0.01709		86.5	0.0519
86.4531	0.03601		86.5	0.01587		86.5	0.0452
86.5	0.03113		86.5	0.01831		86.5	0.0421
86.5625	0.02808		86.5625	0.02563		86.5	0.036
86.6094	0.02686		86.625	0.03418		86.5	0.0354
86.6562	0.02808		86.6875	0.04272		86.75	0.033
86.7031	0.0238		86.75	0.04639		86.75	0.0366
86.75	0.02502		86.75	0.05066		86.75	0.0427
86.8125	0.02808		86.8125	0.05371		86.75	0.0452
86.8594	0.03174		86.875	0.05798		86.75	0.047
86.9062	0.03601		86.9375	0.06836		87	0.044
86.9531	0.03174		87	0.07507		87	0.0446
87	0.03052		87	0.0824		87	0.0391
87.0625	0.02502		87.0625	0.08667		87	0.0354
87.1094	0.0177		87.125	0.0885		87	0.0324
87.1562	0.01099		87.1875	0.0824		87.25	0.0342
87.2031	0.00305		87.25	0.07751		87.25	0.0348
87.25	-0.00122		87.25	0.07019		87.25	0.0317
87.3125	-0.00488		87.3125	0.06775		87.25	0.0299
87.3594	-0.00732		87.375	0.07202		87.25	0.0281
87.4062	-0.01099		87.4375	0.06714		87.5	0.0305
87.4531	-0.01343		87.5	0.06592		87.5	0.0269
87.5	-0.01709		87.5	0.06226		87.5	0.0232
87.5625	-0.01587		87.5625	0.0592		87.5	0.0208
87.6094	-0.01343		87.625	0.0531		87.5	0.0195
87.6562	-0.00916		87.6875	0.04639		87.75	0.0171
87.7031	-0.00366		87.75	0.04395		87.75	0.0128
87.75	-0.00061		87.75	0.04517		87.75	0.0061
87.8125	0.00366		87.8125	0.05371		87.75	0.00244
87.8594	0.00732		87.875	0.0592		87.75	0.00183
87.9062	0.01587		87.9375	0.06348		88	-0.00366
87.9531	0.02563		88	0.06226		88	-0.00977
88	0.03845		88	0.06409		88	-0.014
88.0625	0.04211		88.0625	0.05981		88	-0.014
88.1094	0.04089		88.125	0.05615		88	-0.0122
88.1562	0.03052		88.1875	0.05432		88.25	-0.00305
88.2031	0.01587		88.25	0.04944		88.25	0.00244
88.25	-0.00183		88.25	0.04761		88.25	0.0122
88.3125	-0.01282		88.3125	0.03845		88.25	0.0177
88.3594	-0.01831		88.375	0.03479		88.25	0.0159
88.4062	-0.0116		88.4375	0.03601		88.5	0.0147
88.4531	-0.00305		88.5	0.04395		88.5	0.0147
88.5	0.00244		88.5	0.04822		88.5	0.0201
88.5625	0.00427		88.5625	0.047		88.5	0.0214
88.6094	0.00183		88.625	0.04456		88.5	0.0195
88.6562	-0.00061		88.6875	0.03784		88.75	0.0128
88.7031	-0.00122		88.75	0.03601		88.75	0.00854
88.75	-0.00305		88.75	0.02869		88.75	0.00732
88.8125	-0.00122		88.8125	0.02075		88.75	0.00916
88.8594	-0.00488		88.875	0.01587		88.75	0.0122
88.9062	-0.00427		88.9375	0.01526		89	0.0122
88.9531	-0.00488		89	0.01526		89	0.0159
89	-0.00732		89	0.01465		89	0.0116
89.0625	-0.01526		89.0625	0.01038		89	0.0116
89.1094	-0.01587		89.125	0.0061		89	0.00671
89.1562	-0.02258		89.1875	0.00854		89.25	0.00305
89.2031	-0.02625		89.25	0.01038		89.25	-0.00305
89.25	-0.03113		89.25	0.01526		89.25	-0.0104
89.3125	-0.03235		89.3125	0.01892		89.25	-0.0171
89.3594	-0.03174		89.375	0.01831		89.25	-0.0171
89.4062	-0.0293		89.4375	0.01709		89.5	-0.00977
89.4531	-0.02869		89.5	0.01099		89.5	-0.0061
89.5	-0.02563		89.5	0.00671		89.5	-0.00366
89.5625	-0.02197		89.5625	0.00671		89.5	-0.00366
89.6094	-0.02075		89.625	0.00732		89.5	-0.00488
89.6562	-0.01648		89.6875	0.00732		89.75	-0.0061
89.7031	-0.01343		89.75	0.00427		89.75	-0.011
89.75	-0.00916		89.75	0.00244		89.75	-0.0177
89.8125	-0.00549		89.8125	0.00183		89.75	-0.0214
89.8594	-0.00793		89.875	-0.00366		89.75	-0.022
89.9062	-0.00854		89.9375	-0.00793		90	-0.0159
89.9531	-0.00854		90	-0.01099		90	-0.00977
90	-0.00427		90	-0.01282		90	-0.00305
90.0625	-0.00488		90.0625	-0.01282		90	-0.00061
90.1094	-0.00305		90.125	-0.01221		90	-0.00183
90.1562	-0.00427		90.1875	-0.00854		90.25	-0.0104
90.2031	0.00305		90.25	-0.00183		90.25	-0.014
90.25	0.00854		90.25	0.00732		90.25	-0.022
90.3125	0.01526		90.3125	0.00977		90.25	-0.0238
90.3594	0.01831		90.375	0.00916		90.25	-0.0275
90.4062	0.02075		90.4375	0.00671		90.5	-0.0293
90.4531	0.02319		90.5	-0.00183		90.5	-0.0317
90.5	0.01892		90.5	-0.00671		90.5	-0.0311
90.5625	0.01221		90.5625	-0.01404		90.5	-0.0324
90.6094	0.00427		90.625	-0.01709		90.5	-0.036
90.6562	0		90.6875	-0.01526		90.75	-0.036
90.7031	-0.00061		90.75	-0.00793		90.75	-0.0366
90.75	0.00366		90.75	-0.00427		90.75	-0.0275
90.8125	0.00977		90.8125	0		90.75	-0.0256
90.8594	0.0116		90.875	0.00061		90.75	-0.0232
90.9062	0.01526		90.9375	0.00671		91	-0.0226
90.9531	0.01099		91	0.0061		91	-0.0153
91	0.00977		91	0.00183		91	-0.014
91.0625	0.01038		91.0625	0.00122		91	-0.0122
91.1094	0.0147		91.125	0.00061		91	-0.0153
91.1562	0.01709		91.1875	-0.00122		91.25	-0.0134
91.2031	0.01831		91.25	-0.00549		91.25	-0.00671
91.25	0.01648		91.25	-0.01038		91.25	-0.00366
91.3125	0.02014		91.3125	-0.01526		91.25	-0.00061
91.3594	0.02747		91.375	-0.01587		91.25	0
91.4062	0.03113		91.4375	-0.0177		91.5	-0.00366
91.4531	0.03906		91.5	-0.01648		91.5	-0.00427
91.5	0.04822		91.5	-0.0177		91.5	-0.00366
91.5625	0.05615		91.5625	-0.02258		91.5	0
91.6094	0.05737		91.625	-0.02808		91.5	0.00366
91.6562	0.05371		91.6875	-0.0293		91.75	0.00488
91.7031	0.047		91.75	-0.02686		91.75	-0.00183
91.75	0.04578		91.75	-0.01709		91.75	-0.0061
91.8125	0.04517		91.8125	-0.01099		91.75	-0.00732
91.8594	0.04578		91.875	-0.00854		91.75	-0.00061
91.9062	0.04395		91.9375	-0.00549		92	0.00549
91.9531	0.04395		92	-0.00305		92	0.00916
92	0.047		92	-0.00488		92	0.0159
92.0625	0.04944		92.0625	-0.00244		92	0.0226
92.1094	0.04822		92.125	-0.00549		92	0.033
92.1562	0.04822		92.1875	-0.00488		92.25	0.0366
92.2031	0.04761		92.25	-0.00671		92.25	0.0409
92.25	0.05249		92.25	-0.00854		92.25	0.0403
92.3125	0.05554		92.3125	-0.01099		92.25	0.0458
92.3594	0.05981		92.375	-0.01221		92.25	0.0452
92.4062	0.06592		92.4375	-0.01343		92.5	0.0452
92.4531	0.07141		92.5	-0.01221		92.5	0.0421
92.5	0.07385		92.5	-0.00732		92.5	0.0385
92.5625	0.07324		92.5625	-0.00549		92.5	0.0391
92.6094	0.07202		92.625	0.00061		92.5	0.0391
92.6562	0.06714		92.6875	0.00671		92.75	0.0391
92.7031	0.06653		92.75	0.01465		92.75	0.0372
92.75	0.05981		92.75	0.01953		92.75	0.0348
92.8125	0.05737		92.8125	0.02197		92.75	0.0354
92.8594	0.05188		92.875	0.02258		92.75	0.0427
92.9062	0.05188		92.9375	0.02563		93	0.0482
92.9531	0.05005		93	0.02686		93	0.0537
93	0.05066		93	0.02808		93	0.058
93.0625	0.04578		93.0625	0.02808		93	0.0574
93.1094	0.0415		93.125	0.02686		93	0.058
93.1562	0.03967		93.1875	0.02869		93.25	0.0592
93.2031	0.03601		93.25	0.03235		93.25	0.0604
93.25	0.03479		93.25	0.03723		93.25	0.0623
93.3125	0.03174		93.3125	0.04517		93.25	0.0617
93.3594	0.03174		93.375	0.04883		93.25	0.0555
93.4062	0.02747		93.4375	0.05493		93.5	0.0537
93.4531	0.02014		93.5	0.05188		93.5	0.0531
93.5	0.0116		93.5	0.04578		93.5	0.0537
93.5625	0.00916		93.5625	0.04333		93.5	0.0555
93.6094	0.00244		93.625	0.04578		93.5	0.0537
93.6562	-0.00244		93.6875	0.04761		93.75	0.0568
93.7031	-0.00977		93.75	0.04761		93.75	0.058
93.75	-0.01343		93.75	0.04333		93.75	0.058
93.8125	-0.0116		93.8125	0.03784		93.75	0.0574
93.8594	-0.01465		93.875	0.03784		93.75	0.0549
93.9062	-0.01648		93.9375	0.03662		94	0.0519
93.9531	-0.02136		94	0.03845		94	0.0458
94	-0.02502		94	0.03906		94	0.0409
94.0625	-0.02563		94.0625	0.04395		94	0.0354
94.1094	-0.02808		94.125	0.04822		94	0.0348
94.1562	-0.03113		94.1875	0.0531		94.25	0.0293
94.2031	-0.03357		94.25	0.05493		94.25	0.0269
94.25	-0.03357		94.25	0.05493		94.25	0.025
94.3125	-0.03784		94.3125	0.05676		94.25	0.0281
94.3594	-0.03601		94.375	0.0531		94.25	0.0317
94.4062	-0.03662		94.4375	0.0531		94.5	0.0354
94.4531	-0.03723		94.5	0.05127		94.5	0.0348
94.5	-0.03906		94.5	0.0531		94.5	0.033
94.5625	-0.04456		94.5625	0.05188		94.5	0.0324
94.6094	-0.04944		94.625	0.04761		94.5	0.0238
94.6562	-0.05615		94.6875	0.04578		94.75	0.0195
94.7031	-0.06042		94.75	0.04639		94.75	0.00977
94.75	-0.06714		94.75	0.05127		94.75	0.00427
94.8125	-0.06714		94.8125	0.05493		94.75	-0.00183
94.8594	-0.06897		94.875	0.0592		94.75	-0.00916
94.9062	-0.06775		94.9375	0.0647		95	-0.0128
94.9531	-0.06958		95	0.06958		95	-0.0134
95	-0.07751		95	0.06592		95	-0.0104
95.0625	-0.07935		95.0625	0.05249		95	-0.00977
95.1094	-0.07874		95.125	0.03845		95	-0.00488
95.1562	-0.07568		95.1875	0.02441		95.25	-0.00244
95.2031	-0.07019		95.25	0.01892		95.25	0.00183
95.25	-0.06775		95.25	0.01953		95.25	-0.00183
95.3125	-0.06409		95.3125	0.02136		95.25	-0.0104
95.3594	-0.06226		95.375	0.02563		95.25	-0.0177
95.4062	-0.06104		95.4375	0.02625		95.5	-0.025
95.4531	-0.05859		95.5	0.02075		95.5	-0.0256
95.5	-0.0592		95.5	0.01221		95.5	-0.0317
95.5625	-0.06775		95.5625	0.00427		95.5	-0.033
95.6094	-0.07202		95.625	-0.00366		95.5	-0.0372
95.6562	-0.08118		95.6875	-0.00671		95.75	-0.0391
95.7031	-0.0824		95.75	-0.01038		95.75	-0.044
95.75	-0.07996		95.75	-0.01282		95.75	-0.0513
95.8125	-0.07568		95.8125	-0.01282		95.75	-0.061
95.8594	-0.0708		95.875	-0.01221		95.75	-0.0726
95.9062	-0.06836		95.9375	-0.01587		96	-0.0745
95.9531	-0.07019		96	-0.02319		96	-0.0769
96	-0.07202		96	-0.03357		96	-0.0745
96.0625	-0.07751		96.0625	-0.03662		96	-0.0726
96.1094	-0.08545		96.125	-0.04272		96	-0.0684
96.1562	-0.08667		96.1875	-0.047		96.25	-0.0684
96.2031	-0.08423		96.25	-0.05554		96.25	-0.0665
96.25	-0.07996		96.25	-0.06348		96.25	-0.0641
96.3125	-0.07202		96.3125	-0.0647		96.25	-0.0604
96.3594	-0.06592		96.375	-0.07019		96.25	-0.0519
96.4062	-0.0629		96.4375	-0.07202		96.5	-0.0568
96.4531	-0.06042		96.5	-0.0769		96.5	-0.0592
96.5	-0.06042		96.5	-0.07629		96.5	-0.0623
96.5625	-0.06531		96.5625	-0.07568		96.5	-0.0647
96.6094	-0.06653		96.625	-0.07263		96.5	-0.0635
96.6562	-0.0647		96.6875	-0.06958		96.75	-0.0665
96.7031	-0.05981		96.75	-0.06836		96.75	-0.0629
96.75	-0.05554		96.75	-0.06104		96.75	-0.0617
96.8125	-0.0531		96.8125	-0.06287		96.75	-0.0555
96.8594	-0.04456		96.875	-0.06042		96.75	-0.0537
96.9062	-0.04089		96.9375	-0.0592		97	-0.0537
96.9531	-0.03418		97	-0.05615		97	-0.0549
97	-0.03235		97	-0.05371		97	-0.0507
97.0625	-0.0354		97.0625	-0.05493		97	-0.0488
97.1094	-0.03967		97.125	-0.05737		97	-0.0488
97.1562	-0.04272		97.1875	-0.06409		97.25	-0.0476
97.2031	-0.04822		97.25	-0.06226		97.25	-0.0531
97.25	-0.05127		97.25	-0.06714		97.25	-0.0494
97.3125	-0.04761		97.3125	-0.06287		97.25	-0.0519
97.3594	-0.04333		97.375	-0.06348		97.25	-0.0494
97.4062	-0.03235		97.4375	-0.06042		97.5	-0.0458
97.4531	-0.03296		97.5	-0.05737		97.5	-0.0433
97.5	-0.03479		97.5	-0.05554		97.5	-0.0427
97.5625	-0.03784		97.5625	-0.04761		97.5	-0.0464
97.6094	-0.03235		97.625	-0.04333		97.5	-0.0476
97.6562	-0.0275		97.6875	-0.03662		97.75	-0.0464
97.7031	-0.02136		97.75	-0.03723		97.75	-0.0378
97.75	-0.02136		97.75	-0.03723		97.75	-0.036
97.8125	-0.02014		97.8125	-0.03662		97.75	-0.0348
97.8594	-0.01953		97.875	-0.03357		97.75	-0.0317
97.9062	-0.02075		97.9375	-0.03784		98	-0.0244
97.9531	-0.0238		98	-0.04761		98	-0.022
98	-0.02625		98	-0.05554		98	-0.025
98.0625	-0.02441		98.0625	-0.06226		98	-0.0299
98.1094	-0.0177		98.125	-0.06042		98	-0.036
98.1562	-0.01099		98.1875	-0.06042		98.25	-0.036
98.2031	-0.00488		98.25	-0.05676		98.25	-0.0403
98.25	-0.00061		98.25	-0.05432		98.25	-0.0372
98.3125	0.00183		98.3125	-0.04883		98.25	-0.036
98.3594	0.00183		98.375	-0.04456		98.25	-0.0336
98.4062	0.00732		98.4375	-0.03906		98.5	-0.033
98.4531	0.01099		98.5	-0.03479		98.5	-0.0348
98.5	0.02197		98.5	-0.03235		98.5	-0.0348
98.5625	0.02258		98.5625	-0.0293		98.5	-0.0336
98.6094	0.01831		98.625	-0.03357		98.5	-0.0299
98.6562	0.00977		98.6875	-0.03601		98.75	-0.0317
98.7031	0.00488		98.75	-0.03662		98.75	-0.033
98.75	0.00061		98.75	-0.03357		98.75	-0.0372
98.8125	-0.00244		98.8125	-0.03235		98.75	-0.0293
98.8594	-0.0061		98.875	-0.02686		98.75	-0.0281
98.9062	-0.00244		98.9375	-0.01953		99	-0.0269
98.9531	0.00305		99	-0.0116		99	-0.0293
99	0.00732		99	-0.00549		99	-0.0311
99.0625	0.00916		99.0625	-0.00488		99	-0.0305
99.1094	0.00977		99.125	-0.00977		99	-0.0317
99.1562	0.00732		99.1875	-0.0177		99.25	-0.0311
99.2031	0.00488		99.25	-0.02686		99.25	-0.0263
99.25	-0.00122		99.25	-0.02808		99.25	-0.0226
99.3125	-0.00977		99.3125	-0.02808		99.25	-0.0226
99.3594	-0.01892		99.375	-0.02502		99.25	-0.0244
99.4062	-0.02258		99.4375	-0.02563		99.5	-0.0287
99.4531	-0.02869		99.5	-0.02808		99.5	-0.0299
99.5	-0.03052		99.5	-0.02869		99.5	-0.0275
99.5625	-0.03174		99.5625	-0.03174		99.5	-0.0238
99.6094	-0.03235		99.625	-0.03296		99.5	-0.0208
99.6562	-0.03418		99.6875	-0.0354		99.75	-0.0147
99.7031	-0.04089		99.75	-0.03845		99.75	-0.00977
99.75	-0.04456		99.75	-0.04028		99.75	-0.011
99.8125	-0.04333		99.8125	-0.03723		99.75	-0.0134
[truncated: 98,004 more rows]

## Sheet: Figure 4 C iii
acsf	Larixyl acetate	acsf
0.43	0	0.45
1.14	0.69	0.35
1.1	0.5	0.69
0.83	0.38	0.53
0.82	0.27	1.34
1.83	0.6	1.89
2	0.28	1.25
1.1	0	2.74
2.53	2.05	2.64
2.2	0.94	2.11
2.11	0.6	1.55
1.44	0	0
4.1	1.29	1.39
0.68	0.1	0.1
