# Supplementary material for: The cation channel mechanisms of subthreshold inward depolarizing currents in the mice VTA dopaminergic neurons and their roles in the chronic-stress-induced depression-like behavior
Source: eLife. 2024 Dec 6;12:RP88319. doi: 10.7554/eLife.88319 (PMC11623934; doi:10.7554/eLife.88319)
Supplement: Figure 4—source data 5. [file elife-88319-fig4-data5.xlsx]

## Sheet: Figure 4 D i
Time(ms)	RMP(mV)
0	-48.6315
0.9	-48.6789
1.8	-48.6416
2.7	-48.6993
3.6	-48.7196
4.5	-48.7569
5.4	-48.6654
6.3	-48.6552
7.2	-48.6654
8.1	-48.6416
9	-48.6586
9.9	-48.6586
10.8	-48.6382
11.7	-48.6349
12.6	-48.6043
13.5	-48.5535
14.4	-48.5365
15.3	-48.5908
16.2	-48.645
17.1	-48.7027
18	-48.6518
18.9	-48.6349
19.8	-48.6213
20.7	-48.662
21.6	-48.6247
22.5	-48.6518
23.4	-48.7603
24.3	-48.7739
25.2	-48.6857
26.1	-48.5975
27	-48.5569
27.9	-48.5908
28.8	-48.5908
29.7	-48.6247
30.6	-48.6077
31.5	-48.6518
32.4	-48.5704
33.3	-48.5433
34.2	-48.5399
35.1	-48.5501
36	-48.6518
36.9	-48.7027
37.8	-48.645
38.7	-48.584
39.6	-48.6111
40.5	-48.6823
41.4	-48.6349
42.3	-48.6993
43.2	-48.723
44.1	-48.7739
45	-48.7264
45.9	-48.6518
46.8	-48.6111
47.7	-48.6416
48.6	-48.6857
49.5	-48.6654
50.4	-48.662
51.3	-48.6586
52.2	-48.6111
53.1	-48.6247
54	-48.6145
54.9	-48.6111
55.8	-48.706
56.7	-48.7908
57.6	-48.7705
58.5	-48.6586
59.4	-48.6484
60.3	-48.6382
61.2	-48.6281
62.1	-48.6349
63	-48.645
63.9	-48.6586
64.8	-48.6654
65.7	-48.5806
66.6	-48.5433
67.5	-48.5569
68.4	-48.5975
69.3	-48.5942
70.2	-48.6213
71.1	-48.6281
72	-48.5636
72.9	-48.5942
73.8	-48.5636
74.7	-48.4958
75.6	-48.5128
76.5	-48.5806
77.4	-48.567
78.3	-48.4958
79.2	-48.5026
80.1	-48.489
81	-48.4992
81.9	-48.523
82.8	-48.5399
83.7	-48.5975
84.6	-48.6077
85.5	-48.5636
86.4	-48.506
87.3	-48.5263
88.2	-48.5365
89.1	-48.5162
90	-48.5636
90.9	-48.5297
91.8	-48.4653
92.7	-48.445
93.6	-48.3975
94.5	-48.3839
95.4	-48.4212
96.3	-48.4789
97.2	-48.4653
98.1	-48.4653
99	-48.4382
99.9	-48.4212
100.8	-48.4348
101.7	-48.4483
102.6	-48.523
103.5	-48.5501
104.4	-48.584
105.3	-48.489
106.2	-48.428
107.1	-48.489
108	-48.445
108.9	-48.4619
109.8	-48.4653
110.7	-48.4619
111.6	-48.4382
112.5	-48.3941
113.4	-48.3805
114.3	-48.367
115.2	-48.3873
116.1	-48.4721
117	-48.489
117.9	-48.5263
118.8	-48.4687
119.7	-48.4653
120.6	-48.523
121.5	-48.4958
122.4	-48.523
123.3	-48.6043
124.2	-48.6416
125.1	-48.5467
126	-48.445
126.9	-48.4178
127.8	-48.4212
128.7	-48.4416
129.6	-48.4924
130.5	-48.4483
131.4	-48.4619
132.3	-48.3975
133.2	-48.4043
134.1	-48.3975
135	-48.4178
135.9	-48.4789
136.8	-48.489
137.7	-48.4856
138.6	-48.4246
139.5	-48.4178
140.4	-48.5094
141.3	-48.4551
142.2	-48.4789
143.1	-48.4856
144	-48.5128
144.9	-48.5026
145.8	-48.4416
146.7	-48.4043
147.6	-48.4043
148.5	-48.4483
149.4	-48.4992
150.3	-48.4755
151.2	-48.5196
152.1	-48.5094
153	-48.5162
153.9	-48.4789
154.8	-48.5196
155.7	-48.5399
156.6	-48.6552
157.5	-48.6857
158.4	-48.584
159.3	-48.567
160.2	-48.5704
161.1	-48.5467
162	-48.584
162.9	-48.6077
163.8	-48.645
164.7	-48.6586
165.6	-48.5704
166.5	-48.4992
167.4	-48.5026
168.3	-48.5467
169.2	-48.6009
170.1	-48.6111
171	-48.6213
171.9	-48.5603
172.8	-48.5772
173.7	-48.5942
174.6	-48.5433
175.5	-48.5874
176.4	-48.662
177.3	-48.6688
178.2	-48.6382
179.1	-48.6145
180	-48.6281
180.9	-48.6247
181.8	-48.6518
182.7	-48.6688
183.6	-48.7433
184.5	-48.8078
185.4	-48.7569
186.3	-48.6823
187.2	-48.6823
188.1	-48.723
189	-48.706
189.9	-48.7603
190.8	-48.7976
191.7	-48.7128
192.6	-48.7366
193.5	-48.6484
194.4	-48.6179
195.3	-48.6552
196.2	-48.7264
197.1	-48.784
198	-48.7196
198.9	-48.6925
199.8	-48.6552
200.7	-48.645
201.6	-48.6925
202.5	-48.6247
203.4	-48.7603
204.3	-48.7705
205.2	-48.723
206.1	-48.6416
207	-48.6484
207.9	-48.6688
208.8	-48.662
209.7	-48.6755
210.6	-48.6688
211.5	-48.6416
212.4	-48.6484
213.3	-48.5975
214.2	-48.5603
215.1	-48.5874
216	-48.6552
216.9	-48.6993
217.8	-48.645
218.7	-48.6213
219.6	-48.6315
220.5	-48.6349
221.4	-48.6789
222.3	-48.584
223.2	-48.6959
224.1	-48.7501
225	-48.6552
225.9	-48.6043
226.8	-48.5331
227.7	-48.5433
228.6	-48.5603
229.5	-48.5874
230.4	-48.6043
231.3	-48.5975
232.2	-48.6213
233.1	-48.5772
234	-48.5365
234.9	-48.567
235.8	-48.6247
236.7	-48.6722
237.6	-48.6552
238.5	-48.6145
239.4	-48.5874
240.3	-48.645
241.2	-48.6281
242.1	-48.6179
243	-48.6552
243.9	-48.6891
244.8	-48.6722
245.7	-48.6416
246.6	-48.5874
247.5	-48.6213
248.4	-48.6382
249.3	-48.6586
250.2	-48.6654
251.1	-48.645
252	-48.6552
252.9	-48.6179
253.8	-48.6009
254.7	-48.6145
255.6	-48.6586
256.5	-48.7332
257.4	-48.7433
258.3	-48.6823
259.2	-48.6484
260.1	-48.6382
261	-48.6382
261.9	-48.6484
262.8	-48.6755
263.7	-48.74
264.6	-48.74
265.5	-48.7264
266.4	-48.6722
267.3	-48.6789
268.2	-48.6993
269.1	-48.7162
270	-48.7196
270.9	-48.7196
271.8	-48.6993
272.7	-48.6823
273.6	-48.7366
274.5	-48.6755
275.4	-48.7128
276.3	-48.7637
277.2	-48.74
278.1	-48.7162
279	-48.6755
279.9	-48.6857
280.8	-48.7027
281.7	-48.6959
282.6	-48.7298
283.5	-48.7535
284.4	-48.7433
285.3	-48.6654
286.2	-48.6111
287.1	-48.6145
288	-48.6111
288.9	-48.6009
289.8	-48.6586
290.7	-48.6891
291.6	-48.6077
292.5	-48.5704
293.4	-48.5569
294.3	-48.5535
295.2	-48.5704
296.1	-48.6518
297	-48.662
297.9	-48.6586
298.8	-48.6247
299.7	-48.6111
300.6	-48.6349
301.5	-48.6281
302.4	-48.6281
303.3	-48.6349
304.2	-48.6925
305.1	-48.662
306	-48.5942
306.9	-48.6043
307.8	-48.6179
308.7	-48.6111
309.6	-48.6315
310.5	-48.6213
311.4	-48.6111
312.3	-48.6077
313.2	-48.5806
314.1	-48.5569
315	-48.5636
315.9	-48.6349
316.8	-48.6586
317.7	-48.662
318.6	-48.6077
319.5	-48.5738
320.4	-48.5908
321.3	-48.6349
322.2	-48.6077
323.1	-48.645
324	-48.7162
324.9	-48.6382
325.8	-48.5365
326.7	-48.4755
327.6	-48.4789
328.5	-48.5094
329.4	-48.5603
330.3	-48.5535
331.2	-48.5467
332.1	-48.5603
333	-48.4823
333.9	-48.4517
334.8	-48.489
335.7	-48.5196
336.6	-48.5569
337.5	-48.5738
338.4	-48.4958
339.3	-48.4382
340.2	-48.5026
341.1	-48.4856
342	-48.4212
342.9	-48.4619
343.8	-48.4721
344.7	-48.4687
345.6	-48.4043
346.5	-48.3364
347.4	-48.3331
348.3	-48.3839
349.2	-48.4212
350.1	-48.4483
351	-48.4314
351.9	-48.4517
352.8	-48.4551
353.7	-48.4178
354.6	-48.3975
355.5	-48.4517
356.4	-48.5263
357.3	-48.584
358.2	-48.4856
359.1	-48.4653
360	-48.4144
360.9	-48.4246
361.8	-48.4043
362.7	-48.4144
363.6	-48.4992
364.5	-48.5094
365.4	-48.4619
366.3	-48.4111
367.2	-48.4144
368.1	-48.4619
369	-48.4687
369.9	-48.5026
370.8	-48.5263
371.7	-48.5399
372.6	-48.489
373.5	-48.5467
374.4	-48.4721
375.3	-48.4856
376.2	-48.5636
377.1	-48.5908
378	-48.5772
378.9	-48.5399
379.8	-48.5297
380.7	-48.5535
381.6	-48.5162
382.5	-48.5806
383.4	-48.6077
384.3	-48.6315
385.2	-48.6043
386.1	-48.5467
387	-48.5162
387.9	-48.5806
388.8	-48.5331
389.7	-48.5535
390.6	-48.6213
391.5	-48.5772
392.4	-48.4992
393.3	-48.506
394.2	-48.4823
395.1	-48.5399
396	-48.5908
396.9	-48.6145
397.8	-48.6145
398.7	-48.5704
399.6	-48.5535
400.5	-48.584
401.4	-48.5535
402.3	-48.6247
403.2	-48.6349
404.1	-48.6789
405	-48.6349
405.9	-48.5569
406.8	-48.567
407.7	-48.5772
408.6	-48.5738
409.5	-48.584
410.4	-48.5467
411.3	-48.5738
412.2	-48.4924
413.1	-48.5026
414	-48.4348
414.9	-48.4653
415.8	-48.5636
416.7	-48.5942
417.6	-48.5772
418.5	-48.5535
419.4	-48.5569
420.3	-48.5569
421.2	-48.5331
422.1	-48.5636
423	-48.6111
423.9	-48.6755
424.8	-48.6179
425.7	-48.523
426.6	-48.4687
427.5	-48.4958
428.4	-48.4992
429.3	-48.5433
430.2	-48.5806
431.1	-48.5636
432	-48.523
432.9	-48.4958
433.8	-48.4619
434.7	-48.4653
435.6	-48.5467
436.5	-48.6247
437.4	-48.6349
438.3	-48.5772
439.2	-48.5297
440.1	-48.5908
441	-48.5874
441.9	-48.5908
442.8	-48.5569
443.7	-48.5908
444.6	-48.5908
445.5	-48.4958
446.4	-48.4416
447.3	-48.4314
448.2	-48.4721
449.1	-48.506
450	-48.4992
450.9	-48.5297
451.8	-48.4755
452.7	-48.4856
453.6	-48.4483
454.5	-48.445
455.4	-48.4789
456.3	-48.5501
457.2	-48.6518
458.1	-48.5399
459	-48.4755
459.9	-48.4619
460.8	-48.4382
461.7	-48.4721
462.6	-48.4551
463.5	-48.5094
464.4	-48.5501
465.3	-48.523
466.2	-48.445
467.1	-48.4077
468	-48.4687
468.9	-48.4856
469.8	-48.5331
470.7	-48.5433
471.6	-48.4958
472.5	-48.4992
473.4	-48.4789
474.3	-48.4483
475.2	-48.4416
476.1	-48.4992
477	-48.5162
477.9	-48.4585
478.8	-48.4416
479.7	-48.4178
480.6	-48.4077
481.5	-48.4077
482.4	-48.3534
483.3	-48.4483
484.2	-48.4517
485.1	-48.4111
486	-48.3568
486.9	-48.2958
487.8	-48.3398
488.7	-48.3161
489.6	-48.35
490.5	-48.4144
491.4	-48.3331
492.3	-48.3873
493.2	-48.2991
494.1	-48.2347
495	-48.2483
495.9	-48.3297
496.8	-48.3941
497.7	-48.3839
498.6	-48.3398
499.5	-48.3127
500.4	-48.2924
501.3	-48.3297
502.2	-48.2924
503.1	-48.3466
504	-48.4077
504.9	-48.4111
505.8	-48.3093
506.7	-48.3229
507.6	-48.3636
508.5	-48.3263
509.4	-48.3432
510.3	-48.3398
511.2	-48.3229
512.1	-48.3025
513	-48.2686
513.9	-48.2144
514.8	-48.2483
515.7	-48.2822
516.6	-48.3398
517.5	-48.2991
518.4	-48.289
519.3	-48.2924
520.2	-48.2924
521.1	-48.3263
522	-48.2856
522.9	-48.3331
523.8	-48.4077
524.7	-48.3907
525.6	-48.2958
526.5	-48.211
527.4	-48.2483
528.3	-48.2449
529.2	-48.2686
530.1	-48.2686
531	-48.2619
531.9	-48.2652
532.8	-48.2585
533.7	-48.2178
534.6	-48.2313
535.5	-48.2788
536.4	-48.3331
537.3	-48.3195
538.2	-48.3093
539.1	-48.2347
540	-48.2686
540.9	-48.272
541.8	-48.2347
542.7	-48.2686
543.6	-48.2585
544.5	-48.2754
545.4	-48.2178
546.3	-48.1703
547.2	-48.1906
548.1	-48.1974
549	-48.2449
549.9	-48.2652
550.8	-48.2754
551.7	-48.2822
552.6	-48.2381
553.5	-48.2279
554.4	-48.2279
555.3	-48.272
556.2	-48.3331
557.1	-48.4009
558	-48.3466
558.9	-48.2619
559.8	-48.2449
560.7	-48.2246
561.6	-48.2585
562.5	-48.2856
563.4	-48.3059
564.3	-48.3331
565.2	-48.2958
566.1	-48.2619
567	-48.2279
567.9	-48.2652
568.8	-48.2924
569.7	-48.3263
570.6	-48.3398
571.5	-48.3127
572.4	-48.3195
573.3	-48.3195
574.2	-48.2924
575.1	-48.289
576	-48.3738
576.9	-48.4178
577.8	-48.3907
578.7	-48.3704
579.6	-48.3466
580.5	-48.3534
581.4	-48.3839
582.3	-48.3398
583.2	-48.4111
584.1	-48.4348
585	-48.3805
585.9	-48.289
586.8	-48.2483
587.7	-48.2652
588.6	-48.2585
589.5	-48.2381
590.4	-48.3263
591.3	-48.2551
592.2	-48.289
593.1	-48.2008
594	-48.1534
594.9	-48.194
595.8	-48.272
596.7	-48.3297
597.6	-48.3161
598.5	-48.2788
599.4	-48.2686
600.3	-48.2279
601.2	-48.2754
602.1	-48.2076
603	-48.2585
603.9	-48.3161
604.8	-48.3093
605.7	-48.1974
606.6	-48.2008
607.5	-48.2585
608.4	-48.2551
609.3	-48.2551
610.2	-48.2856
611.1	-48.2822
612	-48.2551
612.9	-48.2347
613.8	-48.1771
614.7	-48.1906
615.6	-48.2585
616.5	-48.3229
617.4	-48.3025
618.3	-48.2585
619.2	-48.2347
620.1	-48.2381
621	-48.2788
621.9	-48.2483
622.8	-48.3093
623.7	-48.3873
624.6	-48.3805
625.5	-48.2856
626.4	-48.2178
627.3	-48.2212
628.2	-48.2246
629.1	-48.2652
630	-48.2686
630.9	-48.289
631.8	-48.2924
632.7	-48.2517
633.6	-48.2042
634.5	-48.211
635.4	-48.2381
636.3	-48.3331
637.2	-48.3398
638.1	-48.3025
639	-48.2347
639.9	-48.2686
640.8	-48.2822
641.7	-48.2483
642.6	-48.2754
643.5	-48.3229
644.4	-48.3297
645.3	-48.2754
646.2	-48.1703
647.1	-48.1839
648	-48.2246
648.9	-48.2822
649.8	-48.3025
650.7	-48.3127
651.6	-48.2856
652.5	-48.272
653.4	-48.2279
654.3	-48.2178
655.2	-48.2517
656.1	-48.3229
657	-48.4077
657.9	-48.3364
658.8	-48.2788
659.7	-48.2517
660.6	-48.272
661.5	-48.2686
662.4	-48.272
663.3	-48.3195
664.2	-48.3805
665.1	-48.3195
666	-48.2449
666.9	-48.2042
667.8	-48.272
668.7	-48.2788
669.6	-48.2822
670.5	-48.2856
671.4	-48.2686
672.3	-48.2415
673.2	-48.211
674.1	-48.2144
675	-48.2042
675.9	-48.2551
676.8	-48.2652
677.7	-48.2483
678.6	-48.2144
679.5	-48.2178
680.4	-48.1974
681.3	-48.2551
682.2	-48.2178
683.1	-48.289
684	-48.3297
684.9	-48.3229
685.8	-48.2517
686.7	-48.2246
687.6	-48.2483
688.5	-48.2415
689.4	-48.2347
690.3	-48.289
691.2	-48.2822
692.1	-48.2483
693	-48.1906
693.9	-48.1398
694.8	-48.1364
695.7	-48.2076
696.6	-48.2686
697.5	-48.2619
698.4	-48.2483
699.3	-48.2144
700.2	-48.1839
701.1	-48.2313
702	-48.194
702.9	-48.2415
703.8	-48.2788
704.7	-48.272
705.6	-48.2076
706.5	-48.1669
707.4	-48.2347
708.3	-48.2042
709.2	-48.1839
710.1	-48.1906
711	-48.1839
711.9	-48.15
712.8	-48.1228
713.7	-48.1398
714.6	-48.1127
715.5	-48.1873
716.4	-48.272
717.3	-48.289
718.2	-48.2686
719.1	-48.2076
720	-48.2008
720.9	-48.211
721.8	-48.2279
722.7	-48.2347
723.6	-48.3093
724.5	-48.3263
725.4	-48.2313
726.3	-48.133
727.2	-48.0889
728.1	-48.1432
729	-48.194
729.9	-48.2076
730.8	-48.1906
731.7	-48.1805
732.6	-48.1669
733.5	-48.1059
734.4	-48.1194
735.3	-48.15
736.2	-48.2652
737.1	-48.3093
738	-48.2381
738.9	-48.1601
739.8	-48.1669
740.7	-48.211
741.6	-48.1805
742.5	-48.1873
743.4	-48.194
744.3	-48.2144
745.2	-48.1601
746.1	-48.0686
747	-48.0143
747.9	-48.0652
748.8	-48.1127
749.7	-48.1398
750.6	-48.1296
751.5	-48.0957
752.4	-48.1296
753.3	-48.0923
754.2	-48.0482
755.1	-48.0652
756	-48.1466
756.9	-48.2381
757.8	-48.2381
758.7	-48.1601
759.6	-48.1364
760.5	-48.1093
761.4	-48.133
762.3	-48.0855
763.2	-48.1635
764.1	-48.1737
765	-48.1262
765.9	-48.0821
766.8	-48.055
767.7	-48.0787
768.6	-48.1194
769.5	-48.1262
770.4	-48.1601
771.3	-48.1364
772.2	-48.133
773.1	-48.1161
774	-48.1262
774.9	-48.0618
775.8	-48.133
776.7	-48.1669
777.6	-48.1805
778.5	-48.1364
779.4	-48.133
780.3	-48.1228
781.2	-48.1432
782.1	-48.1567
783	-48.1567
783.9	-48.2279
784.8	-48.211
785.7	-48.1567
786.6	-48.1093
787.5	-48.1398
788.4	-48.1534
789.3	-48.1466
790.2	-48.1805
791.1	-48.2008
792	-48.1262
792.9	-48.1161
793.8	-48.0923
794.7	-48.0754
795.6	-48.15
796.5	-48.2212
797.4	-48.2076
798.3	-48.1669
799.2	-48.1364
800.1	-48.15
801	-48.1398
801.9	-48.1906
802.8	-48.1906
803.7	-48.2449
804.6	-48.2415
805.5	-48.1839
806.4	-48.1262
807.3	-48.15
808.2	-48.133
809.1	-48.1703
810	-48.1601
810.9	-48.1601
811.8	-48.1194
812.7	-48.1364
813.6	-48.0991
814.5	-48.0821
815.4	-48.1398
816.3	-48.2347
817.2	-48.2246
818.1	-48.1805
819	-48.1669
819.9	-48.1567
820.8	-48.1703
821.7	-48.2042
822.6	-48.1262
823.5	-48.2551
824.4	-48.2585
825.3	-48.1703
826.2	-48.1059
827.1	-48.0787
828	-48.1228
828.9	-48.1127
829.8	-48.1398
830.7	-48.1194
831.6	-48.0991
832.5	-48.1262
833.4	-48.0889
834.3	-48.0686
835.2	-48.0923
836.1	-48.211
837	-48.2313
837.9	-48.2076
838.8	-48.1567
839.7	-48.1432
840.6	-48.211
841.5	-48.2008
842.4	-48.1906
843.3	-48.1805
844.2	-48.2008
845.1	-48.1601
846	-48.1059
846.9	-48.0686
847.8	-48.0957
848.7	-48.1364
849.6	-48.1737
850.5	-48.1737
851.4	-48.1974
852.3	-48.133
853.2	-48.1771
854.1	-48.1398
855	-48.1466
855.9	-48.194
856.8	-48.2822
857.7	-48.2991
858.6	-48.1873
859.5	-48.1703
860.4	-48.1974
861.3	-48.1466
862.2	-48.2279
863.1	-48.2008
864	-48.2347
864.9	-48.2178
865.8	-48.1601
866.7	-48.133
867.6	-48.0957
868.5	-48.1601
869.4	-48.1771
870.3	-48.2076
871.2	-48.2279
872.1	-48.1805
873	-48.1873
873.9	-48.2246
874.8	-48.1839
875.7	-48.2381
876.6	-48.289
877.5	-48.2958
878.4	-48.2381
879.3	-48.2178
880.2	-48.2212
881.1	-48.2212
882	-48.2144
882.9	-48.2279
883.8	-48.2822
884.7	-48.2449
885.6	-48.194
886.5	-48.1635
887.4	-48.1534
888.3	-48.1635
889.2	-48.1364
890.1	-48.2212
891	-48.2279
891.9	-48.1906
892.8	-48.1432
893.7	-48.072
894.6	-48.0754
895.5	-48.1127
896.4	-48.1771
897.3	-48.1839
898.2	-48.1601
899.1	-48.1466
900	-48.1194
900.9	-48.1432
901.8	-48.1194
902.7	-48.2008
903.6	-48.2415
904.5	-48.2991
905.4	-48.2415
906.3	-48.1906
907.2	-48.2381
908.1	-48.2347
909	-48.2551
909.9	-48.2585
910.8	-48.2415
911.7	-48.2517
912.6	-48.1906
913.5	-48.211
914.4	-48.1873
915.3	-48.2381
916.2	-48.2991
917.1	-48.3263
918	-48.2991
918.9	-48.2686
919.8	-48.3025
920.7	-48.3161
921.6	-48.3568
922.5	-48.35
923.4	-48.3873
924.3	-48.4721
925.2	-48.3738
926.1	-48.2991
927	-48.2585
927.9	-48.3127
928.8	-48.3364
929.7	-48.3636
930.6	-48.3738
931.5	-48.3738
932.4	-48.3873
933.3	-48.3398
934.2	-48.2958
935.1	-48.3127
936	-48.3534
936.9	-48.3975
937.8	-48.3839
938.7	-48.3568
939.6	-48.3229
940.5	-48.35
941.4	-48.3398
942.3	-48.2449
943.2	-48.3297
944.1	-48.3263
945	-48.3093
945.9	-48.2212
946.8	-48.1737
947.7	-48.1974
948.6	-48.2313
949.5	-48.2856
950.4	-48.2754
951.3	-48.2686
952.2	-48.272
953.1	-48.2415
954	-48.1906
954.9	-48.2449
955.8	-48.3059
956.7	-48.3636
957.6	-48.3738
958.5	-48.3059
959.4	-48.2924
960.3	-48.2483
961.2	-48.2754
962.1	-48.2788
963	-48.3229
963.9	-48.3534
964.8	-48.3738
965.7	-48.2991
966.6	-48.2313
967.5	-48.2754
968.4	-48.2788
969.3	-48.3127
970.2	-48.3127
971.1	-48.3602
972	-48.2958
972.9	-48.2619
973.8	-48.2652
974.7	-48.2551
975.6	-48.289
976.5	-48.3127
977.4	-48.3127
978.3	-48.2551
979.2	-48.2212
980.1	-48.2313
981	-48.211
981.9	-48.2686
982.8	-48.2449
983.7	-48.3025
984.6	-48.3161
985.5	-48.2212
986.4	-48.1534
987.3	-48.1567
988.2	-48.1974
989.1	-48.1839
990	-48.2347
990.9	-48.2686
991.8	-48.2042
992.7	-48.2008
993.6	-48.1296
994.5	-48.1127
995.4	-48.1635
996.3	-48.2313
997.2	-48.2415
998.1	-48.211
999	-48.194
999.9	-48.1873
1000.8	-48.1805
1001.7	-48.2008
1002.6	-48.1805
1003.5	-48.2822
1004.4	-48.2958
1005.3	-48.2144
1006.2	-48.1432
1007.1	-48.1873
1008	-48.2076
1008.9	-48.194
1009.8	-48.1873
1010.7	-48.1771
1011.6	-48.1805
1012.5	-48.1771
1013.4	-48.1601
1014.3	-48.1364
1015.2	-48.1839
1016.1	-48.2381
1017	-48.2449
1017.9	-48.2347
1018.8	-48.1703
1019.7	-48.1805
1020.6	-48.194
1021.5	-48.2042
1022.4	-48.2279
1023.3	-48.2551
1024.2	-48.3297
1025.1	-48.2381
1026	-48.1534
1026.9	-48.1093
1027.8	-48.1262
1028.7	-48.1567
1029.6	-48.1839
1030.5	-48.1839
1031.4	-48.1839
1032.3	-48.1364
1033.2	-48.1432
1034.1	-48.1059
1035	-48.1296
1035.9	-48.1974
1036.8	-48.2415
1037.7	-48.2381
1038.6	-48.1771
1039.5	-48.1161
1040.4	-48.1534
1041.3	-48.1771
1042.2	-48.1669
1043.1	-48.2076
1044	-48.2212
1044.9	-48.2246
1045.8	-48.1296
1046.7	-48.1093
1047.6	-48.1262
1048.5	-48.1771
1049.4	-48.1771
1050.3	-48.1974
1051.2	-48.1601
1052.1	-48.2042
1053	-48.1601
1053.9	-48.1296
1054.8	-48.1228
1055.7	-48.1703
1056.6	-48.2483
1057.5	-48.2856
1058.4	-48.1839
1059.3	-48.1398
1060.2	-48.1228
1061.1	-48.1601
1062	-48.1534
1062.9	-48.1974
1063.8	-48.2686
1064.7	-48.2652
1065.6	-48.2076
1066.5	-48.1364
1067.4	-48.1567
1068.3	-48.2212
1069.2	-48.2279
1070.1	-48.2585
1071	-48.2517
1071.9	-48.2313
1072.8	-48.2076
1073.7	-48.2347
1074.6	-48.2279
1075.5	-48.2449
1076.4	-48.3059
1077.3	-48.3161
1078.2	-48.2585
1079.1	-48.2076
1080	-48.2449
1080.9	-48.2517
1081.8	-48.3161
1082.7	-48.3025
1083.6	-48.3466
1084.5	-48.3568
1085.4	-48.2754
1086.3	-48.2279
1087.2	-48.2347
1088.1	-48.2313
1089	-48.2042
1089.9	-48.2347
1090.8	-48.3093
1091.7	-48.2178
1092.6	-48.2212
1093.5	-48.1771
1094.4	-48.1601
1095.3	-48.1839
1096.2	-48.2517
1097.1	-48.2381
1098	-48.2483
1098.9	-48.2449
1099.8	-48.2144
1100.7	-48.2212
1101.6	-48.211
1102.5	-48.2381
1103.4	-48.3059
1104.3	-48.35
1105.2	-48.2958
1106.1	-48.2347
1107	-48.2585
1107.9	-48.2924
1108.8	-48.2788
1109.7	-48.2754
1110.6	-48.2754
1111.5	-48.2449
1112.4	-48.2144
1113.3	-48.2042
1114.2	-48.1839
1115.1	-48.1906
1116	-48.2686
1116.9	-48.3059
1117.8	-48.2991
1118.7	-48.2652
1119.6	-48.2415
1120.5	-48.2551
1121.4	-48.2313
1122.3	-48.2991
1123.2	-48.2754
1124.1	-48.4077
1125	-48.3195
1125.9	-48.2042
1126.8	-48.1703
1127.7	-48.1839
1128.6	-48.1669
1129.5	-48.2076
1130.4	-48.2246
1131.3	-48.2042
1132.2	-48.194
1133.1	-48.15
1134	-48.133
1134.9	-48.133
1135.8	-48.1839
1136.7	-48.2619
1137.6	-48.2347
1138.5	-48.2483
1139.4	-48.1839
1140.3	-48.194
1141.2	-48.2754
1142.1	-48.1567
1143	-48.211
1143.9	-48.2381
1144.8	-48.2279
1145.7	-48.133
1146.6	-48.0855
1147.5	-48.1228
1148.4	-48.1466
1149.3	-48.1737
1150.2	-48.211
1151.1	-48.1567
1152	-48.1771
1152.9	-48.1534
1153.8	-48.1635
1154.7	-48.1906
1155.6	-48.2279
1156.5	-48.2991
1157.4	-48.3364
1158.3	-48.2686
1159.2	-48.2008
1160.1	-48.2008
1161	-48.2144
1161.9	-48.1906
1162.8	-48.2585
1163.7	-48.2788
1164.6	-48.3093
1165.5	-48.2585
1166.4	-48.2144
1167.3	-48.2008
1168.2	-48.2551
1169.1	-48.2788
1170	-48.2924
1170.9	-48.2991
1171.8	-48.2754
1172.7	-48.2313
1173.6	-48.2415
1174.5	-48.2585
1175.4	-48.2381
1176.3	-48.3025
1177.2	-48.289
1178.1	-48.2788
1179	-48.2415
1179.9	-48.2381
1180.8	-48.2178
1181.7	-48.2551
1182.6	-48.2178
1183.5	-48.289
1184.4	-48.3263
1185.3	-48.2924
1186.2	-48.211
1187.1	-48.2042
1188	-48.2347
1188.9	-48.2279
1189.8	-48.2347
1190.7	-48.2991
1191.6	-48.2822
1192.5	-48.1873
1193.4	-48.1432
1194.3	-48.1432
1195.2	-48.1805
1196.1	-48.2483
1197	-48.2958
1197.9	-48.2585
1198.8	-48.2178
1199.7	-48.2008
1200.6	-48.2313
1201.5	-48.2212
1202.4	-48.2958
1203.3	-48.2958
1204.2	-48.3568
1205.1	-48.3025
1206	-48.1873
1206.9	-48.2042
1207.8	-48.2788
1208.7	-48.2619
1209.6	-48.2551
1210.5	-48.2313
1211.4	-48.2178
1212.3	-48.1737
1213.2	-48.1432
1214.1	-48.1093
1215	-48.1466
1215.9	-48.2279
1216.8	-48.2754
1217.7	-48.2788
1218.6	-48.2517
1219.5	-48.2178
1220.4	-48.2144
1221.3	-48.2449
1222.2	-48.2042
1223.1	-48.2822
1224	-48.3738
1224.9	-48.35
1225.8	-48.2313
1226.7	-48.1737
1227.6	-48.1873
1228.5	-48.211
1229.4	-48.2449
1230.3	-48.2619
1231.2	-48.2585
1232.1	-48.272
1233	-48.2415
1233.9	-48.211
1234.8	-48.211
1235.7	-48.2652
1236.6	-48.3297
1237.5	-48.3263
1238.4	-48.2856
1239.3	-48.2246
1240.2	-48.2686
1241.1	-48.3059
1242	-48.2517
1242.9	-48.2754
1243.8	-48.2788
1244.7	-48.2856
1245.6	-48.2313
1246.5	-48.1635
1247.4	-48.1771
1248.3	-48.194
1249.2	-48.2279
1250.1	-48.2381
1251	-48.2381
1251.9	-48.2212
1252.8	-48.2076
1253.7	-48.1669
1254.6	-48.1805
1255.5	-48.2279
1256.4	-48.2619
1257.3	-48.3195
1258.2	-48.2822
1259.1	-48.2246
1260	-48.1737
1260.9	-48.1466
1261.8	-48.1534
1262.7	-48.1262
1263.6	-48.2076
1264.5	-48.2313
1265.4	-48.1873
1266.3	-48.1161
1267.2	-48.1262
1268.1	-48.1805
1269	-48.2008
1269.9	-48.2178
1270.8	-48.2178
1271.7	-48.211
1272.6	-48.1296
1273.5	-48.1364
1274.4	-48.1635
1275.3	-48.1669
1276.2	-48.2178
1277.1	-48.2619
1278	-48.211
1278.9	-48.1601
1279.8	-48.1669
1280.7	-48.1703
1281.6	-48.1432
1282.5	-48.2212
1283.4	-48.2076
1284.3	-48.2449
1285.2	-48.1805
1286.1	-48.0821
1287	-48.0618
1287.9	-48.1296
1288.8	-48.1296
1289.7	-48.1262
1290.6	-48.2076
1291.5	-48.1805
1292.4	-48.0923
1293.3	-48.055
1294.2	-48.0109
1295.1	-48.0584
1296	-48.1364
1296.9	-48.1669
1297.8	-48.1296
1298.7	-48.1466
1299.6	-48.1194
1300.5	-48.0889
1301.4	-48.1398
1302.3	-48.0821
1303.2	-48.1873
1304.1	-48.2212
1305	-48.2279
1305.9	-48.1127
1306.8	-48.1059
1307.7	-48.1873
1308.6	-48.1635
1309.5	-48.1534
1310.4	-48.1466
1311.3	-48.1296
1312.2	-48.1228
1313.1	-48.1059
1314	-48.0686
1314.9	-48.1025
1315.8	-48.1805
1316.7	-48.2517
1317.6	-48.2686
1318.5	-48.1839
1319.4	-48.1364
1320.3	-48.1669
1321.2	-48.1466
1322.1	-48.1805
1323	-48.2008
1323.9	-48.3059
1324.8	-48.3127
1325.7	-48.194
1326.6	-48.1161
1327.5	-48.1127
1328.4	-48.1262
1329.3	-48.1669
1330.2	-48.1906
1331.1	-48.1703
1332	-48.1703
1332.9	-48.1398
1333.8	-48.1601
1334.7	-48.1534
1335.6	-48.2212
1336.5	-48.289
1337.4	-48.3398
1338.3	-48.2788
1339.2	-48.2619
1340.1	-48.2313
1341	-48.3331
1341.9	-48.2788
1342.8	-48.2991
1343.7	-48.3263
1344.6	-48.3263
1345.5	-48.2483
1346.4	-48.1737
1347.3	-48.1567
1348.2	-48.2246
1349.1	-48.2517
1350	-48.2415
1350.9	-48.2279
1351.8	-48.2178
1352.7	-48.1567
1353.6	-48.133
1354.5	-48.0923
1355.4	-48.15
1356.3	-48.2381
1357.2	-48.2822
1358.1	-48.289
1359	-48.2042
1359.9	-48.1873
1360.8	-48.1534
1361.7	-48.1839
1362.6	-48.1669
1363.5	-48.2585
1364.4	-48.2856
1365.3	-48.2279
1366.2	-48.1432
1367.1	-48.1262
1368	-48.1432
1368.9	-48.1601
1369.8	-48.1703
1370.7	-48.194
1371.6	-48.1432
1372.5	-48.1432
1373.4	-48.0991
1374.3	-48.1194
1375.2	-48.0991
1376.1	-48.1771
1377	-48.2076
1377.9	-48.1703
1378.8	-48.1228
1379.7	-48.1093
1380.6	-48.1194
1381.5	-48.1194
1382.4	-48.1737
1383.3	-48.1839
1384.2	-48.2279
1385.1	-48.1873
1386	-48.1296
1386.9	-48.1059
1387.8	-48.1466
1388.7	-48.1906
1389.6	-48.1839
1390.5	-48.2008
1391.4	-48.2347
1392.3	-48.1127
1393.2	-48.1194
1394.1	-48.0584
1395	-48.0991
1395.9	-48.1567
1396.8	-48.1839
1397.7	-48.1839
1398.6	-48.1601
1399.5	-48.1296
1400.4	-48.0991
1401.3	-48.15
1402.2	-48.1059
1403.1	-48.1805
1404	-48.2212
1404.9	-48.2347
1405.8	-48.15
1406.7	-48.0652
1407.6	-48.1228
1408.5	-48.1296
1409.4	-48.1228
1410.3	-48.1262
1411.2	-48.0957
1412.1	-48.0889
1413	-48.055
1413.9	-48.0211
1414.8	-48.0414
1415.7	-48.1194
1416.6	-48.1906
1417.5	-48.1873
1418.4	-48.2042
1419.3	-48.1161
1420.2	-48.15
1421.1	-48.1398
1422	-48.1771
1422.9	-48.1839
1423.8	-48.2449
1424.7	-48.2551
1425.6	-48.1398
1426.5	-48.0618
1427.4	-48.0889
1428.3	-48.0889
1429.2	-48.1127
1430.1	-48.1262
1431	-48.1228
1431.9	-48.1161
1432.8	-48.0855
1433.7	-48.0414
1434.6	-48.0347
1435.5	-48.0889
1436.4	-48.1432
1437.3	-48.1703
1438.2	-48.133
1439.1	-48.055
1440	-48.0414
1440.9	-48.1025
1441.8	-48.0652
1442.7	-48.0923
1443.6	-48.0923
1444.5	-48.1262
1445.4	-48.0923
1446.3	-48.0177
1447.2	-48.0042
1448.1	-48.0313
1449	-48.0414
1449.9	-48.0754
1450.8	-48.1025
1451.7	-48.0652
1452.6	-48.0889
1453.5	-48.0414
1454.4	-48.0245
1455.3	-48.0821
1456.2	-48.1296
1457.1	-48.1601
1458	-48.1635
1458.9	-48.0652
1459.8	-48.0414
1460.7	-47.9906
1461.6	-47.9736
1462.5	-48.0008
1463.4	-47.9974
1464.3	-48.0143
1465.2	-47.994
1466.1	-47.9092
1467	-47.855
1467.9	-47.9058
1468.8	-47.9567
1469.7	-47.9736
1470.6	-47.9804
1471.5	-48.0042
1472.4	-47.9567
1473.3	-47.916
1474.2	-47.9465
1475.1	-47.9431
1476	-47.9872
1476.9	-48.0177
1477.8	-48.0245
1478.7	-47.9906
1479.6	-47.977
1480.5	-47.9499
1481.4	-47.9804
1482.3	-47.9635
1483.2	-48.0414
1484.1	-48.0754
1485	-48.0414
1485.9	-47.977
1486.8	-47.9397
1487.7	-47.9465
1488.6	-47.9872
1489.5	-47.9872
1490.4	-48.0313
1491.3	-48.072
1492.2	-47.9431
1493.1	-47.9465
1494	-47.9228
1494.9	-47.9465
1495.8	-47.977
1496.7	-48.0177
1497.6	-48.0245
1498.5	-48.0109
1499.4	-47.9974
1500.3	-47.9804
1501.2	-48.0109
1502.1	-47.9736
1503	-48.0143
1503.9	-48.0618
1504.8	-48.0821
1505.7	-48.0008
1506.6	-47.9431
1507.5	-47.994
1508.4	-48.0245
1509.3	-48.0143
1510.2	-48.0075
1511.1	-47.994
1512	-48.0245
1512.9	-48.0143
1513.8	-47.9567
1514.7	-47.9635
1515.6	-48.0211
1516.5	-48.0821
1517.4	-48.0821
1518.3	-48.055
1519.2	-48.0143
1520.1	-48.0279
1521	-48.0414
1521.9	-48.0821
1522.8	-48.072
1523.7	-48.1262
1524.6	-48.194
1525.5	-48.0889
1526.4	-47.9838
1527.3	-47.9702
1528.2	-47.994
1529.1	-48.0279
1530	-48.0652
1530.9	-48.0177
1531.8	-48.0381
1532.7	-48.0042
1533.6	-47.9567
1534.5	-47.9295
1535.4	-47.9974
1536.3	-48.0414
1537.2	-48.0686
1538.1	-48.0245
1539	-47.9736
1539.9	-47.9533
1540.8	-48.0448
1541.7	-48.0245
1542.6	-48.0109
1543.5	-48.0313
1544.4	-48.0279
1545.3	-47.9974
1546.2	-47.9228
1547.1	-47.9329
1548	-47.9567
1548.9	-47.994
1549.8	-48.0279
1550.7	-48.0652
1551.6	-48.0381
1552.5	-48.0754
1553.4	-48.0177
1554.3	-47.9906
1555.2	-48.0618
1556.1	-48.1025
1557	-48.1635
1557.9	-48.1669
1558.8	-48.0855
1559.7	-48.055
1560.6	-48.0516
1561.5	-48.0448
1562.4	-48.0618
1563.3	-48.0821
1564.2	-48.1194
1565.1	-48.133
1566	-48.0652
1566.9	-48.0414
1567.8	-48.0686
1568.7	-48.0754
1569.6	-48.1093
1570.5	-48.1059
1571.4	-48.1364
1572.3	-48.0787
1573.2	-48.0686
1574.1	-48.0754
1575	-48.0855
1575.9	-48.1262
1576.8	-48.1466
1577.7	-48.1364
1578.6	-48.0957
1579.5	-48.0618
1580.4	-48.0652
1581.3	-48.0957
1582.2	-48.0584
1583.1	-48.1161
1584	-48.1635
1584.9	-48.1737
1585.8	-48.1364
1586.7	-48.0855
1587.6	-48.1296
1588.5	-48.1805
1589.4	-48.1601
1590.3	-48.2212
1591.2	-48.2517
1592.1	-48.1567
1593	-48.133
1593.9	-48.0991
1594.8	-48.1228
1595.7	-48.1703
1596.6	-48.2415
1597.5	-48.2076
1598.4	-48.2246
1599.3	-48.1737
1600.2	-48.1737
1601.1	-48.1567
1602	-48.2076
1602.9	-48.1974
1603.8	-48.2619
1604.7	-48.2822
1605.6	-48.2279
1606.5	-48.1466
1607.4	-48.2144
1608.3	-48.2483
1609.2	-48.211
1610.1	-48.2212
1611	-48.1974
1611.9	-48.1974
1612.8	-48.1601
1613.7	-48.1194
1614.6	-48.1194
1615.5	-48.1669
1616.4	-48.2381
1617.3	-48.2381
1618.2	-48.1873
1619.1	-48.1601
1620	-48.1635
1620.9	-48.1873
1621.8	-48.1805
1622.7	-48.1771
1623.6	-48.2279
1624.5	-48.2754
1625.4	-48.1974
1626.3	-48.0754
1627.2	-48.0923
1628.1	-48.0787
1629	-48.0923
1629.9	-48.1262
1630.8	-48.1567
1631.7	-48.1262
1632.6	-48.1635
1633.5	-48.0787
1634.4	-48.0855
1635.3	-48.1127
1636.2	-48.1906
1637.1	-48.2144
1638	-48.2008
1638.9	-48.15
1639.8	-48.1398
1640.7	-48.1839
1641.6	-48.2246
1642.5	-48.2347
1643.4	-48.2246
1644.3	-48.2246
1645.2	-48.2246
1646.1	-48.1669
1647	-48.1737
1647.9	-48.2042
1648.8	-48.2483
1649.7	-48.2822
1650.6	-48.2619
1651.5	-48.2483
1652.4	-48.2246
1653.3	-48.2008
1654.2	-48.1805
1655.1	-48.2347
1656	-48.272
1656.9	-48.3161
1657.8	-48.3839
1658.7	-48.2754
1659.6	-48.2517
1660.5	-48.211
1661.4	-48.2551
1662.3	-48.194
1663.2	-48.2449
1664.1	-48.2754
1665	-48.289
1665.9	-48.2212
1666.8	-48.1974
1667.7	-48.194
1668.6	-48.2551
1669.5	-48.2449
1670.4	-48.2585
1671.3	-48.2958
1672.2	-48.1974
1673.1	-48.1906
1674	-48.1906
1674.9	-48.211
1675.8	-48.1906
1676.7	-48.2585
1677.6	-48.2415
1678.5	-48.2076
1679.4	-48.1839
1680.3	-48.1771
1681.2	-48.1906
1682.1	-48.1737
1683	-48.1974
1683.9	-48.211
1684.8	-48.2279
1685.7	-48.1567
1686.6	-48.0889
1687.5	-48.0754
1688.4	-48.1534
1689.3	-48.1432
1690.2	-48.1534
1691.1	-48.2008
1692	-48.1974
1692.9	-48.1398
1693.8	-48.0991
1694.7	-48.0957
1695.6	-48.194
1696.5	-48.2313
1697.4	-48.2415
1698.3	-48.2144
1699.2	-48.194
1700.1	-48.194
1701	-48.1873
1701.9	-48.2551
1702.8	-48.2313
1703.7	-48.2822
1704.6	-48.3025
1705.5	-48.2144
1706.4	-48.1466
1707.3	-48.1669
1708.2	-48.2381
1709.1	-48.1906
1710	-48.211
1710.9	-48.2042
1711.8	-48.2246
1712.7	-48.1839
1713.6	-48.1364
1714.5	-48.133
1715.4	-48.1805
1716.3	-48.2449
1717.2	-48.272
1718.1	-48.2585
1719	-48.2042
1719.9	-48.1771
1720.8	-48.2008
1721.7	-48.2144
1722.6	-48.2246
1723.5	-48.2449
1724.4	-48.2856
1725.3	-48.2144
1726.2	-48.1466
1727.1	-48.1296
1728	-48.1262
1728.9	-48.1296
1729.8	-48.1567
1730.7	-48.1737
1731.6	-48.1466
1732.5	-48.2008
1733.4	-48.1601
1734.3	-48.1534
1735.2	-48.2246
1736.1	-48.3161
1737	-48.3839
1737.9	-48.3975
1738.8	-48.3229
1739.7	-48.2551
1740.6	-48.3059
1741.5	-48.3093
1742.4	-48.3161
1743.3	-48.3161
1744.2	-48.3229
1745.1	-48.3093
1746	-48.2313
1746.9	-48.2347
1747.8	-48.2178
1748.7	-48.2551
1749.6	-48.2619
1750.5	-48.272
1751.4	-48.2449
1752.3	-48.2483
1753.2	-48.1974
1754.1	-48.1364
1755	-48.1703
1755.9	-48.2347
1756.8	-48.289
1757.7	-48.3093
1758.6	-48.2415
1759.5	-48.1873
1760.4	-48.1737
1761.3	-48.1805
1762.2	-48.1805
1763.1	-48.1906
1764	-48.2381
1764.9	-48.2415
1765.8	-48.1669
1766.7	-48.1364
1767.6	-48.1669
1768.5	-48.1771
1769.4	-48.2449
1770.3	-48.2212
1771.2	-48.2517
1772.1	-48.1839
1773	-48.1567
1773.9	-48.133
1774.8	-48.1839
1775.7	-48.211
1776.6	-48.2279
1777.5	-48.1873
1778.4	-48.1601
1779.3	-48.1635
1780.2	-48.1635
1781.1	-48.2008
1782	-48.2008
1782.9	-48.2483
1783.8	-48.2822
1784.7	-48.2924
1785.6	-48.2483
1786.5	-48.1635
1787.4	-48.2144
1788.3	-48.2212
1789.2	-48.1805
1790.1	-48.2212
1791	-48.2788
1791.9	-48.2517
1792.8	-48.2483
1793.7	-48.1906
1794.6	-48.1873
1795.5	-48.2415
1796.4	-48.3161
1797.3	-48.2991
1798.2	-48.2924
[truncated: 886,890+ more rows]

## Sheet: Figure 4 D ii
ACSF	2-APB	ACSF
-50.48	-61.22	-58.04
-58.5	-64.24	-51.48
-44.65	-62.08	-51.48
-54.41	-64.4	-59.51
-46.29	-58.81	-54.54
-50.59	-59.94	-55.31
-48.28	-54.08	-49.04
-47.52	-53.86	-49.74
-51.09	-58.65	-52
-47.91	-55.39	-46.84
