# Supplementary material for: The cation channel mechanisms of subthreshold inward depolarizing currents in the mice VTA dopaminergic neurons and their roles in the chronic-stress-induced depression-like behavior
Source: eLife. 2024 Dec 6;12:RP88319. doi: 10.7554/eLife.88319 (PMC11623934; doi:10.7554/eLife.88319)
Supplement: Figure 4—source data 6. [file elife-88319-fig4-data6.xlsx]

## Sheet: Figure 4 E i
Time(ms)	RMP(mV)
0	-53.2423
1.4	-53.2532
2.8	-53.2597
4.2	-53.2423
5.6	-53.227
7	-53.2357
8.4	-53.3055
9.8	-53.3098
11.2	-53.2423
12.6	-53.2662
14	-53.3098
15.4	-53.3164
16.8	-53.36
18.2	-53.3382
19.6	-53.2815
21	-53.3665
22.4	-53.4297
23.8	-53.4058
25.2	-53.3796
26.6	-53.3622
28	-53.3622
29.4	-53.4058
30.8	-53.3142
32.2	-53.251
33.6	-53.2924
35	-53.2662
36.4	-53.2532
37.8	-53.1856
39.2	-53.1529
40.6	-53.2336
42	-53.3033
43.4	-53.2728
44.8	-53.2336
46.2	-53.2532
47.6	-53.3077
49	-53.4079
50.4	-53.3687
51.8	-53.2793
53.2	-53.2902
54.6	-53.2924
56	-53.2662
57.4	-53.2052
58.8	-53.1224
60.2	-53.1398
61.6	-53.2619
63	-53.2989
64.4	-53.2445
65.8	-53.2662
67.2	-53.2793
68.6	-53.2771
70	-53.2445
71.4	-53.1638
72.8	-53.1398
74.2	-53.1769
75.6	-53.1834
77	-53.1616
78.4	-53.0788
79.8	-53.0875
81.2	-53.2074
82.6	-53.2706
84	-53.2118
85.4	-53.1812
86.8	-53.2183
88.2	-53.2488
89.6	-53.2728
91	-53.1987
92.4	-53.1725
93.8	-53.2488
95.2	-53.2728
96.6	-53.2488
98	-53.2118
99.4	-53.1812
100.8	-53.2379
102.2	-53.3011
103.6	-53.2771
105	-53.2989
106.4	-53.3317
107.8	-53.3687
109.2	-53.4036
110.6	-53.3644
112	-53.2815
113.4	-53.3491
114.8	-53.3731
116.2	-53.3709
117.6	-53.3098
119	-53.2401
120.4	-53.2728
121.8	-53.3142
123.2	-53.2466
124.6	-53.2009
126	-53.1834
127.4	-53.2074
128.8	-53.275
130.2	-53.1725
131.6	-53.0112
133	-53.0483
134.4	-53.0504
135.8	-53.0897
137.2	-53.0788
138.6	-53.0701
140	-53.105
141.4	-53.275
142.8	-53.3142
144.2	-53.2575
145.6	-53.251
147	-53.2902
148.4	-53.3578
149.8	-53.4014
151.2	-53.2815
152.6	-53.2532
154	-53.2684
155.4	-53.251
156.8	-53.2357
158.2	-53.1921
159.6	-53.203
161	-53.2771
162.4	-53.3251
163.8	-53.2837
165.2	-53.2532
166.6	-53.2837
168	-53.3229
169.4	-53.4145
170.8	-53.3273
172.2	-53.2553
173.6	-53.288
175	-53.2641
176.4	-53.2466
177.8	-53.2183
179.2	-53.1529
180.6	-53.2161
182	-53.2989
183.4	-53.2553
184.8	-53.1965
186.2	-53.2052
187.6	-53.2227
189	-53.2553
190.4	-53.2292
191.8	-53.1485
193.2	-53.1834
194.6	-53.203
196	-53.2096
197.4	-53.1529
198.8	-53.1355
200.2	-53.1682
201.6	-53.2379
203	-53.2401
204.4	-53.2357
205.8	-53.2161
207.2	-53.2423
208.6	-53.251
210	-53.2205
211.4	-53.1398
212.8	-53.1289
214.2	-53.1725
215.6	-53.1573
217	-53.1551
218.4	-53.118
219.8	-53.0592
221.2	-53.1289
222.6	-53.1246
224	-53.1333
225.4	-53.1398
226.8	-53.1311
228.2	-53.1725
229.6	-53.2118
231	-53.1224
232.4	-53.1028
233.8	-53.1791
235.2	-53.1682
236.6	-53.1747
238	-53.118
239.4	-53.0788
240.8	-53.1398
242.2	-53.1965
243.6	-53.19
245	-53.2248
246.4	-53.2662
247.8	-53.3426
249.2	-53.4058
250.6	-53.36
252	-53.3251
253.4	-53.3207
254.8	-53.3207
256.2	-53.3338
257.6	-53.2968
259	-53.2662
260.4	-53.3077
261.8	-53.4297
263.2	-53.4341
264.6	-53.3665
266	-53.3883
267.4	-53.445
268.8	-53.4276
270.2	-53.3796
271.6	-53.2968
273	-53.3317
274.4	-53.3752
275.8	-53.3949
277.2	-53.3927
278.6	-53.3426
280	-53.3251
281.4	-53.4101
282.8	-53.4254
284.2	-53.4036
285.6	-53.4145
287	-53.4581
288.4	-53.5082
289.8	-53.5344
291.2	-53.4319
292.6	-53.3578
294	-53.4167
295.4	-53.3665
296.8	-53.336
298.2	-53.2924
299.6	-53.2706
301	-53.3447
302.4	-53.3927
303.8	-53.3556
305.2	-53.3338
306.6	-53.3338
308	-53.3644
309.4	-53.384
310.8	-53.3207
312.2	-53.2859
313.6	-53.3142
315	-53.275
316.4	-53.2684
317.8	-53.1943
319.2	-53.2292
320.6	-53.275
322	-53.3556
323.4	-53.3273
324.8	-53.312
326.2	-53.3251
327.6	-53.336
329	-53.3491
330.4	-53.3164
331.8	-53.1987
333.2	-53.2445
334.6	-53.2423
336	-53.2379
337.4	-53.2292
338.8	-53.203
340.2	-53.2096
341.6	-53.3077
343	-53.3011
344.4	-53.2924
345.8	-53.2989
347.2	-53.2989
348.6	-53.3098
350	-53.3535
351.4	-53.2357
352.8	-53.2096
354.2	-53.2292
355.6	-53.2379
357	-53.227
358.4	-53.2118
359.8	-53.1507
361.2	-53.2641
362.6	-53.2946
364	-53.275
365.4	-53.2597
366.8	-53.3622
368.2	-53.421
369.6	-53.4603
371	-53.3905
372.4	-53.3469
373.8	-53.3796
375.2	-53.3774
376.6	-53.3622
378	-53.3229
379.4	-53.2793
380.8	-53.3164
382.2	-53.3644
383.6	-53.3905
385	-53.4058
386.4	-53.4145
387.8	-53.4079
389.2	-53.4341
390.6	-53.3905
392	-53.2815
393.4	-53.2597
394.8	-53.2728
396.2	-53.2706
397.6	-53.2379
399	-53.1812
400.4	-53.2139
401.8	-53.288
403.2	-53.2902
404.6	-53.275
406	-53.2619
407.4	-53.2793
408.8	-53.3077
410.2	-53.2684
411.6	-53.1682
413	-53.2205
414.4	-53.2445
415.8	-53.2619
417.2	-53.2597
418.6	-53.2096
420	-53.1682
421.4	-53.2205
422.8	-53.2423
424.2	-53.251
425.6	-53.251
427	-53.2423
428.4	-53.2597
429.8	-53.2575
431.2	-53.1398
432.6	-53.142
434	-53.1594
435.4	-53.166
436.8	-53.166
438.2	-53.1267
439.6	-53.0962
441	-53.1791
442.4	-53.2357
443.8	-53.2074
445.2	-53.1878
446.6	-53.1791
448	-53.2205
449.4	-53.2793
450.8	-53.1921
452.2	-53.1289
453.6	-53.1333
455	-53.1594
456.4	-53.1616
457.8	-53.1616
459.2	-53.0853
460.6	-53.1725
462	-53.3426
463.4	-53.397
464.8	-53.4036
466.2	-53.4646
467.6	-53.4864
469	-53.5038
470.4	-53.4821
471.8	-53.3861
473.2	-53.3883
474.6	-53.4101
476	-53.3905
477.4	-53.3709
478.8	-53.3033
480.2	-53.3273
481.6	-53.4079
483	-53.4254
484.4	-53.4167
485.8	-53.4188
487.2	-53.4167
488.6	-53.4472
490	-53.4297
491.4	-53.3513
492.8	-53.2902
494.2	-53.3164
495.6	-53.3186
497	-53.275
498.4	-53.2597
499.8	-53.2837
501.2	-53.3752
502.6	-53.4297
504	-53.397
505.4	-53.3796
506.8	-53.3905
508.2	-53.3927
509.6	-53.384
511	-53.2684
512.4	-53.2118
513.8	-53.2423
515.2	-53.2488
516.6	-53.2575
518	-53.1878
519.4	-53.1442
520.8	-53.1725
522.2	-53.2357
523.6	-53.1987
525	-53.1747
526.4	-53.1769
527.8	-53.19
529.2	-53.2183
530.6	-53.1725
532	-53.0657
533.4	-53.1093
534.8	-53.0832
536.2	-53.0548
537.6	-52.9872
539	-52.9262
540.4	-52.9589
541.8	-53.0766
543.2	-53.0483
544.6	-53.0243
546	-53.0069
547.4	-53.0526
548.8	-53.1398
550.2	-53.1725
551.6	-53.1093
553	-53.1246
554.4	-53.1725
555.8	-53.1747
557.2	-53.1442
558.6	-53.1115
560	-53.105
561.4	-53.2292
562.8	-53.2706
564.2	-53.2423
565.6	-53.2401
567	-53.2662
568.4	-53.2902
569.8	-53.3382
571.2	-53.2619
572.6	-53.2009
574	-53.1943
575.4	-53.2009
576.8	-53.1987
578.2	-53.166
579.6	-53.1267
581	-53.1943
582.4	-53.2292
583.8	-53.2248
585.2	-53.1878
586.6	-53.1943
588	-53.1921
589.4	-53.275
590.8	-53.2379
592.2	-53.1878
593.6	-53.2488
595	-53.275
596.4	-53.2423
597.8	-53.2009
599.2	-53.1769
600.6	-53.2314
602	-53.2837
603.4	-53.2401
604.8	-53.1812
606.2	-53.1485
607.6	-53.1703
609	-53.2161
610.4	-53.19
611.8	-53.0941
613.2	-53.1137
614.6	-53.1137
616	-53.1573
617.4	-53.1551
618.8	-53.1355
620.2	-53.1682
621.6	-53.2859
623	-53.2815
624.4	-53.288
625.8	-53.2837
627.2	-53.2924
628.6	-53.2924
630	-53.3426
631.4	-53.2553
632.8	-53.251
634.2	-53.2575
635.6	-53.1878
637	-53.1289
638.4	-53.081
639.8	-53.0832
641.2	-53.1355
642.6	-53.1747
644	-53.1464
645.4	-53.142
646.8	-53.1638
648.2	-53.19
649.6	-53.2597
651	-53.1616
652.4	-53.1158
653.8	-53.1333
655.2	-53.1115
656.6	-53.0897
658	-53.0613
659.4	-53.0199
660.8	-53.0744
662.2	-53.1485
663.6	-53.118
665	-53.1137
666.4	-53.1289
667.8	-53.142
669.2	-53.1965
670.6	-53.1573
672	-53.0832
673.4	-53.1071
674.8	-53.1703
676.2	-53.166
677.6	-53.1267
679	-53.105
680.4	-53.1485
681.8	-53.2139
683.2	-53.2401
684.6	-53.2641
686	-53.2728
687.4	-53.2989
688.8	-53.3709
690.2	-53.3469
691.6	-53.2553
693	-53.203
694.4	-53.2074
695.8	-53.2052
697.2	-53.19
698.6	-53.1246
700	-53.1028
701.4	-53.1943
702.8	-53.2314
704.2	-53.2052
705.6	-53.166
707	-53.2009
708.4	-53.2728
709.8	-53.3186
711.2	-53.2575
712.6	-53.1987
714	-53.2401
715.4	-53.2401
716.8	-53.2183
718.2	-53.1769
719.6	-53.1507
721	-53.2248
722.4	-53.2728
723.8	-53.2314
725.2	-53.2052
726.6	-53.2488
728	-53.3011
729.4	-53.3295
730.8	-53.288
732.2	-53.2227
733.6	-53.2205
735	-53.1965
736.4	-53.203
737.8	-53.1943
739.2	-53.1529
740.6	-53.1856
742	-53.2684
743.4	-53.2248
744.8	-53.2248
746.2	-53.2205
747.6	-53.2445
749	-53.2728
750.4	-53.2946
751.8	-53.1791
753.2	-53.2227
754.6	-53.2641
756	-53.2662
757.4	-53.2488
758.8	-53.2314
760.2	-53.203
761.6	-53.2968
763	-53.312
764.4	-53.2401
765.8	-53.2183
767.2	-53.3055
768.6	-53.3578
770	-53.4058
771.4	-53.312
772.8	-53.2597
774.2	-53.275
775.6	-53.2771
777	-53.2292
778.4	-53.1725
779.8	-53.1311
781.2	-53.2771
782.6	-53.3229
784	-53.2968
785.4	-53.2488
786.8	-53.275
788.2	-53.3098
789.6	-53.3295
791	-53.2423
792.4	-53.2118
793.8	-53.2292
795.2	-53.2815
796.6	-53.2205
798	-53.1878
799.4	-53.1028
800.8	-53.1464
802.2	-53.2096
803.6	-53.2139
805	-53.2009
806.4	-53.2096
807.8	-53.2096
809.2	-53.2597
810.6	-53.2379
812	-53.1507
813.4	-53.1246
814.8	-53.1834
816.2	-53.1725
817.6	-53.203
819	-53.1529
820.4	-53.1158
821.8	-53.1616
823.2	-53.1616
824.6	-53.1355
826	-53.1071
827.4	-53.1355
828.8	-53.2009
830.2	-53.2314
831.6	-53.1464
833	-53.1638
834.4	-53.1987
835.8	-53.2074
837.2	-53.1965
838.6	-53.1638
840	-53.1224
841.4	-53.2488
842.8	-53.2859
844.2	-53.2641
845.6	-53.2641
847	-53.3077
848.4	-53.3447
849.8	-53.4232
851.2	-53.3186
852.6	-53.2771
854	-53.2989
855.4	-53.3229
856.8	-53.3186
858.2	-53.3077
859.6	-53.2183
861	-53.2989
862.4	-53.336
863.8	-53.3011
865.2	-53.2401
866.6	-53.2401
868	-53.2488
869.4	-53.3317
870.8	-53.3077
872.2	-53.2161
873.6	-53.1878
875	-53.2118
876.4	-53.19
877.8	-53.1965
879.2	-53.1551
880.6	-53.203
882	-53.2837
883.4	-53.3426
884.8	-53.2597
886.2	-53.2902
887.6	-53.2815
889	-53.3229
890.4	-53.3207
891.8	-53.2052
893.2	-53.1725
894.6	-53.2314
896	-53.2009
897.4	-53.19
898.8	-53.1246
900.2	-53.1158
901.6	-53.1791
903	-53.1921
904.4	-53.1747
905.8	-53.166
907.2	-53.2096
908.6	-53.2401
910	-53.275
911.4	-53.166
912.8	-53.142
914.2	-53.2118
915.6	-53.2205
917	-53.2227
918.4	-53.1529
919.8	-53.1093
921.2	-53.1878
922.6	-53.2466
924	-53.251
925.4	-53.1921
926.8	-53.2314
928.2	-53.2423
929.6	-53.3535
931	-53.2793
932.4	-53.2357
933.8	-53.2946
935.2	-53.3011
936.6	-53.2859
938	-53.2488
939.4	-53.1747
940.8	-53.2314
942.2	-53.3186
943.6	-53.2968
945	-53.2968
946.4	-53.3186
947.8	-53.3295
949.2	-53.3731
950.6	-53.3404
952	-53.2205
953.4	-53.2139
954.8	-53.2139
956.2	-53.2096
957.6	-53.1616
959	-53.0941
960.4	-53.081
961.8	-53.1573
963.2	-53.1573
964.6	-53.1158
966	-53.0832
967.4	-53.1442
968.8	-53.2009
970.2	-53.2248
971.6	-53.1573
973	-53.1442
974.4	-53.1747
975.8	-53.2183
977.2	-53.1507
978.6	-53.0744
980	-52.9763
981.4	-53.0374
982.8	-53.0679
984.2	-53.0679
985.6	-53.0744
987	-53.105
988.4	-53.1551
989.8	-53.2466
991.2	-53.203
992.6	-53.1791
994	-53.2139
995.4	-53.2793
996.8	-53.2423
998.2	-53.2662
999.6	-53.2314
1001	-53.2859
1002.4	-53.3229
1003.8	-53.3273
1005.2	-53.2924
1006.6	-53.3251
1008	-53.3861
1009.4	-53.4494
1010.8	-53.3404
1012.2	-53.2532
1013.6	-53.2641
1015	-53.336
1016.4	-53.3295
1017.8	-53.3317
1019.2	-53.2619
1020.6	-53.288
1022	-53.3752
1023.4	-53.3731
1024.8	-53.3404
1026.2	-53.3338
1027.6	-53.3491
1029	-53.3665
1030.4	-53.336
1031.8	-53.2205
1033.2	-53.2423
1034.6	-53.2837
1036	-53.288
1037.4	-53.2401
1038.8	-53.1965
1040.2	-53.2096
1041.6	-53.36
1043	-53.4188
1044.4	-53.3513
1045.8	-53.3317
1047.2	-53.3317
1048.6	-53.3752
1050	-53.4537
1051.4	-53.3687
1052.8	-53.3295
1054.2	-53.3447
1055.6	-53.3229
1057	-53.2968
1058.4	-53.2662
1059.8	-53.1725
1061.2	-53.227
1062.6	-53.2662
1064	-53.2641
1065.4	-53.2205
1066.8	-53.2837
1068.2	-53.2902
1069.6	-53.3556
1071	-53.312
1072.4	-53.2532
1073.8	-53.2074
1075.2	-53.2488
1076.6	-53.2336
1078	-53.1834
1079.4	-53.118
1080.8	-53.1747
1082.2	-53.2227
1083.6	-53.2379
1085	-53.1878
1086.4	-53.19
1087.8	-53.203
1089.2	-53.2553
1090.6	-53.2205
1092	-53.1878
1093.4	-53.2118
1094.8	-53.2684
1096.2	-53.2793
1097.6	-53.2728
1099	-53.2662
1100.4	-53.2815
1101.8	-53.3207
1103.2	-53.3142
1104.6	-53.2793
1106	-53.2968
1107.4	-53.3011
1108.8	-53.3229
1110.2	-53.3709
1111.6	-53.2902
1113	-53.2771
1114.4	-53.288
1115.8	-53.275
1117.2	-53.2597
1118.6	-53.2118
1120	-53.1812
1121.4	-53.227
1122.8	-53.2292
1124.2	-53.1529
1125.6	-53.1289
1127	-53.1442
1128.4	-53.166
1129.8	-53.2532
1131.2	-53.2227
1132.6	-53.1507
1134	-53.1834
1135.4	-53.142
1136.8	-53.1115
1138.2	-53.0679
1139.6	-52.9981
1141	-53.033
1142.4	-53.118
1143.8	-53.1202
1145.2	-53.0962
1146.6	-53.1115
1148	-53.1464
1149.4	-53.2183
1150.8	-53.2161
1152.2	-53.1093
1153.6	-53.105
1155	-53.1398
1156.4	-53.118
1157.8	-53.0788
1159.2	-53.0156
1160.6	-53.0439
1162	-53.1464
1163.4	-53.1791
1164.8	-53.1616
1166.2	-53.1289
1167.6	-53.1812
1169	-53.2336
1170.4	-53.2597
1171.8	-53.1769
1173.2	-53.142
1174.6	-53.1791
1176	-53.227
1177.4	-53.2445
1178.8	-53.2052
1180.2	-53.1943
1181.6	-53.2771
1183	-53.3578
1184.4	-53.3491
1185.8	-53.3098
1187.2	-53.2924
1188.6	-53.3556
1190	-53.4428
1191.4	-53.3883
1192.8	-53.3186
1194.2	-53.3011
1195.6	-53.2924
1197	-53.2793
1198.4	-53.2684
1199.8	-53.2139
1201.2	-53.2771
1202.6	-53.2728
1204	-53.2706
1205.4	-53.2771
1206.8	-53.3055
1208.2	-53.3382
1209.6	-53.4014
1211	-53.3709
1212.4	-53.2423
1213.8	-53.2771
1215.2	-53.3338
1216.6	-53.3752
1218	-53.336
1219.4	-53.2597
1220.8	-53.2445
1222.2	-53.2837
1223.6	-53.2793
1225	-53.2423
1226.4	-53.251
1227.8	-53.2968
1229.2	-53.3426
1230.6	-53.2989
1232	-53.2139
1233.4	-53.1834
1234.8	-53.19
1236.2	-53.1943
1237.6	-53.166
1239	-53.1267
1240.4	-53.1311
1241.8	-53.2314
1243.2	-53.3033
1244.6	-53.2619
1246	-53.2379
1247.4	-53.2488
1248.8	-53.2837
1250.2	-53.312
1251.6	-53.1769
1253	-53.1355
1254.4	-53.142
1255.8	-53.1311
1257.2	-53.1006
1258.6	-53.0722
1260	-53.0417
1261.4	-53.1333
1262.8	-53.1747
1264.2	-53.1747
1265.6	-53.1725
1267	-53.2336
1268.4	-53.2532
1269.8	-53.2924
1271.2	-53.2292
1272.6	-53.1725
1274	-53.1682
1275.4	-53.2248
1276.8	-53.2118
1278.2	-53.1791
1279.6	-53.0679
1281	-53.1246
1282.4	-53.2161
1283.8	-53.2946
1285.2	-53.2619
1286.6	-53.2641
1288	-53.2771
1289.4	-53.275
1290.8	-53.2183
1292.2	-53.1224
1293.6	-53.1006
1295	-53.1246
1296.4	-53.1006
1297.8	-53.0679
1299.2	-53.009
1300.6	-53.0177
1302	-53.1028
1303.4	-53.1442
1304.8	-53.1594
1306.2	-53.1507
1307.6	-53.1246
1309	-53.1921
1310.4	-53.2379
1311.8	-53.1573
1313.2	-53.118
1314.6	-53.1485
1316	-53.1965
1317.4	-53.2401
1318.8	-53.2052
1320.2	-53.2161
1321.6	-53.3142
1323	-53.3731
1324.4	-53.3491
1325.8	-53.3447
1327.2	-53.3949
1328.6	-53.4646
1330	-53.5256
1331.4	-53.4799
1332.8	-53.4406
1334.2	-53.5104
1335.6	-53.4646
1337	-53.4385
1338.4	-53.4058
1339.8	-53.3752
1341.2	-53.3992
1342.6	-53.4341
1344	-53.4079
1345.4	-53.3578
1346.8	-53.3317
1348.2	-53.3556
1349.6	-53.4079
1351	-53.3774
1352.4	-53.2815
1353.8	-53.2728
1355.2	-53.3033
1356.6	-53.2641
1358	-53.251
1359.4	-53.2139
1360.8	-53.2423
1362.2	-53.3033
1363.6	-53.2989
1365	-53.2532
1366.4	-53.2641
1367.8	-53.2771
1369.2	-53.2793
1370.6	-53.2793
1372	-53.2161
1373.4	-53.1594
1374.8	-53.203
1376.2	-53.1856
1377.6	-53.1573
1379	-53.0744
1380.4	-53.0395
1381.8	-53.1267
1383.2	-53.1747
1384.6	-53.1093
1386	-53.1246
1387.4	-53.1376
1388.8	-53.19
1390.2	-53.2161
1391.6	-53.1834
1393	-53.1507
1394.4	-53.2052
1395.8	-53.2336
1397.2	-53.2292
1398.6	-53.2248
1400	-53.1703
1401.4	-53.2336
1402.8	-53.3186
1404.2	-53.312
1405.6	-53.2662
1407	-53.2619
1408.4	-53.3011
1409.8	-53.3382
1411.2	-53.2684
1412.6	-53.1747
1414	-53.1856
1415.4	-53.2227
1416.8	-53.2379
1418.2	-53.1987
1419.6	-53.166
1421	-53.2118
1422.4	-53.2946
1423.8	-53.2837
1425.2	-53.2401
1426.6	-53.2401
1428	-53.2488
1429.4	-53.2859
1430.8	-53.2575
1432.2	-53.1507
1433.6	-53.1725
1435	-53.1507
1436.4	-53.1769
1437.8	-53.1573
1439.2	-53.142
1440.6	-53.142
1442	-53.2488
1443.4	-53.2859
1444.8	-53.2619
1446.2	-53.2924
1447.6	-53.3207
1449	-53.3426
1450.4	-53.4254
1451.8	-53.312
1453.2	-53.2423
1454.6	-53.2706
1456	-53.2401
1457.4	-53.2379
1458.8	-53.2096
1460.2	-53.1464
1461.6	-53.19
1463	-53.2728
1464.4	-53.2532
1465.8	-53.227
1467.2	-53.2968
1468.6	-53.275
1470	-53.3251
1471.4	-53.2968
1472.8	-53.2248
1474.2	-53.2662
1475.6	-53.3317
1477	-53.3142
1478.4	-53.251
1479.8	-53.1594
1481.2	-53.1856
1482.6	-53.2728
1484	-53.2532
1485.4	-53.2009
1486.8	-53.2118
1488.2	-53.2401
1489.6	-53.2488
1491	-53.2096
1492.4	-53.118
1493.8	-53.1638
1495.2	-53.1921
1496.6	-53.2292
1498	-53.2379
1499.4	-53.1529
1500.8	-53.2009
1502.2	-53.2859
1503.6	-53.3207
1505	-53.3142
1506.4	-53.3469
1507.8	-53.3752
1509.2	-53.4254
1510.6	-53.4058
1512	-53.336
1513.4	-53.3055
1514.8	-53.3404
1516.2	-53.3273
1517.6	-53.3011
1519	-53.2728
1520.4	-53.1856
1521.8	-53.2706
1523.2	-53.3382
1524.6	-53.2793
1526	-53.275
1527.4	-53.2466
1528.8	-53.288
1530.2	-53.312
1531.6	-53.2815
1533	-53.251
1534.4	-53.2706
1535.8	-53.2597
1537.2	-53.2619
1538.6	-53.2139
1540	-53.1551
1541.4	-53.1987
1542.8	-53.2902
1544.2	-53.2466
1545.6	-53.2445
1547	-53.2597
1548.4	-53.2968
1549.8	-53.3273
1551.2	-53.2771
1552.6	-53.1638
1554	-53.1638
1555.4	-53.1398
1556.8	-53.1355
1558.2	-53.1224
1559.6	-53.0701
1561	-53.1028
1562.4	-53.203
1563.8	-53.19
1565.2	-53.1616
1566.6	-53.1747
1568	-53.2118
1569.4	-53.2575
1570.8	-53.2292
1572.2	-53.1355
1573.6	-53.1093
1575	-53.1006
1576.4	-53.081
1577.8	-53.0461
1579.2	-52.9916
1580.6	-52.9654
1582	-53.0919
1583.4	-53.1987
1584.8	-53.1965
1586.2	-53.2292
1587.6	-53.251
1589	-53.2793
1590.4	-53.3077
1591.8	-53.2357
1593.2	-53.1725
1594.6	-53.2183
1596	-53.2139
1597.4	-53.2009
1598.8	-53.1573
1600.2	-53.1616
1601.6	-53.2532
1603	-53.3142
1604.4	-53.2859
1605.8	-53.2706
1607.2	-53.3207
1608.6	-53.3447
1610	-53.3752
1611.4	-53.3317
1612.8	-53.2292
1614.2	-53.2161
1615.6	-53.251
1617	-53.2771
1618.4	-53.2314
1619.8	-53.1878
1621.2	-53.203
1622.6	-53.312
1624	-53.2859
1625.4	-53.2423
1626.8	-53.2205
1628.2	-53.2445
1629.6	-53.3011
1631	-53.3077
1632.4	-53.275
1633.8	-53.3251
1635.2	-53.3207
1636.6	-53.2728
1638	-53.2575
1639.4	-53.19
1640.8	-53.1616
1642.2	-53.2532
1643.6	-53.2532
1645	-53.2139
1646.4	-53.2183
1647.8	-53.2379
1649.2	-53.288
1650.6	-53.3382
1652	-53.19
1653.4	-53.1355
1654.8	-53.1464
1656.2	-53.1529
1657.6	-53.1594
1659	-53.1028
1660.4	-53.0919
1661.8	-53.1682
1663.2	-53.2423
1664.6	-53.2227
1666	-53.19
1667.4	-53.2401
1668.8	-53.2532
1670.2	-53.3098
1671.6	-53.2532
1673	-53.2139
1674.4	-53.2488
1675.8	-53.2946
1677.2	-53.2859
1678.6	-53.2641
1680	-53.2118
1681.4	-53.2793
1682.8	-53.3426
1684.2	-53.3142
1685.6	-53.2336
1687	-53.2314
1688.4	-53.2815
1689.8	-53.3033
1691.2	-53.2575
1692.6	-53.1573
1694	-53.1703
1695.4	-53.2074
1696.8	-53.2118
1698.2	-53.2118
1699.6	-53.1464
1701	-53.1507
1702.4	-53.2336
1703.8	-53.2248
1705.2	-53.1965
1706.6	-53.1921
1708	-53.2292
1709.4	-53.2989
1710.8	-53.3207
1712.2	-53.251
1713.6	-53.2619
1715	-53.3055
1716.4	-53.3186
1717.8	-53.2771
1719.2	-53.2662
1720.6	-53.2183
1722	-53.3251
1723.4	-53.3491
1724.8	-53.3273
1726.2	-53.3011
1727.6	-53.3251
1729	-53.3644
1730.4	-53.4079
1731.8	-53.3796
1733.2	-53.3644
1734.6	-53.4036
1736	-53.3883
1737.4	-53.3731
1738.8	-53.3447
1740.2	-53.312
1741.6	-53.3949
1743	-53.4319
1744.4	-53.3535
1745.8	-53.3077
1747.2	-53.2989
1748.6	-53.3055
1750	-53.3644
1751.4	-53.2837
1752.8	-53.2096
1754.2	-53.2139
1755.6	-53.2248
1757	-53.2466
1758.4	-53.2052
1759.8	-53.1878
1761.2	-53.1965
1762.6	-53.3164
1764	-53.3186
1765.4	-53.3077
1766.8	-53.3404
1768.2	-53.3404
1769.6	-53.3818
1771	-53.3861
1772.4	-53.3142
1773.8	-53.3338
1775.2	-53.3731
1776.6	-53.3556
1778	-53.3033
1779.4	-53.2532
1780.8	-53.2423
1782.2	-53.3207
1783.6	-53.3731
1785	-53.3338
1786.4	-53.336
1787.8	-53.3338
1789.2	-53.3644
1790.6	-53.3644
1792	-53.2924
1793.4	-53.2662
1794.8	-53.2946
1796.2	-53.2924
1797.6	-53.2859
1799	-53.2641
1800.4	-53.2183
1801.8	-53.2205
1803.2	-53.288
1804.6	-53.2684
1806	-53.2553
1807.4	-53.251
1808.8	-53.3011
1810.2	-53.3317
1811.6	-53.2946
1813	-53.2205
1814.4	-53.2401
1815.8	-53.2532
1817.2	-53.2466
1818.6	-53.2139
1820	-53.1485
1821.4	-53.1573
1822.8	-53.2314
1824.2	-53.2052
1825.6	-53.1987
1827	-53.1573
1828.4	-53.2009
1829.8	-53.2248
1831.2	-53.251
1832.6	-53.1485
1834	-53.2139
1835.4	-53.2052
1836.8	-53.1878
1838.2	-53.1703
1839.6	-53.118
1841	-53.1246
1842.4	-53.227
1843.8	-53.2139
1845.2	-53.166
1846.6	-53.1551
1848	-53.1594
1849.4	-53.1682
1850.8	-53.2139
1852.2	-53.1115
1853.6	-53.0679
1855	-53.1071
1856.4	-53.0832
1857.8	-53.0635
1859.2	-53.0832
1860.6	-53.0352
1862	-53.1464
1863.4	-53.2139
1864.8	-53.2139
1866.2	-53.2052
1867.6	-53.2052
1869	-53.2052
1870.4	-53.2401
1871.8	-53.1812
1873.2	-53.1921
1874.6	-53.2445
1876	-53.2641
1877.4	-53.2575
1878.8	-53.1987
1880.2	-53.1442
1881.6	-53.2248
1883	-53.2488
1884.4	-53.2423
1885.8	-53.1703
1887.2	-53.1943
1888.6	-53.2009
1890	-53.288
1891.4	-53.2837
1892.8	-53.2139
1894.2	-53.2445
1895.6	-53.2575
1897	-53.2575
1898.4	-53.2314
1899.8	-53.2227
1901.2	-53.2662
1902.6	-53.3404
1904	-53.3338
1905.4	-53.336
1906.8	-53.312
1908.2	-53.3404
1909.6	-53.3687
1911	-53.3426
1912.4	-53.2423
1913.8	-53.2379
1915.2	-53.2292
1916.6	-53.2401
1918	-53.2161
1919.4	-53.1638
1920.8	-53.1878
1922.2	-53.2401
1923.6	-53.2466
1925	-53.2096
1926.4	-53.1987
1927.8	-53.1682
1929.2	-53.19
1930.6	-53.2314
1932	-53.1267
1933.4	-53.0919
1934.8	-53.1202
1936.2	-53.1115
1937.6	-53.0919
1939	-53.0526
1940.4	-53.0112
1941.8	-53.0832
1943.2	-53.1224
1944.6	-53.1093
1946	-53.0744
1947.4	-53.0962
1948.8	-53.142
1950.2	-53.2227
1951.6	-53.1507
1953	-53.0701
1954.4	-53.1093
1955.8	-53.1267
1957.2	-53.0984
1958.6	-53.0919
1960	-53.0395
1961.4	-53.0635
1962.8	-53.1333
1964.2	-53.1311
1965.6	-53.1246
1967	-53.1747
1968.4	-53.1769
1969.8	-53.251
1971.2	-53.2161
1972.6	-53.1115
1974	-53.1376
1975.4	-53.1965
1976.8	-53.1987
1978.2	-53.1376
1979.6	-53.0853
1981	-53.118
1982.4	-53.2314
1983.8	-53.2641
1985.2	-53.2248
1986.6	-53.2248
1988	-53.2357
1989.4	-53.3033
1990.8	-53.3491
1992.2	-53.2292
1993.6	-53.2336
1995	-53.2553
1996.4	-53.2553
1997.8	-53.2641
1999.2	-53.2314
2000.6	-53.203
2002	-53.2815
2003.4	-53.3426
2004.8	-53.3207
2006.2	-53.288
2007.6	-53.3077
2009	-53.3556
2010.4	-53.384
2011.8	-53.2968
2013.2	-53.2575
2014.6	-53.275
2016	-53.2684
2017.4	-53.2466
2018.8	-53.2161
2020.2	-53.1682
2021.6	-53.2314
2023	-53.275
2024.4	-53.2924
2025.8	-53.2728
2027.2	-53.3055
2028.6	-53.3426
2030	-53.3752
2031.4	-53.3883
2032.8	-53.3382
2034.2	-53.3796
2035.6	-53.3992
2037	-53.3818
2038.4	-53.3251
2039.8	-53.2684
2041.2	-53.2728
2042.6	-53.3513
2044	-53.3404
2045.4	-53.2859
2046.8	-53.2815
2048.2	-53.3317
2049.6	-53.3905
2051	-53.4123
2052.4	-53.3055
2053.8	-53.3098
2055.2	-53.3186
2056.6	-53.3295
2058	-53.3098
2059.4	-53.2902
2060.8	-53.2401
2062.2	-53.3491
2063.6	-53.4036
2065	-53.3578
2066.4	-53.3229
2067.8	-53.3665
2069.2	-53.3469
2070.6	-53.3578
2072	-53.288
2073.4	-53.227
2074.8	-53.2706
2076.2	-53.2488
2077.6	-53.1485
2079	-53.1442
2080.4	-53.0701
2081.8	-53.1376
2083.2	-53.203
2084.6	-53.2466
2086	-53.2183
2087.4	-53.2684
2088.8	-53.2793
2090.2	-53.3273
2091.6	-53.2684
2093	-53.1507
2094.4	-53.1398
2095.8	-53.1747
2097.2	-53.1747
2098.6	-53.1725
2100	-53.1311
2101.4	-53.1856
2102.8	-53.2859
2104.2	-53.288
2105.6	-53.2641
2107	-53.2989
2108.4	-53.3382
2109.8	-53.3927
2111.2	-53.3665
2112.6	-53.3186
2114	-53.312
2115.4	-53.3295
2116.8	-53.3426
2118.2	-53.3229
2119.6	-53.2401
2121	-53.1965
2122.4	-53.2662
2123.8	-53.275
2125.2	-53.2248
2126.6	-53.1943
2128	-53.19
2129.4	-53.2401
2130.8	-53.2924
2132.2	-53.2009
2133.6	-53.2118
2135	-53.2553
2136.4	-53.2292
2137.8	-53.2314
2139.2	-53.2336
2140.6	-53.2205
2142	-53.3011
2143.4	-53.3382
2144.8	-53.3251
2146.2	-53.2619
2147.6	-53.2445
2149	-53.2336
2150.4	-53.3295
2151.8	-53.2466
2153.2	-53.1834
2154.6	-53.2183
2156	-53.2314
2157.4	-53.2205
2158.8	-53.1965
2160.2	-53.1311
2161.6	-53.2009
2163	-53.2662
2164.4	-53.2859
2165.8	-53.2706
2167.2	-53.3273
2168.6	-53.3055
2170	-53.3752
2171.4	-53.3295
2172.8	-53.2488
2174.2	-53.2859
2175.6	-53.3317
2177	-53.3447
2178.4	-53.3273
2179.8	-53.2815
2181.2	-53.3229
2182.6	-53.4079
2184	-53.4079
2185.4	-53.3556
2186.8	-53.3142
2188.2	-53.3317
2189.6	-53.3447
2191	-53.4014
2192.4	-53.3207
2193.8	-53.2837
2195.2	-53.3229
2196.6	-53.3578
2198	-53.3382
2199.4	-53.3273
2200.8	-53.3273
2202.2	-53.4058
2203.6	-53.4385
2205	-53.4559
2206.4	-53.4232
2207.8	-53.4515
2209.2	-53.4842
2210.6	-53.506
2212	-53.4276
2213.4	-53.3731
2214.8	-53.3513
2216.2	-53.3251
2217.6	-53.3186
2219	-53.2553
2220.4	-53.2227
2221.8	-53.3338
2223.2	-53.397
2224.6	-53.3992
2226	-53.3469
2227.4	-53.3665
2228.8	-53.3709
2230.2	-53.4036
2231.6	-53.3796
2233	-53.2968
2234.4	-53.3142
2235.8	-53.3295
2237.2	-53.3186
2238.6	-53.3426
2240	-53.2968
2241.4	-53.3229
2242.8	-53.4079
2244.2	-53.4188
2245.6	-53.3796
2247	-53.3905
2248.4	-53.3861
2249.8	-53.4167
2251.2	-53.4276
2252.6	-53.3404
2254	-53.3338
2255.4	-53.384
2256.8	-53.3818
2258.2	-53.36
2259.6	-53.3207
2261	-53.3207
2262.4	-53.445
2263.8	-53.4886
2265.2	-53.5409
2266.6	-53.5474
2268	-53.602
2269.4	-53.6412
2270.8	-53.6782
2272.2	-53.5649
2273.6	-53.4973
2275	-53.5474
2276.4	-53.5082
2277.8	-53.4624
2279.2	-53.4319
2280.6	-53.3927
2282	-53.469
2283.4	-53.5126
2284.8	-53.4515
2286.2	-53.4188
2287.6	-53.4341
2289	-53.4494
2290.4	-53.5147
2291.8	-53.4406
2293.2	-53.3731
2294.6	-53.3796
2296	-53.3752
2297.4	-53.3317
2298.8	-53.3273
2300.2	-53.2532
2301.6	-53.3033
2303	-53.3861
2304.4	-53.3687
2305.8	-53.3404
2307.2	-53.3513
2308.6	-53.3796
2310	-53.4188
2311.4	-53.4123
2312.8	-53.3404
2314.2	-53.3644
2315.6	-53.4167
2317	-53.4254
2318.4	-53.4232
2319.8	-53.3687
2321.2	-53.397
2322.6	-53.469
2324	-53.4973
2325.4	-53.4821
2326.8	-53.4864
2328.2	-53.4581
2329.6	-53.4951
2331	-53.5431
2332.4	-53.4515
2333.8	-53.4188
2335.2	-53.4668
2336.6	-53.4712
2338	-53.4079
2339.4	-53.3578
2340.8	-53.2946
2342.2	-53.3491
2343.6	-53.3556
2345	-53.312
2346.4	-53.3011
2347.8	-53.3011
2349.2	-53.3011
2350.6	-53.3447
2352	-53.2597
2353.4	-53.2009
2354.8	-53.1965
2356.2	-53.2118
2357.6	-53.1921
2359	-53.1703
2360.4	-53.0788
2361.8	-53.1333
2363.2	-53.1921
2364.6	-53.1856
2366	-53.1703
2367.4	-53.2161
2368.8	-53.2227
2370.2	-53.312
2371.6	-53.3098
2373	-53.2445
2374.4	-53.2445
2375.8	-53.2837
2377.2	-53.2771
2378.6	-53.2684
2380	-53.2139
2381.4	-53.2445
2382.8	-53.2793
2384.2	-53.3098
2385.6	-53.2728
2387	-53.2793
2388.4	-53.2837
2389.8	-53.2989
2391.2	-53.2968
2392.6	-53.2183
2394	-53.2096
2395.4	-53.2096
2396.8	-53.1921
2398.2	-53.19
2399.6	-53.1158
2401	-53.1137
2402.4	-53.1791
2403.8	-53.19
2405.2	-53.1573
2406.6	-53.1507
2408	-53.1703
2409.4	-53.2466
2410.8	-53.2401
2412.2	-53.1573
2413.6	-53.1246
2415	-53.2118
2416.4	-53.2641
2417.8	-53.2815
2419.2	-53.2771
2420.6	-53.2205
2422	-53.2793
2423.4	-53.3295
2424.8	-53.275
2426.2	-53.2423
2427.6	-53.2532
2429	-53.2488
2430.4	-53.2946
2431.8	-53.1921
2433.2	-53.0853
2434.6	-53.118
2436	-53.1289
2437.4	-53.1551
2438.8	-53.1464
2440.2	-53.0984
2441.6	-53.1529
2443	-53.2009
2444.4	-53.1769
2445.8	-53.1529
2447.2	-53.227
2448.6	-53.2401
2450	-53.2771
2451.4	-53.2357
2452.8	-53.118
2454.2	-53.1267
2455.6	-53.166
2457	-53.1442
2458.4	-53.1529
2459.8	-53.1071
2461.2	-53.0897
2462.6	-53.1791
2464	-53.1921
2465.4	-53.1834
2466.8	-53.1921
2468.2	-53.1856
2469.6	-53.2139
2471	-53.2183
2472.4	-53.1071
2473.8	-53.0875
2475.2	-53.1311
2476.6	-53.1616
2478	-53.1594
2479.4	-53.118
2480.8	-53.0941
2482.2	-53.1791
2483.6	-53.2336
2485	-53.2096
2486.4	-53.1965
2487.8	-53.2183
2489.2	-53.2771
2490.6	-53.3426
2492	-53.2684
2493.4	-53.2096
2494.8	-53.2052
2496.2	-53.2445
2497.6	-53.2379
2499	-53.1943
2500.4	-53.0919
2501.8	-53.1573
2503.2	-53.2009
2504.6	-53.2118
2506	-53.1965
2507.4	-53.2227
2508.8	-53.2859
2510.2	-53.3426
2511.6	-53.2968
2513	-53.1921
2514.4	-53.1747
2515.8	-53.1682
2517.2	-53.1856
2518.6	-53.1703
2520	-53.0875
2521.4	-53.105
2522.8	-53.1965
2524.2	-53.2161
2525.6	-53.1551
2527	-53.1769
2528.4	-53.2139
2529.8	-53.2771
2531.2	-53.3251
2532.6	-53.2401
2534	-53.2575
2535.4	-53.2619
2536.8	-53.2575
2538.2	-53.2161
2539.6	-53.1682
2541	-53.1311
2542.4	-53.2096
2543.8	-53.2597
2545.2	-53.19
2546.6	-53.19
2548	-53.2096
2549.4	-53.275
2550.8	-53.3426
2552.2	-53.203
2553.6	-53.1376
2555	-53.1464
2556.4	-53.1812
2557.8	-53.1551
2559.2	-53.1376
2560.6	-53.1333
2562	-53.2052
2563.4	-53.275
2564.8	-53.3098
2566.2	-53.2728
2567.6	-53.3295
2569	-53.3491
2570.4	-53.3861
2571.8	-53.3077
2573.2	-53.2357
2574.6	-53.2466
2576	-53.2706
2577.4	-53.2314
2578.8	-53.2074
2580.2	-53.142
2581.6	-53.1333
2583	-53.2227
2584.4	-53.2597
2585.8	-53.2096
2587.2	-53.2532
2588.6	-53.2684
2590	-53.3186
2591.4	-53.312
2592.8	-53.2706
2594.2	-53.2575
2595.6	-53.2924
2597	-53.3164
2598.4	-53.275
2599.8	-53.1856
2601.2	-53.1812
2602.6	-53.2597
2604	-53.3055
2605.4	-53.2205
2606.8	-53.2248
2608.2	-53.2684
2609.6	-53.3513
2611	-53.3426
2612.4	-53.2662
2613.8	-53.2379
2615.2	-53.2488
2616.6	-53.275
2618	-53.3142
2619.4	-53.2336
2620.8	-53.2161
2622.2	-53.3077
2623.6	-53.3949
2625	-53.3731
2626.4	-53.36
2627.8	-53.3513
2629.2	-53.36
2630.6	-53.4232
2632	-53.36
2633.4	-53.2292
2634.8	-53.2466
2636.2	-53.2728
2637.6	-53.2379
2639	-53.166
2640.4	-53.0941
2641.8	-53.1246
2643.2	-53.2161
2644.6	-53.251
2646	-53.2357
2647.4	-53.2771
2648.8	-53.275
2650.2	-53.3251
2651.6	-53.2902
2653	-53.2292
2654.4	-53.2357
2655.8	-53.2532
2657.2	-53.2575
2658.6	-53.203
2660	-53.0766
2661.4	-53.1289
2662.8	-53.2314
2664.2	-53.2575
2665.6	-53.1834
2667	-53.1878
2668.4	-53.2379
2669.8	-53.2859
2671.2	-53.2815
2672.6	-53.1834
2674	-53.1333
2675.4	-53.2009
2676.8	-53.1921
2678.2	-53.1769
2679.6	-53.1464
2681	-53.1311
2682.4	-53.2314
2683.8	-53.3011
2685.2	-53.2684
2686.6	-53.2989
2688	-53.2946
2689.4	-53.3556
2690.8	-53.3796
2692.2	-53.3229
2693.6	-53.2662
2695	-53.2924
2696.4	-53.3033
2697.8	-53.2662
2699.2	-53.2183
2700.6	-53.2096
2702	-53.2553
2703.4	-53.3229
2704.8	-53.2924
2706.2	-53.2292
2707.6	-53.2728
2709	-53.288
2710.4	-53.3404
2711.8	-53.3338
2713.2	-53.2575
2714.6	-53.2619
2716	-53.2553
2717.4	-53.275
2718.8	-53.2227
2720.2	-53.1529
2721.6	-53.1769
2723	-53.275
2724.4	-53.2924
2725.8	-53.2619
2727.2	-53.2532
2728.6	-53.2989
2730	-53.3665
2731.4	-53.3687
2732.8	-53.2793
2734.2	-53.2706
2735.6	-53.2815
2737	-53.2662
2738.4	-53.2292
2739.8	-53.1747
2741.2	-53.1485
2742.6	-53.2248
2744	-53.2619
2745.4	-53.2466
2746.8	-53.2619
2748.2	-53.2662
2749.6	-53.275
2751	-53.3447
2752.4	-53.2532
2753.8	-53.2139
2755.2	-53.2641
2756.6	-53.227
2758	-53.2074
2759.4	-53.1594
2760.8	-53.118
2762.2	-53.1791
2763.6	-53.2488
2765	-53.2379
2766.4	-53.2401
2767.8	-53.2902
2769.2	-53.3207
2770.6	-53.3796
2772	-53.3426
2773.4	-53.2532
2774.8	-53.2641
2776.2	-53.312
2777.6	-53.2924
2779	-53.2662
2780.4	-53.2248
2781.8	-53.2706
2783.2	-53.3709
2784.6	-53.3665
2786	-53.2815
2787.4	-53.2924
2788.8	-53.3207
2790.2	-53.36
2791.6	-53.3644
2793	-53.2793
2794.4	-53.2662
2795.8	-53.3142
2797.2	-53.3033
[truncated: 956,244+ more rows]

## Sheet: Figure 4 E ii
acsf	Larixyl acetate	acsf
-51.24	-55.02	-48.8
-51.88	-54.98	-52.4
-55.69	-57.68	-58.14
-56.67	-59.75	-56.98
-54.17	-59.98	-56.24
-50.35	-56.55	-52.52
-52.67	-56.82	-53.92
-51.45	-54.5	-52.28
-56.58	-65.12	-59.36
