# Supplementary material for: The cation channel mechanisms of subthreshold inward depolarizing currents in the mice VTA dopaminergic neurons and their roles in the chronic-stress-induced depression-like behavior
Source: eLife. 2024 Dec 6;12:RP88319. doi: 10.7554/eLife.88319 (PMC11623934; doi:10.7554/eLife.88319)
Supplement: Figure 5—source data 3. [file elife-88319-fig5-data3.xlsx]

## Sheet: Sheet1
Con	Trpc6-KD
1.04	0.59
0.67	0.43
1.08	0.4
1.18	0.77
1.14	0.27
