# Supplementary material for: The cation channel mechanisms of subthreshold inward depolarizing currents in the mice VTA dopaminergic neurons and their roles in the chronic-stress-induced depression-like behavior
Source: eLife. 2024 Dec 6;12:RP88319. doi: 10.7554/eLife.88319 (PMC11623934; doi:10.7554/eLife.88319)
Supplement: Figure 5—source data 4. [file elife-88319-fig5-data4.xlsx]

## Sheet: Figure 5 E i up
example trace
Con
Time (ms)	RMP (mV)
0	-0.0824
0.04688	-0.0732
0.09375	-0.0794
0.15625	-0.0824
0.20313	-0.101
0.25	-0.101
0.29688	-0.0916
0.34375	-0.0916
0.40625	-0.0977
0.45313	-0.101
0.5	-0.0855
0.54688	-0.0946
0.59375	-0.0885
0.65625	-0.0977
0.70313	-0.101
0.75	-0.0916
0.79688	-0.0977
0.84375	-0.0977
0.90625	-0.104
0.95313	-0.0885
1	-0.0885
1.04688	-0.0946
1.09375	-0.10681
1.15625	-0.11292
1.20313	-0.11292
1.25	-0.11597
1.29688	-0.12207
1.34375	-0.13123
1.40625	-0.11902
1.45313	-0.10986
1.5	-0.0946
1.54688	-0.08545
1.59375	-0.07935
1.65625	-0.07324
1.70313	-0.0824
1.75	-0.07935
1.79688	-0.0824
1.84375	-0.06714
1.90625	-0.07019
1.95313	-0.0824
2	-0.0885
2.04688	-0.10071
2.09375	-0.10071
2.15625	-0.09766
2.20313	-0.10071
2.25	-0.10071
2.29688	-0.0946
2.34375	-0.0946
2.40625	-0.10681
2.45313	-0.11597
2.5	-0.10986
2.54688	-0.10986
2.59375	-0.10986
2.65625	-0.11292
2.70313	-0.12207
2.75	-0.10986
2.79688	-0.10986
2.84375	-0.11902
2.90625	-0.12817
2.95313	-0.13733
3	-0.13428
3.04688	-0.13428
3.09375	-0.14343
3.15625	-0.14954
3.20313	-0.14038
3.25	-0.14954
3.29688	-0.15869
3.34375	-0.16785
3.40625	-0.16174
3.45313	-0.16174
3.5	-0.15869
3.54688	-0.16479
3.59375	-0.16479
3.65625	-0.14954
3.70313	-0.15564
3.75	-0.15869
3.79688	-0.15564
3.84375	-0.15259
3.90625	-0.14648
3.95313	-0.14954
4	-0.14343
4.04688	-0.14038
4.09375	-0.12512
4.15625	-0.12817
4.20313	-0.13733
4.25	-0.13733
4.29688	-0.12817
4.34375	-0.12207
4.40625	-0.11902
4.45313	-0.11902
4.5	-0.11292
4.54688	-0.10071
4.59375	-0.0946
4.65625	-0.0946
4.70313	-0.0946
4.75	-0.0885
4.79688	-0.08545
4.84375	-0.08545
4.90625	-0.08545
4.95313	-0.0824
5	-0.06104
5.04688	-0.06714
5.09375	-0.07019
5.15625	-0.07019
5.20313	-0.05798
5.25	-0.05493
5.29688	-0.03967
5.34375	-0.04272
5.40625	-0.03052
5.45313	-0.03662
5.5	-0.03357
5.54688	-0.04883
5.59375	-0.04578
5.65625	-0.04883
5.70313	-0.06104
5.75	-0.06409
5.79688	-0.06409
5.84375	-0.05493
5.90625	-0.05188
5.95313	-0.05188
6	-0.04883
6.04688	-0.04883
6.09375	-0.04272
6.15625	-0.03052
6.20313	-0.02441
6.25	-0.01221
6.29688	-0.02136
6.34375	-0.01526
6.40625	-0.02136
6.45313	-0.01221
6.5	-0.0061
6.54688	0.0061
6.59375	-0.00305
6.65625	-0.00916
6.70313	-0.0061
6.75	-0.01526
6.79688	-0.0061
6.84375	-0.01831
6.90625	-0.02441
6.95313	-0.04272
7	-0.02747
7.04688	-0.03967
7.09375	-0.03357
7.15625	-0.03967
7.20313	-0.04272
7.25	-0.04883
7.29688	-0.05188
7.34375	-0.06104
7.40625	-0.05493
7.45313	-0.03662
7.5	-0.04578
7.54688	-0.04883
7.59375	-0.06104
7.65625	-0.05798
7.70313	-0.04883
7.75	-0.04883
7.79688	-0.04883
7.84375	-0.05188
7.90625	-0.04272
7.95313	-0.04578
8	-0.05188
8.04688	-0.05493
8.09375	-0.04578
8.15625	-0.04883
8.20313	-0.04883
8.25	-0.05188
8.29688	-0.05493
8.34375	-0.05188
8.40625	-0.05493
8.45313	-0.06104
8.5	-0.07935
8.54688	-0.07629
8.59375	-0.07324
8.65625	-0.07324
8.70313	-0.07019
8.75	-0.07019
8.79688	-0.04578
8.84375	-0.05188
8.90625	-0.05493
8.95313	-0.06409
9	-0.04578
9.04688	-0.03967
9.09375	-0.03052
9.15625	-0.04272
9.20313	-0.04883
9.25	-0.03357
9.29688	-0.03662
9.34375	-0.03662
9.40625	-0.05493
9.45313	-0.04272
9.5	-0.05188
9.54688	-0.05188
9.59375	-0.06104
9.65625	-0.06104
9.70313	-0.05493
9.75	-0.05798
9.79688	-0.06714
9.84375	-0.07324
9.90625	-0.06409
9.95313	-0.06714
10	-0.07019
10.0469	-0.0885
10.0938	-0.09155
10.1562	-0.09155
10.2031	-0.09766
10.25	-0.0946
10.2969	-0.10681
10.3438	-0.08545
10.4062	-0.09155
10.4531	-0.0885
10.5	-0.07935
10.5469	-0.07324
10.5938	-0.05798
10.6562	-0.06714
10.7031	-0.06409
10.75	-0.07019
10.7969	-0.05188
10.8438	-0.05188
10.9062	-0.05798
10.9531	-0.06409
11	-0.06409
11.0469	-0.06104
11.0938	-0.05188
11.1562	-0.05798
11.2031	-0.05798
11.25	-0.05188
11.2969	-0.06714
11.3438	-0.07019
11.4062	-0.07935
11.4531	-0.06409
11.5	-0.05798
11.5469	-0.05798
11.5938	-0.06714
11.6562	-0.06714
11.7031	-0.05798
11.75	-0.05493
11.7969	-0.05188
11.8438	-0.06104
11.9062	-0.05798
11.9531	-0.05798
12	-0.05188
12.0469	-0.05493
12.0938	-0.04578
12.1562	-0.03357
12.2031	-0.04578
12.25	-0.04883
12.2969	-0.06104
12.3438	-0.04578
12.4062	-0.04272
12.4531	-0.04578
12.5	-0.04883
12.5469	-0.05798
12.5938	-0.03967
12.6562	-0.03967
12.7031	-0.02747
12.75	-0.03052
12.7969	-0.02136
12.8438	-0.01831
12.9062	-0.02136
12.9531	-0.02136
13	-0.02136
13.0469	-0.00305
13.0938	-0.0061
13.1562	-0.0061
13.2031	-0.01526
13.25	-0.00916
13.2969	-0.0061
13.3438	-0.01221
13.4062	-0.01221
13.4531	-0.01831
13.5	-0.00305
13.5469	-0.0061
13.5938	0.0061
13.6562	0.00916
13.7031	0.02136
13.75	0.03052
13.7969	0.02441
13.8438	0.02136
13.9062	0.01221
13.9531	0.03052
14	0.01831
14.0469	0.01526
14.0938	0.00916
14.1562	0.01221
14.2031	0.01221
14.25	0.0061
14.2969	0.00305
14.3438	-0.0061
14.4062	0.00305
14.4531	-0.01221
14.5	-0.01526
14.5469	-0.02136
14.5938	-0.01221
14.6562	-0.01831
14.7031	-0.02441
14.75	-0.03052
14.7969	-0.03662
14.8438	-0.03052
14.9062	-0.02747
14.9531	-0.02441
15	-0.03052
15.0469	-0.03662
15.0938	-0.04272
15.1562	-0.04272
15.2031	-0.05493
15.25	-0.06104
15.2969	-0.06409
15.3438	-0.07019
15.4062	-0.0824
15.4531	-0.09155
15.5	-0.07935
15.5469	-0.0946
15.5938	-0.10071
15.6562	-0.11902
15.7031	-0.11902
15.75	-0.11597
15.7969	-0.12207
15.8438	-0.13123
15.9062	-0.14038
15.9531	-0.13733
16	-0.13428
16.0469	-0.13733
16.0938	-0.12817
16.1562	-0.12817
16.2031	-0.12512
16.25	-0.12512
16.2969	-0.12512
16.3438	-0.13428
16.4062	-0.12207
16.4531	-0.12207
16.5	-0.13428
16.5469	-0.14343
16.5938	-0.14038
16.6562	-0.13733
16.7031	-0.14038
16.75	-0.13428
16.7969	-0.13733
16.8438	-0.12817
16.9062	-0.14343
16.9531	-0.14954
17	-0.14954
17.0469	-0.14038
17.0938	-0.14038
17.1562	-0.14648
17.2031	-0.15869
17.25	-0.15869
17.2969	-0.13428
17.3438	-0.12817
17.4062	-0.12207
17.4531	-0.13733
17.5	-0.12817
17.5469	-0.13123
17.5938	-0.13123
17.6562	-0.12512
17.7031	-0.12817
17.75	-0.11292
17.7969	-0.11597
17.8438	-0.11902
17.9062	-0.11597
17.9531	-0.10071
18	-0.0946
18.0469	-0.0885
18.0938	-0.10376
18.1562	-0.10681
18.2031	-0.09766
18.25	-0.10071
18.2969	-0.10376
18.3438	-0.10681
18.4062	-0.10071
18.4531	-0.09766
18.5	-0.0946
18.5469	-0.0946
18.5938	-0.0946
18.6562	-0.08545
18.7031	-0.0885
18.75	-0.10376
18.7969	-0.10681
18.8438	-0.10071
18.9062	-0.09766
18.9531	-0.0946
19	-0.10681
19.0469	-0.10071
19.0938	-0.09155
19.1562	-0.0946
19.2031	-0.09766
19.25	-0.10071
19.2969	-0.10376
19.3438	-0.10071
19.4062	-0.10986
19.4531	-0.11597
19.5	-0.11902
19.5469	-0.10986
19.5938	-0.10681
19.6562	-0.11292
19.7031	-0.11292
19.75	-0.10071
19.7969	-0.09766
19.8438	-0.0946
19.9062	-0.10376
19.9531	-0.10071
20	-0.10071
20.0469	-0.10071
20.0938	-0.10986
20.1562	-0.11597
20.2031	-0.10681
20.25	-0.10376
20.2969	-0.10376
20.3438	-0.11292
20.4062	-0.10681
20.4531	-0.09155
20.5	-0.0885
20.5469	-0.0946
20.5938	-0.10071
20.6562	-0.0946
20.7031	-0.0946
20.75	-0.09155
20.7969	-0.10071
20.8438	-0.0946
20.9062	-0.0885
20.9531	-0.0885
21	-0.0885
21.0469	-0.0824
21.0938	-0.07019
21.1562	-0.07935
21.2031	-0.07629
21.25	-0.0824
21.2969	-0.07935
21.3438	-0.06409
21.4062	-0.07019
21.4531	-0.06409
21.5	-0.07629
21.5469	-0.06409
21.5938	-0.06714
21.6562	-0.07324
21.7031	-0.0824
21.75	-0.0824
21.7969	-0.09155
21.8438	-0.09766
21.9062	-0.10681
21.9531	-0.10986
22	-0.10376
22.0469	-0.10986
22.0938	-0.10986
22.1562	-0.11597
22.2031	-0.10071
22.25	-0.09766
22.2969	-0.09155
22.3438	-0.0946
22.4062	-0.10376
22.4531	-0.10986
22.5	-0.12512
22.5469	-0.12512
22.5938	-0.12207
22.6562	-0.12817
22.7031	-0.13123
22.75	-0.13428
22.7969	-0.13428
22.8438	-0.13733
22.9062	-0.14038
22.9531	-0.14038
23	-0.15259
23.0469	-0.15259
23.0938	-0.15869
23.1562	-0.15869
23.2031	-0.16479
23.25	-0.16174
23.2969	-0.1709
23.3438	-0.16174
23.4062	-0.16174
23.4531	-0.16479
23.5	-0.16479
23.5469	-0.16174
23.5938	-0.16174
23.6562	-0.16174
23.7031	-0.1709
23.75	-0.16479
23.7969	-0.15259
23.8438	-0.14954
23.9062	-0.16174
23.9531	-0.16479
24	-0.15869
24.0469	-0.16174
24.0938	-0.16785
24.1562	-0.177
24.2031	-0.177
24.25	-0.16785
24.2969	-0.16785
24.3438	-0.16174
24.4062	-0.16479
24.4531	-0.15259
24.5	-0.14954
24.5469	-0.15564
24.5938	-0.15564
24.6562	-0.14343
24.7031	-0.12817
24.75	-0.12207
24.7969	-0.12512
24.8438	-0.11902
24.9062	-0.11292
24.9531	-0.11292
25	-0.10986
25.0469	-0.10071
25.0938	-0.0946
25.1562	-0.07935
25.2031	-0.07629
25.25	-0.07629
25.2969	-0.07324
25.3438	-0.06409
25.4062	-0.05798
25.4531	-0.07019
25.5	-0.07629
25.5469	-0.07629
25.5938	-0.06104
25.6562	-0.06104
25.7031	-0.05493
25.75	-0.05798
25.7969	-0.05188
25.8438	-0.05188
25.9062	-0.06104
25.9531	-0.05798
26	-0.04883
26.0469	-0.02747
26.0938	-0.02441
26.1562	-0.02441
26.2031	-0.03052
26.25	-0.01221
26.2969	-0.01831
26.3438	-0.01221
26.4062	-0.01526
26.4531	-0.02136
26.5	-0.00916
26.5469	-0.01526
26.5938	-0.0061
26.6562	-0.01526
26.7031	0.00916
26.75	-0.00305
26.7969	-0.00305
26.8438	-0.00916
26.9062	0.0061
26.9531	0.00305
27	0.00916
27.0469	-0.0061
27.0938	-0.01221
27.1562	0.0061
27.2031	-0.00305
27.25	0.00305
27.2969	-0.01221
27.3438	-0.01221
27.4062	-0.01526
27.4531	-0.01526
27.5	-0.01831
27.5469	-0.00916
27.5938	-0.00305
27.6562	-0.00305
27.7031	-0.02136
27.75	-0.03052
27.7969	-0.03357
27.8438	-0.03052
27.9062	-0.03357
27.9531	-0.04272
28	-0.04883
28.0469	-0.03052
28.0938	-0.03967
28.1562	-0.03052
28.2031	-0.04272
28.25	-0.03967
28.2969	-0.04272
28.3438	-0.04883
28.4062	-0.05493
28.4531	-0.05493
28.5	-0.04578
28.5469	-0.04883
28.5938	-0.05188
28.6562	-0.06104
28.7031	-0.04883
28.75	-0.05188
28.7969	-0.04883
28.8438	-0.06104
28.9062	-0.05798
28.9531	-0.04578
29	-0.04883
29.0469	-0.04272
29.0938	-0.03967
29.1562	-0.02441
29.2031	-0.01526
29.25	-0.02747
29.2969	-0.03662
29.3438	-0.03662
29.4062	-0.02747
29.4531	-0.03052
29.5	-0.04272
29.5469	-0.05188
29.5938	-0.04272
29.6562	-0.04272
29.7031	-0.03967
29.75	-0.04272
29.7969	-0.04883
29.8438	-0.04578
29.9062	-0.05188
29.9531	-0.06409
30	-0.07019
30.0469	-0.05798
30.0938	-0.05798
30.1562	-0.06409
30.2031	-0.06714
30.25	-0.06714
30.2969	-0.06409
30.3438	-0.05188
30.4062	-0.06714
30.4531	-0.06409
30.5	-0.06104
30.5469	-0.07019
30.5938	-0.06714
30.6562	-0.07935
30.7031	-0.06409
30.75	-0.05798
30.7969	-0.06104
30.8438	-0.07629
30.9062	-0.08545
30.9531	-0.07019
31	-0.07935
31.0469	-0.07324
31.0938	-0.07935
31.1562	-0.07629
31.2031	-0.07019
31.25	-0.06714
31.2969	-0.06409
31.3438	-0.06104
31.4062	-0.06104
31.4531	-0.06714
31.5	-0.06104
31.5469	-0.06104
31.5938	-0.06714
31.6562	-0.07019
31.7031	-0.07629
31.75	-0.08545
31.7969	-0.0946
31.8438	-0.07935
31.9062	-0.07935
31.9531	-0.07324
32	-0.07324
32.0469	-0.07019
32.0938	-0.06104
32.1562	-0.06104
32.2031	-0.05798
32.25	-0.04883
32.2969	-0.03357
32.3438	-0.03662
32.4062	-0.04272
32.4531	-0.04272
32.5	-0.02441
32.5469	-0.02441
32.5938	-0.02441
32.6562	-0.03967
32.7031	-0.04578
32.75	-0.03967
32.7969	-0.04272
32.8438	-0.04578
32.9062	-0.05188
32.9531	-0.04883
33	-0.04578
33.0469	-0.04272
33.0938	-0.03662
33.1562	-0.02747
33.2031	-0.01831
33.25	-0.01831
33.2969	-0.02441
33.3438	-0.02747
33.4062	-0.00916
33.4531	-0.00916
33.5	-0.0061
33.5469	-0.01526
33.5938	-0.01526
33.6562	-0.0061
33.7031	-0.00305
33.75	-0.00305
33.7969	-0.00305
33.8438	0.00916
33.9062	0.00305
33.9531	0.00916
34	-0.00305
34.0469	0.00305
34.0938	0.0061
34.1562	0.0061
34.2031	-0.0061
34.25	-0.01526
34.2969	0
34.3438	0
34.4062	-0.00305
34.4531	-0.01526
34.5	-0.01831
34.5469	-0.01526
34.5938	-0.01831
34.6562	-0.02747
34.7031	-0.03357
34.75	-0.03357
34.7969	-0.03052
34.8438	-0.04272
34.9062	-0.05493
34.9531	-0.05798
35	-0.04578
35.0469	-0.04272
35.0938	-0.05798
35.1562	-0.07324
35.2031	-0.06714
35.25	-0.07324
35.2969	-0.07324
35.3438	-0.07629
35.4062	-0.08545
35.4531	-0.0824
35.5	-0.09155
35.5469	-0.10071
35.5938	-0.11292
35.6562	-0.10986
35.7031	-0.10986
35.75	-0.12207
35.7969	-0.12512
35.8438	-0.12207
35.9062	-0.12207
35.9531	-0.12512
36	-0.13123
36.0469	-0.14954
36.0938	-0.14038
36.1562	-0.15564
36.2031	-0.14954
36.25	-0.14954
36.2969	-0.14343
36.3438	-0.13123
36.4062	-0.13733
36.4531	-0.14038
36.5	-0.14954
36.5469	-0.13733
36.5938	-0.14343
36.6562	-0.14954
36.7031	-0.16785
36.75	-0.16174
36.7969	-0.16479
36.8438	-0.15869
36.9062	-0.16479
36.9531	-0.16785
37	-0.14954
37.0469	-0.15259
37.0938	-0.14343
37.1562	-0.14343
37.2031	-0.13123
37.25	-0.12817
37.2969	-0.12817
37.3438	-0.13733
37.4062	-0.13428
37.4531	-0.12207
37.5	-0.12207
37.5469	-0.13123
37.5938	-0.13733
37.6562	-0.12207
37.7031	-0.12512
37.75	-0.11292
37.7969	-0.12207
37.8438	-0.12817
37.9062	-0.12512
37.9531	-0.12817
38	-0.13428
38.0469	-0.13428
38.0938	-0.13123
38.1562	-0.12512
38.2031	-0.13123
38.25	-0.13123
38.2969	-0.12817
38.3438	-0.10986
38.4062	-0.10986
38.4531	-0.11292
38.5	-0.10986
38.5469	-0.10071
38.5938	-0.10681
38.6562	-0.0946
38.7031	-0.10071
38.75	-0.10071
38.7969	-0.09155
38.8438	-0.0946
38.9062	-0.10681
38.9531	-0.10681
39	-0.09766
39.0469	-0.10071
39.0938	-0.10376
39.1562	-0.10681
39.2031	-0.10986
39.25	-0.10986
39.2969	-0.10681
39.3438	-0.10071
39.4062	-0.10071
39.4531	-0.09766
39.5	-0.09766
39.5469	-0.0946
39.5938	-0.08545
39.6562	-0.0885
39.7031	-0.0824
39.75	-0.09766
39.7969	-0.09766
39.8438	-0.09766
39.9062	-0.09155
39.9531	-0.0885
40	-0.0946
40.0469	-0.0885
40.0938	-0.09155
40.1562	-0.08545
40.2031	-0.0824
40.25	-0.08545
40.2969	-0.08545
40.3438	-0.07629
40.4062	-0.07629
40.4531	-0.07935
40.5	-0.08545
40.5469	-0.07324
40.5938	-0.06714
40.6562	-0.06409
40.7031	-0.06714
40.75	-0.06714
40.7969	-0.05188
40.8438	-0.06104
40.9062	-0.06409
40.9531	-0.07935
41	-0.07935
41.0469	-0.08545
41.0938	-0.09155
41.1562	-0.0946
41.2031	-0.10071
41.25	-0.08545
41.2969	-0.09766
41.3438	-0.10376
41.4062	-0.11292
41.4531	-0.10071
41.5	-0.10376
41.5469	-0.10986
41.5938	-0.10986
41.6562	-0.11902
41.7031	-0.10376
41.75	-0.10986
41.7969	-0.11597
41.8438	-0.11597
41.9062	-0.11597
41.9531	-0.10986
42	-0.11292
42.0469	-0.11292
42.0938	-0.11902
42.1562	-0.10681
42.2031	-0.11292
42.25	-0.12207
42.2969	-0.12817
42.3438	-0.11292
42.4062	-0.10681
42.4531	-0.10986
42.5	-0.12512
42.5469	-0.13733
42.5938	-0.12512
42.6562	-0.12512
42.7031	-0.12817
42.75	-0.13123
42.7969	-0.13123
42.8438	-0.13733
42.9062	-0.14648
42.9531	-0.15564
43	-0.15564
43.0469	-0.14343
43.0938	-0.14648
43.1562	-0.16479
43.2031	-0.17395
43.25	-0.16479
43.2969	-0.16479
43.3438	-0.15869
43.4062	-0.16785
43.4531	-0.16785
43.5	-0.15869
43.5469	-0.15869
43.5938	-0.16174
43.6562	-0.16174
43.7031	-0.15564
43.75	-0.16785
43.7969	-0.16785
43.8438	-0.177
43.9062	-0.16479
43.9531	-0.15564
44	-0.15564
44.0469	-0.16174
44.0938	-0.16174
44.1562	-0.14954
44.2031	-0.15564
44.25	-0.15259
44.2969	-0.15869
44.3438	-0.15259
44.4062	-0.14343
44.4531	-0.14038
44.5	-0.13733
44.5469	-0.13733
44.5938	-0.11902
44.6562	-0.12207
44.7031	-0.11902
44.75	-0.12512
44.7969	-0.11597
44.8438	-0.10986
44.9062	-0.10071
44.9531	-0.10376
45	-0.10376
45.0469	-0.08545
45.0938	-0.0885
45.1562	-0.0824
45.2031	-0.0885
45.25	-0.07935
45.2969	-0.07324
45.3438	-0.06714
45.4062	-0.07324
45.4531	-0.07019
45.5	-0.04272
45.5469	-0.04883
45.5938	-0.04272
45.6562	-0.05188
45.7031	-0.04272
45.75	-0.04272
45.7969	-0.03662
45.8438	-0.04272
45.9062	-0.05188
45.9531	-0.03662
46	-0.04272
46.0469	-0.03357
46.0938	-0.03357
46.1562	-0.02136
46.2031	-0.01831
46.25	-0.00916
46.2969	-0.01221
46.3438	-0.00916
46.4062	0.0061
46.4531	0.00916
46.5	0.00305
46.5469	-0.00305
46.5938	0.0061
46.6562	0.0061
46.7031	0.01831
46.75	0.01831
46.7969	0.01831
46.8438	0.01831
46.9062	0.00305
46.9531	-0.00916
47	-0.01526
47.0469	-0.0061
47.0938	0.0061
47.1562	0.00305
47.2031	0
47.25	0
47.2969	0.0061
47.3438	0.0061
47.4062	-0.00305
47.4531	-0.00916
47.5	-0.0061
47.5469	-0.00305
47.5938	-0.00305
47.6562	-0.00305
47.7031	-0.00305
47.75	0.01221
47.7969	-0.00305
47.8438	-0.00305
47.9062	-0.01526
47.9531	-0.00305
48	-0.0061
48.0469	-0.01221
48.0938	-0.01526
48.1562	-0.01831
48.2031	-0.02136
48.25	-0.02136
48.2969	-0.02441
48.3438	-0.02747
48.4062	-0.03357
48.4531	-0.03967
48.5	-0.04272
48.5469	-0.05493
48.5938	-0.05493
48.6562	-0.04883
48.7031	-0.05493
48.75	-0.05798
48.7969	-0.06714
48.8438	-0.06104
48.9062	-0.06104
48.9531	-0.07324
49	-0.07324
49.0469	-0.07324
49.0938	-0.07019
49.1562	-0.06714
49.2031	-0.06714
49.25	-0.07019
49.2969	-0.05493
49.3438	-0.06104
49.4062	-0.06409
49.4531	-0.07324
49.5	-0.07324
49.5469	-0.06409
49.5938	-0.07019
49.6562	-0.06714
49.7031	-0.07324
49.75	-0.06104
49.7969	-0.06714
49.8438	-0.07324
49.9062	-0.07324
49.9531	-0.07629
50	-0.07324
50.0469	-0.07629
50.0938	-0.07935
50.1562	-0.08545
50.2031	-0.06714
50.25	-0.07019
50.2969	-0.07019
50.3438	-0.07019
50.4062	-0.06714
50.4531	-0.05188
50.5	-0.05493
50.5469	-0.05798
50.5938	-0.06714
50.6562	-0.05798
50.7031	-0.06409
50.75	-0.06714
50.7969	-0.07019
50.8438	-0.07324
50.9062	-0.07324
50.9531	-0.07935
51	-0.0885
51.0469	-0.07935
51.0938	-0.06714
51.1562	-0.07629
51.2031	-0.07935
51.25	-0.09155
51.2969	-0.09155
51.3438	-0.08545
51.4062	-0.07935
51.4531	-0.0885
51.5	-0.09155
51.5469	-0.07629
51.5938	-0.0824
51.6562	-0.07324
51.7031	-0.07935
51.75	-0.06104
51.7969	-0.05798
51.8438	-0.05493
51.9062	-0.06104
51.9531	-0.06104
52	-0.04272
52.0469	-0.04578
52.0938	-0.05493
52.1562	-0.06714
52.2031	-0.06104
52.25	-0.05188
52.2969	-0.05493
52.3438	-0.05493
52.4062	-0.06714
52.4531	-0.05188
52.5	-0.05798
52.5469	-0.04578
52.5938	-0.05188
52.6562	-0.03662
52.7031	-0.02747
52.75	-0.03357
52.7969	-0.03357
52.8438	-0.03662
52.9062	-0.02136
52.9531	-0.02136
53	-0.03052
53.0469	-0.03967
53.0938	-0.02747
53.1562	-0.01526
53.2031	-0.01526
53.25	-0.01831
53.2969	-0.01831
53.3438	-0.01526
53.4062	-0.01831
53.4531	-0.02136
53.5	-0.02136
53.5469	-0.01526
53.5938	-0.01831
53.6562	-0.02747
53.7031	-0.03052
53.75	-0.03052
53.7969	-0.01526
53.8438	-0.01221
53.9062	-0.01526
53.9531	-0.01831
54	-0.01221
54.0469	-0.0061
54.0938	-0.01221
54.1562	-0.01526
54.2031	-0.02136
54.25	-0.01221
54.2969	-0.01526
54.3438	-0.01831
54.4062	-0.01221
54.4531	-0.00305
54.5	-0.00305
54.5469	-0.01831
54.5938	-0.03357
54.6562	-0.04272
54.7031	-0.03662
54.75	-0.04272
54.7969	-0.03967
54.8438	-0.04272
54.9062	-0.03357
54.9531	-0.03967
55	-0.04272
55.0469	-0.04883
55.0938	-0.05493
55.1562	-0.05798
55.2031	-0.06714
55.25	-0.07935
55.2969	-0.09155
55.3438	-0.07935
55.4062	-0.09766
55.4531	-0.09766
55.5	-0.11292
55.5469	-0.11292
55.5938	-0.12512
55.6562	-0.12512
55.7031	-0.12512
55.75	-0.12512
55.7969	-0.11292
55.8438	-0.13733
55.9062	-0.13123
55.9531	-0.13123
56	-0.12512
56.0469	-0.11597
56.0938	-0.11902
56.1562	-0.12207
56.2031	-0.12512
56.25	-0.13733
56.2969	-0.14954
56.3438	-0.14954
56.4062	-0.15259
56.4531	-0.14343
56.5	-0.14954
56.5469	-0.14954
56.5938	-0.14343
56.6562	-0.14954
56.7031	-0.13428
56.75	-0.13733
56.7969	-0.14343
56.8438	-0.14648
56.9062	-0.14038
56.9531	-0.13733
57	-0.13428
57.0469	-0.14038
57.0938	-0.13733
57.1562	-0.12512
57.2031	-0.12207
57.25	-0.11902
57.2969	-0.12207
57.3438	-0.11292
57.4062	-0.12207
57.4531	-0.12207
57.5	-0.13123
57.5469	-0.11902
57.5938	-0.10681
57.6562	-0.11597
57.7031	-0.12512
57.75	-0.13123
57.7969	-0.12817
57.8438	-0.12512
57.9062	-0.12817
57.9531	-0.13733
58	-0.13428
58.0469	-0.13123
58.0938	-0.12817
58.1562	-0.13428
58.2031	-0.12207
58.25	-0.10986
58.2969	-0.11597
58.3438	-0.11292
58.4062	-0.10681
58.4531	-0.10071
58.5	-0.07935
58.5469	-0.0885
58.5938	-0.10071
58.6562	-0.10071
58.7031	-0.10071
58.75	-0.09766
58.7969	-0.09155
58.8438	-0.09155
58.9062	-0.09155
58.9531	-0.0824
59	-0.08545
59.0469	-0.0885
59.0938	-0.0946
59.1562	-0.08545
59.2031	-0.09766
59.25	-0.10376
59.2969	-0.11292
59.3438	-0.11597
59.4062	-0.10376
59.4531	-0.11902
59.5	-0.12207
59.5469	-0.13123
59.5938	-0.11292
59.6562	-0.10986
59.7031	-0.10681
59.75	-0.10376
59.7969	-0.0946
59.8438	-0.0885
59.9062	-0.0885
59.9531	-0.09155
60	-0.09155
60.0469	-0.07324
60.0938	-0.0824
60.1562	-0.07324
60.2031	-0.0885
60.25	-0.07629
60.2969	-0.07935
60.3438	-0.0824
60.4062	-0.0885
60.4531	-0.09766
60.5	-0.09155
60.5469	-0.10376
60.5938	-0.09766
60.6562	-0.10376
60.7031	-0.0885
60.75	-0.09155
60.7969	-0.0885
60.8438	-0.09766
60.9062	-0.09766
60.9531	-0.0824
61	-0.09155
61.0469	-0.0946
61.0938	-0.10376
61.1562	-0.09766
61.2031	-0.10376
61.25	-0.09766
61.2969	-0.10681
61.3438	-0.10986
61.4062	-0.09155
61.4531	-0.0946
61.5	-0.0946
61.5469	-0.0946
61.5938	-0.08545
61.6562	-0.0885
61.7031	-0.0885
61.75	-0.10071
61.7969	-0.09766
61.8438	-0.0885
61.9062	-0.09155
61.9531	-0.0946
62	-0.10376
62.0469	-0.10071
62.0938	-0.10681
62.1562	-0.10986
62.2031	-0.11597
62.25	-0.11292
62.2969	-0.10681
62.3438	-0.11292
62.4062	-0.12207
62.4531	-0.12817
62.5	-0.12207
62.5469	-0.12512
62.5938	-0.13428
62.6562	-0.14343
62.7031	-0.14343
62.75	-0.13428
62.7969	-0.13428
62.8438	-0.14038
62.9062	-0.14343
62.9531	-0.13733
63	-0.14038
63.0469	-0.14343
63.0938	-0.14648
63.1562	-0.14648
63.2031	-0.14343
63.25	-0.15564
63.2969	-0.16785
63.3438	-0.18311
63.4062	-0.17395
63.4531	-0.1709
63.5	-0.1709
63.5469	-0.177
63.5938	-0.18005
63.6562	-0.16785
63.7031	-0.1709
63.75	-0.16785
63.7969	-0.17395
63.8438	-0.15259
63.9062	-0.16174
63.9531	-0.15869
64	-0.16174
64.0469	-0.15259
64.0938	-0.14648
64.1562	-0.14954
64.2031	-0.16174
64.25	-0.16785
64.2969	-0.14343
64.3438	-0.14648
64.4062	-0.13123
64.4531	-0.14038
64.5	-0.13123
64.5469	-0.14038
64.5938	-0.13733
64.6562	-0.14954
64.7031	-0.14038
64.75	-0.14038
64.7969	-0.14038
64.8438	-0.14038
64.9062	-0.12817
64.9531	-0.13123
65	-0.11902
65.0469	-0.11292
65.0938	-0.10986
65.1562	-0.10986
65.2031	-0.09155
65.25	-0.08545
65.2969	-0.08545
65.3438	-0.09155
65.4062	-0.09155
65.4531	-0.0885
65.5	-0.08545
65.5469	-0.07935
65.5938	-0.07935
65.6562	-0.05188
65.7031	-0.05188
65.75	-0.04883
65.7969	-0.05798
65.8438	-0.04272
65.9062	-0.03052
65.9531	-0.02136
66	-0.02441
66.0469	-0.02136
66.0938	-0.00305
66.1562	0
66.2031	0
66.25	-0.00305
66.2969	0.00916
66.3438	0
66.4062	0
66.4531	-0.00916
66.5	-0.0061
66.5469	0.00305
66.5938	-0.0061
66.6562	-0.01221
66.7031	-0.01831
66.75	-0.01221
66.7969	0
66.8438	-0.00305
66.9062	-0.00305
66.9531	-0.0061
67	0
67.0469	-0.00305
67.0938	-0.00305
67.1562	-0.0061
67.2031	0.0061
67.25	0.00305
67.2969	0
67.3438	-0.00916
67.4062	-0.00305
67.4531	0.01221
67.5	0.00916
67.5469	0
67.5938	-0.01221
67.6562	-0.01526
67.7031	-0.01526
67.75	-0.02136
67.7969	-0.02441
67.8438	-0.02441
67.9062	-0.01831
67.9531	-0.02441
68	-0.01831
68.0469	-0.02747
68.0938	-0.00916
68.1562	-0.01221
68.2031	-0.01221
68.25	-0.02441
68.2969	-0.02441
68.3438	-0.0061
68.4062	0
68.4531	-0.0061
68.5	-0.01221
68.5469	-0.01526
68.5938	-0.02136
68.6562	-0.03967
68.7031	-0.04578
68.75	-0.04883
68.7969	-0.04578
68.8438	-0.05188
68.9062	-0.05188
68.9531	-0.06714
69	-0.03967
69.0469	-0.04578
69.0938	-0.04883
69.1562	-0.06104
69.2031	-0.05493
69.25	-0.04578
69.2969	-0.03662
69.3438	-0.04578
69.4062	-0.05188
69.4531	-0.04883
69.5	-0.04883
69.5469	-0.06104
69.5938	-0.06104
69.6562	-0.06409
69.7031	-0.06714
69.75	-0.07324
69.7969	-0.0824
69.8438	-0.0824
69.9062	-0.06409
69.9531	-0.06409
70	-0.07324
70.0469	-0.07629
70.0938	-0.07324
70.1562	-0.06714
70.2031	-0.07019
70.25	-0.06714
70.2969	-0.07935
70.3438	-0.06714
70.4062	-0.07935
70.4531	-0.0824
70.5	-0.07935
70.5469	-0.0824
70.5938	-0.07629
70.6562	-0.0824
70.7031	-0.09155
70.75	-0.0946
70.7969	-0.08545
70.8438	-0.08545
70.9062	-0.08545
70.9531	-0.0946
71	-0.0885
71.0469	-0.08545
71.0938	-0.0885
71.1562	-0.09155
71.2031	-0.09155
71.25	-0.09155
71.2969	-0.0946
71.3438	-0.10376
71.4062	-0.10376
71.4531	-0.0946
71.5	-0.08545
71.5469	-0.0824
71.5938	-0.08545
71.6562	-0.07629
71.7031	-0.06714
71.75	-0.06104
71.7969	-0.05493
71.8438	-0.05188
71.9062	-0.04272
71.9531	-0.04578
72	-0.03662
72.0469	-0.03967
72.0938	-0.02747
72.1562	-0.02441
72.2031	-0.01831
72.25	-0.02441
72.2969	-0.03052
72.3438	-0.01831
72.4062	-0.02136
72.4531	-0.01831
72.5	-0.02441
72.5469	-0.01831
72.5938	-0.02441
72.6562	-0.02747
72.7031	-0.02441
72.75	-0.02441
72.7969	-0.03052
72.8438	-0.03357
72.9062	-0.03052
72.9531	-0.03052
73	-0.02747
73.0469	-0.01831
73.0938	-0.01221
73.1562	-0.01221
73.2031	-0.0061
73.25	0.00305
73.2969	0
73.3438	0.00916
73.4062	0.00916
73.4531	0.0061
73.5	0.01526
73.5469	0.01831
73.5938	0.0061
73.6562	0.00305
73.7031	0.0061
73.75	-0.00916
73.7969	-0.0061
73.8438	-0.00916
73.9062	-0.00305
73.9531	0.00916
74	0.00916
74.0469	0
74.0938	0
74.1562	0.0061
74.2031	0
74.25	0.00305
74.2969	0
74.3438	0
74.4062	-0.00305
74.4531	0.00305
74.5	-0.00305
74.5469	0
74.5938	0.0061
74.6562	0
74.7031	-0.00916
74.75	-0.01526
74.7969	-0.01526
74.8438	-0.02136
74.9062	-0.03357
74.9531	-0.04883
75	-0.05493
75.0469	-0.06104
75.0938	-0.05493
75.1562	-0.06104
75.2031	-0.06409
75.25	-0.06714
75.2969	-0.06714
75.3438	-0.07935
75.4062	-0.09155
75.4531	-0.0885
75.5	-0.07019
75.5469	-0.0824
75.5938	-0.09155
75.6562	-0.10376
75.7031	-0.10681
75.75	-0.10376
75.7969	-0.10681
75.8438	-0.12207
75.9062	-0.13428
75.9531	-0.12207
76	-0.13123
76.0469	-0.13733
76.0938	-0.15259
76.1562	-0.15564
76.2031	-0.15564
76.25	-0.16174
76.2969	-0.16479
76.3438	-0.1709
76.4062	-0.14343
76.4531	-0.14343
76.5	-0.14343
76.5469	-0.15564
76.5938	-0.14954
76.6562	-0.14648
76.7031	-0.14648
76.75	-0.14343
76.7969	-0.13733
76.8438	-0.12512
76.9062	-0.12512
76.9531	-0.12512
77	-0.12817
77.0469	-0.10681
77.0938	-0.11597
77.1562	-0.11597
77.2031	-0.12207
77.25	-0.12512
77.2969	-0.11292
77.3438	-0.11292
77.4062	-0.12512
77.4531	-0.13428
77.5	-0.12817
77.5469	-0.13733
77.5938	-0.13733
77.6562	-0.14343
77.7031	-0.13733
77.75	-0.13123
77.7969	-0.13123
77.8438	-0.13733
77.9062	-0.14648
77.9531	-0.12207
78	-0.12512
78.0469	-0.12207
78.0938	-0.13123
78.1562	-0.12817
78.2031	-0.12512
78.25	-0.11597
78.2969	-0.12207
78.3438	-0.11597
78.4062	-0.10986
78.4531	-0.10986
78.5	-0.11292
78.5469	-0.11292
78.5938	-0.10071
78.6562	-0.0946
78.7031	-0.0885
78.75	-0.08545
78.7969	-0.0824
78.8438	-0.05798
78.9062	-0.05188
78.9531	-0.04883
79	-0.04883
79.0469	-0.05493
79.0938	-0.04272
79.1562	-0.05188
79.2031	-0.06104
79.25	-0.07019
79.2969	-0.07324
79.3438	-0.07935
79.4062	-0.08545
79.4531	-0.08545
79.5	-0.06409
79.5469	-0.05798
79.5938	-0.06104
79.6562	-0.06714
79.7031	-0.07019
79.75	-0.05798
79.7969	-0.06714
79.8438	-0.07019
79.9062	-0.07629
79.9531	-0.07935
80	-0.07324
80.0469	-0.07629
80.0938	-0.07935
80.1562	-0.07629
80.2031	-0.07324
80.25	-0.07019
80.2969	-0.07935
80.3438	-0.08545
80.4062	-0.0824
80.4531	-0.0824
80.5	-0.07629
80.5469	-0.08545
80.5938	-0.09155
80.6562	-0.0824
80.7031	-0.10071
80.75	-0.09766
80.7969	-0.10376
80.8438	-0.08545
80.9062	-0.08545
80.9531	-0.0885
81	-0.0885
81.0469	-0.09155
81.0938	-0.07629
81.1562	-0.08545
81.2031	-0.09155
81.25	-0.0885
81.2969	-0.08545
81.3438	-0.0824
81.4062	-0.0824
81.4531	-0.07935
81.5	-0.08545
81.5469	-0.0885
81.5938	-0.09155
81.6562	-0.0946
81.7031	-0.09155
81.75	-0.09766
81.7969	-0.0885
81.8438	-0.09155
81.9062	-0.09155
81.9531	-0.09155
82	-0.08545
82.0469	-0.09155
82.0938	-0.10986
82.1562	-0.12207
82.2031	-0.12512
82.25	-0.12817
82.2969	-0.12207
82.3438	-0.13428
82.4062	-0.13123
82.4531	-0.13123
82.5	-0.13428
82.5469	-0.14038
82.5938	-0.15259
82.6562	-0.13733
82.7031	-0.14954
82.75	-0.14954
82.7969	-0.15564
82.8438	-0.15259
82.9062	-0.14343
82.9531	-0.14648
83	-0.15259
83.0469	-0.16174
83.0938	-0.14343
83.1562	-0.14954
83.2031	-0.14648
83.25	-0.15564
83.2969	-0.15259
83.3438	-0.15259
83.4062	-0.16479
83.4531	-0.1709
83.5	-0.18311
83.5469	-0.16479
83.5938	-0.17395
83.6562	-0.18005
83.7031	-0.18921
83.75	-0.18921
83.7969	-0.16785
83.8438	-0.16479
83.9062	-0.16479
83.9531	-0.1709
84	-0.15564
84.0469	-0.16174
84.0938	-0.16479
84.1562	-0.16174
84.2031	-0.15564
84.25	-0.14648
84.2969	-0.14343
84.3438	-0.13733
84.4062	-0.14343
84.4531	-0.11902
84.5	-0.11597
84.5469	-0.12207
84.5938	-0.12512
84.6562	-0.12512
84.7031	-0.11597
84.75	-0.10681
84.7969	-0.10681
84.8438	-0.10376
84.9062	-0.08545
84.9531	-0.0824
85	-0.0824
85.0469	-0.0824
85.0938	-0.07324
85.1562	-0.06714
85.2031	-0.06409
85.25	-0.06714
85.2969	-0.07019
85.3438	-0.04578
85.4062	-0.04272
85.4531	-0.04883
85.5	-0.04272
85.5469	-0.03662
85.5938	-0.02747
85.6562	-0.02747
85.7031	-0.03052
85.75	-0.02747
85.7969	-0.01526
85.8438	-0.01526
85.9062	-0.01526
85.9531	-0.02441
86	-0.01831
86.0469	-0.01831
86.0938	-0.02747
86.1562	-0.02747
86.2031	-0.03052
86.25	-0.01221
86.2969	-0.01526
86.3438	-0.01831
86.4062	-0.02441
86.4531	-0.02441
86.5	-0.02136
86.5469	-0.02441
86.5938	-0.03052
86.6562	-0.02441
86.7031	-0.01526
86.75	-0.03052
86.7969	-0.02747
86.8438	-0.03662
86.9062	-0.02747
86.9531	-0.02747
87	-0.02441
87.0469	-0.03357
87.0938	-0.03967
87.1562	-0.03052
87.2031	-0.03052
87.25	-0.03357
87.2969	-0.03967
87.3438	-0.03052
87.4062	-0.03662
87.4531	-0.03662
87.5	-0.04578
87.5469	-0.03662
87.5938	-0.03052
87.6562	-0.03662
87.7031	-0.04272
87.75	-0.03967
87.7969	-0.03662
87.8438	-0.04578
87.9062	-0.04578
87.9531	-0.04272
88	-0.04578
88.0469	-0.03662
88.0938	-0.03967
88.1562	-0.04578
88.2031	-0.03662
88.25	-0.03357
88.2969	-0.03662
88.3438	-0.04883
88.4062	-0.06104
88.4531	-0.05493
88.5	-0.05493
88.5469	-0.05188
88.5938	-0.05493
88.6562	-0.06104
88.7031	-0.04883
88.75	-0.05188
88.7969	-0.05188
88.8438	-0.05493
88.9062	-0.05798
88.9531	-0.06104
89	-0.06104
89.0469	-0.05798
89.0938	-0.05493
89.1562	-0.04272
89.2031	-0.05798
89.25	-0.05798
89.2969	-0.05798
89.3438	-0.04883
89.4062	-0.04272
89.4531	-0.03967
89.5	-0.04272
89.5469	-0.05188
89.5938	-0.05188
89.6562	-0.05493
89.7031	-0.05188
89.75	-0.04272
89.7969	-0.04272
89.8438	-0.04272
89.9062	-0.05493
89.9531	-0.05188
90	-0.05493
90.0469	-0.04883
90.0938	-0.05493
90.1562	-0.06714
90.2031	-0.07324
90.25	-0.07019
90.2969	-0.06714
90.3438	-0.06409
90.4062	-0.07324
90.4531	-0.07629
90.5	-0.06714
90.5469	-0.07019
90.5938	-0.06409
90.6562	-0.06104
90.7031	-0.04578
90.75	-0.04578
90.7969	-0.04883
90.8438	-0.04883
90.9062	-0.03967
90.9531	-0.02136
91	-0.02136
91.0469	-0.02747
91.0938	-0.04272
91.1562	-0.03967
91.2031	-0.04883
91.25	-0.05188
91.2969	-0.05798
91.3438	-0.05493
91.4062	-0.04578
91.4531	-0.06104
91.5	-0.06409
91.5469	-0.07019
91.5938	-0.05188
91.6562	-0.05188
91.7031	-0.05493
91.75	-0.05188
91.7969	-0.05493
91.8438	-0.03967
91.9062	-0.03662
91.9531	-0.03662
92	-0.03967
92.0469	-0.03357
92.0938	-0.03357
92.1562	-0.03662
92.2031	-0.03967
92.25	-0.03967
92.2969	-0.02747
92.3438	-0.03052
92.4062	-0.04272
92.4531	-0.04578
92.5	-0.03052
92.5469	-0.03052
92.5938	-0.03967
92.6562	-0.04883
92.7031	-0.04578
92.75	-0.03052
92.7969	-0.02747
92.8438	-0.03357
92.9062	-0.03357
92.9531	-0.02441
93	-0.03052
93.0469	-0.02441
93.0938	-0.01831
93.1562	0.00305
93.2031	0.02747
93.25	0.02136
93.2969	0.01831
93.3438	0.00916
93.4062	0.02441
93.4531	0.01831
93.5	0.02441
93.5469	0.01221
93.5938	0.01831
93.6562	0.02136
93.7031	0.02747
93.75	0.02441
93.7969	0.01831
93.8438	0.03052
93.9062	0.01526
93.9531	0.01526
94	0.00305
94.0469	0.00916
94.0938	0.00916
94.1562	0.00305
94.2031	-0.00916
94.25	-0.01831
94.2969	0
94.3438	-0.00305
94.4062	-0.00305
94.4531	-0.01221
94.5	-0.0061
94.5469	-0.01526
94.5938	-0.01526
94.6562	-0.02136
94.7031	-0.01526
94.75	-0.00916
94.7969	-0.02136
94.8438	-0.02136
94.9062	-0.04272
94.9531	-0.03052
95	-0.04272
95.0469	-0.04578
95.0938	-0.06104
95.1562	-0.06714
95.2031	-0.06409
95.25	-0.06409
95.2969	-0.06714
95.3438	-0.07019
95.4062	-0.07324
95.4531	-0.07935
95.5	-0.0824
95.5469	-0.09155
95.5938	-0.09155
95.6562	-0.09155
95.7031	-0.0946
95.75	-0.10376
95.7969	-0.11597
95.8438	-0.11597
95.9062	-0.11597
95.9531	-0.12207
96	-0.13428
96.0469	-0.13428
96.0938	-0.13428
96.1562	-0.13428
96.2031	-0.13733
96.25	-0.13733
96.2969	-0.13428
96.3438	-0.13733
96.4062	-0.14648
96.4531	-0.14954
96.5	-0.15259
96.5469	-0.14954
96.5938	-0.14954
96.6562	-0.14343
96.7031	-0.14954
96.75	-0.14038
96.7969	-0.14343
96.8438	-0.14954
96.9062	-0.14954
96.9531	-0.15869
97	-0.14343
97.0469	-0.14648
97.0938	-0.14954
97.1562	-0.15869
97.2031	-0.14648
97.25	-0.14954
97.2969	-0.15259
97.3438	-0.15564
97.4062	-0.14954
97.4531	-0.13428
97.5	-0.13428
97.5469	-0.12512
97.5938	-0.13123
97.6562	-0.10986
97.7031	-0.11292
97.75	-0.11292
97.7969	-0.11597
97.8438	-0.12207
97.9062	-0.11902
97.9531	-0.12207
98	-0.12512
98.0469	-0.11292
98.0938	-0.10681
98.1562	-0.10071
98.2031	-0.09766
98.25	-0.10986
98.2969	-0.11292
98.3438	-0.11292
98.4062	-0.10681
98.4531	-0.10376
98.5	-0.10986
98.5469	-0.0946
98.5938	-0.10986
98.6562	-0.10986
98.7031	-0.11292
98.75	-0.10681
98.7969	-0.11292
98.8438	-0.11597
98.9062	-0.12207
98.9531	-0.11292
99	-0.09766
99.0469	-0.0946
99.0938	-0.10071
99.1562	-0.10681
99.2031	-0.09766
99.25	-0.0946
99.2969	-0.0885
99.3438	-0.08545
99.4062	-0.0824
99.4531	-0.07324
99.5	-0.07629
99.5469	-0.08545
99.5938	-0.09155
99.6562	-0.0885
99.7031	-0.09155
99.75	-0.0885
99.7969	-0.09155
[truncated: 98,004 more rows]

## Sheet: Figure 5 E i down
CON	TRPC6KD
2.48	1.4
2.08	1.25
1.75	1.3
1.82	0.15
3.51	0
1.15	1.91
0.99	0
2.34	1.1
1.01	0.09
0.9	0.1
1.01	0.44
2.69	0.3
2.16	0.2
1.15	0.18
1.45	0.55
2.57	0.4
1.93	0.38
1.95	0.3
1.17	0.07
3.02	0.43
2.15	0.09
1.38	0.1
1.89	0.64
2.5	0.2
0.73	0.34
0.96	0.29
4	0.2
	0.25
	0.2
	0.4
	0.4
	0.44
	0
	0.35
	0.2
	0.69
	0.56

## Sheet: Figure 5 E ii
example trace
TRPC6-KD
Time (ms)	RMP (mV)
0	-0.0824
0.05078	-0.0855
0.10156	-0.0824
0.14844	-0.0824
0.19922	-0.0794
0.25	-0.0732
0.30078	-0.0732
0.35156	-0.0732
0.39844	-0.0763
0.44922	-0.061
0.5	-0.0702
0.55078	-0.0702
0.60156	-0.0794
0.64844	-0.0763
0.69922	-0.0855
0.75	-0.0885
0.80078	-0.0916
0.85156	-0.0916
0.89844	-0.0824
0.94922	-0.09766
1	-0.09766
1.05078	-0.10376
1.10156	-0.0946
1.14844	-0.0946
1.19922	-0.0946
1.25	-0.10681
1.30078	-0.10986
1.35156	-0.10071
1.39844	-0.10071
1.44922	-0.10376
1.5	-0.10681
1.55078	-0.10376
1.60156	-0.10681
1.64844	-0.10986
1.69922	-0.11902
1.75	-0.12207
1.80078	-0.11597
1.85156	-0.11902
1.89844	-0.12512
1.94922	-0.13428
2	-0.12817
2.05078	-0.13123
2.10156	-0.13123
2.14844	-0.13733
2.19922	-0.14038
2.25	-0.12512
2.30078	-0.13123
2.35156	-0.14343
2.39844	-0.15564
2.44922	-0.14648
2.5	-0.15564
2.55078	-0.15259
2.60156	-0.16479
2.64844	-0.16785
2.69922	-0.16785
2.75	-0.17395
2.80078	-0.18005
2.85156	-0.17395
2.89844	-0.16174
2.94922	-0.15259
3	-0.15259
3.05078	-0.15564
3.10156	-0.15259
3.14844	-0.14954
3.19922	-0.15869
3.25	-0.14954
3.30078	-0.15259
3.35156	-0.13428
3.39844	-0.14038
3.44922	-0.14343
3.5	-0.14648
3.55078	-0.13733
3.60156	-0.11597
3.64844	-0.11597
3.69922	-0.11597
3.75	-0.11292
3.80078	-0.10986
3.85156	-0.13123
3.89844	-0.13428
3.94922	-0.13733
4	-0.13428
4.05078	-0.13428
4.10156	-0.12817
4.14844	-0.12817
4.19922	-0.12512
4.25	-0.12512
4.30078	-0.11597
4.35156	-0.10681
4.39844	-0.0946
4.44922	-0.09155
4.5	-0.08545
4.55078	-0.0824
4.60156	-0.06714
4.64844	-0.05798
4.69922	-0.04578
4.75	-0.04578
4.80078	-0.03967
4.85156	-0.04272
4.89844	-0.03357
4.94922	-0.03052
5	-0.03662
5.05078	-0.03967
5.10156	-0.03662
5.14844	-0.02136
5.19922	-0.02747
5.25	-0.03052
5.30078	-0.04272
5.35156	-0.03662
5.39844	-0.04272
5.44922	-0.04578
5.5	-0.05188
5.55078	-0.04883
5.60156	-0.03357
5.64844	-0.03967
5.69922	-0.04272
5.75	-0.03967
5.80078	-0.03662
5.85156	-0.02747
5.89844	-0.03357
5.94922	-0.03967
6	-0.03967
6.05078	-0.02136
6.10156	-0.03357
6.14844	-0.03662
6.19922	-0.03052
6.25	-0.02136
6.30078	-0.02747
6.35156	-0.01526
6.39844	-0.01526
6.44922	-0.01221
6.5	-0.00305
6.55078	-0.01526
6.60156	-0.02441
6.64844	-0.03357
6.69922	-0.02747
6.75	-0.02136
6.80078	-0.03662
6.85156	-0.03967
6.89844	-0.04272
6.94922	-0.02441
7	-0.03662
7.05078	-0.03967
7.10156	-0.04883
7.14844	-0.03052
7.19922	-0.02747
7.25	-0.02747
7.30078	-0.03662
7.35156	-0.03357
7.39844	-0.02136
7.44922	-0.03662
7.5	-0.03662
7.55078	-0.04578
7.60156	-0.03052
7.64844	-0.04578
7.69922	-0.05798
7.75	-0.07629
7.80078	-0.07629
7.85156	-0.07935
7.89844	-0.0824
7.94922	-0.0885
8	-0.07935
8.05078	-0.07019
8.10156	-0.07324
8.14844	-0.06714
8.19922	-0.06409
8.25	-0.06409
8.30078	-0.05493
8.35156	-0.06104
8.39844	-0.05493
8.44922	-0.06409
8.5	-0.05188
8.55078	-0.06714
8.60156	-0.07019
8.64844	-0.07324
8.69922	-0.06409
8.75	-0.04578
8.80078	-0.03967
8.85156	-0.04272
8.89844	-0.03357
8.94922	-0.02747
9	-0.02747
9.05078	-0.02441
9.10156	-0.02747
9.14844	-0.02441
9.19922	-0.01831
9.25	-0.02747
9.30078	-0.02441
9.35156	-0.03052
9.39844	-0.02441
9.44922	-0.03967
9.5	-0.04883
9.55078	-0.04883
9.60156	-0.04272
9.64844	-0.03357
9.69922	-0.03967
9.75	-0.03967
9.80078	-0.04272
9.85156	-0.02747
9.89844	-0.03357
9.94922	-0.03052
10	-0.03662
10.0508	-0.03357
10.1016	-0.04272
10.1484	-0.04883
10.1992	-0.05798
10.25	-0.05798
10.3008	-0.04883
10.3516	-0.05493
10.3984	-0.05188
10.4492	-0.05493
10.5	-0.04578
10.5508	-0.05188
10.6016	-0.05493
10.6484	-0.06104
10.6992	-0.05798
10.75	-0.04578
10.8008	-0.04272
10.8516	-0.04272
10.8984	-0.04883
10.9492	-0.04883
11	-0.04578
11.0508	-0.04883
11.1016	-0.05188
11.1484	-0.04883
11.1992	-0.03052
11.25	-0.03662
11.3008	-0.03662
11.3516	-0.03967
11.3984	-0.02441
11.4492	-0.01831
11.5	-0.02136
11.5508	-0.01526
11.6016	-0.01221
11.6484	0.00305
11.6992	-0.0061
11.75	-0.01221
11.8008	-0.02136
11.8516	-0.01221
11.8984	-0.02136
11.9492	-0.01831
12	-0.01831
12.0508	-0.00916
12.1016	0.0061
12.1484	0.00916
12.1992	0.01221
12.25	0.01526
12.3008	0.02747
12.3516	0.02441
12.3984	0.02747
12.4492	0.02747
12.5	0.02441
12.5508	0.02441
12.6016	0.01526
12.6484	0.00916
12.6992	0
12.75	0.00305
12.8008	0.0061
12.8516	0.01221
12.8984	0.0061
12.9492	0
13	-0.00305
13.0508	-0.00305
13.1016	0
13.1484	0.0061
13.1992	0.0061
13.25	0.00916
13.3008	0.00916
13.3516	0.0061
13.3984	-0.00305
13.4492	0.0061
13.5	0.0061
13.5508	0.00916
13.6016	0.0061
13.6484	0.01831
13.6992	0.01221
13.75	0.01221
13.8008	-0.00305
13.8516	-0.00916
13.8984	-0.00916
13.9492	-0.0061
14	-0.0061
14.0508	-0.0061
14.1016	0
14.1484	-0.01526
14.1992	-0.02441
14.25	-0.03967
14.3008	-0.04578
14.3516	-0.04272
14.3984	-0.04883
14.4492	-0.05188
14.5	-0.05798
14.5508	-0.04883
14.6016	-0.06104
14.6484	-0.06104
14.6992	-0.07019
14.75	-0.06714
14.8008	-0.06409
14.8516	-0.06409
14.8984	-0.07324
14.9492	-0.07935
15	-0.07019
15.0508	-0.07935
15.1016	-0.07935
15.1484	-0.08545
15.1992	-0.06714
15.25	-0.06714
15.3008	-0.06714
15.3516	-0.07629
15.3984	-0.07629
15.4492	-0.07324
15.5	-0.07935
15.5508	-0.09766
15.6016	-0.10071
15.6484	-0.10376
15.6992	-0.10376
15.75	-0.11597
15.8008	-0.11292
15.8516	-0.11597
15.8984	-0.10071
15.9492	-0.10986
16	-0.10986
16.0508	-0.12207
16.1016	-0.11597
16.1484	-0.12512
16.1992	-0.13123
16.25	-0.14038
16.3008	-0.13428
16.3516	-0.12817
16.3984	-0.12512
16.4492	-0.13428
16.5	-0.14038
16.5508	-0.13123
16.6016	-0.13733
16.6484	-0.13428
16.6992	-0.13733
16.75	-0.13733
16.8008	-0.13123
16.8516	-0.13428
16.8984	-0.13733
16.9492	-0.13428
17	-0.12207
17.0508	-0.11902
17.1016	-0.11902
17.1484	-0.12207
17.1992	-0.11292
17.25	-0.10986
17.3008	-0.10986
17.3516	-0.10681
17.3984	-0.11292
17.4492	-0.09766
17.5	-0.10071
17.5508	-0.10071
17.6016	-0.10376
17.6484	-0.10376
17.6992	-0.10071
17.75	-0.11292
17.8008	-0.11902
17.8516	-0.11902
17.8984	-0.10376
17.9492	-0.09766
18	-0.0946
18.0508	-0.0885
18.1016	-0.07935
18.1484	-0.06714
18.1992	-0.06714
18.25	-0.07324
18.3008	-0.07629
18.3516	-0.05798
18.3984	-0.05798
18.4492	-0.05188
18.5	-0.05798
18.5508	-0.05798
18.6016	-0.05493
18.6484	-0.05798
18.6992	-0.06104
18.75	-0.05493
18.8008	-0.05188
18.8516	-0.04883
18.8984	-0.06104
18.9492	-0.06409
19	-0.06104
19.0508	-0.05188
19.1016	-0.07019
19.1484	-0.06409
19.1992	-0.06409
19.25	-0.04883
19.3008	-0.05493
19.3516	-0.06104
19.3984	-0.07019
19.4492	-0.06714
19.5	-0.05798
19.5508	-0.06409
19.6016	-0.06409
19.6484	-0.07019
19.6992	-0.04883
19.75	-0.06104
19.8008	-0.06409
19.8516	-0.06714
19.8984	-0.06409
19.9492	-0.06104
20	-0.06714
20.0508	-0.07324
20.1016	-0.07324
20.1484	-0.06104
20.1992	-0.06714
20.25	-0.07629
20.3008	-0.08545
20.3516	-0.06714
20.3984	-0.05798
20.4492	-0.05188
20.5	-0.05493
20.5508	-0.04272
20.6016	-0.05493
20.6484	-0.05798
20.6992	-0.06104
20.75	-0.05493
20.8008	-0.05798
20.8516	-0.06104
20.8984	-0.05798
20.9492	-0.06104
21	-0.06714
21.0508	-0.07324
21.1016	-0.07935
21.1484	-0.08545
21.1992	-0.0824
21.25	-0.0885
21.3008	-0.0946
21.3516	-0.10071
21.3984	-0.10071
21.4492	-0.10986
21.5	-0.0946
21.5508	-0.10376
21.6016	-0.09766
21.6484	-0.10681
21.6992	-0.10071
21.75	-0.10986
21.8008	-0.11292
21.8516	-0.12207
21.8984	-0.12512
21.9492	-0.11902
22	-0.12207
22.0508	-0.13428
22.1016	-0.14038
22.1484	-0.14343
22.1992	-0.14954
22.25	-0.15564
22.3008	-0.16479
22.3516	-0.16174
22.3984	-0.15564
22.4492	-0.15564
22.5	-0.15564
22.5508	-0.14954
22.6016	-0.13733
22.6484	-0.13733
22.6992	-0.14343
22.75	-0.13733
22.8008	-0.14038
22.8516	-0.13428
22.8984	-0.14038
22.9492	-0.14648
23	-0.15259
23.0508	-0.14954
23.1016	-0.15259
23.1484	-0.15259
23.1992	-0.15564
23.25	-0.14954
23.3008	-0.14648
23.3516	-0.14648
23.3984	-0.16174
23.4492	-0.15869
23.5	-0.14343
23.5508	-0.14343
23.6016	-0.14343
23.6484	-0.14038
23.6992	-0.12817
23.75	-0.11902
23.8008	-0.12817
23.8516	-0.13123
23.8984	-0.13428
23.9492	-0.11292
24	-0.11902
24.0508	-0.11597
24.1016	-0.12512
24.1484	-0.12207
24.1992	-0.11902
24.25	-0.11902
24.3008	-0.12207
24.3516	-0.11597
24.3984	-0.10071
24.4492	-0.09766
24.5	-0.10071
24.5508	-0.0946
24.6016	-0.09155
24.6484	-0.08545
24.6992	-0.0824
24.75	-0.0824
24.8008	-0.07629
24.8516	-0.06104
24.8984	-0.05798
24.9492	-0.05493
25	-0.05493
25.0508	-0.03357
25.1016	-0.03052
25.1484	-0.03052
25.1992	-0.03052
25.25	-0.02747
25.3008	-0.02441
25.3516	-0.03967
25.3984	-0.04578
25.4492	-0.04883
25.5	-0.03662
25.5508	-0.03357
25.6016	-0.03052
25.6484	-0.03052
25.6992	-0.02747
25.75	-0.01221
25.8008	-0.01831
25.8516	-0.01526
25.8984	-0.01221
25.9492	0.0061
26	0.00916
26.0508	0.01526
26.1016	0.0061
26.1484	0.01221
26.1992	0.01831
26.25	0.02441
26.3008	0.00916
26.3516	0.01221
26.3984	0.01526
26.4492	0.01221
26.5	0
26.5508	-0.0061
26.6016	-0.01831
26.6484	-0.00916
26.6992	-0.01831
26.75	-0.02136
26.8008	-0.02747
26.8516	-0.01221
26.8984	-0.02747
26.9492	-0.03662
27	-0.04578
27.0508	-0.05493
27.1016	-0.03967
27.1484	-0.05493
27.1992	-0.05493
27.25	-0.06409
27.3008	-0.05493
27.3516	-0.07019
27.3984	-0.07629
27.4492	-0.0885
27.5	-0.0824
27.5508	-0.07629
27.6016	-0.06714
27.6484	-0.06714
27.6992	-0.06714
27.75	-0.05188
27.8008	-0.06714
27.8516	-0.06409
27.8984	-0.06409
27.9492	-0.05493
28	-0.03662
28.0508	-0.03052
28.1016	-0.03967
28.1484	-0.03967
28.1992	-0.03357
28.25	-0.04272
28.3008	-0.04883
28.3516	-0.04883
28.3984	-0.04578
28.4492	-0.03967
28.5	-0.05798
28.5508	-0.06409
28.6016	-0.07019
28.6484	-0.06409
28.6992	-0.07324
28.75	-0.07324
28.8008	-0.08545
28.8516	-0.08545
28.8984	-0.08545
28.9492	-0.0885
29	-0.09155
29.0508	-0.0946
29.1016	-0.0824
29.1484	-0.09155
29.1992	-0.0824
29.25	-0.0824
29.3008	-0.07935
29.3516	-0.07629
29.3984	-0.07935
29.4492	-0.09155
29.5	-0.0885
29.5508	-0.08545
29.6016	-0.07935
29.6484	-0.07629
29.6992	-0.07629
29.75	-0.07935
29.8008	-0.07629
29.8516	-0.07324
29.8984	-0.06409
29.9492	-0.06409
30	-0.05188
30.0508	-0.04578
30.1016	-0.04272
30.1484	-0.04883
30.1992	-0.04578
30.25	-0.04883
30.3008	-0.06104
30.3516	-0.06104
30.3984	-0.05798
30.4492	-0.04578
30.5	-0.05493
30.5508	-0.05493
30.6016	-0.06409
30.6484	-0.05188
30.6992	-0.05188
30.75	-0.04578
30.8008	-0.05188
30.8516	-0.04578
30.8984	-0.03662
30.9492	-0.03662
31	-0.03967
31.0508	-0.03967
31.1016	-0.02441
31.1484	-0.02136
31.1992	-0.02136
31.25	-0.02747
31.3008	-0.02136
31.3516	-0.00916
31.3984	-0.00916
31.4492	-0.01221
31.5	-0.00916
31.5508	-0.0061
31.6016	-0.00916
31.6484	-0.0061
31.6992	-0.00916
31.75	-0.00305
31.8008	0.00916
31.8516	0.00305
31.8984	-0.00305
31.9492	-0.00916
32	0
32.0508	-0.0061
32.1016	-0.01221
32.1484	-0.02136
32.1992	-0.01831
32.25	-0.01221
32.3008	-0.01526
32.3516	-0.01831
32.3984	-0.01526
32.4492	0.00916
32.5	0.00305
32.5508	0.0061
32.6016	0
32.6484	0.01526
32.6992	0.02136
32.75	0.03357
32.8008	0.04272
32.8516	0.04578
32.8984	0.05493
32.9492	0.04578
33	0.03967
33.0508	0.03357
33.1016	0.03662
33.1484	0.03967
33.1992	0.03357
33.25	0.02441
33.3008	0.02441
33.3516	0.03967
33.3984	0.03662
33.4492	0.03662
33.5	0.02747
33.5508	0.03662
33.6016	0.03662
33.6484	0.03357
33.6992	0.02747
33.75	0.01831
33.8008	0.03357
33.8516	0.01831
33.8984	0.00916
33.9492	0
34	0.0061
34.0508	0.00305
34.1016	0.00305
34.1484	0
34.1992	0.00305
34.25	0.00916
34.3008	-0.00305
34.3516	-0.01526
34.3984	-0.02136
34.4492	-0.02441
34.5	-0.02136
34.5508	-0.03357
34.6016	-0.03967
34.6484	-0.05493
34.6992	-0.05188
34.75	-0.06409
34.8008	-0.07019
34.8516	-0.0824
34.8984	-0.07935
34.9492	-0.08545
35	-0.08545
35.0508	-0.0885
35.1016	-0.08545
35.1484	-0.07324
35.1992	-0.07629
35.25	-0.0824
35.3008	-0.0946
35.3516	-0.0885
35.3984	-0.09766
35.4492	-0.10376
35.5	-0.11292
35.5508	-0.11902
35.6016	-0.10986
35.6484	-0.10376
35.6992	-0.11902
35.75	-0.11902
35.8008	-0.11902
35.8516	-0.12207
35.8984	-0.12817
35.9492	-0.13123
36	-0.12207
36.0508	-0.10986
36.1016	-0.12207
36.1484	-0.12207
36.1992	-0.12512
36.25	-0.10986
36.3008	-0.12207
36.3516	-0.12207
36.3984	-0.11902
36.4492	-0.11902
36.5	-0.11292
36.5508	-0.11597
36.6016	-0.11597
36.6484	-0.11292
36.6992	-0.10681
36.75	-0.10986
36.8008	-0.11292
36.8516	-0.11902
36.8984	-0.11902
36.9492	-0.10376
37	-0.11902
37.0508	-0.11902
37.1016	-0.11597
37.1484	-0.09155
37.1992	-0.09766
37.25	-0.0946
37.3008	-0.0885
37.3516	-0.08545
37.3984	-0.08545
37.4492	-0.08545
37.5	-0.0824
37.5508	-0.0824
37.6016	-0.07629
37.6484	-0.07629
37.6992	-0.07324
37.75	-0.07324
37.8008	-0.07324
37.8516	-0.07935
37.8984	-0.08545
37.9492	-0.0885
38	-0.09155
38.0508	-0.09155
38.1016	-0.0885
38.1484	-0.0946
38.1992	-0.0946
38.25	-0.0885
38.3008	-0.07324
38.3516	-0.07629
38.3984	-0.06714
38.4492	-0.06714
38.5	-0.06104
38.5508	-0.07629
38.6016	-0.07629
38.6484	-0.07629
38.6992	-0.06409
38.75	-0.06409
38.8008	-0.06409
38.8516	-0.06409
38.8984	-0.05493
38.9492	-0.04272
39	-0.04578
39.0508	-0.04272
39.1016	-0.04578
39.1484	-0.03967
39.1992	-0.04272
39.25	-0.04272
39.3008	-0.04272
39.3516	-0.03967
39.3984	-0.03662
39.4492	-0.04883
39.5	-0.05798
39.5508	-0.04578
39.6016	-0.04272
39.6484	-0.04578
39.6992	-0.04883
39.75	-0.05188
39.8008	-0.05798
39.8516	-0.04578
39.8984	-0.05493
39.9492	-0.05798
40	-0.06409
40.0508	-0.06409
40.1016	-0.06714
40.1484	-0.0824
40.1992	-0.0885
40.25	-0.09766
40.3008	-0.0824
40.3516	-0.0885
40.3984	-0.09155
40.4492	-0.09766
40.5	-0.0824
40.5508	-0.07935
40.6016	-0.0824
40.6484	-0.08545
40.6992	-0.07935
40.75	-0.05493
40.8008	-0.06409
40.8516	-0.06714
40.8984	-0.07935
40.9492	-0.07019
41	-0.07935
41.0508	-0.0824
41.1016	-0.09155
41.1484	-0.0824
41.1992	-0.07019
41.25	-0.07019
41.3008	-0.0824
41.3516	-0.08545
41.3984	-0.0885
41.4492	-0.0946
41.5	-0.10376
41.5508	-0.11292
41.6016	-0.10986
41.6484	-0.10681
41.6992	-0.10986
41.75	-0.12207
41.8008	-0.12817
41.8516	-0.11902
41.8984	-0.12207
41.9492	-0.12817
42	-0.12817
42.0508	-0.13123
42.1016	-0.12512
42.1484	-0.14343
42.1992	-0.14954
42.25	-0.16174
42.3008	-0.15259
42.3516	-0.16479
42.3984	-0.16174
42.4492	-0.16785
42.5	-0.16174
42.5508	-0.15564
42.6016	-0.15259
42.6484	-0.16174
42.6992	-0.15869
42.75	-0.14954
42.8008	-0.15564
42.8516	-0.1709
42.8984	-0.177
42.9492	-0.18005
43	-0.177
43.0508	-0.177
43.1016	-0.17395
43.1484	-0.177
43.1992	-0.15564
43.25	-0.15564
43.3008	-0.14954
43.3516	-0.14648
43.3984	-0.14038
43.4492	-0.14038
43.5	-0.14038
43.5508	-0.13733
43.6016	-0.13123
43.6484	-0.11292
43.6992	-0.11902
43.75	-0.11902
43.8008	-0.12817
43.8516	-0.11902
43.8984	-0.12207
43.9492	-0.11597
44	-0.11902
44.0508	-0.12512
44.1016	-0.11597
44.1484	-0.11902
44.1992	-0.11902
44.25	-0.11902
44.3008	-0.10986
44.3516	-0.10071
44.3984	-0.10071
44.4492	-0.09155
44.5	-0.0946
44.5508	-0.07324
44.6016	-0.07629
44.6484	-0.07019
44.6992	-0.07019
44.75	-0.05493
44.8008	-0.04883
44.8516	-0.03967
44.8984	-0.04883
44.9492	-0.03967
45	-0.03052
45.0508	-0.03357
45.1016	-0.03357
45.1484	-0.03357
45.1992	-0.02747
45.25	-0.03052
45.3008	-0.02747
45.3516	-0.02441
45.3984	-0.01831
45.4492	0.00305
45.5	-0.00305
45.5508	0.00305
45.6016	0
45.6484	0.01526
45.6992	0.01221
45.75	0.00916
45.8008	-0.00305
45.8516	-0.00305
45.8984	0.00305
45.9492	0
46	0
46.0508	0
46.1016	-0.0061
46.1484	-0.00305
46.1992	-0.00305
46.25	-0.00305
46.3008	0.00305
46.3516	0.01221
46.3984	0.01831
46.4492	0.01831
46.5	0.01526
46.5508	0.00916
46.6016	0.01221
46.6484	0.00916
46.6992	0.01526
46.75	0.00916
46.8008	0.01221
46.8516	0.0061
46.8984	-0.00305
46.9492	-0.01221
47	-0.0061
47.0508	-0.01526
47.1016	-0.01526
47.1484	-0.02136
47.1992	-0.00916
47.25	0
47.3008	-0.00305
47.3516	-0.00305
47.3984	-0.00916
47.4492	0
47.5	-0.01221
47.5508	-0.01831
47.6016	-0.03357
47.6484	-0.03357
47.6992	-0.03967
47.75	-0.04578
47.8008	-0.05798
47.8516	-0.05798
47.8984	-0.05188
47.9492	-0.05493
48	-0.04883
48.0508	-0.05493
48.1016	-0.04272
48.1484	-0.04578
48.1992	-0.04578
48.25	-0.05798
48.3008	-0.05798
48.3516	-0.04883
48.3984	-0.05188
48.4492	-0.05798
48.5	-0.06104
48.5508	-0.05798
48.6016	-0.04883
48.6484	-0.05493
48.6992	-0.05798
48.75	-0.06714
48.8008	-0.04883
48.8516	-0.05493
48.8984	-0.05188
48.9492	-0.05493
49	-0.03967
49.0508	-0.03967
49.1016	-0.04272
49.1484	-0.05188
49.1992	-0.03967
49.25	-0.02747
49.3008	-0.04272
49.3516	-0.04578
49.3984	-0.05188
49.4492	-0.04272
49.5	-0.05188
49.5508	-0.04578
49.6016	-0.05493
49.6484	-0.05493
49.6992	-0.04578
49.75	-0.04578
49.8008	-0.05493
49.8516	-0.05493
49.8984	-0.05493
49.9492	-0.05798
50	-0.06409
50.0508	-0.06409
50.1016	-0.06104
50.1484	-0.05188
50.1992	-0.05188
50.25	-0.05188
50.3008	-0.04883
50.3516	-0.03357
50.3984	-0.02747
50.4492	-0.02747
50.5	-0.02136
50.5508	-0.02747
50.6016	-0.01831
50.6484	-0.03052
50.6992	-0.03662
50.75	-0.03052
50.8008	-0.01526
50.8516	-0.01526
50.8984	-0.02441
50.9492	-0.03357
51	-0.03357
51.0508	-0.02441
51.1016	-0.03052
51.1484	-0.03052
51.1992	-0.03052
51.25	-0.01831
51.3008	-0.03052
51.3516	-0.02747
51.3984	-0.03662
51.4492	-0.03052
51.5	-0.02136
51.5508	-0.02441
51.6016	-0.02747
51.6484	-0.02441
51.6992	-0.01831
51.75	-0.02136
51.8008	-0.02441
51.8516	-0.02747
51.8984	-0.01831
51.9492	-0.00916
52	-0.01221
52.0508	-0.00916
52.1016	-0.01221
52.1484	0.00305
52.1992	0
52.25	0.00305
52.3008	-0.01221
52.3516	-0.00305
52.3984	-0.00305
52.4492	-0.01526
52.5	-0.0061
52.5508	-0.0061
52.6016	0.0061
52.6484	0.00305
52.6992	0
52.75	0
52.8008	0.0061
52.8516	0.00916
52.8984	0.0061
52.9492	0.00305
53	-0.00305
53.0508	0.01526
53.1016	0.00916
53.1484	0.0061
53.1992	0.00916
53.25	0.01526
53.3008	0.01221
53.3516	0.01221
53.3984	0
53.4492	0
53.5	0.0061
53.5508	-0.0061
53.6016	-0.01221
53.6484	-0.01526
53.6992	-0.01526
53.75	-0.01831
53.8008	-0.03357
53.8516	-0.03052
53.8984	-0.03357
53.9492	-0.03052
54	-0.04578
54.0508	-0.05188
54.1016	-0.06104
54.1484	-0.06409
54.1992	-0.06714
54.25	-0.05798
54.3008	-0.05493
54.3516	-0.04272
54.3984	-0.03052
54.4492	-0.03357
54.5	-0.03357
54.5508	-0.03052
54.6016	-0.03967
54.6484	-0.05188
54.6992	-0.06104
54.75	-0.06104
54.8008	-0.07019
54.8516	-0.06714
54.8984	-0.0824
54.9492	-0.09766
55	-0.10376
55.0508	-0.10376
55.1016	-0.10681
55.1484	-0.10071
55.1992	-0.10986
55.25	-0.11597
55.3008	-0.11292
55.3516	-0.12817
55.3984	-0.14038
55.4492	-0.13428
55.5	-0.11902
55.5508	-0.11597
55.6016	-0.10986
55.6484	-0.11597
55.6992	-0.11292
55.75	-0.11292
55.8008	-0.11902
55.8516	-0.12207
55.8984	-0.12512
55.9492	-0.11597
56	-0.11597
56.0508	-0.12512
56.1016	-0.12512
56.1484	-0.12512
56.1992	-0.11597
56.25	-0.12207
56.3008	-0.11597
56.3516	-0.11292
56.3984	-0.10376
56.4492	-0.10681
56.5	-0.10071
56.5508	-0.10986
56.6016	-0.09766
56.6484	-0.09155
56.6992	-0.0946
56.75	-0.0946
56.8008	-0.0946
56.8516	-0.0824
56.8984	-0.0824
56.9492	-0.0946
57	-0.0946
57.0508	-0.09155
57.1016	-0.07935
57.1484	-0.07935
57.1992	-0.07935
57.25	-0.0824
57.3008	-0.06409
57.3516	-0.07629
57.3984	-0.07935
57.4492	-0.09155
57.5	-0.07935
57.5508	-0.07629
57.6016	-0.07629
57.6484	-0.07629
57.6992	-0.07629
57.75	-0.06104
57.8008	-0.06409
57.8516	-0.07019
57.8984	-0.06104
57.9492	-0.05798
58	-0.04883
58.0508	-0.05798
58.1016	-0.07019
58.1484	-0.0824
58.1992	-0.07935
58.25	-0.0885
58.3008	-0.0946
58.3516	-0.10071
58.3984	-0.07935
58.4492	-0.08545
58.5	-0.0885
58.5508	-0.10376
58.6016	-0.10681
58.6484	-0.09766
58.6992	-0.10681
58.75	-0.10986
58.8008	-0.10681
58.8516	-0.09766
58.8984	-0.0946
58.9492	-0.10071
59	-0.09766
59.0508	-0.10376
59.1016	-0.08545
59.1484	-0.08545
59.1992	-0.07935
59.25	-0.0824
59.3008	-0.07935
59.3516	-0.07935
59.3984	-0.08545
59.4492	-0.0885
59.5	-0.08545
59.5508	-0.07019
59.6016	-0.07324
59.6484	-0.07019
59.6992	-0.07629
59.75	-0.06714
59.8008	-0.07629
59.8516	-0.0824
59.8984	-0.0946
59.9492	-0.09766
60	-0.0885
60.0508	-0.09155
60.1016	-0.0885
60.1484	-0.09766
60.1992	-0.09155
60.25	-0.09766
60.3008	-0.0885
60.3516	-0.09155
60.3984	-0.07935
60.4492	-0.07935
60.5	-0.08545
60.5508	-0.08545
60.6016	-0.0885
60.6484	-0.07935
60.6992	-0.07629
60.75	-0.07935
60.8008	-0.0824
60.8516	-0.07935
60.8984	-0.07324
60.9492	-0.08545
61	-0.0946
61.0508	-0.10071
61.1016	-0.10071
61.1484	-0.10681
61.1992	-0.10681
61.25	-0.11292
61.3008	-0.10681
61.3516	-0.09766
61.3984	-0.10376
61.4492	-0.10071
61.5	-0.10986
61.5508	-0.08545
61.6016	-0.09766
61.6484	-0.10071
61.6992	-0.11902
61.75	-0.11902
61.8008	-0.12512
61.8516	-0.13123
61.8984	-0.14648
61.9492	-0.14648
62	-0.14038
62.0508	-0.14954
62.1016	-0.15869
62.1484	-0.15869
62.1992	-0.16174
62.25	-0.15564
62.3008	-0.16785
62.3516	-0.16785
62.3984	-0.177
62.4492	-0.15869
62.5	-0.17395
62.5508	-0.17395
62.6016	-0.18005
62.6484	-0.18311
62.6992	-0.18311
62.75	-0.1709
62.8008	-0.17395
62.8516	-0.18311
62.8984	-0.19226
62.9492	-0.18616
63	-0.18616
63.0508	-0.177
63.1016	-0.177
63.1484	-0.1709
63.1992	-0.1709
63.25	-0.16174
63.3008	-0.16479
63.3516	-0.15259
63.3984	-0.15564
63.4492	-0.15259
63.5	-0.15869
63.5508	-0.14648
63.6016	-0.14648
63.6484	-0.13428
63.6992	-0.14648
63.75	-0.14648
63.8008	-0.13733
63.8516	-0.14038
63.8984	-0.14343
63.9492	-0.13733
64	-0.12512
64.0508	-0.11902
64.1016	-0.12512
64.1484	-0.12512
64.1992	-0.12512
64.25	-0.10986
64.3008	-0.10986
64.3516	-0.10681
64.3984	-0.10376
64.4492	-0.0885
64.5	-0.08545
64.5508	-0.08545
64.6016	-0.08545
64.6484	-0.07324
64.6992	-0.06104
64.75	-0.05188
64.8008	-0.04272
64.8516	-0.04578
64.8984	-0.03967
64.9492	-0.04578
65	-0.04578
65.0508	-0.04578
65.1016	-0.03967
65.1484	-0.02441
65.1992	-0.02747
65.25	-0.03357
65.3008	-0.03662
65.3516	-0.03662
65.3984	-0.03357
65.4492	-0.03967
65.5	-0.03662
65.5508	-0.04272
65.6016	-0.03052
65.6484	-0.03662
65.6992	-0.03967
65.75	-0.04883
65.8008	-0.04272
65.8516	-0.05188
65.8984	-0.04272
65.9492	-0.03662
66	-0.02136
66.0508	-0.01221
66.1016	-0.01526
66.1484	-0.02441
66.1992	-0.03052
66.25	-0.02747
66.3008	-0.03052
66.3516	-0.03052
66.3984	-0.03052
66.4492	-0.02441
66.5	-0.01831
66.5508	-0.01831
66.6016	-0.02441
66.6484	-0.02441
66.6992	-0.01221
66.75	-0.01221
66.8008	-0.01526
66.8516	-0.01831
66.8984	-0.01831
66.9492	-0.01526
67	-0.02747
67.0508	-0.03357
67.1016	-0.03357
67.1484	-0.01221
67.1992	-0.01526
67.25	-0.01831
67.3008	-0.02136
67.3516	-0.02747
67.3984	-0.02441
67.4492	-0.03662
67.5	-0.03967
67.5508	-0.04883
67.6016	-0.03357
67.6484	-0.04578
67.6992	-0.05188
67.75	-0.04883
67.8008	-0.04578
67.8516	-0.04578
67.8984	-0.04578
67.9492	-0.03357
68	-0.01831
68.0508	0.00916
68.1016	0.01526
68.1484	0.01526
68.1992	0.0061
68.25	0.0061
68.3008	-0.0061
68.3516	-0.00305
68.3984	-0.02136
68.4492	-0.02747
68.5	-0.03662
68.5508	-0.05188
68.6016	-0.05798
68.6484	-0.06714
68.6992	-0.05798
68.75	-0.05798
68.8008	-0.05188
68.8516	-0.05188
68.8984	-0.05798
68.9492	-0.04272
69	-0.04272
69.0508	-0.05188
69.1016	-0.05493
69.1484	-0.04883
69.1992	-0.04272
69.25	-0.04272
69.3008	-0.04578
69.3516	-0.03662
69.3984	-0.02747
69.4492	-0.03052
69.5	-0.03357
69.5508	-0.03357
69.6016	-0.02747
69.6484	-0.03052
69.6992	-0.03967
69.75	-0.04578
69.8008	-0.04578
69.8516	-0.03357
69.8984	-0.05188
69.9492	-0.04578
70	-0.05188
70.0508	-0.03662
70.1016	-0.03967
70.1484	-0.04578
70.1992	-0.05493
70.25	-0.04883
70.3008	-0.03967
70.3516	-0.04578
70.3984	-0.04883
70.4492	-0.05188
70.5	-0.04578
70.5508	-0.06409
70.6016	-0.07019
70.6484	-0.07019
70.6992	-0.06714
70.75	-0.06409
70.8008	-0.05798
70.8516	-0.05798
70.8984	-0.06104
70.9492	-0.06104
71	-0.06104
71.0508	-0.06409
71.1016	-0.05493
71.1484	-0.05493
71.1992	-0.04578
71.25	-0.04883
71.3008	-0.04578
71.3516	-0.03967
71.3984	-0.03357
71.4492	-0.03662
71.5	-0.03357
71.5508	-0.03662
71.6016	-0.02747
71.6484	-0.02136
71.6992	-0.01831
71.75	-0.01831
71.8008	-0.00916
71.8516	0.01221
71.8984	0.01221
71.9492	0.00916
72	0.01831
72.0508	0.02747
72.1016	0.03052
72.1484	0.02747
72.1992	0.02136
72.25	0.01526
72.3008	0.03052
72.3516	0.02136
72.3984	0.03052
72.4492	0.03662
72.5	0.05188
72.5508	0.05188
72.6016	0.05493
72.6484	0.05188
72.6992	0.06104
72.75	0.06714
72.8008	0.05493
72.8516	0.04578
72.8984	0.04883
72.9492	0.04272
73	0.04272
73.0508	0.03357
73.1016	0.02747
73.1484	0.02747
73.1992	0.04578
73.25	0.03052
73.3008	0.02441
73.3516	0.01221
73.3984	0.00916
73.4492	0.00916
73.5	0.00305
73.5508	-0.00305
73.6016	0
73.6484	0.01831
73.6992	0.01221
73.75	0.0061
73.8008	0.00305
73.8516	0.0061
73.8984	0.00916
73.9492	-0.00305
74	-0.00916
74.0508	-0.01526
74.1016	-0.0061
74.1484	-0.01831
74.1992	-0.02441
74.25	-0.03357
74.3008	-0.03052
74.3516	-0.03662
74.3984	-0.04272
74.4492	-0.04578
74.5	-0.04883
74.5508	-0.04578
74.6016	-0.05798
74.6484	-0.05493
74.6992	-0.05493
74.75	-0.03967
74.8008	-0.03967
74.8516	-0.04272
74.8984	-0.05798
74.9492	-0.06409
75	-0.06714
75.0508	-0.07935
75.1016	-0.0946
75.1484	-0.10681
75.1992	-0.09766
75.25	-0.10376
75.3008	-0.10681
75.3516	-0.11597
75.3984	-0.11597
75.4492	-0.11292
75.5	-0.11597
75.5508	-0.11597
75.6016	-0.11292
75.6484	-0.09766
75.6992	-0.10071
75.75	-0.10681
75.8008	-0.10681
75.8516	-0.10681
75.8984	-0.10376
75.9492	-0.10376
76	-0.10986
76.0508	-0.11292
76.1016	-0.09766
76.1484	-0.10681
76.1992	-0.10986
76.25	-0.11292
76.3008	-0.10986
76.3516	-0.10071
76.3984	-0.10376
76.4492	-0.10986
76.5	-0.11292
76.5508	-0.10376
76.6016	-0.11902
76.6484	-0.12512
76.6992	-0.13123
76.75	-0.12207
76.8008	-0.11597
76.8516	-0.10681
76.8984	-0.11597
76.9492	-0.11292
77	-0.09766
77.0508	-0.0946
77.1016	-0.0885
77.1484	-0.07935
77.1992	-0.0824
77.25	-0.0824
77.3008	-0.0946
77.3516	-0.10681
77.3984	-0.10986
77.4492	-0.10071
77.5	-0.09766
77.5508	-0.09766
77.6016	-0.0946
77.6484	-0.09155
77.6992	-0.09155
77.75	-0.0946
77.8008	-0.10376
77.8516	-0.10986
77.8984	-0.10376
77.9492	-0.10986
78	-0.10376
78.0508	-0.11292
78.1016	-0.11292
78.1484	-0.11902
78.1992	-0.11597
78.25	-0.12207
78.3008	-0.12207
78.3516	-0.10681
78.3984	-0.10986
78.4492	-0.11292
78.5	-0.11292
78.5508	-0.10071
78.6016	-0.09766
78.6484	-0.09766
78.6992	-0.10071
78.75	-0.0946
78.8008	-0.0824
78.8516	-0.0946
78.8984	-0.09766
78.9492	-0.10986
79	-0.10071
79.0508	-0.10681
79.1016	-0.10681
79.1484	-0.10986
79.1992	-0.10376
79.25	-0.10071
79.3008	-0.09766
79.3516	-0.0946
79.3984	-0.0824
79.4492	-0.0885
79.5	-0.07935
79.5508	-0.08545
79.6016	-0.0824
79.6484	-0.0946
79.6992	-0.10071
79.75	-0.10376
79.8008	-0.10376
79.8516	-0.10681
79.8984	-0.10681
79.9492	-0.10376
80	-0.0946
80.0508	-0.0824
80.1016	-0.0824
80.1484	-0.06714
80.1992	-0.06714
80.25	-0.07019
80.3008	-0.07629
80.3516	-0.06409
80.3984	-0.07019
80.4492	-0.07324
80.5	-0.0824
80.5508	-0.07935
80.6016	-0.07935
80.6484	-0.07935
80.6992	-0.0885
80.75	-0.08545
80.8008	-0.07935
80.8516	-0.08545
80.8984	-0.0946
80.9492	-0.10071
81	-0.10071
81.0508	-0.10071
81.1016	-0.10986
81.1484	-0.11292
81.1992	-0.11902
81.25	-0.10376
81.3008	-0.11292
81.3516	-0.12512
81.3984	-0.13428
81.4492	-0.13733
81.5	-0.12817
81.5508	-0.13428
81.6016	-0.13428
81.6484	-0.13428
81.6992	-0.11902
81.75	-0.13123
81.8008	-0.13733
81.8516	-0.15259
81.8984	-0.14343
81.9492	-0.14038
82	-0.13733
82.0508	-0.14648
82.1016	-0.14954
82.1484	-0.14038
82.1992	-0.15259
82.25	-0.15564
82.3008	-0.16785
82.3516	-0.15869
82.3984	-0.15869
82.4492	-0.15564
82.5	-0.16785
82.5508	-0.16479
82.6016	-0.15869
82.6484	-0.16479
82.6992	-0.16479
82.75	-0.1709
82.8008	-0.16785
82.8516	-0.16479
82.8984	-0.17395
82.9492	-0.17395
83	-0.17395
83.0508	-0.16174
83.1016	-0.177
83.1484	-0.177
83.1992	-0.18311
83.25	-0.1709
83.3008	-0.1709
83.3516	-0.16785
83.3984	-0.1709
83.4492	-0.16479
83.5	-0.14954
83.5508	-0.15564
83.6016	-0.14954
83.6484	-0.14954
83.6992	-0.13123
83.75	-0.13428
83.8008	-0.13123
83.8516	-0.12817
83.8984	-0.11292
83.9492	-0.10681
84	-0.10681
84.0508	-0.11292
84.1016	-0.10071
84.1484	-0.0885
84.1992	-0.08545
84.25	-0.0885
84.3008	-0.08545
84.3516	-0.07935
84.3984	-0.06104
84.4492	-0.06714
84.5	-0.06409
84.5508	-0.0824
84.6016	-0.07019
84.6484	-0.07019
84.6992	-0.07019
84.75	-0.06409
84.8008	-0.04883
84.8516	-0.04272
84.8984	-0.04883
84.9492	-0.05798
85	-0.06409
85.0508	-0.05188
85.1016	-0.04272
85.1484	-0.04272
85.1992	-0.03357
85.25	-0.02747
85.3008	-0.02136
85.3516	-0.02747
85.3984	-0.02747
85.4492	-0.03662
85.5	-0.01526
85.5508	-0.00916
85.6016	-0.0061
85.6484	-0.01221
85.6992	-0.00305
85.75	0
85.8008	-0.01526
85.8516	-0.0061
85.8984	-0.00305
85.9492	0.0061
86	0.0061
86.0508	0.00305
86.1016	0.0061
86.1484	0.0061
86.1992	0.00916
86.25	0.00916
86.3008	0.00916
86.3516	0
86.3984	0.01221
86.4492	-0.00305
86.5	-0.00305
86.5508	-0.00916
86.6016	-0.00916
86.6484	-0.01221
86.6992	-0.01526
86.75	-0.01831
86.8008	-0.01526
86.8516	-0.0061
86.8984	-0.01831
86.9492	-0.02441
87	-0.03662
87.0508	-0.02441
87.1016	-0.03357
87.1484	-0.03967
87.1992	-0.04578
87.25	-0.03357
87.3008	-0.04272
87.3516	-0.04272
87.3984	-0.04272
87.4492	-0.03967
87.5	-0.03967
87.5508	-0.03357
87.6016	-0.03967
87.6484	-0.04578
87.6992	-0.04883
87.75	-0.05188
87.8008	-0.06104
87.8516	-0.05798
87.8984	-0.06104
87.9492	-0.05798
88	-0.06714
88.0508	-0.07935
88.1016	-0.0824
88.1484	-0.0885
88.1992	-0.07324
88.25	-0.0824
88.3008	-0.07629
88.3516	-0.07935
88.3984	-0.05798
88.4492	-0.05798
88.5	-0.05798
88.5508	-0.06409
88.6016	-0.06104
88.6484	-0.05493
88.6992	-0.05798
88.75	-0.05798
88.8008	-0.05493
88.8516	-0.04883
88.8984	-0.04883
88.9492	-0.06104
89	-0.06104
89.0508	-0.05798
89.1016	-0.05188
89.1484	-0.05188
89.1992	-0.05188
89.25	-0.05798
89.3008	-0.05493
89.3516	-0.05798
89.3984	-0.06409
89.4492	-0.06104
89.5	-0.05188
89.5508	-0.04272
89.6016	-0.04883
89.6484	-0.04578
89.6992	-0.04578
89.75	-0.03662
89.8008	-0.04272
89.8516	-0.04272
89.8984	-0.04578
89.9492	-0.04272
90	-0.03357
90.0508	-0.04578
90.1016	-0.05493
90.1484	-0.06714
90.1992	-0.05188
90.25	-0.05493
90.3008	-0.05188
90.3516	-0.05493
90.3984	-0.03967
90.4492	-0.03052
90.5	-0.02441
90.5508	-0.02747
90.6016	-0.03052
90.6484	-0.01526
90.6992	-0.02441
90.75	-0.02136
90.8008	-0.03052
90.8516	-0.01831
90.8984	-0.01831
90.9492	-0.01526
91	-0.02441
91.0508	-0.02136
91.1016	-0.0061
91.1484	-0.00305
91.1992	0
91.25	0
91.3008	0.00305
91.3516	0.00916
91.3984	0.01526
91.4492	0.01831
91.5	0.01831
91.5508	0.03052
91.6016	0.01831
91.6484	0.00916
91.6992	0
91.75	0.00916
91.8008	0.00916
91.8516	0.0061
91.8984	0
91.9492	0.0061
92	0.02441
92.0508	0.02441
92.1016	0.03357
92.1484	0.03357
92.1992	0.04272
92.25	0.03967
92.3008	0.04272
92.3516	0.03967
92.3984	0.04578
92.4492	0.05493
92.5	0.04883
92.5508	0.04272
92.6016	0.03967
92.6484	0.05493
92.6992	0.06104
92.75	0.06104
92.8008	0.05798
92.8516	0.05188
92.8984	0.06104
92.9492	0.05493
93	0.04883
93.0508	0.04272
93.1016	0.05188
93.1484	0.05188
93.1992	0.05188
93.25	0.04883
93.3008	0.03967
93.3516	0.04883
93.3984	0.03967
93.4492	0.03357
93.5	0.03357
93.5508	0.04578
93.6016	0.04272
93.6484	0.03357
93.6992	0.01221
93.75	0.0061
93.8008	0.00916
93.8516	0.0061
93.8984	-0.00305
93.9492	-0.00916
94	-0.0061
94.0508	-0.00916
94.1016	-0.01526
94.1484	-0.01831
94.1992	-0.02441
94.25	-0.00916
94.3008	-0.01221
94.3516	-0.00916
94.3984	-0.02136
94.4492	-0.01221
94.5	-0.03357
94.5508	-0.04578
94.6016	-0.06104
94.6484	-0.05493
94.6992	-0.04578
94.75	-0.05188
94.8008	-0.06104
94.8516	-0.07019
94.8984	-0.06714
94.9492	-0.0824
95	-0.0885
95.0508	-0.09766
95.1016	-0.10376
95.1484	-0.09766
95.1992	-0.10071
95.25	-0.10681
95.3008	-0.11292
95.3516	-0.11292
95.3984	-0.12512
95.4492	-0.13428
95.5	-0.14038
95.5508	-0.13428
95.6016	-0.12512
95.6484	-0.12817
95.6992	-0.12817
95.75	-0.13428
95.8008	-0.11292
95.8516	-0.12207
95.8984	-0.11902
95.9492	-0.11902
96	-0.12207
96.0508	-0.12512
96.1016	-0.12512
96.1484	-0.13733
96.1992	-0.14343
96.25	-0.14648
96.3008	-0.14343
96.3516	-0.14038
96.3984	-0.14038
96.4492	-0.14343
96.5	-0.13733
96.5508	-0.13428
96.6016	-0.13428
96.6484	-0.14038
96.6992	-0.11902
96.75	-0.11292
96.8008	-0.09766
96.8516	-0.10986
96.8984	-0.10376
96.9492	-0.10681
97	-0.10376
97.0508	-0.10376
97.1016	-0.0946
97.1484	-0.0824
97.1992	-0.07324
97.25	-0.07629
97.3008	-0.08545
97.3516	-0.07935
97.3984	-0.07935
97.4492	-0.08545
97.5	-0.0885
97.5508	-0.09155
97.6016	-0.07935
97.6484	-0.08545
97.6992	-0.09155
97.75	-0.09155
97.8008	-0.09155
97.8516	-0.0885
97.8984	-0.09155
97.9492	-0.0885
98	-0.0885
98.0508	-0.07324
98.1016	-0.07629
98.1484	-0.07629
98.1992	-0.07935
98.25	-0.05798
98.3008	-0.06409
98.3516	-0.05493
98.3984	-0.06104
98.4492	-0.05493
98.5	-0.05188
98.5508	-0.04578
98.6016	-0.04883
98.6484	-0.05798
98.6992	-0.04578
98.75	-0.05188
98.8008	-0.05798
98.8516	-0.06409
98.8984	-0.07019
98.9492	-0.06409
99	-0.06714
99.0508	-0.07629
99.1016	-0.06714
99.1484	-0.06104
99.1992	-0.06409
99.25	-0.07324
99.3008	-0.07324
99.3516	-0.07019
99.3984	-0.05798
99.4492	-0.06409
99.5	-0.06714
99.5508	-0.06714
99.6016	-0.04578
99.6484	-0.05493
99.6992	-0.05798
99.75	-0.06714
99.8008	-0.07629
[truncated: 98,004 more rows]
