# Supplementary material for: The cation channel mechanisms of subthreshold inward depolarizing currents in the mice VTA dopaminergic neurons and their roles in the chronic-stress-induced depression-like behavior
Source: eLife. 2024 Dec 6;12:RP88319. doi: 10.7554/eLife.88319 (PMC11623934; doi:10.7554/eLife.88319)
Supplement: Figure 5—source data 5. [file elife-88319-fig5-data5.xlsx]

## Sheet: Figure 5 F i
0.27	0.49383
0.54	0.30864
0.81	0.4321
1.08	0.24691
1.35	0.30864
1.62	0.24691
1.89	0.18519
2.16	0.18519
2.43	0.18519
2.7	0.24691
2.97	0.18519
3.24	0.12346
3.51	0.4321
3.78	0.55556
4.05	0.06173
4.32	0.4321
4.59	0.30864
4.86	0.37037
5.13	0.37037
5.4	0.24691
5.67	0.30864
5.94	0.37037
6.21	0.24691
6.48	0.18519
6.75	0.4321
7.02	0.55556
7.29	0.30864
7.56	0.30864
7.83	0.18519
8.1	0.4321
8.37	0.30864
8.64	0.37037
8.91	0.37037
9.18	0.55556
9.45	0.4321
9.72	0.4321
9.99	0.49383
10.26	0.4321
10.53	0.61728
10.8	0.49383
11.07	0.92593
11.34	0.49383
11.61	0.30864
11.88	0.30864
12.15	0.30864
12.42	0.4321
12.69	0.24691
12.96	0.30864
13.23	0.18519
13.5	0.30864
13.77	0.24691
14.04	0.4321
14.31	0.30864
14.58	0.37037
14.85	0.61728
15.12	0.30864
15.39	0.55556
15.66	0.61728
15.93	0.4321
16.2	0.55556
16.47	0.55556
16.74	0.49383
17.01	0.4321
17.28	0.30864
17.55	0.49383
17.82	0.30864
18.09	0.49383
18.36	0.24691
18.63	0.55556
18.9	0.37037
19.17	0.49383
19.44	0.37037
19.71	0.24691
19.98	0.61728
20.25	0.4321
20.52	0.24691
20.79	0.49383
21.06	0.37037
21.33	0.49383
21.6	0.37037
21.87	0.24691
22.14	0.24691
22.41	0.30864
22.68	0.37037
22.95	0.4321
23.22	0.18519
23.49	0.37037
23.76	0.49383
24.03	0.24691
24.3	0.12346
24.57	0.12346
24.84	0.4321
25.11	0.49383
25.38	0.37037
25.65	0.30864
25.92	0.18519
26.19	0.61728
26.46	0.67901
26.73	0.80247
27	0.4321

## Sheet: Figure 5 F ii
ACSF	2-APB	ACSF
0.55	0.56	0.95
0.5	0.07	0.21
0.36	0.25	0.24
0.65	0.02	0.53
0.27	0.4	0.55
0.31	0.29	0.64
1.44	1.22	1.74
