# Supplementary material for: The cation channel mechanisms of subthreshold inward depolarizing currents in the mice VTA dopaminergic neurons and their roles in the chronic-stress-induced depression-like behavior
Source: eLife. 2024 Dec 6;12:RP88319. doi: 10.7554/eLife.88319 (PMC11623934; doi:10.7554/eLife.88319)
Supplement: Figure 5—source data 6. [file elife-88319-fig5-data6.xlsx]

## Sheet: Figure 5 G i up
Example traces
CON
Time(ms)	RMP(mV)
0	-51.5137
0.1001	-51.5747
0.2002	-51.4832
0.30029	-51.4832
0.40039	-51.5137
0.5	-51.5747
0.6001	-51.4526
0.7002	-51.5442
0.80029	-51.6052
0.90039	-51.4832
1	-51.6968
1.1001	-51.5137
1.2002	-51.5747
1.30029	-51.5747
1.40039	-51.5747
1.5	-51.5747
1.6001	-51.6357
1.7002	-51.5137
1.80029	-51.5442
1.90039	-51.6052
2	-51.6357
2.1001	-51.6968
2.2002	-51.4832
2.30029	-51.5137
2.40039	-51.5137
2.5	-51.5137
2.6001	-51.4832
2.7002	-51.4221
2.80029	-51.6663
2.90039	-51.5137
3	-51.6357
3.1001	-51.5747
3.2002	-51.6052
3.30029	-51.5747
3.40039	-51.5137
3.5	-51.5442
3.6001	-51.4832
3.7002	-51.5747
3.80029	-51.6663
3.90039	-51.5137
4	-51.4526
4.1001	-51.5747
4.2002	-51.4526
4.30029	-51.6357
4.40039	-51.4832
4.5	-51.4221
4.6001	-51.5747
4.7002	-51.6052
4.80029	-51.6052
4.90039	-51.4221
5	-51.6357
5.1001	-51.4832
5.2002	-51.5442
5.30029	-51.6052
5.40039	-51.4526
5.5	-51.6052
5.6001	-51.5747
5.7002	-51.5747
5.80029	-51.5747
5.90039	-51.6357
6	-51.5442
6.1001	-51.4832
6.2002	-51.5442
6.30029	-51.4526
6.40039	-51.5747
6.5	-51.6052
6.6001	-51.5442
6.7002	-51.5747
6.80029	-51.6357
6.90039	-51.4832
7	-51.5747
7.1001	-51.4526
7.2002	-51.6663
7.30029	-51.6052
7.40039	-51.5137
7.5	-51.6968
7.6001	-51.5137
7.7002	-51.6968
7.80029	-51.5747
7.90039	-51.6052
8	-51.6052
8.1001	-51.5442
8.2002	-51.6357
8.30029	-51.6052
8.40039	-51.4832
8.5	-51.6357
8.6001	-51.6357
8.7002	-51.6052
8.80029	-51.6663
8.90039	-51.5137
9	-51.6663
9.1001	-51.7273
9.2002	-51.5442
9.30029	-51.6968
9.40039	-51.5747
9.5	-51.4832
9.6001	-51.6968
9.7002	-51.5442
9.80029	-51.6052
9.90039	-51.6357
10	-51.5137
10.1001	-51.6052
10.2002	-51.5442
10.3003	-51.4832
10.4004	-51.5442
10.5	-51.5747
10.6001	-51.4832
10.7002	-51.5137
10.8003	-51.5442
10.9004	-51.4526
11	-51.5137
11.1001	-51.5442
11.2002	-51.3916
11.3003	-51.6357
11.4004	-51.4832
11.5	-51.4832
11.6001	-51.5747
11.7002	-51.4221
11.8003	-51.4221
11.9004	-51.5442
12	-51.4832
12.1001	-51.4526
12.2002	-51.5442
12.3003	-51.4832
12.4004	-51.4832
12.5	-51.6663
12.6001	-51.4832
12.7002	-51.5137
12.8003	-51.6357
12.9004	-51.3611
13	-51.6052
13.1001	-51.4832
13.2002	-51.4526
13.3003	-51.5747
13.4004	-51.5137
13.5	-51.5747
13.6001	-51.4526
13.7002	-51.5747
13.8003	-51.4832
13.9004	-51.4221
14	-51.6968
14.1001	-51.4221
14.2002	-51.6052
14.3003	-51.4221
14.4004	-51.5442
14.5	-51.5442
14.6001	-51.4832
14.7002	-51.5442
14.8003	-51.4526
14.9004	-51.4832
15	-51.6052
15.1001	-51.6052
15.2002	-51.4832
15.3003	-51.5747
15.4004	-51.5137
15.5	-51.5137
15.6001	-51.4832
15.7002	-51.4832
15.8003	-51.4832
15.9004	-51.5442
16	-51.5747
16.1001	-51.4832
16.2002	-51.6052
16.3003	-51.4526
16.4004	-51.5137
16.5	-51.5442
16.6001	-51.4526
16.7002	-51.5442
16.8003	-51.4221
16.9004	-51.4526
17	-51.5747
17.1001	-51.4221
17.2002	-51.4526
17.3003	-51.4832
17.4004	-51.3916
17.5	-51.4526
17.6001	-51.4526
17.7002	-51.4221
17.8003	-51.4526
17.9004	-51.3
18	-51.5442
18.1001	-51.4526
18.2002	-51.4526
18.3003	-51.4221
18.4004	-51.3611
18.5	-51.3611
18.6001	-51.4221
18.7002	-51.3916
18.8003	-51.5137
18.9004	-51.3916
19	-51.3
19.1001	-51.3916
19.2002	-51.3611
19.3003	-51.4221
19.4004	-51.3916
19.5	-51.3916
19.6001	-51.5137
19.7002	-51.3916
19.8003	-51.5137
19.9004	-51.3916
20	-51.5137
20.1001	-51.3611
20.2002	-51.5137
20.3003	-51.4221
20.4004	-51.3916
20.5	-51.5747
20.6001	-51.3916
20.7002	-51.6052
20.8003	-51.5137
20.9004	-51.5137
21	-51.6052
21.1001	-51.4526
21.2002	-51.5747
21.3003	-51.5442
21.4004	-51.5442
21.5	-51.5442
21.6001	-51.5442
21.7002	-51.5442
21.8003	-51.6968
21.9004	-51.5137
22	-51.6663
22.1001	-51.3916
22.2002	-51.5747
22.3003	-51.5747
22.4004	-51.5442
22.5	-51.6357
22.6001	-51.5442
22.7002	-51.6052
22.8003	-51.6357
22.9004	-51.5442
23	-51.4221
23.1001	-51.5442
23.2002	-51.5137
23.3003	-51.4221
23.4004	-51.5442
23.5	-51.4832
23.6001	-51.4832
23.7002	-51.5137
23.8003	-51.5747
23.9004	-51.3916
24	-51.5137
24.1001	-51.5137
24.2002	-51.3
24.3003	-51.6357
24.4004	-51.4832
24.5	-51.4526
24.6001	-51.5442
24.7002	-51.4832
24.8003	-51.4526
24.9004	-51.4526
25	-51.4526
25.1001	-51.4526
25.2002	-51.4832
25.3003	-51.5137
25.4004	-51.5442
25.5	-51.4526
25.6001	-51.5747
25.7002	-51.4526
25.8003	-51.4832
25.9004	-51.4526
26	-51.5442
26.1001	-51.4832
26.2002	-51.4832
26.3003	-51.5442
26.4004	-51.4832
26.5	-51.6357
26.6001	-51.5442
26.7002	-51.4526
26.8003	-51.5442
26.9004	-51.5442
27	-51.6052
27.1001	-51.4832
27.2002	-51.5747
27.3003	-51.4832
27.4004	-51.5137
27.5	-51.6663
27.6001	-51.4832
27.7002	-51.5442
27.8003	-51.6663
27.9004	-51.4526
28	-51.6968
28.1001	-51.4832
28.2002	-51.5137
28.3003	-51.6357
28.4004	-51.5442
28.5	-51.6663
28.6001	-51.5442
28.7002	-51.5442
28.8003	-51.5442
28.9004	-51.5442
29	-51.6968
29.1001	-51.6052
29.2002	-51.6357
29.3003	-51.5442
29.4004	-51.5442
29.5	-51.6052
29.6001	-51.5747
29.7002	-51.4832
29.8003	-51.5442
29.9004	-51.6052
30	-51.5747
30.1001	-51.5747
30.2002	-51.5442
30.3003	-51.5137
30.4004	-51.5747
30.5	-51.5137
30.6001	-51.4526
30.7002	-51.4221
30.8003	-51.5137
30.9004	-51.4526
31	-51.5442
31.1001	-51.5442
31.2002	-51.4221
31.3003	-51.4526
31.4004	-51.4526
31.5	-51.3611
31.6001	-51.4832
31.7002	-51.3916
31.8003	-51.3916
31.9004	-51.5747
32	-51.3306
32.1001	-51.4221
32.2002	-51.4526
32.3003	-51.4832
32.4004	-51.3306
32.5	-51.5137
32.6001	-51.5137
32.7002	-51.4221
32.8003	-51.6052
32.9004	-51.3916
33	-51.4526
33.1001	-51.4832
33.2002	-51.5137
33.3003	-51.4526
33.4004	-51.3916
33.5	-51.3306
33.6001	-51.4221
33.7002	-51.5442
33.8003	-51.5442
33.9004	-51.4221
34	-51.5137
34.1001	-51.5442
34.2002	-51.4832
34.3003	-51.5137
34.4004	-51.3916
34.5	-51.4832
34.6001	-51.4221
34.7002	-51.5442
34.8003	-51.5442
34.9004	-51.3306
35	-51.6663
35.1001	-51.3916
35.2002	-51.4832
35.3003	-51.4221
35.4004	-51.4832
35.5	-51.5137
35.6001	-51.3916
35.7002	-51.6052
35.8003	-51.3916
35.9004	-51.5137
36	-51.5442
36.1001	-51.3
36.2002	-51.5442
36.3003	-51.4526
36.4004	-51.4221
36.5	-51.5442
36.6001	-51.3916
36.7002	-51.3916
36.8003	-51.5442
36.9004	-51.239
37	-51.5442
37.1001	-51.3306
37.2002	-51.4526
37.3003	-51.4526
37.4004	-51.3611
37.5	-51.4832
37.6001	-51.4832
37.7002	-51.4221
37.8003	-51.4832
37.9004	-51.3611
38	-51.3916
38.1001	-51.3916
38.2002	-51.3916
38.3003	-51.3306
38.4004	-51.3306
38.5	-51.3306
38.6001	-51.4526
38.7002	-51.3611
38.8003	-51.5442
38.9004	-51.239
39	-51.239
39.1001	-51.2695
39.2002	-51.239
39.3003	-51.4526
39.4004	-51.3916
39.5	-51.3916
39.6001	-51.4221
39.7002	-51.3
39.8003	-51.3611
39.9004	-51.4221
40	-51.3916
40.1001	-51.3916
40.2002	-51.4832
40.3003	-51.3611
40.4004	-51.4526
40.5	-51.5442
40.6001	-51.4526
40.7002	-51.4832
40.8003	-51.5137
40.9004	-51.3306
41	-51.5137
41.1001	-51.5442
41.2002	-51.4221
41.3003	-51.5747
41.4004	-51.4832
41.5	-51.4832
41.6001	-51.4526
41.7002	-51.4832
41.8003	-51.4221
41.9004	-51.5137
42	-51.6357
42.1001	-51.3306
42.2002	-51.7273
42.3003	-51.5137
42.4004	-51.3306
42.5	-51.5442
42.6001	-51.4221
42.7002	-51.4221
42.8003	-51.5137
42.9004	-51.4526
43	-51.5137
43.1001	-51.3611
43.2002	-51.4526
43.3003	-51.3916
43.4004	-51.4221
43.5	-51.6357
43.6001	-51.3916
43.7002	-51.4221
43.8003	-51.4221
43.9004	-51.3306
44	-51.5137
44.1001	-51.4526
44.2002	-51.4832
44.3003	-51.3611
44.4004	-51.4526
44.5	-51.4832
44.6001	-51.3916
44.7002	-51.3
44.8003	-51.4832
44.9004	-51.3611
45	-51.5442
45.1001	-51.5137
45.2002	-51.3
45.3003	-51.4221
45.4004	-51.4526
45.5	-51.4526
45.6001	-51.3611
45.7002	-51.4221
45.8003	-51.4526
45.9004	-51.3306
46	-51.4832
46.1001	-51.4221
46.2002	-51.4526
46.3003	-51.4832
46.4004	-51.3916
46.5	-51.4526
46.6001	-51.4221
46.7002	-51.3916
46.8003	-51.4832
46.9004	-51.5137
47	-51.4221
47.1001	-51.5137
47.2002	-51.4221
47.3003	-51.5747
47.4004	-51.4526
47.5	-51.3611
47.6001	-51.5137
47.7002	-51.4832
47.8003	-51.6357
47.9004	-51.4221
48	-51.5137
48.1001	-51.4526
48.2002	-51.5137
48.3003	-51.6357
48.4004	-51.5747
48.5	-51.4221
48.6001	-51.6357
48.7002	-51.5747
48.8003	-51.5747
48.9004	-51.6663
49	-51.5747
49.1001	-51.5747
49.2002	-51.6357
49.3003	-51.4526
49.4004	-51.4526
49.5	-51.5747
49.6001	-51.4526
49.7002	-51.6052
49.8003	-51.5442
49.9004	-51.3611
50	-51.6052
50.1001	-51.3306
50.2002	-51.4832
50.3003	-51.5442
50.4004	-51.3306
50.5	-51.4832
50.6001	-51.3611
50.7002	-51.3611
50.8003	-51.4221
50.9004	-51.4526
51	-51.3611
51.1001	-51.4221
51.2002	-51.4221
51.3003	-51.3306
51.4004	-51.4221
51.5	-51.3611
51.6001	-51.3611
51.7002	-51.4221
51.8003	-51.4526
51.9004	-51.3
52	-51.4221
52.1001	-51.3306
52.2002	-51.3306
52.3003	-51.4832
52.4004	-51.2695
52.5	-51.4221
52.6001	-51.4526
52.7002	-51.2695
52.8003	-51.3611
52.9004	-51.4526
53	-51.3916
53.1001	-51.4221
53.2002	-51.3916
53.3003	-51.3
53.4004	-51.3611
53.5	-51.3611
53.6001	-51.4526
53.7002	-51.3306
53.8003	-51.4526
53.9004	-51.3611
54	-51.3916
54.1001	-51.3611
54.2002	-51.2695
54.3003	-51.4221
54.4004	-51.3611
54.5	-51.5137
54.6001	-51.3611
54.7002	-51.3611
54.8003	-51.4526
54.9004	-51.3916
55	-51.3916
55.1001	-51.4221
55.2002	-51.3916
55.3003	-51.3
55.4004	-51.4526
55.5	-51.4526
55.6001	-51.3306
55.7002	-51.3611
55.8003	-51.4221
55.9004	-51.2695
56	-51.4526
56.1001	-51.3611
56.2002	-51.3
56.3003	-51.4526
56.4004	-51.178
56.5	-51.4526
56.6001	-51.2695
56.7002	-51.3306
56.8003	-51.3611
56.9004	-51.2085
57	-51.4526
57.1001	-51.239
57.2002	-51.3611
57.3003	-51.3306
57.4004	-51.3
57.5	-51.3
57.6001	-51.3306
57.7002	-51.3916
57.8003	-51.2695
57.9004	-51.2085
58	-51.3916
58.1001	-51.2695
58.2002	-51.3306
58.3003	-51.3306
58.4004	-51.3306
58.5	-51.3306
58.6001	-51.2695
58.7002	-51.3
58.8003	-51.178
58.9004	-51.239
59	-51.3
59.1001	-51.178
59.2002	-51.3
59.3003	-51.2695
59.4004	-51.3306
59.5	-51.3611
59.6001	-51.239
59.7002	-51.239
59.8003	-51.3
59.9004	-51.239
60	-51.3611
60.1001	-51.3611
60.2002	-51.2695
60.3003	-51.3611
60.4004	-51.3
60.5	-51.3
60.6001	-51.3306
60.7002	-51.3
60.8003	-51.3306
60.9004	-51.2695
61	-51.3306
61.1001	-51.3611
61.2002	-51.4221
61.3003	-51.3306
61.4004	-51.3916
61.5	-51.3611
61.6001	-51.3611
61.7002	-51.3
61.8003	-51.3916
61.9004	-51.3611
62	-51.3611
62.1001	-51.4526
62.2002	-51.239
62.3003	-51.3916
62.4004	-51.3916
62.5	-51.3916
62.6001	-51.3306
62.7002	-51.4526
62.8003	-51.4526
62.9004	-51.3
63	-51.5137
63.1001	-51.239
63.2002	-51.3916
63.3003	-51.3916
63.4004	-51.2085
63.5	-51.3306
63.6001	-51.3916
63.7002	-51.3
63.8003	-51.3
63.9004	-51.4221
64	-51.3
64.1001	-51.3306
64.2002	-51.4526
64.3003	-51.3916
64.4004	-51.178
64.5	-51.3306
64.6001	-51.3306
64.7002	-51.3306
64.8003	-51.3916
64.9004	-51.239
65	-51.3611
65.1001	-51.2695
65.2002	-51.3916
65.3003	-51.3306
65.4004	-51.3
65.5	-51.3306
65.6001	-51.239
65.7002	-51.3916
65.8003	-51.3306
65.9004	-51.3
66	-51.3306
66.1001	-51.3306
66.2002	-51.3306
66.3003	-51.3916
66.4004	-51.239
66.5	-51.2695
66.6001	-51.4832
66.7002	-51.3
66.8003	-51.4221
66.9004	-51.2695
67	-51.3
67.1001	-51.4221
67.2002	-51.2695
67.3003	-51.3916
67.4004	-51.3
67.5	-51.4221
67.6001	-51.3916
67.7002	-51.2695
67.8003	-51.3611
67.9004	-51.3611
68	-51.3611
68.1001	-51.3916
68.2002	-51.2695
68.3003	-51.3306
68.4004	-51.3611
68.5	-51.3306
68.6001	-51.5137
68.7002	-51.2695
68.8003	-51.4526
68.9004	-51.3611
69	-51.4221
69.1001	-51.4221
69.2002	-51.3
69.3003	-51.3611
69.4004	-51.3916
69.5	-51.3916
69.6001	-51.4221
69.7002	-51.3916
69.8003	-51.3306
69.9004	-51.3306
70	-51.4221
70.1001	-51.239
70.2002	-51.3
70.3003	-51.3306
70.4004	-51.2695
70.5	-51.3611
70.6001	-51.3611
70.7002	-51.2085
70.8003	-51.3
70.9004	-51.239
71	-51.3
71.1001	-51.3
71.2002	-51.3
71.3003	-51.2695
71.4004	-51.178
71.5	-51.4221
71.6001	-51.178
71.7002	-51.2695
71.8003	-51.2695
71.9004	-51.1475
72	-51.2695
72.1001	-51.1475
72.2002	-51.3916
72.3003	-51.239
72.4004	-51.2695
72.5	-51.3916
72.6001	-51.2085
72.7002	-51.178
72.8003	-51.3306
72.9004	-51.178
73	-51.239
73.1001	-51.2695
73.2002	-51.239
73.3003	-51.239
73.4004	-51.178
73.5	-51.3611
73.6001	-51.239
73.7002	-51.2085
73.8003	-51.239
73.9004	-51.2085
74	-51.2695
74.1001	-51.178
74.2002	-51.3
74.3003	-51.239
74.4004	-51.2085
74.5	-51.3306
74.6001	-51.3306
74.7002	-51.1169
74.8003	-51.2695
74.9004	-51.2695
75	-51.239
75.1001	-51.2085
75.2002	-51.239
75.3003	-51.3
75.4004	-51.1475
75.5	-51.3
75.6001	-51.239
75.7002	-51.1475
75.8003	-51.3
75.9004	-51.178
76	-51.1475
76.1001	-51.2085
76.2002	-51.3306
76.3003	-51.2085
76.4004	-51.178
76.5	-51.239
76.6001	-51.3
76.7002	-51.1169
76.8003	-51.2085
76.9004	-51.178
77	-51.178
77.1001	-51.2085
77.2002	-51.2695
77.3003	-51.178
77.4004	-51.239
77.5	-51.178
77.6001	-51.0559
77.7002	-51.3306
77.8003	-51.1475
77.9004	-51.1475
78	-51.3
78.1001	-51.0254
78.2002	-51.2695
78.3003	-51.0864
78.4004	-51.0864
78.5	-51.2085
78.6001	-51.0559
78.7002	-51.1475
78.8003	-51.1169
78.9004	-51.0254
79	-51.2085
79.1001	-50.9644
79.2002	-51.178
79.3003	-51.178
79.4004	-50.9644
79.5	-51.2695
79.6001	-51.0559
79.7002	-51.1169
79.8003	-51.239
79.9004	-51.0559
80	-51.3
80.1001	-51.1169
80.2002	-51.178
80.3003	-51.2695
80.4004	-51.1475
80.5	-51.1169
80.6001	-51.2085
80.7002	-51.2695
80.8003	-51.178
80.9004	-51.3
81	-51.2085
81.1001	-51.239
81.2002	-51.239
81.3003	-51.239
81.4004	-51.178
81.5	-51.2085
81.6001	-51.239
81.7002	-51.239
81.8003	-51.3611
81.9004	-51.1169
82	-51.3
82.1001	-51.3306
82.2002	-50.9949
82.3003	-51.1475
82.4004	-51.239
82.5	-51.1475
82.6001	-51.178
82.7002	-51.2085
82.8003	-51.1169
82.9004	-51.239
83	-51.3
83.1001	-51.178
83.2002	-51.178
83.3003	-51.2695
83.4004	-51.1169
83.5	-51.178
83.6001	-51.3
83.7002	-51.0559
83.8003	-51.2085
83.9004	-51.2085
84	-51.2085
84.1001	-51.178
84.2002	-51.1475
84.3003	-51.1475
84.4004	-51.178
84.5	-51.3
84.6001	-51.0559
84.7002	-51.178
84.8003	-51.178
84.9004	-51.0559
85	-51.2695
85.1001	-51.2085
85.2002	-51.0864
85.3003	-51.2085
85.4004	-51.178
85.5	-51.1475
85.6001	-51.3
85.7002	-51.1169
85.8003	-51.178
85.9004	-51.178
86	-51.1169
86.1001	-51.239
86.2002	-51.1169
86.3003	-51.1475
86.4004	-51.178
86.5	-51.3306
86.6001	-51.1475
86.7002	-51.239
86.8003	-51.239
86.9004	-51.0559
87	-51.3306
87.1001	-51.1169
87.2002	-51.2695
87.3003	-51.2085
87.4004	-51.2695
87.5	-51.239
87.6001	-51.2085
87.7002	-51.178
87.8003	-51.2695
87.9004	-51.2085
88	-51.2695
88.1001	-51.2085
88.2002	-51.239
88.3003	-51.239
88.4004	-51.3306
88.5	-51.3
88.6001	-51.178
88.7002	-51.3
88.8003	-51.1475
88.9004	-51.2695
89	-51.3611
89.1001	-51.2695
89.2002	-51.2695
89.3003	-51.178
89.4004	-51.2085
89.5	-51.2085
89.6001	-51.3306
89.7002	-51.2085
89.8003	-51.1475
89.9004	-51.239
90	-51.1169
90.1001	-51.2695
90.2002	-51.2085
90.3003	-51.178
90.4004	-51.2085
90.5	-51.1169
90.6001	-51.1475
90.7002	-51.178
90.8003	-51.0864
90.9004	-51.0864
91	-51.1475
91.1001	-51.0864
91.2002	-51.2085
91.3003	-51.0864
91.4004	-51.0864
91.5	-51.1475
91.6001	-51.1169
91.7002	-51.0864
91.8003	-51.1475
91.9004	-51.0559
92	-51.0864
92.1001	-51.0254
92.2002	-51.0864
92.3003	-51.3
92.4004	-51.0864
92.5	-51.2085
92.6001	-50.9949
92.7002	-51.1169
92.8003	-51.178
92.9004	-51.0254
93	-51.178
93.1001	-51.0864
93.2002	-51.178
93.3003	-51.0864
93.4004	-51.1475
93.5	-51.0864
93.6001	-51.0864
93.7002	-51.2695
93.8003	-51.0864
93.9004	-51.0864
94	-51.178
94.1001	-51.0559
94.2002	-51.239
94.3003	-51.178
94.4004	-51.0254
94.5	-51.2085
94.6001	-51.1169
94.7002	-51.1475
94.8003	-51.2695
94.9004	-51.0254
95	-51.178
95.1001	-51.1475
95.2002	-51.1169
95.3003	-51.178
95.4004	-51.1169
95.5	-50.9949
95.6001	-51.1169
95.7002	-51.1169
95.8003	-51.0254
95.9004	-51.178
96	-51.1169
96.1001	-51.178
96.2002	-51.0559
96.3003	-51.0254
96.4004	-51.0254
96.5	-50.9644
96.6001	-51.178
96.7002	-51.0864
96.8003	-51.1169
96.9004	-51.0559
97	-51.0864
97.1001	-51.0864
97.2002	-50.9644
97.3003	-51.0864
97.4004	-51.0254
97.5	-50.9949
97.6001	-51.0559
97.7002	-51.0559
97.8003	-51.1169
97.9004	-50.9949
98	-51.0864
98.1001	-51.0559
98.2002	-50.9338
98.3003	-51.1475
98.4004	-50.9949
98.5	-51.0864
98.6001	-51.0864
98.7002	-50.9033
98.8003	-51.1169
98.9004	-50.8423
99	-51.0559
99.1001	-50.9033
99.2002	-50.9644
99.3003	-51.0254
99.4004	-50.9338
99.5	-51.178
99.6001	-50.9338
99.7002	-50.9949
99.8003	-51.0559
99.9004	-50.9033
100	-51.178
100.1	-50.9949
100.2	-51.0864
100.3	-51.0864
100.4	-50.9644
100.5	-51.2085
100.6	-51.1475
100.7	-51.0864
100.8	-51.2085
100.9	-51.0864
101	-51.2085
101.1	-51.1475
101.2	-51.0559
101.3	-51.178
101.4	-51.0559
101.5	-51.3
101.6	-51.1169
101.7	-51.1475
101.8	-51.1169
101.9	-51.1169
102	-51.3
102.1	-51.178
102.2	-51.178
102.3	-50.9644
102.4	-51.0559
102.5	-51.1169
102.6	-51.239
102.7	-51.0254
102.8	-51.0864
102.9	-51.1169
103	-51.1475
103.1	-51.0864
103.2	-51.0864
103.3	-51.178
103.4	-51.0559
103.5	-51.178
103.6	-51.0254
103.7	-51.0559
103.8	-51.1169
103.9	-50.9949
104	-51.1475
104.1	-51.0559
104.2	-51.0559
104.3	-51.1169
104.4	-51.1475
104.5	-51.0254
104.6	-51.1475
104.7	-51.0254
104.8	-51.0254
104.9	-51.0864
105	-51.0254
105.1	-51.178
105.2	-51.0559
105.3	-51.1475
105.4	-51.0864
105.5	-51.1169
105.6	-51.0559
105.7	-51.1475
105.8	-51.1475
105.9	-51.0254
106	-51.1169
106.1	-51.0254
106.2	-51.178
106.3	-51.1475
106.4	-51.1475
106.5	-51.2085
106.6	-50.9949
106.7	-51.178
106.8	-51.1169
106.9	-51.1169
107	-51.178
107.1	-51.1475
107.2	-51.178
107.3	-51.0864
107.4	-51.2085
107.5	-51.1169
107.6	-51.0254
107.7	-51.178
107.8	-51.239
107.9	-51.178
108	-51.178
108.1	-51.1169
108.2	-51.2085
108.3	-51.1475
108.4	-51.178
108.5	-51.1169
108.6	-51.1169
108.7	-51.1475
108.8	-51.239
108.9	-51.239
109	-51.178
109.1	-51.239
109.2	-51.178
109.3	-51.178
109.4	-51.1475
109.5	-51.0864
109.6	-51.2695
109.7	-51.1169
109.8	-51.2085
109.9	-51.2085
110	-51.0254
110.1	-51.178
110.2	-51.1169
110.3	-51.1169
110.4	-51.2085
110.5	-50.9644
110.6	-51.178
110.7	-51.0864
110.8	-51.0254
110.9	-51.1475
111	-50.9644
111.1	-51.178
111.2	-51.1169
111.3	-51.0864
111.4	-51.0254
111.5	-50.9644
111.6	-51.0864
111.7	-51.0254
111.8	-51.1169
111.9	-51.1169
112	-51.0864
112.1	-51.0254
112.2	-51.0559
112.3	-51.0254
112.4	-51.0864
112.5	-51.1475
112.6	-51.0559
112.7	-51.1475
112.8	-50.9949
112.9	-51.0254
113	-51.2085
113.1	-51.0559
113.2	-51.1475
113.3	-51.1169
113.4	-50.9338
113.5	-51.178
113.6	-51.178
113.7	-50.9644
113.8	-51.239
113.9	-51.1169
114	-51.1475
114.1	-51.1169
114.2	-51.1169
114.3	-51.0254
114.4	-51.1169
114.5	-51.1475
114.6	-51.0254
114.7	-51.239
114.8	-51.0254
114.9	-51.0254
115	-51.239
115.1	-50.9644
115.2	-51.1475
115.3	-51.0864
115.4	-51.0559
115.5	-51.1475
115.6	-51.178
115.7	-51.0254
115.8	-51.2085
115.9	-50.9949
116	-51.178
116.1	-51.1169
116.2	-50.9644
116.3	-51.1475
116.4	-51.0254
116.5	-51.2085
116.6	-51.0254
116.7	-51.0864
116.8	-51.1169
116.9	-50.9949
117	-51.1169
117.1	-51.0254
117.2	-51.0864
117.3	-51.1169
117.4	-51.0559
117.5	-51.178
117.6	-51.0559
117.7	-51.0864
117.8	-50.9949
117.9	-51.0254
118	-51.0254
118.1	-51.0254
118.2	-50.9644
118.3	-50.9949
118.4	-51.0559
118.5	-51.0864
118.6	-50.9949
118.7	-51.0559
118.8	-50.9338
118.9	-50.9033
119	-50.9033
119.1	-50.9338
119.2	-51.0254
119.3	-50.9644
119.4	-51.1169
119.5	-50.9949
119.6	-51.0254
119.7	-50.9949
119.8	-51.0254
119.9	-51.0864
120	-51.0254
120.1	-51.1475
120.2	-51.0864
120.3	-51.0864
120.4	-51.1475
120.5	-51.0559
120.6	-51.1169
120.7	-51.2085
120.8	-51.1169
120.9	-51.0864
121	-51.178
121.1	-51.0864
121.2	-51.2695
121.3	-51.1169
121.4	-51.178
121.5	-51.2085
121.6	-51.0559
121.7	-51.1475
121.8	-51.178
121.9	-51.2085
122	-51.239
122.1	-51.0254
122.2	-51.178
122.3	-51.2085
122.4	-51.0254
122.5	-51.3306
122.6	-51.0864
122.7	-51.1475
122.8	-51.239
122.9	-51.0254
123	-51.2085
123.1	-51.0864
123.2	-51.1475
123.3	-51.2085
123.4	-51.1475
123.5	-51.0864
123.6	-51.1475
123.7	-51.2085
123.8	-51.1169
123.9	-51.1475
124	-51.0864
124.1	-51.1169
124.2	-51.178
124.3	-51.1475
124.4	-51.0254
124.5	-51.1475
124.6	-51.0864
124.7	-51.0559
124.8	-51.2085
124.9	-51.0254
125	-51.1169
125.1	-51.2085
125.2	-51.0559
125.3	-51.1475
125.4	-51.178
125.5	-50.9644
125.6	-51.0864
125.7	-51.1475
125.8	-51.1169
125.9	-51.1475
126	-51.0559
126.1	-51.2085
126.2	-51.1169
126.3	-51.178
126.4	-51.0864
126.5	-51.1169
126.6	-51.2085
126.7	-51.0559
126.8	-51.2695
126.9	-51.1169
127	-51.239
127.1	-51.2695
127.2	-51.0559
127.3	-51.1475
127.4	-51.2695
127.5	-51.1475
127.6	-51.2085
127.7	-51.239
127.8	-51.2695
127.9	-51.1475
128	-51.3
128.1	-51.2085
128.2	-51.178
128.3	-51.3
128.4	-51.239
128.5	-51.3306
128.6	-51.3
128.7	-51.3
128.8	-51.2085
128.9	-51.239
129	-51.4526
129.1	-51.2085
129.2	-51.2695
129.3	-51.178
129.4	-51.2085
129.5	-51.3611
129.6	-51.2085
129.7	-51.3916
129.8	-51.1475
129.9	-51.2085
130	-51.3306
130.1	-51.0864
130.2	-51.2695
130.3	-51.1475
130.4	-51.178
130.5	-51.239
130.6	-51.1475
130.7	-51.178
130.8	-51.178
130.9	-51.0864
131	-51.239
131.1	-51.0559
131.2	-51.0864
131.3	-51.1475
131.4	-51.0559
131.5	-51.2085
131.6	-51.0864
131.7	-51.2085
131.8	-51.2085
131.9	-51.0559
132	-51.1169
132.1	-51.0864
132.2	-51.1475
132.3	-51.239
132.4	-51.178
132.5	-51.0864
132.6	-51.178
132.7	-51.0559
132.8	-51.178
132.9	-51.1475
133	-51.1169
133.1	-51.2085
133.2	-51.0864
133.3	-51.239
133.4	-51.1475
133.5	-51.1475
133.6	-51.0864
133.7	-51.178
133.8	-51.2085
133.9	-51.178
134	-51.1169
134.1	-51.0864
134.2	-51.2085
134.3	-51.178
134.4	-51.2085
134.5	-51.178
134.6	-51.1475
134.7	-51.178
134.8	-51.3
134.9	-51.0864
135	-51.1169
135.1	-51.2085
135.2	-51.178
135.3	-51.2695
135.4	-51.1169
135.5	-51.2085
135.6	-51.178
135.7	-51.239
135.8	-51.178
135.9	-51.1169
136	-51.239
136.1	-51.0864
136.2	-51.239
136.3	-51.1169
136.4	-51.178
136.5	-51.1169
136.6	-51.1169
136.7	-51.2085
136.8	-51.1169
136.9	-51.178
137	-51.1169
137.1	-51.178
137.2	-51.1475
137.3	-51.178
137.4	-51.0864
137.5	-51.239
137.6	-51.0864
137.7	-51.1169
137.8	-51.239
137.9	-50.9949
138	-51.1475
138.1	-51.0254
138.2	-51.178
138.3	-51.1475
138.4	-51.0254
138.5	-51.1169
138.6	-51.0864
138.7	-51.1475
138.8	-51.1475
138.9	-51.0559
139	-51.0559
139.1	-51.0254
139.2	-51.0864
139.3	-51.178
139.4	-51.0559
139.5	-51.1475
139.6	-51.0559
139.7	-51.0559
139.8	-51.2085
139.9	-51.0559
140	-51.239
140.1	-51.1169
140.2	-51.1169
140.3	-51.1475
140.4	-51.1475
140.5	-51.1475
140.6	-51.178
140.7	-51.178
140.8	-51.178
140.9	-51.2085
141	-51.2695
141.1	-51.239
141.2	-51.239
141.3	-51.2695
141.4	-51.178
141.5	-51.239
141.6	-51.2695
141.7	-51.1169
141.8	-51.3
141.9	-51.2085
142	-51.3916
142.1	-51.3
142.2	-51.0864
142.3	-51.2695
142.4	-51.239
142.5	-51.2085
142.6	-51.178
142.7	-51.2085
142.8	-51.239
142.9	-51.239
143	-51.2695
143.1	-51.1475
143.2	-51.3
143.3	-51.178
143.4	-51.2085
143.5	-51.3
143.6	-51.1169
143.7	-51.2695
143.8	-51.2085
143.9	-51.1169
144	-51.2695
144.1	-51.1475
144.2	-51.2085
144.3	-51.178
144.4	-51.0864
144.5	-51.3306
144.6	-51.2085
144.7	-51.2085
144.8	-51.1475
144.9	-51.178
145	-51.2695
145.1	-51.2085
145.2	-51.239
145.3	-51.0864
145.4	-51.239
145.5	-51.2695
145.6	-51.239
145.7	-51.2085
145.8	-51.178
145.9	-51.239
146	-51.239
146.1	-51.178
146.2	-51.1475
146.3	-51.2085
146.4	-51.2695
146.5	-51.239
146.6	-51.239
146.7	-51.239
146.8	-51.178
146.9	-51.2695
147	-51.1475
147.1	-51.3306
147.2	-51.2085
147.3	-51.239
147.4	-51.3306
147.5	-51.0864
147.6	-51.3611
147.7	-51.178
147.8	-51.3306
147.9	-51.2695
148	-51.2085
148.1	-51.2695
148.2	-51.1475
148.3	-51.3916
148.4	-51.3
148.5	-51.3306
148.6	-51.3306
148.7	-51.2085
148.8	-51.3611
148.9	-51.239
149	-51.239
149.1	-51.3306
149.2	-51.3306
149.3	-51.3306
149.4	-51.2695
149.5	-51.3
149.6	-51.3916
149.7	-51.3
149.8	-51.3611
149.9	-51.2085
150	-51.3
150.1	-51.2085
150.2	-51.2695
150.3	-51.3916
150.4	-51.1475
150.5	-51.3
150.6	-51.2085
150.7	-51.2085
150.8	-51.2695
150.9	-51.1169
151	-51.2695
151.1	-51.1169
151.2	-51.178
151.3	-51.178
151.4	-51.2085
151.5	-51.178
151.6	-51.2085
151.7	-51.178
151.8	-51.2085
151.9	-51.1475
152	-51.1475
152.1	-51.1475
152.2	-51.2085
152.3	-51.239
152.4	-51.2085
152.5	-51.2695
152.6	-51.178
152.7	-51.3
152.8	-51.2085
152.9	-51.1169
153	-51.2085
153.1	-51.1169
153.2	-51.3
153.3	-51.2085
153.4	-51.2085
153.5	-51.1169
153.6	-51.2085
153.7	-51.239
153.8	-51.2085
153.9	-51.1169
154	-51.178
154.1	-51.3306
154.2	-51.178
154.3	-51.3
154.4	-51.178
154.5	-51.178
154.6	-51.239
154.7	-51.178
154.8	-51.239
154.9	-51.2085
155	-51.2695
155.1	-51.2695
155.2	-51.2085
155.3	-51.178
155.4	-51.2085
155.5	-51.2695
155.6	-51.1475
155.7	-51.1475
155.8	-51.178
155.9	-51.178
156	-51.2695
156.1	-51.178
156.2	-51.178
156.3	-51.2695
156.4	-51.1169
156.5	-51.3
156.6	-51.1169
156.7	-51.178
156.8	-51.2695
156.9	-51.1475
157	-51.3
157.1	-51.0864
157.2	-51.178
157.3	-51.1475
157.4	-51.178
157.5	-51.1475
157.6	-51.1475
157.7	-51.239
157.8	-51.0864
157.9	-51.1475
158	-51.1475
158.1	-51.1475
158.2	-51.2085
158.3	-51.1169
158.4	-51.0559
158.5	-51.1475
158.6	-51.1169
158.7	-51.1169
158.8	-51.1169
158.9	-50.9949
159	-51.239
159.1	-51.0559
159.2	-51.1169
159.3	-51.178
159.4	-51.1169
159.5	-51.2085
159.6	-51.1475
159.7	-51.0864
159.8	-51.2085
159.9	-51.1169
160	-51.239
160.1	-51.178
160.2	-51.178
160.3	-51.178
160.4	-51.239
160.5	-51.178
160.6	-51.3306
160.7	-51.1475
160.8	-51.239
160.9	-51.2695
161	-51.239
161.1	-51.239
161.2	-51.3
161.3	-51.239
161.4	-51.2695
161.5	-51.2695
161.6	-51.2695
161.7	-51.239
161.8	-51.2695
161.9	-51.3306
162	-51.2085
162.1	-51.2695
162.2	-51.178
162.3	-51.178
162.4	-51.3
162.5	-51.2695
162.6	-51.3306
162.7	-51.239
162.8	-51.2695
162.9	-51.178
163	-51.2085
163.1	-51.1475
163.2	-51.2695
163.3	-51.2695
163.4	-51.178
163.5	-51.3
163.6	-51.239
163.7	-51.1475
163.8	-51.3306
163.9	-51.178
164	-51.178
164.1	-51.2695
164.2	-51.2085
164.3	-51.239
164.4	-51.239
164.5	-51.0864
164.6	-51.239
164.7	-51.2695
164.8	-51.178
164.9	-51.2085
165	-51.2695
165.1	-51.0559
165.2	-51.239
165.3	-51.239
165.4	-51.0864
165.5	-51.239
165.6	-51.1169
165.7	-51.239
165.8	-51.3
165.9	-51.1169
166	-51.3306
166.1	-51.0559
166.2	-51.3
166.3	-51.178
166.4	-51.2695
166.5	-51.239
166.6	-51.178
166.7	-51.239
166.8	-51.2085
166.9	-51.239
167	-51.178
167.1	-51.1475
167.2	-51.3
167.3	-51.2695
167.4	-51.2085
167.5	-51.2695
167.6	-51.239
167.7	-51.3306
167.8	-51.1475
167.9	-51.239
168	-51.2085
168.1	-51.3306
168.2	-51.3611
168.3	-51.239
168.4	-51.3916
168.5	-51.239
168.6	-51.3916
168.7	-51.2695
168.8	-51.3306
168.9	-51.3916
169	-51.2085
169.1	-51.3916
169.2	-51.239
169.3	-51.3306
169.4	-51.3
169.5	-51.2085
169.6	-51.3306
169.7	-51.239
169.8	-51.3306
169.9	-51.2695
170	-51.239
170.1	-51.239
170.2	-51.2695
170.3	-51.1475
170.4	-51.3
170.5	-51.1475
170.6	-51.239
170.7	-51.0864
170.8	-51.0864
170.9	-51.2695
171	-51.1169
171.1	-51.239
171.2	-51.1475
171.3	-51.178
171.4	-51.178
171.5	-51.178
171.6	-51.178
171.7	-51.1169
171.8	-51.1169
171.9	-51.1475
172	-51.3
172.1	-51.0864
172.2	-51.239
172.3	-51.0559
172.4	-51.1475
172.5	-51.3
172.6	-51.0559
172.7	-51.239
172.8	-51.0864
172.9	-51.1169
173	-51.3
173.1	-51.1475
173.2	-51.2085
173.3	-51.239
173.4	-51.0559
173.5	-51.3
173.6	-51.2085
173.7	-51.1475
173.8	-51.2085
173.9	-51.178
174	-51.239
174.1	-51.178
174.2	-51.2085
174.3	-51.1169
174.4	-51.2085
174.5	-51.3
174.6	-51.1169
174.7	-51.2085
174.8	-51.1475
174.9	-51.1475
175	-51.2695
175.1	-51.178
175.2	-51.1169
175.3	-51.239
175.4	-51.2085
175.5	-51.1475
175.6	-51.3
175.7	-51.0864
175.8	-51.2695
175.9	-51.0864
176	-51.178
176.1	-51.1475
176.2	-51.0864
176.3	-51.2085
176.4	-51.0559
176.5	-51.178
176.6	-51.1169
176.7	-51.1475
176.8	-51.3
176.9	-50.9949
177	-51.178
177.1	-51.1475
177.2	-51.1169
177.3	-51.178
177.4	-51.0864
177.5	-51.0864
177.6	-51.1475
177.7	-51.1475
177.8	-51.1475
177.9	-51.1475
178	-51.1169
178.1	-51.0254
178.2	-51.2085
178.3	-51.0254
178.4	-51.0864
178.5	-51.1169
178.6	-50.9949
178.7	-51.178
178.8	-51.0254
178.9	-50.9338
179	-50.9644
179.1	-51.0559
179.2	-51.0864
179.3	-51.0559
179.4	-51.1475
179.5	-50.9949
179.6	-51.0864
179.7	-51.1169
179.8	-51.1169
179.9	-51.0559
180	-51.1475
180.1	-51.0559
180.2	-51.2085
180.3	-51.1475
180.4	-51.1475
180.5	-51.239
180.6	-51.1169
180.7	-51.2695
180.8	-51.178
180.9	-51.178
181	-51.239
181.1	-51.1475
181.2	-51.3306
181.3	-51.1169
181.4	-51.2695
181.5	-51.2085
181.6	-51.178
181.7	-51.2695
181.8	-51.239
181.9	-51.2085
182	-51.239
182.1	-51.1475
182.2	-51.178
182.3	-51.178
182.4	-51.0864
182.5	-51.239
182.6	-51.3
182.7	-51.2085
182.8	-51.2695
182.9	-51.0254
183	-51.0864
183.1	-51.0864
183.2	-51.1169
183.3	-51.2085
183.4	-51.2695
183.5	-51.0864
183.6	-51.2085
183.7	-50.9949
183.8	-51.0864
183.9	-51.178
184	-51.0864
184.1	-51.239
184.2	-51.0864
184.3	-51.1475
184.4	-51.178
184.5	-51.2085
184.6	-51.0864
184.7	-51.1169
184.8	-51.2085
184.9	-51.1475
185	-51.239
185.1	-51.1169
185.2	-51.178
185.3	-51.1475
185.4	-51.1475
185.5	-51.239
185.6	-51.1475
185.7	-51.0864
185.8	-51.1169
185.9	-51.2085
186	-51.1475
186.1	-51.2085
186.2	-51.1475
186.3	-51.2695
186.4	-51.1169
186.5	-51.239
186.6	-51.178
186.7	-51.1475
186.8	-51.239
186.9	-51.1475
187	-51.3306
187.1	-51.1475
187.2	-51.3
187.3	-51.2695
187.4	-51.1475
187.5	-51.3
187.6	-51.0254
187.7	-51.3
187.8	-51.2695
187.9	-51.2085
188	-51.2695
188.1	-51.1475
188.2	-51.239
188.3	-51.2085
188.4	-51.3
188.5	-51.239
188.6	-51.239
188.7	-51.239
188.8	-51.2695
188.9	-51.3611
189	-51.3916
189.1	-51.178
189.2	-51.2695
189.3	-51.1169
189.4	-51.3
189.5	-51.2695
189.6	-51.178
189.7	-51.3
189.8	-51.1475
189.9	-51.2085
190	-51.1475
190.1	-51.178
190.2	-51.1169
190.3	-51.0864
190.4	-51.2695
190.5	-51.0864
190.6	-51.178
190.7	-51.0864
190.8	-51.1169
190.9	-51.1475
191	-51.0864
191.1	-51.1169
191.2	-51.2085
191.3	-51.0559
191.4	-51.0864
191.5	-51.1475
191.6	-51.0559
191.7	-51.1475
191.8	-51.0864
191.9	-50.9644
192	-51.0864
192.1	-51.1169
192.2	-51.1169
192.3	-51.239
192.4	-51.0864
192.5	-51.0559
192.6	-51.1475
192.7	-51.0254
192.8	-51.1475
192.9	-51.0864
193	-51.178
193.1	-51.178
193.2	-51.1475
193.3	-51.1475
193.4	-51.1169
193.5	-51.2085
193.6	-51.0254
193.7	-51.239
193.8	-51.178
193.9	-51.0864
194	-51.2085
194.1	-51.0559
194.2	-51.2085
194.3	-51.1169
194.4	-51.1169
194.5	-51.178
194.6	-51.1475
194.7	-51.178
194.8	-51.239
194.9	-51.0864
195	-51.1475
195.1	-51.0254
195.2	-51.2695
195.3	-51.0864
195.4	-51.178
195.5	-51.1169
195.6	-51.0864
195.7	-51.2085
195.8	-51.0864
195.9	-51.0864
196	-51.2085
196.1	-51.0254
196.2	-51.2695
196.3	-51.1475
196.4	-51.1169
196.5	-51.0559
196.6	-51.2085
196.7	-51.178
196.8	-51.0559
196.9	-51.0864
197	-51.0254
197.1	-51.1475
197.2	-51.1169
197.3	-51.0864
197.4	-51.0559
197.5	-51.0254
197.6	-51.2085
197.7	-51.0559
197.8	-51.0559
197.9	-51.1475
198	-51.0254
198.1	-51.0254
198.2	-51.0559
198.3	-51.0254
198.4	-51.1169
198.5	-50.9949
198.6	-51.1475
198.7	-50.9644
198.8	-51.0559
198.9	-50.9338
199	-50.9338
199.1	-51.1475
199.2	-50.9338
199.3	-51.1475
199.4	-51.0864
199.5	-51.0254
199.6	-51.1169
[truncated: 98,004 more rows]

## Sheet: Figure 5 G i down
CON	TRPC6-KD
-45.29	-54.2
-52.03	-49.9
-50.78	-58.04
-48.28	-61.37
-50.78	-52.73
-51.33	-56.58
-50.02	-60.18
-52	-58.2
-50.8	-62.1
-51.09	-69.85

## Sheet: Figure 5 G ii
Example traces
TRPC6 KD
Time(ms)	RMP(mV)
0	-58.3191
0.09961	-58.4412
0.20117	-58.4106
0.30078	-58.3496
0.40039	-58.4717
0.5	-58.3801
0.59961	-58.3801
0.70117	-58.3496
0.80078	-58.3496
0.90039	-58.4412
1	-58.2886
1.09961	-58.4717
1.20117	-58.2275
1.30078	-58.4106
1.40039	-58.3191
1.5	-58.3801
1.59961	-58.3191
1.70117	-58.3496
1.80078	-58.3496
1.90039	-58.2886
2	-58.3496
2.09961	-58.2581
2.20117	-58.2275
2.30078	-58.2581
2.40039	-58.2581
2.5	-58.3496
2.59961	-58.3191
2.70117	-58.2581
2.80078	-58.3191
2.90039	-58.2886
3	-58.3191
3.09961	-58.4412
3.20117	-58.2886
3.30078	-58.4717
3.40039	-58.3191
3.5	-58.4106
3.59961	-58.3496
3.70117	-58.3496
3.80078	-58.4412
3.90039	-58.3496
4	-58.4717
4.09961	-58.4106
4.20117	-58.3801
4.30078	-58.4717
4.40039	-58.4106
4.5	-58.4412
4.59961	-58.4412
4.70117	-58.3801
4.80078	-58.5022
4.90039	-58.5327
5	-58.3496
5.09961	-58.5632
5.20117	-58.4106
5.30078	-58.4717
5.40039	-58.4412
5.5	-58.4412
5.59961	-58.3801
5.70117	-58.2886
5.80078	-58.2581
5.90039	-58.3801
6	-58.4412
6.09961	-58.3191
6.20117	-58.4412
6.30078	-58.4412
6.40039	-58.3801
6.5	-58.4412
6.59961	-58.3496
6.70117	-58.4412
6.80078	-58.4412
6.90039	-58.3496
7	-58.4106
7.09961	-58.4412
7.20117	-58.3191
7.30078	-58.3801
7.40039	-58.4106
7.5	-58.2886
7.59961	-58.4717
7.70117	-58.3191
7.80078	-58.4412
7.90039	-58.4412
8	-58.4412
8.09961	-58.3191
8.20117	-58.4412
8.30078	-58.3801
8.40039	-58.2581
8.5	-58.5022
8.59961	-58.3191
8.70117	-58.4106
8.80078	-58.4106
8.90039	-58.3496
9	-58.3496
9.09961	-58.4717
9.20117	-58.2886
9.30078	-58.4412
9.40039	-58.3496
9.5	-58.4106
9.59961	-58.4412
9.70117	-58.4106
9.80078	-58.4412
9.90039	-58.3801
10	-58.4412
10.0996	-58.2581
10.2012	-58.5327
10.3008	-58.4717
10.4004	-58.2886
10.5	-58.5632
10.5996	-58.3801
10.7012	-58.5327
10.8008	-58.3496
10.9004	-58.5022
11	-58.4106
11.0996	-58.4412
11.2012	-58.4106
11.3008	-58.3801
11.4004	-58.5327
11.5	-58.4106
11.5996	-58.5327
11.7012	-58.5327
11.8008	-58.4106
11.9004	-58.5022
12	-58.4717
12.0996	-58.4412
12.2012	-58.5327
12.3008	-58.4717
12.4004	-58.4717
12.5	-58.4717
12.5996	-58.4717
12.7012	-58.4412
12.8008	-58.4412
12.9004	-58.5327
13	-58.3801
13.0996	-58.5022
13.2012	-58.4412
13.3008	-58.3496
13.4004	-58.5022
13.5	-58.2886
13.5996	-58.4412
13.7012	-58.4412
13.8008	-58.2886
13.9004	-58.3801
14	-58.3191
14.0996	-58.3191
14.2012	-58.3496
14.3008	-58.3801
14.4004	-58.3191
14.5	-58.4412
14.5996	-58.2886
14.7012	-58.3801
14.8008	-58.2886
14.9004	-58.2581
15	-58.4412
15.0996	-58.3191
15.2012	-58.3496
15.3008	-58.2886
15.4004	-58.4412
15.5	-58.3801
15.5996	-58.3496
15.7012	-58.4412
15.8008	-58.4412
15.9004	-58.2886
16	-58.3191
16.0996	-58.4412
16.2012	-58.3801
16.3008	-58.5327
16.4004	-58.3191
16.5	-58.4106
16.5996	-58.3801
16.7012	-58.2581
16.8008	-58.4106
16.9004	-58.3496
17	-58.4106
17.0996	-58.4106
17.2012	-58.4106
17.3008	-58.2886
17.4004	-58.5022
17.5	-58.3496
17.5996	-58.3496
17.7012	-58.4106
17.8008	-58.3191
17.9004	-58.4412
18	-58.3801
18.0996	-58.4106
18.2012	-58.3191
18.3008	-58.4412
18.4004	-58.2886
18.5	-58.3801
18.5996	-58.3801
18.7012	-58.3801
18.8008	-58.4717
18.9004	-58.3801
19	-58.3801
19.0996	-58.4412
19.2012	-58.3496
19.3008	-58.4106
19.4004	-58.4106
19.5	-58.2886
19.5996	-58.3801
19.7012	-58.4106
19.8008	-58.2581
19.9004	-58.4717
20	-58.197
20.0996	-58.4412
20.2012	-58.3191
20.3008	-58.3496
20.4004	-58.2581
20.5	-58.2886
20.5996	-58.3801
20.7012	-58.2886
20.8008	-58.4412
20.9004	-58.2275
21	-58.4412
21.0996	-58.2886
21.2012	-58.3496
21.3008	-58.3191
21.4004	-58.2581
21.5	-58.2886
21.5996	-58.2581
21.7012	-58.3496
21.8008	-58.3191
21.9004	-58.3191
22	-58.3496
22.0996	-58.2275
22.2012	-58.2581
22.3008	-58.2581
22.4004	-58.2581
22.5	-58.3191
22.5996	-58.3191
22.7012	-58.2581
22.8008	-58.3496
22.9004	-58.2275
23	-58.3191
23.0996	-58.2275
23.2012	-58.3496
23.3008	-58.3191
23.4004	-58.2581
23.5	-58.4106
23.5996	-58.3191
23.7012	-58.4412
23.8008	-58.3496
23.9004	-58.3496
24	-58.3801
24.0996	-58.3801
24.2012	-58.3496
24.3008	-58.4106
24.4004	-58.4106
24.5	-58.3801
24.5996	-58.4412
24.7012	-58.2886
24.8008	-58.4412
24.9004	-58.3801
25	-58.5022
25.0996	-58.4717
25.2012	-58.3191
25.3008	-58.3801
25.4004	-58.4106
25.5	-58.5327
25.5996	-58.5632
25.7012	-58.4106
25.8008	-58.3496
25.9004	-58.5327
26	-58.4412
26.0996	-58.5022
26.2012	-58.4106
26.3008	-58.3191
26.4004	-58.3496
26.5	-58.4106
26.5996	-58.3496
26.7012	-58.4412
26.8008	-58.3801
26.9004	-58.3496
27	-58.4412
27.0996	-58.2886
27.2012	-58.3801
27.3008	-58.3801
27.4004	-58.3496
27.5	-58.4412
27.5996	-58.3496
27.7012	-58.3191
27.8008	-58.3191
27.9004	-58.3496
28	-58.2581
28.0996	-58.4412
28.2012	-58.4717
28.3008	-58.2581
28.4004	-58.4106
28.5	-58.3801
28.5996	-58.2581
28.7012	-58.3496
28.8008	-58.3801
28.9004	-58.3496
29	-58.3801
29.0996	-58.2886
29.2012	-58.2886
29.3008	-58.4412
29.4004	-58.3496
29.5	-58.4106
29.5996	-58.2275
29.7012	-58.5022
29.8008	-58.4412
29.9004	-58.3191
30	-58.3191
30.0996	-58.4106
30.2012	-58.5327
30.3008	-58.3191
30.4004	-58.4412
30.5	-58.4412
30.5996	-58.4412
30.7012	-58.2581
30.8008	-58.4412
30.9004	-58.4412
31	-58.4106
31.0996	-58.4717
31.2012	-58.3801
31.3008	-58.3496
31.4004	-58.4717
31.5	-58.3496
31.5996	-58.4412
31.7012	-58.4412
31.8008	-58.4106
31.9004	-58.4412
32	-58.4717
32.0996	-58.4717
32.2012	-58.5327
32.3008	-58.5022
32.4004	-58.4717
32.5	-58.4412
32.5996	-58.4717
32.7012	-58.2275
32.8008	-58.5022
32.9004	-58.5022
33	-58.4106
33.0996	-58.5022
33.2012	-58.3191
33.3008	-58.4106
33.4004	-58.4106
33.5	-58.2886
33.5996	-58.4106
33.7012	-58.3496
33.8008	-58.3191
33.9004	-58.3191
34	-58.3191
34.0996	-58.2886
34.2012	-58.3496
34.3008	-58.2886
34.4004	-58.3496
34.5	-58.2886
34.5996	-58.3191
34.7012	-58.2886
34.8008	-58.2275
34.9004	-58.3801
35	-58.2275
35.0996	-58.3496
35.2012	-58.2886
35.3008	-58.3191
35.4004	-58.2275
35.5	-58.2581
35.5996	-58.3191
35.7012	-58.3496
35.8008	-58.2886
35.9004	-58.3191
36	-58.3801
36.0996	-58.1665
36.2012	-58.3496
36.3008	-58.3191
36.4004	-58.2886
36.5	-58.3496
36.5996	-58.2581
36.7012	-58.2886
36.8008	-58.3801
36.9004	-58.2886
37	-58.3496
37.0996	-58.4412
37.2012	-58.2886
37.3008	-58.3496
37.4004	-58.3496
37.5	-58.197
37.5996	-58.3801
37.7012	-58.3496
37.8008	-58.3191
37.9004	-58.4106
38	-58.3801
38.0996	-58.2886
38.2012	-58.4106
38.3008	-58.2886
38.4004	-58.2581
38.5	-58.4106
38.5996	-58.2581
38.7012	-58.3496
38.8008	-58.3496
38.9004	-58.2886
39	-58.3191
39.0996	-58.3496
39.2012	-58.2275
39.3008	-58.3496
39.4004	-58.2886
39.5	-58.2886
39.5996	-58.3801
39.7012	-58.2581
39.8008	-58.3191
39.9004	-58.2581
40	-58.3191
40.0996	-58.2581
40.2012	-58.3191
40.3008	-58.2275
40.4004	-58.197
40.5	-58.4106
40.5996	-58.1665
40.7012	-58.3191
40.8008	-58.2886
40.9004	-58.2581
41	-58.3191
41.0996	-58.1665
41.2012	-58.3191
41.3008	-58.136
41.4004	-58.3496
41.5	-58.1665
41.5996	-58.3191
41.7012	-58.197
41.8008	-58.2581
41.9004	-58.2581
42	-58.197
42.0996	-58.1055
42.2012	-58.2275
42.3008	-58.1055
42.4004	-58.2581
42.5	-58.2275
42.5996	-58.197
42.7012	-58.2886
42.8008	-58.1665
42.9004	-58.2275
43	-58.197
43.0996	-58.2275
43.2012	-58.2886
43.3008	-58.197
43.4004	-58.3191
43.5	-58.2275
43.5996	-58.2581
43.7012	-58.2886
43.8008	-58.2275
43.9004	-58.3191
44	-58.2886
44.0996	-58.2886
44.2012	-58.3496
44.3008	-58.3191
44.4004	-58.2581
44.5	-58.3801
44.5996	-58.2581
44.7012	-58.4106
44.8008	-58.3191
44.9004	-58.2581
45	-58.3191
45.0996	-58.2886
45.2012	-58.3496
45.3008	-58.3191
45.4004	-58.3801
45.5	-58.3801
45.5996	-58.3496
45.7012	-58.2275
45.8008	-58.3191
45.9004	-58.2275
46	-58.2581
46.0996	-58.3496
46.2012	-58.1665
46.3008	-58.3496
46.4004	-58.2886
46.5	-58.2886
46.5996	-58.3801
46.7012	-58.3496
46.8008	-58.197
46.9004	-58.2275
47	-58.2275
47.0996	-58.2581
47.2012	-58.3801
47.3008	-58.2581
47.4004	-58.2275
47.5	-58.2886
47.5996	-58.1665
47.7012	-58.2581
47.8008	-58.2886
47.9004	-58.197
48	-58.2581
48.0996	-58.3496
48.2012	-58.1665
48.3008	-58.3191
48.4004	-58.2275
48.5	-58.2581
48.5996	-58.2275
48.7012	-58.2886
48.8008	-58.197
48.9004	-58.2581
49	-58.2275
49.0996	-58.2581
49.2012	-58.2886
49.3008	-58.136
49.4004	-58.3191
49.5	-58.1665
49.5996	-58.2275
49.7012	-58.2581
49.8008	-58.197
49.9004	-58.2581
50	-58.2275
50.0996	-58.3191
50.2012	-58.2581
50.3008	-58.3191
50.4004	-58.2886
50.5	-58.1665
50.5996	-58.3496
50.7012	-58.1665
50.8008	-58.3801
50.9004	-58.2275
51	-58.3801
51.0996	-58.2581
51.2012	-58.2581
51.3008	-58.2886
51.4004	-58.3496
51.5	-58.3191
51.5996	-58.3496
51.7012	-58.3496
51.8008	-58.3191
51.9004	-58.2886
52	-58.3191
52.0996	-58.3496
52.2012	-58.3801
52.3008	-58.3496
52.4004	-58.2275
52.5	-58.3191
52.5996	-58.3496
52.7012	-58.2275
52.8008	-58.5022
52.9004	-58.2581
53	-58.3801
53.0996	-58.2886
53.2012	-58.2886
53.3008	-58.2275
53.4004	-58.2581
53.5	-58.2581
53.5996	-58.2581
53.7012	-58.2581
53.8008	-58.2275
53.9004	-58.1665
54	-58.1665
54.0996	-58.136
54.2012	-58.136
54.3008	-58.197
54.4004	-58.136
54.5	-58.1055
54.5996	-58.2275
54.7012	-58.075
54.8008	-58.2886
54.9004	-58.136
55	-58.136
55.0996	-58.197
55.2012	-58.1055
55.3008	-58.136
55.4004	-58.197
55.5	-58.1055
55.5996	-58.1665
55.7012	-58.197
55.8008	-58.136
55.9004	-58.2275
56	-58.1055
56.0996	-58.136
56.2012	-58.2275
56.3008	-58.136
56.4004	-58.2275
56.5	-58.1665
56.5996	-58.136
56.7012	-58.1665
56.8008	-58.2275
56.9004	-58.136
57	-58.2275
57.0996	-58.1665
57.2012	-58.136
57.3008	-58.2581
57.4004	-58.1055
57.5	-58.197
57.5996	-58.2581
57.7012	-58.197
57.8008	-58.1665
57.9004	-58.2581
58	-58.1055
58.0996	-58.197
58.2012	-58.2275
58.3008	-58.0444
58.4004	-58.2275
58.5	-58.1665
58.5996	-58.136
58.7012	-58.1665
58.8008	-58.1665
58.9004	-58.075
59	-58.197
59.0996	-58.1055
59.2012	-58.197
59.3008	-58.1665
59.4004	-58.136
59.5	-58.2275
59.5996	-58.1055
59.7012	-58.2275
59.8008	-58.1055
59.9004	-58.136
60	-58.197
60.0996	-58.1055
60.2012	-58.2275
60.3008	-58.0139
60.4004	-58.197
60.5	-58.0444
60.5996	-58.136
60.7012	-58.075
60.8008	-58.1055
60.9004	-58.075
61	-58.1055
61.0996	-58.075
61.2012	-58.1055
61.3008	-58.075
61.4004	-58.1665
61.5	-57.9834
61.5996	-58.136
61.7012	-58.0444
61.8008	-58.075
61.9004	-58.136
62	-58.0444
62.0996	-58.0139
62.2012	-58.075
62.3008	-57.9834
62.4004	-58.1055
62.5	-58.0444
62.5996	-58.136
62.7012	-58.0139
62.8008	-58.075
62.9004	-58.0444
63	-57.9529
63.0996	-58.1665
63.2012	-58.0444
63.3008	-58.136
63.4004	-58.1055
63.5	-58.0139
63.5996	-58.1055
63.7012	-58.1055
63.8008	-58.136
63.9004	-58.1665
64	-58.1055
64.0996	-58.197
64.2012	-58.2275
64.3008	-58.1055
64.4004	-58.1665
64.5	-58.075
64.5996	-58.2275
64.7012	-58.197
64.8008	-58.1665
64.9004	-58.2275
65	-58.075
65.0996	-58.2275
65.2012	-58.1665
65.3008	-58.1665
65.4004	-58.1665
65.5	-58.1665
65.5996	-58.075
65.7012	-58.136
65.8008	-58.136
65.9004	-58.1055
66	-58.2275
66.0996	-58.1055
66.2012	-58.2886
66.3008	-58.1665
66.4004	-58.075
66.5	-58.136
66.5996	-58.136
66.7012	-58.1055
66.8008	-58.075
66.9004	-58.1665
67	-58.136
67.0996	-58.2275
67.2012	-57.9834
67.3008	-58.1665
67.4004	-58.075
67.5	-58.0444
67.5996	-58.136
67.7012	-58.0444
67.8008	-58.0444
67.9004	-58.075
68	-58.136
68.0996	-58.0139
68.2012	-58.136
68.3008	-58.1055
68.4004	-58.0139
68.5	-58.1055
68.5996	-58.0139
68.7012	-58.136
68.8008	-58.1055
68.9004	-58.075
69	-58.1055
69.0996	-58.1665
69.2012	-58.075
69.3008	-58.075
69.4004	-58.136
69.5	-58.0139
69.5996	-58.197
69.7012	-57.9224
69.8008	-58.2275
69.9004	-58.0444
70	-58.1665
70.0996	-58.075
70.2012	-58.075
70.3008	-58.136
70.4004	-58.136
70.5	-58.1665
70.5996	-58.075
70.7012	-58.2275
70.8008	-58.1055
70.9004	-58.1055
71	-58.2275
71.0996	-58.1055
71.2012	-58.1665
71.3008	-58.0139
71.4004	-58.2581
71.5	-58.075
71.5996	-58.2275
71.7012	-58.1665
71.8008	-58.1665
71.9004	-58.1055
72	-58.136
72.0996	-58.1055
72.2012	-58.197
72.3008	-58.136
72.4004	-58.1665
72.5	-58.1055
72.5996	-58.1665
72.7012	-58.136
72.8008	-58.1665
72.9004	-58.197
73	-58.136
73.0996	-58.1055
73.2012	-58.1665
73.3008	-57.9529
73.4004	-58.197
73.5	-58.075
73.5996	-58.1055
73.7012	-58.136
73.8008	-58.0444
73.9004	-58.1055
74	-58.0444
74.0996	-58.0139
74.2012	-58.0444
74.3008	-58.075
74.4004	-58.0139
74.5	-58.1055
74.5996	-57.9224
74.7012	-57.9834
74.8008	-58.0139
74.9004	-58.0139
75	-58.0444
75.0996	-57.9529
75.2012	-58.075
75.3008	-58.0139
75.4004	-58.0444
75.5	-58.0139
75.5996	-58.0444
75.7012	-58.0444
75.8008	-58.1055
75.9004	-57.9834
76	-58.0444
76.0996	-57.9834
76.2012	-58.1055
76.3008	-58.075
76.4004	-58.0139
76.5	-58.0444
76.5996	-58.136
76.7012	-58.0444
76.8008	-58.0444
76.9004	-58.1055
77	-58.075
77.0996	-58.075
77.2012	-58.075
77.3008	-57.9529
77.4004	-58.136
77.5	-58.075
77.5996	-58.0139
77.7012	-58.0139
77.8008	-58.0139
77.9004	-58.0139
78	-58.075
78.0996	-58.136
78.2012	-58.0139
78.3008	-58.075
78.4004	-57.9834
78.5	-58.075
78.5996	-58.1055
78.7012	-58.075
78.8008	-58.0444
78.9004	-58.0444
79	-58.075
79.0996	-58.0139
79.2012	-58.0444
79.3008	-58.0139
79.4004	-58.1055
79.5	-57.8918
79.5996	-58.1055
79.7012	-57.9834
79.8008	-57.9834
79.9004	-58.0444
80	-57.9529
80.0996	-58.075
80.2012	-57.9834
80.3008	-58.0444
80.4004	-57.9834
80.5	-57.9529
80.5996	-57.9224
80.7012	-57.9529
80.8008	-58.136
80.9004	-57.8613
81	-58.075
81.0996	-57.8918
81.2012	-58.0139
81.3008	-57.9224
81.4004	-57.8613
81.5	-57.8613
81.5996	-57.9224
81.7012	-57.9834
81.8008	-57.9224
81.9004	-58.0139
82	-58.0139
82.0996	-57.9224
82.2012	-57.9529
82.3008	-57.8308
82.4004	-57.9224
82.5	-57.9834
82.5996	-57.9224
82.7012	-57.9834
82.8008	-57.9834
82.9004	-57.8003
83	-57.9834
83.0996	-57.8918
83.2012	-58.0139
83.3008	-57.9529
83.4004	-57.9529
83.5	-58.0444
83.5996	-57.9529
83.7012	-58.0444
83.8008	-58.0444
83.9004	-58.0139
84	-58.0444
84.0996	-58.0139
84.2012	-58.075
84.3008	-58.075
84.4004	-57.9834
84.5	-58.075
84.5996	-58.075
84.7012	-58.0444
84.8008	-58.197
84.9004	-57.9834
85	-58.1055
85.0996	-58.075
85.2012	-57.9834
85.3008	-58.0139
85.4004	-58.0444
85.5	-58.197
85.5996	-58.0444
85.7012	-57.9529
85.8008	-58.0444
85.9004	-58.136
86	-58.0139
86.0996	-58.0444
86.2012	-57.9834
86.3008	-57.8918
86.4004	-57.9834
86.5	-58.0139
86.5996	-58.1055
86.7012	-58.075
86.8008	-58.0444
86.9004	-57.9834
87	-58.075
87.0996	-57.9529
87.2012	-57.9529
87.3008	-58.0444
87.4004	-57.9224
87.5	-58.1055
87.5996	-58.0444
87.7012	-58.0139
87.8008	-57.9834
87.9004	-58.075
88	-57.9529
88.0996	-57.9834
88.2012	-57.9529
88.3008	-57.9529
88.4004	-58.1055
88.5	-57.9224
88.5996	-58.0139
88.7012	-58.075
88.8008	-57.8918
88.9004	-58.0139
89	-58.1055
89.0996	-58.0139
89.2012	-57.9834
89.3008	-58.0444
89.4004	-58.0444
89.5	-58.0139
89.5996	-58.0139
89.7012	-58.136
89.8008	-58.0444
89.9004	-58.0444
90	-58.0139
90.0996	-58.1055
90.2012	-58.1055
90.3008	-57.8613
90.4004	-58.197
90.5	-57.9529
90.5996	-58.136
90.7012	-58.0139
90.8008	-58.1055
90.9004	-58.0444
91	-58.0139
91.0996	-58.1055
91.2012	-57.9834
91.3008	-58.1055
91.4004	-58.136
91.5	-58.075
91.5996	-58.1665
91.7012	-58.0139
91.8008	-58.1665
91.9004	-58.0444
92	-58.1665
92.0996	-58.136
92.2012	-58.197
92.3008	-58.197
92.4004	-58.1665
92.5	-58.1055
92.5996	-58.1665
92.7012	-57.9224
92.8008	-58.197
92.9004	-58.0139
93	-58.136
93.0996	-58.1055
93.2012	-58.0444
93.3008	-58.0444
93.4004	-58.0139
93.5	-58.075
93.5996	-58.0444
93.7012	-58.0139
93.8008	-58.0444
93.9004	-57.9834
94	-58.0444
94.0996	-58.0139
94.2012	-58.0139
94.3008	-58.0139
94.4004	-57.9834
94.5	-57.9529
94.5996	-58.0139
94.7012	-57.9224
94.8008	-58.0444
94.9004	-58.0444
95	-57.8918
95.0996	-58.075
95.2012	-57.9224
95.3008	-57.9224
95.4004	-58.0444
95.5	-57.9834
95.5996	-57.9834
95.7012	-58.0139
95.8008	-58.0139
95.9004	-58.0444
96	-58.075
96.0996	-57.8918
96.2012	-58.0139
96.3008	-57.9224
96.4004	-57.9834
96.5	-58.0444
96.5996	-57.9529
96.7012	-58.075
96.8008	-58.0444
96.9004	-58.0444
97	-58.0139
97.0996	-58.075
97.2012	-58.0139
97.3008	-58.0444
97.4004	-57.9834
97.5	-58.0444
97.5996	-58.1055
97.7012	-57.9224
97.8008	-58.0444
97.9004	-58.075
98	-58.0444
98.0996	-58.0139
98.2012	-58.136
98.3008	-57.9529
98.4004	-58.0139
98.5	-58.0444
98.5996	-57.9529
98.7012	-58.136
98.8008	-58.0444
98.9004	-58.0444
99	-58.075
99.0996	-58.0444
99.2012	-58.0139
99.3008	-58.0444
99.4004	-57.9529
99.5	-57.9834
99.5996	-58.0139
99.7012	-58.0444
99.8008	-58.075
99.9004	-57.9529
100	-58.075
100.1	-57.9529
100.201	-58.0444
100.301	-57.8613
100.4	-58.075
100.5	-57.9224
100.6	-57.9529
100.701	-58.0139
100.801	-57.9529
100.9	-58.0139
101	-57.9834
101.1	-58.0139
101.201	-57.9224
101.301	-57.8918
101.4	-58.0139
101.5	-57.8003
101.6	-58.075
101.701	-57.9224
101.801	-58.075
101.9	-57.9224
102	-58.0444
102.1	-57.9224
102.201	-57.9224
102.301	-57.8918
102.4	-57.9224
102.5	-57.9834
102.6	-57.9529
102.701	-57.9224
102.801	-58.0139
102.9	-57.9224
103	-57.9834
103.1	-57.9529
103.201	-57.9224
103.301	-57.9834
103.4	-58.0444
103.5	-57.9224
103.6	-58.1055
103.701	-57.9224
103.801	-58.1055
103.9	-58.075
104	-58.0444
104.1	-58.075
104.201	-58.0139
104.301	-57.9834
104.4	-58.0444
104.5	-58.1055
104.6	-58.1055
104.701	-58.136
104.801	-58.136
104.9	-58.1055
105	-57.9834
105.1	-58.075
105.201	-58.075
105.301	-57.9834
105.4	-58.1665
105.5	-58.0444
105.6	-58.136
105.701	-58.0139
105.801	-57.9224
105.9	-58.1055
106	-58.075
106.1	-58.0139
106.201	-58.0444
106.301	-58.0444
106.4	-57.9834
106.5	-58.1665
106.6	-57.9834
106.701	-58.075
106.801	-58.1055
106.9	-58.0139
107	-58.075
107.1	-58.0139
107.201	-58.0139
107.301	-58.0444
107.4	-58.0444
107.5	-58.0139
107.6	-58.136
107.701	-58.0444
107.801	-57.9834
107.9	-58.1055
108	-58.0139
108.1	-58.0444
108.201	-58.1055
108.301	-58.075
108.4	-58.0139
108.5	-58.075
108.6	-58.0139
108.701	-58.0444
108.801	-58.075
108.9	-57.9529
109	-58.0444
109.1	-58.0444
109.201	-58.075
109.301	-58.075
109.4	-58.0444
109.5	-58.136
109.6	-58.1665
109.701	-58.0139
109.801	-58.1665
109.9	-58.0139
110	-58.075
110.1	-58.0139
110.201	-58.1665
110.301	-58.075
110.4	-58.136
110.5	-58.1665
110.6	-58.0139
110.701	-58.1055
110.801	-58.075
110.9	-58.1665
111	-58.2275
111.1	-58.136
111.201	-58.1665
111.301	-58.0444
111.4	-58.2581
111.5	-58.075
111.6	-58.197
111.701	-58.2275
111.801	-58.136
111.9	-58.2581
112	-58.1055
112.1	-58.2581
112.201	-58.197
112.301	-58.2275
112.4	-58.2275
112.5	-58.0444
112.6	-58.197
112.701	-58.1055
112.801	-58.2275
112.9	-58.1665
113	-58.197
113.1	-58.136
113.201	-58.136
113.301	-58.075
113.4	-58.197
113.5	-58.0139
113.6	-58.1665
113.701	-58.1055
113.801	-58.0139
113.9	-58.1665
114	-57.9834
114.1	-58.136
114.201	-58.0444
114.301	-58.0444
114.4	-58.075
114.5	-58.0139
114.6	-58.0139
114.701	-58.0444
114.801	-58.075
114.9	-58.075
115	-58.075
115.1	-58.0444
115.201	-58.0139
115.301	-57.8613
115.4	-58.0444
115.5	-58.075
115.6	-57.9224
115.701	-58.1665
115.801	-58.1055
115.9	-58.1055
116	-58.075
116.1	-58.0444
116.201	-58.075
116.301	-58.075
116.4	-58.0444
116.5	-58.075
116.6	-58.136
116.701	-58.0139
116.801	-58.2581
116.9	-58.075
117	-58.075
117.1	-58.136
117.201	-58.1055
117.301	-58.0444
117.4	-58.1055
117.5	-58.136
117.6	-58.1055
117.701	-58.197
117.801	-58.0139
117.9	-58.197
118	-58.1055
118.1	-57.9834
118.201	-58.136
118.301	-58.1055
118.4	-58.075
118.5	-58.1665
118.6	-58.136
118.701	-58.1055
118.801	-58.197
118.9	-58.075
119	-58.1055
119.1	-58.136
119.201	-58.0139
119.301	-58.1665
119.4	-58.0139
119.5	-58.1665
119.6	-58.136
119.701	-58.075
119.801	-58.136
119.9	-58.0444
120	-58.075
120.1	-58.0444
120.201	-58.1665
120.301	-58.1055
120.4	-58.1055
120.5	-58.0444
120.6	-58.075
120.701	-58.075
120.801	-58.1055
120.9	-57.9529
121	-58.136
121.1	-58.0139
121.201	-58.0444
121.301	-58.0139
121.4	-58.0444
121.5	-58.075
121.6	-58.0139
121.701	-58.1055
121.801	-57.9834
121.9	-58.1055
122	-58.0444
122.1	-57.9529
122.201	-58.075
122.301	-57.8613
122.4	-58.136
122.5	-58.0139
122.6	-58.0444
122.701	-58.075
122.801	-58.0139
122.9	-57.9834
123	-58.0139
123.1	-58.1055
123.201	-58.1055
123.301	-58.075
123.4	-58.136
123.5	-58.075
123.6	-58.136
123.701	-58.136
123.801	-58.0444
123.9	-58.197
124	-58.1665
124.1	-58.136
124.201	-58.2886
124.301	-58.0139
124.4	-58.2275
124.5	-58.1665
124.6	-58.1665
124.701	-58.2275
124.801	-58.1665
124.9	-58.197
125	-58.1665
125.1	-58.2581
125.201	-58.075
125.301	-58.2581
125.4	-58.2581
125.5	-58.2581
125.6	-58.1665
125.701	-58.0444
125.801	-58.1055
125.9	-58.1665
126	-58.2581
126.1	-58.2581
126.201	-58.2275
126.301	-58.1665
126.4	-58.075
126.5	-58.1055
126.6	-58.1665
126.701	-58.1665
126.801	-58.2886
126.9	-58.1665
127	-58.0444
127.1	-58.197
127.201	-58.197
127.301	-58.197
127.4	-58.1055
127.5	-58.197
127.6	-58.1665
127.701	-58.2275
127.801	-58.1665
127.9	-58.136
128	-58.2275
128.1	-58.1055
128.201	-58.197
128.301	-58.136
128.4	-58.1055
128.5	-58.136
128.6	-58.1665
128.701	-58.197
128.801	-58.136
128.9	-58.2275
129	-58.075
129.1	-58.197
129.201	-58.136
129.301	-58.2581
129.4	-58.136
129.5	-58.075
129.6	-58.3496
129.701	-58.136
129.801	-58.2581
129.9	-58.2275
130	-58.2581
130.1	-58.2886
130.201	-58.1665
130.301	-58.2275
130.4	-58.2275
130.5	-58.136
130.6	-58.197
130.701	-58.3496
130.801	-58.2886
130.9	-58.2581
131	-58.2886
131.1	-58.1665
131.201	-58.2886
131.301	-58.3191
131.4	-58.2886
131.5	-58.3191
131.6	-58.2886
131.701	-58.2581
131.801	-58.3496
131.9	-58.2581
132	-58.3496
132.1	-58.2275
132.201	-58.4106
132.301	-58.2581
132.4	-58.3191
132.5	-58.3496
132.6	-58.3191
132.701	-58.4106
132.801	-58.2886
132.9	-58.3496
133	-58.3191
133.1	-58.197
133.201	-58.2886
133.301	-58.197
133.4	-58.3191
133.5	-58.197
133.6	-58.2275
133.701	-58.2275
133.801	-58.2275
133.9	-58.1665
134	-58.2275
134.1	-58.1055
134.201	-58.2275
134.301	-58.1665
134.4	-58.1665
134.5	-58.2581
134.6	-58.136
134.701	-58.2275
134.801	-58.197
134.9	-58.1665
135	-58.1665
135.1	-58.136
135.201	-58.1665
135.301	-58.1055
135.4	-58.197
135.5	-58.2275
135.6	-58.2886
135.701	-58.136
135.801	-58.2581
135.9	-58.1055
136	-58.197
136.1	-58.2275
136.201	-58.1665
136.301	-58.2581
136.4	-58.197
136.5	-58.2275
136.6	-58.197
136.701	-58.2275
136.801	-58.1665
136.9	-58.2886
137	-58.197
137.1	-58.2275
137.201	-58.2886
137.301	-58.197
137.4	-58.3801
137.5	-58.2886
137.6	-58.2275
137.701	-58.2275
137.801	-58.2275
137.9	-58.1665
138	-58.3191
138.1	-58.2581
138.201	-58.2581
138.301	-58.3496
138.4	-58.197
138.5	-58.2886
138.6	-58.2886
138.701	-58.2275
138.801	-58.3191
138.9	-58.2581
139	-58.2275
139.1	-58.2581
139.201	-58.2581
139.301	-58.197
139.4	-58.3191
139.5	-58.136
139.6	-58.3496
139.701	-58.197
139.801	-58.2275
139.9	-58.2581
140	-58.136
140.1	-58.3801
140.201	-58.197
140.301	-58.2275
140.4	-58.197
140.5	-58.2581
140.6	-58.1665
140.701	-58.136
140.801	-58.2886
140.9	-58.136
141	-58.2581
141.1	-58.1055
141.201	-58.2275
141.301	-58.2886
141.4	-58.2581
141.5	-58.1055
141.6	-58.197
141.701	-58.136
141.801	-58.1665
141.9	-58.1665
142	-58.1665
142.1	-58.0444
142.201	-58.1665
142.301	-58.136
142.4	-58.1665
142.5	-58.2275
142.6	-58.1055
142.701	-58.2275
142.801	-58.136
142.9	-58.1665
143	-58.2581
143.1	-58.1665
143.201	-58.2581
143.301	-58.2275
143.4	-58.2275
143.5	-58.197
143.6	-58.2581
143.701	-58.2886
143.801	-58.2886
143.9	-58.3191
144	-58.2886
144.1	-58.2886
144.201	-58.3191
144.301	-58.2886
144.4	-58.2275
144.5	-58.3191
144.6	-58.2275
144.701	-58.2886
144.801	-58.4412
144.9	-58.2886
145	-58.4412
145.1	-58.3801
145.201	-58.2886
145.301	-58.3801
145.4	-58.3496
145.5	-58.1665
145.6	-58.2886
145.701	-58.3496
145.801	-58.3496
145.9	-58.4717
146	-58.2886
146.1	-58.4106
146.201	-58.2581
146.301	-58.197
146.4	-58.3191
146.5	-58.3191
146.6	-58.4106
146.701	-58.3801
146.801	-58.3191
146.9	-58.2275
147	-58.3191
147.1	-58.3191
147.201	-58.3496
147.301	-58.2275
147.4	-58.2581
147.5	-58.3801
147.6	-58.3191
147.701	-58.2581
147.801	-58.3191
147.9	-58.3191
148	-58.2886
148.1	-58.3496
148.201	-58.2275
148.301	-58.3191
148.4	-58.3496
148.5	-58.197
148.6	-58.3801
148.701	-58.2886
148.801	-58.2581
148.9	-58.3801
149	-58.2886
149.1	-58.2886
149.201	-58.3496
149.301	-58.2886
149.4	-58.2886
149.5	-58.4106
149.6	-58.3801
149.701	-58.2886
149.801	-58.2886
149.9	-58.4717
150	-58.2886
150.1	-58.3801
150.201	-58.3496
150.301	-58.4106
150.4	-58.4412
150.5	-58.3191
150.6	-58.4717
150.701	-58.3496
150.801	-58.4412
150.9	-58.3801
151	-58.3496
151.1	-58.3801
151.201	-58.3801
151.301	-58.5022
151.4	-58.2886
151.5	-58.4412
151.6	-58.3801
151.701	-58.3801
151.801	-58.3801
151.9	-58.3496
152	-58.4106
152.1	-58.4106
152.201	-58.5327
152.301	-58.4412
152.4	-58.4717
152.5	-58.4412
152.6	-58.4412
152.701	-58.4412
152.801	-58.4412
152.9	-58.3496
153	-58.5022
153.1	-58.3496
153.201	-58.4106
153.301	-58.4412
153.4	-58.3191
153.5	-58.4717
153.6	-58.3191
153.701	-58.3801
153.801	-58.3496
153.9	-58.2886
154	-58.3801
154.1	-58.3191
154.201	-58.3801
154.301	-58.3191
154.4	-58.3496
154.5	-58.2886
154.6	-58.3496
154.701	-58.2886
154.801	-58.3496
154.9	-58.2275
155	-58.3801
155.1	-58.3801
155.201	-58.2275
155.301	-58.3801
155.4	-58.2886
155.5	-58.3496
155.6	-58.2886
155.701	-58.3191
155.801	-58.3496
155.9	-58.3191
156	-58.3191
156.1	-58.3801
156.201	-58.3191
156.301	-58.2886
156.4	-58.3801
156.5	-58.2886
156.6	-58.3801
156.701	-58.3801
156.801	-58.3496
156.9	-58.4717
157	-58.3801
157.1	-58.3801
157.201	-58.3496
157.301	-58.4106
157.4	-58.3801
157.5	-58.4106
157.6	-58.3191
157.701	-58.2886
157.801	-58.4412
157.9	-58.3191
158	-58.3801
158.1	-58.3496
158.201	-58.2886
158.301	-58.3801
158.4	-58.3496
158.5	-58.3191
158.6	-58.4106
158.701	-58.4412
158.801	-58.3496
158.9	-58.3496
159	-58.3496
159.1	-58.3801
159.201	-58.4106
159.301	-58.4106
159.4	-58.2886
159.5	-58.3801
159.6	-58.2886
159.701	-58.3801
159.801	-58.3191
159.9	-58.4412
160	-58.2886
160.1	-58.3496
160.201	-58.3801
160.301	-58.2581
160.4	-58.3191
160.5	-58.2275
160.6	-58.4106
160.701	-58.2886
160.801	-58.2886
160.9	-58.3496
161	-58.2886
161.1	-58.3496
161.201	-58.2275
161.301	-58.3801
161.4	-58.2275
161.5	-58.2886
161.6	-58.4106
161.701	-58.2581
161.801	-58.3496
161.9	-58.2275
162	-58.2581
162.1	-58.197
162.201	-58.1665
162.301	-58.1665
162.4	-58.1665
162.5	-58.3496
162.6	-58.2275
162.701	-58.3496
162.801	-58.2581
162.9	-58.2275
163	-58.3191
163.1	-58.2275
163.201	-58.2581
163.301	-58.4106
163.4	-58.3191
163.5	-58.3496
163.6	-58.4106
163.701	-58.3191
163.801	-58.4412
163.9	-58.3191
164	-58.4412
164.1	-58.3801
164.201	-58.3801
164.301	-58.4412
164.4	-58.3496
164.5	-58.5327
164.6	-58.4106
164.701	-58.4412
164.801	-58.4717
164.9	-58.3496
165	-58.3191
165.1	-58.4412
165.201	-58.4412
165.301	-58.5022
165.4	-58.4717
165.5	-58.3191
165.6	-58.4412
165.701	-58.3191
165.801	-58.4412
165.9	-58.5022
166	-58.3496
166.1	-58.4412
166.201	-58.4412
166.301	-58.3801
166.4	-58.4717
166.5	-58.5327
166.6	-58.3191
166.701	-58.4717
166.801	-58.3191
166.9	-58.3191
167	-58.3496
167.1	-58.3191
167.201	-58.4106
167.301	-58.3801
167.4	-58.3801
167.5	-58.4106
167.6	-58.4106
167.701	-58.2886
167.801	-58.5022
167.9	-58.3496
168	-58.2275
168.1	-58.4717
168.201	-58.3801
168.301	-58.3496
168.4	-58.4106
168.5	-58.4412
168.6	-58.3801
168.701	-58.4717
168.801	-58.2886
168.9	-58.4412
169	-58.3801
169.1	-58.3496
169.201	-58.4717
169.301	-58.2886
169.4	-58.4412
169.5	-58.3801
169.6	-58.4412
169.701	-58.3496
169.801	-58.3801
169.9	-58.5632
170	-58.2275
170.1	-58.4717
170.201	-58.5022
170.301	-58.3801
170.4	-58.4412
170.5	-58.4412
170.6	-58.4717
170.701	-58.4717
170.801	-58.4412
170.9	-58.3801
171	-58.4412
171.1	-58.4106
171.201	-58.4412
171.301	-58.4412
171.4	-58.5632
171.5	-58.5327
171.6	-58.5327
171.701	-58.3191
171.801	-58.5022
171.9	-58.5022
172	-58.4412
172.1	-58.5938
172.201	-58.5022
172.301	-58.5632
172.4	-58.4412
172.5	-58.5022
172.6	-58.4106
172.701	-58.5022
172.801	-58.4717
172.9	-58.4106
173	-58.5632
173.1	-58.4106
173.201	-58.4717
173.301	-58.4717
173.4	-58.3801
173.5	-58.4106
173.6	-58.4412
173.701	-58.3801
173.801	-58.4106
173.9	-58.4106
174	-58.3801
174.1	-58.4412
174.201	-58.2886
174.301	-58.3496
174.4	-58.3496
174.5	-58.3191
174.6	-58.3801
174.701	-58.2581
174.801	-58.3801
174.9	-58.3496
175	-58.4106
175.1	-58.3801
175.201	-58.3801
175.301	-58.3496
175.4	-58.2886
175.5	-58.2886
175.6	-58.4106
175.701	-58.3496
175.801	-58.3496
175.9	-58.4412
176	-58.3496
176.1	-58.4106
176.201	-58.3801
176.301	-58.3496
176.4	-58.4717
176.5	-58.4106
176.6	-58.3496
176.701	-58.4412
176.801	-58.4106
176.9	-58.3191
177	-58.4412
177.1	-58.3496
177.201	-58.4106
177.301	-58.5022
177.4	-58.3496
177.5	-58.3801
177.6	-58.3496
177.701	-58.3496
177.801	-58.4106
177.9	-58.5022
178	-58.2581
178.1	-58.4412
178.201	-58.4106
178.301	-58.3801
178.4	-58.4412
178.5	-58.3801
178.6	-58.3496
178.701	-58.4106
178.801	-58.4106
178.9	-58.3496
179	-58.5022
179.1	-58.3496
179.201	-58.4106
179.301	-58.3801
179.4	-58.3191
179.5	-58.4412
179.6	-58.3496
179.701	-58.4412
179.801	-58.2886
179.9	-58.4106
180	-58.3496
180.1	-58.2886
180.201	-58.4717
180.301	-58.2886
180.4	-58.4106
180.5	-58.3191
180.6	-58.4106
180.701	-58.3191
180.801	-58.3496
180.9	-58.3801
181	-58.2581
181.1	-58.3496
181.201	-58.3191
181.301	-58.4106
181.4	-58.2886
181.5	-58.3191
181.6	-58.3496
181.701	-58.2581
181.801	-58.3191
181.9	-58.3191
182	-58.2275
182.1	-58.2886
182.201	-58.2275
182.301	-58.2275
182.4	-58.2581
182.5	-58.2275
182.6	-58.3496
182.701	-58.2275
182.801	-58.3496
182.9	-58.197
183	-58.2581
183.1	-58.2886
183.201	-58.197
183.301	-58.4412
183.4	-58.3496
183.5	-58.3191
183.6	-58.4106
183.701	-58.3191
183.801	-58.4106
183.9	-58.4412
184	-58.4106
184.1	-58.4106
184.201	-58.4412
184.301	-58.3801
184.4	-58.4717
184.5	-58.3496
184.6	-58.5022
184.701	-58.4412
184.801	-58.3801
184.9	-58.4106
185	-58.4106
185.1	-58.4717
185.201	-58.3496
185.301	-58.5327
185.4	-58.4717
185.5	-58.3191
185.6	-58.3801
185.701	-58.4106
185.801	-58.197
185.9	-58.4106
186	-58.3801
186.1	-58.2581
186.201	-58.4412
186.301	-58.3191
186.4	-58.4106
186.5	-58.4106
186.6	-58.3191
186.701	-58.4106
186.801	-58.5022
186.9	-58.3191
187	-58.3496
187.1	-58.5022
187.201	-58.3496
187.301	-58.4717
187.4	-58.3801
187.5	-58.3191
187.6	-58.4106
187.701	-58.3191
187.801	-58.3801
187.9	-58.4106
188	-58.3801
188.1	-58.3496
188.201	-58.4717
188.301	-58.2886
188.4	-58.3496
188.5	-58.4106
188.6	-58.3496
188.701	-58.3801
188.801	-58.4106
188.9	-58.4106
189	-58.3801
189.1	-58.4106
189.201	-58.2886
189.301	-58.4717
189.4	-58.3191
189.5	-58.4412
189.6	-58.3801
189.701	-58.3801
189.801	-58.4106
189.9	-58.3496
190	-58.5632
190.1	-58.2886
190.201	-58.4412
190.301	-58.3801
190.4	-58.4412
190.5	-58.4106
190.6	-58.3801
190.701	-58.6243
190.801	-58.3801
190.9	-58.4717
191	-58.4412
191.1	-58.4412
191.201	-58.5327
191.301	-58.4412
191.4	-58.4717
191.5	-58.4412
191.6	-58.5022
191.701	-58.4106
191.801	-58.4717
191.9	-58.5327
192	-58.4106
192.1	-58.5938
192.201	-58.5327
192.301	-58.5327
192.4	-58.5327
192.5	-58.4106
192.6	-58.5022
192.701	-58.5327
192.801	-58.5022
192.9	-58.5938
193	-58.4106
193.1	-58.4717
193.201	-58.4412
193.301	-58.5022
193.4	-58.4717
193.5	-58.4106
193.6	-58.4717
193.701	-58.4106
193.801	-58.3801
193.9	-58.3801
194	-58.4106
194.1	-58.4106
194.201	-58.3801
194.301	-58.3191
194.4	-58.3801
194.5	-58.2886
194.6	-58.3496
194.701	-58.4412
194.801	-58.2275
194.9	-58.3801
195	-58.4106
195.1	-58.3496
195.201	-58.3191
195.301	-58.3191
195.4	-58.4412
195.5	-58.4412
195.6	-58.4106
195.701	-58.4106
195.801	-58.3801
195.9	-58.3191
196	-58.3496
196.1	-58.197
196.201	-58.3496
196.301	-58.4717
196.4	-58.3801
196.5	-58.4717
196.6	-58.3496
196.701	-58.4412
196.801	-58.4412
196.9	-58.3801
197	-58.3801
197.1	-58.4412
197.201	-58.3496
197.301	-58.3801
197.4	-58.4106
197.5	-58.3191
197.6	-58.4717
197.701	-58.4412
197.801	-58.3496
197.9	-58.3801
198	-58.4106
198.1	-58.4106
198.201	-58.4412
198.301	-58.4106
198.4	-58.3496
198.5	-58.5022
198.6	-58.3496
198.701	-58.4412
198.801	-58.4412
198.9	-58.3191
199	-58.4106
199.1	-58.4106
199.201	-58.3801
199.301	-58.4106
199.4	-58.3496
199.5	-58.4106
199.6	-58.4412
[truncated: 98,004 more rows]
