# Supplementary material for: The cation channel mechanisms of subthreshold inward depolarizing currents in the mice VTA dopaminergic neurons and their roles in the chronic-stress-induced depression-like behavior
Source: eLife. 2024 Dec 6;12:RP88319. doi: 10.7554/eLife.88319 (PMC11623934; doi:10.7554/eLife.88319)
Supplement: Figure 5—source data 7. [file elife-88319-fig5-data7.xlsx]

## Sheet: Figure 5 H i
Time (min)	Firing rate (Hz)
0	0.27778
0.18	0.37037
0.36	0.27778
0.54	0.18519
0.72	0.18519
0.9	0.27778
1.08	0.37037
1.26	0
1.44	0.27778
1.62	0.18519
1.8	0.37037
1.98	0.46296
2.16	0.46296
2.34	0.64815
2.52	0.18519
2.7	0.46296
2.88	0.09259
3.06	0.27778
3.24	0.37037
3.42	0.37037
3.6	0.46296
3.78	0.55556
3.96	0.27778
4.14	0.37037
4.32	0.37037
4.5	0.27778
4.68	0.18519
4.86	0.18519
5.04	0.27778
5.22	0.37037
5.4	0.27778
5.58	0.27778
5.76	0
5.94	0.27778
6.12	0.09259
6.3	0.37037
6.48	0.18519
6.66	0.09259
6.84	0.46296
7.02	0.09259
7.2	0.27778
7.38	0.37037
7.56	0.37037
7.74	0.37037
7.92	0.27778
8.1	0.18519
8.28	0.27778
8.46	0
8.64	0.27778
8.82	0.18519
9	0.18519
9.18	0.18519
9.36	0.09259
9.54	0.37037
9.72	0.18519
9.9	0.37037
10.08	0
10.26	0.37037
10.44	0.09259
10.62	0.37037
10.8	0.37037
10.98	0.09259
11.16	0.27778
11.34	0.18519
11.52	0.37037
11.7	0.18519
11.88	0.18519
12.06	0.37037
12.24	0.18519
12.42	0.18519
12.6	0.37037
12.78	0.18519
12.96	0.27778
13.14	0.37037
13.32	0.27778
13.5	0.18519
13.68	0.46296
13.86	0.09259
14.04	0.18519
14.22	0.37037
14.4	0.18519
14.58	0.18519
14.76	0.18519
14.94	0.09259
15.12	0.37037
15.3	0.18519
15.48	0.27778
15.66	0.18519
15.84	0.18519
16.02	0.55556
16.2	0.27778
16.38	0.27778
16.56	0.27778
16.74	0.18519
16.92	0.27778
17.1	0.37037
17.28	0.27778
17.46	0.18519
17.64	0.09259
17.82	0.18519

## Sheet: Figure 5 H ii
acsf	LA	acsf
0.33	0.24	0.33
0.63	0.75	0.78
0.29	0.29	0.33
0.37	0.3	0.23
0.48	0.44	0.41
0.53	0.53	0.41
0.27	0.33	0.2
0.53	0.55	0.7
