# Supplementary material for: The cation channel mechanisms of subthreshold inward depolarizing currents in the mice VTA dopaminergic neurons and their roles in the chronic-stress-induced depression-like behavior
Source: eLife. 2024 Dec 6;12:RP88319. doi: 10.7554/eLife.88319 (PMC11623934; doi:10.7554/eLife.88319)
Supplement: Figure 6—figure supplement 1—source data 1. [file elife-88319-fig6-figsupp1-data1.xlsx]

## Sheet:  A
CON	CMUS
3.9	1.9
4.7	3.1
4.8	3.6
5.6	2.1
5.2	1.8
5.5	3.8
4.3	3
4.1	1.1
5	1.7
5.2	3.7

## Sheet:  B
Con	CMUS
3370.12	2733.53
2595.95	1315.53
2986.96	1609.97
4126.11	2564.3
3666.02	2341.54
3812.99	1689.29
3805.19	1663.67
3147.17	2631.24
3208.57	2775.57
4105.79	3209.53

## Sheet:  C
Con	CMUS
28.19	15.81
51.56	2.56
36.44	13.75
34.56	25.06
25.75	29.25
42.69	3.25
32.75	22.87
39.31	9.37
28.12	29.75
39.81	18.5

## Sheet:  D
CON	CMUS
5.64667	1.79333
5.83333	1.23
5.04	1.04333
7.60333	2.23
9.52	1.06333
9.39667	1.75
23.08	4.68667
15.3533	4.18667
11.9567	4.31333
16.4367	3.64667

## Sheet:  E
CON	CMUS
85.9567	91.5833
84.8333	88.3767
79.3967	87.6467
79.23	84.1667
74.3533	91.4567
76.9567	88.1033
68.7933	68.1033
56.4167	81.21
75.6667	88.6033
58.6467	82.96

## Sheet:  F
CON	CMUS
129	182
158	198
149	160
131	164
164	178
159	199
150	187
146	170
130	146
145	202

## Sheet:  G
CON	CMUS
250	245
242	289
283	247
258	255
267	268
270	270
277	283
252	249
255	263
268	274
