# Supplementary material for: The cation channel mechanisms of subthreshold inward depolarizing currents in the mice VTA dopaminergic neurons and their roles in the chronic-stress-induced depression-like behavior
Source: eLife. 2024 Dec 6;12:RP88319. doi: 10.7554/eLife.88319 (PMC11623934; doi:10.7554/eLife.88319)
Supplement: Figure 6—figure supplement 2—source data 1. [file elife-88319-fig6-figsupp2-data1.xlsx]

## Sheet:  A 
CON	CMUS
2.9	1
2.6	0.1
3.1	1.9
2.9	1.1
1.8	1.7
3.2	2
3.6	1.6
2.5	2.3
3.2	2.7
2.2	1.6

## Sheet: B 
CON	CMUS
78.3333	56.6667
80.597	79.1667
92.4242	76.4045
90.4762	65.3846
85.3448	64.2857
85.5072	78.6885
84.9057	70.9677
85.0746	84.0909
84.127	77.9412
89.7959	78.3784

## Sheet:  C 
CON	CMUS
3246.94	2314.4
2777.37	2101.17
3233.49	1894.33
3032.65	2683.89
3448.39	1756.27
2829.17	1635.53
3098.15	1876.49
3478.24	2316.27
3432.17	2744.54
3136.78	3055.08

## Sheet:  D 
CON	CMUS
62.13	28.81
53.88	21.31
26.62	26.94
30.25	24.5
43	15.56
93.44	6.31
60.81	36.5
36	30.69
38.56	30.75
29.12	26.94

## Sheet:  E 
CON	CMUS
3.06333	5.43667
5	0.96
7.96	0.603333
6.79	0.583333
7.31333	0.186667
7.02	1.48
24.3133	4.46
12.7933	3.93667
14	3.60333
15	3.54

## Sheet: F 
CON	CMUS
91.3333	84.6867
84.6033	89.52
71.3133	89.73
76	94.8733
65.1667	93.5833
82.6467	90.71
61.9367	73.1467
74.5	79.27
70.8133	86.04
73.1667	77.6467

## Sheet:  G 
CON	CMUS
245	252
258	249
269	263
279	265
255	251
246	243
259	266
268	273
277	254
269	271

## Sheet:  H 
CON	CMUS
158	200
146	189
125	176
137	150
119	149
127	178
130	182
147	159
150	170
143	182

## Sheet:  I
CON	CMUS
132	173
146	198
160	210
147	188
140	164
135	186
128	182
149	143
159	189
136	167
