# Supplementary material for: The cation channel mechanisms of subthreshold inward depolarizing currents in the mice VTA dopaminergic neurons and their roles in the chronic-stress-induced depression-like behavior
Source: eLife. 2024 Dec 6;12:RP88319. doi: 10.7554/eLife.88319 (PMC11623934; doi:10.7554/eLife.88319)
Supplement: Figure 6—figure supplement 4—source data 1. [file elife-88319-fig6-figsupp4-data1.xlsx]

## Sheet: B
CON	CRS
4.3	2.8
5	2.7
4.4	2.1
3.8	3.3
5.2	2.9
5	2.6
4.8	4.1
4.2	3.1
3	2.5
4	2.1

## Sheet:  C
CON	CRS
90.9091	76.4706
80	84.3137
82.2581	74.5455
86.1111	66.129
84.2593	76.8293
86.1539	60
88.961	63.6364
89.4737	79.1045
91.6667	77.5
78.8461	68.8525

## Sheet:  D
CON	CRS
3738	2302.32
3310.81	2489.18
3144.29	2179.98
2996.11	2746.46
3521.9	1968.07
3773.52	1837.06
3204.24	2592.49
3693.34	3014.53
3612.16	3700.12
4134.91	2743.6

## Sheet:  E
CON	CRS
27.5	19.81
60.13	8.06
90.5	31.81
38.19	23.31
44.69	8.38
40.88	16.94
29.5	29.12
41.19	20.5
28.12	17.75
37.62	30

## Sheet:  F
CON	CRS
2.95667	5.48
5.06333	3.25
5.35333	0.146667
7.83333	0.853333
7.68667	3.19
8.37333	0.543333
18.7067	4.89667
14.5433	3.64667
13.96	3.54
29.6667	3.54

## Sheet: G
CON	CRS
79.3133	72.8333
75.75	90.7933
81.9567	93.0833
70.5633	91.0633
64.5	86.21
57.5433	99.3533
57.96	84.4367
64.1667	84.46
69.1233	81.5
44.9567	86.9367

## Sheet:  H
CON	CRS
122	138
100	129
127	119
105	168
109	149
129	137
109	112
106	156
79	133
120	125

## Sheet: I
CON	CRS
295	289
284	280
275	279
268	266
259	259
265	249
273	282
279	270
249	271
250	265
