# Supplementary material for: The cation channel mechanisms of subthreshold inward depolarizing currents in the mice VTA dopaminergic neurons and their roles in the chronic-stress-induced depression-like behavior
Source: eLife. 2024 Dec 6;12:RP88319. doi: 10.7554/eLife.88319 (PMC11623934; doi:10.7554/eLife.88319)
Supplement: Figure 6—source data 1. [file elife-88319-fig6-data1.xlsx]

## Sheet: Sheet1
SPT			TST
CON	CMUS		CON	CMUS
80.4348	49.2958		127	138
92.4528	67.7419		105	156
82.6087	61.6667		109	133
87	71.6667		89	168
84.9057	76.7442		109	149
88.4058	80.303		106	137
85.9375	84.9057		88	153
90	81.8182		118	131
88.3721	76.7677		93	117
80.7229	79.4118		120	145
