# Supplementary material for: The cation channel mechanisms of subthreshold inward depolarizing currents in the mice VTA dopaminergic neurons and their roles in the chronic-stress-induced depression-like behavior
Source: eLife. 2024 Dec 6;12:RP88319. doi: 10.7554/eLife.88319 (PMC11623934; doi:10.7554/eLife.88319)
Supplement: Figure 6—source data 2. [file elife-88319-fig6-data2.xlsx]

## Sheet: Figure 6 C i
Example trace
Con
Time(ms)	voltage(mv)
0	-0.05188
0.0625	-0.05188
0.10938	-0.05798
0.15625	-0.06409
0.20313	-0.05493
0.25	-0.05188
0.3125	-0.05188
0.35938	-0.04578
0.40625	-0.02441
0.45313	-0.04883
0.5	-0.03052
0.5625	-0.03662
0.60938	-0.02441
0.65625	-0.01831
0.70313	-0.03357
0.75	-0.03357
0.8125	-0.05493
0.85938	-0.04883
0.90625	-0.05798
0.95313	-0.05798
1	-0.05493
1.0625	-0.05493
1.10938	-0.06104
1.15625	-0.05798
1.20313	-0.05188
1.25	-0.05798
1.3125	-0.06409
1.35938	-0.06714
1.40625	-0.05798
1.45313	-0.04883
1.5	-0.03967
1.5625	-0.04578
1.60938	-0.05798
1.65625	-0.05493
1.70313	-0.05493
1.75	-0.03357
1.8125	-0.04272
1.85938	-0.05188
1.90625	-0.07629
1.95313	-0.07019
2	-0.07019
2.0625	-0.06409
2.10938	-0.07324
2.15625	-0.0824
2.20313	-0.06714
2.25	-0.07324
2.3125	-0.05493
2.35938	-0.05798
2.40625	-0.05493
2.45313	-0.05188
2.5	-0.05188
2.5625	-0.05188
2.60938	-0.05188
2.65625	-0.05188
2.70313	-0.06714
2.75	-0.07629
2.8125	-0.07629
2.85938	-0.05493
2.90625	-0.05493
2.95313	-0.05798
3	-0.06409
3.0625	-0.07324
3.10938	-0.05798
3.15625	-0.05188
3.20313	-0.05798
3.25	-0.05798
3.3125	-0.05188
3.35938	-0.05493
3.40625	-0.05188
3.45313	-0.05493
3.5	-0.06714
3.5625	-0.05798
3.60938	-0.05493
3.65625	-0.06714
3.70313	-0.06409
3.75	-0.03967
3.8125	-0.04578
3.85938	-0.04578
3.90625	-0.06409
3.95313	-0.05493
4	-0.04272
4.0625	-0.06409
4.10938	-0.07019
4.15625	-0.07629
4.20313	-0.05798
4.25	-0.06409
4.3125	-0.07019
4.35938	-0.06714
4.40625	-0.06409
4.45313	-0.05798
4.5	-0.04883
4.5625	-0.04883
4.60938	-0.05493
4.65625	-0.04578
4.70313	-0.05798
4.75	-0.06104
4.8125	-0.06714
4.85938	-0.06714
4.90625	-0.06409
4.95313	-0.07019
5	-0.07324
5.0625	-0.0824
5.10938	-0.06409
5.15625	-0.06714
5.20313	-0.05188
5.25	-0.05798
5.3125	-0.06104
5.35938	-0.03357
5.40625	-0.03357
5.45313	-0.03967
5.5	-0.04578
5.5625	-0.03052
5.60938	-0.03357
5.65625	-0.03967
5.70313	-0.05798
5.75	-0.04883
5.8125	-0.03052
5.85938	-0.04272
5.90625	-0.04272
5.95313	-0.05188
6	-0.01831
6.0625	-0.01526
6.10938	-0.00916
6.15625	-0.02136
6.20313	-0.00916
6.25	-0.01221
6.3125	-0.02136
6.35938	-0.02136
6.40625	-0.02747
6.45313	0.00916
6.5	0.00916
6.5625	0.0061
6.60938	0.00305
6.65625	0.02441
6.70313	0.01831
6.75	0.00916
6.8125	-0.01526
6.85938	-0.02441
6.90625	0
6.95313	-0.00916
7	-0.00305
7.0625	-0.01831
7.10938	-0.00916
7.15625	-0.00305
7.20313	0
7.25	-0.00305
7.3125	-0.00305
7.35938	0.01526
7.40625	0.00305
7.45313	0.0061
7.5	-0.0061
7.5625	0.00916
7.60938	0.00305
7.65625	-0.0061
7.70313	-0.01831
7.75	-0.01221
7.8125	0.00305
7.85938	-0.0061
7.90625	-0.02441
7.95313	-0.04578
8	-0.03052
8.0625	-0.03662
8.10938	-0.03967
8.15625	-0.05798
8.20313	-0.06714
8.25	-0.05798
8.3125	-0.05798
8.35938	-0.06409
8.40625	-0.07324
8.45313	-0.06409
8.5	-0.07324
8.5625	-0.07324
8.60938	-0.0824
8.65625	-0.0885
8.70313	-0.07935
8.75	-0.0885
8.8125	-0.10071
8.85938	-0.09766
8.90625	-0.0946
8.95313	-0.0885
9	-0.09766
9.0625	-0.10986
9.10938	-0.11292
9.15625	-0.10376
9.20313	-0.10071
9.25	-0.10986
9.3125	-0.12207
9.35938	-0.11292
9.40625	-0.12207
9.45313	-0.11597
9.5	-0.10681
9.5625	-0.10071
9.60938	-0.10681
9.65625	-0.11292
9.70313	-0.11902
9.75	-0.11597
9.8125	-0.10681
9.85938	-0.12207
9.90625	-0.12512
9.95313	-0.11902
10	-0.11597
10.0625	-0.09766
10.1094	-0.10681
10.1562	-0.11292
10.2031	-0.10986
10.25	-0.10071
10.3125	-0.09155
10.3594	-0.09155
10.4062	-0.10376
10.4531	-0.12512
10.5	-0.11597
10.5625	-0.11597
10.6094	-0.10681
10.6562	-0.10986
10.7031	-0.0946
10.75	-0.10681
10.8125	-0.10986
10.8594	-0.11902
10.9062	-0.10986
10.9531	-0.11292
11	-0.11902
11.0625	-0.12207
11.1094	-0.14343
11.1562	-0.11902
11.2031	-0.12207
11.25	-0.13428
11.3125	-0.14343
11.3594	-0.14954
11.4062	-0.14648
11.4531	-0.13428
11.5	-0.13733
11.5625	-0.14038
11.6094	-0.12512
11.6562	-0.13733
11.7031	-0.13123
11.75	-0.13428
11.8125	-0.12512
11.8594	-0.12817
11.9062	-0.12207
11.9531	-0.11597
12	-0.11292
12.0625	-0.0885
12.1094	-0.0946
12.1562	-0.10376
12.2031	-0.11292
12.25	-0.09155
12.3125	-0.0824
12.3594	-0.08545
12.4062	-0.09766
12.4531	-0.0946
12.5	-0.07935
12.5625	-0.0824
12.6094	-0.08545
12.6562	-0.0946
12.7031	-0.08545
12.75	-0.07935
12.8125	-0.08545
12.8594	-0.09155
12.9062	-0.10376
12.9531	-0.0885
13	-0.09155
13.0625	-0.10681
13.1094	-0.10071
13.1562	-0.0824
13.2031	-0.07629
13.25	-0.08545
13.3125	-0.0946
13.3594	-0.0885
13.4062	-0.07019
13.4531	-0.07935
13.5	-0.07629
13.5625	-0.08545
13.6094	-0.07324
13.6562	-0.07019
13.7031	-0.06714
13.75	-0.06714
13.8125	-0.06714
13.8594	-0.05798
13.9062	-0.06409
13.9531	-0.06714
14	-0.07019
14.0625	-0.06714
14.1094	-0.06104
14.1562	-0.06409
14.2031	-0.07324
14.25	-0.07324
14.3125	-0.07629
14.3594	-0.07019
14.4062	-0.07324
14.4531	-0.08545
14.5	-0.07019
14.5625	-0.07324
14.6094	-0.07324
14.6562	-0.07629
14.7031	-0.07629
14.75	-0.05493
14.8125	-0.06409
14.8594	-0.0824
14.9062	-0.08545
14.9531	-0.07019
15	-0.06714
15.0625	-0.07629
15.1094	-0.0885
15.1562	-0.0946
15.2031	-0.08545
15.25	-0.0946
15.3125	-0.10376
15.3594	-0.11292
15.4062	-0.0946
15.4531	-0.10376
15.5	-0.10681
15.5625	-0.11292
15.6094	-0.09766
15.6562	-0.09155
15.7031	-0.09766
15.75	-0.09766
15.8125	-0.10681
15.8594	-0.0824
15.9062	-0.10071
15.9531	-0.12512
16	-0.12817
16.0625	-0.11292
16.1094	-0.10376
16.1562	-0.10376
16.2031	-0.11902
16.25	-0.12817
16.3125	-0.10681
16.3594	-0.11597
16.4062	-0.11597
16.4531	-0.11902
16.5	-0.11597
16.5625	-0.10986
16.6094	-0.10376
16.6562	-0.10681
16.7031	-0.10986
16.75	-0.09766
16.8125	-0.12207
16.8594	-0.11902
16.9062	-0.10986
16.9531	-0.0946
17	-0.10681
17.0625	-0.11292
17.1094	-0.12512
17.1562	-0.11292
17.2031	-0.10681
17.25	-0.11902
17.3125	-0.11902
17.3594	-0.13733
17.4062	-0.11902
17.4531	-0.13733
17.5	-0.11902
17.5625	-0.11597
17.6094	-0.11597
17.6562	-0.11902
17.7031	-0.10986
17.75	-0.10681
17.8125	-0.0946
17.8594	-0.09766
17.9062	-0.11292
17.9531	-0.12817
18	-0.12512
18.0625	-0.10986
18.1094	-0.09766
18.1562	-0.10376
18.2031	-0.10376
18.25	-0.08545
18.3125	-0.07324
18.3594	-0.06409
18.4062	-0.07629
18.4531	-0.07935
18.5	-0.0885
18.5625	-0.06104
18.6094	-0.06104
18.6562	-0.05188
18.7031	-0.06104
18.75	-0.04578
18.8125	-0.06409
18.8594	-0.07019
18.9062	-0.06714
18.9531	-0.07019
19	-0.05493
19.0625	-0.06714
19.1094	-0.07019
19.1562	-0.06409
19.2031	-0.03052
19.25	-0.03052
19.3125	-0.03662
19.3594	-0.04883
19.4062	-0.05188
19.4531	-0.03662
19.5	-0.03052
19.5625	-0.03662
19.6094	-0.04578
19.6562	-0.02441
19.7031	-0.02747
19.75	-0.01831
19.8125	-0.01831
19.8594	-0.01526
19.9062	-0.0061
19.9531	-0.00305
20	0.01221
20.0625	0.00916
20.1094	0.00916
20.1562	-0.00305
20.2031	-0.01221
20.25	-0.02747
20.3125	-0.01526
20.3594	-0.01831
20.4062	-0.02747
20.4531	-0.03662
20.5	-0.04578
20.5625	-0.02136
20.6094	-0.02747
20.6562	-0.03357
20.7031	-0.04272
20.75	-0.03967
20.8125	-0.03967
20.8594	-0.03967
20.9062	-0.04578
20.9531	-0.05493
21	-0.03357
21.0625	-0.03967
21.1094	-0.04272
21.1562	-0.05493
21.2031	-0.04578
21.25	-0.05188
21.3125	-0.05493
21.3594	-0.06714
21.4062	-0.06714
21.4531	-0.05798
21.5	-0.07629
21.5625	-0.0824
21.6094	-0.08545
21.6562	-0.07629
21.7031	-0.06409
21.75	-0.06714
21.8125	-0.06714
21.8594	-0.06714
21.9062	-0.05493
21.9531	-0.06409
22	-0.06714
22.0625	-0.0824
22.1094	-0.07324
22.1562	-0.07324
22.2031	-0.09155
22.25	-0.10071
22.3125	-0.11292
22.3594	-0.07935
22.4062	-0.0824
22.4531	-0.08545
22.5	-0.0885
22.5625	-0.07935
22.6094	-0.07629
22.6562	-0.07935
22.7031	-0.0885
22.75	-0.08545
22.8125	-0.06104
22.8594	-0.07019
22.9062	-0.07324
22.9531	-0.07935
23	-0.05493
23.0625	-0.05798
23.1094	-0.06409
23.1562	-0.07324
23.2031	-0.07019
23.25	-0.06104
23.3125	-0.07019
23.3594	-0.06714
23.4062	-0.07324
23.4531	-0.06714
23.5	-0.07019
23.5625	-0.0824
23.6094	-0.09155
23.6562	-0.09155
23.7031	-0.09155
23.75	-0.0885
23.8125	-0.0946
23.8594	-0.10071
23.9062	-0.07019
23.9531	-0.07935
24	-0.07019
24.0625	-0.06714
24.1094	-0.05493
24.1562	-0.04883
24.2031	-0.05493
24.25	-0.06409
24.3125	-0.07019
24.3594	-0.06104
24.4062	-0.07324
24.4531	-0.07019
24.5	-0.07935
24.5625	-0.0824
24.6094	-0.07324
24.6562	-0.06409
24.7031	-0.07324
24.75	-0.07935
24.8125	-0.06714
24.8594	-0.07629
24.9062	-0.07629
24.9531	-0.0885
25	-0.07324
25.0625	-0.06714
25.1094	-0.07324
25.1562	-0.07324
25.2031	-0.07324
25.25	-0.05798
25.3125	-0.07019
25.3594	-0.0824
25.4062	-0.08545
25.4531	-0.07629
25.5	-0.07019
25.5625	-0.06104
25.6094	-0.06104
25.6562	-0.07324
25.7031	-0.06104
25.75	-0.06104
25.8125	-0.05798
25.8594	-0.06409
25.9062	-0.06409
25.9531	-0.06714
26	-0.05493
26.0625	-0.06104
26.1094	-0.05188
26.1562	-0.02747
26.2031	-0.03357
26.25	-0.03662
26.3125	-0.03662
26.3594	-0.01831
26.4062	0.0061
26.4531	0
26.5	-0.01221
26.5625	-0.01221
26.6094	-0.0061
26.6562	0.0061
26.7031	0.00305
26.75	0
26.8125	-0.00305
26.8594	0
26.9062	0.00305
26.9531	0.01831
27	0.01221
27.0625	0.0061
27.1094	0
27.1562	-0.0061
27.2031	0
27.25	0.0061
27.3125	-0.00305
27.3594	-0.01221
27.4062	-0.01221
27.4531	-0.01526
27.5	0.00305
27.5625	-0.01526
27.6094	-0.02136
27.6562	-0.03357
27.7031	-0.02747
27.75	-0.02441
27.8125	-0.02136
27.8594	-0.03662
27.9062	-0.04272
27.9531	-0.03967
28	-0.03967
28.0625	-0.02747
28.1094	-0.03052
28.1562	-0.03052
28.2031	-0.03662
28.25	-0.02747
28.3125	-0.02747
28.3594	-0.02441
28.4062	-0.02441
28.4531	-0.03052
28.5	-0.03967
28.5625	-0.06104
28.6094	-0.04578
28.6562	-0.05798
28.7031	-0.07629
28.75	-0.08545
28.8125	-0.0885
28.8594	-0.07629
28.9062	-0.06409
28.9531	-0.07019
29	-0.08545
29.0625	-0.07935
29.1094	-0.09155
29.1562	-0.0824
29.2031	-0.0946
29.25	-0.10071
29.3125	-0.10376
29.3594	-0.11292
29.4062	-0.11597
29.4531	-0.12512
29.5	-0.11292
29.5625	-0.11597
29.6094	-0.11902
29.6562	-0.12207
29.7031	-0.11292
29.75	-0.10986
29.8125	-0.10986
29.8594	-0.11597
29.9062	-0.12512
29.9531	-0.11597
30	-0.12207
30.0625	-0.12512
30.1094	-0.13123
30.1562	-0.12817
30.2031	-0.13123
30.25	-0.12817
30.3125	-0.12817
30.3594	-0.13428
30.4062	-0.12207
30.4531	-0.12512
30.5	-0.13428
30.5625	-0.12512
30.6094	-0.11902
30.6562	-0.10681
30.7031	-0.10071
30.75	-0.11292
30.8125	-0.11597
30.8594	-0.10681
30.9062	-0.11292
30.9531	-0.11902
31	-0.12207
31.0625	-0.11902
31.1094	-0.11292
31.1562	-0.11902
31.2031	-0.12207
31.25	-0.12817
31.3125	-0.10986
31.3594	-0.10986
31.4062	-0.10681
31.4531	-0.10681
31.5	-0.09766
31.5625	-0.10681
31.6094	-0.10986
31.6562	-0.11292
31.7031	-0.10986
31.75	-0.09766
31.8125	-0.10071
31.8594	-0.10376
31.9062	-0.10681
31.9531	-0.09766
32	-0.10071
32.0625	-0.10681
32.1094	-0.10376
32.1562	-0.10376
32.2031	-0.0946
32.25	-0.10681
32.3125	-0.12207
32.3594	-0.11597
32.4062	-0.0946
32.4531	-0.08545
32.5	-0.07629
32.5625	-0.08545
32.6094	-0.07935
32.6562	-0.05493
32.7031	-0.05798
32.75	-0.04578
32.8125	-0.04883
32.8594	-0.04272
32.9062	-0.04883
32.9531	-0.04883
33	-0.05493
33.0625	-0.05798
33.1094	-0.06104
33.1562	-0.06104
33.2031	-0.05798
33.25	-0.06104
33.3125	-0.03967
33.3594	-0.04578
33.4062	-0.05493
33.4531	-0.06714
33.5	-0.06409
33.5625	-0.05188
33.6094	-0.06409
33.6562	-0.07629
33.7031	-0.08545
33.75	-0.06104
33.8125	-0.07629
33.8594	-0.06104
33.9062	-0.06104
33.9531	-0.06104
34	-0.07019
34.0625	-0.07935
34.1094	-0.07324
34.1562	-0.07324
34.2031	-0.07019
34.25	-0.09766
34.3125	-0.07935
34.3594	-0.07629
34.4062	-0.07324
34.4531	-0.07629
34.5	-0.07629
34.5625	-0.07935
34.6094	-0.0824
34.6562	-0.07629
34.7031	-0.07019
34.75	-0.07629
34.8125	-0.0824
34.8594	-0.0824
34.9062	-0.07019
34.9531	-0.07019
35	-0.07019
35.0625	-0.07019
35.1094	-0.07324
35.1562	-0.0824
35.2031	-0.0824
35.25	-0.07935
35.3125	-0.06714
35.3594	-0.0824
35.4062	-0.08545
35.4531	-0.0885
35.5	-0.0885
35.5625	-0.07629
35.6094	-0.10071
35.6562	-0.10986
35.7031	-0.11902
35.75	-0.11902
35.8125	-0.10986
35.8594	-0.10376
35.9062	-0.12207
35.9531	-0.12512
36	-0.11292
36.0625	-0.11292
36.1094	-0.11597
36.1562	-0.12207
36.2031	-0.12207
36.25	-0.11902
36.3125	-0.10986
36.3594	-0.10071
36.4062	-0.10681
36.4531	-0.10071
36.5	-0.11292
36.5625	-0.11597
36.6094	-0.11902
36.6562	-0.09155
36.7031	-0.09766
36.75	-0.11292
36.8125	-0.11902
36.8594	-0.12512
36.9062	-0.0946
36.9531	-0.10071
37	-0.11597
37.0625	-0.13123
37.1094	-0.12512
37.1562	-0.13733
37.2031	-0.13123
37.25	-0.13123
37.3125	-0.13123
37.3594	-0.11597
37.4062	-0.12207
37.4531	-0.11597
37.5	-0.11292
37.5625	-0.10681
37.6094	-0.11902
37.6562	-0.12817
37.7031	-0.13733
37.75	-0.13123
37.8125	-0.12207
37.8594	-0.12817
37.9062	-0.12817
37.9531	-0.13428
38	-0.10681
38.0625	-0.10376
38.1094	-0.10376
38.1562	-0.10681
38.2031	-0.10681
38.25	-0.10376
38.3125	-0.09766
38.3594	-0.09766
38.4062	-0.09766
38.4531	-0.08545
38.5	-0.09155
38.5625	-0.08545
38.6094	-0.09155
38.6562	-0.0885
38.7031	-0.07629
38.75	-0.0824
38.8125	-0.07629
38.8594	-0.07935
38.9062	-0.05798
38.9531	-0.06409
39	-0.06104
39.0625	-0.06714
39.1094	-0.06409
39.1562	-0.03662
39.2031	-0.03662
39.25	-0.03357
39.3125	-0.03662
39.3594	-0.02747
39.4062	-0.02747
39.4531	-0.02136
39.5	-0.03357
39.5625	-0.03052
39.6094	-0.03967
39.6562	-0.03967
39.7031	-0.04883
39.75	-0.05798
39.8125	-0.03967
39.8594	-0.04883
39.9062	-0.04578
39.9531	-0.04578
40	-0.03967
40.0625	-0.03662
40.1094	-0.03357
40.1562	-0.03357
40.2031	-0.04578
40.25	-0.03357
40.3125	-0.04578
40.3594	-0.04272
40.4062	-0.05188
40.4531	-0.04272
40.5	-0.04272
40.5625	-0.04578
40.6094	-0.04883
40.6562	-0.04272
40.7031	-0.02747
40.75	-0.04272
40.8125	-0.04272
40.8594	-0.04883
40.9062	-0.03967
40.9531	-0.02441
41	-0.02747
41.0625	-0.02441
41.1094	-0.01831
41.1562	-0.01221
41.2031	-0.01526
41.25	-0.01526
41.3125	-0.02747
41.3594	-0.0061
41.4062	-0.01831
41.4531	-0.03357
41.5	-0.04272
41.5625	-0.04578
41.6094	-0.03052
41.6562	-0.04272
41.7031	-0.06409
41.75	-0.06714
41.8125	-0.05493
41.8594	-0.05493
41.9062	-0.05493
41.9531	-0.07324
42	-0.07324
42.0625	-0.05493
42.1094	-0.05188
42.1562	-0.05493
42.2031	-0.07324
42.25	-0.06714
42.3125	-0.06714
42.3594	-0.05493
42.4062	-0.05798
42.4531	-0.05188
42.5	-0.04578
42.5625	-0.05188
42.6094	-0.05493
42.6562	-0.05188
42.7031	-0.04272
42.75	-0.04883
42.8125	-0.05798
42.8594	-0.07629
42.9062	-0.07324
42.9531	-0.07019
43	-0.06104
43.0625	-0.06714
43.1094	-0.0885
43.1562	-0.07629
43.2031	-0.06714
43.25	-0.05798
43.3125	-0.05188
43.3594	-0.06714
43.4062	-0.06409
43.4531	-0.06104
43.5	-0.06104
43.5625	-0.05188
43.6094	-0.05493
43.6562	-0.07629
43.7031	-0.07935
43.75	-0.07629
43.8125	-0.07019
43.8594	-0.07019
43.9062	-0.07935
43.9531	-0.09155
44	-0.0885
44.0625	-0.07324
44.1094	-0.06409
44.1562	-0.06104
44.2031	-0.07019
44.25	-0.07935
44.3125	-0.07019
44.3594	-0.06409
44.4062	-0.05188
44.4531	-0.06714
44.5	-0.06409
44.5625	-0.06714
44.6094	-0.06714
44.6562	-0.06409
44.7031	-0.05188
44.75	-0.05188
44.8125	-0.04883
44.8594	-0.06714
44.9062	-0.07629
44.9531	-0.04578
45	-0.05798
45.0625	-0.07019
45.1094	-0.0824
45.1562	-0.07629
45.2031	-0.06104
45.25	-0.05188
45.3125	-0.06104
45.3594	-0.06104
45.4062	-0.03967
45.4531	-0.04578
45.5	-0.03662
45.5625	-0.05188
45.6094	-0.03662
45.6562	-0.04578
45.7031	-0.05493
45.75	-0.05798
45.8125	-0.05798
45.8594	-0.05188
45.9062	-0.07324
45.9531	-0.08545
46	-0.0946
46.0625	-0.07935
46.1094	-0.07324
46.1562	-0.07935
46.2031	-0.07019
46.25	-0.06409
46.3125	-0.03967
46.3594	-0.03357
46.4062	-0.03967
46.4531	-0.05188
46.5	-0.04578
46.5625	-0.05493
46.6094	-0.04272
46.6562	-0.05188
46.7031	-0.06104
46.75	-0.04272
46.8125	-0.04883
46.8594	-0.03662
46.9062	-0.03662
46.9531	-0.02136
47	-0.01831
47.0625	-0.01831
47.1094	-0.03357
47.1562	-0.02747
47.2031	-0.02136
47.25	-0.02747
47.3125	-0.02747
47.3594	-0.03967
47.4062	-0.03052
47.4531	-0.02747
47.5	-0.03052
47.5625	-0.04272
47.6094	-0.04578
47.6562	-0.04578
47.7031	-0.04272
47.75	-0.04578
47.8125	-0.05188
47.8594	-0.03967
47.9062	-0.03662
47.9531	-0.03967
48	-0.04272
48.0625	-0.04272
48.1094	-0.03357
48.1562	-0.02441
48.2031	-0.02747
48.25	-0.03967
48.3125	-0.02136
48.3594	-0.02747
48.4062	-0.02136
48.4531	-0.03052
48.5	-0.04578
48.5625	-0.03967
48.6094	-0.04883
48.6562	-0.05798
48.7031	-0.06409
48.75	-0.05798
48.8125	-0.05798
48.8594	-0.06104
48.9062	-0.06714
48.9531	-0.06409
49	-0.05493
49.0625	-0.06714
49.1094	-0.07324
49.1562	-0.09766
49.2031	-0.0885
49.25	-0.10071
49.3125	-0.10071
49.3594	-0.10681
49.4062	-0.10071
49.4531	-0.0946
49.5	-0.0824
49.5625	-0.08545
49.6094	-0.0885
49.6562	-0.07629
49.7031	-0.0946
49.75	-0.11292
49.8125	-0.10986
49.8594	-0.10986
49.9062	-0.11902
49.9531	-0.11902
50	-0.13123
50.0625	-0.13428
50.1094	-0.10376
50.1562	-0.12207
50.2031	-0.11902
50.25	-0.12512
50.3125	-0.11902
50.3594	-0.12817
50.4062	-0.12512
50.4531	-0.12207
50.5	-0.11292
50.5625	-0.10986
50.6094	-0.12512
50.6562	-0.11292
50.7031	-0.12512
50.75	-0.10071
50.8125	-0.11597
50.8594	-0.10681
50.9062	-0.10071
50.9531	-0.09766
51	-0.0885
51.0625	-0.0885
51.1094	-0.0946
51.1562	-0.10376
51.2031	-0.10986
51.25	-0.10681
51.3125	-0.10986
51.3594	-0.11597
51.4062	-0.12512
51.4531	-0.12207
51.5	-0.10986
51.5625	-0.10071
51.6094	-0.09766
51.6562	-0.10071
51.7031	-0.11902
51.75	-0.12207
51.8125	-0.11597
51.8594	-0.11597
51.9062	-0.10681
51.9531	-0.13123
52	-0.13733
52.0625	-0.12817
52.1094	-0.11597
52.1562	-0.11597
52.2031	-0.12512
52.25	-0.14038
52.3125	-0.12817
52.3594	-0.11597
52.4062	-0.10376
52.4531	-0.10071
52.5	-0.10071
52.5625	-0.07629
52.6094	-0.07935
52.6562	-0.07629
52.7031	-0.07629
52.75	-0.07935
52.8125	-0.07629
52.8594	-0.0946
52.9062	-0.09766
52.9531	-0.09155
53	-0.06714
53.0625	-0.07629
53.1094	-0.08545
53.1562	-0.08545
53.2031	-0.07019
53.25	-0.05798
53.3125	-0.06409
53.3594	-0.07019
53.4062	-0.07324
53.4531	-0.05493
53.5	-0.06409
53.5625	-0.06409
53.6094	-0.0824
53.6562	-0.0885
53.7031	-0.08545
53.75	-0.09155
53.8125	-0.07324
53.8594	-0.07324
53.9062	-0.06104
53.9531	-0.07935
54	-0.07935
54.0625	-0.08545
54.1094	-0.07019
54.1562	-0.07935
54.2031	-0.07935
54.25	-0.08545
54.3125	-0.0946
54.3594	-0.06409
54.4062	-0.06409
54.4531	-0.06714
54.5	-0.07935
54.5625	-0.07324
54.6094	-0.07324
54.6562	-0.06714
54.7031	-0.07324
54.75	-0.09155
54.8125	-0.07935
54.8594	-0.0885
54.9062	-0.09155
54.9531	-0.09766
55	-0.09155
55.0625	-0.0824
55.1094	-0.07629
55.1562	-0.08545
55.2031	-0.08545
55.25	-0.06409
55.3125	-0.07629
55.3594	-0.0885
55.4062	-0.11902
55.4531	-0.11292
55.5	-0.10681
55.5625	-0.11902
55.6094	-0.12817
55.6562	-0.14038
55.7031	-0.11597
55.75	-0.11292
55.8125	-0.11597
55.8594	-0.12817
55.9062	-0.11292
55.9531	-0.10986
56	-0.10986
56.0625	-0.11902
56.1094	-0.12512
56.1562	-0.10986
56.2031	-0.11902
56.25	-0.13123
56.3125	-0.13733
56.3594	-0.12512
56.4062	-0.12817
56.4531	-0.13428
56.5	-0.14954
56.5625	-0.14954
56.6094	-0.13428
56.6562	-0.13733
56.7031	-0.13733
56.75	-0.13733
56.8125	-0.13123
56.8594	-0.10986
56.9062	-0.10986
56.9531	-0.11597
57	-0.11597
57.0625	-0.10986
57.1094	-0.11292
57.1562	-0.11902
57.2031	-0.12817
57.25	-0.11597
57.3125	-0.11292
57.3594	-0.11902
57.4062	-0.11597
57.4531	-0.11902
57.5	-0.11292
57.5625	-0.10376
57.6094	-0.10986
57.6562	-0.12817
57.7031	-0.10986
57.75	-0.11292
57.8125	-0.10376
57.8594	-0.11292
57.9062	-0.10681
57.9531	-0.0885
58	-0.07935
58.0625	-0.0885
58.1094	-0.0885
58.1562	-0.06714
58.2031	-0.07324
58.25	-0.06714
58.3125	-0.0824
58.3594	-0.0824
58.4062	-0.07019
58.4531	-0.07019
58.5	-0.06714
58.5625	-0.07935
58.6094	-0.07324
58.6562	-0.07629
58.7031	-0.07324
58.75	-0.07935
58.8125	-0.07324
58.8594	-0.07629
58.9062	-0.07935
58.9531	-0.06714
59	-0.06714
59.0625	-0.04883
59.1094	-0.06104
59.1562	-0.07019
59.2031	-0.06714
59.25	-0.04883
59.3125	-0.05188
59.3594	-0.03967
59.4062	-0.04883
59.4531	-0.05188
59.5	-0.02441
59.5625	-0.03357
59.6094	-0.03052
59.6562	-0.04578
59.7031	-0.04578
59.75	-0.03967
59.8125	-0.04272
59.8594	-0.03967
59.9062	-0.03967
59.9531	-0.03662
60	-0.03357
60.0625	-0.03357
60.1094	-0.02441
60.1562	-0.03052
60.2031	-0.03052
60.25	-0.03967
60.3125	-0.04578
60.3594	-0.04883
60.4062	-0.04272
60.4531	-0.03357
60.5	-0.02441
60.5625	-0.03967
60.6094	-0.04272
60.6562	-0.04272
60.7031	-0.03662
60.75	-0.03052
60.8125	-0.03967
60.8594	-0.03357
60.9062	-0.03967
60.9531	-0.05493
61	-0.04272
61.0625	-0.03967
61.1094	-0.05798
61.1562	-0.06714
61.2031	-0.07629
61.25	-0.06409
61.3125	-0.03662
61.3594	-0.04883
61.4062	-0.05798
61.4531	-0.07019
61.5	-0.06714
61.5625	-0.05188
61.6094	-0.05798
61.6562	-0.07019
61.7031	-0.0824
61.75	-0.06714
61.8125	-0.05188
61.8594	-0.03967
61.9062	-0.04883
61.9531	-0.03662
62	-0.04883
62.0625	-0.05188
62.1094	-0.04883
62.1562	-0.03967
62.2031	-0.03967
62.25	-0.04578
62.3125	-0.05188
62.3594	-0.04883
62.4062	-0.02441
62.4531	-0.03052
62.5	-0.04883
62.5625	-0.05798
62.6094	-0.06104
62.6562	-0.06104
62.7031	-0.07019
62.75	-0.0946
62.8125	-0.10681
62.8594	-0.0885
62.9062	-0.09155
62.9531	-0.07019
63	-0.06409
63.0625	-0.06104
63.1094	-0.06104
63.1562	-0.06714
63.2031	-0.06714
63.25	-0.07629
63.3125	-0.06714
63.3594	-0.07324
63.4062	-0.0824
63.4531	-0.09155
63.5	-0.0824
63.5625	-0.07324
63.6094	-0.06714
63.6562	-0.07324
63.7031	-0.07019
63.75	-0.03662
63.8125	-0.04578
63.8594	-0.03967
63.9062	-0.04883
63.9531	-0.04578
64	-0.04272
64.0625	-0.03662
64.1094	-0.02747
64.1562	-0.03967
64.2031	-0.03662
64.25	-0.04578
64.3125	-0.05493
64.3594	-0.05493
64.4062	-0.05493
64.4531	-0.05188
64.5	-0.04272
64.5625	-0.05188
64.6094	-0.04578
64.6562	-0.03052
64.7031	-0.03967
64.75	-0.04272
64.8125	-0.05493
64.8594	-0.04272
64.9062	-0.03662
64.9531	-0.04578
65	-0.05493
65.0625	-0.06104
65.1094	-0.03967
65.1562	-0.03662
65.2031	-0.04578
65.25	-0.05493
65.3125	-0.05188
65.3594	-0.05188
65.4062	-0.05493
65.4531	-0.05188
65.5	-0.05188
65.5625	-0.03967
65.6094	-0.03357
65.6562	-0.03967
65.7031	-0.04578
65.75	-0.04578
65.8125	-0.05188
65.8594	-0.03967
65.9062	-0.04578
65.9531	-0.05188
66	-0.02136
66.0625	-0.02441
66.1094	-0.02441
66.1562	-0.02441
66.2031	-0.00916
66.25	-0.00305
66.3125	0
66.3594	-0.0061
66.4062	0.0061
66.4531	0.02441
66.5	0.01526
66.5625	0.00916
66.6094	0
66.6562	0.02136
66.7031	0.02441
66.75	0.01526
66.8125	0.00916
66.8594	0.00916
66.9062	0.01831
66.9531	0.00916
67	0.02136
67.0625	0.01526
67.1094	0.03662
67.1562	0.00305
67.2031	0.00305
67.25	0.0061
67.3125	0.01526
67.3594	0.01831
67.4062	0.00916
67.4531	0.01526
67.5	0.01221
67.5625	0.02136
67.6094	-0.00916
67.6562	-0.0061
67.7031	-0.0061
67.75	-0.01831
67.8125	-0.03052
67.8594	-0.02441
67.9062	-0.02747
67.9531	-0.03662
68	-0.05188
68.0625	-0.06409
68.1094	-0.06104
68.1562	-0.05798
68.2031	-0.04578
68.25	-0.05798
68.3125	-0.06714
68.3594	-0.07019
68.4062	-0.05798
68.4531	-0.04578
68.5	-0.05188
68.5625	-0.05798
68.6094	-0.07019
68.6562	-0.06104
68.7031	-0.06104
68.75	-0.06714
68.8125	-0.07935
68.8594	-0.0824
68.9062	-0.07324
68.9531	-0.07935
69	-0.08545
69.0625	-0.09155
69.1094	-0.09155
69.1562	-0.10376
69.2031	-0.11597
69.25	-0.11292
69.3125	-0.0946
69.3594	-0.07324
69.4062	-0.10376
69.4531	-0.11902
69.5	-0.12207
69.5625	-0.10986
69.6094	-0.10376
69.6562	-0.11597
69.7031	-0.12207
69.75	-0.10986
69.8125	-0.0885
69.8594	-0.0885
69.9062	-0.0885
69.9531	-0.10071
70	-0.0824
70.0625	-0.09155
70.1094	-0.10071
70.1562	-0.09766
70.2031	-0.12207
70.25	-0.11597
70.3125	-0.13123
70.3594	-0.14038
70.4062	-0.13428
70.4531	-0.11902
70.5	-0.12207
70.5625	-0.12817
70.6094	-0.13428
70.6562	-0.12817
70.7031	-0.09766
70.75	-0.10986
70.8125	-0.11292
70.8594	-0.11902
70.9062	-0.10071
70.9531	-0.0946
71	-0.0885
71.0625	-0.10071
71.1094	-0.11597
71.1562	-0.10071
71.2031	-0.10681
71.25	-0.10986
71.3125	-0.11597
71.3594	-0.10986
71.4062	-0.10986
71.4531	-0.10986
71.5	-0.10986
71.5625	-0.0946
71.6094	-0.0824
71.6562	-0.09155
71.7031	-0.09766
71.75	-0.11292
71.8125	-0.0885
71.8594	-0.09155
71.9062	-0.10071
71.9531	-0.11292
72	-0.10376
72.0625	-0.08545
72.1094	-0.08545
72.1562	-0.0946
72.2031	-0.10376
72.25	-0.0885
72.3125	-0.09155
72.3594	-0.07935
72.4062	-0.09155
72.4531	-0.09766
72.5	-0.07935
72.5625	-0.0824
72.6094	-0.0885
72.6562	-0.0885
72.7031	-0.06714
72.75	-0.07324
72.8125	-0.0885
72.8594	-0.10986
72.9062	-0.10071
72.9531	-0.0946
73	-0.09766
73.0625	-0.10376
73.1094	-0.10071
73.1562	-0.0824
73.2031	-0.08545
73.25	-0.0824
73.3125	-0.0824
73.3594	-0.06714
73.4062	-0.06714
73.4531	-0.05493
73.5	-0.05798
73.5625	-0.07324
73.6094	-0.05798
73.6562	-0.06409
73.7031	-0.07019
73.75	-0.07935
73.8125	-0.07935
73.8594	-0.06714
73.9062	-0.07324
73.9531	-0.0885
74	-0.08545
74.0625	-0.06714
74.1094	-0.0824
74.1562	-0.0885
74.2031	-0.09155
74.25	-0.0824
74.3125	-0.07935
74.3594	-0.07629
74.4062	-0.07629
74.4531	-0.07935
74.5	-0.06409
74.5625	-0.06714
74.6094	-0.06409
74.6562	-0.07935
74.7031	-0.06714
74.75	-0.06104
74.8125	-0.07019
74.8594	-0.07629
74.9062	-0.08545
74.9531	-0.07629
75	-0.07324
75.0625	-0.08545
75.1094	-0.0885
75.1562	-0.07935
75.2031	-0.0824
75.25	-0.0824
75.3125	-0.0824
75.3594	-0.0824
75.4062	-0.06409
75.4531	-0.0824
75.5	-0.09155
75.5625	-0.0885
75.6094	-0.0824
75.6562	-0.07935
75.7031	-0.0824
75.75	-0.08545
75.8125	-0.09155
75.8594	-0.09155
75.9062	-0.0946
75.9531	-0.09766
76	-0.10986
76.0625	-0.10681
76.1094	-0.10071
76.1562	-0.09155
76.2031	-0.09766
76.25	-0.10071
76.3125	-0.10376
76.3594	-0.11292
76.4062	-0.11902
76.4531	-0.11902
76.5	-0.10681
76.5625	-0.11902
76.6094	-0.13123
76.6562	-0.13428
76.7031	-0.13428
76.75	-0.12817
76.8125	-0.13428
76.8594	-0.13733
76.9062	-0.13733
76.9531	-0.13123
77	-0.12817
77.0625	-0.12207
77.1094	-0.11597
77.1562	-0.13428
77.2031	-0.13428
77.25	-0.13733
77.3125	-0.14038
77.3594	-0.14038
77.4062	-0.14038
77.4531	-0.15564
77.5	-0.15869
77.5625	-0.15564
77.6094	-0.14648
77.6562	-0.14343
77.7031	-0.14648
77.75	-0.14954
77.8125	-0.14954
77.8594	-0.12207
77.9062	-0.12207
77.9531	-0.12512
78	-0.13428
78.0625	-0.12512
78.1094	-0.11292
78.1562	-0.0885
78.2031	-0.09155
78.25	-0.10681
78.3125	-0.0824
78.3594	-0.0824
78.4062	-0.0824
78.4531	-0.08545
78.5	-0.08545
78.5625	-0.0885
78.6094	-0.07629
78.6562	-0.07324
78.7031	-0.06409
78.75	-0.03662
78.8125	-0.04272
78.8594	-0.05188
78.9062	-0.06104
78.9531	-0.05188
79	-0.02747
79.0625	-0.03052
79.1094	-0.04883
79.1562	-0.06104
79.2031	-0.04578
79.25	-0.04272
79.3125	-0.03967
79.3594	-0.04578
79.4062	-0.03662
79.4531	-0.03052
79.5	-0.03967
79.5625	-0.03662
79.6094	-0.04883
79.6562	-0.03052
79.7031	-0.03967
79.75	-0.04883
79.8125	-0.04883
79.8594	-0.03052
79.9062	-0.03662
79.9531	-0.05493
80	-0.05798
80.0625	-0.05493
80.1094	-0.02747
80.1562	-0.02747
80.2031	-0.03967
80.25	-0.04883
80.3125	-0.03967
80.3594	-0.03357
80.4062	-0.03357
80.4531	-0.05188
80.5	-0.05798
80.5625	-0.04272
80.6094	-0.04883
80.6562	-0.04883
80.7031	-0.05188
80.75	-0.04272
80.8125	-0.04883
80.8594	-0.05493
80.9062	-0.05798
80.9531	-0.04578
81	-0.03052
81.0625	-0.03662
81.1094	-0.05188
81.1562	-0.07019
81.2031	-0.04883
81.25	-0.05493
81.3125	-0.06104
81.3594	-0.06714
81.4062	-0.06409
81.4531	-0.05493
81.5	-0.05493
81.5625	-0.05798
81.6094	-0.06714
81.6562	-0.05188
81.7031	-0.05798
81.75	-0.06714
81.8125	-0.07629
81.8594	-0.07629
81.9062	-0.06714
81.9531	-0.06409
82	-0.07324
82.0625	-0.07935
82.1094	-0.05798
82.1562	-0.06104
82.2031	-0.06104
82.25	-0.07324
82.3125	-0.07324
82.3594	-0.06104
82.4062	-0.06409
82.4531	-0.06714
82.5	-0.07935
82.5625	-0.06714
82.6094	-0.06104
82.6562	-0.07324
82.7031	-0.0824
82.75	-0.07629
82.8125	-0.07324
82.8594	-0.06409
82.9062	-0.07019
82.9531	-0.07629
83	-0.04578
83.0625	-0.05188
83.1094	-0.06409
83.1562	-0.06409
83.2031	-0.05798
83.25	-0.05493
83.3125	-0.04578
83.3594	-0.04578
83.4062	-0.04883
83.4531	-0.03662
83.5	-0.05188
83.5625	-0.06104
83.6094	-0.05493
83.6562	-0.05188
83.7031	-0.06104
83.75	-0.04883
83.8125	-0.05798
83.8594	-0.06104
83.9062	-0.04883
83.9531	-0.07324
84	-0.05798
84.0625	-0.08545
84.1094	-0.07324
84.1562	-0.07935
84.2031	-0.07324
84.25	-0.06409
84.3125	-0.06714
84.3594	-0.07019
84.4062	-0.06409
84.4531	-0.06104
84.5	-0.05493
84.5625	-0.05493
84.6094	-0.06714
84.6562	-0.06714
84.7031	-0.06409
84.75	-0.06104
84.8125	-0.06104
84.8594	-0.07324
84.9062	-0.0824
84.9531	-0.07935
85	-0.07324
85.0625	-0.07019
85.1094	-0.06409
85.1562	-0.07019
85.2031	-0.08545
85.25	-0.06409
85.3125	-0.05798
85.3594	-0.05188
85.4062	-0.05493
85.4531	-0.04578
85.5	-0.04272
85.5625	-0.04272
85.6094	-0.04883
85.6562	-0.04578
85.7031	-0.03662
85.75	-0.04578
85.8125	-0.05188
85.8594	-0.05798
85.9062	-0.03357
85.9531	-0.03052
86	-0.04272
86.0625	-0.04883
86.1094	-0.03967
86.1562	-0.01831
86.2031	-0.01831
86.25	-0.02441
86.3125	-0.03967
86.3594	-0.02441
86.4062	-0.03357
86.4531	-0.03662
86.5	-0.04578
86.5625	-0.04272
86.6094	-0.04883
86.6562	-0.05493
86.7031	-0.04578
86.75	-0.03052
86.8125	-0.00916
86.8594	-0.02441
86.9062	-0.02441
86.9531	-0.03357
87	-0.01526
87.0625	-0.0061
87.1094	-0.01831
87.1562	-0.03662
87.2031	-0.04883
87.25	-0.03357
87.3125	-0.03662
87.3594	-0.04272
87.4062	-0.05798
87.4531	-0.06104
87.5	-0.05188
87.5625	-0.04578
87.6094	-0.03662
87.6562	-0.04272
87.7031	-0.03357
87.75	-0.04272
87.8125	-0.04578
87.8594	-0.03357
87.9062	-0.03662
87.9531	-0.05188
88	-0.06104
88.0625	-0.06714
88.1094	-0.07019
88.1562	-0.04883
88.2031	-0.06409
88.25	-0.07324
88.3125	-0.08545
88.3594	-0.0885
88.4062	-0.07629
88.4531	-0.06714
88.5	-0.06714
88.5625	-0.06714
88.6094	-0.04883
88.6562	-0.05798
88.7031	-0.06714
88.75	-0.07629
88.8125	-0.0946
88.8594	-0.09155
88.9062	-0.10681
88.9531	-0.10681
89	-0.10681
89.0625	-0.10071
89.1094	-0.11292
89.1562	-0.12207
89.2031	-0.14343
89.25	-0.12512
89.3125	-0.12207
89.3594	-0.12207
89.4062	-0.12817
89.4531	-0.13428
89.5	-0.11292
89.5625	-0.12512
89.6094	-0.13428
89.6562	-0.14038
89.7031	-0.12817
89.75	-0.13428
89.8125	-0.12512
89.8594	-0.12817
89.9062	-0.13123
89.9531	-0.13123
90	-0.13428
90.0625	-0.13733
90.1094	-0.12817
90.1562	-0.11902
90.2031	-0.12512
90.25	-0.12512
90.3125	-0.12512
90.3594	-0.10986
90.4062	-0.10071
90.4531	-0.10986
90.5	-0.11902
90.5625	-0.12512
90.6094	-0.11292
90.6562	-0.11902
90.7031	-0.11902
90.75	-0.13123
90.8125	-0.12207
90.8594	-0.11902
90.9062	-0.12207
90.9531	-0.12512
91	-0.13123
91.0625	-0.10681
91.1094	-0.10986
91.1562	-0.11292
91.2031	-0.10986
91.25	-0.10986
91.3125	-0.0946
91.3594	-0.09766
91.4062	-0.10986
91.4531	-0.10986
91.5	-0.0946
91.5625	-0.0946
91.6094	-0.0946
91.6562	-0.10681
91.7031	-0.10376
91.75	-0.0946
91.8125	-0.09155
91.8594	-0.09155
91.9062	-0.0946
91.9531	-0.0824
92	-0.07935
92.0625	-0.07935
92.1094	-0.0885
92.1562	-0.07629
92.2031	-0.06714
92.25	-0.06409
92.3125	-0.06409
92.3594	-0.07019
92.4062	-0.06104
92.4531	-0.06714
92.5	-0.07629
92.5625	-0.0946
92.6094	-0.10376
92.6562	-0.11597
92.7031	-0.11292
92.75	-0.10071
92.8125	-0.09766
92.8594	-0.06714
92.9062	-0.07324
92.9531	-0.07935
93	-0.07629
93.0625	-0.07324
93.1094	-0.07019
93.1562	-0.07019
93.2031	-0.07629
93.25	-0.08545
93.3125	-0.0824
93.3594	-0.07324
93.4062	-0.05493
93.4531	-0.05188
93.5	-0.06714
93.5625	-0.05493
93.6094	-0.04883
93.6562	-0.04578
93.7031	-0.06104
93.75	-0.07019
93.8125	-0.07019
93.8594	-0.07324
93.9062	-0.07935
93.9531	-0.07324
94	-0.07324
94.0625	-0.0885
94.1094	-0.0946
94.1562	-0.0824
94.2031	-0.06104
94.25	-0.06104
94.3125	-0.07019
94.3594	-0.07935
94.4062	-0.06104
94.4531	-0.06409
94.5	-0.06714
94.5625	-0.07629
94.6094	-0.0824
94.6562	-0.07324
94.7031	-0.0824
94.75	-0.08545
94.8125	-0.07935
94.8594	-0.07629
94.9062	-0.0824
94.9531	-0.09155
95	-0.09766
95.0625	-0.0885
95.1094	-0.09766
95.1562	-0.11292
95.2031	-0.12207
95.25	-0.12207
95.3125	-0.10071
95.3594	-0.0946
95.4062	-0.10071
95.4531	-0.10071
95.5	-0.10071
95.5625	-0.09155
95.6094	-0.0824
95.6562	-0.0885
95.7031	-0.10376
95.75	-0.10376
95.8125	-0.10986
95.8594	-0.10681
95.9062	-0.09155
95.9531	-0.10071
96	-0.09766
96.0625	-0.0946
96.1094	-0.0946
96.1562	-0.0885
96.2031	-0.06714
96.25	-0.08545
96.3125	-0.0885
96.3594	-0.09766
96.4062	-0.10376
96.4531	-0.0946
96.5	-0.10376
96.5625	-0.11292
96.6094	-0.13428
96.6562	-0.12512
96.7031	-0.13123
96.75	-0.13123
96.8125	-0.13733
96.8594	-0.14648
96.9062	-0.14038
96.9531	-0.14648
97	-0.14038
97.0625	-0.13733
97.1094	-0.12817
97.1562	-0.13733
97.2031	-0.13733
97.25	-0.13428
97.3125	-0.12512
97.3594	-0.12207
97.4062	-0.12817
97.4531	-0.12817
97.5	-0.13428
97.5625	-0.10376
97.6094	-0.10071
97.6562	-0.10986
97.7031	-0.11292
97.75	-0.10986
97.8125	-0.10986
97.8594	-0.10681
97.9062	-0.10681
97.9531	-0.11597
98	-0.10681
98.0625	-0.12207
98.1094	-0.10986
98.1562	-0.11292
98.2031	-0.10681
98.25	-0.10986
98.3125	-0.11292
98.3594	-0.11292
98.4062	-0.10071
98.4531	-0.08545
98.5	-0.0946
98.5625	-0.10986
98.6094	-0.11292
98.6562	-0.0885
98.7031	-0.07935
98.75	-0.07629
98.8125	-0.0824
98.8594	-0.07935
98.9062	-0.05798
98.9531	-0.05798
99	-0.05493
99.0625	-0.06714
99.1094	-0.05798
99.1562	-0.05188
99.2031	-0.04883
99.25	-0.05493
99.3125	-0.04578
99.3594	-0.02747
99.4062	-0.02136
99.4531	-0.03052
99.5	-0.03357
99.5625	-0.02136
99.6094	-0.03357
99.6562	-0.02441
99.7031	-0.04883
99.75	-0.05188
99.8125	-0.03357
[truncated: 98,004 more rows]

## Sheet: Figure 6 C ii left
Example trace
CMUS
Time(ms)	voltage(mv)
0	-0.15564
0.05	-0.15259
0.1	-0.15564
0.15	-0.15564
0.2	-0.16785
0.25	-0.14038
0.3	-0.14038
0.35	-0.12512
0.4	-0.13733
0.45	-0.15259
0.5	-0.14343
0.55	-0.12817
0.6	-0.12512
0.65	-0.13733
0.7	-0.13428
0.75	-0.14343
0.8	-0.12817
0.85	-0.11292
0.9	-0.11292
0.95	-0.10986
1	-0.10376
1.05	-0.11292
1.1	-0.0885
1.15	-0.06104
1.2	-0.07019
1.25	-0.07019
1.3	-0.05493
1.35	-0.06714
1.4	-0.07019
1.45	-0.07019
1.5	-0.07935
1.55	-0.0885
1.6	-0.05798
1.65	-0.05493
1.7	-0.07324
1.75	-0.0824
1.8	-0.07324
1.85	-0.07935
1.9	-0.07935
1.95	-0.06714
2	-0.08545
2.05	-0.06714
2.1	-0.06104
2.15	-0.07019
2.2	-0.07019
2.25	-0.04578
2.3	-0.04578
2.35	-0.04883
2.4	-0.05188
2.45	-0.06409
2.5	-0.04578
2.55	-0.06104
2.6	-0.06104
2.65	-0.07629
2.7	-0.07629
2.75	-0.07935
2.8	-0.0885
2.85	-0.10986
2.9	-0.10071
2.95	-0.06714
3	-0.07629
3.05	-0.06409
3.1	-0.04883
3.15	-0.05188
3.2	-0.03967
3.25	-0.03662
3.3	-0.05798
3.35	-0.05798
3.4	-0.04272
3.45	-0.05493
3.5	-0.06409
3.55	-0.07019
3.6	-0.05188
3.65	-0.05493
3.7	-0.06714
3.75	-0.07935
3.8	-0.06714
3.85	-0.06409
3.9	-0.07019
3.95	-0.08545
4	-0.11292
4.05	-0.10376
4.1	-0.07935
4.15	-0.0824
4.2	-0.0824
4.25	-0.0885
4.3	-0.07324
4.35	-0.07629
4.4	-0.07935
4.45	-0.0824
4.5	-0.06409
4.55	-0.07935
4.6	-0.09766
4.65	-0.0946
4.7	-0.10071
4.75	-0.07324
4.8	-0.06714
4.85	-0.0885
4.9	-0.10681
4.95	-0.07629
5	-0.06714
5.05	-0.06409
5.1	-0.08545
5.15	-0.10071
5.2	-0.10071
5.25	-0.10071
5.3	-0.0946
5.35	-0.09155
5.4	-0.07935
5.45	-0.07629
5.5	-0.0885
5.55	-0.10681
5.6	-0.09766
5.65	-0.10071
5.7	-0.10986
5.75	-0.11902
5.8	-0.12817
5.85	-0.0885
5.9	-0.06714
5.95	-0.07629
6	-0.08545
6.05	-0.09155
6.1	-0.0824
6.15	-0.07629
6.2	-0.07935
6.25	-0.0946
6.3	-0.08545
6.35	-0.10071
6.4	-0.10376
6.45	-0.10376
6.5	-0.10071
6.55	-0.10681
6.6	-0.11292
6.65	-0.13123
6.7	-0.12207
6.75	-0.07324
6.8	-0.07324
6.85	-0.07629
6.9	-0.09155
6.95	-0.0885
7	-0.06714
7.05	-0.07019
7.1	-0.08545
7.15	-0.10071
7.2	-0.09155
7.25	-0.10071
7.3	-0.0885
7.35	-0.09155
7.4	-0.08545
7.45	-0.07629
7.5	-0.0824
7.55	-0.09155
7.6	-0.07629
7.65	-0.06409
7.7	-0.07629
7.75	-0.0824
7.8	-0.10986
7.85	-0.10071
7.9	-0.07935
7.95	-0.0885
8	-0.0824
8.05	-0.0946
8.1	-0.0824
8.15	-0.07324
8.2	-0.07935
8.25	-0.09155
8.3	-0.07935
8.35	-0.08545
8.4	-0.10376
8.45	-0.09155
8.5	-0.09155
8.55	-0.07324
8.6	-0.05188
8.65	-0.05798
8.7	-0.06409
8.75	-0.03052
8.8	-0.03357
8.85	-0.03662
8.9	-0.03662
8.95	-0.06104
9	-0.03967
9.05	-0.02747
9.1	-0.03662
9.15	-0.04272
9.2	-0.02747
9.25	-0.04883
9.3	-0.04272
9.35	-0.03662
9.4	-0.04578
9.45	-0.02441
9.5	-0.02136
9.55	-0.03662
9.6	-0.04883
9.65	-0.04272
9.7	-0.04883
9.75	-0.06104
9.8	-0.06104
9.85	-0.05493
9.9	-0.05188
9.95	-0.05798
10	-0.06104
10.05	-0.07324
10.1	-0.06104
10.15	-0.03357
10.2	-0.05798
10.25	-0.07324
10.3	-0.06104
10.35	-0.05188
10.4	-0.05798
10.45	-0.05493
10.5	-0.07324
10.55	-0.06104
10.6	-0.03967
10.65	-0.04272
10.7	-0.06409
10.75	-0.06714
10.8	-0.05798
10.85	-0.06714
10.9	-0.07935
10.95	-0.0946
11	-0.08545
11.05	-0.10071
11.1	-0.10986
11.15	-0.11597
11.2	-0.11292
11.25	-0.0946
11.3	-0.0946
11.35	-0.12512
11.4	-0.14343
11.45	-0.12207
11.5	-0.14343
11.55	-0.14343
11.6	-0.14648
11.65	-0.15869
11.7	-0.15259
11.75	-0.13428
11.8	-0.15259
11.85	-0.16479
11.9	-0.15259
11.95	-0.177
12	-0.18005
12.05	-0.16785
12.1	-0.14648
12.15	-0.14038
12.2	-0.15564
12.25	-0.15564
12.3	-0.15869
12.35	-0.12817
12.4	-0.11292
12.45	-0.13428
12.5	-0.15564
12.55	-0.14343
12.6	-0.14038
12.65	-0.14343
12.7	-0.14038
12.75	-0.16174
12.8	-0.16174
12.85	-0.18005
12.9	-0.16785
12.95	-0.16785
13	-0.13733
13.05	-0.12512
13.1	-0.13733
13.15	-0.14954
13.2	-0.15869
13.25	-0.12817
13.3	-0.14038
13.35	-0.14954
13.4	-0.14954
13.45	-0.14038
13.5	-0.12817
13.55	-0.09766
13.6	-0.12512
13.65	-0.14343
13.7	-0.12207
13.75	-0.13733
13.8	-0.13123
13.85	-0.11597
13.9	-0.10986
13.95	-0.11597
14	-0.11292
14.05	-0.12207
14.1	-0.10986
14.15	-0.09155
14.2	-0.09766
14.25	-0.11597
14.3	-0.13733
14.35	-0.13733
14.4	-0.12817
14.45	-0.14343
14.5	-0.15259
14.55	-0.14648
14.6	-0.12817
14.65	-0.11902
14.7	-0.10376
14.75	-0.12207
14.8	-0.11597
14.85	-0.11597
14.9	-0.13123
14.95	-0.12512
15	-0.10986
15.05	-0.09766
15.1	-0.10986
15.15	-0.11597
15.2	-0.12512
15.25	-0.10071
15.3	-0.10681
15.35	-0.10681
15.4	-0.12817
15.45	-0.12207
15.5	-0.11902
15.55	-0.12207
15.6	-0.11902
15.65	-0.12512
15.7	-0.10681
15.75	-0.10681
15.8	-0.10071
15.85	-0.10376
15.9	-0.10986
15.95	-0.10376
16	-0.11292
16.05	-0.11902
16.1	-0.11902
16.15	-0.0946
16.2	-0.09155
16.25	-0.09766
16.3	-0.10071
16.35	-0.10376
16.4	-0.10376
16.45	-0.10681
16.5	-0.11292
16.55	-0.12207
16.6	-0.09766
16.65	-0.09766
16.7	-0.10071
16.75	-0.10681
16.8	-0.10986
16.85	-0.11292
16.9	-0.10376
16.95	-0.09766
17	-0.10986
17.05	-0.09766
17.1	-0.10986
17.15	-0.10071
17.2	-0.11292
17.25	-0.11597
17.3	-0.11902
17.35	-0.11292
17.4	-0.11292
17.45	-0.11292
17.5	-0.09155
17.55	-0.10681
17.6	-0.10986
17.65	-0.10986
17.7	-0.11292
17.75	-0.11597
17.8	-0.11292
17.85	-0.11902
17.9	-0.11597
17.95	-0.10986
18	-0.12512
18.05	-0.11902
18.1	-0.11902
18.15	-0.14343
18.2	-0.12207
18.25	-0.11597
18.3	-0.13123
18.35	-0.11292
18.4	-0.10986
18.45	-0.13428
18.5	-0.12207
18.55	-0.13123
18.6	-0.12512
18.65	-0.11597
18.7	-0.14038
18.75	-0.16479
18.8	-0.14648
18.85	-0.13428
18.9	-0.13733
18.95	-0.14038
19	-0.16479
19.05	-0.16479
19.1	-0.15259
19.15	-0.15564
19.2	-0.14954
19.25	-0.14648
19.3	-0.14648
19.35	-0.15869
19.4	-0.15259
19.45	-0.15564
19.5	-0.12817
19.55	-0.14343
19.6	-0.16785
19.65	-0.17395
19.7	-0.15259
19.75	-0.12512
19.8	-0.13428
19.85	-0.13733
19.9	-0.15259
19.95	-0.14343
20	-0.13428
20.05	-0.12817
20.1	-0.15259
20.15	-0.16479
20.2	-0.14954
20.25	-0.15259
20.3	-0.14954
20.35	-0.14038
20.4	-0.14038
20.45	-0.15564
20.5	-0.15564
20.55	-0.16479
20.6	-0.13428
20.65	-0.11292
20.7	-0.12207
20.75	-0.13733
20.8	-0.13428
20.85	-0.13428
20.9	-0.10986
20.95	-0.10071
21	-0.12512
21.05	-0.12817
21.1	-0.11597
21.15	-0.11597
21.2	-0.10681
21.25	-0.10986
21.3	-0.09766
21.35	-0.09766
21.4	-0.09766
21.45	-0.09766
21.5	-0.08545
21.55	-0.07629
21.6	-0.07629
21.65	-0.0885
21.7	-0.0824
21.75	-0.03052
21.8	-0.04272
21.85	-0.05493
21.9	-0.07019
21.95	-0.07324
22	-0.05798
22.05	-0.03662
22.1	-0.04883
22.15	-0.07019
22.2	-0.03662
22.25	-0.05493
22.3	-0.06714
22.35	-0.06409
22.4	-0.05188
22.45	-0.05798
22.5	-0.05188
22.55	-0.06409
22.6	-0.07324
22.65	-0.05188
22.7	-0.05493
22.75	-0.07019
22.8	-0.0885
22.85	-0.07019
22.9	-0.06104
22.95	-0.07019
23	-0.0824
23.05	-0.07935
23.1	-0.07935
23.15	-0.0824
23.2	-0.07629
23.25	-0.08545
23.3	-0.07324
23.35	-0.06714
23.4	-0.06409
23.45	-0.07019
23.5	-0.06714
23.55	-0.04272
23.6	-0.04883
23.65	-0.06714
23.7	-0.07935
23.75	-0.06104
23.8	-0.07324
23.85	-0.0946
23.9	-0.10376
23.95	-0.12512
24	-0.10986
24.05	-0.10376
24.1	-0.10071
24.15	-0.10071
24.2	-0.07629
24.25	-0.06104
24.3	-0.05188
24.35	-0.06104
24.4	-0.05798
24.45	-0.03662
24.5	-0.05798
24.55	-0.07324
24.6	-0.0824
24.65	-0.0885
24.7	-0.09155
24.75	-0.0885
24.8	-0.10681
24.85	-0.10681
24.9	-0.09766
24.95	-0.10986
25	-0.10986
25.05	-0.10986
25.1	-0.0885
25.15	-0.0885
25.2	-0.0885
25.25	-0.09155
25.3	-0.0946
25.35	-0.0824
25.4	-0.0824
25.45	-0.09155
25.5	-0.10376
25.55	-0.0824
25.6	-0.07019
25.65	-0.07629
25.7	-0.07935
25.75	-0.09155
25.8	-0.10376
25.85	-0.10071
25.9	-0.10681
25.95	-0.10681
26	-0.07019
26.05	-0.09155
26.1	-0.0946
26.15	-0.10681
26.2	-0.10071
26.25	-0.0885
26.3	-0.10071
26.35	-0.11597
26.4	-0.10986
26.45	-0.09155
26.5	-0.08545
26.55	-0.07629
26.6	-0.0946
26.65	-0.10071
26.7	-0.09766
26.75	-0.09766
26.8	-0.0946
26.85	-0.08545
26.9	-0.07324
26.95	-0.0824
27	-0.08545
27.05	-0.09766
27.1	-0.07324
27.15	-0.07019
27.2	-0.0824
27.25	-0.0885
27.3	-0.10681
27.35	-0.07935
27.4	-0.06104
27.45	-0.07324
27.5	-0.0885
27.55	-0.0824
27.6	-0.0824
27.65	-0.08545
27.7	-0.07324
27.75	-0.09766
27.8	-0.0885
27.85	-0.10376
27.9	-0.11902
27.95	-0.12207
28	-0.10071
28.05	-0.11292
28.1	-0.11597
28.15	-0.11902
28.2	-0.12512
28.25	-0.07324
28.3	-0.07324
28.35	-0.09155
28.4	-0.0946
28.45	-0.08545
28.5	-0.08545
28.55	-0.06104
28.6	-0.07019
28.65	-0.0885
28.7	-0.06714
28.75	-0.07629
28.8	-0.06714
28.85	-0.05188
28.9	-0.04272
28.95	-0.04883
29	-0.05798
29.05	-0.07629
29.1	-0.07629
29.15	-0.05188
29.2	-0.07019
29.25	-0.0824
29.3	-0.0824
29.35	-0.06104
29.4	-0.04883
29.45	-0.03052
29.5	-0.04272
29.55	-0.04883
29.6	-0.01831
29.65	-0.02136
29.7	-0.02136
29.75	-0.01831
29.8	-0.00916
29.85	-0.03662
29.9	-0.04883
29.95	-0.05493
30	-0.06104
30.05	-0.04578
30.1	-0.05188
30.15	-0.06104
30.2	-0.07019
30.25	-0.03662
30.3	-0.05798
30.35	-0.06409
30.4	-0.07629
30.45	-0.09155
30.5	-0.0885
30.55	-0.08545
30.6	-0.10071
30.65	-0.10376
30.7	-0.07324
30.75	-0.07935
30.8	-0.07629
30.85	-0.08545
30.9	-0.0885
30.95	-0.08545
31	-0.0824
31.05	-0.0946
31.1	-0.10376
31.15	-0.07935
31.2	-0.07629
31.25	-0.07629
31.3	-0.10071
31.35	-0.0885
31.4	-0.10071
31.45	-0.11597
31.5	-0.12207
31.55	-0.13428
31.6	-0.12817
31.65	-0.12207
31.7	-0.12817
31.75	-0.14954
31.8	-0.13428
31.85	-0.12817
31.9	-0.14954
31.95	-0.15259
32	-0.14954
32.05	-0.12817
32.1	-0.12512
32.15	-0.12207
32.2	-0.13428
32.25	-0.13733
32.3	-0.14038
32.35	-0.14648
32.4	-0.14954
32.45	-0.16479
32.5	-0.12817
32.55	-0.15564
32.6	-0.1709
32.65	-0.16479
32.7	-0.14954
32.75	-0.14343
32.8	-0.12512
32.85	-0.14954
32.9	-0.16785
32.95	-0.14648
33	-0.14648
33.05	-0.14648
33.1	-0.15564
33.15	-0.13428
33.2	-0.13428
33.25	-0.13428
33.3	-0.11597
33.35	-0.12512
33.4	-0.14038
33.45	-0.14648
33.5	-0.14038
33.55	-0.14343
33.6	-0.11902
33.65	-0.10376
33.7	-0.10986
33.75	-0.11292
33.8	-0.10986
33.85	-0.10986
33.9	-0.09766
33.95	-0.08545
34	-0.11597
34.05	-0.13123
34.1	-0.13123
34.15	-0.13428
34.2	-0.12207
34.25	-0.13123
34.3	-0.13733
34.35	-0.14648
34.4	-0.13733
34.45	-0.11292
34.5	-0.10376
34.55	-0.11597
34.6	-0.12512
34.65	-0.13123
34.7	-0.13123
34.75	-0.10986
34.8	-0.10071
34.85	-0.11902
34.9	-0.12512
34.95	-0.09155
35	-0.10071
35.05	-0.0824
35.1	-0.07935
35.15	-0.0946
35.2	-0.09155
35.25	-0.07324
35.3	-0.09155
35.35	-0.08545
35.4	-0.06104
35.45	-0.08545
35.5	-0.0946
35.55	-0.10681
35.6	-0.10071
35.65	-0.0885
35.7	-0.10071
35.75	-0.11292
35.8	-0.11292
35.85	-0.0946
35.9	-0.09155
35.95	-0.08545
36	-0.09155
36.05	-0.0946
36.1	-0.08545
36.15	-0.09766
36.2	-0.09766
36.25	-0.0946
36.3	-0.08545
36.35	-0.10376
36.4	-0.10376
36.45	-0.10376
36.5	-0.09155
36.55	-0.0824
36.6	-0.0885
36.65	-0.10071
36.7	-0.11292
36.75	-0.07935
36.8	-0.0824
36.85	-0.09155
36.9	-0.10986
36.95	-0.10071
37	-0.0946
37.05	-0.10376
37.1	-0.10986
37.15	-0.11597
37.2	-0.10376
37.25	-0.10071
37.3	-0.10071
37.35	-0.11292
37.4	-0.10071
37.45	-0.0946
37.5	-0.10681
37.55	-0.12207
37.6	-0.12512
37.65	-0.11902
37.7	-0.11902
37.75	-0.13123
37.8	-0.14038
37.85	-0.12207
37.9	-0.11902
37.95	-0.12512
38	-0.11292
38.05	-0.12207
38.1	-0.11292
38.15	-0.10376
38.2	-0.11902
38.25	-0.13733
38.3	-0.12207
38.35	-0.12817
38.4	-0.14343
38.45	-0.12817
38.5	-0.13733
38.55	-0.11902
38.6	-0.10986
38.65	-0.13428
38.7	-0.15259
38.75	-0.14038
38.8	-0.15869
38.85	-0.15869
38.9	-0.15259
38.95	-0.15869
39	-0.13428
39.05	-0.13733
39.1	-0.16479
39.15	-0.1709
39.2	-0.14038
39.25	-0.15869
39.3	-0.15259
39.35	-0.16785
39.4	-0.17395
39.45	-0.15564
39.5	-0.14648
39.55	-0.15869
39.6	-0.16479
39.65	-0.15259
39.7	-0.15869
39.75	-0.15564
39.8	-0.15564
39.85	-0.15259
39.9	-0.14954
39.95	-0.15564
40	-0.15564
40.05	-0.15564
40.1	-0.12512
40.15	-0.13123
40.2	-0.15869
40.25	-0.16785
40.3	-0.14648
40.35	-0.12817
40.4	-0.11902
40.45	-0.11597
40.5	-0.13123
40.55	-0.10986
40.6	-0.10986
40.65	-0.13123
40.7	-0.12817
40.75	-0.12512
40.8	-0.13428
40.85	-0.13428
40.9	-0.12207
40.95	-0.11292
41	-0.06714
41.05	-0.07324
41.1	-0.0946
41.15	-0.10986
41.2	-0.0824
41.25	-0.07324
41.3	-0.07935
41.35	-0.0885
41.4	-0.10071
41.45	-0.0824
41.5	-0.08545
41.55	-0.08545
41.6	-0.10071
41.65	-0.0946
41.7	-0.08545
41.75	-0.07629
41.8	-0.07019
41.85	-0.04272
41.9	-0.04272
41.95	-0.05493
42	-0.05493
42.05	-0.07324
42.1	-0.05798
42.15	-0.04578
42.2	-0.06104
42.25	-0.07935
42.3	-0.08545
42.35	-0.06714
42.4	-0.05798
42.45	-0.06409
42.5	-0.07324
42.55	-0.07019
42.6	-0.07324
42.65	-0.06409
42.7	-0.05493
42.75	-0.06409
42.8	-0.04578
42.85	-0.06104
42.9	-0.07935
42.95	-0.08545
43	-0.05493
43.05	-0.06714
43.1	-0.0824
43.15	-0.0885
43.2	-0.09766
43.25	-0.05798
43.3	-0.04578
43.35	-0.05493
43.4	-0.0824
43.45	-0.07629
43.5	-0.07324
43.55	-0.07019
43.6	-0.08545
43.65	-0.0824
43.7	-0.07629
43.75	-0.0885
43.8	-0.08545
43.85	-0.0824
43.9	-0.07324
43.95	-0.08545
44	-0.08545
44.05	-0.10376
44.1	-0.0946
44.15	-0.07324
44.2	-0.07935
44.25	-0.09155
44.3	-0.10071
44.35	-0.07935
44.4	-0.07019
44.45	-0.0885
44.5	-0.09155
44.55	-0.08545
44.6	-0.08545
44.65	-0.0824
44.7	-0.07935
44.75	-0.0946
44.8	-0.0824
44.85	-0.07935
44.9	-0.0946
44.95	-0.0885
45	-0.07935
45.05	-0.06714
45.1	-0.06714
45.15	-0.07019
45.2	-0.0824
45.25	-0.06409
45.3	-0.07935
45.35	-0.08545
45.4	-0.10986
45.45	-0.10376
45.5	-0.0824
45.55	-0.09155
45.6	-0.0885
45.65	-0.08545
45.7	-0.06714
45.75	-0.07324
45.8	-0.08545
45.85	-0.10681
45.9	-0.10376
45.95	-0.09155
46	-0.09155
46.05	-0.09155
46.1	-0.10071
46.15	-0.07629
46.2	-0.07935
46.25	-0.07324
46.3	-0.08545
46.35	-0.06714
46.4	-0.07935
46.45	-0.0946
46.5	-0.09766
46.55	-0.10681
46.6	-0.0824
46.65	-0.08545
46.7	-0.10986
46.75	-0.11902
46.8	-0.10986
46.85	-0.10376
46.9	-0.09766
46.95	-0.10376
47	-0.11292
47.05	-0.0824
47.1	-0.0946
47.15	-0.10071
47.2	-0.09766
47.25	-0.09155
47.3	-0.10376
47.35	-0.09766
47.4	-0.10071
47.45	-0.10681
47.5	-0.07019
47.55	-0.0946
47.6	-0.10681
47.65	-0.10376
47.7	-0.09155
47.75	-0.07019
47.8	-0.07324
47.85	-0.0946
47.9	-0.09155
47.95	-0.06409
48	-0.07324
48.05	-0.06104
48.1	-0.08545
48.15	-0.09766
48.2	-0.10376
48.25	-0.10376
48.3	-0.10681
48.35	-0.07629
48.4	-0.05798
48.45	-0.07629
48.5	-0.06714
48.55	-0.07019
48.6	-0.03967
48.65	-0.02441
48.7	-0.04272
48.75	-0.05493
48.8	-0.03967
48.85	-0.02136
48.9	-0.0061
48.95	0
49	-0.03357
49.05	-0.01526
49.1	-0.02441
49.15	-0.04578
49.2	-0.03052
49.25	-0.03967
49.3	-0.05188
49.35	-0.05798
49.4	-0.04883
49.45	-0.04272
49.5	-0.01526
49.55	-0.03052
49.6	-0.05188
49.65	-0.06714
49.7	-0.05798
49.75	-0.02747
49.8	-0.02747
49.85	-0.03967
49.9	-0.05493
49.95	-0.05798
50	-0.07019
50.05	-0.03967
50.1	-0.06409
50.15	-0.06714
50.2	-0.06104
50.25	-0.06714
50.3	-0.06409
50.35	-0.04883
50.4	-0.05798
50.45	-0.07019
50.5	-0.05493
50.55	-0.06714
50.6	-0.05798
50.65	-0.05493
50.7	-0.07019
50.75	-0.09155
50.8	-0.10681
50.85	-0.11292
50.9	-0.10071
50.95	-0.0946
51	-0.0885
51.05	-0.10071
51.1	-0.11292
51.15	-0.10986
51.2	-0.09766
51.25	-0.10071
51.3	-0.09155
51.35	-0.10376
51.4	-0.12512
51.45	-0.12207
51.5	-0.11902
51.55	-0.11292
51.6	-0.11292
51.65	-0.11597
51.7	-0.13123
51.75	-0.10681
51.8	-0.11902
51.85	-0.12817
51.9	-0.14648
51.95	-0.14038
52	-0.13428
52.05	-0.14038
52.1	-0.15869
52.15	-0.14343
52.2	-0.13428
52.25	-0.14648
52.3	-0.12817
52.35	-0.13733
52.4	-0.12817
52.45	-0.11902
52.5	-0.11902
52.55	-0.13428
52.6	-0.12512
52.65	-0.11292
52.7	-0.12817
52.75	-0.12817
52.8	-0.13428
52.85	-0.13123
52.9	-0.14343
52.95	-0.14954
53	-0.15869
53.05	-0.15564
53.1	-0.14343
53.15	-0.14038
53.2	-0.14648
53.25	-0.15259
53.3	-0.11902
53.35	-0.12512
53.4	-0.12817
53.45	-0.11902
53.5	-0.13733
53.55	-0.12817
53.6	-0.10986
53.65	-0.12817
53.7	-0.14038
53.75	-0.11597
53.8	-0.13123
53.85	-0.13428
53.9	-0.13428
53.95	-0.12207
54	-0.10681
54.05	-0.11902
54.1	-0.12817
54.15	-0.14648
54.2	-0.13123
54.25	-0.13428
54.3	-0.12817
54.35	-0.14648
54.4	-0.14343
54.45	-0.10986
54.5	-0.10376
54.55	-0.10071
54.6	-0.10071
54.65	-0.0946
54.7	-0.10376
54.75	-0.0946
54.8	-0.10376
54.85	-0.0885
54.9	-0.07629
54.95	-0.0885
55	-0.10376
55.05	-0.10681
55.1	-0.08545
55.15	-0.09766
55.2	-0.11902
55.25	-0.13123
55.3	-0.12512
55.35	-0.10071
55.4	-0.08545
55.45	-0.10071
55.5	-0.11597
55.55	-0.09155
55.6	-0.10681
55.65	-0.10681
55.7	-0.10071
55.75	-0.09766
55.8	-0.10071
55.85	-0.0946
55.9	-0.10681
55.95	-0.10376
56	-0.07324
56.05	-0.09766
56.1	-0.10986
56.15	-0.11597
56.2	-0.10681
56.25	-0.06714
56.3	-0.07629
56.35	-0.09766
56.4	-0.10376
56.45	-0.09766
56.5	-0.10376
56.55	-0.0824
56.6	-0.10071
56.65	-0.09155
56.7	-0.0946
56.75	-0.10376
56.8	-0.10986
56.85	-0.09766
56.9	-0.10376
56.95	-0.11597
57	-0.12207
57.05	-0.14343
57.1	-0.10986
57.15	-0.10681
57.2	-0.12207
57.25	-0.12512
57.3	-0.12817
57.35	-0.11292
57.4	-0.08545
57.45	-0.10071
57.5	-0.12512
57.55	-0.11292
57.6	-0.12207
57.65	-0.13123
57.7	-0.10986
57.75	-0.11292
57.8	-0.10376
57.85	-0.10376
57.9	-0.11902
57.95	-0.12817
58	-0.10071
58.05	-0.11292
58.1	-0.12512
58.15	-0.12817
58.2	-0.13733
58.25	-0.11292
58.3	-0.11902
58.35	-0.13733
58.4	-0.15259
58.45	-0.13428
58.5	-0.15259
58.55	-0.14648
58.6	-0.14954
58.65	-0.15564
58.7	-0.15259
58.75	-0.15869
58.8	-0.16785
58.85	-0.18005
58.9	-0.15564
58.95	-0.15259
59	-0.15564
59.05	-0.15869
59.1	-0.14648
59.15	-0.14038
59.2	-0.14343
59.25	-0.16174
59.3	-0.177
59.35	-0.15259
59.4	-0.16174
59.45	-0.17395
59.5	-0.16479
59.55	-0.14954
59.6	-0.14954
59.65	-0.14343
59.7	-0.14954
59.75	-0.15869
59.8	-0.13428
59.85	-0.13733
59.9	-0.16785
59.95	-0.16174
60	-0.16479
60.05	-0.15869
60.1	-0.14038
60.15	-0.14038
60.2	-0.14038
60.25	-0.10071
60.3	-0.10071
60.35	-0.10681
60.4	-0.10376
60.45	-0.09766
60.5	-0.0946
60.55	-0.10071
60.6	-0.10986
60.65	-0.11292
60.7	-0.08545
60.75	-0.08545
60.8	-0.09155
60.85	-0.11597
60.9	-0.10681
60.95	-0.09766
61	-0.09155
61.05	-0.07629
61.1	-0.08545
61.15	-0.07324
61.2	-0.07019
61.25	-0.06104
61.3	-0.07629
61.35	-0.05188
61.4	-0.05798
61.45	-0.07935
61.5	-0.07935
61.55	-0.06409
61.6	-0.05188
61.65	-0.04272
61.7	-0.05188
61.75	-0.0885
61.8	-0.07629
61.85	-0.06409
61.9	-0.06409
61.95	-0.07019
62	-0.07629
62.05	-0.06104
62.1	-0.06104
62.15	-0.05188
62.2	-0.04578
62.25	-0.04272
62.3	-0.05188
62.35	-0.05188
62.4	-0.05798
62.45	-0.06104
62.5	-0.03662
62.55	-0.04578
62.6	-0.06714
62.65	-0.07019
62.7	-0.04578
62.75	-0.06104
62.8	-0.05493
62.85	-0.06714
62.9	-0.08545
62.95	-0.06104
63	-0.04578
63.05	-0.03052
63.1	-0.05493
63.15	-0.05188
63.2	-0.06409
63.25	-0.07629
63.3	-0.07935
63.35	-0.04883
63.4	-0.04578
63.45	-0.06714
63.5	-0.07935
63.55	-0.07324
63.6	-0.05493
63.65	-0.06409
63.7	-0.07019
63.75	-0.09155
63.8	-0.09155
63.85	-0.07629
63.9	-0.05188
63.95	-0.05798
64	-0.0824
64.05	-0.05798
64.1	-0.07629
64.15	-0.09155
64.2	-0.0824
64.25	-0.0824
64.3	-0.0946
64.35	-0.10071
64.4	-0.0946
64.45	-0.0885
64.5	-0.06104
64.55	-0.07324
64.6	-0.07935
64.65	-0.10376
64.7	-0.10681
64.75	-0.07629
64.8	-0.0885
64.85	-0.10681
64.9	-0.10376
64.95	-0.0824
65	-0.09155
65.05	-0.07019
65.1	-0.07629
65.15	-0.0946
65.2	-0.09766
65.25	-0.10376
65.3	-0.11597
65.35	-0.10376
65.4	-0.07629
65.45	-0.0885
65.5	-0.0946
65.55	-0.10986
65.6	-0.10986
65.65	-0.0946
65.7	-0.10071
65.75	-0.10376
65.8	-0.10681
65.85	-0.08545
65.9	-0.08545
65.95	-0.08545
66	-0.10986
66.05	-0.10986
66.1	-0.10681
66.15	-0.11597
66.2	-0.11902
66.25	-0.10986
66.3	-0.11292
66.35	-0.11902
66.4	-0.12512
66.45	-0.12207
66.5	-0.0946
66.55	-0.0885
66.6	-0.10071
66.65	-0.07935
66.7	-0.09766
66.75	-0.09155
66.8	-0.0946
66.85	-0.10071
66.9	-0.10681
66.95	-0.10071
67	-0.10071
67.05	-0.08545
67.1	-0.09155
67.15	-0.09766
67.2	-0.08545
67.25	-0.09155
67.3	-0.07324
67.35	-0.08545
67.4	-0.10376
67.45	-0.10376
67.5	-0.09155
67.55	-0.09155
67.6	-0.0824
67.65	-0.07935
67.7	-0.08545
67.75	-0.07324
67.8	-0.06409
67.85	-0.06409
67.9	-0.06714
67.95	-0.07324
68	-0.07324
68.05	-0.06714
68.1	-0.07019
68.15	-0.06409
68.2	-0.06409
68.25	-0.07629
68.3	-0.05188
68.35	-0.04272
68.4	-0.05188
68.45	-0.05493
68.5	-0.05493
68.55	-0.06104
68.6	-0.06409
68.65	-0.06104
68.7	-0.06104
68.75	-0.04272
68.8	-0.04883
68.85	-0.05493
68.9	-0.05188
68.95	-0.03967
69	-0.03052
69.05	-0.05493
69.1	-0.06714
69.15	-0.07019
69.2	-0.03967
69.25	-0.03357
69.3	-0.03967
69.35	-0.05798
69.4	-0.05188
69.45	-0.04272
69.5	-0.04578
69.55	-0.01831
69.6	-0.01526
69.65	0
69.7	-0.01221
69.75	-0.01526
69.8	-0.03357
69.85	-0.01831
69.9	-0.03052
69.95	-0.05798
70	-0.05798
70.05	-0.05493
70.1	-0.03662
70.15	-0.03662
70.2	-0.06409
70.25	-0.08545
70.3	-0.07324
70.35	-0.05798
70.4	-0.04272
70.45	-0.05188
70.5	-0.06104
70.55	-0.06409
70.6	-0.07629
70.65	-0.07629
70.7	-0.07019
70.75	-0.0824
70.8	-0.0946
70.85	-0.10681
70.9	-0.13428
70.95	-0.12817
71	-0.0885
71.05	-0.10071
71.1	-0.10986
71.15	-0.11292
71.2	-0.10681
71.25	-0.09766
71.3	-0.10071
71.35	-0.11597
71.4	-0.14648
71.45	-0.14343
71.5	-0.14343
71.55	-0.13123
71.6	-0.14648
71.65	-0.13733
71.7	-0.12817
71.75	-0.14343
71.8	-0.14954
71.85	-0.13428
71.9	-0.11902
71.95	-0.13733
72	-0.14038
72.05	-0.16174
72.1	-0.14038
72.15	-0.13428
72.2	-0.13733
72.25	-0.15869
72.3	-0.16785
72.35	-0.14648
72.4	-0.13428
72.45	-0.14343
72.5	-0.15869
72.55	-0.12817
72.6	-0.14343
72.65	-0.13733
72.7	-0.13123
72.75	-0.12817
72.8	-0.11597
72.85	-0.11597
72.9	-0.13428
72.95	-0.13428
73	-0.11597
73.05	-0.11597
73.1	-0.12512
73.15	-0.14343
73.2	-0.14038
73.25	-0.11597
73.3	-0.12207
73.35	-0.13123
73.4	-0.12512
73.45	-0.11597
73.5	-0.12512
73.55	-0.12512
73.6	-0.14038
73.65	-0.14343
73.7	-0.12512
73.75	-0.13123
73.8	-0.11902
73.85	-0.12512
73.9	-0.10681
73.95	-0.11597
74	-0.13123
74.05	-0.13733
74.1	-0.10681
74.15	-0.10986
74.2	-0.09766
74.25	-0.0885
74.3	-0.10071
74.35	-0.0885
74.4	-0.0946
74.45	-0.10376
74.5	-0.11597
74.55	-0.10376
74.6	-0.10376
74.65	-0.10071
74.7	-0.11902
74.75	-0.12512
74.8	-0.0885
74.85	-0.09766
74.9	-0.10986
74.95	-0.10986
75	-0.11597
75.05	-0.11292
75.1	-0.09766
75.15	-0.11292
75.2	-0.12207
75.25	-0.09766
75.3	-0.10376
75.35	-0.11292
75.4	-0.10681
75.45	-0.10681
75.5	-0.0946
75.55	-0.09766
75.6	-0.11597
75.65	-0.11902
75.7	-0.0885
75.75	-0.0885
75.8	-0.09766
75.85	-0.11597
75.9	-0.10986
75.95	-0.10986
76	-0.09766
76.05	-0.10071
76.1	-0.10376
76.15	-0.07935
76.2	-0.0824
76.25	-0.0885
76.3	-0.0946
76.35	-0.07935
76.4	-0.0946
76.45	-0.10681
76.5	-0.11902
76.55	-0.11597
76.6	-0.0885
76.65	-0.0885
76.7	-0.11902
76.75	-0.12817
76.8	-0.11597
76.85	-0.10071
76.9	-0.08545
76.95	-0.09766
77	-0.11597
77.05	-0.10071
77.1	-0.10376
77.15	-0.11597
77.2	-0.10681
77.25	-0.0946
77.3	-0.11292
77.35	-0.11292
77.4	-0.11597
77.45	-0.11597
77.5	-0.0885
77.55	-0.0946
77.6	-0.11902
77.65	-0.12817
77.7	-0.10376
77.75	-0.10071
77.8	-0.09766
77.85	-0.11292
77.9	-0.12207
77.95	-0.10376
78	-0.10376
78.05	-0.0946
78.1	-0.11597
78.15	-0.0946
78.2	-0.11597
78.25	-0.11292
78.3	-0.10986
78.35	-0.10681
78.4	-0.11597
78.45	-0.13123
78.5	-0.15564
78.55	-0.16785
78.6	-0.13123
78.65	-0.13733
78.7	-0.15869
78.75	-0.16785
78.8	-0.16479
78.85	-0.16479
78.9	-0.14038
78.95	-0.14343
79	-0.17395
79.05	-0.16174
79.1	-0.1709
79.15	-0.18616
79.2	-0.1709
79.25	-0.15259
79.3	-0.15259
79.35	-0.14954
79.4	-0.15259
79.45	-0.14954
79.5	-0.11902
79.55	-0.12817
79.6	-0.14038
79.65	-0.1709
79.7	-0.16785
79.75	-0.14343
79.8	-0.14648
79.85	-0.15259
79.9	-0.15869
79.95	-0.14343
80	-0.14343
80.05	-0.13123
80.1	-0.14343
80.15	-0.13123
80.2	-0.12207
80.25	-0.12512
80.3	-0.12512
80.35	-0.12207
80.4	-0.10986
80.45	-0.11902
80.5	-0.11597
80.55	-0.14038
80.6	-0.12512
80.65	-0.12817
80.7	-0.11902
80.75	-0.12817
80.8	-0.11902
80.85	-0.0885
80.9	-0.0885
80.95	-0.0946
81	-0.08545
81.05	-0.08545
81.1	-0.09766
81.15	-0.09155
81.2	-0.0885
81.25	-0.0946
81.3	-0.06714
81.35	-0.06714
81.4	-0.08545
81.45	-0.07935
81.5	-0.05798
81.55	-0.06104
81.6	-0.06104
81.65	-0.06714
81.7	-0.07324
81.75	-0.06409
81.8	-0.07935
81.85	-0.0824
81.9	-0.07629
81.95	-0.05798
82	-0.03967
82.05	-0.05188
82.1	-0.07324
82.15	-0.05798
82.2	-0.03967
82.25	-0.05798
82.3	-0.04883
82.35	-0.06104
82.4	-0.05188
82.45	-0.05188
82.5	-0.04578
82.55	-0.04578
82.6	-0.05798
82.65	-0.05188
82.7	-0.06104
82.75	-0.06104
82.8	-0.06409
82.85	-0.03357
82.9	-0.05493
82.95	-0.06409
83	-0.06104
83.05	-0.05493
83.1	-0.04578
83.15	-0.01831
83.2	-0.03662
83.25	-0.06409
83.3	-0.03967
83.35	-0.04272
83.4	-0.04883
83.45	-0.06714
83.5	-0.07935
83.55	-0.0946
83.6	-0.09155
83.65	-0.0824
83.7	-0.07935
83.75	-0.07935
83.8	-0.0885
83.85	-0.07324
83.9	-0.0824
83.95	-0.08545
84	-0.05798
84.05	-0.07019
84.1	-0.0885
84.15	-0.09155
84.2	-0.07935
84.25	-0.07935
84.3	-0.07629
84.35	-0.07019
84.4	-0.07935
84.45	-0.0824
84.5	-0.07629
84.55	-0.04883
84.6	-0.07019
84.65	-0.07629
84.7	-0.0885
84.75	-0.09155
84.8	-0.0885
84.85	-0.0824
84.9	-0.0824
84.95	-0.10681
85	-0.11292
85.05	-0.10071
85.1	-0.07324
85.15	-0.07324
85.2	-0.07629
85.25	-0.10376
85.3	-0.10071
85.35	-0.10071
85.4	-0.09155
85.45	-0.0946
85.5	-0.10071
85.55	-0.09766
85.6	-0.10681
85.65	-0.10681
85.7	-0.10376
85.75	-0.08545
85.8	-0.0885
85.85	-0.10071
85.9	-0.09766
85.95	-0.0946
86	-0.07019
86.05	-0.07324
86.1	-0.0946
86.15	-0.10681
86.2	-0.0885
86.25	-0.09155
86.3	-0.09766
86.35	-0.11292
86.4	-0.11902
86.45	-0.10376
86.5	-0.11292
86.55	-0.0946
86.6	-0.10071
86.65	-0.0885
86.7	-0.09766
86.75	-0.09155
86.8	-0.09155
86.85	-0.0946
86.9	-0.07324
86.95	-0.0946
87	-0.10376
87.05	-0.11292
87.1	-0.08545
87.15	-0.07935
87.2	-0.08545
87.25	-0.10986
87.3	-0.11292
87.35	-0.10986
87.4	-0.0946
87.45	-0.10376
87.5	-0.10376
87.55	-0.09155
87.6	-0.0946
87.65	-0.07935
87.7	-0.0824
87.75	-0.07019
87.8	-0.06409
87.85	-0.06714
87.9	-0.07629
87.95	-0.07935
88	-0.06714
88.05	-0.06104
88.1	-0.07019
88.15	-0.09155
88.2	-0.08545
88.25	-0.07935
88.3	-0.08545
88.35	-0.07935
88.4	-0.07935
88.45	-0.05798
88.5	-0.03967
88.55	-0.05188
88.6	-0.06714
88.65	-0.04883
88.7	-0.03662
88.75	-0.04578
88.8	-0.03662
88.85	-0.06104
88.9	-0.03357
88.95	-0.02441
89	-0.03357
89.05	-0.04578
89.1	-0.02441
89.15	-0.02747
89.2	-0.02136
89.25	-0.02136
89.3	-0.03967
89.35	-0.01831
89.4	-0.03052
89.45	-0.04883
89.5	-0.06104
89.55	-0.03662
89.6	-0.04272
89.65	-0.03357
89.7	-0.04272
89.75	-0.06409
89.8	-0.04272
89.85	-0.03052
89.9	-0.03052
89.95	-0.03662
90	-0.02136
90.05	-0.02747
90.1	-0.03357
90.15	-0.04578
90.2	-0.04578
90.25	-0.04272
90.3	-0.06714
90.35	-0.07629
90.4	-0.09155
90.45	-0.0824
90.5	-0.06409
90.55	-0.0885
90.6	-0.10986
90.65	-0.10681
90.7	-0.0824
90.75	-0.0885
90.8	-0.0885
90.85	-0.10376
90.9	-0.11292
90.95	-0.10376
91	-0.09766
91.05	-0.10376
91.1	-0.11902
91.15	-0.10986
91.2	-0.11902
91.25	-0.12512
91.3	-0.12207
91.35	-0.09766
91.4	-0.11292
91.45	-0.12817
91.5	-0.12817
91.55	-0.13428
91.6	-0.11902
91.65	-0.11902
91.7	-0.13733
91.75	-0.16174
91.8	-0.13428
91.85	-0.13123
91.9	-0.12207
91.95	-0.13428
92	-0.14343
92.05	-0.14343
92.1	-0.14038
92.15	-0.13733
92.2	-0.13428
92.25	-0.13123
92.3	-0.13428
92.35	-0.15259
92.4	-0.15869
92.45	-0.12512
92.5	-0.10681
92.55	-0.12207
92.6	-0.13733
92.65	-0.14648
92.7	-0.12817
92.75	-0.11292
92.8	-0.10376
92.85	-0.13733
92.9	-0.14648
92.95	-0.12817
93	-0.14038
93.05	-0.13428
93.1	-0.13733
93.15	-0.13428
93.2	-0.14038
93.25	-0.14648
93.3	-0.14038
93.35	-0.11902
93.4	-0.10681
93.45	-0.10681
93.5	-0.11902
93.55	-0.13428
93.6	-0.0885
93.65	-0.09766
93.7	-0.10376
93.75	-0.11597
93.8	-0.11597
93.85	-0.11597
93.9	-0.10376
93.95	-0.10681
94	-0.12512
94.05	-0.11292
94.1	-0.11597
94.15	-0.12207
94.2	-0.12207
94.25	-0.10071
94.3	-0.09766
94.35	-0.10376
94.4	-0.10681
94.45	-0.10071
94.5	-0.07935
94.55	-0.09766
94.6	-0.10681
94.65	-0.13123
94.7	-0.12817
94.75	-0.10376
94.8	-0.10681
94.85	-0.11902
94.9	-0.10986
94.95	-0.10376
95	-0.11292
95.05	-0.10681
95.1	-0.11292
95.15	-0.11292
95.2	-0.09766
95.25	-0.10376
95.3	-0.10681
95.35	-0.10986
95.4	-0.09155
95.45	-0.0946
95.5	-0.09155
95.55	-0.10986
95.6	-0.10071
95.65	-0.09766
95.7	-0.10986
95.75	-0.11292
95.8	-0.10986
95.85	-0.10986
95.9	-0.10376
95.95	-0.11292
96	-0.12207
96.05	-0.10376
96.1	-0.11902
96.15	-0.11597
96.2	-0.11902
96.25	-0.12512
96.3	-0.09766
96.35	-0.09155
96.4	-0.09766
96.45	-0.10376
96.5	-0.09155
96.55	-0.10986
96.6	-0.11902
96.65	-0.12512
96.7	-0.12817
96.75	-0.11597
96.8	-0.11597
96.85	-0.12817
96.9	-0.11597
96.95	-0.0946
97	-0.10376
97.05	-0.12207
97.1	-0.13733
97.15	-0.13733
97.2	-0.10376
97.25	-0.10071
97.3	-0.0946
97.35	-0.10681
97.4	-0.09766
97.45	-0.10681
97.5	-0.09766
97.55	-0.10986
97.6	-0.11292
97.65	-0.10376
97.7	-0.10681
97.75	-0.10681
97.8	-0.10986
97.85	-0.0946
97.9	-0.11902
97.95	-0.13428
98	-0.15869
98.05	-0.15259
98.1	-0.14038
98.15	-0.14038
98.2	-0.14648
98.25	-0.14648
98.3	-0.12207
98.35	-0.12512
98.4	-0.10986
98.45	-0.13123
98.5	-0.14343
98.55	-0.14038
98.6	-0.15869
98.65	-0.16785
98.7	-0.15564
98.75	-0.14038
98.8	-0.15869
98.85	-0.15564
98.9	-0.16174
98.95	-0.14954
99	-0.12207
99.05	-0.14954
99.1	-0.1709
99.15	-0.17395
99.2	-0.15564
99.25	-0.15869
99.3	-0.15869
99.35	-0.19226
99.4	-0.19531
99.45	-0.1709
99.5	-0.16785
99.55	-0.13733
99.6	-0.13733
99.65	-0.14038
99.7	-0.15259
99.75	-0.14954
99.8	-0.15869
[truncated: 98,004 more rows]

## Sheet: Figure 6 C ii right
Con	CMUS
5.04	0.45
4.97	2.77
6.44	1.2
5.11	2.46
2.24	1.14
3.84	0.8
4.07	3.73
3.68	2.46
3.34	1.2
1.76	1.35
2	1.04
2.43	0.98
1.17	1.28
1.06	1.69
0.56	1.6
1.01	1
1.18	0.8
1.01	1.13
4.21	0.87
3.34	1.09
3.14	0.87
1.66	1.22
5.4	0.55
2.48	0.38
2.31	1.13
1.82	1.84
2.3	0.67
2.09	0.62
2.43	2.34
2.16	1.9
3.07	1.72
2	1.63
2.34	1.46
2.42	1.36
4.14	1.27
2.07	1.22
2.93	1.13
2.29	0.75
3.54	1.21
4.31	1.35
3.67	1.67
2.45	2.27
3.17	2.43
2.77	0.33
2.33	0.75
4.5	1.37
3.48	0.29
3.02	0.37
4.36	1.08
2.58	0.95
3.95	0.48
2	0.81
2.24	1.31
	0.53
	0.46
	0.27
	0.53
	1.98
	1.8
	1.7
	1.63
	1.44
	1.25
	1.25
	1.23
	1.19
	1.07
	0.55
