# Supplementary material for: The cation channel mechanisms of subthreshold inward depolarizing currents in the mice VTA dopaminergic neurons and their roles in the chronic-stress-induced depression-like behavior
Source: eLife. 2024 Dec 6;12:RP88319. doi: 10.7554/eLife.88319 (PMC11623934; doi:10.7554/eLife.88319)
Supplement: Figure 6—source data 5. [file elife-88319-fig6-data5.xlsx]

## Sheet: Figure 6 E i
	Figure 6 E i up							Figure 6 E i bottom
	Con
	acsf			2-APB
	Time(ms)	Voltage (mv)		Time(ms)	Voltage (mv)			Time(min)	Firing rate(Hz)
	0	-0.10681		0	-0.12512			0.17	2.94118
	0.10938	-0.10071		0.125	-0.11597			0.34	3.82353
	0.20313	-0.13733		0.1875	-0.13428			0.51	4.21569
	0.29688	-0.11597		0.3125	-0.14343			0.68	4.21569
	0.40625	-0.10986		0.4375	-0.14038			0.85	3.92157
	0.5	-0.11292		0.5	-0.12207			1.02	4.11765
	0.60938	-0.10681		0.625	-0.09766			1.19	3.92157
	0.70313	-0.11597		0.6875	-0.12817			1.36	4.11765
	0.79688	-0.11597		0.8125	-0.11597			1.53	4.41176
	0.90625	-0.09155		0.9375	-0.10986			1.7	4.11765
	1	-0.0946		1	-0.12207			1.87	4.31373
	1.10938	-0.10071		1.125	-0.12207			2.04	4.21569
	1.20313	-0.11902		1.1875	-0.0946			2.21	4.21569
	1.29688	-0.10986		1.3125	-0.08545			2.38	4.41176
	1.40625	-0.11597		1.4375	-0.07324			2.55	4.41176
	1.5	-0.12512		1.5	-0.07629			2.72	4.41176
	1.60938	-0.14038		1.625	-0.07629			2.89	4.31373
	1.70313	-0.10376		1.6875	-0.0824			3.06	4.11765
	1.79688	-0.10376		1.8125	-0.05798			3.23	4.60784
	1.90625	-0.10681		1.9375	-0.04578			3.4	4.31373
	2	-0.13123		2	-0.04578			3.57	4.5098
	2.10938	-0.15259		2.125	-0.04578			3.74	4.31373
	2.20313	-0.12512		2.1875	-0.05493			3.91	4.41176
	2.29688	-0.12207		2.3125	-0.05188			4.08	5.09804
	2.40625	-0.11292		2.4375	-0.04272			4.25	5
	2.5	-0.0824		2.5	-0.05798			4.42	4.90196
	2.60938	-0.10681		2.625	-0.04272			4.59	5.19608
	2.70313	-0.0885		2.6875	-0.03662			4.76	5.29412
	2.79688	-0.09155		2.8125	-0.02441			4.93	4.31373
	2.90625	-0.0885		2.9375	-0.06409			5.1	5.39216
	3	-0.12817		3	-0.05188			5.27	4.60784
	3.10938	-0.11292		3.125	-0.03967			5.44	4.60784
	3.20313	-0.0824		3.1875	-0.03052			5.61	5.09804
	3.29688	-0.0946		3.3125	-0.0061			5.78	5.39216
	3.40625	-0.11292		3.4375	-0.01831			5.95	4.70588
	3.5	-0.09766		3.5	-0.03967			6.12	5.19608
	3.60938	-0.05798		3.625	-0.03357			6.29	4.80392
	3.70313	-0.05798		3.6875	-0.04272			6.46	3.23529
	3.79688	-0.09155		3.8125	-0.06104			6.63	0.4902
	3.90625	-0.08545		3.9375	-0.01831			6.8	0.78431
	4	-0.11902		4	-0.01831			6.97	1.07843
	4.10938	-0.08545		4.125	-0.04883			7.14	0.29412
	4.20313	-0.06714		4.1875	-0.04578			7.31	2.05882
	4.29688	-0.07324		4.3125	-0.03052			7.48	1.76471
	4.40625	-0.06714		4.4375	-0.06409			7.65	0.78431
	4.5	-0.07935		4.5	-0.06714			7.82	0.09804
	4.60938	-0.07935		4.625	-0.04578			7.99	0
	4.70313	-0.0824		4.6875	-0.02747			8.16	0
	4.79688	-0.07019		4.8125	-0.04272			8.33	0
	4.90625	-0.07935		4.9375	-0.05798			8.5	0
	5	-0.10986		5	-0.04578			8.67	0
	5.10938	-0.0946		5.125	-0.06104			8.84	0
	5.20313	-0.10071		5.1875	-0.05798			9.01	0
	5.29688	-0.09766		5.3125	-0.04272			9.18	0
	5.40625	-0.10376		5.4375	-0.03967			9.35	0
	5.5	-0.08545		5.5	-0.03052			9.52	0
	5.60938	-0.09155		5.625	-0.05188			9.69	0
	5.70313	-0.10071		5.6875	-0.05493			9.86	0
	5.79688	-0.0885		5.8125	-0.05188			10.03	0
	5.90625	-0.04883		5.9375	-0.07019			10.2	0
	6	-0.04883		6	-0.05798			10.37	0
	6.10938	-0.07324		6.125	-0.05188			10.54	0
	6.20313	-0.07324		6.1875	-0.05493			10.71	0
	6.29688	-0.07324		6.3125	-0.07019			10.88	0
	6.40625	-0.03662		6.4375	-0.06409			11.05	0
	6.5	-0.05188		6.5	-0.07935			11.22	0
	6.60938	-0.08545		6.625	-0.07935			11.39	0
	6.70313	-0.04578		6.6875	-0.05798			11.56	0
	6.79688	-0.07019		6.8125	-0.07324			11.73	0
	6.90625	-0.07324		6.9375	-0.0824			11.9	0
	7	-0.07935		7	-0.06104			12.07	0
	7.10938	-0.07935		7.125	-0.07629			12.24	0
	7.20313	-0.07324		7.1875	-0.06409			12.41	0
	7.29688	-0.11292		7.3125	-0.06714			12.58	0
	7.40625	-0.10071		7.4375	-0.08545			12.75	0
	7.5	-0.12512		7.5	-0.07629			12.92	0.58824
	7.60938	-0.12207		7.625	-0.10071			13.09	1.56863
	7.70313	-0.13123		7.6875	-0.07629			13.26	1.56863
	7.79688	-0.13123		7.8125	-0.06714			13.43	2.2549
	7.90625	-0.10986		7.9375	-0.08545			13.6	1.86275
	8	-0.0946		8	-0.07324			13.77	2.35294
	8.10938	-0.13428		8.125	-0.08545			13.94	2.45098
	8.20313	-0.12817		8.1875	-0.06409			14.11	2.15686
	8.29688	-0.12207		8.3125	-0.04578			14.28	2.35294
	8.40625	-0.0946		8.4375	-0.06714			14.45	2.7451
	8.5	-0.10986		8.5	-0.07629			14.62	2.94118
	8.60938	-0.11597		8.625	-0.05493			14.79	2.94118
	8.70313	-0.12817		8.6875	-0.04272			14.96	2.84314
	8.79688	-0.11902		8.8125	-0.04578			15.13	2.7451
	8.90625	-0.11292		8.9375	-0.06409			15.3	3.43137
	9	-0.09155		9	-0.05493			15.47	3.52941
	9.10938	-0.0946		9.125	-0.04578			15.64	3.03922
	9.20313	-0.09155		9.1875	-0.05188			15.81	3.03922
	9.29688	-0.0885		9.3125	-0.02747			15.98	3.23529
	9.40625	-0.11292		9.4375	-0.03357			16.15	3.13725
	9.5	-0.08545		9.5	-0.01831			16.32	2.7451
	9.60938	-0.06714		9.625	-0.02136			16.49	3.52941
	9.70313	-0.0885		9.6875	0.00916			16.66	2.7451
	9.79688	-0.07324		9.8125	0.00305			16.83	2.45098
	9.90625	-0.0946		9.9375	0			17	3.23529
	10	-0.05798		10	-0.00305
	10.1094	-0.01526		10.125	-0.01831
	10.2031	-0.02136		10.1875	0.01831
	10.2969	-0.02747		10.3125	0
	10.4062	-0.01221		10.4375	-0.03052
	10.5	-0.03052		10.5	-0.03357
	10.6094	-0.06714		10.625	-0.02136
	10.7031	-0.03357		10.6875	-0.02441
	10.7969	-0.05493		10.8125	-0.03967
	10.9062	-0.04272		10.9375	-0.02136
	11	-0.04883		11	-0.02441
	11.1094	-0.02441		11.125	-0.01831
	11.2031	-0.03052		11.1875	-0.03662
	11.2969	-0.04883		11.3125	-0.06409
	11.4062	-0.04272		11.4375	-0.07324
	11.5	-0.05493		11.5	-0.05188
	11.6094	-0.04883		11.625	-0.0885
	11.7031	-0.03052		11.6875	-0.07629
	11.7969	-0.02136		11.8125	-0.06714
	11.9062	-0.03052		11.9375	-0.0885
	12	-0.03357		12	-0.0946
	12.1094	-0.04272		12.125	-0.10376
	12.2031	-0.03662		12.1875	-0.11902
	12.2969	-0.0061		12.3125	-0.12817
	12.4062	-0.01526		12.4375	-0.13123
	12.5	-0.00916		12.5	-0.11902
	12.6094	-0.01221		12.625	-0.11597
	12.7031	-0.02747		12.6875	-0.09155
	12.7969	-0.03357		12.8125	-0.12512
	12.9062	-0.04883		12.9375	-0.11597
	13	-0.04578		13	-0.10681
	13.1094	-0.05493		13.125	-0.11292
	13.2031	-0.04272		13.1875	-0.11597
	13.2969	-0.04883		13.3125	-0.11902
	13.4062	-0.05188		13.4375	-0.10681
	13.5	-0.04883		13.5	-0.0824
	13.6094	-0.05188		13.625	-0.09155
	13.7031	-0.03662		13.6875	-0.0885
	13.7969	-0.03662		13.8125	-0.10681
	13.9062	-0.04883		13.9375	-0.10681
	14	-0.04272		14	-0.09155
	14.1094	-0.04883		14.125	-0.10986
	14.2031	-0.06409		14.1875	-0.0885
	14.2969	-0.04578		14.3125	-0.09766
	14.4062	-0.06104		14.4375	-0.0824
	14.5	-0.05798		14.5	-0.13428
	14.6094	-0.06714		14.625	-0.10071
	14.7031	-0.06409		14.6875	-0.07629
	14.7969	-0.06714		14.8125	-0.10071
	14.9062	-0.04883		14.9375	-0.0885
	15	-0.06104		15	-0.09766
	15.1094	-0.05188		15.125	-0.09155
	15.2031	-0.08545		15.1875	-0.09155
	15.2969	-0.10071		15.3125	-0.10681
	15.4062	-0.06104		15.4375	-0.10681
	15.5	-0.05493		15.5	-0.12512
	15.6094	-0.07629		15.625	-0.09155
	15.7031	-0.07019		15.6875	-0.0946
	15.7969	-0.06409		15.8125	-0.09766
	15.9062	-0.08545		15.9375	-0.0824
	16	-0.05493		16	-0.0946
	16.1094	-0.07019		16.125	-0.08545
	16.2031	-0.06409		16.1875	-0.08545
	16.2969	-0.06714		16.3125	-0.07019
	16.4062	-0.05798		16.4375	-0.07629
	16.5	-0.07324		16.5	-0.06714
	16.6094	-0.05493		16.625	-0.05798
	16.7031	-0.0824		16.6875	-0.07324
	16.7969	-0.07019		16.8125	-0.09766
	16.9062	-0.07324		16.9375	-0.10071
	17	-0.07019		17	-0.0946
	17.1094	-0.05493		17.125	-0.0885
	17.2031	-0.03052		17.1875	-0.09766
	17.2969	-0.06714		17.3125	-0.10986
	17.4062	-0.07019		17.4375	-0.07629
	17.5	-0.05493		17.5	-0.08545
	17.6094	-0.03967		17.625	-0.07019
	17.7031	-0.0061		17.6875	-0.05798
	17.7969	-0.01831		17.8125	-0.09155
	17.9062	-0.02441		17.9375	-0.09766
	18	-0.04272		18	-0.07629
	18.1094	-0.03357		18.125	-0.07324
	18.2031	-0.01221		18.1875	-0.06409
	18.2969	-0.01831		18.3125	-0.07935
	18.4062	-0.0061		18.4375	-0.07935
	18.5	-0.03052		18.5	-0.06104
	18.6094	-0.0061		18.625	-0.07019
	18.7031	-0.03357		18.6875	-0.06104
	18.7969	-0.03967		18.8125	-0.0946
	18.9062	-0.04578		18.9375	-0.0946
	19	-0.02136		19	-0.0946
	19.1094	-0.03662		19.125	-0.10376
	19.2031	-0.03052		19.1875	-0.13733
	19.2969	-0.03052		19.3125	-0.13733
	19.4062	-0.06714		19.4375	-0.14038
	19.5	-0.10376		19.5	-0.15564
	19.6094	-0.07019		19.625	-0.16479
	19.7031	-0.06714		19.6875	-0.177
	19.7969	-0.0824		19.8125	-0.13123
	19.9062	-0.09155		19.9375	-0.13428
	20	-0.10071		20	-0.12512
	20.1094	-0.0946		20.125	-0.14343
	20.2031	-0.10681		20.1875	-0.12817
	20.2969	-0.08545		20.3125	-0.11597
	20.4062	-0.06714		20.4375	-0.13428
	20.5	-0.0885		20.5	-0.11902
	20.6094	-0.09155		20.625	-0.13733
	20.7031	-0.10071		20.6875	-0.10071
	20.7969	-0.11292		20.8125	-0.12817
	20.9062	-0.11597		20.9375	-0.12207
	21	-0.10681		21	-0.10986
	21.1094	-0.10376		21.125	-0.0946
	21.2031	-0.0824		21.1875	-0.0885
	21.2969	-0.08545		21.3125	-0.0824
	21.4062	-0.0946		21.4375	-0.11292
	21.5	-0.07629		21.5	-0.10071
	21.6094	-0.09766		21.625	-0.06714
	21.7031	-0.06409		21.6875	-0.07019
	21.7969	-0.10986		21.8125	-0.04883
	21.9062	-0.12817		21.9375	-0.06409
	22	-0.12512		22	-0.06104
	22.1094	-0.12817		22.125	-0.06104
	22.2031	-0.15259		22.1875	-0.05188
	22.2969	-0.13123		22.3125	-0.03967
	22.4062	-0.09766		22.4375	-0.05188
	22.5	-0.07629		22.5	-0.03357
	22.6094	-0.09155		22.625	-0.04883
	22.7031	-0.0824		22.6875	-0.03662
	22.7969	-0.10986		22.8125	-0.03967
	22.9062	-0.0885		22.9375	-0.02136
	23	-0.0946		23	-0.02747
	23.1094	-0.11292		23.125	-0.03967
	23.2031	-0.07324		23.1875	-0.03967
	23.2969	-0.0824		23.3125	-0.03052
	23.4062	-0.07935		23.4375	-0.03662
	23.5	-0.08545		23.5	-0.03052
	23.6094	-0.0824		23.625	-0.01526
	23.7031	-0.0885		23.6875	-0.02136
	23.7969	-0.10681		23.8125	-0.02747
	23.9062	-0.10681		23.9375	-0.05188
	24	-0.13123		24	-0.03357
	24.1094	-0.07935		24.125	-0.02441
	24.2031	-0.08545		24.1875	-0.06409
	24.2969	-0.0824		24.3125	-0.05188
	24.4062	-0.10071		24.4375	-0.07019
	24.5	-0.09766		24.5	-0.05798
	24.6094	-0.07629		24.625	-0.06714
	24.7031	-0.07935		24.6875	-0.07324
	24.7969	-0.07629		24.8125	-0.05798
	24.9062	-0.09766		24.9375	-0.03357
	25	-0.07629		25	-0.04272
	25.1094	-0.07324		25.125	-0.03967
	25.2031	-0.07019		25.1875	-0.05493
	25.2969	-0.05798		25.3125	-0.07019
	25.4062	-0.04578		25.4375	-0.03052
	25.5	-0.09766		25.5	-0.03357
	25.6094	-0.12817		25.625	-0.04272
	25.7031	-0.0946		25.6875	-0.05493
	25.7969	-0.10986		25.8125	-0.06104
	25.9062	-0.09766		25.9375	-0.06409
	26	-0.0885		26	-0.05493
	26.1094	-0.06409		26.125	-0.04883
	26.2031	-0.09766		26.1875	-0.03662
	26.2969	-0.0824		26.3125	-0.03357
	26.4062	-0.07935		26.4375	-0.02441
	26.5	-0.0885		26.5	-0.05188
	26.6094	-0.07935		26.625	-0.03662
	26.7031	-0.06714		26.6875	-0.04883
	26.7969	-0.11292		26.8125	-0.06714
	26.9062	-0.11292		26.9375	-0.07935
	27	-0.10681		27	-0.06409
	27.1094	-0.10986		27.125	-0.06409
	27.2031	-0.06714		27.1875	-0.06104
	27.2969	-0.10376		27.3125	-0.07324
	27.4062	-0.10681		27.4375	-0.05798
	27.5	-0.10376		27.5	-0.07019
	27.6094	-0.0946		27.625	-0.10071
	27.7031	-0.0946		27.6875	-0.05188
	27.7969	-0.10071		27.8125	-0.05493
	27.9062	-0.0946		27.9375	-0.06714
	28	-0.14648		28	-0.0824
	28.1094	-0.14343		28.125	-0.08545
	28.2031	-0.11902		28.1875	-0.06104
	28.2969	-0.13123		28.3125	-0.03967
	28.4062	-0.11902		28.4375	-0.06714
	28.5	-0.16174		28.5	-0.07324
	28.6094	-0.10376		28.625	-0.06714
	28.7031	-0.12512		28.6875	-0.06104
	28.7969	-0.14343		28.8125	-0.06104
	28.9062	-0.10681		28.9375	-0.04272
	29	-0.11292		29	-0.03357
	29.1094	-0.0946		29.125	-0.03967
	29.2031	-0.06714		29.1875	-0.04272
	29.2969	-0.07629		29.3125	-0.03052
	29.4062	-0.09766		29.4375	-0.01831
	29.5	-0.07629		29.5	-0.0061
	29.6094	-0.07019		29.625	0.0061
	29.7031	-0.07629		29.6875	0.0061
	29.7969	-0.07019		29.8125	-0.00305
	29.9062	-0.06409		29.9375	-0.01221
	30	-0.06104		30	-0.0061
	30.1094	-0.07629		30.125	0.01221
	30.2031	-0.03662		30.1875	0.01221
	30.2969	-0.05188		30.3125	0
	30.4062	-0.04272		30.4375	-0.02441
	30.5	-0.02136		30.5	0.00916
	30.6094	-0.03662		30.625	0.0061
	30.7031	-0.05188		30.6875	-0.01526
	30.7969	-0.03662		30.8125	-0.00916
	30.9062	-0.03052		30.9375	-0.0061
	31	-0.03967		31	-0.00916
	31.1094	-0.04883		31.125	-0.01526
	31.2031	-0.03967		31.1875	-0.05188
	31.2969	-0.05188		31.3125	-0.03967
	31.4062	-0.03052		31.4375	-0.06714
	31.5	-0.01526		31.5	-0.06714
	31.6094	-0.04883		31.625	-0.10376
	31.7031	-0.01831		31.6875	-0.07935
	31.7969	-0.02441		31.8125	-0.0885
	31.9062	-0.05188		31.9375	-0.0946
	32	-0.05188		32	-0.0885
	32.1094	-0.03967		32.125	-0.10376
	32.2031	-0.03052		32.1875	-0.08545
	32.2969	-0.04578		32.3125	-0.0885
	32.4062	-0.05188		32.4375	-0.10071
	32.5	-0.02747		32.5	-0.11292
	32.6094	-0.03967		32.625	-0.11597
	32.7031	-0.03967		32.6875	-0.10681
	32.7969	-0.02136		32.8125	-0.10986
	32.9062	-0.05798		32.9375	-0.08545
	33	-0.07324		33	-0.0824
	33.1094	-0.04883		33.125	-0.10376
	33.2031	-0.05188		33.1875	-0.10681
	33.2969	-0.04272		33.3125	-0.0946
	33.4062	-0.00916		33.4375	-0.10681
	33.5	-0.03357		33.5	-0.09766
	33.6094	-0.05188		33.625	-0.11292
	33.7031	-0.04578		33.6875	-0.10071
	33.7969	-0.05493		33.8125	-0.10681
	33.9062	-0.06104		33.9375	-0.09155
	34	-0.03662		34	-0.10376
	34.1094	-0.05798		34.125	-0.10376
	34.2031	-0.03052		34.1875	-0.13428
	34.2969	-0.05798		34.3125	-0.11597
	34.4062	-0.04883		34.4375	-0.10986
	34.5	-0.04883		34.5	-0.10986
	34.6094	-0.05188		34.625	-0.09766
	34.7031	-0.04883		34.6875	-0.08545
	34.7969	-0.05493		34.8125	-0.10681
	34.9062	-0.07935		34.9375	-0.0824
	35	-0.08545		35	-0.07935
	35.1094	-0.09766		35.125	-0.05188
	35.2031	-0.10986		35.1875	-0.09155
	35.2969	-0.0885		35.3125	-0.09155
	35.4062	-0.09766		35.4375	-0.10376
	35.5	-0.05798		35.5	-0.0824
	35.6094	-0.07324		35.625	-0.0885
	35.7031	-0.07935		35.6875	-0.09155
	35.7969	-0.04883		35.8125	-0.0946
	35.9062	-0.09155		35.9375	-0.0946
	36	-0.0885		36	-0.10071
	36.1094	-0.08545		36.125	-0.06104
	36.2031	-0.07019		36.1875	-0.09155
	36.2969	-0.0885		36.3125	-0.09766
	36.4062	-0.05188		36.4375	-0.06409
	36.5	-0.06104		36.5	-0.05188
	36.6094	-0.03967		36.625	-0.06409
	36.7031	-0.05188		36.6875	-0.06409
	36.7969	-0.07935		36.8125	-0.06104
	36.9062	-0.10681		36.9375	-0.05188
	37	-0.10071		37	-0.07935
	37.1094	-0.06104		37.125	-0.07935
	37.2031	-0.05188		37.1875	-0.09766
	37.2969	-0.04272		37.3125	-0.09155
	37.4062	-0.04883		37.4375	-0.0824
	37.5	-0.04272		37.5	-0.07324
	37.6094	-0.01831		37.625	-0.07935
	37.7031	0.01831		37.6875	-0.08545
	37.7969	-0.00305		37.8125	-0.05493
	37.9062	0.0061		37.9375	-0.07019
	38	-0.0061		38	-0.06104
	38.1094	-0.02747		38.125	-0.05798
	38.2031	-0.02747		38.1875	-0.07019
	38.2969	-0.05493		38.3125	-0.0946
	38.4062	-0.01526		38.4375	-0.07935
	38.5	-0.02136		38.5	-0.10071
	38.6094	-0.02136		38.625	-0.11292
	38.7031	-0.01831		38.6875	-0.11292
	38.7969	-0.00305		38.8125	-0.13428
	38.9062	-0.02747		38.9375	-0.10681
	39	-0.01221		39	-0.10986
	39.1094	-0.01526		39.125	-0.10071
	39.2031	0.00916		39.1875	-0.10376
	39.2969	0.01526		39.3125	-0.09766
	39.4062	0		39.4375	-0.10681
	39.5	-0.03052		39.5	-0.10681
	39.6094	-0.05188		39.625	-0.11597
	39.7031	-0.06104		39.6875	-0.0946
	39.7969	-0.06409		39.8125	-0.10376
	39.9062	-0.06714		39.9375	-0.10681
	40	-0.05798		40	-0.11292
	40.1094	-0.0885		40.125	-0.13123
	40.2031	-0.08545		40.1875	-0.13428
	40.2969	-0.0946		40.3125	-0.13123
	40.4062	-0.10071		40.4375	-0.11902
	40.5	-0.0885		40.5	-0.11902
	40.6094	-0.0885		40.625	-0.14954
	40.7031	-0.09155		40.6875	-0.15869
	40.7969	-0.13123		40.8125	-0.12817
	40.9062	-0.10071		40.9375	-0.11292
	41	-0.14038		41	-0.12207
	41.1094	-0.09766		41.125	-0.12512
	41.2031	-0.09155		41.1875	-0.10986
	41.2969	-0.12207		41.3125	-0.0946
	41.4062	-0.14954		41.4375	-0.10376
	41.5	-0.14648		41.5	-0.07935
	41.6094	-0.12512		41.625	-0.06409
	41.7031	-0.11597		41.6875	-0.06409
	41.7969	-0.08545		41.8125	-0.05493
	41.9062	-0.11292		41.9375	-0.0824
	42	-0.11292		42	-0.05188
	42.1094	-0.07324		42.125	-0.05493
	42.2031	-0.0885		42.1875	-0.05188
	42.2969	-0.10071		42.3125	-0.04272
	42.4062	-0.0824		42.4375	-0.06104
	42.5	-0.07324		42.5	-0.04883
	42.6094	-0.0946		42.625	-0.03662
	42.7031	-0.08545		42.6875	-0.02136
	42.7969	-0.11292		42.8125	-0.03052
	42.9062	-0.10376		42.9375	-0.07019
	43	-0.12207		43	-0.06104
	43.1094	-0.12512		43.125	-0.03052
	43.2031	-0.11902		43.1875	-0.05798
	43.2969	-0.10986		43.3125	-0.04578
	43.4062	-0.10376		43.4375	-0.03357
	43.5	-0.06714		43.5	-0.01221
	43.6094	-0.09155		43.625	-0.03967
	43.7031	-0.10681		43.6875	-0.02747
	43.7969	-0.06714		43.8125	-0.03052
	43.9062	-0.07629		43.9375	-0.03357
	44	-0.07324		44	-0.03052
	44.1094	-0.05798		44.125	-0.07324
	44.2031	-0.05798		44.1875	-0.03967
	44.2969	-0.07324		44.3125	-0.03052
	44.4062	-0.05188		44.4375	-0.01526
	44.5	-0.07629		44.5	-0.02441
	44.6094	-0.0824		44.625	-0.03357
	44.7031	-0.05493		44.6875	-0.04272
	44.7969	-0.10071		44.8125	-0.02441
	44.9062	-0.09155		44.9375	-0.05188
	45	-0.10681		45	-0.06104
	45.1094	-0.11597		45.125	-0.04578
	45.2031	-0.10986		45.1875	-0.07629
	45.2969	-0.10376		45.3125	-0.05493
	45.4062	-0.10071		45.4375	-0.06409
	45.5	-0.08545		45.5	-0.08545
	45.6094	-0.08545		45.625	-0.0946
	45.7031	-0.0885		45.6875	-0.0885
	45.7969	-0.07019		45.8125	-0.07019
	45.9062	-0.07324		45.9375	-0.05493
	46	-0.06714		46	-0.05493
	46.1094	-0.09155		46.125	-0.05188
	46.2031	-0.07935		46.1875	-0.06409
	46.2969	-0.0824		46.3125	-0.04883
	46.4062	-0.06714		46.4375	-0.07019
	46.5	-0.10071		46.5	-0.07324
	46.6094	-0.07935		46.625	-0.07935
	46.7031	-0.10071		46.6875	-0.06409
	46.7969	-0.10071		46.8125	-0.06714
	46.9062	-0.06104		46.9375	-0.05493
	47	-0.07019		47	-0.04272
	47.1094	-0.07019		47.125	-0.05493
	47.2031	-0.11292		47.1875	-0.05798
	47.2969	-0.09766		47.3125	-0.04578
	47.4062	-0.07324		47.4375	-0.06409
	47.5	-0.10376		47.5	-0.06104
	47.6094	-0.12817		47.625	-0.08545
	47.7031	-0.13428		47.6875	-0.07019
	47.7969	-0.13123		47.8125	-0.06104
	47.9062	-0.14648		47.9375	-0.07935
	48	-0.10986		48	-0.05798
	48.1094	-0.14038		48.125	-0.05493
	48.2031	-0.13123		48.1875	-0.06409
	48.2969	-0.11597		48.3125	-0.03967
	48.4062	-0.12207		48.4375	-0.04883
	48.5	-0.12207		48.5	-0.03052
	48.6094	-0.13428		48.625	-0.07629
	48.7031	-0.13428		48.6875	-0.07324
	48.7969	-0.14038		48.8125	-0.06714
	48.9062	-0.12207		48.9375	-0.04883
	49	-0.10376		49	-0.02747
	49.1094	-0.12512		49.125	-0.03662
	49.2031	-0.11292		49.1875	-0.03662
	49.2969	-0.08545		49.3125	-0.04883
	49.4062	-0.10376		49.4375	-0.03052
	49.5	-0.10986		49.5	0.00916
	49.6094	-0.0885		49.625	-0.0061
	49.7031	-0.10376		49.6875	-0.01831
	49.7969	-0.06409		49.8125	-0.03052
	49.9062	-0.05798		49.9375	-0.03967
	50	-0.05798		50	-0.00916
	50.1094	-0.06409		50.125	0.00305
	50.2031	-0.05493		50.1875	-0.01831
	50.2969	-0.06714		50.3125	-0.01831
	50.4062	-0.02747		50.4375	-0.0061
	50.5	-0.02441		50.5	-0.00916
	50.6094	-0.03662		50.625	-0.03357
	50.7031	-0.00916		50.6875	-0.02747
	50.7969	-0.01831		50.8125	-0.02441
	50.9062	-0.04883		50.9375	-0.00305
	51	-0.03357		51	-0.05493
	51.1094	-0.04578		51.125	-0.05188
	51.2031	-0.03357		51.1875	-0.04272
	51.2969	-0.06409		51.3125	-0.06409
	51.4062	-0.01831		51.4375	-0.04883
	51.5	-0.0824		51.5	-0.06714
	51.6094	-0.05798		51.625	-0.07019
	51.7031	-0.03662		51.6875	-0.0946
	51.7969	-0.04272		51.8125	-0.09155
	51.9062	-0.04578		51.9375	-0.10986
	52	-0.03662		52	-0.09155
	52.1094	-0.02747		52.125	-0.06714
	52.2031	-0.02441		52.1875	-0.10376
	52.2969	-0.02747		52.3125	-0.09155
	52.4062	-0.05798		52.4375	-0.10071
	52.5	-0.04883		52.5	-0.0946
	52.6094	-0.04272		52.625	-0.10681
	52.7031	-0.05798		52.6875	-0.12817
	52.7969	-0.02441		52.8125	-0.10681
	52.9062	-0.04272		52.9375	-0.07935
	53	-0.05188		53	-0.12817
	53.1094	-0.07935		53.125	-0.11597
	53.2031	-0.06409		53.1875	-0.13428
	53.2969	-0.07324		53.3125	-0.14038
	53.4062	-0.04578		53.4375	-0.10986
	53.5	-0.06104		53.5	-0.12512
	53.6094	-0.06104		53.625	-0.11902
	53.7031	-0.06409		53.6875	-0.07935
	53.7969	-0.09155		53.8125	-0.07629
	53.9062	-0.07324		53.9375	-0.0885
	54	-0.10986		54	-0.10071
	54.1094	-0.06714		54.125	-0.07324
	54.2031	-0.06104		54.1875	-0.0824
	54.2969	-0.05493		54.3125	-0.07629
	54.4062	-0.07629		54.4375	-0.08545
	54.5	-0.07019		54.5	-0.09155
	54.6094	-0.06104		54.625	-0.07935
	54.7031	-0.05188		54.6875	-0.0824
	54.7969	0		54.8125	-0.0885
	54.9062	-0.03357		54.9375	-0.09766
	55	-0.05188		55	-0.10071
	55.1094	-0.04883		55.125	-0.0885
	55.2031	-0.06104		55.1875	-0.0946
	55.2969	-0.05188		55.3125	-0.0946
	55.4062	-0.02441		55.4375	-0.0824
	55.5	-0.05798		55.5	-0.07324
	55.6094	-0.05798		55.625	-0.07935
	55.7031	-0.05188		55.6875	-0.06714
	55.7969	-0.06409		55.8125	-0.07935
	55.9062	-0.0946		55.9375	-0.09155
	56	-0.0824		56	-0.09155
	56.1094	-0.04578		56.125	-0.08545
	56.2031	-0.04883		56.1875	-0.10986
	56.2969	-0.06104		56.3125	-0.0885
	56.4062	-0.06104		56.4375	-0.10376
	56.5	-0.05188		56.5	-0.07629
	56.6094	-0.06714		56.625	-0.0946
	56.7031	-0.0824		56.6875	-0.0824
	56.7969	-0.06714		56.8125	-0.09155
	56.9062	-0.06714		56.9375	-0.05493
	57	-0.05188		57	-0.06409
	57.1094	-0.05493		57.125	-0.07629
	57.2031	-0.07935		57.1875	-0.0946
	57.2969	-0.03357		57.3125	-0.06409
	57.4062	-0.01831		57.4375	-0.10071
	57.5	-0.03967		57.5	-0.0946
	57.6094	-0.03052		57.625	-0.0885
	57.7031	0		57.6875	-0.07019
	57.7969	-0.03662		57.8125	-0.07935
	57.9062	-0.04578		57.9375	-0.07019
	58	-0.03052		58	-0.05798
	58.1094	-0.02747		58.125	-0.06409
	58.2031	-0.02441		58.1875	-0.07935
	58.2969	-0.04272		58.3125	-0.10681
	58.4062	-0.01831		58.4375	-0.12512
	58.5	0		58.5	-0.0946
	58.6094	0.00916		58.625	-0.11597
	58.7031	-0.0061		58.6875	-0.08545
	58.7969	-0.01221		58.8125	-0.07935
	58.9062	-0.03052		58.9375	-0.09155
	59	-0.03052		59	-0.0946
	59.1094	-0.05493		59.125	-0.10071
	59.2031	-0.03967		59.1875	-0.10681
	59.2969	-0.05798		59.3125	-0.09155
	59.4062	-0.03967		59.4375	-0.0946
	59.5	-0.04578		59.5	-0.09766
	59.6094	-0.10071		59.625	-0.10071
	59.7031	-0.06409		59.6875	-0.10986
	59.7969	-0.03967		59.8125	-0.13428
	59.9062	-0.07629		59.9375	-0.11902
	60	-0.09766		60	-0.12207
	60.1094	-0.06104		60.125	-0.13123
	60.2031	-0.09766		60.1875	-0.14648
	60.2969	-0.10071		60.3125	-0.14038
	60.4062	-0.0824		60.4375	-0.14954
	60.5	-0.10376		60.5	-0.10071
	60.6094	-0.08545		60.625	-0.12207
	60.7031	-0.10681		60.6875	-0.11902
	60.7969	-0.11292		60.8125	-0.10986
	60.9062	-0.12512		60.9375	-0.11292
	61	-0.10681		61	-0.10681
	61.1094	-0.0885		61.125	-0.10376
	61.2031	-0.0885		61.1875	-0.10376
	61.2969	-0.09766		61.3125	-0.10681
	61.4062	-0.11902		61.4375	-0.09766
	61.5	-0.11902		61.5	-0.07935
	61.6094	-0.12207		61.625	-0.05798
	61.7031	-0.11292		61.6875	-0.07019
	61.7969	-0.0885		61.8125	-0.07935
	61.9062	-0.12512		61.9375	-0.05493
	62	-0.12512		62	-0.04578
	62.1094	-0.11902		62.125	-0.03052
	62.2031	-0.11597		62.1875	-0.04578
	62.2969	-0.11902		62.3125	-0.04883
	62.4062	-0.10986		62.4375	-0.05493
	62.5	-0.0946		62.5	-0.04578
	62.6094	-0.09766		62.625	-0.02747
	62.7031	-0.10681		62.6875	-0.03357
	62.7969	-0.10986		62.8125	-0.03052
	62.9062	-0.10986		62.9375	-0.02747
	63	-0.11902		63	-0.05188
	63.1094	-0.11292		63.125	-0.06714
	63.2031	-0.12207		63.1875	-0.03052
	63.2969	-0.13733		63.3125	-0.02136
	63.4062	-0.11902		63.4375	-0.02747
	63.5	-0.09155		63.5	-0.01831
	63.6094	-0.10986		63.625	-0.01221
	63.7031	-0.08545		63.6875	-0.02747
	63.7969	-0.10681		63.8125	-0.00305
	63.9062	-0.07935		63.9375	-0.02136
	64	-0.04272		64	-0.03052
	64.1094	-0.05493		64.125	-0.02747
	64.2031	-0.06714		64.1875	-0.03662
	64.2969	-0.07019		64.3125	-0.04272
	64.4062	-0.06714		64.4375	-0.04272
	64.5	-0.03662		64.5	-0.05493
	64.6094	-0.0824		64.625	-0.04272
	64.7031	-0.10376		64.6875	-0.0824
	64.7969	-0.12817		64.8125	-0.07324
	64.9062	-0.12207		64.9375	-0.07324
	65	-0.10986		65	-0.04883
	65.1094	-0.0824		65.125	-0.06104
	65.2031	-0.07629		65.1875	-0.06409
	65.2969	-0.06409		65.3125	-0.03662
	65.4062	-0.0824		65.4375	-0.06104
	65.5	-0.06409		65.5	-0.04883
	65.6094	-0.06409		65.625	-0.04578
	65.7031	-0.07019		65.6875	-0.07629
	65.7969	-0.10376		65.8125	-0.06409
	65.9062	-0.07019		65.9375	-0.05798
	66	-0.06409		66	-0.07019
	66.1094	-0.04883		66.125	-0.05798
	66.2031	-0.10071		66.1875	-0.06104
	66.2969	-0.07019		66.3125	-0.06409
	66.4062	-0.07629		66.4375	-0.0946
	66.5	-0.04578		66.5	-0.0824
	66.6094	-0.07935		66.625	-0.07629
	66.7031	-0.09155		66.6875	-0.06409
	66.7969	-0.07935		66.8125	-0.05493
	66.9062	-0.0946		66.9375	-0.06409
	67	-0.10376		67	-0.05493
	67.1094	-0.07019		67.125	-0.07324
	67.2031	-0.10986		67.1875	-0.07935
	67.2969	-0.10681		67.3125	-0.07324
	67.4062	-0.10681		67.4375	-0.10071
	67.5	-0.10071		67.5	-0.07629
	67.6094	-0.13428		67.625	-0.08545
	67.7031	-0.09766		67.6875	-0.0824
	67.7969	-0.10986		67.8125	-0.06714
	67.9062	-0.11902		67.9375	-0.05798
	68	-0.11597		68	-0.0824
	68.1094	-0.11597		68.125	-0.06104
	68.2031	-0.11597		68.1875	-0.07019
	68.2969	-0.11902		68.3125	-0.05188
	68.4062	-0.10071		68.4375	-0.03662
	68.5	-0.12817		68.5	-0.05188
	68.6094	-0.11902		68.625	-0.03967
	68.7031	-0.11597		68.6875	-0.05188
	68.7969	-0.09766		68.8125	-0.04883
	68.9062	-0.07629		68.9375	-0.04578
	69	-0.10986		69	-0.06409
	69.1094	-0.10376		69.125	-0.05798
	69.2031	-0.0824		69.1875	-0.05493
	69.2969	-0.07629		69.3125	-0.01526
	69.4062	-0.0885		69.4375	-0.03357
	69.5	-0.0946		69.5	-0.02136
	69.6094	-0.07935		69.625	-0.0061
	69.7031	-0.08545		69.6875	-0.00916
	69.7969	-0.10986		69.8125	0.00916
	69.9062	-0.10376		69.9375	-0.03052
	70	-0.0885		70	0
	70.1094	-0.0946		70.125	0.00305
	70.2031	-0.06104		70.1875	-0.01831
	70.2969	-0.05188		70.3125	-0.01221
	70.4062	-0.05188		70.4375	-0.02136
	70.5	-0.04578		70.5	-0.02136
	70.6094	-0.03662		70.625	-0.01221
	70.7031	-0.04272		70.6875	-0.00305
	70.7969	-0.06714		70.8125	-0.04272
	70.9062	-0.04272		70.9375	-0.02747
	71	-0.06409		71	-0.06409
	71.1094	-0.05188		71.125	-0.05493
	71.2031	-0.05798		71.1875	-0.07935
	71.2969	-0.05188		71.3125	-0.06409
	71.4062	-0.01526		71.4375	-0.07629
	71.5	-0.01831		71.5	-0.0824
	71.6094	-0.01526		71.625	-0.0946
	71.7031	-0.03052		71.6875	-0.10376
	71.7969	-0.04272		71.8125	-0.10681
	71.9062	-0.03052		71.9375	-0.08545
	72	-0.02747		72	-0.07324
	72.1094	-0.05188		72.125	-0.10986
	72.2031	-0.04578		72.1875	-0.0946
	72.2969	-0.05798		72.3125	-0.09155
	72.4062	-0.01526		72.4375	-0.11597
	72.5	-0.02747		72.5	-0.11292
	72.6094	-0.03662		72.625	-0.11292
	72.7031	-0.04883		72.6875	-0.10376
	72.7969	-0.04272		72.8125	-0.09155
	72.9062	-0.05493		72.9375	-0.08545
	73	-0.04883		73	-0.12512
	73.1094	-0.07324		73.125	-0.0946
	73.2031	-0.10071		73.1875	-0.14343
	73.2969	-0.0946		73.3125	-0.13733
	73.4062	-0.07019		73.4375	-0.12207
	73.5	-0.04272		73.5	-0.09766
	73.6094	-0.03052		73.625	-0.09155
	73.7031	-0.06104		73.6875	-0.11292
	73.7969	-0.06714		73.8125	-0.10986
	73.9062	-0.06104		73.9375	-0.10681
	74	-0.03357		74	-0.07935
	74.1094	-0.03967		74.125	-0.10681
	74.2031	-0.06409		74.1875	-0.11292
	74.2969	-0.04578		74.3125	-0.11597
	74.4062	-0.05798		74.4375	-0.0885
	74.5	-0.06409		74.5	-0.07935
	74.6094	-0.06104		74.625	-0.10071
	74.7031	-0.06714		74.6875	-0.0824
	74.7969	-0.05798		74.8125	-0.0946
	74.9062	-0.05798		74.9375	-0.10376
	75	-0.04272		75	-0.11292
	75.1094	-0.06104		75.125	-0.11597
	75.2031	-0.06409		75.1875	-0.10071
	75.2969	-0.07019		75.3125	-0.0824
	75.4062	-0.0946		75.4375	-0.09155
	75.5	-0.07935		75.5	-0.04883
	75.6094	-0.05493		75.625	-0.05798
	75.7031	-0.07629		75.6875	-0.07935
	75.7969	-0.03967		75.8125	-0.07324
	75.9062	-0.05798		75.9375	-0.07019
	76	-0.04578		76	-0.07324
	76.1094	-0.06104		76.125	-0.07019
	76.2031	-0.04883		76.1875	-0.06104
	76.2969	-0.05798		76.3125	-0.10071
	76.4062	-0.07629		76.4375	-0.07019
	76.5	-0.07935		76.5	-0.07019
	76.6094	-0.06409		76.625	-0.07935
	76.7031	-0.04578		76.6875	-0.07935
	76.7969	-0.05798		76.8125	-0.0946
	76.9062	-0.04883		76.9375	-0.09155
	77	-0.02747		77	-0.08545
	77.1094	-0.03052		77.125	-0.09766
	77.2031	-0.05188		77.1875	-0.07629
	77.2969	-0.03662		77.3125	-0.06714
	77.4062	-0.07019		77.4375	-0.07019
	77.5	-0.06104		77.5	-0.07629
	77.6094	-0.03052		77.625	-0.06104
	77.7031	-0.03052		77.6875	-0.09155
	77.7969	-0.02136		77.8125	-0.05798
	77.9062	-0.03052		77.9375	-0.07629
	78	-0.02136		78	-0.0885
	78.1094	0.02747		78.125	-0.09155
	78.2031	-0.02136		78.1875	-0.10071
	78.2969	-0.04883		78.3125	-0.0885
	78.4062	-0.04272		78.4375	-0.0946
	78.5	-0.04578		78.5	-0.08545
	78.6094	-0.03967		78.625	-0.09155
	78.7031	-0.02136		78.6875	-0.0824
	78.7969	-0.02441		78.8125	-0.10376
	78.9062	0.01221		78.9375	-0.0824
	79	0.00916		79	-0.09766
	79.1094	-0.00305		79.125	-0.10071
	79.2031	-0.05798		79.1875	-0.09155
	79.2969	-0.02441		79.3125	-0.11292
	79.4062	-0.05188		79.4375	-0.10376
	79.5	-0.07629		79.5	-0.14343
	79.6094	-0.06409		79.625	-0.11902
	79.7031	-0.05493		79.6875	-0.10681
	79.7969	-0.06714		79.8125	-0.08545
	79.9062	-0.0946		79.9375	-0.10376
	80	-0.08545		80	-0.09766
	80.1094	-0.0824		80.125	-0.09155
	80.2031	-0.12207		80.1875	-0.10986
	80.2969	-0.12512		80.3125	-0.13733
	80.4062	-0.10681		80.4375	-0.13733
	80.5	-0.10071		80.5	-0.11597
	80.6094	-0.11902		80.625	-0.13428
	80.7031	-0.09766		80.6875	-0.12207
	80.7969	-0.0946		80.8125	-0.12817
	80.9062	-0.09766		80.9375	-0.14038
	81	-0.06714		81	-0.14038
	81.1094	-0.10376		81.125	-0.10376
	81.2031	-0.0885		81.1875	-0.09155
	81.2969	-0.10071		81.3125	-0.10071
	81.4062	-0.12207		81.4375	-0.09155
	81.5	-0.14343		81.5	-0.09155
	81.6094	-0.12207		81.625	-0.09155
	81.7031	-0.11597		81.6875	-0.08545
	81.7969	-0.13733		81.8125	-0.07935
	81.9062	-0.11902		81.9375	-0.07019
	82	-0.10071		82	-0.06409
	82.1094	-0.10376		82.125	-0.04578
	82.2031	-0.10681		82.1875	-0.06104
	82.2969	-0.10376		82.3125	-0.02441
	82.4062	-0.10071		82.4375	-0.03662
	82.5	-0.11902		82.5	-0.02441
	82.6094	-0.11597		82.625	-0.03357
	82.7031	-0.09766		82.6875	-0.01831
	82.7969	-0.12512		82.8125	-0.04272
	82.9062	-0.08545		82.9375	-0.02747
	83	-0.10376		83	-0.03967
	83.1094	-0.13733		83.125	-0.03967
	83.2031	-0.08545		83.1875	-0.03052
	83.2969	-0.0946		83.3125	-0.01831
	83.4062	-0.09155		83.4375	-0.02747
	83.5	-0.09766		83.5	-0.03357
	83.6094	-0.10681		83.625	-0.04883
	83.7031	-0.0824		83.6875	-0.04578
	83.7969	-0.10681		83.8125	-0.03967
	83.9062	-0.11292		83.9375	-0.03357
	84	-0.10681		84	-0.03052
	84.1094	-0.09155		84.125	-0.04272
	84.2031	-0.10071		84.1875	-0.04883
	84.2969	-0.07324		84.3125	-0.05188
	84.4062	-0.05798		84.4375	-0.04883
	84.5	-0.06409		84.5	-0.06104
	84.6094	-0.0824		84.625	-0.04272
	84.7031	-0.09155		84.6875	-0.03052
	84.7969	-0.0824		84.8125	-0.06409
	84.9062	-0.0946		84.9375	-0.05493
	85	-0.09766		85	-0.05798
	85.1094	-0.04883		85.125	-0.06104
	85.2031	-0.04272		85.1875	-0.06409
	85.2969	-0.06409		85.3125	-0.06104
	85.4062	-0.07324		85.4375	-0.05188
	85.5	-0.06714		85.5	-0.04883
	85.6094	-0.07019		85.625	-0.05798
	85.7031	-0.07324		85.6875	-0.05493
	85.7969	-0.06104		85.8125	-0.05188
	85.9062	-0.06409		85.9375	-0.06104
	86	-0.07019		86	-0.07019
	86.1094	-0.06104		86.125	-0.07019
	86.2031	-0.06714		86.1875	-0.05798
	86.2969	-0.07019		86.3125	-0.03967
	86.4062	-0.07935		86.4375	-0.03357
	86.5	-0.07019		86.5	-0.05493
	86.6094	-0.06714		86.625	-0.05798
	86.7031	-0.06714		86.6875	-0.06409
	86.7969	-0.0885		86.8125	-0.05798
	86.9062	-0.10681		86.9375	-0.07324
	87	-0.10376		87	-0.0824
	87.1094	-0.11902		87.125	-0.07629
	87.2031	-0.13123		87.1875	-0.03967
	87.2969	-0.11597		87.3125	-0.04272
	87.4062	-0.0885		87.4375	-0.04272
	87.5	-0.07935		87.5	-0.05188
	87.6094	-0.09766		87.625	-0.03967
	87.7031	-0.0946		87.6875	-0.04272
	87.7969	-0.11902		87.8125	-0.07629
	87.9062	-0.14343		87.9375	-0.05188
	88	-0.13123		88	-0.07935
	88.1094	-0.12207		88.125	-0.06409
	88.2031	-0.12817		88.1875	-0.06104
	88.2969	-0.11902		88.3125	-0.06714
	88.4062	-0.10376		88.4375	-0.05188
	88.5	-0.14648		88.5	-0.06409
	88.6094	-0.10681		88.625	-0.07935
	88.7031	-0.01831		88.6875	-0.0824
	88.7969	0.01831		88.8125	-0.07935
	88.9062	0.04578		88.9375	-0.04883
	89	0.04578		89	-0.06104
	89.1094	0.05188		89.125	-0.05798
	89.2031	0.05188		89.1875	-0.04883
	89.2969	0.05493		89.3125	-0.02747
	89.4062	0.0061		89.4375	-0.03357
	89.5	0.01831		89.5	0.0061
	89.6094	0.03967		89.625	-0.02747
	89.7031	-0.0061		89.6875	-0.03357
	89.7969	0.00916		89.8125	-0.02747
	89.9062	0.02136		89.9375	-0.01526
	90	0.01831		90	-0.0061
	90.1094	0		90.125	-0.01221
	90.2031	-0.0061		90.1875	-0.04578
	90.2969	-0.01221		90.3125	-0.0061
	90.4062	0.00305		90.4375	0.01526
	90.5	0.01526		90.5	-0.01221
	90.6094	0.05188		90.625	-0.01831
	90.7031	0.05493		90.6875	-0.03967
	90.7969	0.06714		90.8125	-0.03357
	90.9062	0.07935		90.9375	-0.03967
	91	0.12512		91	-0.02441
	91.1094	0.18311		91.125	-0.03662
	91.2031	0.2655		91.1875	-0.05493
	91.2969	0.40283		91.3125	-0.04578
	91.4062	0.55237		91.4375	-0.07324
	91.5	0.65918		91.5	-0.0824
	91.6094	0.64697		91.625	-0.0824
	91.7031	0.56458		91.6875	-0.0885
	91.7969	0.43945		91.8125	-0.06714
	91.9062	0.30823		91.9375	-0.06409
	92	0.14954		92	-0.10376
	92.1094	0.0061		92.125	-0.09766
	92.2031	-0.13428		92.1875	-0.08545
	92.2969	-0.26855		92.3125	-0.07935
	92.4062	-0.3418		92.4375	-0.0885
	92.5	-0.37537		92.5	-0.11292
	92.6094	-0.42419		92.625	-0.13123
	92.7031	-0.44556		92.6875	-0.12512
	92.7969	-0.46997		92.8125	-0.11292
	92.9062	-0.49133		92.9375	-0.0885
	93	-0.49438		93	-0.12817
	93.1094	-0.46997		93.125	-0.13428
	93.2031	-0.48828		93.1875	-0.11292
	93.2969	-0.43335		93.3125	-0.10681
	93.4062	-0.4303		93.4375	-0.10681
	93.5	-0.41809		93.5	-0.11597
	93.6094	-0.41809		93.625	-0.13733
	93.7031	-0.38147		93.6875	-0.10986
	93.7969	-0.32654		93.8125	-0.12207
	93.9062	-0.31433		93.9375	-0.13428
	94	-0.29907		94	-0.14038
	94.1094	-0.27771		94.125	-0.12207
	94.2031	-0.26245		94.1875	-0.13733
	94.2969	-0.23804		94.3125	-0.11292
	94.4062	-0.20142		94.4375	-0.09766
	94.5	-0.23499		94.5	-0.11292
	94.6094	-0.22278		94.625	-0.11292
	94.7031	-0.177		94.6875	-0.10681
	94.7969	-0.16174		94.8125	-0.0946
	94.9062	-0.16174		94.9375	-0.0946
	95	-0.12512		95	-0.08545
	95.1094	-0.12817		95.125	-0.06409
	95.2031	-0.13428		95.1875	-0.10376
	95.2969	-0.10376		95.3125	-0.07935
	95.4062	-0.13123		95.4375	-0.10071
	95.5	-0.07935		95.5	-0.09766
	95.6094	-0.07935		95.625	-0.10376
	95.7031	-0.10071		95.6875	-0.10681
	95.7969	-0.09766		95.8125	-0.10071
	95.9062	-0.08545		95.9375	-0.0885
	96	-0.08545		96	-0.10681
	96.1094	-0.09766		96.125	-0.07935
	96.2031	-0.07324		96.1875	-0.10071
	96.2969	-0.05493		96.3125	-0.07935
	96.4062	-0.07629		96.4375	-0.07019
	96.5	-0.06714		96.5	-0.0885
	96.6094	-0.04883		96.625	-0.07629
	96.7031	-0.04272		96.6875	-0.07935
	96.7969	-0.05798		96.8125	-0.08545
	96.9062	-0.06714		96.9375	-0.07324
	97	-0.05798		97	-0.07324
	97.1094	-0.01526		97.125	-0.06714
	97.2031	-0.01831		97.1875	-0.06714
	97.2969	-0.05493		97.3125	-0.06409
	97.4062	-0.03662		97.4375	-0.0885
	97.5	-0.03052		97.5	-0.06409
	97.6094	-0.02441		97.625	-0.08545
	97.7031	-0.01831		97.6875	-0.07629
	97.7969	-0.02747		97.8125	-0.07019
	97.9062	-0.04883		97.9375	-0.08545
	98	-0.06409		98	-0.11292
	98.1094	-0.04272		98.125	-0.11902
	98.2031	-0.02441		98.1875	-0.09766
	98.2969	-0.02136		98.3125	-0.11902
	98.4062	-0.03662		98.4375	-0.11597
	98.5	-0.03357		98.5	-0.07324
	98.6094	-0.01221		98.625	-0.0824
	98.7031	0.00916		98.6875	-0.10376
	98.7969	-0.02441		98.8125	-0.10071
	98.9062	-0.01526		98.9375	-0.0824
	99	-0.03052		99	-0.07935
	99.1094	-0.01221		99.125	-0.10376
	99.2031	-0.05798		99.1875	-0.09766
	99.2969	-0.03662		99.3125	-0.10376
	99.4062	-0.06104		99.4375	-0.10071
	99.5	-0.04883		99.5	-0.10681
	99.6094	-0.07324		99.625	-0.14343
	99.7031	-0.05493		99.6875	-0.12207
	99.7969	-0.07324		99.8125	-0.10681
	99.9062	-0.06409		99.9375	-0.11292
	100	-0.06714		100	-0.10986
	100.109	-0.09766		100.125	-0.13123
	100.203	-0.10071		100.188	-0.15259
	100.297	-0.0824		100.312	-0.15564
	100.406	-0.09766		100.438	-0.14038
	100.5	-0.13733		100.5	-0.11292
	100.609	-0.11597		100.625	-0.11597
	100.703	-0.09155		100.688	-0.10986
	100.797	-0.11597		100.812	-0.11902
	100.906	-0.14038		100.938	-0.11597
	101	-0.14038		101	-0.10071
	101.109	-0.10681		101.125	-0.09155
	101.203	-0.10986		101.188	-0.11292
	101.297	-0.12207		101.312	-0.12207
	101.406	-0.10986		101.438	-0.07629
	101.5	-0.10681		101.5	-0.06714
	101.609	-0.11597		101.625	-0.07324
	101.703	-0.10986		101.688	-0.04883
	101.797	-0.09155		101.812	-0.05798
	101.906	-0.07629		101.938	-0.05188
	102	-0.07935		102	-0.03967
	102.109	-0.10681		102.125	-0.07935
	102.203	-0.10681		102.188	-0.0824
	102.297	-0.0824		102.312	-0.05798
	102.406	-0.07324		102.438	-0.04578
	102.5	-0.11597		102.5	-0.03662
	102.609	-0.10681		102.625	-0.01831
	102.703	-0.07935		102.688	-0.03357
	102.797	-0.09155		102.812	-0.05493
	102.906	-0.0824		102.938	-0.07019
	103	-0.11292		103	-0.05798
	103.109	-0.11597		103.125	-0.05188
	103.203	-0.07629		103.188	-0.03357
	103.297	-0.10681		103.312	-0.01221
	103.406	-0.0946		103.438	-0.0061
	103.5	-0.06409		103.5	-0.01221
	103.609	-0.07935		103.625	-0.03662
	103.703	-0.07019		103.688	-0.03967
	103.797	-0.0824		103.812	-0.03662
	103.906	-0.12207		103.938	-0.04578
	104	-0.09155		104	-0.07019
	104.109	-0.08545		104.125	-0.06714
	104.203	-0.09155		104.188	-0.05493
	104.297	-0.09155		104.312	-0.06104
	104.406	-0.06714		104.438	-0.09155
	104.5	-0.10681		104.5	-0.06104
	104.609	-0.0946		104.625	-0.06714
	104.703	-0.07629		104.688	-0.04883
	104.797	-0.04883		104.812	-0.06409
	104.906	-0.06409		104.938	-0.04883
	105	-0.0824		105	-0.06104
	105.109	-0.07019		105.125	-0.05493
	105.203	-0.07629		105.188	-0.03052
	105.297	-0.06409		105.312	-0.00305
	105.406	-0.0824		105.438	-0.05493
	105.5	-0.07324		105.5	-0.07019
	105.609	-0.06714		105.625	-0.05188
	105.703	-0.06104		105.688	-0.07324
	105.797	-0.09155		105.812	-0.06409
	105.906	-0.04883		105.938	-0.05188
	106	-0.03967		106	-0.03662
	106.109	-0.06104		106.125	-0.02441
	106.203	-0.03662		106.188	-0.03357
	106.297	-0.03967		106.312	-0.04883
	106.406	-0.04272		106.438	-0.07019
	106.5	-0.07629		106.5	-0.07935
	106.609	-0.07324		106.625	-0.05493
	106.703	-0.06409		106.688	-0.03967
	106.797	-0.0824		106.812	-0.05493
	106.906	-0.0824		106.938	-0.06409
	107	-0.07019		107	-0.06104
	107.109	-0.07324		107.125	-0.05188
	107.203	-0.09155		107.188	-0.06104
	107.297	-0.06409		107.312	-0.07629
	107.406	-0.07935		107.438	-0.09155
	107.5	-0.10376		107.5	-0.05188
	107.609	-0.11292		107.625	-0.04883
	107.703	-0.14038		107.688	-0.04578
	107.797	-0.11292		107.812	-0.03357
	107.906	-0.12512		107.938	-0.06714
	108	-0.12207		108	-0.07324
	108.109	-0.10681		108.125	-0.06714
	108.203	-0.10986		108.188	-0.05798
	108.297	-0.0946		108.312	-0.04883
	108.406	-0.10376		108.438	-0.05798
	108.5	-0.12207		108.5	-0.06104
	108.609	-0.14648		108.625	-0.07629
	108.703	-0.11292		108.688	-0.04272
	108.797	-0.10376		108.812	-0.03662
	108.906	-0.09155		108.938	-0.03052
	109	-0.11292		109	-0.01831
	109.109	-0.11902		109.125	-0.06104
	109.203	-0.10681		109.188	-0.02747
	109.297	-0.09766		109.312	-0.02441
	109.406	-0.07935		109.438	-0.05493
	109.5	-0.0824		109.5	-0.03662
	109.609	-0.04578		109.625	-0.02441
	109.703	-0.06409		109.688	-0.00916
	109.797	-0.06714		109.812	-0.03967
	109.906	-0.04578		109.938	-0.03662
	110	-0.01526		110	-0.05188
	110.109	-0.04272		110.125	-0.00916
	110.203	-0.06714		110.188	-0.02441
	110.297	-0.05493		110.312	-0.03052
	110.406	-0.05798		110.438	0.00305
	110.5	-0.04883		110.5	-0.00916
	110.609	-0.06714		110.625	-0.02441
	110.703	-0.02747		110.688	-0.01831
	110.797	-0.03967		110.812	-0.02747
	110.906	-0.02136		110.938	-0.05188
	111	-0.02747		111	-0.02747
	111.109	-0.03052		111.125	-0.04883
	111.203	-0.04578		111.188	-0.03967
	111.297	-0.04578		111.312	-0.03967
	111.406	-0.06714		111.438	-0.03357
	111.5	-0.03052		111.5	-0.07629
	111.609	-0.04272		111.625	-0.06409
	111.703	-0.02747		111.688	-0.05493
	111.797	-0.03357		111.812	-0.07324
	111.906	-0.03967		111.938	-0.10681
	112	-0.03357		112	-0.11597
	112.109	-0.01221		112.125	-0.10376
	112.203	-0.02747		112.188	-0.09766
	112.297	-0.03052		112.312	-0.10376
	112.406	-0.03967		112.438	-0.10986
	112.5	-0.04272		112.5	-0.10986
	112.609	-0.04578		112.625	-0.12207
	112.703	-0.06714		112.688	-0.14343
	112.797	-0.04578		112.812	-0.14038
	112.906	-0.05188		112.938	-0.13428
	113	-0.05188		113	-0.13733
	113.109	-0.04883		113.125	-0.12207
	113.203	-0.03662		113.188	-0.08545
	113.297	-0.06409		113.312	-0.11292
	113.406	-0.05798		113.438	-0.09155
	113.5	-0.06714		113.5	-0.09155
	113.609	-0.05798		113.625	-0.10071
	113.703	-0.06714		113.688	-0.12207
	113.797	-0.05493		113.812	-0.10376
	113.906	-0.04578		113.938	-0.12207
	114	-0.06104		114	-0.12817
	114.109	-0.05188		114.125	-0.11292
	114.203	-0.06104		114.188	-0.10376
	114.297	-0.02441		114.312	-0.06714
	114.406	-0.04272		114.438	-0.10376
	114.5	-0.03967		114.5	-0.12512
	114.609	-0.02136		114.625	-0.12817
	114.703	-0.02136		114.688	-0.0946
	114.797	-0.03052		114.812	-0.06714
	114.906	-0.05493		114.938	-0.0824
	115	-0.06714		115	-0.10071
	115.109	-0.06409		115.125	-0.07324
	115.203	-0.09155		115.188	-0.07019
	115.297	-0.10376		115.312	-0.0885
	115.406	-0.04272		115.438	-0.10681
	115.5	-0.05188		115.5	-0.05493
	115.609	-0.07019		115.625	-0.09155
	115.703	-0.06714		115.688	-0.0946
	115.797	-0.07629		115.812	-0.0946
	115.906	-0.09155		115.938	-0.10681
	116	-0.06409		116	-0.0824
	116.109	-0.06714		116.125	-0.06409
	116.203	-0.06104		116.188	-0.08545
	116.297	-0.03662		116.312	-0.06714
	116.406	-0.05798		116.438	-0.06104
	116.5	-0.03662		116.5	-0.06714
	116.609	-0.03357		116.625	-0.04883
	116.703	-0.05493		116.688	-0.06104
	116.797	-0.06104		116.812	-0.06714
	116.906	-0.05493		116.938	-0.07324
	117	-0.07935		117	-0.07935
	117.109	-0.06409		117.125	-0.10071
	117.203	-0.06104		117.188	-0.10071
	117.297	-0.05798		117.312	-0.07629
	117.406	-0.04272		117.438	-0.07019
	117.5	-0.03967		117.5	-0.06409
	117.609	-0.03052		117.625	-0.09766
	117.703	-0.01831		117.688	-0.09766
	117.797	-0.03662		117.812	-0.07324
	117.906	-0.04578		117.938	-0.07629
	118	-0.03357		118	-0.08545
	118.109	-0.04883		118.125	-0.05188
	118.203	-0.03967		118.188	-0.07629
	118.297	0.00305		118.312	-0.05188
	118.406	-0.02747		118.438	-0.0885
	118.5	-0.01526		118.5	-0.0824
	118.609	-0.02441		118.625	-0.06714
	118.703	-0.02441		118.688	-0.0824
	118.797	-0.01831		118.812	-0.10071
	118.906	-0.02136		118.938	-0.11292
	119	-0.01526		119	-0.07935
	119.109	-0.0061		119.125	-0.10681
	119.203	-0.03967		119.188	-0.10986
	119.297	-0.03357		119.312	-0.11597
	119.406	-0.04578		119.438	-0.10681
	119.5	-0.04272		119.5	-0.12512
	119.609	-0.05188		119.625	-0.12512
	119.703	-0.05493		119.688	-0.11902
	119.797	-0.05493		119.812	-0.13733
	119.906	-0.06409		119.938	-0.13123
	120	-0.07019		120	-0.14038
	120.109	-0.05798		120.125	-0.14954
	120.203	-0.0885		120.188	-0.11902
	120.297	-0.0946		120.312	-0.12512
	120.406	-0.11292		120.438	-0.12207
	120.5	-0.0946		120.5	-0.10986
	120.609	-0.10376		120.625	-0.12512
	120.703	-0.10986		120.688	-0.12207
	120.797	-0.11292		120.812	-0.08545
	120.906	-0.10376		120.938	-0.11597
	121	-0.10376		121	-0.11292
	121.109	-0.09766		121.125	-0.09766
	121.203	-0.0824		121.188	-0.09155
	121.297	-0.10681		121.312	-0.0824
	121.406	-0.11597		121.438	-0.07629
	121.5	-0.09155		121.5	-0.06104
	121.609	-0.11292		121.625	-0.0824
	121.703	-0.10986		121.688	-0.03052
	121.797	-0.11292		121.812	-0.02441
	121.906	-0.11597		121.938	-0.02747
	122	-0.12817		122	-0.04883
	122.109	-0.10071		122.125	-0.03662
	122.203	-0.09155		122.188	-0.03967
	122.297	-0.10071		122.312	-0.04578
	122.406	-0.09155		122.438	-0.02136
	122.5	-0.0946		122.5	-0.01221
	122.609	-0.05493		122.625	-0.04578
	122.703	-0.08545		122.688	-0.03662
	122.797	-0.09155		122.812	-0.02136
	122.906	-0.0885		122.938	-0.03662
	123	-0.0885		123	-0.06104
	123.109	-0.0824		123.125	-0.06714
	123.203	-0.06714		123.188	-0.06714
	123.297	-0.05493		123.312	-0.05798
	123.406	-0.05188		123.438	-0.03662
	123.5	-0.07324		123.5	-0.02136
	123.609	-0.09155		123.625	-0.04578
	123.703	-0.0824		123.688	-0.04272
	123.797	-0.09766		123.812	-0.05493
	123.906	-0.10376		123.938	-0.02747
	124	-0.07935		124	-0.04272
	124.109	-0.12512		124.125	-0.05493
	124.203	-0.10376		124.188	-0.05188
	124.297	-0.10376		124.312	-0.06104
	124.406	-0.07935		124.438	-0.07324
	124.5	-0.0946		124.5	-0.04883
	124.609	-0.07019		124.625	-0.04578
	124.703	-0.0824		124.688	-0.05493
	124.797	-0.07324		124.812	-0.05188
	124.906	-0.06714		124.938	-0.07324
	125	-0.07629		125	-0.07629
	125.109	-0.06714		125.125	-0.07324
	125.203	-0.04578		125.188	-0.07324
	125.297	-0.0946		125.312	-0.07324
	125.406	-0.08545		125.438	-0.07935
	125.5	-0.07019		125.5	-0.03967
	125.609	-0.07935		125.625	-0.07019
	125.703	-0.07324		125.688	-0.10376
	125.797	-0.05798		125.812	-0.07019
	125.906	-0.05493		125.938	-0.05798
	126	-0.05798		126	-0.0885
	126.109	-0.07935		126.125	-0.07935
	126.203	-0.09155		126.188	-0.05188
	126.297	-0.0824		126.312	-0.0824
	126.406	-0.08545		126.438	-0.08545
	126.5	-0.07019		126.5	-0.05493
	126.609	-0.07019		126.625	-0.07019
	126.703	-0.07935		126.688	-0.06104
	126.797	-0.0885		126.812	-0.06714
	126.906	-0.11597		126.938	-0.04272
	127	-0.07019		127	-0.03967
	127.109	-0.0824		127.125	-0.03967
	127.203	-0.09766		127.188	-0.06714
	127.297	-0.11597		127.312	-0.06714
	127.406	-0.12207		127.438	-0.05493
	127.5	-0.11597		127.5	-0.07324
	127.609	-0.12817		127.625	-0.04272
	127.703	-0.11292		127.688	-0.05798
	127.797	-0.14038		127.812	-0.04883
	127.906	-0.10986		127.938	-0.05798
	128	-0.11292		128	-0.06714
	128.109	-0.12512		128.125	-0.05798
	128.203	-0.11597		128.188	-0.05493
	128.297	-0.10986		128.312	-0.08545
	128.406	-0.14038		128.438	-0.06409
	128.5	-0.13123		128.5	-0.07324
	128.609	-0.11597		128.625	-0.06409
	128.703	-0.10986		128.688	-0.05188
	128.797	-0.12817		128.812	-0.05493
	128.906	-0.10986		128.938	-0.03662
	129	-0.12512		129	-0.03357
	129.109	-0.0946		129.125	-0.04578
	129.203	-0.10376		129.188	-0.06409
	129.297	-0.09766		129.312	-0.05188
	129.406	-0.11292		129.438	-0.03967
	129.5	-0.0885		129.5	-0.02747
	129.609	-0.10681		129.625	-0.02747
	129.703	-0.06714		129.688	-0.02747
	129.797	-0.08545		129.812	-0.02441
	129.906	-0.0885		129.938	-0.02747
	130	-0.07629		130	-0.03662
	130.109	-0.06409		130.125	-0.0061
	130.203	-0.06409		130.188	0.00916
	130.297	-0.05798		130.312	-0.01831
	130.406	-0.04272		130.438	-0.00916
	130.5	-0.04883		130.5	-0.05493
	130.609	-0.04272		130.625	-0.03052
	130.703	-0.02441		130.688	-0.03052
	130.797	-0.01526		130.812	-0.03052
	130.906	-0.01526		130.938	-0.04272
	131	-0.02747		131	-0.00305
	131.109	-0.03967		131.125	-0.03357
	131.203	-0.03662		131.188	-0.06714
	131.297	-0.02136		131.312	-0.05493
	131.406	-0.01221		131.438	-0.06104
	131.5	-0.0061		131.5	-0.05188
	131.609	-0.02747		131.625	-0.06104
	131.703	-0.01831		131.688	-0.05493
	131.797	-0.00916		131.812	-0.05493
	131.906	-0.01831		131.938	-0.05493
	132	-0.02747		132	-0.08545
	132.109	-0.01831		132.125	-0.09155
	132.203	-0.02747		132.188	-0.07935
	132.297	-0.02441		132.312	-0.09766
	132.406	0		132.438	-0.10376
	132.5	-0.04578		132.5	-0.08545
	132.609	-0.04883		132.625	-0.10681
	132.703	-0.07324		132.688	-0.07935
	132.797	-0.06104		132.812	-0.0824
	132.906	-0.06409		132.938	-0.08545
	133	-0.03052		133	-0.09766
	133.109	-0.05798		133.125	-0.11292
	133.203	-0.07019		133.188	-0.10986
	133.297	-0.07629		133.312	-0.10681
	133.406	-0.05188		133.438	-0.12207
	133.5	-0.07019		133.5	-0.10681
	133.609	-0.04578		133.625	-0.10986
	133.703	-0.0885		133.688	-0.06104
	133.797	-0.05188		133.812	-0.06714
	133.906	-0.06714		133.938	-0.07935
	134	-0.04272		134	-0.10071
	134.109	-0.05798		134.125	-0.11902
	134.203	-0.10376		134.188	-0.10071
	134.297	-0.10071		134.312	-0.09155
	134.406	-0.07324		134.438	-0.09766
	134.5	-0.0824		134.5	-0.08545
	134.609	-0.0885		134.625	-0.0885
	134.703	-0.04883		134.688	-0.0824
	134.797	-0.03052		134.812	-0.06714
	134.906	-0.04578		134.938	-0.06104
	135	-0.05493		135	-0.07935
	135.109	-0.0824		135.125	-0.07629
	135.203	-0.04883		135.188	-0.0824
	135.297	-0.03662		135.312	-0.0885
	135.406	-0.04883		135.438	-0.0885
	135.5	-0.04883		135.5	-0.09766
	135.609	-0.05798		135.625	-0.0824
	135.703	-0.04883		135.688	-0.10071
	135.797	-0.04578		135.812	-0.10376
	135.906	-0.06714		135.938	-0.0885
	136	-0.05493		136	-0.07019
	136.109	-0.05188		136.125	-0.10681
	136.203	-0.05493		136.188	-0.0885
	136.297	-0.04883		136.312	-0.07629
	136.406	-0.05493		136.438	-0.06104
	136.5	-0.06409		136.5	-0.07019
	136.609	-0.07629		136.625	-0.06104
	136.703	-0.06714		136.688	-0.06409
	136.797	-0.05493		136.812	-0.07629
	136.906	-0.07324		136.938	-0.06714
	137	-0.07629		137	-0.0824
	137.109	-0.04578		137.125	-0.0885
	137.203	-0.01526		137.188	-0.07629
	137.297	-0.01221		137.312	-0.09155
	137.406	-0.05798		137.438	-0.10071
	137.5	-0.07935		137.5	-0.10986
	137.609	-0.04578		137.625	-0.0824
	137.703	-0.05493		137.688	-0.08545
	137.797	-0.05493		137.812	-0.10681
	137.906	-0.04272		137.938	-0.11292
	138	-0.04272		138	-0.0946
	138.109	-0.07019		138.125	-0.0824
	138.203	-0.04578		138.188	-0.0885
	138.297	-0.05798		138.312	-0.06714
	138.406	-0.02441		138.438	-0.09155
	138.5	0.04272		138.5	-0.08545
	138.609	-0.00916		138.625	-0.07324
	138.703	-0.05493		138.688	-0.0824
	138.797	-0.03662		138.812	-0.09155
	138.906	-0.02136		138.938	-0.10376
	139	-0.02136		139	-0.10986
	139.109	-0.01221		139.125	-0.10681
	139.203	-0.00916		139.188	-0.10376
	139.297	-0.03662		139.312	-0.09155
	139.406	-0.03052		139.438	-0.12207
	139.5	-0.03052		139.5	-0.13428
	139.609	-0.05188		139.625	-0.0946
	139.703	-0.05188		139.688	-0.11292
	139.797	-0.05188		139.812	-0.09766
	139.906	-0.06714		139.938	-0.10071
	140	-0.09766		140	-0.0824
	140.109	-0.0885		140.125	-0.10376
	140.203	-0.0946		140.188	-0.11597
	140.297	-0.11902		140.312	-0.11597
	140.406	-0.10986		140.438	-0.14038
	140.5	-0.12207		140.5	-0.12512
	140.609	-0.13733		140.625	-0.12207
	140.703	-0.14038		140.688	-0.12207
	140.797	-0.14343		140.812	-0.09766
	140.906	-0.13733		140.938	-0.10681
	141	-0.11597		141	-0.12512
	141.109	-0.10071		141.125	-0.10376
	141.203	-0.12207		141.188	-0.10986
	141.297	-0.13428		141.312	-0.09155
	141.406	-0.14954		141.438	-0.11597
	141.5	-0.12207		141.5	-0.12512
	141.609	-0.13428		141.625	-0.11292
	141.703	-0.11292		141.688	-0.07629
	141.797	-0.13733		141.812	-0.07629
	141.906	-0.07019		141.938	-0.07935
	142	-0.09155		142	-0.04578
	142.109	-0.07324		142.125	-0.04272
	142.203	-0.07019		142.188	-0.09155
	142.297	-0.10376		142.312	-0.01831
	142.406	-0.10681		142.438	-0.04272
	142.5	-0.10376		142.5	-0.04883
	142.609	-0.10376		142.625	-0.03967
	142.703	-0.09155		142.688	-0.07324
	142.797	-0.13428		142.812	-0.03052
	142.906	-0.10681		142.938	-0.03357
	143	-0.09766		143	-0.04578
	143.109	-0.0946		143.125	-0.06104
	143.203	-0.0946		143.188	-0.05798
	143.297	-0.11597		143.312	-0.03357
	143.406	-0.09155		143.438	-0.04272
	143.5	-0.11292		143.5	-0.01221
	143.609	-0.0824		143.625	-0.00305
	143.703	-0.06714		143.688	-0.03967
	143.797	-0.07629		143.812	-0.02747
	143.906	-0.07629		143.938	-0.03052
	144	-0.08545		144	-0.02441
	144.109	-0.11902		144.125	-0.01221
	144.203	-0.10681		144.188	-0.03052
	144.297	-0.09766		144.312	-0.05188
	144.406	-0.09766		144.438	-0.05493
	144.5	-0.0885		144.5	-0.02747
	144.609	-0.09155		144.625	-0.03967
	144.703	-0.09766		144.688	-0.04578
	144.797	-0.07629		144.812	-0.03662
	144.906	-0.0885		144.938	-0.04578
	145	-0.07629		145	-0.07019
	145.109	-0.10681		145.125	-0.0824
	145.203	-0.0885		145.188	-0.05798
	145.297	-0.10071		145.312	-0.07935
	145.406	-0.07935		145.438	-0.04272
	145.5	-0.08545		145.5	-0.03662
	145.609	-0.07019		145.625	-0.05188
	145.703	-0.07019		145.688	-0.07019
	145.797	-0.06409		145.812	-0.07324
	145.906	-0.0824		145.938	-0.07324
	146	-0.07935		146	-0.06409
	146.109	-0.07629		146.125	-0.05188
	146.203	-0.07324		146.188	-0.07935
	146.297	-0.06104		146.312	-0.08545
	146.406	-0.0824		146.438	-0.0885
	146.5	-0.02441		146.5	-0.06714
	146.609	-0.02747		146.625	-0.06409
	146.703	-0.05493		146.688	-0.07629
	146.797	-0.09155		146.812	-0.07629
	146.906	-0.11902		146.938	-0.06104
	147	-0.13123		147	-0.05493
	147.109	-0.13733		147.125	-0.04883
	147.203	-0.10681		147.188	-0.05493
	147.297	-0.0946		147.312	-0.07935
	147.406	-0.0885		147.438	-0.07629
	147.5	-0.10071		147.5	-0.07019
	147.609	-0.10376		147.625	-0.07629
	147.703	-0.10986		147.688	-0.05188
	147.797	-0.10986		147.812	-0.06409
	147.906	-0.07629		147.938	-0.09155
	148	-0.0885		148	-0.08545
	148.109	-0.10071		148.125	-0.08545
	148.203	-0.11292		148.188	-0.09155
	148.297	-0.12207		148.312	-0.07019
	148.406	-0.12207		148.438	-0.07935
	148.5	-0.11292		148.5	-0.0824
	148.609	-0.11902		148.625	-0.05798
	148.703	-0.14038		148.688	-0.06104
	148.797	-0.12817		148.812	-0.03662
	148.906	-0.13123		148.938	-0.05188
	149	-0.12817		149	-0.03662
	149.109	-0.10681		149.125	-0.02747
	149.203	-0.07935		149.188	-0.02441
	149.297	-0.11902		149.312	-0.04578
	149.406	-0.10071		149.438	-0.00916
	149.5	-0.10681		149.5	-0.01221
	149.609	-0.0824		149.625	-0.00916
	149.703	-0.05798		149.688	-0.0061
	149.797	-0.0824		149.812	-0.00916
	149.906	-0.04883		149.938	-0.02136
	150	-0.03662		150	-0.04272
	150.109	-0.04272		150.125	-0.05188
	150.203	-0.05798		150.188	-0.02441
	150.297	-0.05798		150.312	-0.00305
	150.406	-0.04272		150.438	-0.01526
	150.5	-0.04272		150.5	-0.03052
	150.609	-0.02747		150.625	-0.00916
	150.703	-0.03662		150.688	0
	150.797	-0.03967		150.812	-0.02747
	150.906	-0.05798		150.938	-0.04578
	151	-0.03357		151	-0.05493
	151.109	-0.03662		151.125	-0.03967
	151.203	-0.03052		151.188	-0.05188
	151.297	-0.03052		151.312	-0.05493
	151.406	-0.02136		151.438	-0.03967
	151.5	-0.02747		151.5	-0.05798
	151.609	-0.02441		151.625	-0.07935
	151.703	-0.01221		151.688	-0.08545
	151.797	-0.03967		151.812	-0.07935
	151.906	-0.06714		151.938	-0.07324
	152	-0.05798		152	-0.10071
	152.109	-0.03662		152.125	-0.07629
	152.203	-0.06409		152.188	-0.07019
	152.297	-0.03967		152.312	-0.08545
	152.406	-0.02441		152.438	-0.13123
	152.5	-0.03967		152.5	-0.07629
	152.609	-0.04578		152.625	-0.12207
	152.703	-0.06714		152.688	-0.10376
	152.797	-0.04883		152.812	-0.12817
	152.906	-0.06714		152.938	-0.12207
	153	-0.04272		153	-0.09766
	153.109	-0.00305		153.125	-0.07935
	153.203	-0.03052		153.188	-0.10376
	153.297	-0.04883		153.312	-0.10681
	153.406	-0.03052		153.438	-0.14038
	153.5	-0.02136		153.5	-0.09766
	153.609	-0.03052		153.625	-0.12512
	153.703	-0.05188		153.688	-0.10071
	153.797	-0.07324		153.812	-0.09155
	153.906	-0.05188		153.938	-0.0824
	154	-0.02136		154	-0.0885
	154.109	-0.04272		154.125	-0.09155
	154.203	-0.03662		154.188	-0.10681
	154.297	-0.05798		154.312	-0.09766
	154.406	-0.06104		154.438	-0.07935
	154.5	-0.04272		154.5	-0.10376
	154.609	-0.03052		154.625	-0.09766
	154.703	-0.02441		154.688	-0.07324
	154.797	-0.05798		154.812	-0.07324
	154.906	-0.05798		154.938	-0.10071
	155	-0.06409		155	-0.0824
	155.109	-0.04578		155.125	-0.09766
	155.203	-0.07019		155.188	-0.07019
	155.297	-0.06714		155.312	-0.03662
	155.406	-0.07324		155.438	-0.0946
	155.5	-0.08545		155.5	-0.07019
	155.609	-0.03967		155.625	-0.06104
	155.703	-0.07935		155.688	-0.0885
	155.797	-0.07019		155.812	-0.08545
	155.906	-0.07935		155.938	-0.07935
	156	-0.07324		156	-0.09766
	156.109	-0.07629		156.125	-0.10376
	156.203	-0.07019		156.188	-0.0885
	156.297	-0.06409		156.312	-0.06409
	156.406	-0.07019		156.438	-0.07629
	156.5	-0.06409		156.5	-0.09766
	156.609	-0.05798		156.625	-0.07324
	156.703	-0.05798		156.688	-0.06714
	156.797	-0.07629		156.812	-0.0824
	156.906	-0.05188		156.938	-0.10986
	157	-0.03357		157	-0.0885
	157.109	-0.01526		157.125	-0.09155
	157.203	-0.03357		157.188	-0.07019
	157.297	-0.03662		157.312	-0.07935
	157.406	-0.02441		157.438	-0.07629
	157.5	-0.04578		157.5	-0.07324
	157.609	-0.04883		157.625	-0.07019
	157.703	-0.03662		157.688	-0.06104
	157.797	-0.02136		157.812	-0.07935
	157.906	-0.01221		157.938	-0.10071
	158	-0.02441		158	-0.07935
	158.109	-0.03967		158.125	-0.05798
	158.203	-0.0061		158.188	-0.0885
	158.297	-0.03052		158.312	-0.10681
	158.406	0.01526		158.438	-0.07935
	158.5	0.0061		158.5	-0.0824
	158.609	0.01221		158.625	-0.0885
	158.703	0.0061		158.688	-0.11597
	158.797	-0.01831		158.812	-0.11597
	158.906	-0.0061		158.938	-0.07935
	159	-0.00916		159	-0.0885
	159.109	0		159.125	-0.07629
	159.203	-0.04578		159.188	-0.10376
	159.297	-0.02136		159.312	-0.10681
	159.406	-0.03967		159.438	-0.13733
	159.5	-0.06714		159.5	-0.15869
	159.609	-0.02441		159.625	-0.14038
	159.703	-0.01221		159.688	-0.12817
	159.797	-0.04272		159.812	-0.13123
	159.906	-0.06409		159.938	-0.11597
	160	-0.09155		160	-0.13123
	160.109	-0.0824		160.125	-0.15564
	160.203	-0.06714		160.188	-0.14343
	160.297	-0.07019		160.312	-0.13428
	160.406	-0.0885		160.438	-0.12512
	160.5	-0.11597		160.5	-0.10071
	160.609	-0.11292		160.625	-0.11292
	160.703	-0.10071		160.688	-0.12512
	160.797	-0.10376		160.812	-0.10376
	160.906	-0.11902		160.938	-0.12817
	161	-0.13123		161	-0.11902
	161.109	-0.10681		161.125	-0.10986
	161.203	-0.11292		161.188	-0.10681
	161.297	-0.11292		161.312	-0.10071
	161.406	-0.10681		161.438	-0.09155
	161.5	-0.14648		161.5	-0.07324
	161.609	-0.14038		161.625	-0.09766
	161.703	-0.10986		161.688	-0.07019
	161.797	-0.13123		161.812	-0.07324
	161.906	-0.14648		161.938	-0.07324
	162	-0.13428		162	-0.05188
	162.109	-0.14648		162.125	-0.05798
	162.203	-0.09155		162.188	-0.03967
	162.297	-0.07935		162.312	-0.04883
	162.406	-0.07019		162.438	-0.04578
	162.5	-0.11292		162.5	-0.05798
	162.609	-0.07935		162.625	-0.02136
	162.703	-0.0824		162.688	-0.04883
	162.797	-0.0946		162.812	-0.02136
	162.906	-0.11902		162.938	-0.04272
	163	-0.0885		163	-0.03967
	163.109	-0.05798		163.125	-0.02136
	163.203	-0.07019		163.188	-0.01831
	163.297	-0.07019		163.312	-0.02136
	163.406	-0.0885		163.438	-0.02747
	163.5	-0.07324		163.5	-0.04272
	163.609	-0.09155		163.625	-0.03967
	163.703	-0.06104		163.688	-0.03662
	163.797	-0.06714		163.812	-0.06409
	163.906	-0.05798		163.938	-0.06409
	164	-0.05798		164	-0.05188
	164.109	-0.07629		164.125	-0.05493
	164.203	-0.10986		164.188	-0.05188
	164.297	-0.07629		164.312	-0.05493
	164.406	-0.10071		164.438	-0.04578
	164.5	-0.10071		164.5	-0.04578
	164.609	-0.0885		164.625	-0.03662
	164.703	-0.07629		164.688	-0.05493
	164.797	-0.10986		164.812	-0.06104
	164.906	-0.10376		164.938	-0.04883
	165	-0.11292		165	-0.07324
	165.109	-0.0824		165.125	-0.06104
	165.203	-0.0824		165.188	-0.05798
	165.297	-0.0824		165.312	-0.02441
	165.406	-0.0885		165.438	-0.02136
	165.5	-0.0885		165.5	-0.02747
	165.609	-0.09766		165.625	-0.04578
	165.703	-0.0946		165.688	-0.07324
	165.797	-0.0824		165.812	-0.05798
	165.906	-0.09155		165.938	-0.06714
	166	-0.07629		166	-0.06104
	166.109	-0.06714		166.125	-0.09155
	166.203	-0.0885		166.188	-0.07629
	166.297	-0.07935		166.312	-0.07324
	166.406	-0.10071		166.438	-0.03357
	166.5	-0.09155		166.5	-0.01221
	166.609	-0.07324		166.625	-0.03052
	166.703	-0.07629		166.688	-0.05493
	166.797	-0.07019		166.812	-0.04883
	166.906	-0.07629		166.938	-0.06714
	167	-0.10986		167	-0.07324
	167.109	-0.10071		167.125	-0.07019
	167.203	-0.10071		167.188	-0.06714
	167.297	-0.10071		167.312	-0.04578
	167.406	-0.09766		167.438	-0.04578
	167.5	-0.12817		167.5	-0.06409
	167.609	-0.14038		167.625	-0.05188
	167.703	-0.14343		167.688	-0.07324
	167.797	-0.11597		167.812	-0.06104
	167.906	-0.12817		167.938	-0.07019
	168	-0.0824		168	-0.05798
	168.109	-0.10376		168.125	-0.0885
	168.203	-0.11597		168.188	-0.08545
	168.297	-0.0885		168.312	-0.07629
	168.406	-0.10376		168.438	-0.06409
	168.5	-0.11597		168.5	-0.09155
	168.609	-0.12817		168.625	-0.05798
	168.703	-0.13733		168.688	-0.03662
	168.797	-0.11292		168.812	-0.05188
	168.906	-0.10986		168.938	-0.04883
	169	-0.0946		169	-0.03052
	169.109	-0.08545		169.125	-0.03662
	169.203	-0.10376		169.188	-0.03052
	169.297	-0.06714		169.312	-0.00916
	169.406	-0.05493		169.438	-0.04578
	169.5	-0.0824		169.5	-0.03967
	169.609	-0.07935		169.625	-0.02747
	169.703	-0.09155		169.688	-0.03052
	169.797	-0.05798		169.812	-0.01221
	169.906	-0.04578		169.938	-0.03052
	170	-0.05188		170	-0.03052
	170.109	-0.07629		170.125	0.01526
	170.203	-0.05188		170.188	0.01221
	170.297	-0.03662		170.312	0.01221
	170.406	-0.05188		170.438	0.00916
	170.5	-0.03357		170.5	0.00305
	170.609	-0.01831		170.625	-0.02747
	170.703	-0.01831		170.688	-0.01221
	170.797	-0.03662		170.812	-0.02441
	170.906	-0.04578		170.938	-0.02136
	171	-0.02136		171	-0.02747
	171.109	-0.02136		171.125	-0.06104
	171.203	-0.03052		171.188	-0.04883
	171.297	-0.05798		171.312	-0.05188
	171.406	-0.04883		171.438	-0.03967
	171.5	-0.03967		171.5	-0.04578
	171.609	-0.01221		171.625	-0.06409
	171.703	-0.03967		171.688	-0.09766
	171.797	-0.01831		171.812	-0.0885
	171.906	-0.04272		171.938	-0.0885
	172	-0.01831		172	-0.04578
	172.109	-0.05493		172.125	-0.06409
	172.203	-0.02136		172.188	-0.07629
	172.297	-0.03052		172.312	-0.07629
	172.406	-0.02441		172.438	-0.09155
	172.5	-0.04272		172.5	-0.10071
	172.609	-0.05493		172.625	-0.10376
	172.703	-0.04272		172.688	-0.10071
	172.797	-0.03967		172.812	-0.09155
	172.906	-0.04578		172.938	-0.10071
	173	-0.05188		173	-0.11597
	173.109	-0.04272		173.125	-0.11597
	173.203	-0.04883		173.188	-0.0946
	173.297	-0.06409		173.312	-0.11597
	173.406	-0.07629		173.438	-0.09155
	173.5	-0.05188		173.5	-0.09766
	173.609	-0.05798		173.625	-0.11902
	173.703	-0.07324		173.688	-0.0946
	173.797	-0.05798		173.812	-0.09766
	173.906	-0.05188		173.938	-0.0946
	174	-0.03052		174	-0.07019
	174.109	-0.02136		174.125	-0.10376
	174.203	-0.06104		174.188	-0.0885
	174.297	-0.01526		174.312	-0.09155
	174.406	-0.04578		174.438	-0.10071
	174.5	-0.04883		174.5	-0.10681
	174.609	-0.07935		174.625	-0.11292
	174.703	-0.05798		174.688	-0.09155
	174.797	-0.03052		174.812	-0.10681
	174.906	-0.06714		174.938	-0.09155
	175	-0.05798		175	-0.08545
	175.109	-0.07629		175.125	-0.07324
	175.203	-0.07935		175.188	-0.06714
	175.297	-0.07629		175.312	-0.07629
	175.406	-0.06714		175.438	-0.05798
	175.5	-0.0824		175.5	-0.10071
	175.609	-0.03967		175.625	-0.12207
	175.703	-0.06409		175.688	-0.11597
	175.797	-0.07019		175.812	-0.10376
	175.906	-0.07629		175.938	-0.10681
	176	-0.0824		176	-0.10071
	176.109	-0.08545		176.125	-0.07935
	176.203	-0.10376		176.188	-0.10376
	176.297	-0.06714		176.312	-0.11292
	176.406	-0.07324		176.438	-0.08545
	176.5	-0.05798		176.5	-0.10071
	176.609	-0.07019		176.625	-0.11597
	176.703	-0.07324		176.688	-0.09766
	176.797	-0.07629		176.812	-0.10681
	176.906	-0.08545		176.938	-0.07019
	177	-0.06714		177	-0.06104
	177.109	-0.04578		177.125	-0.10986
	177.203	-0.04883		177.188	-0.08545
	177.297	-0.03357		177.312	-0.0885
	177.406	-0.02747		177.438	-0.0824
	177.5	-0.04272		177.5	-0.07019
	177.609	-0.01221		177.625	-0.06409
	177.703	-0.00916		177.688	-0.07629
	177.797	-0.06409		177.812	-0.06409
	177.906	-0.05188		177.938	-0.0946
	178	-0.01526		178	-0.09155
	178.109	-0.03662		178.125	-0.05798
	178.203	-0.01526		178.188	-0.07629
	178.297	-0.02136		178.312	-0.05798
	178.406	-0.01526		178.438	-0.10376
	178.5	-0.02747		178.5	-0.11597
	178.609	-0.04883		178.625	-0.11597
	178.703	-0.02441		178.688	-0.08545
	178.797	-0.06104		178.812	-0.07324
	178.906	-0.03662		178.938	-0.09155
	179	-0.04272		179	-0.0885
	179.109	-0.04883		179.125	-0.10376
	179.203	-0.04578		179.188	-0.0946
	179.297	-0.03357		179.312	-0.0946
	179.406	-0.04272		179.438	-0.07019
	179.5	-0.04883		179.5	-0.08545
	179.609	-0.03052		179.625	-0.0946
	179.703	-0.06104		179.688	-0.10071
	179.797	-0.03052		179.812	-0.08545
	179.906	-0.07324		179.938	-0.11292
	180	-0.07629		180	-0.11292
	180.109	-0.07324		180.125	-0.12207
	180.203	-0.0885		180.188	-0.13428
	180.297	-0.10071		180.312	-0.12512
	180.406	-0.11292		180.438	-0.11597
	180.5	-0.10681		180.5	-0.09766
	180.609	-0.13733		180.625	-0.10071
	180.703	-0.13123		180.688	-0.11902
	180.797	-0.0885		180.812	-0.13123
	180.906	-0.10681		180.938	-0.14038
	181	-0.11597		181	-0.13428
	181.109	-0.13733		181.125	-0.11292
	181.203	-0.10681		181.188	-0.0946
	181.297	-0.12207		181.312	-0.10681
	181.406	-0.12207		181.438	-0.07629
	181.5	-0.0885		181.5	-0.09155
	181.609	-0.0946		181.625	-0.0946
	181.703	-0.13428		181.688	-0.06104
	181.797	-0.12817		181.812	-0.09155
	181.906	-0.12512		181.938	-0.0824
	182	-0.11292		182	-0.07324
	182.109	-0.10071		182.125	-0.05798
	182.203	-0.13428		182.188	-0.06104
	182.297	-0.08545		182.312	-0.05188
	182.406	-0.10071		182.438	-0.05188
	182.5	-0.12817		182.5	-0.03662
	182.609	-0.12207		182.625	-0.03662
	182.703	-0.13733		182.688	-0.01831
	182.797	-0.07324		182.812	-0.02747
	182.906	-0.10376		182.938	-0.02136
	183	-0.08545		183	-0.03357
	183.109	-0.07629		183.125	-0.03662
	183.203	-0.09766		183.188	-0.03662
	183.297	-0.0885		183.312	-0.01221
	183.406	-0.07019		183.438	-0.01831
	183.5	-0.06409		183.5	-0.01221
	183.609	-0.07935		183.625	-0.01221
	183.703	-0.0946		183.688	-0.01831
	183.797	-0.0885		183.812	-0.04272
	183.906	-0.08545		183.938	-0.05798
	184	-0.11292		184	-0.0824
	184.109	-0.13123		184.125	-0.06714
	184.203	-0.10376		184.188	-0.04272
	184.297	-0.10986		184.312	-0.04883
	184.406	-0.10986		184.438	-0.05188
	184.5	-0.11292		184.5	-0.04272
	184.609	-0.07935		184.625	-0.02136
	184.703	-0.09766		184.688	-0.03967
	184.797	-0.0885		184.812	-0.06409
	184.906	-0.07324		184.938	-0.07019
	185	-0.07629		185	-0.04272
	185.109	-0.06104		185.125	-0.06104
	185.203	-0.07935		185.188	-0.03967
	185.297	-0.05798		185.312	-0.04883
	185.406	-0.08545		185.438	-0.04272
	185.5	-0.0946		185.5	-0.05798
	185.609	-0.07935		185.625	-0.04272
	185.703	-0.07019		185.688	-0.03967
	185.797	-0.06714		185.812	-0.04883
	185.906	-0.07019		185.938	-0.05493
	186	-0.06104		186	-0.07324
	186.109	-0.0946		186.125	-0.05798
	186.203	-0.07019		186.188	-0.06409
	186.297	-0.08545		186.312	-0.06409
	186.406	-0.12207		186.438	-0.07629
	186.5	-0.0885		186.5	-0.07629
	186.609	-0.06409		186.625	-0.07324
	186.703	-0.09155		186.688	-0.07629
	186.797	-0.08545		186.812	-0.07935
	186.906	-0.0824		186.938	-0.07324
	187	-0.06409		187	-0.07019
	187.109	-0.10681		187.125	-0.03967
	187.203	-0.11597		187.188	-0.03662
	187.297	-0.10071		187.312	-0.03967
	187.406	-0.11597		187.438	-0.07019
	187.5	-0.10376		187.5	-0.07935
	187.609	-0.13733		187.625	-0.0885
	187.703	-0.15564		187.688	-0.08545
	187.797	-0.12512		187.812	-0.06409
	187.906	-0.0885		187.938	-0.07324
	188	-0.10071		188	-0.09155
	188.109	-0.13428		188.125	-0.04883
	188.203	-0.13428		188.188	-0.05188
	188.297	-0.13428		188.312	-0.05493
	188.406	-0.12817		188.438	-0.05798
	188.5	-0.12512		188.5	-0.05188
	188.609	-0.09155		188.625	-0.06104
	188.703	-0.13428		188.688	-0.06714
	188.797	-0.13733		188.812	-0.06409
	188.906	-0.12207		188.938	-0.07935
	189	-0.07935		189	-0.06714
	189.109	-0.0824		189.125	-0.08545
	189.203	-0.03357		189.188	-0.04578
	189.297	-0.07019		189.312	-0.02747
	189.406	-0.10071		189.438	-0.03052
	189.5	-0.09155		189.5	0
	189.609	-0.08545		189.625	-0.00916
	189.703	-0.07629		189.688	0.0061
	189.797	-0.06104		189.812	0.01221
	189.906	-0.06409		189.938	-0.01526
	190	-0.06714		190	-0.02441
	190.109	-0.0946		190.125	0
	190.203	-0.05493		190.188	0.00305
	190.297	-0.05188		190.312	-0.02136
	190.406	-0.06104		190.438	-0.01831
	190.5	-0.08545		190.5	-0.03052
	190.609	-0.03967		190.625	-0.03662
	190.703	-0.03967		190.688	-0.05493
	190.797	-0.03357		190.812	-0.05493
	190.906	-0.03662		190.938	-0.05493
	191	-0.03357		191	-0.07324
	191.109	-0.05188		191.125	-0.03357
	191.203	-0.06714		191.188	-0.04578
	191.297	-0.04272		191.312	-0.04578
	191.406	-0.03967		191.438	-0.05188
	191.5	-0.04883		191.5	-0.04883
	191.609	-0.04272		191.625	-0.06409
	191.703	-0.04272		191.688	-0.06104
	191.797	-0.03967		191.812	-0.08545
	191.906	-0.03052		191.938	-0.09155
	192	-0.02136		192	-0.0824
	192.109	-0.03662		192.125	-0.0824
	192.203	-0.03967		192.188	-0.11292
	192.297	-0.03967		192.312	-0.13733
	192.406	-0.02747		192.438	-0.11902
	192.5	-0.04578		192.5	-0.0946
	192.609	-0.03662		192.625	-0.08545
	192.703	-0.03357		192.688	-0.10376
	192.797	-0.04883		192.812	-0.12817
	192.906	-0.07019		192.938	-0.13733
	193	-0.10681		193	-0.12817
	193.109	-0.06104		193.125	-0.10376
	193.203	-0.0824		193.188	-0.09155
	193.297	-0.03662		193.312	-0.0946
	193.406	-0.06409		193.438	-0.11597
	193.5	-0.0824		193.5	-0.11292
	193.609	-0.06714		193.625	-0.10376
	193.703	-0.0885		193.688	-0.10071
	193.797	-0.07019		193.812	-0.11292
	193.906	-0.0946		193.938	-0.10681
	194	-0.0946		194	-0.10986
	194.109	-0.0885		194.125	-0.11292
	194.203	-0.04272		194.188	-0.09155
	194.297	-0.03662		194.312	-0.0946
	194.406	-0.03662		194.438	-0.0885
	194.5	-0.04578		194.5	-0.09155
	194.609	-0.05798		194.625	-0.09155
	194.703	-0.05188		194.688	-0.06409
	194.797	-0.06104		194.812	-0.07629
	194.906	-0.06104		194.938	-0.08545
	195	-0.07324		195	-0.06409
	195.109	-0.06714		195.125	-0.07019
	195.203	-0.05188		195.188	-0.07629
	195.297	-0.06714		195.312	-0.10071
	195.406	-0.06409		195.438	-0.08545
	195.5	-0.05188		195.5	-0.09155
	195.609	-0.07324		195.625	-0.08545
	195.703	-0.07935		195.688	-0.10071
	195.797	-0.07935		195.812	-0.07629
	195.906	-0.0946		195.938	-0.0946
	196	-0.07019		196	-0.10681
	196.109	-0.05188		196.125	-0.0946
	196.203	-0.07935		196.188	-0.07629
	196.297	-0.06714		196.312	-0.09766
	196.406	-0.06714		196.438	-0.10986
	196.5	-0.09155		196.5	-0.0885
	196.609	-0.07324		196.625	-0.10376
	196.703	-0.0946		196.688	-0.10071
	196.797	-0.0824		196.812	-0.0885
	196.906	-0.05798		196.938	-0.06714
	197	-0.07019		197	-0.06104
	197.109	-0.06104		197.125	-0.04272
	197.203	-0.03967		197.188	-0.07324
	197.297	-0.01831		197.312	-0.05798
	197.406	-0.01831		197.438	-0.05798
	197.5	-0.04578		197.5	-0.07019
	197.609	-0.03357		197.625	-0.07629
	197.703	-0.03357		197.688	-0.05798
	197.797	-0.00916		197.812	-0.06409
	197.906	-0.02747		197.938	-0.09155
	198	-0.02136		198	-0.09155
	198.109	-0.04578		198.125	-0.09155
	198.203	0.0061		198.188	-0.10376
	198.297	-0.00305		198.312	-0.07324
	198.406	-0.01526		198.438	-0.06714
	198.5	-0.00305		198.5	-0.08545
	198.609	-0.00916		198.625	-0.08545
	198.703	-0.05188		198.688	-0.06714
	198.797	-0.03662		198.812	-0.0885
	198.906	-0.01526		198.938	-0.07629
	199	-0.04272		199	-0.09766
	199.109	-0.04578		199.125	-0.10986
	199.203	-0.05798		199.188	-0.10376
	199.297	-0.05493		199.312	-0.0946
	199.406	-0.03967		199.438	-0.11597
	199.5	-0.04272		199.5	-0.10681
[truncated: 48,005 more rows]

## Sheet: Figure 6 E ii
	Figure 6 E ii up							Figure 6 E ii bottom
	CMUS
	acsf			2-APB
	Time(ms)	Voltage (mv)		Time(ms)	Voltage (mv)			Time(min)	Firing rate(Hz)
	0	-0.04425		0	-0.12054			0.223	1.27055
	0.10938	-0.03204		0.125	-0.12054			0.446	1.27055
	0.20313	-0.02441		0.25	-0.11292			0.669	1.04634
	0.3125	-0.02594		0.3125	-0.11749			0.892	1.42003
	0.40625	-0.02594		0.4375	-0.11902			1.115	1.27055
	0.5	-0.02899		0.5	-0.12207			1.338	1.34529
	0.60938	-0.03662		0.625	-0.12665			1.561	1.27055
	0.70313	-0.03052		0.75	-0.12665			1.784	1.42003
	0.8125	-0.02594		0.8125	-0.10834			2.007	1.42003
	0.90625	-0.03052		0.9375	-0.08392			2.23	1.42003
	1	-0.05798		1	-0.0885			2.453	1.34529
	1.10938	-0.06866		1.125	-0.07782			2.676	1.27055
	1.20313	-0.05798		1.25	-0.07935			2.899	1.42003
	1.3125	-0.06256		1.3125	-0.09155			3.122	1.42003
	1.40625	-0.05951		1.4375	-0.07324			3.345	1.34529
	1.5	-0.0412		1.5	-0.06561			3.568	1.34529
	1.60938	-0.03204		1.625	-0.06714			3.791	1.42003
	1.70313	-0.05493		1.75	-0.05798			4.014	1.42003
	1.8125	-0.06714		1.8125	-0.06256			4.237	1.42003
	1.90625	-0.05798		1.9375	-0.06256			4.46	1.49477
	2	-0.06561		2	-0.03662			4.683	1.42003
	2.10938	-0.07324		2.125	-0.0473			4.906	1.42003
	2.20313	-0.05951		2.25	-0.06409			5.129	1.49477
	2.3125	-0.05646		2.3125	-0.06256			5.352	1.42003
	2.40625	-0.05646		2.4375	-0.06866			5.575	1.49477
	2.5	-0.05798		2.5	-0.06866			5.798	1.42003
	2.60938	-0.07019		2.625	-0.06561			6.021	1.34529
	2.70313	-0.06256		2.75	-0.05646			6.244	1.42003
	2.8125	-0.04425		2.8125	-0.05035			6.467	1.42003
	2.90625	-0.04272		2.9375	-0.05188			6.69	1.49477
	3	-0.0473		3	-0.05493			6.913	1.42003
	3.10938	-0.04883		3.125	-0.04883			7.136	1.49477
	3.20313	-0.0412		3.25	-0.04272			7.359	1.42003
	3.3125	-0.01526		3.3125	-0.04883			7.582	1.34529
	3.40625	-0.00458		3.4375	-0.05341			7.805	1.56951
	3.5	-0.00153		3.5	-0.05493			8.028	1.42003
	3.60938	-0.00305		3.625	-0.07477			8.251	1.42003
	3.70313	0.00916		3.75	-0.07629			8.474	1.34529
	3.8125	0.0061		3.8125	-0.0946			8.697	1.49477
	3.90625	-0.01068		3.9375	-0.09766			8.92	1.49477
	4	-0.02594		4	-0.08545			9.143	1.42003
	4.10938	-0.04425		4.125	-0.07324			9.366	1.34529
	4.20313	-0.03967		4.25	-0.07782			9.589	1.42003
	4.3125	-0.04425		4.3125	-0.06256			9.812	1.49477
	4.40625	-0.04883		4.4375	-0.07477			10.035	1.42003
	4.5	-0.02899		4.5	-0.05951			10.258	1.19581
	4.60938	-0.02899		4.625	-0.04578			10.481	1.27055
	4.70313	-0.01068		4.75	-0.03967			10.704	1.34529
	4.8125	-0.01526		4.8125	-0.0351			10.927	1.34529
	4.90625	-0.00916		4.9375	-0.05341			11.15	1.34529
	5	-0.00305		5	-0.05951			11.373	1.34529
	5.10938	0.00153		5.125	-0.06866			11.596	1.27055
	5.20313	-0.01678		5.25	-0.06104			11.819	1.34529
	5.3125	-0.03357		5.3125	-0.05646			12.042	1.19581
	5.40625	-0.03052		5.4375	-0.04425			12.265	1.19581
	5.5	-0.03662		5.5	-0.06866			12.488	1.19581
	5.60938	-0.05035		5.625	-0.08698			12.711	1.19581
	5.70313	-0.06561		5.75	-0.07172			12.934	1.12108
	5.8125	-0.05341		5.8125	-0.09003			13.157	1.27055
	5.90625	-0.07935		5.9375	-0.10834			13.38	1.27055
	6	-0.07782		6	-0.09918			13.603	1.19581
	6.10938	-0.08545		6.125	-0.09155			13.826	1.12108
	6.20313	-0.0885		6.25	-0.09003			14.049	1.12108
	6.3125	-0.08698		6.3125	-0.09766			14.272	1.12108
	6.40625	-0.09766		6.4375	-0.10376			14.495	1.19581
	6.5	-0.09918		6.5	-0.10986			14.718	1.34529
	6.60938	-0.09003		6.625	-0.10834			14.941	1.27055
	6.70313	-0.0946		6.75	-0.10834			15.164	1.12108
	6.8125	-0.0946		6.8125	-0.12817			15.387	1.42003
	6.90625	-0.12207		6.9375	-0.11597			15.61	1.42003
	7	-0.11597		7	-0.10834			15.833	1.42003
	7.10938	-0.11902		7.125	-0.10986			16.056	1.42003
	7.20313	-0.13123		7.25	-0.11749			16.279	1.49477
	7.3125	-0.1236		7.3125	-0.12665			16.502	1.49477
	7.40625	-0.12207		7.4375	-0.12665			16.725	1.56951
	7.5	-0.11597		7.5	-0.10681			16.948	1.49477
	7.60938	-0.1236		7.625	-0.10681			17.171	1.56951
	7.70313	-0.11902		7.75	-0.09003			17.394	1.49477
	7.8125	-0.10681		7.8125	-0.0824			17.617	1.56951
	7.90625	-0.10529		7.9375	-0.08698			17.84	1.56951
	8	-0.10376		8	-0.09308			18.063	1.56951
	8.10938	-0.10071		8.125	-0.09766			18.286	1.49477
	8.20313	-0.09613		8.25	-0.08087			18.509	1.49477
	8.3125	-0.10376		8.3125	-0.07324			18.732	1.71898
	8.40625	-0.0946		8.4375	-0.05341			18.955	1.64425
	8.5	-0.10071		8.5	-0.04272			19.178	1.71898
	8.60938	-0.10071		8.625	-0.03967			19.401	1.56951
	8.70313	-0.09003		8.75	-0.04883			19.624	1.56951
	8.8125	-0.08087		8.8125	-0.03357			19.847	1.42003
	8.90625	-0.08698		8.9375	-0.03967			20.07	1.64425
	9	-0.09613		9	-0.03815			20.293	1.42003
	9.10938	-0.07324		9.125	-0.03052			20.516	1.49477
	9.20313	-0.06714		9.25	-0.01373			20.739	1.49477
	9.3125	-0.06714		9.3125	-0.0061			20.962	1.42003
	9.40625	-0.08545		9.4375	-0.01984			21.185	1.42003
	9.5	-0.09003		9.5	-0.00305			21.408	1.42003
	9.60938	-0.08087		9.625	-0.02441			21.631	1.56951
	9.70313	-0.06256		9.75	-0.0351			21.854	1.27055
	9.8125	-0.05646		9.8125	-0.02594			22.077	1.42003
	9.90625	-0.05493		9.9375	-0.02594			22.3	1.49477
	10	-0.07019		10	-0.03052
	10.1094	-0.04883		10.125	-0.01984
	10.2031	-0.06256		10.25	-0.00916
	10.3125	-0.03967		10.3125	-0.01526
	10.4062	-0.04272		10.4375	-0.01373
	10.5	-0.03967		10.5	-0.01831
	10.6094	-0.02747		10.625	0
	10.7031	-0.02747		10.75	-0.00763
	10.8125	-0.02594		10.8125	0.02441
	10.9062	-0.03357		10.9375	0.01526
	11	-0.04578		11	-0.00305
	11.1094	-0.05646		11.125	0
	11.2031	-0.0473		11.25	-0.02594
	11.3125	-0.06561		11.3125	-0.03967
	11.4062	-0.06104		11.4375	-0.0473
	11.5	-0.05951		11.5	-0.03204
	11.6094	-0.05951		11.625	-0.03815
	11.7031	-0.06866		11.75	-0.03052
	11.8125	-0.06409		11.8125	-0.03815
	11.9062	-0.05188		11.9375	-0.05341
	12	-0.04425		12	-0.05341
	12.1094	-0.03815		12.125	-0.06409
	12.2031	-0.06714		12.25	-0.05951
	12.3125	-0.05341		12.3125	-0.04883
	12.4062	-0.06409		12.4375	-0.04425
	12.5	-0.05035		12.5	-0.05951
	12.6094	-0.07935		12.625	-0.05493
	12.7031	-0.07477		12.75	-0.06104
	12.8125	-0.06714		12.8125	-0.07782
	12.9062	-0.06866		12.9375	-0.08087
	13	-0.07477		13	-0.07782
	13.1094	-0.09918		13.125	-0.07477
	13.2031	-0.10834		13.25	-0.05493
	13.3125	-0.09918		13.3125	-0.02289
	13.4062	-0.10376		13.4375	-0.04578
	13.5	-0.11597		13.5	-0.04425
	13.6094	-0.11749		13.625	-0.03204
	13.7031	-0.11444		13.75	-0.03357
	13.8125	-0.11139		13.8125	-0.03815
	13.9062	-0.10834		13.9375	-0.04272
	14	-0.11139		14	-0.04272
	14.1094	-0.07019		14.125	-0.05646
	14.2031	-0.07935		14.25	-0.04883
	14.3125	-0.07629		14.3125	-0.05035
	14.4062	-0.11292		14.4375	-0.05035
	14.5	-0.11597		14.5	-0.04578
	14.6094	-0.13733		14.625	-0.03204
	14.7031	-0.12817		14.75	-0.03967
	14.8125	-0.10986		14.8125	-0.0473
	14.9062	-0.11749		14.9375	-0.05493
	15	-0.09613		15	-0.07019
	15.1094	-0.0885		15.125	-0.04578
	15.2031	-0.08698		15.25	-0.04425
	15.3125	-0.09155		15.3125	-0.04272
	15.4062	-0.09613		15.4375	-0.03967
	15.5	-0.09613		15.5	-0.04425
	15.6094	-0.07629		15.625	-0.05646
	15.7031	-0.07477		15.75	-0.05493
	15.8125	-0.05798		15.8125	-0.05188
	15.9062	-0.06256		15.9375	-0.03967
	16	-0.06561		16	-0.05341
	16.1094	-0.05951		16.125	-0.06714
	16.2031	-0.05493		16.25	-0.04578
	16.3125	-0.04425		16.3125	-0.05035
	16.4062	-0.03052		16.4375	-0.03815
	16.5	-0.01984		16.5	-0.0412
	16.6094	-0.00458		16.625	-0.04578
	16.7031	-0.01526		16.75	-0.00763
	16.8125	0.00305		16.8125	-0.00916
	16.9062	0		16.9375	-0.00153
	17	-0.02594		17	0.00305
	17.1094	-0.02441		17.125	0.02136
	17.2031	-0.00763		17.25	0.01678
	17.3125	-0.00458		17.3125	0.00458
	17.4062	-0.01526		17.4375	-0.01221
	17.5	-0.03357		17.5	-0.03052
	17.6094	-0.03662		17.625	-0.0473
	17.7031	-0.02594		17.75	-0.04272
	17.8125	-0.02441		17.8125	-0.01221
	17.9062	-0.01221		17.9375	-0.02441
	18	-0.01068		18	-0.01831
	18.1094	-0.01373		18.125	-0.04883
	18.2031	-0.01984		18.25	-0.04883
	18.3125	-0.01831		18.3125	-0.05341
	18.4062	-0.01373		18.4375	-0.05341
	18.5	-0.02899		18.5	-0.05646
	18.6094	-0.02747		18.625	-0.07172
	18.7031	-0.01373		18.75	-0.07935
	18.8125	-0.01678		18.8125	-0.08545
	18.9062	-0.02441		18.9375	-0.06866
	19	-0.02899		19	-0.07324
	19.1094	-0.03967		19.125	-0.07629
	19.2031	-0.03662		19.25	-0.07782
	19.3125	-0.02747		19.3125	-0.07477
	19.4062	-0.0351		19.4375	-0.07172
	19.5	-0.04425		19.5	-0.07477
	19.6094	-0.03815		19.625	-0.07935
	19.7031	-0.0351		19.75	-0.09155
	19.8125	-0.03052		19.8125	-0.10681
	19.9062	-0.03204		19.9375	-0.0946
	20	-0.03967		20	-0.0824
	20.1094	-0.04578		20.125	-0.07935
	20.2031	-0.05035		20.25	-0.08698
	20.3125	-0.03967		20.3125	-0.07782
	20.4062	-0.07172		20.4375	-0.07019
	20.5	-0.09766		20.5	-0.07324
	20.6094	-0.10223		20.625	-0.08698
	20.7031	-0.0824		20.75	-0.09155
	20.8125	-0.05341		20.8125	-0.09613
	20.9062	-0.0473		20.9375	-0.10071
	21	-0.05646		21	-0.09003
	21.1094	-0.05341		21.125	-0.0946
	21.2031	-0.06256		21.25	-0.09155
	21.3125	-0.06714		21.3125	-0.07935
	21.4062	-0.07019		21.4375	-0.07477
	21.5	-0.05951		21.5	-0.07324
	21.6094	-0.07477		21.625	-0.06866
	21.7031	-0.06866		21.75	-0.0885
	21.8125	-0.07935		21.8125	-0.06714
	21.9062	-0.06409		21.9375	-0.06256
	22	-0.07629		22	-0.05951
	22.1094	-0.07935		22.125	-0.06409
	22.2031	-0.07172		22.25	-0.04578
	22.3125	-0.09003		22.3125	-0.06409
	22.4062	-0.07935		22.4375	-0.08392
	22.5	-0.06409		22.5	-0.08392
	22.6094	-0.05798		22.625	-0.07172
	22.7031	-0.05341		22.75	-0.07019
	22.8125	-0.05341		22.8125	-0.09155
	22.9062	-0.05798		22.9375	-0.10376
	23	-0.0473		23	-0.08698
	23.1094	-0.03967		23.125	-0.08698
	23.2031	-0.05341		23.25	-0.0824
	23.3125	-0.05035		23.3125	-0.07477
	23.4062	-0.05188		23.4375	-0.06104
	23.5	-0.02441		23.5	-0.0412
	23.6094	-0.02289		23.625	-0.05188
	23.7031	-0.01526		23.75	-0.05798
	23.8125	-0.0351		23.8125	-0.05035
	23.9062	-0.03357		23.9375	-0.0824
	24	-0.01068		24	-0.07324
	24.1094	-0.00458		24.125	-0.05951
	24.2031	-0.00305		24.25	-0.05341
	24.3125	0.01068		24.3125	-0.05341
	24.4062	0.01526		24.4375	-0.03662
	24.5	0.01373		24.5	-0.03815
	24.6094	0.01984		24.625	-0.04578
	24.7031	0.02289		24.75	-0.03357
	24.8125	0.02441		24.8125	-0.04425
	24.9062	0		24.9375	-0.04578
	25	-0.00305		25	-0.05798
	25.1094	0.00305		25.125	-0.04272
	25.2031	-0.01373		25.25	-0.03204
	25.3125	-0.03052		25.3125	-0.03815
	25.4062	-0.00916		25.4375	-0.07782
	25.5	-0.02441		25.5	-0.08087
	25.6094	-0.04272		25.625	-0.07935
	25.7031	-0.03662		25.75	-0.07477
	25.8125	-0.04578		25.8125	-0.08392
	25.9062	-0.05951		25.9375	-0.07782
	26	-0.06409		26	-0.07782
	26.1094	-0.06866		26.125	-0.07019
	26.2031	-0.06561		26.25	-0.09766
	26.3125	-0.07935		26.3125	-0.11749
	26.4062	-0.06714		26.4375	-0.1236
	26.5	-0.08087		26.5	-0.10986
	26.6094	-0.07172		26.625	-0.0885
	26.7031	-0.09918		26.75	-0.08392
	26.8125	-0.08545		26.8125	-0.08392
	26.9062	-0.11139		26.9375	-0.09766
	27	-0.13275		27	-0.11597
	27.1094	-0.11902		27.125	-0.12054
	27.2031	-0.14038		27.25	-0.1236
	27.3125	-0.13733		27.3125	-0.11749
	27.4062	-0.12665		27.4375	-0.09155
	27.5	-0.11749		27.5	-0.08545
	27.6094	-0.10681		27.625	-0.10223
	27.7031	-0.10071		27.75	-0.08392
	27.8125	-0.11292		27.8125	-0.07782
	27.9062	-0.1297		27.9375	-0.08698
	28	-0.10376		28	-0.0885
	28.1094	-0.10071		28.125	-0.09308
	28.2031	-0.07629		28.25	-0.06866
	28.3125	-0.07935		28.3125	-0.05493
	28.4062	-0.10529		28.4375	-0.07019
	28.5	-0.07935		28.5	-0.06409
	28.6094	-0.05951		28.625	-0.0885
	28.7031	-0.06714		28.75	-0.07629
	28.8125	-0.06256		28.8125	-0.06104
	28.9062	-0.05341		28.9375	-0.05188
	29	-0.04578		29	-0.0412
	29.1094	-0.06104		29.125	-0.02899
	29.2031	-0.05035		29.25	-0.00763
	29.3125	-0.05951		29.3125	-0.0061
	29.4062	-0.07782		29.4375	-0.0061
	29.5	-0.0824		29.5	-0.01068
	29.6094	-0.08087		29.625	-0.00153
	29.7031	-0.08698		29.75	-0.0061
	29.8125	-0.07629		29.8125	-0.00916
	29.9062	-0.07172		29.9375	-0.0061
	30	-0.05951		30	-0.01984
	30.1094	-0.06561		30.125	-0.01068
	30.2031	-0.06561		30.25	0.00305
	30.3125	-0.06866		30.3125	0.01068
	30.4062	-0.07782		30.4375	0.01221
	30.5	-0.0885		30.5	0.01068
	30.6094	-0.09155		30.625	-0.00763
	30.7031	-0.0885		30.75	-0.00763
	30.8125	-0.07629		30.8125	-0.00763
	30.9062	-0.05646		30.9375	-0.01526
	31	-0.05646		31	-0.02289
	31.1094	-0.05493		31.125	-0.02289
	31.2031	-0.05493		31.25	-0.01984
	31.3125	-0.05951		31.3125	-0.01373
	31.4062	-0.05646		31.4375	-0.01068
	31.5	-0.05341		31.5	-0.01373
	31.6094	-0.05646		31.625	-0.0061
	31.7031	-0.05341		31.75	-0.02594
	31.8125	-0.04578		31.8125	-0.02747
	31.9062	-0.05035		31.9375	-0.02136
	32	-0.03967		32	-0.02289
	32.1094	-0.03052		32.125	-0.01984
	32.2031	-0.03204		32.25	-0.04272
	32.3125	-0.02594		32.3125	-0.06714
	32.4062	-0.03204		32.4375	-0.06714
	32.5	-0.0412		32.5	-0.06866
	32.6094	-0.0473		32.625	-0.05951
	32.7031	-0.04883		32.75	-0.07782
	32.8125	-0.06866		32.8125	-0.08087
	32.9062	-0.07477		32.9375	-0.07324
	33	-0.08545		33	-0.06866
	33.1094	-0.08545		33.125	-0.06256
	33.2031	-0.06409		33.25	-0.06256
	33.3125	-0.06409		33.3125	-0.0473
	33.4062	-0.07477		33.4375	-0.05035
	33.5	-0.06409		33.5	-0.05188
	33.6094	-0.06714		33.625	-0.06561
	33.7031	-0.0824		33.75	-0.07019
	33.8125	-0.06256		33.8125	-0.06866
	33.9062	-0.06409		33.9375	-0.06256
	34	-0.06256		34	-0.05951
	34.1094	-0.06409		34.125	-0.05493
	34.2031	-0.08392		34.25	-0.07935
	34.3125	-0.11292		34.3125	-0.07935
	34.4062	-0.13123		34.4375	-0.09003
	34.5	-0.12207		34.5	-0.08392
	34.6094	-0.12207		34.625	-0.07019
	34.7031	-0.10681		34.75	-0.07629
	34.8125	-0.10071		34.8125	-0.05493
	34.9062	-0.11292		34.9375	-0.06866
	35	-0.11597		35	-0.06714
	35.1094	-0.10681		35.125	-0.07019
	35.2031	-0.08392		35.25	-0.05035
	35.3125	-0.0885		35.3125	-0.06409
	35.4062	-0.09918		35.4375	-0.05646
	35.5	-0.0946		35.5	-0.02747
	35.6094	-0.0946		35.625	-0.0351
	35.7031	-0.07935		35.75	-0.03662
	35.8125	-0.05646		35.8125	-0.0473
	35.9062	-0.05493		35.9375	-0.02441
	36	-0.06104		36	-0.02289
	36.1094	-0.04578		36.125	-0.00763
	36.2031	-0.03815		36.25	-0.01373
	36.3125	-0.05188		36.3125	-0.02136
	36.4062	-0.05341		36.4375	-0.02441
	36.5	-0.03815		36.5	-0.02747
	36.6094	-0.03204		36.625	-0.01831
	36.7031	-0.02747		36.75	-0.03204
	36.8125	-0.0412		36.8125	-0.0061
	36.9062	-0.02594		36.9375	-0.01984
	37	-0.01068		37	-0.01831
	37.1094	0.00153		37.125	-0.02136
	37.2031	-0.01526		37.25	-0.02136
	37.3125	-0.0061		37.3125	-0.02136
	37.4062	-0.01068		37.4375	-0.03204
	37.5	-0.02899		37.5	-0.02441
	37.6094	-0.00458		37.625	-0.01373
	37.7031	-0.0061		37.75	-0.00305
	37.8125	0		37.8125	-0.0061
	37.9062	-0.0061		37.9375	-0.00305
	38	-0.0061		38	-0.00763
	38.1094	-0.00763		38.125	-0.01984
	38.2031	-0.00153		38.25	-0.0061
	38.3125	0.01221		38.3125	-0.01221
	38.4062	0.00305		38.4375	-0.03357
	38.5	-0.00305		38.5	-0.06714
	38.6094	-0.01984		38.625	-0.08545
	38.7031	-0.0351		38.75	-0.09003
	38.8125	-0.03967		38.8125	-0.0885
	38.9062	-0.03204		38.9375	-0.09155
	39	-0.01221		39	-0.08698
	39.1094	-0.00153		39.125	-0.11749
	39.2031	-0.01678		39.25	-0.1236
	39.3125	-0.02747		39.3125	-0.11902
	39.4062	-0.04425		39.4375	-0.10681
	39.5	-0.05798		39.5	-0.09308
	39.6094	-0.06256		39.625	-0.09918
	39.7031	-0.06561		39.75	-0.08698
	39.8125	-0.07019		39.8125	-0.09155
	39.9062	-0.07324		39.9375	-0.0946
	40	-0.06714		40	-0.09613
	40.1094	-0.06866		40.125	-0.10529
	40.2031	-0.08545		40.25	-0.10681
	40.3125	-0.06714		40.3125	-0.09918
	40.4062	-0.05951		40.4375	-0.0946
	40.5	-0.04883		40.5	-0.08392
	40.6094	-0.04883		40.625	-0.09308
	40.7031	-0.03967		40.75	-0.10986
	40.8125	-0.04883		40.8125	-0.10834
	40.9062	-0.04883		40.9375	-0.10986
	41	-0.04425		41	-0.10681
	41.1094	-0.06409		41.125	-0.11292
	41.2031	-0.07324		41.25	-0.09918
	41.3125	-0.05646		41.3125	-0.08545
	41.4062	-0.05493		41.4375	-0.08545
	41.5	-0.06714		41.5	-0.09308
	41.6094	-0.06866		41.625	-0.09766
	41.7031	-0.0946		41.75	-0.07782
	41.8125	-0.09003		41.8125	-0.0946
	41.9062	-0.07935		41.9375	-0.09155
	42	-0.07629		42	-0.08087
	42.1094	-0.08698		42.125	-0.06866
	42.2031	-0.07172		42.25	-0.06714
	42.3125	-0.06104		42.3125	-0.06256
	42.4062	-0.04578		42.4375	-0.06714
	42.5	-0.06409		42.5	-0.0824
	42.6094	-0.06409		42.625	-0.07019
	42.7031	-0.05493		42.75	-0.06714
	42.8125	-0.06561		42.8125	-0.05951
	42.9062	-0.07477		42.9375	-0.05798
	43	-0.07172		43	-0.05951
	43.1094	-0.06561		43.125	-0.06561
	43.2031	-0.05646		43.25	-0.07172
	43.3125	-0.04425		43.3125	-0.06256
	43.4062	-0.04425		43.4375	-0.04883
	43.5	-0.05493		43.5	-0.05188
	43.6094	-0.04425		43.625	-0.06409
	43.7031	-0.0412		43.75	-0.0412
	43.8125	-0.04883		43.8125	-0.04578
	43.9062	-0.02441		43.9375	-0.03204
	44	-0.02594		44	-0.02747
	44.1094	-0.01373		44.125	-0.05951
	44.2031	0		44.25	-0.06256
	44.3125	0.02747		44.3125	-0.04883
	44.4062	0.00763		44.4375	-0.04883
	44.5	0.01221		44.5	-0.05035
	44.6094	0.01526		44.625	-0.0351
	44.7031	0.00763		44.75	-0.05035
	44.8125	0.00916		44.8125	-0.06409
	44.9062	0.01221		44.9375	-0.07629
	45	0.01678		45	-0.0824
	45.1094	0.01068		45.125	-0.09766
	45.2031	0.00305		45.25	-0.09308
	45.3125	-0.01068		45.3125	-0.09155
	45.4062	-0.01831		45.4375	-0.08545
	45.5	-0.0351		45.5	-0.0946
	45.6094	-0.02441		45.625	-0.08698
	45.7031	-0.0351		45.75	-0.08545
	45.8125	-0.06561		45.8125	-0.07172
	45.9062	-0.08087		45.9375	-0.07935
	46	-0.07935		46	-0.06714
	46.1094	-0.07172		46.125	-0.08087
	46.2031	-0.06409		46.25	-0.09003
	46.3125	-0.05951		46.3125	-0.07935
	46.4062	-0.06714		46.4375	-0.08087
	46.5	-0.07172		46.5	-0.08545
	46.6094	-0.08545		46.625	-0.10223
	46.7031	-0.09308		46.75	-0.10223
	46.8125	-0.09003		46.8125	-0.10986
	46.9062	-0.08392		46.9375	-0.10681
	47	-0.09613		47	-0.12207
	47.1094	-0.10529		47.125	-0.11749
	47.2031	-0.10376		47.25	-0.14038
	47.3125	-0.0946		47.3125	-0.1297
	47.4062	-0.09918		47.4375	-0.09155
	47.5	-0.10986		47.5	-0.0885
	47.6094	-0.11597		47.625	-0.09308
	47.7031	-0.12054		47.75	-0.09155
	47.8125	-0.11292		47.8125	-0.07782
	47.9062	-0.1358		47.9375	-0.08087
	48	-0.1358		48	-0.0824
	48.1094	-0.12054		48.125	-0.08392
	48.2031	-0.11444		48.25	-0.0824
	48.3125	-0.11749		48.3125	-0.08392
	48.4062	-0.10376		48.4375	-0.06866
	48.5	-0.10681		48.5	-0.05035
	48.6094	-0.0946		48.625	-0.0473
	48.7031	-0.10376		48.75	-0.0351
	48.8125	-0.08087		48.8125	-0.03052
	48.9062	-0.07324		48.9375	-0.0412
	49	-0.07477		49	-0.04425
	49.1094	-0.07629		49.125	-0.05035
	49.2031	-0.05951		49.25	-0.03815
	49.3125	-0.05798		49.3125	-0.03815
	49.4062	-0.05951		49.4375	-0.03204
	49.5	-0.07629		49.5	-0.03052
	49.6094	-0.07477		49.625	-0.00916
	49.7031	-0.07324		49.75	-0.01373
	49.8125	-0.06256		49.8125	-0.01526
	49.9062	-0.05646		49.9375	-0.01678
	50	-0.05951		50	-0.02441
	50.1094	-0.06866		50.125	-0.00916
	50.2031	-0.06714		50.25	-0.01526
	50.3125	-0.07782		50.3125	-0.01068
	50.4062	-0.0824		50.4375	-0.00763
	50.5	-0.08392		50.5	-0.00916
	50.6094	-0.08087		50.625	-0.01678
	50.7031	-0.07019		50.75	-0.03815
	50.8125	-0.05341		50.8125	-0.03357
	50.9062	-0.04425		50.9375	-0.02594
	51	-0.03204		51	-0.03967
	51.1094	-0.03204		51.125	-0.02594
	51.2031	-0.03662		51.25	-0.02747
	51.3125	-0.03967		51.3125	-0.02594
	51.4062	-0.05035		51.4375	-0.03052
	51.5	-0.04883		51.5	-0.02747
	51.6094	-0.04883		51.625	-0.01984
	51.7031	-0.0473		51.75	-0.04272
	51.8125	-0.06256		51.8125	-0.0351
	51.9062	-0.05341		51.9375	-0.0412
	52	-0.05035		52	-0.03967
	52.1094	-0.0412		52.125	-0.0412
	52.2031	-0.0351		52.25	-0.0412
	52.3125	-0.04272		52.3125	-0.03815
	52.4062	-0.03052		52.4375	-0.02594
	52.5	-0.03815		52.5	-0.02441
	52.6094	-0.04425		52.625	-0.04425
	52.7031	-0.04272		52.75	-0.04425
	52.8125	-0.03204		52.8125	-0.04578
	52.9062	-0.04425		52.9375	-0.0473
	53	-0.03967		53	-0.05798
	53.1094	-0.04272		53.125	-0.06104
	53.2031	-0.05188		53.25	-0.06866
	53.3125	-0.06409		53.3125	-0.06104
	53.4062	-0.07477		53.4375	-0.07477
	53.5	-0.09003		53.5	-0.0824
	53.6094	-0.09613		53.625	-0.08087
	53.7031	-0.08545		53.75	-0.07935
	53.8125	-0.09613		53.8125	-0.07629
	53.9062	-0.0824		53.9375	-0.06409
	54	-0.0885		54	-0.05035
	54.1094	-0.0885		54.125	-0.05646
	54.2031	-0.08545		54.25	-0.05035
	54.3125	-0.08698		54.3125	-0.03815
	54.4062	-0.10223		54.4375	-0.0473
	54.5	-0.10986		54.5	-0.03815
	54.6094	-0.11292		54.625	-0.0412
	54.7031	-0.12207		54.75	-0.05798
	54.8125	-0.12207		54.8125	-0.06409
	54.9062	-0.12512		54.9375	-0.07019
	55	-0.13123		55	-0.06409
	55.1094	-0.12512		55.125	-0.06866
	55.2031	-0.10986		55.25	-0.07782
	55.3125	-0.0824		55.3125	-0.07019
	55.4062	-0.0946		55.4375	-0.06714
	55.5	-0.09155		55.5	-0.05493
	55.6094	-0.08087		55.625	-0.04272
	55.7031	-0.07324		55.75	-0.03357
	55.8125	-0.07629		55.8125	-0.0412
	55.9062	-0.08545		55.9375	-0.03815
	56	-0.05646		56	-0.02136
	56.1094	-0.06866		56.125	-0.0351
	56.2031	-0.05188		56.25	-0.04578
	56.3125	-0.05035		56.3125	-0.01526
	56.4062	-0.0473		56.4375	-0.01373
	56.5	-0.04578		56.5	-0.01221
	56.6094	-0.02747		56.625	-0.01373
	56.7031	0		56.75	-0.02594
	56.8125	0.01984		56.8125	-0.03052
	56.9062	0.01373		56.9375	-0.00763
	57	0.01221		57	-0.00763
	57.1094	-0.01526		57.125	-0.01068
	57.2031	-0.02136		57.25	-0.03967
	57.3125	-0.01831		57.3125	-0.03357
	57.4062	-0.00916		57.4375	-0.01984
	57.5	-0.01373		57.5	-0.02747
	57.6094	-0.01068		57.625	-0.03815
	57.7031	0.00458		57.75	-0.03052
	57.8125	0.00763		57.8125	-0.03662
	57.9062	-0.00458		57.9375	-0.05341
	58	-0.01526		58	-0.05798
	58.1094	-0.01526		58.125	-0.05188
	58.2031	-0.01831		58.25	-0.04883
	58.3125	-0.01678		58.3125	-0.06866
	58.4062	-0.01678		58.4375	-0.07324
	58.5	-0.01831		58.5	-0.09766
	58.6094	-0.01984		58.625	-0.09766
	58.7031	-0.01221		58.75	-0.10223
	58.8125	-0.03052		58.8125	-0.10834
	58.9062	-0.05188		58.9375	-0.11597
	59	-0.03967		59	-0.10071
	59.1094	-0.02289		59.125	-0.11139
	59.2031	-0.03967		59.25	-0.11902
	59.3125	-0.0351		59.3125	-0.1236
	59.4062	-0.03204		59.4375	-0.12054
	59.5	-0.0473		59.5	-0.11139
	59.6094	-0.04883		59.625	-0.10529
	59.7031	-0.0473		59.75	-0.10681
	59.8125	-0.05493		59.8125	-0.10681
	59.9062	-0.06409		59.9375	-0.10376
	60	-0.07477		60	-0.10223
	60.1094	-0.06866		60.125	-0.09308
	60.2031	-0.06866		60.25	-0.10681
	60.3125	-0.05798		60.3125	-0.09918
	60.4062	-0.05493		60.4375	-0.10223
	60.5	-0.05493		60.5	-0.09308
	60.6094	-0.0473		60.625	-0.08087
	60.7031	-0.0473		60.75	-0.05493
	60.8125	-0.05493		60.8125	-0.06104
	60.9062	-0.0351		60.9375	-0.07019
	61	-0.05035		61	-0.06409
	61.1094	-0.06256		61.125	-0.07324
	61.2031	-0.05951		61.25	-0.07629
	61.3125	-0.05646		61.3125	-0.08392
	61.4062	-0.05188		61.4375	-0.07935
	61.5	-0.06256		61.5	-0.08087
	61.6094	-0.07324		61.625	-0.07935
	61.7031	-0.09003		61.75	-0.08392
	61.8125	-0.08698		61.8125	-0.08698
	61.9062	-0.07477		61.9375	-0.0824
	62	-0.06256		62	-0.06866
	62.1094	-0.07935		62.125	-0.05646
	62.2031	-0.09613		62.25	-0.06104
	62.3125	-0.09308		62.3125	-0.07477
	62.4062	-0.07324		62.4375	-0.08545
	62.5	-0.05951		62.5	-0.06104
	62.6094	-0.05035		62.625	-0.06561
	62.7031	-0.04272		62.75	-0.05798
	62.8125	-0.02899		62.8125	-0.05951
	62.9062	-0.02899		62.9375	-0.07172
	63	-0.03662		63	-0.06561
	63.1094	-0.04425		63.125	-0.07172
	63.2031	-0.02899		63.25	-0.07172
	63.3125	-0.02441		63.3125	-0.05493
	63.4062	-0.02594		63.4375	-0.05035
	63.5	-0.03204		63.5	-0.05798
	63.6094	-0.03967		63.625	-0.05798
	63.7031	-0.03662		63.75	-0.05646
	63.8125	-0.00916		63.8125	-0.05188
	63.9062	-0.01678		63.9375	-0.03357
	64	-0.01831		64	-0.05035
	64.1094	-0.01984		64.125	-0.02747
	64.2031	-0.01678		64.25	-0.03815
	64.3125	-0.02289		64.3125	-0.03967
	64.4062	-0.02136		64.4375	-0.03052
	64.5	-0.02594		64.5	-0.02747
	64.6094	-0.01373		64.625	-0.03357
	64.7031	-0.00916		64.75	-0.03357
	64.8125	-0.01831		64.8125	-0.04578
	64.9062	-0.00458		64.9375	-0.06561
	65	-0.01831		65	-0.07019
	65.1094	-0.00916		65.125	-0.06561
	65.2031	-0.01221		65.25	-0.06714
	65.3125	-0.01678		65.3125	-0.06104
	65.4062	0.00153		65.4375	-0.07629
	65.5	0		65.5	-0.09613
	65.6094	-0.02136		65.625	-0.09155
	65.7031	-0.02441		65.75	-0.09613
	65.8125	-0.01678		65.8125	-0.06409
	65.9062	-0.0412		65.9375	-0.05951
	66	-0.04425		66	-0.06561
	66.1094	-0.01526		66.125	-0.08545
	66.2031	-0.0351		66.25	-0.09613
	66.3125	-0.05341		66.3125	-0.09918
	66.4062	-0.05341		66.4375	-0.09308
	66.5	-0.05493		66.5	-0.10681
	66.6094	-0.06866		66.625	-0.10834
	66.7031	-0.07477		66.75	-0.12665
	66.8125	-0.06866		66.8125	-0.13275
	66.9062	-0.08545		66.9375	-0.14648
	67	-0.09918		67	-0.15411
	67.1094	-0.09918		67.125	-0.13885
	67.2031	-0.10376		67.25	-0.11749
	67.3125	-0.10681		67.3125	-0.09308
	67.4062	-0.0824		67.4375	-0.07019
	67.5	-0.07629		67.5	-0.08087
	67.6094	-0.0946		67.625	-0.0946
	67.7031	-0.11292		67.75	-0.10376
	67.8125	-0.10223		67.8125	-0.10376
	67.9062	-0.08392		67.9375	-0.09155
	68	-0.09155		68	-0.08545
	68.1094	-0.10529		68.125	-0.10223
	68.2031	-0.10376		68.25	-0.08392
	68.3125	-0.13733		68.3125	-0.0946
	68.4062	-0.13885		68.4375	-0.0824
	68.5	-0.11292		68.5	-0.08392
	68.6094	-0.10071		68.625	-0.08392
	68.7031	-0.09155		68.75	-0.08087
	68.8125	-0.09003		68.8125	-0.06714
	68.9062	-0.0946		68.9375	-0.06104
	69	-0.0885		69	-0.04272
	69.1094	-0.09155		69.125	-0.02136
	69.2031	-0.08545		69.25	-0.02136
	69.3125	-0.08392		69.3125	-0.01221
	69.4062	-0.07629		69.4375	-0.00305
	69.5	-0.06561		69.5	0.00458
	69.6094	-0.05035		69.625	-0.00305
	69.7031	-0.0473		69.75	-0.00916
	69.8125	-0.05646		69.8125	-0.00916
	69.9062	-0.04883		69.9375	0.00153
	70	-0.0412		70	-0.01831
	70.1094	-0.03967		70.125	-0.02441
	70.2031	-0.05188		70.25	-0.01678
	70.3125	-0.07019		70.3125	-0.02899
	70.4062	-0.06866		70.4375	0
	70.5	-0.05646		70.5	0.00916
	70.6094	-0.04425		70.625	0.00458
	70.7031	-0.05035		70.75	-0.01831
	70.8125	-0.06409		70.8125	-0.01678
	70.9062	-0.07324		70.9375	-0.03357
	71	-0.07477		71	-0.04578
	71.1094	-0.06561		71.125	-0.05798
	71.2031	-0.0473		71.25	-0.05798
	71.3125	-0.0473		71.3125	-0.05035
	71.4062	-0.05341		71.4375	-0.0473
	71.5	-0.04272		71.5	-0.03662
	71.6094	-0.02594		71.625	-0.03052
	71.7031	-0.03815		71.75	-0.01068
	71.8125	-0.03357		71.8125	-0.02136
	71.9062	-0.02136		71.9375	-0.01984
	72	-0.04272		72	-0.03967
	72.1094	-0.05188		72.125	-0.03662
	72.2031	-0.05493		72.25	-0.03662
	72.3125	-0.04272		72.3125	-0.06409
	72.4062	-0.05188		72.4375	-0.06561
	72.5	-0.0351		72.5	-0.05493
	72.6094	-0.05035		72.625	-0.06409
	72.7031	-0.05035		72.75	-0.06104
	72.8125	-0.05798		72.8125	-0.04883
	72.9062	-0.05493		72.9375	-0.0473
	73	-0.05493		73	-0.04578
	73.1094	-0.07019		73.125	-0.05341
	73.2031	-0.05341		73.25	-0.04578
	73.3125	-0.06256		73.3125	-0.03967
	73.4062	-0.05798		73.4375	-0.02747
	73.5	-0.07172		73.5	-0.03662
	73.6094	-0.06866		73.625	-0.05493
	73.7031	-0.09613		73.75	-0.07019
	73.8125	-0.08392		73.8125	-0.07782
	73.9062	-0.09613		73.9375	-0.07477
	74	-0.08392		74	-0.0824
	74.1094	-0.0885		74.125	-0.07477
	74.2031	-0.09003		74.25	-0.08545
	74.3125	-0.10376		74.3125	-0.0824
	74.4062	-0.11139		74.4375	-0.06409
	74.5	-0.08698		74.5	-0.07477
	74.6094	-0.11749		74.625	-0.07935
	74.7031	-0.10529		74.75	-0.06409
	74.8125	-0.10681		74.8125	-0.07019
	74.9062	-0.10223		74.9375	-0.06409
	75	-0.10986		75	-0.07019
	75.1094	-0.1297		75.125	-0.07172
	75.2031	-0.12512		75.25	-0.06104
	75.3125	-0.11444		75.3125	-0.03967
	75.4062	-0.09613		75.4375	-0.03204
	75.5	-0.08545		75.5	-0.04425
	75.6094	-0.07782		75.625	-0.03815
	75.7031	-0.0885		75.75	-0.03967
	75.8125	-0.07019		75.8125	-0.04425
	75.9062	-0.05951		75.9375	-0.03662
	76	-0.07629		76	-0.03967
	76.1094	-0.04578		76.125	-0.06256
	76.2031	-0.05188		76.25	-0.04883
	76.3125	-0.03815		76.3125	-0.04272
	76.4062	-0.0473		76.4375	-0.0412
	76.5	-0.02441		76.5	-0.01984
	76.6094	-0.00305		76.625	-0.01678
	76.7031	0.00305		76.75	-0.00763
	76.8125	-0.01221		76.8125	-0.00305
	76.9062	-0.01678		76.9375	-0.00458
	77	-0.02899		77	-0.00763
	77.1094	-0.04272		77.125	-0.00305
	77.2031	-0.02899		77.25	-0.00916
	77.3125	-0.01678		77.3125	-0.01526
	77.4062	-0.01068		77.4375	-0.02136
	77.5	-0.0061		77.5	-0.02136
	77.6094	-0.00763		77.625	-0.03815
	77.7031	-0.01831		77.75	-0.0473
	77.8125	-0.02747		77.8125	-0.03357
	77.9062	-0.02136		77.9375	-0.03204
	78	-0.03815		78	-0.01831
	78.1094	-0.01678		78.125	-0.03967
	78.2031	-0.01373		78.25	-0.04883
	78.3125	-0.02289		78.3125	-0.05188
	78.4062	-0.00458		78.4375	-0.04578
	78.5	-0.00458		78.5	-0.06256
	78.6094	-0.02136		78.625	-0.04578
	78.7031	-0.02441		78.75	-0.0412
	78.8125	-0.01526		78.8125	-0.07477
	78.9062	-0.02441		78.9375	-0.07782
	79	-0.03052		79	-0.07782
	79.1094	-0.05646		79.125	-0.08698
	79.2031	-0.03815		79.25	-0.07324
	79.3125	-0.03967		79.3125	-0.08087
	79.4062	-0.02289		79.4375	-0.09155
	79.5	-0.04425		79.5	-0.10071
	79.6094	-0.05035		79.625	-0.10986
	79.7031	-0.03662		79.75	-0.11292
	79.8125	-0.0412		79.8125	-0.11902
	79.9062	-0.03815		79.9375	-0.12054
	80	-0.03967		80	-0.11444
	80.1094	-0.04425		80.125	-0.10986
	80.2031	-0.0412		80.25	-0.11444
	80.3125	-0.0412		80.3125	-0.10986
	80.4062	-0.03815		80.4375	-0.10529
	80.5	-0.06866		80.5	-0.09155
	80.6094	-0.07172		80.625	-0.10071
	80.7031	-0.09003		80.75	-0.10071
	80.8125	-0.08087		80.8125	-0.09766
	80.9062	-0.08698		80.9375	-0.09766
	81	-0.07172		81	-0.09003
	81.1094	-0.06256		81.125	-0.09155
	81.2031	-0.05798		81.25	-0.11292
	81.3125	-0.06409		81.3125	-0.11292
	81.4062	-0.07172		81.4375	-0.08698
	81.5	-0.09155		81.5	-0.09155
	81.6094	-0.10376		81.625	-0.08545
	81.7031	-0.10223		81.75	-0.07935
	81.8125	-0.0946		81.8125	-0.07324
	81.9062	-0.07782		81.9375	-0.07172
	82	-0.07019		82	-0.07019
	82.1094	-0.04425		82.125	-0.07324
	82.2031	-0.02747		82.25	-0.06561
	82.3125	-0.03815		82.3125	-0.05798
	82.4062	-0.03204		82.4375	-0.07019
	82.5	-0.03815		82.5	-0.07172
	82.6094	-0.06561		82.625	-0.04578
	82.7031	-0.05951		82.75	-0.0351
	82.8125	-0.04883		82.8125	-0.03815
	82.9062	-0.05035		82.9375	-0.0351
	83	-0.05188		83	-0.05341
	83.1094	-0.05646		83.125	-0.04883
	83.2031	-0.07477		83.25	-0.05188
	83.3125	-0.05188		83.3125	-0.03815
	83.4062	-0.04578		83.4375	-0.04425
	83.5	-0.04272		83.5	-0.0412
	83.6094	-0.03662		83.625	-0.05646
	83.7031	-0.0351		83.75	-0.04578
	83.8125	-0.02594		83.8125	-0.04578
	83.9062	-0.02289		83.9375	-0.04883
	84	-0.01068		84	-0.04578
	84.1094	0.0061		84.125	-0.04883
	84.2031	0.00763		84.25	-0.07477
	84.3125	0		84.3125	-0.07477
	84.4062	0.0061		84.4375	-0.06561
	84.5	0.00763		84.5	-0.07019
	84.6094	0.00153		84.625	-0.06104
	84.7031	0.00458		84.75	-0.06561
	84.8125	0.01831		84.8125	-0.05493
	84.9062	0.02594		84.9375	-0.06256
	85	0.00916		85	-0.07782
	85.1094	0		85.125	-0.08698
	85.2031	0.01221		85.25	-0.0824
	85.3125	0		85.3125	-0.07172
	85.4062	-0.01068		85.4375	-0.05951
	85.5	-0.00305		85.5	-0.07629
	85.6094	-0.02441		85.625	-0.07172
	85.7031	-0.00305		85.75	-0.07629
	85.8125	-0.02289		85.8125	-0.0946
	85.9062	-0.05798		85.9375	-0.10529
	86	-0.06866		86	-0.09918
	86.1094	-0.07172		86.125	-0.10071
	86.2031	-0.06409		86.25	-0.10071
	86.3125	-0.0824		86.3125	-0.11139
	86.4062	-0.07172		86.4375	-0.10986
	86.5	-0.09766		86.5	-0.10376
	86.6094	-0.09613		86.625	-0.10681
	86.7031	-0.10376		86.75	-0.11292
	86.8125	-0.09003		86.8125	-0.1236
	86.9062	-0.10529		86.9375	-0.11292
	87	-0.11444		87	-0.09766
	87.1094	-0.11902		87.125	-0.0885
	87.2031	-0.10376		87.25	-0.07935
	87.3125	-0.11292		87.3125	-0.09613
	87.4062	-0.12207		87.4375	-0.09155
	87.5	-0.10834		87.5	-0.09918
	87.6094	-0.11444		87.625	-0.09918
	87.7031	-0.11292		87.75	-0.09766
	87.8125	-0.11902		87.8125	-0.0946
	87.9062	-0.12512		87.9375	-0.09613
	88	-0.10529		88	-0.07629
	88.1094	-0.10834		88.125	-0.07172
	88.2031	-0.09155		88.25	-0.08087
	88.3125	-0.08087		88.3125	-0.08698
	88.4062	-0.0885		88.4375	-0.07629
	88.5	-0.09308		88.5	-0.05951
	88.6094	-0.0824		88.625	-0.05341
	88.7031	-0.0885		88.75	-0.04578
	88.8125	-0.08392		88.8125	-0.06256
	88.9062	-0.09155		88.9375	-0.05035
	89	-0.08545		89	-0.02594
	89.1094	-0.05188		89.125	-0.03662
	89.2031	-0.04578		89.25	-0.02441
	89.3125	-0.0412		89.3125	-0.0412
	89.4062	-0.05493		89.4375	-0.03815
	89.5	-0.05188		89.5	-0.03052
	89.6094	-0.05646		89.625	-0.00458
	89.7031	-0.06409		89.75	0.01221
	89.8125	-0.08392		89.8125	-0.0061
	89.9062	-0.08545		89.9375	-0.00153
	90	-0.06256		90	-0.0061
	90.1094	-0.06104		90.125	0.00763
	90.2031	-0.02899		90.25	0.01373
	90.3125	-0.03662		90.3125	-0.00458
	90.4062	-0.03662		90.4375	-0.01984
	90.5	-0.03357		90.5	-0.02441
	90.6094	-0.04425		90.625	-0.01526
	90.7031	-0.0473		90.75	-0.01678
	90.8125	-0.04425		90.8125	-0.01831
	90.9062	-0.0412		90.9375	-0.0351
	91	-0.04578		91	-0.03204
	91.1094	-0.05341		91.125	-0.02289
	91.2031	-0.05188		91.25	-0.02289
	91.3125	-0.06409		91.3125	-0.02289
	91.4062	-0.06104		91.4375	-0.03967
	91.5	-0.05188		91.5	-0.04578
	91.6094	-0.05341		91.625	-0.05646
	91.7031	-0.04578		91.75	-0.05035
	91.8125	-0.03815		91.8125	-0.05188
	91.9062	-0.05341		91.9375	-0.04883
	92	-0.06104		92	-0.06256
	92.1094	-0.05951		92.125	-0.04425
	92.2031	-0.05341		92.25	-0.04425
	92.3125	-0.03662		92.3125	-0.03967
	92.4062	-0.03815		92.4375	-0.06409
	92.5	-0.01678		92.5	-0.06256
	92.6094	-0.03204		92.625	-0.05035
	92.7031	-0.05035		92.75	-0.05341
	92.8125	-0.06409		92.8125	-0.06714
	92.9062	-0.06866		92.9375	-0.07172
	93	-0.06409		93	-0.07477
	93.1094	-0.0412		93.125	-0.05646
	93.2031	-0.05341		93.25	-0.04578
	93.3125	-0.06104		93.3125	-0.04883
	93.4062	-0.07019		93.4375	-0.02899
	93.5	-0.08545		93.5	-0.03052
	93.6094	-0.0885		93.625	-0.03204
	93.7031	-0.11597		93.75	-0.01984
	93.8125	-0.10376		93.8125	-0.04578
	93.9062	-0.09155		93.9375	-0.0412
	94	-0.07782		94	-0.05341
	94.1094	-0.08698		94.125	-0.06104
	94.2031	-0.09003		94.25	-0.06714
	94.3125	-0.10376		94.3125	-0.06714
	94.4062	-0.10071		94.4375	-0.06866
	94.5	-0.10223		94.5	-0.05798
	94.6094	-0.10529		94.625	-0.05493
	94.7031	-0.12512		94.75	-0.05493
	94.8125	-0.13275		94.8125	-0.05493
	94.9062	-0.12054		94.9375	-0.05646
	95	-0.14648		95	-0.06714
	95.1094	-0.14801		95.125	-0.06104
	95.2031	-0.13275		95.25	-0.05646
	95.3125	-0.10986		95.3125	-0.05951
	95.4062	-0.11139		95.4375	-0.04883
	95.5	-0.0946		95.5	-0.05035
	95.6094	-0.09308		95.625	-0.05188
	95.7031	-0.09613		95.75	-0.03815
	95.8125	-0.09155		95.8125	-0.02747
	95.9062	-0.08698		95.9375	-0.03967
	96	-0.07172		96	-0.03815
	96.1094	-0.06409		96.125	-0.01984
	96.2031	-0.03815		96.25	-0.02441
	96.3125	-0.02441		96.3125	-0.01678
	96.4062	-0.01526		96.4375	-0.01678
	96.5	-0.01373		96.5	-0.02289
	96.6094	-0.01984		96.625	-0.00916
	96.7031	-0.01526		96.75	-0.00916
	96.8125	-0.01526		96.8125	-0.00763
	96.9062	-0.01068		96.9375	-0.01678
	97	-0.01678		97	-0.02747
	97.1094	-0.0061		97.125	-0.0351
	97.2031	0.00458		97.25	-0.01221
	97.3125	-0.00458		97.3125	0.00305
	97.4062	-0.01984		97.4375	0.01221
	97.5	-0.01984		97.5	0.00153
	97.6094	-0.01068		97.625	0.00916
	97.7031	0.00458		97.75	-0.00458
	97.8125	0.00763		97.8125	-0.04883
	97.9062	0		97.9375	-0.05035
	98	-0.0061		98	-0.06409
	98.1094	-0.01221		98.125	-0.04425
	98.2031	-0.02136		98.25	-0.05798
	98.3125	-0.02136		98.3125	-0.06104
	98.4062	-0.03815		98.4375	-0.06714
	98.5	-0.03967		98.5	-0.06256
	98.6094	-0.0412		98.625	-0.06561
	98.7031	-0.03662		98.75	-0.06409
	98.8125	-0.02747		98.8125	-0.07172
	98.9062	-0.03052		98.9375	-0.0824
	99	-0.03967		99	-0.09766
	99.1094	-0.04883		99.125	-0.10681
	99.2031	-0.05035		99.25	-0.10681
	99.3125	-0.06409		99.3125	-0.10681
	99.4062	-0.07935		99.4375	-0.11292
	99.5	-0.04883		99.5	-0.12665
	99.6094	-0.03052		99.625	-0.12817
	99.7031	-0.04272		99.75	-0.13885
	99.8125	-0.05341		99.8125	-0.1236
	99.9062	-0.06561		99.9375	-0.13275
	100	-0.07019		100	-0.13733
	100.109	-0.05646		100.125	-0.09918
	100.203	-0.05646		100.25	-0.10071
	100.312	-0.05646		100.312	-0.11444
	100.406	-0.04883		100.438	-0.11292
	100.5	-0.05798		100.5	-0.12207
	100.609	-0.05493		100.625	-0.11444
	100.703	-0.03357		100.75	-0.11597
	100.812	-0.05188		100.812	-0.12207
	100.906	-0.06714		100.938	-0.11292
	101	-0.07477		101	-0.09155
	101.109	-0.06714		101.125	-0.09003
	101.203	-0.06409		101.25	-0.09918
	101.312	-0.05341		101.312	-0.09308
	101.406	-0.03815		101.438	-0.07629
	101.5	-0.0351		101.5	-0.07629
	101.609	-0.02899		101.625	-0.0824
	101.703	-0.04425		101.75	-0.08087
	101.812	-0.0473		101.812	-0.0824
	101.906	-0.05798		101.938	-0.05188
	102	-0.05188		102	-0.05035
	102.109	-0.05188		102.125	-0.04883
	102.203	-0.0824		102.25	-0.0473
	102.312	-0.06714		102.312	-0.05646
	102.406	-0.05035		102.438	-0.05341
	102.5	-0.05035		102.5	-0.07935
	102.609	-0.04425		102.625	-0.08087
	102.703	-0.03967		102.75	-0.07172
	102.812	-0.04272		102.812	-0.06866
	102.906	-0.05035		102.938	-0.0824
	103	-0.03967		103	-0.05951
	103.109	-0.04883		103.125	-0.05035
	103.203	-0.02747		103.25	-0.06866
	103.312	-0.02136		103.312	-0.07324
	103.406	-0.02136		103.438	-0.07477
	103.5	-0.01221		103.5	-0.05035
	103.609	-0.01221		103.625	-0.0412
	103.703	-0.01678		103.75	-0.0351
	103.812	-0.02289		103.812	-0.02747
	103.906	-0.01221		103.938	-0.03052
	104	-0.00153		104	-0.04272
	104.109	0.01678		104.125	-0.05798
	104.203	0.01526		104.25	-0.06256
	104.312	0.03815		104.312	-0.06714
	104.406	0.03052		104.438	-0.06866
	104.5	0.02747		104.5	-0.06866
	104.609	0.00153		104.625	-0.06256
	104.703	0.01221		104.75	-0.07629
	104.812	-0.01068		104.812	-0.06866
	104.906	-0.01068		104.938	-0.07019
	105	0.01221		105	-0.05646
	105.109	0.00153		105.125	-0.05035
	105.203	-0.00763		105.25	-0.05493
	105.312	-0.01526		105.312	-0.05798
	105.406	0		105.438	-0.05493
	105.5	-0.00763		105.5	-0.06104
	105.609	-0.02747		105.625	-0.08087
	105.703	-0.03662		105.75	-0.10376
	105.812	-0.04272		105.812	-0.10986
	105.906	-0.05646		105.938	-0.10681
	106	-0.08087		106	-0.11292
	106.109	-0.06866		106.125	-0.10376
	106.203	-0.06714		106.25	-0.08698
	106.312	-0.06409		106.312	-0.08545
	106.406	-0.07324		106.438	-0.10071
	106.5	-0.08087		106.5	-0.10223
	106.609	-0.0946		106.625	-0.10376
	106.703	-0.0885		106.75	-0.10986
	106.812	-0.0946		106.812	-0.10834
	106.906	-0.09918		106.938	-0.11292
	107	-0.08087		107	-0.10986
	107.109	-0.07629		107.125	-0.09155
	107.203	-0.07782		107.25	-0.08545
	107.312	-0.06409		107.312	-0.10071
	107.406	-0.08545		107.438	-0.09918
	107.5	-0.08545		107.5	-0.09308
	107.609	-0.08087		107.625	-0.09003
	107.703	-0.09918		107.75	-0.07935
	107.812	-0.11292		107.812	-0.0946
	107.906	-0.11139		107.938	-0.0885
	108	-0.11597		108	-0.08392
	108.109	-0.11597		108.125	-0.07324
	108.203	-0.10834		108.25	-0.05341
	108.312	-0.09918		108.312	-0.05493
	108.406	-0.07477		108.438	-0.0412
	108.5	-0.07629		108.5	-0.04272
	108.609	-0.07782		108.625	-0.02899
	108.703	-0.07935		108.75	-0.01068
	108.812	-0.07324		108.812	-0.01373
	108.906	-0.09918		108.938	-0.00916
	109	-0.11292		109	-0.03052
	109.109	-0.10071		109.125	-0.04272
	109.203	-0.08698		109.25	-0.02289
	109.312	-0.06256		109.312	-0.03052
	109.406	-0.05035		109.438	-0.03967
	109.5	-0.05035		109.5	-0.02899
	109.609	-0.03204		109.625	-0.03204
	109.703	-0.03815		109.75	-0.03052
	109.812	-0.04883		109.812	-0.01984
	109.906	-0.03815		109.938	-0.03815
	110	-0.03662		110	-0.04425
	110.109	-0.03815		110.125	-0.05035
	110.203	-0.05951		110.25	-0.03967
	110.312	-0.09003		110.312	-0.03967
	110.406	-0.07629		110.438	-0.0351
	110.5	-0.06409		110.5	-0.03204
	110.609	-0.06409		110.625	-0.03357
	110.703	-0.06256		110.75	-0.01984
	110.812	-0.06866		110.812	-0.00763
	110.906	-0.06409		110.938	-0.01831
	111	-0.06866		111	-0.03052
	111.109	-0.07477		111.125	-0.02899
	111.203	-0.05951		111.25	-0.03204
	111.312	-0.04883		111.312	-0.00763
	111.406	-0.05951		111.438	-0.02136
	111.5	-0.05951		111.5	-0.02289
	111.609	-0.06409		111.625	-0.01984
	111.703	-0.06409		111.75	-0.04578
	111.812	-0.07782		111.812	-0.05035
	111.906	-0.0946		111.938	-0.07172
	112	-0.0946		112	-0.05341
	112.109	-0.09308		112.125	-0.05188
	112.203	-0.0824		112.25	-0.06104
	112.312	-0.07324		112.312	-0.06714
	112.406	-0.06561		112.438	-0.05493
	112.5	-0.04425		112.5	-0.03815
	112.609	-0.05035		112.625	-0.02899
	112.703	-0.06104		112.75	-0.02289
	112.812	-0.05646		112.812	-0.03357
	112.906	-0.04883		112.938	-0.04578
	113	-0.0412		113	-0.04883
	113.109	-0.06866		113.125	-0.0412
	113.203	-0.06561		113.25	-0.03204
	113.312	-0.06409		113.312	-0.04272
	113.406	-0.06561		113.438	-0.04272
	113.5	-0.08698		113.5	-0.05035
	113.609	-0.10529		113.625	-0.04272
	113.703	-0.09766		113.75	-0.0412
	113.812	-0.10223		113.812	-0.05646
	113.906	-0.10376		113.938	-0.0473
	114	-0.11749		114	-0.03967
	114.109	-0.10376		114.125	-0.05493
	114.203	-0.10834		114.25	-0.04578
	114.312	-0.10986		114.312	-0.05035
	114.406	-0.12054		114.438	-0.07477
	114.5	-0.12512		114.5	-0.06256
	114.609	-0.12054		114.625	-0.08392
	114.703	-0.13275		114.75	-0.06866
	114.812	-0.11444		114.812	-0.05188
	114.906	-0.11597		114.938	-0.07629
	115	-0.11444		115	-0.06104
	115.109	-0.10529		115.125	-0.0412
	115.203	-0.10223		115.25	-0.06256
	115.312	-0.08392		115.312	-0.03967
	115.406	-0.0824		115.438	-0.05188
	115.5	-0.07935		115.5	-0.04883
	115.609	-0.08087		115.625	-0.03204
	115.703	-0.08545		115.75	-0.03967
	115.812	-0.10071		115.812	-0.04578
	115.906	-0.08087		115.938	-0.02136
	116	-0.09003		116	-0.02747
	116.109	-0.07172		116.125	-0.03662
	116.203	-0.0412		116.25	-0.02136
	116.312	-0.04578		116.312	-0.01831
	116.406	-0.04578		116.438	-0.02747
	116.5	-0.05035		116.5	0.00153
	116.609	-0.0473		116.625	-0.00458
	116.703	-0.03052		116.75	0.00305
	116.812	-0.02747		116.812	0.00916
	116.906	-0.01526		116.938	-0.01678
	117	-0.02899		117	-0.03967
	117.109	-0.03662		117.125	-0.01068
	117.203	-0.01373		117.25	-0.01068
	117.312	-0.01068		117.312	-0.01526
	117.406	-0.01221		117.438	-0.02441
	117.5	-0.00916		117.5	-0.03967
	117.609	0.01373		117.625	-0.0473
	117.703	0.0061		117.75	-0.0412
	117.812	-0.00305		117.812	-0.03815
	117.906	-0.00305		117.938	-0.03204
	118	-0.00153		118	-0.03204
	118.109	0.0061		118.125	-0.05798
	118.203	0.00153		118.25	-0.06866
	118.312	0		118.312	-0.06104
	118.406	-0.0061		118.438	-0.08087
	118.5	-0.01221		118.5	-0.06104
	118.609	-0.00305		118.625	-0.05341
	118.703	-0.00305		118.75	-0.07935
	118.812	0.01068		118.812	-0.07019
	118.906	-0.01526		118.938	-0.06104
	119	-0.03357		119	-0.07477
	119.109	-0.04272		119.125	-0.08392
	119.203	-0.05493		119.25	-0.08698
	119.312	-0.02594		119.312	-0.0885
	119.406	-0.03052		119.438	-0.0824
	119.5	-0.03204		119.5	-0.09155
	119.609	-0.03662		119.625	-0.0885
	119.703	-0.0412		119.75	-0.07172
	119.812	-0.03967		119.812	-0.07629
	119.906	-0.05341		119.938	-0.0824
	120	-0.02899		120	-0.08545
	120.109	-0.02441		120.125	-0.11139
	120.203	-0.01678		120.25	-0.12665
	120.312	-0.03815		120.312	-0.11139
	120.406	-0.05188		120.438	-0.10071
	120.5	-0.05493		120.5	-0.10834
	120.609	-0.05493		120.625	-0.12054
	120.703	-0.07172		120.75	-0.12207
	120.812	-0.06866		120.812	-0.11597
	120.906	-0.07172		120.938	-0.11292
	121	-0.07782		121	-0.09918
	121.109	-0.06256		121.125	-0.09308
	121.203	-0.06714		121.25	-0.06561
	121.312	-0.07324		121.312	-0.06104
	121.406	-0.07019		121.438	-0.05798
	121.5	-0.05951		121.5	-0.05951
	121.609	-0.06104		121.625	-0.05798
	121.703	-0.04578		121.75	-0.06714
	121.812	-0.04578		121.812	-0.07172
	121.906	-0.05798		121.938	-0.09003
	122	-0.0351		122	-0.09308
	122.109	-0.0473		122.125	-0.07782
	122.203	-0.05951		122.25	-0.07782
	122.312	-0.05646		122.312	-0.05951
	122.406	-0.05798		122.438	-0.06866
	122.5	-0.06256		122.5	-0.07172
	122.609	-0.04578		122.625	-0.06256
	122.703	-0.03204		122.75	-0.07172
	122.812	-0.05646		122.812	-0.07324
	122.906	-0.03815		122.938	-0.06256
	123	-0.05188		123	-0.07324
	123.109	-0.05646		123.125	-0.07477
	123.203	-0.04272		123.25	-0.07477
	123.312	-0.03967		123.312	-0.08545
	123.406	-0.04425		123.438	-0.06256
	123.5	-0.0473		123.5	-0.05341
	123.609	-0.02289		123.625	-0.03967
	123.703	-0.01831		123.75	-0.05341
	123.812	-0.02289		123.812	-0.05951
	123.906	-0.01373		123.938	-0.05951
	124	-0.01831		124	-0.05035
	124.109	-0.0351		124.125	-0.0473
	124.203	-0.01984		124.25	-0.07477
	124.312	-0.00458		124.312	-0.07172
	124.406	-0.01678		124.438	-0.05798
	124.5	-0.01221		124.5	-0.06256
	124.609	-0.01831		124.625	-0.07782
	124.703	-0.01984		124.75	-0.07629
	124.812	-0.02899		124.812	-0.08087
	124.906	-0.02747		124.938	-0.07935
	125	-0.02136		125	-0.07629
	125.109	-0.01068		125.125	-0.09613
	125.203	-0.01831		125.25	-0.07324
	125.312	-0.01068		125.312	-0.07172
	125.406	-0.00916		125.438	-0.07629
	125.5	-0.00458		125.5	-0.08545
	125.609	-0.01221		125.625	-0.0885
	125.703	-0.00916		125.75	-0.07629
	125.812	-0.01678		125.812	-0.07172
	125.906	-0.02441		125.938	-0.0946
	126	-0.02747		126	-0.10681
	126.109	-0.03662		126.125	-0.08698
	126.203	-0.03967		126.25	-0.0946
	126.312	-0.05646		126.312	-0.10834
	126.406	-0.06866		126.438	-0.1236
	126.5	-0.09766		126.5	-0.10529
	126.609	-0.09918		126.625	-0.10376
	126.703	-0.09613		126.75	-0.11444
	126.812	-0.10834		126.812	-0.11444
	126.906	-0.08698		126.938	-0.11444
	127	-0.10834		127	-0.12665
	127.109	-0.11597		127.125	-0.11444
	127.203	-0.11139		127.25	-0.11292
	127.312	-0.10834		127.312	-0.09308
	127.406	-0.10376		127.438	-0.10223
	127.5	-0.09766		127.5	-0.09155
	127.609	-0.09155		127.625	-0.10529
	127.703	-0.09613		127.75	-0.10834
	127.812	-0.09766		127.812	-0.10834
	127.906	-0.09766		127.938	-0.10071
	128	-0.10223		128	-0.08698
	128.109	-0.0885		128.125	-0.08698
	128.203	-0.08392		128.25	-0.07935
	128.312	-0.0824		128.312	-0.06104
	128.406	-0.08087		128.438	-0.05798
	128.5	-0.08698		128.5	-0.05035
	128.609	-0.07172		128.625	-0.04272
	128.703	-0.07324		128.75	-0.03967
	128.812	-0.07172		128.812	-0.03357
	128.906	-0.06104		128.938	-0.04272
	129	-0.07782		129	-0.02441
	129.109	-0.06714		129.125	-0.00763
	129.203	-0.06866		129.25	-0.00305
	129.312	-0.08698		129.312	-0.00305
	129.406	-0.07477		129.438	-0.01984
	129.5	-0.07324		129.5	-0.01678
	129.609	-0.06256		129.625	-0.01221
	129.703	-0.06409		129.75	-0.01984
	129.812	-0.05951		129.812	-0.02136
	129.906	-0.05646		129.938	-0.01526
	130	-0.05341		130	-0.00916
	130.109	-0.05188		130.125	0.00763
	130.203	-0.0473		130.25	0
	130.312	-0.05035		130.312	-0.02594
	130.406	-0.05646		130.438	-0.0351
	130.5	-0.05798		130.5	-0.0412
	130.609	-0.07629		130.625	-0.0351
	130.703	-0.06866		130.75	-0.02136
	130.812	-0.05798		130.812	-0.00153
	130.906	-0.05493		130.938	-0.00458
	131	-0.04272		131	0.00153
	131.109	-0.0473		131.125	-0.01831
	131.203	-0.04578		131.25	-0.03052
	131.312	-0.04425		131.312	-0.03662
	131.406	-0.0473		131.438	-0.05188
	131.5	-0.04578		131.5	-0.07935
	131.609	-0.05798		131.625	-0.07324
	131.703	-0.07019		131.75	-0.06256
	131.812	-0.04883		131.812	-0.07324
	131.906	-0.04425		131.938	-0.04272
	132	-0.05341		132	-0.03662
	132.109	-0.04425		132.125	-0.06256
	132.203	-0.02899		132.25	-0.06104
	132.312	-0.01984		132.312	-0.05646
	132.406	-0.02441		132.438	-0.06104
	132.5	-0.01678		132.5	-0.05646
	132.609	-0.02441		132.625	-0.05341
	132.703	-0.04272		132.75	-0.03357
	132.812	-0.04883		132.812	-0.04272
	132.906	-0.06104		132.938	-0.06714
	133	-0.05188		133	-0.08545
	133.109	-0.06256		133.125	-0.08698
	133.203	-0.06256		133.25	-0.09003
	133.312	-0.07172		133.312	-0.08698
	133.406	-0.09155		133.438	-0.07324
	133.5	-0.07019		133.5	-0.05798
	133.609	-0.07935		133.625	-0.05188
	133.703	-0.09155		133.75	-0.05646
	133.812	-0.08392		133.812	-0.06714
	133.906	-0.07935		133.938	-0.06409
	134	-0.08698		134	-0.06714
	134.109	-0.09613		134.125	-0.05341
	134.203	-0.0946		134.25	-0.05798
	134.312	-0.09003		134.312	-0.05646
	134.406	-0.11292		134.438	-0.0473
	134.5	-0.10986		134.5	-0.05951
	134.609	-0.09918		134.625	-0.07324
	134.703	-0.10681		134.75	-0.08087
	134.812	-0.12665		134.812	-0.05798
	134.906	-0.12817		134.938	-0.04883
	135	-0.14038		135	-0.05341
	135.109	-0.14038		135.125	-0.05341
	135.203	-0.10986		135.25	-0.06409
	135.312	-0.11597		135.312	-0.04578
	135.406	-0.11292		135.438	-0.04272
	135.5	-0.11139		135.5	-0.05188
	135.609	-0.10223		135.625	-0.04425
	135.703	-0.0946		135.75	-0.02747
	135.812	-0.07324		135.812	-0.04883
	135.906	-0.07477		135.938	-0.05646
	136	-0.07935		136	-0.04425
	136.109	-0.05798		136.125	-0.02899
	136.203	-0.05035		136.25	-0.02289
	136.312	-0.05646		136.312	-0.02136
	136.406	-0.0473		136.438	-0.03204
	136.5	-0.02289		136.5	-0.0473
	136.609	-0.0412		136.625	-0.02441
	136.703	-0.02899		136.75	-0.01526
	136.812	-0.00763		136.812	-0.02441
	136.906	-0.01526		136.938	-0.02441
	137	-0.01831		137	-0.01831
	137.109	-0.01831		137.125	-0.01221
	137.203	0.01068		137.25	-0.02289
	137.312	0.01373		137.312	-0.01984
	137.406	0.01068		137.438	-0.01678
	137.5	0.01678		137.5	-0.00916
	137.609	0.01984		137.625	-0.02594
	137.703	0.00305		137.75	-0.03052
	137.812	0.00458		137.812	-0.04883
	137.906	0.0061		137.938	-0.08087
	138	-0.0061		138	-0.04883
	138.109	0		138.125	-0.0473
	138.203	-0.0061		138.25	-0.05951
	138.312	0		138.312	-0.06104
	138.406	-0.01678		138.438	-0.06104
	138.5	-0.0351		138.5	-0.06409
	138.609	-0.02899		138.625	-0.05035
	138.703	-0.02594		138.75	-0.05188
	138.812	-0.02594		138.812	-0.05798
	138.906	-0.02747		138.938	-0.0885
	139	-0.04883		139	-0.09155
	139.109	-0.06866		139.125	-0.10681
	139.203	-0.05646		139.25	-0.11597
	139.312	-0.03815		139.312	-0.10681
	139.406	-0.03052		139.438	-0.11444
	139.5	-0.0351		139.5	-0.0946
	139.609	-0.03052		139.625	-0.08087
	139.703	-0.03204		139.75	-0.09766
	139.812	-0.02899		139.812	-0.0946
	139.906	-0.02594		139.938	-0.10376
	140	-0.02594		140	-0.11444
	140.109	-0.0351		140.125	-0.12512
	140.203	-0.03662		140.25	-0.11749
	140.312	-0.03815		140.312	-0.10529
	140.406	-0.0473		140.438	-0.08545
	140.5	-0.04425		140.5	-0.06561
	140.609	-0.05646		140.625	-0.05798
	140.703	-0.05188		140.75	-0.06714
	140.812	-0.05341		140.812	-0.08087
	140.906	-0.06104		140.938	-0.07324
	141	-0.06866		141	-0.08698
	141.109	-0.06561		141.125	-0.09155
	141.203	-0.07629		141.25	-0.08087
	141.312	-0.03967		141.312	-0.07019
	141.406	-0.04272		141.438	-0.06714
	141.5	-0.04883		141.5	-0.08698
	141.609	-0.04272		141.625	-0.09613
	141.703	-0.02747		141.75	-0.08392
	141.812	-0.05493		141.812	-0.06409
	141.906	-0.04272		141.938	-0.07324
	142	-0.06561		142	-0.06866
	142.109	-0.07782		142.125	-0.06256
	142.203	-0.0824		142.25	-0.08087
	142.312	-0.08545		142.312	-0.06866
	142.406	-0.10223		142.438	-0.06561
	142.5	-0.10071		142.5	-0.06409
	142.609	-0.08698		142.625	-0.07172
	142.703	-0.09155		142.75	-0.08545
	142.812	-0.07629		142.812	-0.09155
	142.906	-0.07324		142.938	-0.0824
	143	-0.04425		143	-0.07935
	143.109	-0.03815		143.125	-0.05951
	143.203	-0.03815		143.25	-0.05646
	143.312	-0.04883		143.312	-0.05646
	143.406	-0.04272		143.438	-0.06104
	143.5	-0.0473		143.5	-0.07172
	143.609	-0.04425		143.625	-0.06561
	143.703	-0.02136		143.75	-0.07629
	143.812	-0.01068		143.812	-0.05493
	143.906	0.00305		143.938	-0.04578
	144	0.00458		144	-0.05188
	144.109	0.01221		144.125	-0.05646
	144.203	0.00458		144.25	-0.05035
	144.312	-0.01984		144.312	-0.05493
	144.406	-0.00763		144.438	-0.05493
	144.5	-0.01221		144.5	-0.05798
	144.609	-0.00153		144.625	-0.05646
	144.703	-0.02289		144.75	-0.03204
	144.812	-0.03052		144.812	-0.05188
	144.906	-0.03357		144.938	-0.04578
	145	-0.02594		145	-0.05951
	145.109	-0.04272		145.125	-0.07477
	145.203	-0.05341		145.25	-0.09155
	145.312	-0.07172		145.312	-0.07477
	145.406	-0.06256		145.438	-0.06714
	145.5	-0.06409		145.5	-0.06561
	145.609	-0.05798		145.625	-0.07935
	145.703	-0.03357		145.75	-0.07324
	145.812	-0.03815		145.812	-0.07935
	145.906	-0.02899		145.938	-0.0946
	146	-0.03967		146	-0.10071
	146.109	-0.04578		146.125	-0.11292
	146.203	-0.06104		146.25	-0.10376
	146.312	-0.06866		146.312	-0.07019
	146.406	-0.08087		146.438	-0.07019
	146.5	-0.0824		146.5	-0.07629
	146.609	-0.0946		146.625	-0.08392
	146.703	-0.10681		146.75	-0.07172
	146.812	-0.10681		146.812	-0.10376
	146.906	-0.10071		146.938	-0.10376
	147	-0.09155		147	-0.09613
	147.109	-0.09918		147.125	-0.10681
	147.203	-0.10223		147.25	-0.10681
	147.312	-0.09918		147.312	-0.0946
	147.406	-0.10223		147.438	-0.07935
	147.5	-0.08545		147.5	-0.0885
	147.609	-0.0946		147.625	-0.11139
	147.703	-0.09155		147.75	-0.10986
	147.812	-0.08545		147.812	-0.09308
	147.906	-0.08392		147.938	-0.10529
	148	-0.08545		148	-0.10223
	148.109	-0.09613		148.125	-0.06409
	148.203	-0.11597		148.25	-0.05646
	148.312	-0.10376		148.312	-0.0351
	148.406	-0.09766		148.438	-0.04578
	148.5	-0.09613		148.5	-0.04425
	148.609	-0.09613		148.625	-0.01984
	148.703	-0.09766		148.75	-0.01984
	148.812	-0.07629		148.812	-0.03204
	148.906	-0.06561		148.938	-0.03967
	149	-0.05493		149	-0.03967
	149.109	-0.07782		149.125	-0.0412
	149.203	-0.07019		149.25	-0.01984
	149.312	-0.07935		149.312	-0.02289
	149.406	-0.07782		149.438	-0.03052
	149.5	-0.08087		149.5	-0.02899
	149.609	-0.0946		149.625	-0.01221
	149.703	-0.06714		149.75	-0.00763
	149.812	-0.05798		149.812	0.00153
	149.906	-0.06561		149.938	0.01526
	150	-0.06561		150	-0.02899
	150.109	-0.08087		150.125	-0.01526
	150.203	-0.06866		150.25	-0.01068
	150.312	-0.06866		150.312	-0.00763
	150.406	-0.06409		150.438	-0.01831
	150.5	-0.06866		150.5	-0.01373
	150.609	-0.07324		150.625	-0.01373
	150.703	-0.07019		150.75	-0.02289
	150.812	-0.06256		150.812	-0.01068
	150.906	-0.06561		150.938	-0.02289
	151	-0.05035		151	-0.03052
	151.109	-0.02594		151.125	-0.03967
	151.203	-0.03815		151.25	-0.04425
	151.312	-0.05493		151.312	-0.02899
	151.406	-0.04883		151.438	-0.01221
	151.5	-0.04883		151.5	-0.03052
	151.609	-0.04883		151.625	-0.02441
	151.703	-0.03357		151.75	-0.02136
	151.812	-0.03357		151.812	-0.03815
	151.906	-0.03204		151.938	-0.04425
	152	-0.05341		152	-0.05188
	152.109	-0.06561		152.125	-0.08545
	152.203	-0.05646		152.25	-0.06256
	152.312	-0.06409		152.312	-0.0412
	152.406	-0.04578		152.438	-0.04425
	152.5	-0.04272		152.5	-0.03967
	152.609	-0.02899		152.625	-0.05035
	152.703	-0.04425		152.75	-0.0412
	152.812	-0.05341		152.812	-0.05951
	152.906	-0.03662		152.938	-0.05341
	153	-0.05035		153	-0.05341
	153.109	-0.05798		153.125	-0.06256
	153.203	-0.06104		153.25	-0.06409
	153.312	-0.05493		153.312	-0.06409
	153.406	-0.07782		153.438	-0.05951
	153.5	-0.0824		153.5	-0.05798
	153.609	-0.09613		153.625	-0.06409
	153.703	-0.09003		153.75	-0.05493
	153.812	-0.08698		153.812	-0.05493
	153.906	-0.09308		153.938	-0.04883
	154	-0.09766		154	-0.06256
	154.109	-0.10529		154.125	-0.05951
	154.203	-0.11139		154.25	-0.04425
	154.312	-0.12817		154.312	-0.07629
	154.406	-0.1297		154.438	-0.08392
	154.5	-0.1236		154.5	-0.07629
	154.609	-0.12207		154.625	-0.08698
	154.703	-0.12817		154.75	-0.09918
	154.812	-0.14038		154.812	-0.0824
	154.906	-0.13275		154.938	-0.07782
	155	-0.13275		155	-0.07172
	155.109	-0.11597		155.125	-0.06561
	155.203	-0.12207		155.25	-0.06104
	155.312	-0.10223		155.312	-0.05646
	155.406	-0.09613		155.438	-0.04272
	155.5	-0.08698		155.5	-0.04272
	155.609	-0.08392		155.625	-0.0351
	155.703	-0.09308		155.75	-0.01984
	155.812	-0.10681		155.812	-0.02136
	155.906	-0.09766		155.938	-0.01984
	156	-0.0824		156	-0.02594
	156.109	-0.06256		156.125	-0.02899
	156.203	-0.05188		156.25	-0.02136
	156.312	-0.0473		156.312	-0.01831
	156.406	-0.02289		156.438	-0.02899
	156.5	-0.02136		156.5	-0.0351
	156.609	-0.01373		156.625	-0.04883
	156.703	-0.03662		156.75	-0.03815
	156.812	-0.03815		156.812	-0.03052
	156.906	-0.03662		156.938	-0.02289
	157	-0.00916		157	-0.02289
	157.109	-0.01373		157.125	-0.01373
	157.203	-0.01984		157.25	-0.00916
	157.312	-0.02289		157.312	-0.00763
	157.406	-0.01221		157.438	0.01831
	157.5	0		157.5	-0.01068
	157.609	0.00458		157.625	-0.04883
	157.703	0		157.75	-0.03204
	157.812	-0.00763		157.812	-0.04578
	157.906	-0.00458		157.938	-0.04578
	158	-0.0061		158	-0.04883
	158.109	-0.0061		158.125	-0.05951
	158.203	0.01831		158.25	-0.07172
	158.312	0.00305		158.312	-0.05493
	158.406	-0.02594		158.438	-0.05341
	158.5	-0.02136		158.5	-0.06714
	158.609	-0.03815		158.625	-0.06714
	158.703	-0.04578		158.75	-0.07477
	158.812	-0.05035		158.812	-0.07019
	158.906	-0.02441		158.938	-0.0824
	159	-0.03204		159	-0.07172
	159.109	-0.03052		159.125	-0.06256
	159.203	-0.02594		159.25	-0.07324
	159.312	-0.03204		159.312	-0.08392
	159.406	-0.0351		159.438	-0.10223
	159.5	-0.03662		159.5	-0.11902
	159.609	-0.03662		159.625	-0.13123
	159.703	-0.03662		159.75	-0.12665
	159.812	-0.02899		159.812	-0.11597
	159.906	-0.03967		159.938	-0.12665
	160	-0.04883		160	-0.12512
	160.109	-0.05493		160.125	-0.09613
	160.203	-0.04425		160.25	-0.08698
	160.312	-0.04578		160.312	-0.07782
	160.406	-0.02747		160.438	-0.07019
	160.5	-0.02289		160.5	-0.07019
	160.609	-0.01373		160.625	-0.07782
	160.703	-0.03204		160.75	-0.08087
	160.812	-0.05035		160.812	-0.06866
	160.906	-0.03967		160.938	-0.07629
	161	-0.03967		161	-0.09155
	161.109	-0.04272		161.125	-0.09155
	161.203	-0.04425		161.25	-0.09003
	161.312	-0.04272		161.312	-0.0885
	161.406	-0.05035		161.438	-0.09613
	161.5	-0.0473		161.5	-0.0885
	161.609	-0.03967		161.625	-0.08392
	161.703	-0.05341		161.75	-0.08392
	161.812	-0.05188		161.812	-0.08698
	161.906	-0.05493		161.938	-0.08392
	162	-0.0473		162	-0.08087
	162.109	-0.04578		162.125	-0.09003
	162.203	-0.05951		162.25	-0.08087
	162.312	-0.06866		162.312	-0.08698
	162.406	-0.06714		162.438	-0.06866
	162.5	-0.04883		162.5	-0.06256
	162.609	-0.05493		162.625	-0.05035
	162.703	-0.05646		162.75	-0.05646
	162.812	-0.05035		162.812	-0.05188
	162.906	-0.05341		162.938	-0.04425
	163	-0.05798		163	-0.04883
	163.109	-0.05493		163.125	-0.0473
	163.203	-0.05188		163.25	-0.06714
	163.312	-0.05188		163.312	-0.08087
	163.406	-0.0473		163.438	-0.07172
	163.5	-0.04578		163.5	-0.05493
	163.609	-0.02441		163.625	-0.06714
	163.703	-0.01831		163.75	-0.06866
	163.812	-0.01221		163.812	-0.06561
	163.906	-0.02594		163.938	-0.04578
	164	-0.01678		164	-0.0473
	164.109	-0.00305		164.125	-0.05035
	164.203	-0.00458		164.25	-0.0473
	164.312	-0.00305		164.312	-0.04578
	164.406	0.0061		164.438	-0.04425
	164.5	0.01068		164.5	-0.04578
	164.609	0.01678		164.625	-0.03204
	164.703	0.01984		164.75	-0.04425
	164.812	-0.0061		164.812	-0.07477
	164.906	-0.01678		164.938	-0.07629
	165	-0.00458		165	-0.08087
	165.109	-0.00763		165.125	-0.07782
	165.203	-0.00305		165.25	-0.07477
	165.312	0.02136		165.312	-0.07324
	165.406	0.00916		165.438	-0.0885
	165.5	0.01526		165.5	-0.07782
	165.609	0.00305		165.625	-0.07477
	165.703	-0.00916		165.75	-0.07172
	165.812	-0.02594		165.812	-0.07782
	165.906	-0.03204		165.938	-0.08392
	166	-0.04883		166	-0.08545
	166.109	-0.06104		166.125	-0.06104
	166.203	-0.05188		166.25	-0.07172
	166.312	-0.05188		166.312	-0.08545
	166.406	-0.04425		166.438	-0.0946
	166.5	-0.05951		166.5	-0.11597
	166.609	-0.05951		166.625	-0.11902
	166.703	-0.07172		166.75	-0.12512
	166.812	-0.08698		166.812	-0.11597
	166.906	-0.10376		166.938	-0.10834
	167	-0.09918		167	-0.09766
	167.109	-0.11749		167.125	-0.10376
	167.203	-0.11597		167.25	-0.10071
	167.312	-0.11444		167.312	-0.11444
	167.406	-0.10376		167.438	-0.10071
	167.5	-0.10834		167.5	-0.0885
	167.609	-0.11292		167.625	-0.09766
	167.703	-0.10529		167.75	-0.09308
	167.812	-0.11139		167.812	-0.08545
	167.906	-0.0946		167.938	-0.06866
	168	-0.09918		168	-0.06104
	168.109	-0.09155		168.125	-0.08545
	168.203	-0.10376		168.25	-0.06866
	168.312	-0.11749		168.312	-0.07324
	168.406	-0.11902		168.438	-0.07324
	168.5	-0.10986		168.5	-0.05646
	168.609	-0.10834		168.625	-0.04883
	168.703	-0.10376		168.75	-0.05646
	168.812	-0.08545		168.812	-0.04883
	168.906	-0.08392		168.938	-0.03204
	169	-0.06256		169	-0.04883
	169.109	-0.06256		169.125	-0.03662
	169.203	-0.06714		169.25	-0.02899
	169.312	-0.07629		169.312	-0.01831
	169.406	-0.06714		169.438	-0.03662
	169.5	-0.07782		169.5	-0.03662
	169.609	-0.07629		169.625	-0.03204
	169.703	-0.07629		169.75	-0.0351
	169.812	-0.07477		169.812	-0.01373
	169.906	-0.06256		169.938	-0.02289
	170	-0.07629		170	-0.01221
	170.109	-0.06104		170.125	-0.02747
	170.203	-0.06561		170.25	-0.02594
	170.312	-0.05646		170.312	-0.02899
	170.406	-0.05951		170.438	-0.03204
	170.5	-0.06561		170.5	-0.05341
	170.609	-0.05341		170.625	-0.05188
	170.703	-0.05035		170.75	-0.05188
	170.812	-0.05341		170.812	-0.03662
	170.906	-0.05188		170.938	-0.02289
	171	-0.04272		171	-0.03052
	171.109	-0.05188		171.125	-0.02441
	171.203	-0.05493		171.25	-0.02747
	171.312	-0.06561		171.312	-0.0351
	171.406	-0.06866		171.438	-0.01984
	171.5	-0.06409		171.5	-0.0061
	171.609	-0.05493		171.625	-0.02747
	171.703	-0.05035		171.75	-0.03052
	171.812	-0.06866		171.812	-0.01984
	171.906	-0.0473		171.938	-0.04578
	172	-0.03967		172	-0.05035
	172.109	-0.0351		172.125	-0.05646
	172.203	-0.03052		172.25	-0.05188
	172.312	-0.04425		172.312	-0.04578
	172.406	-0.06104		172.438	-0.02594
	172.5	-0.03815		172.5	-0.0351
	172.609	-0.04272		172.625	-0.04272
	172.703	-0.05188		172.75	-0.02747
	172.812	-0.05493		172.812	-0.03204
	172.906	-0.06866		172.938	-0.03052
	173	-0.07324		173	-0.05493
	173.109	-0.08545		173.125	-0.07019
	173.203	-0.06256		173.25	-0.06714
	173.312	-0.05646		173.312	-0.06866
	173.406	-0.08392		173.438	-0.05798
	173.5	-0.08392		173.5	-0.05493
	173.609	-0.07629		173.625	-0.03357
	173.703	-0.09613		173.75	-0.02747
	173.812	-0.10223		173.812	-0.02136
	173.906	-0.08392		173.938	-0.0412
	174	-0.09308		174	-0.04272
	174.109	-0.10376		174.125	-0.06104
	174.203	-0.10223		174.25	-0.06561
	174.312	-0.09155		174.312	-0.05798
	174.406	-0.0946		174.438	-0.05951
	174.5	-0.09003		174.5	-0.06714
	174.609	-0.10681		174.625	-0.05646
	174.703	-0.11139		174.75	-0.06256
	174.812	-0.11139		174.812	-0.05493
	174.906	-0.11902		174.938	-0.05798
	175	-0.13123		175	-0.0412
	175.109	-0.12665		175.125	-0.02899
	175.203	-0.11749		175.25	-0.03052
	175.312	-0.11749		175.312	-0.03052
	175.406	-0.10681		175.438	-0.04425
	175.5	-0.09155		175.5	-0.03815
	175.609	-0.0885		175.625	-0.03662
	175.703	-0.06714		175.75	-0.04272
	175.812	-0.06409		175.812	-0.0351
	175.906	-0.05646		175.938	-0.03662
	176	-0.06866		176	-0.03815
	176.109	-0.05188		176.125	-0.01678
	176.203	-0.05798		176.25	-0.01984
	176.312	-0.04425		176.312	-0.03662
	176.406	-0.04272		176.438	-0.02289
	176.5	-0.04578		176.5	-0.00763
	176.609	-0.03967		176.625	-0.01221
	176.703	-0.0473		176.75	-0.00305
	176.812	-0.04578		176.812	-0.01068
	176.906	-0.03662		176.938	-0.02441
	177	-0.02136		177	-0.01221
	177.109	-0.00916		177.125	0.01068
	177.203	-0.01068		177.25	0.00916
	177.312	-0.01068		177.312	-0.00458
	177.406	-0.00458		177.438	-0.00916
	177.5	-0.00305		177.5	-0.00305
	177.609	0.01678		177.625	0
	177.703	0.02441		177.75	-0.01678
	177.812	0.0061		177.812	0.01373
	177.906	0.01678		177.938	0.01221
	178	0.02441		178	-0.01526
	178.109	0.01678		178.125	-0.03967
	178.203	0.02594		178.25	-0.04272
	178.312	-0.00305		178.312	-0.06561
	178.406	0.00153		178.438	-0.07324
	178.5	-0.01373		178.5	-0.06714
	178.609	-0.01221		178.625	-0.07324
	178.703	0		178.75	-0.07172
	178.812	0.00458		178.812	-0.05646
	178.906	-0.0061		178.938	-0.07935
	179	-0.02289		179	-0.09918
	179.109	-0.04272		179.125	-0.10681
	179.203	-0.05035		179.25	-0.12054
	179.312	-0.03967		179.312	-0.11902
	179.406	-0.03662		179.438	-0.09918
	179.5	-0.0473		179.5	-0.09308
	179.609	-0.0412		179.625	-0.08392
	179.703	-0.01984		179.75	-0.08392
	179.812	-0.0061		179.812	-0.09613
	179.906	0		179.938	-0.09918
	180	-0.01831		180	-0.11292
	180.109	-0.0351		180.125	-0.09918
	180.203	-0.03357		180.25	-0.08545
	180.312	-0.03357		180.312	-0.07629
	180.406	-0.04578		180.438	-0.09918
	180.5	-0.05035		180.5	-0.08392
	180.609	-0.05035		180.625	-0.08698
	180.703	-0.07019		180.75	-0.07477
	180.812	-0.08087		180.812	-0.07477
	180.906	-0.0824		180.938	-0.07629
	181	-0.06714		181	-0.08087
	181.109	-0.05341		181.125	-0.07782
	181.203	-0.05341		181.25	-0.0885
	181.312	-0.06104		181.312	-0.09155
	181.406	-0.07172		181.438	-0.09766
	181.5	-0.06256		181.5	-0.0885
	181.609	-0.07019		181.625	-0.08087
	181.703	-0.06409		181.75	-0.07172
	181.812	-0.07324		181.812	-0.06104
	181.906	-0.0885		181.938	-0.07172
	182	-0.0885		182	-0.07172
	182.109	-0.07935		182.125	-0.06256
	182.203	-0.07324		182.25	-0.05951
	182.312	-0.07324		182.312	-0.06104
	182.406	-0.06409		182.438	-0.06256
	182.5	-0.05188		182.5	-0.06256
	182.609	-0.05188		182.625	-0.05951
	182.703	-0.0412		182.75	-0.06714
	182.812	-0.03815		182.812	-0.06256
	182.906	-0.04883		182.938	-0.06104
	183	-0.04425		183	-0.06409
	183.109	-0.06256		183.125	-0.0473
	183.203	-0.05493		183.25	-0.04883
	183.312	-0.03815		183.312	-0.04272
	183.406	-0.02899		183.438	-0.0351
	183.5	-0.02136		183.5	-0.02441
	183.609	-0.02289		183.625	-0.0351
	183.703	-0.03357		183.75	-0.03967
	183.812	-0.02594		183.812	-0.06409
	183.906	-0.0473		183.938	-0.07172
	184	-0.02136		184	-0.06714
	184.109	0.0061		184.125	-0.05035
	184.203	0.01678		184.25	-0.06256
	184.312	0.02747		184.312	-0.07172
	184.406	0.02441		184.438	-0.06714
	184.5	0.01373		184.5	-0.07019
	184.609	0.00763		184.625	-0.06409
	184.703	0.0061		184.75	-0.06104
	184.812	-0.01831		184.812	-0.05188
	184.906	-0.02441		184.938	-0.06866
	185	-0.03204		185	-0.07935
	185.109	0.00153		185.125	-0.07935
	185.203	-0.00153		185.25	-0.06866
	185.312	-0.01831		185.312	-0.07782
	185.406	-0.03052		185.438	-0.08392
	185.5	-0.03052		185.5	-0.09003
	185.609	-0.03204		185.625	-0.08087
	185.703	-0.05646		185.75	-0.05798
	185.812	-0.05188		185.812	-0.06561
	185.906	-0.05493		185.938	-0.06866
	186	-0.04883		186	-0.10223
	186.109	-0.05188		186.125	-0.0824
	186.203	-0.05951		186.25	-0.0885
	186.312	-0.04578		186.312	-0.08545
	186.406	-0.06714		186.438	-0.07172
	186.5	-0.07172		186.5	-0.09003
	186.609	-0.07324		186.625	-0.09613
	186.703	-0.07324		186.75	-0.10071
	186.812	-0.07935		186.812	-0.10223
	186.906	-0.07324		186.938	-0.11902
	187	-0.07782		187	-0.10529
	187.109	-0.09155		187.125	-0.11597
	187.203	-0.09155		187.25	-0.11292
	187.312	-0.09155		187.312	-0.10529
	187.406	-0.10223		187.438	-0.10071
	187.5	-0.10071		187.5	-0.10681
	187.609	-0.09918		187.625	-0.09918
	187.703	-0.09308		187.75	-0.10681
	187.812	-0.08392		187.812	-0.08392
	187.906	-0.0885		187.938	-0.07019
	188	-0.09155		188	-0.06866
	188.109	-0.10223		188.125	-0.06561
	188.203	-0.09155		188.25	-0.05951
	188.312	-0.07324		188.312	-0.05035
	188.406	-0.07172		188.438	-0.05951
	188.5	-0.07782		188.5	-0.06256
	188.609	-0.0824		188.625	-0.0412
	188.703	-0.06866		188.75	-0.03204
	188.812	-0.06866		188.812	-0.00458
	188.906	-0.05341		188.938	0.00305
	189	-0.06256		189	0
	189.109	-0.0824		189.125	-0.02441
	189.203	-0.0946		189.25	-0.02594
	189.312	-0.06561		189.312	-0.01373
	189.406	-0.06256		189.438	-0.01984
	189.5	-0.06104		189.5	-0.00763
	189.609	-0.05951		189.625	-0.00916
	189.703	-0.05646		189.75	-0.01526
	189.812	-0.05493		189.812	-0.01678
	189.906	-0.07019		189.938	-0.01526
	190	-0.05341		190	-0.02899
	190.109	-0.05798		190.125	-0.04425
	190.203	-0.06866		190.25	-0.01831
	190.312	-0.06714		190.312	-0.01984
	190.406	-0.06104		190.438	-0.02747
	190.5	-0.04272		190.5	-0.02441
	190.609	-0.0473		190.625	-0.01526
	190.703	-0.04578		190.75	-0.03052
	190.812	-0.0473		190.812	-0.01526
	190.906	-0.03967		190.938	-0.03357
	191	-0.04578		191	-0.03815
	191.109	-0.05951		191.125	-0.04272
	191.203	-0.05798		191.25	-0.02747
	191.312	-0.06104		191.312	-0.03052
	191.406	-0.04578		191.438	-0.02594
	191.5	-0.05341		191.5	-0.03815
	191.609	-0.07629		191.625	-0.03052
	191.703	-0.07629		191.75	-0.05798
	191.812	-0.06409		191.812	-0.06714
	191.906	-0.05188		191.938	-0.05493
	192	-0.02899		192	-0.05798
	192.109	-0.03815		192.125	-0.06409
	192.203	-0.0412		192.25	-0.06714
	192.312	-0.05188		192.312	-0.07172
	192.406	-0.04272		192.438	-0.05646
	192.5	-0.0412		192.5	-0.04883
	192.609	-0.05035		192.625	-0.04883
	192.703	-0.04425		192.75	-0.05646
	192.812	-0.0412		192.812	-0.03967
	192.906	-0.04883		192.938	-0.04425
	193	-0.05035		193	-0.05341
	193.109	-0.0473		193.125	-0.06561
	193.203	-0.06104		193.25	-0.06256
	193.312	-0.06561		193.312	-0.05035
	193.406	-0.05951		193.438	-0.05798
	193.5	-0.05798		193.5	-0.06256
	193.609	-0.07477		193.625	-0.07782
	193.703	-0.0824		193.75	-0.07477
	193.812	-0.06866		193.812	-0.06866
	193.906	-0.07782		193.938	-0.06409
	194	-0.08545		194	-0.05188
	194.109	-0.09155		194.125	-0.06256
	194.203	-0.10071		194.25	-0.05798
	194.312	-0.0885		194.312	-0.08087
	194.406	-0.09613		194.438	-0.0885
	194.5	-0.09613		194.5	-0.07629
	194.609	-0.09766		194.625	-0.06104
	194.703	-0.10529		194.75	-0.05798
	194.812	-0.11444		194.812	-0.05188
	194.906	-0.11444		194.938	-0.07782
	195	-0.10071		195	-0.05951
	195.109	-0.0946		195.125	-0.03052
	195.203	-0.09613		195.25	-0.0473
	195.312	-0.12054		195.312	-0.06104
	195.406	-0.11292		195.438	-0.07477
	195.5	-0.11292		195.5	-0.05188
	195.609	-0.10223		195.625	-0.05035
	195.703	-0.09308		195.75	-0.01526
	195.812	-0.07629		195.812	-0.02594
	195.906	-0.05951		195.938	-0.02136
	196	-0.07019		196	-0.01068
	196.109	-0.07019		196.125	-0.00916
	196.203	-0.07477		196.25	-0.00458
	196.312	-0.06561		196.312	-0.0061
	196.406	-0.04425		196.438	0.00305
	196.5	-0.0351		196.5	0.01221
	196.609	-0.04578		196.625	0.02289
	196.703	-0.02441		196.75	0.00916
	196.812	-0.02136		196.812	-0.0061
	196.906	-0.02289		196.938	-0.00916
	197	-0.01068		197	-0.00916
	197.109	0.00305		197.125	-0.0061
	197.203	0.02136		197.25	-0.01678
	197.312	0.00305		197.312	-0.02136
	197.406	-0.02136		197.438	-0.02136
	197.5	-0.02441		197.5	-0.01526
	197.609	-0.0351		197.625	-0.01373
	197.703	-0.03815		197.75	-0.00916
	197.812	-0.03052		197.812	-0.01831
	197.906	-0.01678		197.938	-0.01984
	198	-0.02289		198	-0.03967
	198.109	-0.01678		198.125	-0.03967
	198.203	-0.01526		198.25	-0.05035
	198.312	-0.01221		198.312	-0.06409
	198.406	-0.02899		198.438	-0.06256
	198.5	-0.02594		198.5	-0.05493
	198.609	-0.03052		198.625	-0.05493
	198.703	-0.01221		198.75	-0.06714
	198.812	-0.03662		198.812	-0.06866
	198.906	-0.04272		198.938	-0.06714
	199	-0.03967		199	-0.06866
	199.109	-0.0412		199.125	-0.07172
	199.203	-0.05341		199.25	-0.07935
	199.312	-0.05341		199.312	-0.07782
	199.406	-0.03662		199.438	-0.08545
	199.5	-0.05188		199.5	-0.10376
[truncated: 48,005 more rows]

## Sheet: Figure 6 E iii
mPFC-con-acsf	mPFC-con-2-apb		mPFC-cms-acsf	mPFC-cms-2-apb
5.04	0		0.45	0.3
4.97	0.67		2.77	2.74
6.44	0		1.2	0.9
5.11	0		2.46	1.46
2.24	0		1.14	0.67
3.84	0		0.8	0.35
4.07	0		3.73	2.76
3.68	0		2.46	2.24
3.34	0		1.2	0.3
1.76	0.14		1.35	0.95
2	0.45		1.04	0.9
2.43	0.81		0.98	0.79
4.21	0		1.28	0.43
3.34	0.24		1.69	1.68
3.14	0		1.6	1.3
1.66	0		2.34	1.99
5.4	0		1.9	1.58
2.48	0		1.72	1.54
2.31	1.45		1.63	1.05
1.82	0		1.46	1.28
2.3	0		1.36	1.07
2.09	0.07		1.27	1.06
			1.22	0.63
			1.13	0.95
			0.75	0.76

## Sheet: Figure 6 E iv
con	cmus
100	33.3333
86.5191	1.08303
100	25
100	40.6504
100	41.2281
100	56.25
100	26.0054
100	8.94309
100	75
92.0455	29.6296
77.5	13.4615
66.6667	19.3878
100	66.4062
92.8144	0.591716
100	18.75
100	14.9573
100	16.8421
100	10.4651
37.2294	35.5828
100	12.3288
100	21.3235
96.6507	16.5354
	48.3607
	15.9292
	0
