# Supplementary material for: The cation channel mechanisms of subthreshold inward depolarizing currents in the mice VTA dopaminergic neurons and their roles in the chronic-stress-induced depression-like behavior
Source: eLife. 2024 Dec 6;12:RP88319. doi: 10.7554/eLife.88319 (PMC11623934; doi:10.7554/eLife.88319)
Supplement: Figure 6—source data 6. [file elife-88319-fig6-data6.xlsx]

## Sheet: Figure 6 F i
	Figure 6 F i up						Figure 6 F i bottom
	Con
	acsf			LA
	Time(ms)	Voltage (mv)		Time(ms)	Voltage (mv)		Time(min)	Firing rate(Hz)
	0	-1.70898		0	-1.46484		0.115	2.89855
	0.09766	-2.31934		0.125	-1.58691		0.23	2.75362
	0.19922	-2.13623		0.21875	-1.40381		0.345	3.04348
	0.30078	-2.38037		0.3125	-1.09863		0.46	3.04348
	0.39844	-2.74658		0.40625	-1.0376		0.575	2.89855
	0.5	-2.31934		0.5	-1.15967		0.69	3.04348
	0.59766	-2.92969		0.625	-1.46484		0.805	3.04348
	0.69922	-2.74658		0.71875	-0.97656		0.92	3.04348
	0.80078	-2.86865		0.8125	-1.40381		1.035	3.04348
	0.89844	-2.68555		0.90625	-0.97656		1.15	2.89855
	1	-2.56348		1	-1.40381		1.265	3.04348
	1.09766	-2.68555		1.125	-0.91553		1.38	3.04348
	1.19922	-2.80762		1.21875	-0.97656		1.495	2.89855
	1.30078	-2.74658		1.3125	-0.79346		1.61	2.89855
	1.39844	-2.74658		1.40625	-0.97656		1.725	2.89855
	1.5	-3.05176		1.5	-0.97656		1.84	2.6087
	1.59766	-2.56348		1.625	-0.79346		1.955	2.6087
	1.69922	-2.68555		1.71875	-1.0376		2.07	2.31884
	1.80078	-2.86865		1.8125	-1.09863		2.185	2.17391
	1.89844	-2.92969		1.90625	-1.52588		2.3	2.02899
	2	-2.19727		2	-1.46484		2.415	1.88406
	2.09766	-2.38037		2.125	-1.64795		2.53	1.88406
	2.19922	-2.31934		2.21875	-1.2207		2.645	1.5942
	2.30078	-2.38037		2.3125	-1.28174		2.76	1.73913
	2.39844	-2.44141		2.40625	-1.58691		2.875	1.44928
	2.5	-1.83105		2.5	-1.58691		2.99	1.44928
	2.59766	-2.0752		2.625	-1.89209		3.105	1.44928
	2.69922	-1.83105		2.71875	-1.70898		3.22	1.30435
	2.80078	-1.52588		2.8125	-2.01416		3.335	1.15942
	2.89844	-2.01416		2.90625	-1.58691		3.45	0.86957
	3	-2.13623		3	-1.83105		3.565	0.57971
	3.09766	-1.95312		3.125	-1.77002		3.68	0
	3.19922	-1.89209		3.21875	-2.13623		3.795	0
	3.30078	-1.95312		3.3125	-2.56348		3.91	0
	3.39844	-1.83105		3.40625	-2.56348		4.025	0
	3.5	-2.31934		3.5	-2.86865		4.14	0
	3.59766	-2.0752		3.625	-2.74658		4.255	0
	3.69922	-2.62451		3.71875	-2.80762		4.37	0
	3.80078	-1.89209		3.8125	-2.74658		4.485	0
	3.89844	-1.95312		3.90625	-2.68555		4.6	0
	4	-1.58691		4	-2.19727		4.715	0
	4.09766	-1.70898		4.125	-2.13623		4.83	0
	4.19922	-1.77002		4.21875	-2.13623		4.945	0
	4.30078	-1.83105		4.3125	-2.44141		5.06	0
	4.39844	-1.34277		4.40625	-2.74658		5.175	0
	4.5	-1.52588		4.5	-2.86865		5.29	0
	4.59766	-2.01416		4.625	-2.74658		5.405	0
	4.69922	-1.89209		4.71875	-2.13623		5.52	0
	4.80078	-1.77002		4.8125	-2.50244		5.635	0
	4.89844	-1.77002		4.90625	-2.38037		5.75	0
	5	-1.58691		5	-3.11279		5.865	0
	5.09766	-2.2583		5.125	-2.68555		5.98	0
	5.19922	-1.83105		5.21875	-2.80762		6.095	0
	5.30078	-2.50244		5.3125	-3.05176		6.21	0
	5.39844	-2.56348		5.40625	-2.92969		6.325	0
	5.5	-2.2583		5.5	-2.38037		6.44	0
	5.59766	-1.77002		5.625	-2.2583		6.555	0
	5.69922	-2.19727		5.71875	-2.01416		6.67	0
	5.80078	-1.64795		5.8125	-1.89209		6.785	0
	5.89844	-2.44141		5.90625	-1.58691		6.9	0
	6	-2.56348		6	-1.34277		7.015	0
	6.09766	-2.31934		6.125	-1.83105		7.13	0
	6.19922	-2.62451		6.21875	-1.58691		7.245	0
	6.30078	-2.44141		6.3125	-1.70898		7.36	0
	6.39844	-2.62451		6.40625	-2.38037		7.475	0
	6.5	-2.62451		6.5	-1.70898		7.59	0
	6.59766	-2.50244		6.625	-2.19727		7.705	0
	6.69922	-2.38037		6.71875	-1.77002		7.82	0
	6.80078	-2.92969		6.8125	-1.89209		7.935	0
	6.89844	-2.92969		6.90625	-1.64795		8.05	0
	7	-2.92969		7	-1.89209		8.165	0
	7.09766	-2.86865		7.125	-1.89209		8.28	0
	7.19922	-2.19727		7.21875	-2.19727		8.395	0
	7.30078	-2.50244		7.3125	-2.19727		8.51	0
	7.39844	-2.56348		7.40625	-1.89209		8.625	0
	7.5	-2.74658		7.5	-2.31934		8.74	0
	7.59766	-3.05176		7.625	-1.89209		8.855	0
	7.69922	-3.23486		7.71875	-2.13623		8.97	0
	7.80078	-2.56348		7.8125	-2.13623		9.085	0
	7.89844	-2.86865		7.90625	-2.13623		9.2	0
	8	-2.38037		8	-1.89209		9.315	0
	8.09766	-2.31934		8.125	-2.50244		9.43	0
	8.19922	-2.56348		8.21875	-2.74658		9.545	0
	8.30078	-2.01416		8.3125	-2.13623		9.66	0
	8.39844	-1.89209		8.40625	-2.13623		9.775	0.43478
	8.5	-2.01416		8.5	-1.77002		9.89	1.01449
	8.59766	-1.58691		8.625	-2.19727		10.005	1.01449
	8.69922	-1.83105		8.71875	-1.64795		10.12	1.30435
	8.80078	-1.34277		8.8125	-1.95312		10.235	1.30435
	8.89844	-1.64795		8.90625	-2.0752		10.35	1.5942
	9	-1.64795		9	-1.95312		10.465	1.5942
	9.09766	-1.52588		9.125	-1.89209		10.58	1.73913
	9.19922	-0.91553		9.21875	-1.77002		10.695	1.88406
	9.30078	-1.28174		9.3125	-1.83105		10.81	1.88406
	9.39844	-0.85449		9.40625	-2.01416		10.925	1.88406
	9.5	-1.09863		9.5	-2.31934		11.04	2.02899
	9.59766	-1.28174		9.625	-2.0752		11.155	2.02899
	9.69922	-0.97656		9.71875	-2.56348		11.27	1.88406
	9.80078	-1.09863		9.8125	-2.50244		11.385	1.88406
	9.89844	-1.40381		9.90625	-2.68555		11.5	2.02899
	10	-1.46484		10	-3.11279
	10.0977	-1.58691		10.125	-2.62451
	10.1992	-1.46484		10.2188	-2.92969
	10.3008	-1.58691		10.3125	-2.99072
	10.3984	-1.83105		10.4062	-3.05176
	10.5	-1.64795		10.5	-2.68555
	10.5977	-1.46484		10.625	-3.05176
	10.6992	-1.58691		10.7188	-2.19727
	10.8008	-1.28174		10.8125	-2.68555
	10.8984	-2.0752		10.9062	-2.92969
	11	-2.13623		11	-2.44141
	11.0977	-2.01416		11.125	-3.2959
	11.1992	-1.95312		11.2188	-2.74658
	11.3008	-1.89209		11.3125	-2.86865
	11.3984	-1.09863		11.4062	-2.92969
	11.5	-1.46484		11.5	-2.92969
	11.5977	-1.0376		11.625	-2.62451
	11.6992	-1.46484		11.7188	-2.80762
	11.8008	-1.83105		11.8125	-2.13623
	11.8984	-1.34277		11.9062	-2.44141
	12	-1.46484		12	-2.74658
	12.0977	-1.83105		12.125	-2.2583
	12.1992	-1.95312		12.2188	-2.13623
	12.3008	-2.01416		12.3125	-1.64795
	12.3984	-2.13623		12.4062	-1.40381
	12.5	-1.40381		12.5	-1.28174
	12.5977	-1.64795		12.625	-1.64795
	12.6992	-1.77002		12.7188	-1.70898
	12.8008	-1.09863		12.8125	-1.95312
	12.8984	-2.19727		12.9062	-1.64795
	13	-1.64795		13	-1.52588
	13.0977	-2.62451		13.125	-2.2583
	13.1992	-2.13623		13.2188	-1.58691
	13.3008	-1.77002		13.3125	-1.89209
	13.3984	-1.52588		13.4062	-1.89209
	13.5	-1.58691		13.5	-1.46484
	13.5977	-1.77002		13.625	-1.89209
	13.6992	-2.50244		13.7188	-1.52588
	13.8008	-2.0752		13.8125	-2.01416
	13.8984	-2.38037		13.9062	-1.70898
	14	-2.0752		14	-1.70898
	14.0977	-1.46484		14.125	-1.46484
	14.1992	-1.34277		14.2188	-1.77002
	14.3008	-1.40381		14.3125	-1.28174
	14.3984	-1.52588		14.4062	-1.40381
	14.5	-2.01416		14.5	-1.28174
	14.5977	-1.34277		14.625	-0.67139
	14.6992	-1.89209		14.7188	-1.15967
	14.8008	-1.40381		14.8125	-0.85449
	14.8984	-2.19727		14.9062	-1.09863
	15	-1.40381		15	-0.91553
	15.0977	-2.2583		15.125	-0.97656
	15.1992	-1.40381		15.2188	-0.67139
	15.3008	-1.70898		15.3125	-0.91553
	15.3984	-1.83105		15.4062	-0.67139
	15.5	-2.0752		15.5	-0.91553
	15.5977	-2.2583		15.625	-1.46484
	15.6992	-1.95312		15.7188	-0.91553
	15.8008	-1.89209		15.8125	-1.58691
	15.8984	-1.83105		15.9062	-1.64795
	16	-1.89209		16	-1.64795
	16.0977	-1.70898		16.125	-1.70898
	16.1992	-1.77002		16.2188	-1.83105
	16.3008	-1.64795		16.3125	-1.40381
	16.3984	-1.34277		16.4062	-1.83105
	16.5	-1.58691		16.5	-1.64795
	16.5977	-0.61035		16.625	-1.70898
	16.6992	-1.15967		16.7188	-2.01416
	16.8008	-0.79346		16.8125	-1.28174
	16.8984	-1.2207		16.9062	-1.83105
	17	-0.73242		17	-1.52588
	17.0977	-0.67139		17.125	-1.64795
	17.1992	-0.67139		17.2188	-1.09863
	17.3008	-0.91553		17.3125	-1.28174
	17.3984	-1.15967		17.4062	-1.09863
	17.5	-1.15967		17.5	-1.0376
	17.5977	-1.52588		17.625	-1.2207
	17.6992	-1.0376		17.7188	-1.0376
	17.8008	-1.2207		17.8125	-1.46484
	17.8984	-1.34277		17.9062	-1.2207
	18	-1.34277		18	-1.58691
	18.0977	-0.91553		18.125	-1.40381
	18.1992	-0.91553		18.2188	-1.40381
	18.3008	-1.34277		18.3125	-1.77002
	18.3984	-1.09863		18.4062	-1.64795
	18.5	-1.64795		18.5	-1.89209
	18.5977	-0.91553		18.625	-1.89209
	18.6992	-1.46484		18.7188	-2.2583
	18.8008	-1.40381		18.8125	-1.58691
	18.8984	-1.89209		18.9062	-2.0752
	19	-1.64795		19	-1.52588
	19.0977	-2.2583		19.125	-2.01416
	19.1992	-2.13623		19.2188	-1.64795
	19.3008	-1.95312		19.3125	-1.64795
	19.3984	-2.31934		19.4062	-1.83105
	19.5	-1.83105		19.5	-1.77002
	19.5977	-2.01416		19.625	-1.70898
	19.6992	-1.95312		19.7188	-1.52588
	19.8008	-2.0752		19.8125	-1.52588
	19.8984	-2.19727		19.9062	-1.34277
	20	-2.50244		20	-1.52588
	20.0977	-2.56348		20.125	-1.52588
	20.1992	-2.31934		20.2188	-1.34277
	20.3008	-2.19727		20.3125	-1.52588
	20.3984	-1.58691		20.4062	-1.0376
	20.5	-2.2583		20.5	-1.28174
	20.5977	-1.95312		20.625	-0.91553
	20.6992	-2.2583		20.7188	-1.46484
	20.8008	-2.74658		20.8125	-0.97656
	20.8984	-3.05176		20.9062	-1.28174
	21	-2.99072		21	-0.97656
	21.0977	-2.68555		21.125	-1.2207
	21.1992	-2.68555		21.2188	-1.09863
	21.3008	-2.80762		21.3125	-1.15967
	21.3984	-2.99072		21.4062	-1.46484
	21.5	-2.44141		21.5	-1.40381
	21.5977	-2.62451		21.625	-1.70898
	21.6992	-2.44141		21.7188	-1.15967
	21.8008	-2.38037		21.8125	-1.95312
	21.8984	-2.68555		21.9062	-1.83105
	22	-2.31934		22	-2.13623
	22.0977	-2.62451		22.125	-2.38037
	22.1992	-2.38037		22.2188	-2.50244
	22.3008	-2.0752		22.3125	-2.19727
	22.3984	-2.13623		22.4062	-2.19727
	22.5	-2.01416		22.5	-1.95312
	22.5977	-1.58691		22.625	-1.83105
	22.6992	-2.31934		22.7188	-1.83105
	22.8008	-1.95312		22.8125	-1.83105
	22.8984	-2.31934		22.9062	-2.56348
	23	-2.38037		23	-2.13623
	23.0977	-2.31934		23.125	-2.38037
	23.1992	-2.2583		23.2188	-2.38037
	23.3008	-2.50244		23.3125	-2.01416
	23.3984	-2.50244		23.4062	-2.44141
	23.5	-2.50244		23.5	-2.50244
	23.5977	-2.74658		23.625	-2.31934
	23.6992	-1.83105		23.7188	-2.13623
	23.8008	-2.19727		23.8125	-2.31934
	23.8984	-2.31934		23.9062	-2.13623
	24	-1.64795		24	-2.56348
	24.0977	-2.2583		24.125	-2.44141
	24.1992	-1.64795		24.2188	-2.13623
	24.3008	-2.0752		24.3125	-2.50244
	24.3984	-2.01416		24.4062	-2.13623
	24.5	-1.70898		24.5	-2.13623
	24.5977	-1.52588		24.625	-2.0752
	24.6992	-2.38037		24.7188	-1.64795
	24.8008	-1.70898		24.8125	-1.58691
	24.8984	-2.44141		24.9062	-1.58691
	25	-2.01416		25	-1.46484
	25.0977	-1.52588		25.125	-2.0752
	25.1992	-1.77002		25.2188	-2.19727
	25.3008	-1.70898		25.3125	-2.0752
	25.3984	-1.70898		25.4062	-2.44141
	25.5	-2.0752		25.5	-1.83105
	25.5977	-1.89209		25.625	-1.83105
	25.6992	-2.0752		25.7188	-1.28174
	25.8008	-1.95312		25.8125	-1.52588
	25.8984	-2.38037		25.9062	-1.52588
	26	-1.64795		26	-1.46484
	26.0977	-2.50244		26.125	-1.64795
	26.1992	-2.01416		26.2188	-1.52588
	26.3008	-2.68555		26.3125	-1.89209
	26.3984	-2.50244		26.4062	-1.77002
	26.5	-2.68555		26.5	-2.19727
	26.5977	-2.80762		26.625	-1.46484
	26.6992	-2.86865		26.7188	-1.52588
	26.8008	-2.68555		26.8125	-1.95312
	26.8984	-2.99072		26.9062	-1.89209
	27	-2.86865		27	-2.01416
	27.0977	-2.86865		27.125	-1.89209
	27.1992	-2.92969		27.2188	-2.19727
	27.3008	-2.31934		27.3125	-2.13623
	27.3984	-2.80762		27.4062	-2.2583
	27.5	-2.56348		27.5	-1.70898
	27.5977	-2.44141		27.625	-2.68555
	27.6992	-2.62451		27.7188	-2.19727
	27.8008	-2.38037		27.8125	-1.89209
	27.8984	-2.80762		27.9062	-2.38037
	28	-2.50244		28	-2.0752
	28.0977	-2.62451		28.125	-2.50244
	28.1992	-2.80762		28.2188	-2.38037
	28.3008	-2.86865		28.3125	-2.19727
	28.3984	-2.50244		28.4062	-2.19727
	28.5	-2.68555		28.5	-1.83105
	28.5977	-2.92969		28.625	-1.70898
	28.6992	-2.74658		28.7188	-1.89209
	28.8008	-2.50244		28.8125	-2.2583
	28.8984	-2.50244		28.9062	-1.58691
	29	-2.13623		29	-2.44141
	29.0977	-2.50244		29.125	-2.2583
	29.1992	-2.13623		29.2188	-2.31934
	29.3008	-1.77002		29.3125	-2.38037
	29.3984	-2.13623		29.4062	-2.56348
	29.5	-1.64795		29.5	-2.68555
	29.5977	-1.58691		29.625	-2.74658
	29.6992	-2.19727		29.7188	-2.62451
	29.8008	-1.70898		29.8125	-2.74658
	29.8984	-1.77002		29.9062	-3.11279
	30	-1.0376		30	-2.31934
	30.0977	-1.77002		30.125	-2.99072
	30.1992	-2.01416		30.2188	-2.50244
	30.3008	-2.31934		30.3125	-2.56348
	30.3984	-1.83105		30.4062	-2.56348
	30.5	-2.44141		30.5	-2.50244
	30.5977	-2.13623		30.625	-2.74658
	30.6992	-2.19727		30.7188	-2.56348
	30.8008	-2.19727		30.8125	-2.50244
	30.8984	-1.77002		30.9062	-2.68555
	31	-2.0752		31	-2.99072
	31.0977	-1.95312		31.125	-2.68555
	31.1992	-2.50244		31.2188	-2.74658
	31.3008	-2.44141		31.3125	-2.2583
	31.3984	-2.50244		31.4062	-2.31934
	31.5	-2.13623		31.5	-2.13623
	31.5977	-1.89209		31.625	-2.01416
	31.6992	-2.31934		31.7188	-1.89209
	31.8008	-1.83105		31.8125	-1.83105
	31.8984	-2.56348		31.9062	-2.13623
	32	-2.01416		32	-2.0752
	32.0977	-2.01416		32.125	-2.68555
	32.1992	-1.52588		32.2188	-2.0752
	32.3008	-1.70898		32.3125	-2.2583
	32.3984	-2.31934		32.4062	-2.2583
	32.5	-2.01416		32.5	-1.52588
	32.5977	-2.31934		32.625	-1.77002
	32.6992	-2.2583		32.7188	-1.34277
	32.8008	-2.13623		32.8125	-1.58691
	32.8984	-2.13623		32.9062	-1.58691
	33	-2.01416		33	-1.58691
	33.0977	-1.70898		33.125	-1.28174
	33.1992	-1.58691		33.2188	-1.28174
	33.3008	-2.0752		33.3125	-1.0376
	33.3984	-2.01416		33.4062	-1.15967
	33.5	-1.89209		33.5	-1.34277
	33.5977	-1.77002		33.625	-0.97656
	33.6992	-2.01416		33.7188	-1.58691
	33.8008	-1.95312		33.8125	-1.46484
	33.8984	-2.0752		33.9062	-1.64795
	34	-1.2207		34	-1.77002
	34.0977	-1.70898		34.125	-1.58691
	34.1992	-2.01416		34.2188	-1.40381
	34.3008	-2.01416		34.3125	-1.40381
	34.3984	-2.01416		34.4062	-1.58691
	34.5	-2.19727		34.5	-1.70898
	34.5977	-2.01416		34.625	-2.19727
	34.6992	-1.58691		34.7188	-1.52588
	34.8008	-1.77002		34.8125	-1.83105
	34.8984	-1.77002		34.9062	-1.77002
	35	-1.46484		35	-1.77002
	35.0977	-1.77002		35.125	-1.64795
	35.1992	-1.77002		35.2188	-1.28174
	35.3008	-2.0752		35.3125	-1.52588
	35.3984	-1.58691		35.4062	-1.89209
	35.5	-1.89209		35.5	-1.89209
	35.5977	-1.70898		35.625	-1.40381
	35.6992	-1.95312		35.7188	-1.52588
	35.8008	-1.52588		35.8125	-1.52588
	35.8984	-2.0752		35.9062	-1.70898
	36	-1.77002		36	-1.46484
	36.0977	-1.77002		36.125	-1.46484
	36.1992	-2.19727		36.2188	-1.34277
	36.3008	-2.19727		36.3125	-1.40381
	36.3984	-2.19727		36.4062	-1.70898
	36.5	-1.70898		36.5	-1.58691
	36.5977	-1.89209		36.625	-1.70898
	36.6992	-1.89209		36.7188	-1.46484
	36.8008	-1.15967		36.8125	-1.64795
	36.8984	-0.79346		36.9062	-1.0376
	37	-0.73242		37	-0.91553
	37.0977	-1.15967		37.125	-0.79346
	37.1992	-0.79346		37.2188	-0.97656
	37.3008	-1.52588		37.3125	-0.85449
	37.3984	-0.97656		37.4062	-0.91553
	37.5	-1.0376		37.5	-1.09863
	37.5977	-0.91553		37.625	-0.97656
	37.6992	-1.0376		37.7188	-1.34277
	37.8008	-0.73242		37.8125	-1.34277
	37.8984	-1.09863		37.9062	-1.58691
	38	-0.97656		38	-1.2207
	38.0977	-1.09863		38.125	-1.34277
	38.1992	-1.28174		38.2188	-1.70898
	38.3008	-1.15967		38.3125	-1.52588
	38.3984	-1.64795		38.4062	-1.89209
	38.5	-1.46484		38.5	-1.95312
	38.5977	-1.70898		38.625	-2.01416
	38.6992	-1.89209		38.7188	-1.52588
	38.8008	-1.46484		38.8125	-1.77002
	38.8984	-2.19727		38.9062	-1.58691
	39	-1.52588		39	-1.77002
	39.0977	-1.70898		39.125	-1.64795
	39.1992	-1.52588		39.2188	-1.58691
	39.3008	-1.95312		39.3125	-1.77002
	39.3984	-1.46484		39.4062	-1.40381
	39.5	-1.83105		39.5	-1.2207
	39.5977	-1.46484		39.625	-1.09863
	39.6992	-1.64795		39.7188	-1.28174
	39.8008	-1.95312		39.8125	-0.54932
	39.8984	-1.95312		39.9062	-0.73242
	40	-2.44141		40	-0.85449
	40.0977	-2.50244		40.125	-0.61035
	40.1992	-2.19727		40.2188	-0.79346
	40.3008	-2.31934		40.3125	-0.54932
	40.3984	-2.86865		40.4062	-0.73242
	40.5	-2.68555		40.5	-0.79346
	40.5977	-2.80762		40.625	-1.09863
	40.6992	-2.68555		40.7188	-0.61035
	40.8008	-2.38037		40.8125	-1.28174
	40.8984	-2.99072		40.9062	-1.34277
	41	-2.38037		41	-1.09863
	41.0977	-2.74658		41.125	-1.52588
	41.1992	-2.50244		41.2188	-0.91553
	41.3008	-2.38037		41.3125	-0.85449
	41.3984	-2.80762		41.4062	-0.97656
	41.5	-3.23486		41.5	-0.85449
	41.5977	-2.31934		41.625	-0.79346
	41.6992	-2.56348		41.7188	-1.0376
	41.8008	-2.44141		41.8125	-0.91553
	41.8984	-1.70898		41.9062	-1.52588
	42	-1.83105		42	-1.89209
	42.0977	-1.52588		42.125	-1.34277
	42.1992	-2.01416		42.2188	-1.95312
	42.3008	-2.38037		42.3125	-1.52588
	42.3984	-2.31934		42.4062	-2.31934
	42.5	-1.89209		42.5	-2.0752
	42.5977	-1.95312		42.625	-2.0752
	42.6992	-1.46484		42.7188	-2.13623
	42.8008	-1.52588		42.8125	-2.19727
	42.8984	-2.0752		42.9062	-2.19727
	43	-1.15967		43	-1.89209
	43.0977	-1.83105		43.125	-2.50244
	43.1992	-1.58691		43.2188	-2.01416
	43.3008	-2.38037		43.3125	-2.56348
	43.3984	-2.19727		43.4062	-2.44141
	43.5	-2.01416		43.5	-2.56348
	43.5977	-2.19727		43.625	-2.74658
	43.6992	-2.38037		43.7188	-2.2583
	43.8008	-1.89209		43.8125	-2.44141
	43.8984	-1.95312		43.9062	-1.95312
	44	-1.89209		44	-2.2583
	44.0977	-1.52588		44.125	-2.56348
	44.1992	-2.19727		44.2188	-2.80762
	44.3008	-1.64795		44.3125	-2.2583
	44.3984	-1.95312		44.4062	-2.68555
	44.5	-2.19727		44.5	-2.13623
	44.5977	-1.89209		44.625	-1.95312
	44.6992	-2.50244		44.7188	-2.19727
	44.8008	-2.50244		44.8125	-1.70898
	44.8984	-2.31934		44.9062	-2.44141
	45	-1.83105		45	-2.38037
	45.0977	-2.01416		45.125	-2.50244
	45.1992	-1.64795		45.2188	-2.38037
	45.3008	-1.95312		45.3125	-2.31934
	45.3984	-2.2583		45.4062	-2.01416
	45.5	-2.0752		45.5	-2.31934
	45.5977	-2.50244		45.625	-2.31934
	45.6992	-1.95312		45.7188	-1.70898
	45.8008	-2.0752		45.8125	-2.2583
	45.8984	-2.19727		45.9062	-1.64795
	46	-1.77002		46	-2.19727
	46.0977	-2.2583		46.125	-2.31934
	46.1992	-2.56348		46.2188	-1.77002
	46.3008	-2.13623		46.3125	-1.77002
	46.3984	-2.38037		46.4062	-2.19727
	46.5	-2.38037		46.5	-1.83105
	46.5977	-2.44141		46.625	-2.0752
	46.6992	-2.74658		46.7188	-2.13623
	46.8008	-2.31934		46.8125	-1.58691
	46.8984	-3.41797		46.9062	-2.0752
	47	-3.2959		47	-2.01416
	47.0977	-3.479		47.125	-2.01416
	47.1992	-3.2959		47.2188	-2.0752
	47.3008	-3.05176		47.3125	-1.77002
	47.3984	-2.31934		47.4062	-1.89209
	47.5	-2.0752		47.5	-2.19727
	47.5977	-2.44141		47.625	-2.31934
	47.6992	-2.2583		47.7188	-2.2583
	47.8008	-2.19727		47.8125	-2.62451
	47.8984	-2.0752		47.9062	-2.01416
	48	-2.0752		48	-2.56348
	48.0977	-2.0752		48.125	-2.31934
	48.1992	-1.95312		48.2188	-2.2583
	48.3008	-1.89209		48.3125	-2.19727
	48.3984	-1.89209		48.4062	-1.89209
	48.5	-2.38037		48.5	-2.13623
	48.5977	-2.38037		48.625	-2.74658
	48.6992	-2.80762		48.7188	-2.62451
	48.8008	-2.19727		48.8125	-2.19727
	48.8984	-2.31934		48.9062	-2.68555
	49	-1.52588		49	-1.95312
	49.0977	-1.89209		49.125	-2.38037
	49.1992	-1.77002		49.2188	-1.70898
	49.3008	-1.64795		49.3125	-1.64795
	49.3984	-1.70898		49.4062	-2.2583
	49.5	-1.58691		49.5	-2.31934
	49.5977	-1.46484		49.625	-2.92969
	49.6992	-1.0376		49.7188	-2.56348
	49.8008	-1.40381		49.8125	-2.80762
	49.8984	-1.09863		49.9062	-2.86865
	50	-0.97656		50	-3.11279
	50.0977	-1.0376		50.125	-2.62451
	50.1992	-1.34277		50.2188	-2.86865
	50.3008	-1.52588		50.3125	-3.23486
	50.3984	-1.0376		50.4062	-2.86865
	50.5	-1.2207		50.5	-3.2959
	50.5977	-0.97656		50.625	-2.68555
	50.6992	-1.58691		50.7188	-2.86865
	50.8008	-1.15967		50.8125	-2.62451
	50.8984	-1.40381		50.9062	-2.86865
	51	-0.85449		51	-2.62451
	51.0977	-1.0376		51.125	-3.2959
	51.1992	-1.2207		51.2188	-2.80762
	51.3008	-1.2207		51.3125	-2.74658
	51.3984	-1.46484		51.4062	-2.99072
	51.5	-0.97656		51.5	-2.38037
	51.5977	-1.15967		51.625	-2.56348
	51.6992	-0.73242		51.7188	-2.2583
	51.8008	-0.36621		51.8125	-2.13623
	51.8984	-0.24414		51.9062	-2.0752
	52	-0.36621		52	-2.01416
	52.0977	-0.91553		52.125	-1.89209
	52.1992	-0.61035		52.2188	-1.83105
	52.3008	-1.15967		52.3125	-1.70898
	52.3984	-1.2207		52.4062	-1.64795
	52.5	-0.91553		52.5	-1.83105
	52.5977	-0.36621		52.625	-1.58691
	52.6992	-0.06104		52.7188	-1.46484
	52.8008	1.09863		52.8125	-1.28174
	52.8984	2.2583		52.9062	-1.0376
	53	8.05664		53	-0.91553
	53.0977	17.8833		53.125	-0.67139
	53.1992	26.4893		53.2188	-1.15967
	53.3008	32.1655		53.3125	-0.97656
	53.3984	36.0107		53.4062	-1.09863
	53.5	41.1987		53.5	-0.85449
	53.5977	49.2554		53.625	-1.0376
	53.6992	59.7534		53.7188	-0.79346
	53.8008	67.8101		53.8125	-0.79346
	53.8984	69.397		53.9062	-0.67139
	54	64.5752		54	-0.79346
	54.0977	54.0771		54.125	-1.0376
	54.1992	42.2363		54.2188	-0.79346
	54.3008	28.0151		54.3125	-1.09863
	54.3984	15.625		54.4062	-1.40381
	54.5	3.78418		54.5	-1.70898
	54.5977	-6.53076		54.625	-1.64795
	54.6992	-15.9302		54.7188	-1.46484
	54.8008	-24.7192		54.8125	-0.91553
	54.8984	-33.2031		54.9062	-1.28174
	55	-39.978		55	-1.40381
	55.0977	-45.7764		55.125	-1.83105
	55.1992	-51.2085		55.2188	-1.77002
	55.3008	-54.9316		55.3125	-2.0752
	55.3984	-59.6313		55.4062	-2.19727
	55.5	-62.1338		55.5	-2.13623
	55.5977	-63.9038		55.625	-1.83105
	55.6992	-65.4297		55.7188	-1.09863
	55.8008	-66.1621		55.8125	-1.40381
	55.8984	-65.918		55.9062	-1.2207
	56	-65.3686		56	-1.09863
	56.0977	-63.5986		56.125	-1.09863
	56.1992	-60.3027		56.2188	-0.97656
	56.3008	-57.1899		56.3125	-1.09863
	56.3984	-53.6499		56.4062	-0.85449
	56.5	-50.1099		56.5	-1.28174
	56.5977	-45.9595		56.625	-0.91553
	56.6992	-41.626		56.7188	-1.0376
	56.8008	-37.7808		56.8125	-0.85449
	56.8984	-34.1797		56.9062	-0.67139
	57	-30.5786		57	-1.0376
	57.0977	-28.0151		57.125	-0.54932
	57.1992	-25.6958		57.2188	-1.0376
	57.3008	-23.0713		57.3125	-1.28174
	57.3984	-21.2402		57.4062	-1.40381
	57.5	-18.4936		57.5	-1.09863
	57.5977	-17.2119		57.625	-1.40381
	57.6992	-15.4419		57.7188	-1.0376
	57.8008	-13.6108		57.8125	-0.91553
	57.8984	-12.6953		57.9062	-1.46484
	58	-11.2915		58	-1.15967
	58.0977	-10.1318		58.125	-1.64795
	58.1992	-8.91113		58.2188	-1.09863
	58.3008	-8.11767		58.3125	-1.40381
	58.3984	-6.83594		58.4062	-1.77002
	58.5	-6.65283		58.5	-1.77002
	58.5977	-5.7373		58.625	-1.34277
	58.6992	-5.24902		58.7188	-1.83105
	58.8008	-4.63867		58.8125	-1.83105
	58.8984	-3.72314		58.9062	-1.77002
	59	-3.479		59	-2.13623
	59.0977	-3.23486		59.125	-1.52588
	59.1992	-2.2583		59.2188	-1.89209
	59.3008	-2.38037		59.3125	-1.89209
	59.3984	-2.74658		59.4062	-1.95312
	59.5	-1.77002		59.5	-1.28174
	59.5977	-1.64795		59.625	-1.40381
	59.6992	-1.77002		59.7188	-1.2207
	59.8008	-0.85449		59.8125	-1.34277
	59.8984	-1.64795		59.9062	-1.46484
	60	-0.61035		60	-1.28174
	60.0977	-0.97656		60.125	-1.89209
	60.1992	-0.36621		60.2188	-1.52588
	60.3008	-0.67139		60.3125	-1.46484
	60.3984	-0.85449		60.4062	-1.28174
	60.5	-0.48828		60.5	-0.97656
	60.5977	-0.30518		60.625	-1.0376
	60.6992	-0.36621		60.7188	-0.67139
	60.8008	-0.48828		60.8125	-1.09863
	60.8984	-0.42725		60.9062	-1.09863
	61	-0.61035		61	-1.34277
	61.0977	-0.48828		61.125	-0.97656
	61.1992	-0.18311		61.2188	-1.58691
	61.3008	-0.24414		61.3125	-0.97656
	61.3984	0.36621		61.4062	-1.15967
	61.5	0.18311		61.5	-1.28174
	61.5977	0.06104		61.625	-1.2207
	61.6992	0.12207		61.7188	-1.52588
	61.8008	0.12207		61.8125	-1.0376
	61.8984	0.36621		61.9062	-1.28174
	62	1.28174		62	-1.09863
	62.0977	1.09863		62.125	-1.46484
	62.1992	1.28174		62.2188	-0.97656
	62.3008	0.85449		62.3125	-1.89209
	62.3984	0.73242		62.4062	-1.70898
	62.5	1.34277		62.5	-1.52588
	62.5977	1.09863		62.625	-2.0752
	62.6992	1.40381		62.7188	-1.58691
	62.8008	1.46484		62.8125	-2.0752
	62.8984	1.40381		62.9062	-1.58691
	63	1.34277		63	-1.28174
	63.0977	1.58691		63.125	-1.52588
	63.1992	1.46484		63.2188	-1.95312
	63.3008	1.09863		63.3125	-1.09863
	63.3984	0.61035		63.4062	-1.70898
	63.5	0.54932		63.5	-1.64795
	63.5977	0.36621		63.625	-1.58691
	63.6992	-0.06104		63.7188	-2.19727
	63.8008	0.24414		63.8125	-1.70898
	63.8984	0.18311		63.9062	-1.95312
	64	0.54932		64	-1.83105
	64.0977	0.36621		64.125	-2.19727
	64.1992	1.0376		64.2188	-1.89209
	64.3008	0.67139		64.3125	-2.38037
	64.3984	0.42725		64.4062	-2.56348
	64.5	0.30518		64.5	-2.31934
	64.5977	0.42725		64.625	-2.80762
	64.6992	0.67139		64.7188	-1.89209
	64.8008	0.61035		64.8125	-2.62451
	64.8984	0.30518		64.9062	-2.2583
	65	0.54932		65	-2.74658
	65.0977	1.2207		65.125	-2.44141
	65.1992	0.91553		65.2188	-2.2583
	65.3008	0.97656		65.3125	-2.19727
	65.3984	0.97656		65.4062	-2.56348
	65.5	1.0376		65.5	-2.68555
	65.5977	0.91553		65.625	-2.74658
	65.6992	0.36621		65.7188	-2.99072
	65.8008	0.54932		65.8125	-2.31934
	65.8984	0.48828		65.9062	-2.99072
	66	1.0376		66	-2.31934
	66.0977	0.48828		66.125	-2.50244
	66.1992	0.36621		66.2188	-2.74658
	66.3008	0.61035		66.3125	-2.44141
	66.3984	0.24414		66.4062	-2.80762
	66.5	0.36621		66.5	-2.50244
	66.5977	-0.18311		66.625	-2.80762
	66.6992	-0.12207		66.7188	-2.44141
	66.8008	-0.12207		66.8125	-2.74658
	66.8984	0.06104		66.9062	-2.38037
	67	0		67	-2.56348
	67.0977	-0.42725		67.125	-2.2583
	67.1992	-0.06104		67.2188	-1.89209
	67.3008	0		67.3125	-2.31934
	67.3984	0.18311		67.4062	-2.0752
	67.5	-0.06104		67.5	-2.2583
	67.5977	0.18311		67.625	-2.2583
	67.6992	0.12207		67.7188	-2.0752
	67.8008	0.12207		67.8125	-2.31934
	67.8984	-0.24414		67.9062	-2.31934
	68	-0.18311		68	-1.77002
	68.0977	-0.30518		68.125	-2.2583
	68.1992	-0.48828		68.2188	-2.62451
	68.3008	-0.06104		68.3125	-2.0752
	68.3984	-0.48828		68.4062	-2.56348
	68.5	-0.06104		68.5	-1.89209
	68.5977	-0.48828		68.625	-2.31934
	68.6992	0		68.7188	-1.95312
	68.8008	0.24414		68.8125	-2.0752
	68.8984	0.12207		68.9062	-2.01416
	69	0.97656		69	-2.31934
	69.0977	0.36621		69.125	-1.95312
	69.1992	1.0376		69.2188	-1.58691
	69.3008	0.79346		69.3125	-2.13623
	69.3984	1.09863		69.4062	-2.19727
	69.5	1.34277		69.5	-2.56348
	69.5977	1.64795		69.625	-2.68555
	69.6992	1.2207		69.7188	-2.38037
	69.8008	1.15967		69.8125	-2.38037
	69.8984	0.85449		69.9062	-2.50244
	70	0.79346		70	-2.50244
	70.0977	0.97656		70.125	-2.68555
	70.1992	0.97656		70.2188	-3.11279
	70.3008	0.97656		70.3125	-2.80762
	70.3984	0.91553		70.4062	-3.54004
	70.5	1.15967		70.5	-3.35693
	70.5977	0.54932		70.625	-3.54004
	70.6992	0.85449		70.7188	-2.86865
	70.8008	0.36621		70.8125	-3.05176
	70.8984	0.30518		70.9062	-3.23486
	71	0.91553		71	-2.99072
	71.0977	-0.06104		71.125	-3.35693
	71.1992	0.48828		71.2188	-3.2959
	71.3008	0.30518		71.3125	-3.41797
	71.3984	0.12207		71.4062	-2.86865
	71.5	0.30518		71.5	-2.99072
	71.5977	0.24414		71.625	-2.38037
	71.6992	0.12207		71.7188	-2.62451
	71.8008	0.42725		71.8125	-2.50244
	71.8984	0.36621		71.9062	-2.99072
	72	-0.06104		72	-2.62451
	72.0977	0.30518		72.125	-2.74658
	72.1992	0		72.2188	-2.44141
	72.3008	0.42725		72.3125	-2.44141
	72.3984	0.54932		72.4062	-2.2583
	72.5	0.54932		72.5	-1.83105
	72.5977	0.24414		72.625	-1.70898
	72.6992	0.12207		72.7188	-1.83105
	72.8008	0.36621		72.8125	-2.01416
	72.8984	0.42725		72.9062	-1.83105
	73	0.73242		73	-1.89209
	73.0977	0.61035		73.125	-1.64795
	73.1992	0.67139		73.2188	-1.2207
	73.3008	0.48828		73.3125	-1.2207
	73.3984	0.36621		73.4062	-1.0376
	73.5	0.73242		73.5	-0.97656
	73.5977	0.67139		73.625	-0.79346
	73.6992	0.73242		73.7188	-0.85449
	73.8008	0.54932		73.8125	-1.0376
	73.8984	0.18311		73.9062	-0.97656
	74	0.06104		74	-1.09863
	74.0977	0.30518		74.125	-1.28174
	74.1992	0.36621		74.2188	-1.28174
	74.3008	0.85449		74.3125	-1.40381
	74.3984	0.24414		74.4062	-2.0752
	74.5	0.67139		74.5	-1.58691
	74.5977	0.79346		74.625	-1.95312
	74.6992	-0.12207		74.7188	-1.52588
	74.8008	0.12207		74.8125	-1.40381
	74.8984	-0.12207		74.9062	-1.77002
	75	0.06104		75	-1.58691
	75.0977	-0.24414		75.125	-1.83105
	75.1992	-0.48828		75.2188	-1.70898
	75.3008	-0.61035		75.3125	-1.95312
	75.3984	0.42725		75.4062	-1.40381
	75.5	0.24414		75.5	-1.95312
	75.5977	-0.30518		75.625	-1.89209
	75.6992	0		75.7188	-1.70898
	75.8008	-0.36621		75.8125	-2.13623
	75.8984	-0.24414		75.9062	-1.70898
	76	0		76	-2.2583
	76.0977	0.06104		76.125	-1.70898
	76.1992	0.18311		76.2188	-1.70898
	76.3008	0.85449		76.3125	-1.46484
	76.3984	0.48828		76.4062	-1.52588
	76.5	0.85449		76.5	-1.2207
	76.5977	0.79346		76.625	-1.83105
	76.6992	0.06104		76.7188	-1.89209
	76.8008	0.42725		76.8125	-1.70898
	76.8984	0.30518		76.9062	-2.68555
	77	0.54932		77	-1.95312
	77.0977	0.54932		77.125	-2.0752
	77.1992	0.54932		77.2188	-1.77002
	77.3008	0.18311		77.3125	-1.52588
	77.3984	0.24414		77.4062	-1.70898
	77.5	-0.12207		77.5	-1.70898
	77.5977	-0.06104		77.625	-1.83105
	77.6992	0		77.7188	-1.40381
	77.8008	-0.06104		77.8125	-1.77002
	77.8984	0.54932		77.9062	-1.15967
	78	0.06104		78	-1.95312
	78.0977	0.30518		78.125	-1.09863
	78.1992	0.24414		78.2188	-1.34277
	78.3008	0.24414		78.3125	-1.46484
	78.3984	0.06104		78.4062	-1.70898
	78.5	0		78.5	-1.46484
	78.5977	0.18311		78.625	-1.77002
	78.6992	0.30518		78.7188	-1.83105
	78.8008	0.42725		78.8125	-2.13623
	78.8984	-0.36621		78.9062	-2.13623
	79	0.18311		79	-1.83105
	79.0977	-0.30518		79.125	-2.44141
	79.1992	-0.24414		79.2188	-1.83105
	79.3008	0.12207		79.3125	-1.95312
	79.3984	-0.67139		79.4062	-2.13623
	79.5	-0.61035		79.5	-1.2207
	79.5977	-1.15967		79.625	-1.83105
	79.6992	-1.28174		79.7188	-1.46484
	79.8008	-1.34277		79.8125	-1.46484
	79.8984	-1.28174		79.9062	-1.15967
	80	-1.34277		80	-1.58691
	80.0977	-1.34277		80.125	-0.91553
	80.1992	-1.77002		80.2188	-1.58691
	80.3008	-1.58691		80.3125	-1.2207
	80.3984	-1.0376		80.4062	-1.0376
	80.5	-0.79346		80.5	-1.09863
	80.5977	-0.73242		80.625	-0.67139
	80.6992	-0.85449		80.7188	-1.28174
	80.8008	-0.73242		80.8125	-1.0376
	80.8984	-1.0376		80.9062	-1.0376
	81	-0.61035		81	-1.34277
	81.0977	-1.15967		81.125	-1.52588
	81.1992	-0.97656		81.2188	-0.54932
	81.3008	-0.67139		81.3125	-1.09863
	81.3984	-1.40381		81.4062	-1.34277
	81.5	-0.61035		81.5	-0.79346
	81.5977	-0.73242		81.625	-1.34277
	81.6992	-0.42725		81.7188	-0.91553
	81.8008	-0.79346		81.8125	-1.0376
	81.8984	-1.40381		81.9062	-1.28174
	82	-1.52588		82	-0.97656
	82.0977	-1.70898		82.125	-1.2207
	82.1992	-1.46484		82.2188	-1.64795
	82.3008	-1.40381		82.3125	-1.40381
	82.3984	-1.15967		82.4062	-1.77002
	82.5	-1.52588		82.5	-1.95312
	82.5977	-1.0376		82.625	-1.46484
	82.6992	-1.2207		82.7188	-1.64795
	82.8008	-0.85449		82.8125	-1.64795
	82.8984	-1.2207		82.9062	-1.58691
	83	-0.61035		83	-1.52588
	83.0977	-0.85449		83.125	-1.83105
	83.1992	-1.15967		83.2188	-1.89209
	83.3008	-1.09863		83.3125	-1.83105
	83.3984	-1.64795		83.4062	-2.0752
	83.5	-1.40381		83.5	-2.01416
	83.5977	-1.77002		83.625	-2.62451
	83.6992	-1.40381		83.7188	-2.13623
	83.8008	-1.2207		83.8125	-2.56348
	83.8984	-1.09863		83.9062	-2.19727
	84	-0.91553		84	-1.95312
	84.0977	-0.91553		84.125	-2.38037
	84.1992	-0.61035		84.2188	-2.0752
	84.3008	-1.46484		84.3125	-2.44141
	84.3984	-0.97656		84.4062	-2.68555
	84.5	-0.97656		84.5	-2.50244
	84.5977	-0.79346		84.625	-2.50244
	84.6992	-0.61035		84.7188	-2.44141
	84.8008	-0.24414		84.8125	-1.77002
	84.8984	-0.91553		84.9062	-2.2583
	85	-1.2207		85	-2.13623
	85.0977	-1.28174		85.125	-2.0752
	85.1992	-1.0376		85.2188	-2.31934
	85.3008	-0.79346		85.3125	-1.95312
	85.3984	-1.58691		85.4062	-2.2583
	85.5	-1.09863		85.5	-1.77002
	85.5977	-1.46484		85.625	-2.0752
	85.6992	-1.09863		85.7188	-1.70898
	85.8008	-1.34277		85.8125	-2.31934
	85.8984	-1.40381		85.9062	-2.19727
	86	-1.28174		86	-1.95312
	86.0977	-1.58691		86.125	-2.38037
	86.1992	-1.64795		86.2188	-1.89209
	86.3008	-1.58691		86.3125	-2.13623
	86.3984	-1.15967		86.4062	-1.70898
	86.5	-1.46484		86.5	-2.01416
	86.5977	-0.91553		86.625	-1.83105
	86.6992	-1.2207		86.7188	-1.77002
	86.8008	-2.01416		86.8125	-2.01416
	86.8984	-2.01416		86.9062	-2.31934
	87	-2.31934		87	-2.56348
	87.0977	-1.95312		87.125	-2.0752
	87.1992	-2.13623		87.2188	-2.38037
	87.3008	-2.2583		87.3125	-1.83105
	87.3984	-2.44141		87.4062	-2.38037
	87.5	-2.13623		87.5	-2.13623
	87.5977	-2.2583		87.625	-2.56348
	87.6992	-1.95312		87.7188	-2.50244
	87.8008	-1.83105		87.8125	-2.68555
	87.8984	-2.31934		87.9062	-2.56348
	88	-1.46484		88	-2.44141
	88.0977	-1.70898		88.125	-2.80762
	88.1992	-1.46484		88.2188	-2.31934
	88.3008	-1.34277		88.3125	-2.56348
	88.3984	-1.83105		88.4062	-2.0752
	88.5	-1.58691		88.5	-2.44141
	88.5977	-1.40381		88.625	-2.31934
	88.6992	-1.46484		88.7188	-2.0752
	88.8008	-1.34277		88.8125	-2.2583
	88.8984	-1.09863		88.9062	-2.38037
	89	-1.58691		89	-1.77002
	89.0977	-1.28174		89.125	-1.70898
	89.1992	-1.52588		89.2188	-1.83105
	89.3008	-1.52588		89.3125	-1.95312
	89.3984	-1.28174		89.4062	-2.44141
	89.5	-1.15967		89.5	-2.0752
	89.5977	-1.28174		89.625	-2.2583
	89.6992	-1.28174		89.7188	-1.89209
	89.8008	-1.09863		89.8125	-2.01416
	89.8984	-1.40381		89.9062	-2.31934
	90	-0.18311		90	-2.19727
	90.0977	-0.54932		90.125	-2.74658
	90.1992	-0.24414		90.2188	-2.38037
	90.3008	-0.30518		90.3125	-2.86865
	90.3984	-0.54932		90.4062	-2.80762
	90.5	-0.42725		90.5	-3.23486
	90.5977	-0.91553		90.625	-3.05176
	90.6992	-0.79346		90.7188	-2.99072
	90.8008	-0.30518		90.8125	-2.74658
	90.8984	-0.85449		90.9062	-2.80762
	91	-1.28174		91	-2.56348
	91.0977	-0.97656		91.125	-2.44141
	91.1992	-1.34277		91.2188	-2.74658
	91.3008	-0.85449		91.3125	-2.56348
	91.3984	-1.2207		91.4062	-2.80762
	91.5	-1.34277		91.5	-2.56348
	91.5977	-0.85449		91.625	-2.44141
	91.6992	-1.09863		91.7188	-2.80762
	91.8008	-0.91553		91.8125	-2.31934
	91.8984	-1.34277		91.9062	-2.74658
	92	-1.40381		92	-2.44141
	92.0977	-1.95312		92.125	-2.44141
	92.1992	-1.15967		92.2188	-2.01416
	92.3008	-1.34277		92.3125	-2.2583
	92.3984	-1.64795		92.4062	-1.77002
	92.5	-1.09863		92.5	-1.77002
	92.5977	-1.52588		92.625	-2.19727
	92.6992	-0.85449		92.7188	-1.64795
	92.8008	-0.91553		92.8125	-2.2583
	92.8984	-0.91553		92.9062	-1.70898
	93	-0.36621		93	-1.58691
	93.0977	-0.42725		93.125	-1.70898
	93.1992	-0.85449		93.2188	-1.58691
	93.3008	-0.42725		93.3125	-1.2207
	93.3984	-1.15967		93.4062	-1.58691
	93.5	-1.0376		93.5	-1.58691
	93.5977	-0.54932		93.625	-1.58691
	93.6992	-1.15967		93.7188	-2.0752
	93.8008	-0.91553		93.8125	-1.70898
	93.8984	-1.2207		93.9062	-2.13623
	94	-0.79346		94	-1.89209
	94.0977	-0.91553		94.125	-1.89209
	94.1992	-0.73242		94.2188	-1.58691
	94.3008	-1.09863		94.3125	-1.70898
	94.3984	-0.97656		94.4062	-1.77002
	94.5	-1.15967		94.5	-1.70898
	94.5977	-1.64795		94.625	-2.19727
	94.6992	-0.97656		94.7188	-1.52588
	94.8008	-1.34277		94.8125	-1.70898
	94.8984	-1.28174		94.9062	-1.34277
	95	-1.0376		95	-1.89209
	95.0977	-0.67139		95.125	-2.0752
	95.1992	-0.85449		95.2188	-1.70898
	95.3008	-1.0376		95.3125	-1.83105
	95.3984	-1.46484		95.4062	-1.83105
	95.5	-1.2207		95.5	-1.83105
	95.5977	-1.15967		95.625	-2.01416
	95.6992	-1.52588		95.7188	-2.01416
	95.8008	-1.64795		95.8125	-1.40381
	95.8984	-1.52588		95.9062	-1.95312
	96	-0.85449		96	-1.83105
	96.0977	-0.85449		96.125	-2.19727
	96.1992	-0.85449		96.2188	-1.95312
	96.3008	-0.85449		96.3125	-1.52588
	96.3984	-1.15967		96.4062	-1.95312
	96.5	-1.0376		96.5	-1.83105
	96.5977	-1.28174		96.625	-1.77002
	96.6992	-0.73242		96.7188	-1.58691
	96.8008	-0.91553		96.8125	-1.89209
	96.8984	-0.67139		96.9062	-1.2207
	97	-0.79346		97	-2.01416
	97.0977	-1.09863		97.125	-1.40381
	97.1992	-1.0376		97.2188	-1.52588
	97.3008	-1.09863		97.3125	-1.77002
	97.3984	-0.91553		97.4062	-1.40381
	97.5	-0.85449		97.5	-2.01416
	97.5977	-1.0376		97.625	-1.89209
	97.6992	-0.91553		97.7188	-1.15967
	97.8008	-0.73242		97.8125	-1.46484
	97.8984	-0.97656		97.9062	-2.01416
	98	-0.61035		98	-1.15967
	98.0977	-0.42725		98.125	-1.70898
	98.1992	-0.91553		98.2188	-1.77002
	98.3008	-0.79346		98.3125	-1.70898
	98.3984	-1.52588		98.4062	-2.13623
	98.5	-1.28174		98.5	-1.58691
	98.5977	-1.15967		98.625	-1.64795
	98.6992	-1.28174		98.7188	-1.64795
	98.8008	-1.64795		98.8125	-1.34277
	98.8984	-2.2583		98.9062	-1.64795
	99	-1.95312		99	-2.0752
	99.0977	-2.01416		99.125	-1.89209
	99.1992	-1.46484		99.2188	-1.70898
	99.3008	-1.89209		99.3125	-1.89209
	99.3984	-1.95312		99.4062	-1.58691
	99.5	-1.83105		99.5	-2.0752
	99.5977	-1.95312		99.625	-1.46484
	99.6992	-2.13623		99.7188	-1.64795
	99.8008	-2.0752		99.8125	-1.58691
	99.8984	-2.38037		99.9062	-1.34277
	100	-2.50244		100	-1.2207
	100.098	-2.44141		100.125	-1.77002
	100.199	-2.13623		100.219	-1.52588
	100.301	-1.46484		100.312	-1.28174
	100.398	-1.28174		100.406	-1.52588
	100.5	-1.40381		100.5	-0.67139
	100.598	-1.58691		100.625	-0.91553
	100.699	-1.46484		100.719	-0.85449
	100.801	-1.95312		100.812	-0.73242
	100.898	-2.0752		100.906	-1.2207
	101	-1.70898		101	-0.79346
	101.098	-2.0752		101.125	-1.2207
	101.199	-1.95312		101.219	-0.97656
	101.301	-2.31934		101.312	-1.09863
	101.398	-1.83105		101.406	-1.0376
	101.5	-1.83105		101.5	-1.09863
	101.598	-1.77002		101.625	-0.85449
	101.699	-1.83105		101.719	-1.0376
	101.801	-1.52588		101.812	-0.79346
	101.898	-2.0752		101.906	-0.79346
	102	-2.13623		102	-1.09863
	102.098	-1.83105		102.125	-0.85449
	102.199	-2.19727		102.219	-1.52588
	102.301	-2.01416		102.312	-1.58691
	102.398	-2.68555		102.406	-1.83105
	102.5	-2.2583		102.5	-1.70898
	102.598	-1.95312		102.625	-1.95312
	102.699	-2.01416		102.719	-1.64795
	102.801	-1.70898		102.812	-2.31934
	102.898	-2.13623		102.906	-2.86865
	103	-1.70898		103	-2.44141
	103.098	-1.83105		103.125	-3.05176
	103.199	-1.34277		103.219	-2.62451
	103.301	-1.95312		103.312	-2.74658
	103.398	-1.89209		103.406	-2.86865
	103.5	-2.01416		103.5	-2.68555
	103.598	-1.89209		103.625	-2.44141
	103.699	-1.58691		103.719	-2.62451
	103.801	-1.95312		103.812	-2.80762
	103.898	-1.77002		103.906	-2.44141
	104	-2.0752		104	-2.99072
	104.098	-1.95312		104.125	-2.80762
	104.199	-1.89209		104.219	-2.92969
	104.301	-1.58691		104.312	-2.56348
	104.398	-2.19727		104.406	-2.80762
	104.5	-1.40381		104.5	-2.68555
	104.598	-1.77002		104.625	-2.99072
	104.699	-2.2583		104.719	-2.74658
	104.801	-1.58691		104.812	-3.05176
	104.898	-2.31934		104.906	-2.99072
	105	-1.77002		105	-2.92969
	105.098	-1.46484		105.125	-2.99072
	105.199	-1.28174		105.219	-3.23486
	105.301	-1.09863		105.312	-3.17383
	105.398	-1.0376		105.406	-2.99072
	105.5	-1.58691		105.5	-2.86865
	105.598	-1.46484		105.625	-2.92969
	105.699	-1.58691		105.719	-3.11279
	105.801	-2.13623		105.812	-2.56348
	105.898	-1.95312		105.906	-2.31934
	106	-2.38037		106	-2.2583
	106.098	-2.2583		106.125	-2.19727
	106.199	-2.19727		106.219	-2.2583
	106.301	-2.13623		106.312	-1.83105
	106.398	-2.56348		106.406	-2.01416
	106.5	-2.0752		106.5	-1.52588
	106.598	-2.19727		106.625	-2.01416
	106.699	-2.2583		106.719	-1.70898
	106.801	-1.70898		106.812	-1.83105
	106.898	-2.56348		106.906	-2.19727
	107	-1.77002		107	-1.83105
	107.098	-2.31934		107.125	-2.56348
	107.199	-2.0752		107.219	-2.01416
	107.301	-2.01416		107.312	-2.44141
	107.398	-2.44141		107.406	-2.50244
	107.5	-2.31934		107.5	-2.86865
	107.598	-2.38037		107.625	-2.56348
	107.699	-2.2583		107.719	-2.38037
	107.801	-2.68555		107.812	-2.0752
	107.898	-2.56348		107.906	-2.01416
	108	-2.80762		108	-2.31934
	108.098	-1.89209		108.125	-2.19727
	108.199	-2.31934		108.219	-2.13623
	108.301	-2.50244		108.312	-1.89209
	108.398	-2.44141		108.406	-1.95312
	108.5	-2.56348		108.5	-2.19727
	108.598	-2.38037		108.625	-1.64795
	108.699	-2.19727		108.719	-2.01416
	108.801	-2.01416		108.812	-1.70898
	108.898	-2.2583		108.906	-1.89209
	109	-1.52588		109	-0.91553
	109.098	-1.70898		109.125	-1.58691
	109.199	-1.28174		109.219	-1.52588
	109.301	-1.83105		109.312	-1.95312
	109.398	-2.01416		109.406	-2.13623
	109.5	-1.34277		109.5	-2.0752
	109.598	-1.52588		109.625	-2.74658
	109.699	-1.09863		109.719	-2.38037
	109.801	-0.85449		109.812	-2.86865
	109.898	-0.91553		109.906	-2.68555
	110	-0.91553		110	-2.50244
	110.098	-0.42725		110.125	-2.01416
	110.199	-1.34277		110.219	-2.38037
	110.301	-1.83105		110.312	-2.31934
	110.398	-1.58691		110.406	-2.50244
	110.5	-2.01416		110.5	-2.92969
	110.598	-1.2207		110.625	-2.50244
	110.699	-1.58691		110.719	-3.23486
	110.801	-1.15967		110.812	-2.92969
	110.898	-1.40381		110.906	-3.05176
	111	-1.40381		111	-2.99072
	111.098	-1.46484		111.125	-2.99072
	111.199	-1.15967		111.219	-2.68555
	111.301	-1.28174		111.312	-2.86865
	111.398	-1.77002		111.406	-3.11279
	111.5	-1.0376		111.5	-2.50244
	111.598	-1.58691		111.625	-3.11279
	111.699	-1.28174		111.719	-2.31934
	111.801	-1.28174		111.812	-2.99072
	111.898	-1.40381		111.906	-2.68555
	112	-1.09863		112	-2.38037
	112.098	-1.40381		112.125	-2.31934
	112.199	-1.64795		112.219	-2.0752
	112.301	-1.64795		112.312	-2.01416
	112.398	-1.70898		112.406	-2.01416
	112.5	-1.89209		112.5	-2.19727
	112.598	-1.46484		112.625	-1.58691
	112.699	-1.70898		112.719	-1.89209
	112.801	-1.70898		112.812	-1.0376
	112.898	-2.2583		112.906	-1.89209
	113	-1.64795		113	-1.64795
	113.098	-1.40381		113.125	-1.46484
	113.199	-1.0376		113.219	-1.77002
	113.301	-1.28174		113.312	-1.64795
	113.398	-1.64795		113.406	-1.89209
	113.5	-1.58691		113.5	-1.58691
	113.598	-1.64795		113.625	-2.13623
	113.699	-1.34277		113.719	-1.2207
	113.801	-1.58691		113.812	-2.01416
	113.898	-1.52588		113.906	-1.64795
	114	-1.46484		114	-1.64795
	114.098	-1.46484		114.125	-1.83105
	114.199	-1.28174		114.219	-1.28174
	114.301	-1.2207		114.312	-1.77002
	114.398	-1.52588		114.406	-1.70898
	114.5	-1.58691		114.5	-1.64795
	114.598	-1.40381		114.625	-1.46484
	114.699	-1.15967		114.719	-1.64795
	114.801	-0.79346		114.812	-1.0376
	114.898	-1.46484		114.906	-1.34277
	115	-1.52588		115	-1.15967
	115.098	-1.2207		115.125	-1.09863
	115.199	-1.28174		115.219	-1.77002
	115.301	-1.28174		115.312	-1.40381
	115.398	-1.70898		115.406	-2.19727
	115.5	-1.28174		115.5	-1.70898
	115.598	-1.2207		115.625	-1.58691
	115.699	-1.0376		115.719	-1.58691
	115.801	-1.2207		115.812	-2.01416
	115.898	-1.34277		115.906	-1.58691
	116	-0.79346		116	-2.19727
	116.098	-1.52588		116.125	-2.38037
	116.199	-0.97656		116.219	-1.70898
	116.301	-1.28174		116.312	-2.13623
	116.398	-1.0376		116.406	-1.64795
	116.5	-1.40381		116.5	-1.89209
	116.598	-1.15967		116.625	-2.31934
	116.699	-1.09863		116.719	-2.0752
	116.801	-1.0376		116.812	-2.0752
	116.898	-1.0376		116.906	-2.62451
	117	-1.2207		117	-2.44141
	117.098	-0.91553		117.125	-2.44141
	117.199	-1.40381		117.219	-2.38037
	117.301	-1.09863		117.312	-1.77002
	117.398	-1.40381		117.406	-2.01416
	117.5	-0.91553		117.5	-1.52588
	117.598	-1.2207		117.625	-1.34277
	117.699	-0.67139		117.719	-1.46484
	117.801	-0.97656		117.812	-1.58691
	117.898	-1.2207		117.906	-1.64795
	118	-1.28174		118	-1.52588
	118.098	-1.34277		118.125	-1.64795
	118.199	-1.34277		118.219	-1.77002
	118.301	-1.52588		118.312	-2.13623
	118.398	-1.58691		118.406	-1.58691
	118.5	-1.64795		118.5	-1.95312
	118.598	-1.83105		118.625	-1.70898
	118.699	-2.13623		118.719	-1.2207
	118.801	-2.01416		118.812	-1.34277
	118.898	-2.01416		118.906	-1.2207
	119	-2.13623		119	-1.58691
	119.098	-1.95312		119.125	-1.46484
	119.199	-2.0752		119.219	-1.28174
	119.301	-2.01416		119.312	-1.34277
	119.398	-2.2583		119.406	-1.52588
	119.5	-1.89209		119.5	-1.2207
	119.598	-1.95312		119.625	-1.83105
	119.699	-2.01416		119.719	-1.34277
	119.801	-2.2583		119.812	-1.34277
	119.898	-2.50244		119.906	-1.70898
	120	-2.62451		120	-1.46484
	120.098	-2.92969		120.125	-1.58691
	120.199	-2.31934		120.219	-1.40381
	120.301	-2.74658		120.312	-1.15967
	120.398	-2.31934		120.406	-1.0376
	120.5	-1.95312		120.5	-1.0376
	120.598	-2.0752		120.625	-1.0376
	120.699	-2.31934		120.719	-0.97656
	120.801	-2.62451		120.812	-1.40381
	120.898	-2.56348		120.906	-1.09863
	121	-2.2583		121	-1.2207
	121.098	-2.01416		121.125	-0.79346
	121.199	-2.44141		121.219	-1.28174
	121.301	-1.89209		121.312	-1.15967
	121.398	-2.2583		121.406	-1.64795
	121.5	-1.95312		121.5	-1.2207
	121.598	-1.83105		121.625	-1.77002
	121.699	-2.56348		121.719	-1.83105
	121.801	-2.13623		121.812	-1.83105
	121.898	-2.44141		121.906	-2.31934
	122	-2.19727		122	-2.31934
	122.098	-2.19727		122.125	-2.19727
	122.199	-1.77002		122.219	-1.83105
	122.301	-2.19727		122.312	-2.01416
	122.398	-2.0752		122.406	-1.95312
	122.5	-2.38037		122.5	-2.19727
	122.598	-2.38037		122.625	-2.01416
	122.699	-1.58691		122.719	-2.0752
	122.801	-2.13623		122.812	-2.2583
	122.898	-2.01416		122.906	-2.13623
	123	-2.19727		123	-2.2583
	123.098	-2.38037		123.125	-1.95312
	123.199	-2.13623		123.219	-1.95312
	123.301	-1.95312		123.312	-1.40381
	123.398	-2.31934		123.406	-2.0752
	123.5	-2.56348		123.5	-2.01416
	123.598	-2.62451		123.625	-1.95312
	123.699	-2.80762		123.719	-2.0752
	123.801	-1.95312		123.812	-1.64795
	123.898	-2.2583		123.906	-1.95312
	124	-2.19727		124	-1.83105
	124.098	-2.13623		124.125	-2.2583
	124.199	-1.89209		124.219	-1.89209
	124.301	-1.89209		124.312	-2.01416
	124.398	-2.0752		124.406	-1.89209
	124.5	-1.89209		124.5	-1.64795
	124.598	-2.2583		124.625	-1.64795
	124.699	-1.89209		124.719	-1.2207
	124.801	-2.38037		124.812	-1.83105
	124.898	-1.77002		124.906	-1.46484
	125	-2.2583		125	-1.70898
	125.098	-2.19727		125.125	-1.58691
	125.199	-1.95312		125.219	-2.01416
	125.301	-1.83105		125.312	-1.95312
	125.398	-1.64795		125.406	-2.0752
	125.5	-1.15967		125.5	-2.01416
	125.598	-1.46484		125.625	-2.01416
	125.699	-1.64795		125.719	-2.31934
	125.801	-1.77002		125.812	-1.95312
	125.898	-2.2583		125.906	-2.50244
	126	-1.77002		126	-1.70898
	126.098	-2.2583		126.125	-2.19727
	126.199	-2.50244		126.219	-2.0752
	126.301	-1.95312		126.312	-1.95312
	126.398	-2.74658		126.406	-2.44141
	126.5	-2.56348		126.5	-1.58691
	126.598	-2.62451		126.625	-1.95312
	126.699	-2.50244		126.719	-1.64795
	126.801	-2.38037		126.812	-1.70898
	126.898	-2.50244		126.906	-1.58691
	127	-3.11279		127	-2.01416
	127.098	-2.56348		127.125	-2.01416
	127.199	-2.56348		127.219	-1.64795
	127.301	-2.92969		127.312	-1.64795
	127.398	-2.2583		127.406	-1.46484
	127.5	-2.92969		127.5	-2.2583
	127.598	-3.05176		127.625	-2.0752
	127.699	-2.74658		127.719	-1.83105
	127.801	-3.05176		127.812	-1.58691
	127.898	-2.99072		127.906	-2.0752
	128	-2.44141		128	-1.77002
	128.098	-2.92969		128.125	-2.2583
	128.199	-2.92969		128.219	-1.64795
	128.301	-2.31934		128.312	-1.2207
	128.398	-2.74658		128.406	-1.70898
	128.5	-2.19727		128.5	-1.15967
	128.598	-2.80762		128.625	-1.64795
	128.699	-2.44141		128.719	-1.28174
	128.801	-2.31934		128.812	-1.34277
	128.898	-2.31934		128.906	-1.34277
	129	-2.2583		129	-1.2207
	129.098	-2.13623		129.125	-1.15967
	129.199	-2.01416		129.219	-1.52588
	129.301	-2.19727		129.312	-1.64795
	129.398	-1.40381		129.406	-1.83105
	129.5	-2.01416		129.5	-2.50244
	129.598	-1.15967		129.625	-2.31934
	129.699	-1.83105		129.719	-2.56348
	129.801	-1.46484		129.812	-2.44141
	129.898	-1.46484		129.906	-2.31934
	130	-1.34277		130	-2.19727
	130.098	-1.52588		130.125	-2.0752
	130.199	-1.58691		130.219	-2.0752
	130.301	-1.64795		130.312	-2.13623
	130.398	-1.95312		130.406	-2.92969
	130.5	-1.77002		130.5	-2.31934
	130.598	-1.83105		130.625	-2.86865
	130.699	-1.46484		130.719	-2.01416
	130.801	-0.91553		130.812	-2.31934
	130.898	-1.09863		130.906	-2.19727
	131	-0.97656		131	-2.19727
	131.098	-1.0376		131.125	-2.92969
	131.199	-1.0376		131.219	-2.44141
	131.301	-1.58691		131.312	-2.0752
	131.398	-1.2207		131.406	-2.0752
	131.5	-1.34277		131.5	-2.38037
	131.598	-1.15967		131.625	-2.01416
	131.699	-1.58691		131.719	-2.50244
	131.801	-1.58691		131.812	-1.64795
	131.898	-1.83105		131.906	-2.19727
	132	-2.0752		132	-2.31934
	132.098	-1.58691		132.125	-2.13623
	132.199	-1.77002		132.219	-2.38037
	132.301	-1.52588		132.312	-2.01416
	132.398	-1.64795		132.406	-1.77002
	132.5	-1.15967		132.5	-1.64795
	132.598	-1.64795		132.625	-1.95312
	132.699	-1.40381		132.719	-1.34277
	132.801	-1.64795		132.812	-1.70898
	132.898	-1.89209		132.906	-1.52588
	133	-1.46484		133	-1.40381
	133.098	-1.70898		133.125	-1.89209
	133.199	-1.15967		133.219	-1.34277
	133.301	-1.40381		133.312	-1.52588
	133.398	-1.28174		133.406	-1.52588
	133.5	-1.46484		133.5	-1.09863
	133.598	-0.73242		133.625	-1.09863
	133.699	-1.09863		133.719	-1.15967
	133.801	-1.28174		133.812	-0.79346
	133.898	-1.28174		133.906	-1.34277
	134	-1.70898		134	-1.15967
	134.098	-1.34277		134.125	-0.91553
	134.199	-1.58691		134.219	-0.97656
	134.301	-1.34277		134.312	-0.73242
	134.398	-1.64795		134.406	-1.15967
	134.5	-0.79346		134.5	-1.40381
	134.598	-1.34277		134.625	-1.52588
	134.699	-1.34277		134.719	-1.40381
	134.801	-1.52588		134.812	-1.70898
	134.898	-1.83105		134.906	-1.40381
	135	-1.40381		135	-1.15967
	135.098	-1.40381		135.125	-1.28174
	135.199	-1.40381		135.219	-0.97656
	135.301	-1.46484		135.312	-1.58691
	135.398	-1.70898		135.406	-1.28174
	135.5	-1.70898		135.5	-1.46484
	135.598	-1.70898		135.625	-1.52588
	135.699	-1.46484		135.719	-1.40381
	135.801	-1.52588		135.812	-1.70898
	135.898	-0.97656		135.906	-1.89209
	136	-1.64795		136	-1.64795
	136.098	-1.15967		136.125	-1.64795
	136.199	-1.0376		136.219	-2.01416
	136.301	-0.67139		136.312	-1.46484
	136.398	-0.85449		136.406	-1.83105
	136.5	-0.85449		136.5	-1.28174
	136.598	-1.0376		136.625	-1.40381
	136.699	-0.91553		136.719	-1.64795
	136.801	-0.97656		136.812	-1.15967
	136.898	-0.85449		136.906	-1.46484
	137	-0.42725		137	-1.28174
	137.098	-1.2207		137.125	-1.58691
	137.199	-0.97656		137.219	-1.09863
	137.301	-1.15967		137.312	-1.40381
	137.398	-1.2207		137.406	-0.91553
	137.5	-1.09863		137.5	-1.2207
	137.598	-1.46484		137.625	-1.40381
	137.699	-1.34277		137.719	-1.09863
	137.801	-1.46484		137.812	-1.58691
	137.898	-1.58691		137.906	-1.15967
	138	-1.34277		138	-1.40381
	138.098	-0.91553		138.125	-1.64795
	138.199	-1.64795		138.219	-1.83105
	138.301	-1.28174		138.312	-1.34277
	138.398	-1.40381		138.406	-1.77002
	138.5	-1.83105		138.5	-1.52588
	138.598	-1.58691		138.625	-1.77002
	138.699	-2.01416		138.719	-1.64795
	138.801	-1.95312		138.812	-1.95312
	138.898	-1.89209		138.906	-2.0752
	139	-1.58691		139	-1.95312
	139.098	-1.77002		139.125	-1.89209
	139.199	-1.34277		139.219	-1.89209
	139.301	-2.13623		139.312	-1.46484
	139.398	-2.2583		139.406	-1.52588
	139.5	-1.95312		139.5	-1.40381
	139.598	-2.13623		139.625	-1.64795
	139.699	-1.58691		139.719	-0.73242
	139.801	-1.83105		139.812	-1.28174
	139.898	-1.95312		139.906	-1.40381
	140	-1.95312		140	-1.70898
	140.098	-1.89209		140.125	-1.09863
	140.199	-1.83105		140.219	-1.28174
	140.301	-1.46484		140.312	-0.97656
	140.398	-2.19727		140.406	-0.97656
	140.5	-2.68555		140.5	-0.85449
	140.598	-2.38037		140.625	-1.0376
	140.699	-2.56348		140.719	-1.15967
	140.801	-1.83105		140.812	-0.85449
	140.898	-2.44141		140.906	-1.09863
	141	-2.31934		141	-0.97656
	141.098	-2.31934		141.125	-1.28174
	141.199	-1.95312		141.219	-1.09863
	141.301	-2.01416		141.312	-1.64795
	141.398	-1.95312		141.406	-1.52588
	141.5	-1.95312		141.5	-1.52588
	141.598	-2.62451		141.625	-1.77002
	141.699	-1.89209		141.719	-1.58691
	141.801	-2.2583		141.812	-1.77002
	141.898	-1.34277		141.906	-1.70898
	142	-1.46484		142	-1.46484
	142.098	-1.95312		142.125	-1.58691
	142.199	-1.89209		142.219	-1.34277
	142.301	-2.50244		142.312	-1.46484
	142.398	-2.31934		142.406	-1.64795
	142.5	-2.38037		142.5	-2.01416
	142.598	-2.01416		142.625	-1.89209
	142.699	-2.0752		142.719	-2.13623
	142.801	-1.2207		142.812	-1.77002
	142.898	-1.95312		142.906	-2.2583
	143	-1.95312		143	-2.19727
	143.098	-1.95312		143.125	-2.68555
	143.199	-2.2583		143.219	-2.86865
	143.301	-1.52588		143.312	-2.50244
	143.398	-2.13623		143.406	-2.80762
	143.5	-2.2583		143.5	-2.56348
	143.598	-2.13623		143.625	-2.80762
	143.699	-2.13623		143.719	-2.31934
	143.801	-2.01416		143.812	-2.74658
	143.898	-1.64795		143.906	-2.2583
	144	-1.77002		144	-2.2583
	144.098	-2.44141		144.125	-2.01416
	144.199	-2.0752		144.219	-1.95312
	144.301	-2.38037		144.312	-2.31934
	144.398	-2.2583		144.406	-2.19727
	144.5	-2.74658		144.5	-2.19727
	144.598	-2.74658		144.625	-2.2583
	144.699	-2.31934		144.719	-1.95312
	144.801	-2.01416		144.812	-1.89209
	144.898	-2.68555		144.906	-2.19727
	145	-2.0752		145	-1.83105
	145.098	-1.70898		145.125	-2.13623
	145.199	-2.19727		145.219	-2.19727
	145.301	-1.70898		145.312	-1.64795
	145.398	-2.31934		145.406	-1.95312
	145.5	-1.52588		145.5	-1.64795
	145.598	-2.13623		145.625	-1.89209
	145.699	-2.50244		145.719	-1.95312
	145.801	-2.62451		145.812	-2.13623
	145.898	-2.50244		145.906	-1.89209
	146	-2.44141		146	-2.13623
	146.098	-1.77002		146.125	-1.70898
	146.199	-2.19727		146.219	-1.77002
	146.301	-2.50244		146.312	-2.0752
	146.398	-2.31934		146.406	-1.70898
	146.5	-2.68555		146.5	-2.0752
	146.598	-2.38037		146.625	-1.77002
	146.699	-2.44141		146.719	-1.70898
	146.801	-2.56348		146.812	-1.58691
	146.898	-3.479		146.906	-2.01416
	147	-3.66211		147	-1.64795
	147.098	-3.66211		147.125	-1.83105
	147.199	-3.41797		147.219	-1.77002
	147.301	-3.05176		147.312	-1.64795
	147.398	-2.92969		147.406	-2.50244
	147.5	-1.95312		147.5	-1.77002
	147.598	-2.13623		147.625	-2.56348
	147.699	-2.31934		147.719	-2.44141
	147.801	-2.56348		147.812	-2.2583
	147.898	-2.99072		147.906	-2.50244
	148	-2.62451		148	-2.0752
	148.098	-2.80762		148.125	-1.95312
	148.199	-2.38037		148.219	-2.0752
	148.301	-2.38037		148.312	-2.0752
	148.398	-2.0752		148.406	-1.34277
	148.5	-2.0752		148.5	-2.01416
	148.598	-1.64795		148.625	-1.58691
	148.699	-1.83105		148.719	-1.52588
	148.801	-2.0752		148.812	-1.34277
	148.898	-1.70898		148.906	-1.09863
	149	-1.77002		149	-1.95312
	149.098	-1.40381		149.125	-1.89209
	149.199	-1.77002		149.219	-1.89209
	149.301	-1.58691		149.312	-1.52588
	149.398	-1.95312		149.406	-2.13623
	149.5	-1.64795		149.5	-1.83105
	149.598	-1.52588		149.625	-2.74658
	149.699	-1.77002		149.719	-2.01416
	149.801	-1.64795		149.812	-2.19727
	149.898	-2.13623		149.906	-2.44141
	150	-1.77002		150	-2.19727
	150.098	-2.01416		150.125	-2.99072
	150.199	-1.46484		150.219	-2.80762
	150.301	-1.95312		150.312	-2.68555
	150.398	-1.77002		150.406	-2.68555
	150.5	-1.64795		150.5	-3.23486
	150.598	-1.52588		150.625	-2.74658
	150.699	-1.34277		150.719	-2.92969
	150.801	-1.46484		150.812	-2.62451
	150.898	-1.28174		150.906	-2.13623
	151	-1.64795		151	-2.56348
	151.098	-1.77002		151.125	-1.89209
	151.199	-1.58691		151.219	-2.19727
	151.301	-1.40381		151.312	-2.50244
	151.398	-1.64795		151.406	-2.31934
	151.5	-1.09863		151.5	-2.19727
	151.598	-0.73242		151.625	-2.19727
	151.699	-1.0376		151.719	-1.83105
	151.801	-0.91553		151.812	-1.77002
	151.898	-1.46484		151.906	-2.50244
	152	-1.34277		152	-2.0752
	152.098	-1.58691		152.125	-2.56348
	152.199	-1.40381		152.219	-1.95312
	152.301	-1.52588		152.312	-2.01416
	152.398	-1.46484		152.406	-2.0752
	152.5	-1.95312		152.5	-1.52588
	152.598	-1.83105		152.625	-1.77002
	152.699	-1.95312		152.719	-1.64795
	152.801	-2.2583		152.812	-1.64795
	152.898	-1.34277		152.906	-1.83105
	153	-1.70898		153	-2.50244
	153.098	-1.34277		153.125	-2.0752
	153.199	-1.52588		153.219	-2.2583
	153.301	-1.52588		153.312	-2.01416
	153.398	-1.58691		153.406	-1.77002
	153.5	-1.52588		153.5	-1.83105
	153.598	-1.58691		153.625	-1.52588
	153.699	-1.89209		153.719	-1.89209
	153.801	-1.34277		153.812	-1.77002
	153.898	-2.01416		153.906	-1.95312
	154	-1.40381		154	-1.52588
	154.098	-1.64795		154.125	-1.83105
	154.199	-1.34277		154.219	-1.09863
	154.301	-1.58691		154.312	-1.28174
	154.398	-2.0752		154.406	-1.70898
	154.5	-2.0752		154.5	-1.70898
	154.598	-2.19727		154.625	-2.0752
	154.699	-1.89209		154.719	-1.77002
	154.801	-2.31934		154.812	-1.89209
	154.898	-2.0752		154.906	-1.70898
	155	-2.92969		155	-1.83105
	155.098	-2.56348		155.125	-1.77002
	155.199	-2.68555		155.219	-1.95312
	155.301	-2.2583		155.312	-1.89209
	155.398	-2.19727		155.406	-2.31934
	155.5	-2.50244		155.5	-2.2583
	155.598	-2.50244		155.625	-2.0752
	155.699	-2.13623		155.719	-1.77002
	155.801	-2.01416		155.812	-1.64795
	155.898	-2.31934		155.906	-1.40381
	156	-2.0752		156	-1.46484
	156.098	-2.13623		156.125	-1.46484
	156.199	-1.46484		156.219	-0.91553
	156.301	-1.34277		156.312	-1.52588
	156.398	-1.70898		156.406	-1.52588
	156.5	-0.73242		156.5	-1.64795
	156.598	-1.46484		156.625	-2.01416
	156.699	-0.91553		156.719	-1.95312
	156.801	-1.0376		156.812	-2.31934
	156.898	-0.91553		156.906	-2.13623
	157	-1.28174		157	-2.0752
	157.098	-0.73242		157.125	-2.0752
	157.199	-1.58691		157.219	-2.19727
	157.301	-1.64795		157.312	-1.83105
	157.398	-1.2207		157.406	-1.95312
	157.5	-1.52588		157.5	-2.01416
	157.598	-1.0376		157.625	-1.95312
	157.699	-1.52588		157.719	-1.83105
	157.801	-1.34277		157.812	-1.77002
	157.898	-1.40381		157.906	-1.89209
	158	-1.40381		158	-1.40381
	158.098	-1.70898		158.125	-1.89209
	158.199	-1.34277		158.219	-1.58691
	158.301	-1.46484		158.312	-1.70898
	158.398	-1.52588		158.406	-2.0752
	158.5	-1.34277		158.5	-1.40381
	158.598	-1.77002		158.625	-2.01416
	158.699	-1.46484		158.719	-1.64795
	158.801	-1.83105		158.812	-2.44141
	158.898	-1.70898		158.906	-2.19727
	159	-1.2207		159	-2.13623
	159.098	-1.0376		159.125	-2.01416
	159.199	-1.46484		159.219	-2.19727
	159.301	-1.77002		159.312	-2.31934
	159.398	-2.31934		159.406	-1.83105
	159.5	-2.56348		159.5	-2.13623
	159.598	-2.31934		159.625	-1.58691
	159.699	-2.62451		159.719	-1.77002
	159.801	-1.89209		159.812	-1.2207
	159.898	-2.56348		159.906	-1.64795
	160	-2.62451		160	-1.28174
	160.098	-1.95312		160.125	-1.46484
	160.199	-1.77002		160.219	-1.40381
	160.301	-2.44141		160.312	-1.52588
	160.398	-2.38037		160.406	-1.46484
	160.5	-2.44141		160.5	-0.85449
	160.598	-2.56348		160.625	-1.15967
	160.699	-2.01416		160.719	-0.97656
	160.801	-2.2583		160.812	-1.09863
	160.898	-2.56348		160.906	-0.91553
	161	-2.92969		161	-0.79346
	161.098	-3.23486		161.125	-1.28174
	161.199	-2.13623		161.219	-0.85449
	161.301	-2.44141		161.312	-1.2207
	161.398	-2.19727		161.406	-1.52588
	161.5	-2.19727		161.5	-1.58691
	161.598	-1.95312		161.625	-1.2207
	161.699	-2.38037		161.719	-1.58691
	161.801	-1.89209		161.812	-1.0376
	161.898	-2.0752		161.906	-1.52588
	162	-2.19727		162	-1.34277
	162.098	-1.77002		162.125	-1.28174
	162.199	-2.44141		162.219	-2.31934
	162.301	-1.83105		162.312	-1.89209
	162.398	-2.19727		162.406	-2.62451
	162.5	-2.44141		162.5	-2.56348
	162.598	-2.19727		162.625	-2.86865
	162.699	-2.13623		162.719	-2.19727
	162.801	-2.19727		162.812	-2.62451
	162.898	-2.44141		162.906	-2.50244
	163	-2.31934		163	-2.62451
	163.098	-2.2583		163.125	-3.23486
	163.199	-2.01416		163.219	-2.31934
	163.301	-2.44141		163.312	-3.23486
	163.398	-2.2583		163.406	-2.68555
	163.5	-2.68555		163.5	-2.92969
	163.598	-3.05176		163.625	-2.86865
	163.699	-3.23486		163.719	-2.62451
	163.801	-3.11279		163.812	-2.31934
	163.898	-3.11279		163.906	-2.68555
	164	-2.56348		164	-2.80762
	164.098	-2.74658		164.125	-2.19727
	164.199	-2.74658		164.219	-2.86865
	164.301	-2.74658		164.312	-2.50244
	164.398	-2.74658		164.406	-3.05176
	164.5	-2.19727		164.5	-2.92969
	164.598	-2.13623		164.625	-2.86865
	164.699	-2.31934		164.719	-2.56348
	164.801	-1.95312		164.812	-2.62451
	164.898	-2.44141		164.906	-2.86865
	165	-2.31934		165	-2.50244
	165.098	-2.19727		165.125	-2.62451
	165.199	-1.83105		165.219	-1.95312
	165.301	-2.31934		165.312	-2.68555
	165.398	-2.19727		165.406	-2.19727
	165.5	-2.01416		165.5	-1.95312
	165.598	-1.70898		165.625	-1.95312
	165.699	-2.19727		165.719	-1.70898
	165.801	-2.74658		165.812	-2.19727
	165.898	-2.56348		165.906	-2.19727
	166	-2.50244		166	-2.01416
	166.098	-2.13623		166.125	-2.31934
	166.199	-2.2583		166.219	-2.44141
	166.301	-2.01416		166.312	-2.31934
	166.398	-2.50244		166.406	-2.92969
	166.5	-2.38037		166.5	-2.13623
	166.598	-2.31934		166.625	-2.31934
	166.699	-2.44141		166.719	-2.19727
	166.801	-2.68555		166.812	-1.83105
	166.898	-3.11279		166.906	-2.44141
	167	-2.99072		167	-2.19727
	167.098	-2.68555		167.125	-2.0752
	167.199	-2.86865		167.219	-2.19727
	167.301	-2.74658		167.312	-2.44141
	167.398	-2.50244		167.406	-2.0752
	167.5	-2.19727		167.5	-2.0752
	167.598	-2.68555		167.625	-2.0752
	167.699	-2.31934		167.719	-2.38037
	167.801	-2.62451		167.812	-2.62451
	167.898	-2.38037		167.906	-2.01416
	168	-2.62451		168	-2.50244
	168.098	-2.2583		168.125	-2.92969
	168.199	-2.68555		168.219	-2.62451
	168.301	-2.50244		168.312	-2.0752
	168.398	-2.56348		168.406	-2.50244
	168.5	-2.13623		168.5	-2.13623
	168.598	-1.95312		168.625	-2.38037
	168.699	-2.44141		168.719	-2.44141
	168.801	-1.77002		168.812	-1.95312
	168.898	-2.01416		168.906	-2.80762
	169	-1.64795		169	-2.0752
	169.098	-1.89209		169.125	-2.38037
	169.199	-1.34277		169.219	-2.19727
	169.301	-1.70898		169.312	-2.2583
	169.398	-1.77002		169.406	-2.31934
	169.5	-1.40381		169.5	-2.38037
	169.598	-1.52588		169.625	-2.19727
	169.699	-1.0376		169.719	-1.95312
	169.801	-1.77002		169.812	-2.38037
	169.898	-1.28174		169.906	-2.0752
	170	-1.28174		170	-2.56348
	170.098	-1.34277		170.125	-2.2583
	170.199	-1.40381		170.219	-2.50244
	170.301	-1.70898		170.312	-2.68555
	170.398	-2.19727		170.406	-2.80762
	170.5	-2.62451		170.5	-3.05176
	170.598	-1.89209		170.625	-2.80762
	170.699	-2.13623		170.719	-2.74658
	170.801	-1.46484		170.812	-2.38037
	170.898	-1.89209		170.906	-2.99072
	171	-1.46484		171	-2.44141
	171.098	-1.46484		171.125	-3.05176
	171.199	-1.83105		171.219	-2.2583
	171.301	-1.77002		171.312	-2.62451
	171.398	-1.95312		171.406	-2.92969
	171.5	-1.89209		171.5	-2.68555
	171.598	-1.95312		171.625	-3.05176
	171.699	-1.83105		171.719	-3.05176
	171.801	-1.83105		171.812	-2.50244
	171.898	-1.77002		171.906	-2.62451
	172	-2.2583		172	-2.86865
	172.098	-2.01416		172.125	-2.68555
	172.199	-2.0752		172.219	-2.56348
	172.301	-2.80762		172.312	-2.19727
	172.398	-2.68555		172.406	-2.2583
	172.5	-2.31934		172.5	-1.89209
	172.598	-1.95312		172.625	-2.01416
	172.699	-1.89209		172.719	-2.13623
	172.801	-1.46484		172.812	-2.01416
	172.898	-2.0752		172.906	-1.95312
	173	-1.40381		173	-1.34277
	173.098	-2.19727		173.125	-1.34277
	173.199	-2.01416		173.219	-0.79346
	173.301	-1.52588		173.312	-1.64795
	173.398	-1.89209		173.406	-1.46484
	173.5	-1.52588		173.5	-1.46484
	173.598	-1.70898		173.625	-1.83105
	173.699	-1.52588		173.719	-1.46484
	173.801	-1.77002		173.812	-2.01416
	173.898	-1.28174		173.906	-2.13623
	174	-1.77002		174	-2.44141
	174.098	-1.46484		174.125	-2.31934
	174.199	-1.70898		174.219	-2.38037
	174.301	-1.77002		174.312	-1.89209
	174.398	-1.34277		174.406	-1.95312
	174.5	-2.19727		174.5	-2.19727
	174.598	-2.19727		174.625	-1.95312
	174.699	-1.77002		174.719	-2.01416
	174.801	-1.83105		174.812	-1.58691
	174.898	-2.0752		174.906	-1.77002
	175	-1.64795		175	-1.40381
	175.098	-2.13623		175.125	-1.70898
	175.199	-2.0752		175.219	-1.46484
	175.301	-2.13623		175.312	-1.2207
	175.398	-2.01416		175.406	-1.58691
	175.5	-1.34277		175.5	-1.15967
	175.598	-1.83105		175.625	-1.95312
	175.699	-1.77002		175.719	-1.70898
	175.801	-1.28174		175.812	-2.0752
	175.898	-1.89209		175.906	-1.83105
	176	-1.95312		176	-2.2583
	176.098	-2.19727		176.125	-2.68555
	176.199	-1.89209		176.219	-2.31934
	176.301	-1.77002		176.312	-2.62451
	176.398	-1.34277		176.406	-2.2583
	176.5	-1.64795		176.5	-2.31934
	176.598	-1.15967		176.625	-1.70898
	176.699	-1.2207		176.719	-1.83105
	176.801	-1.09863		176.812	-1.83105
	176.898	-0.91553		176.906	-1.52588
	177	-0.79346		177	-1.70898
	177.098	-0.61035		177.125	-1.95312
	177.199	-0.91553		177.219	-2.13623
	177.301	-0.97656		177.312	-2.01416
	177.398	-1.0376		177.406	-2.0752
	177.5	-0.42725		177.5	-1.58691
	177.598	-0.79346		177.625	-1.77002
	177.699	-0.30518		177.719	-1.0376
	177.801	-0.79346		177.812	-1.40381
	177.898	-0.97656		177.906	-2.01416
	178	-0.73242		178	-1.64795
	178.098	-1.09863		178.125	-1.64795
	178.199	-1.0376		178.219	-1.52588
	178.301	-1.0376		178.312	-2.38037
	178.398	-1.40381		178.406	-1.77002
	178.5	-1.70898		178.5	-1.64795
	178.598	-1.58691		178.625	-1.46484
	178.699	-2.01416		178.719	-1.95312
	178.801	-2.01416		178.812	-1.52588
	178.898	-2.38037		178.906	-1.52588
	179	-2.62451		179	-1.83105
	179.098	-2.13623		179.125	-1.70898
	179.199	-2.74658		179.219	-1.64795
	179.301	-2.68555		179.312	-1.58691
	179.398	-2.56348		179.406	-2.01416
	179.5	-2.2583		179.5	-1.64795
	179.598	-2.86865		179.625	-2.19727
	179.699	-2.44141		179.719	-1.64795
	179.801	-2.50244		179.812	-1.77002
	179.898	-2.50244		179.906	-1.89209
	180	-2.2583		180	-0.91553
	180.098	-2.86865		180.125	-1.64795
	180.199	-2.31934		180.219	-0.91553
	180.301	-3.05176		180.312	-1.09863
	180.398	-3.17383		180.406	-0.91553
	180.5	-2.68555		180.5	-0.97656
	180.598	-2.19727		180.625	-0.85449
	180.699	-2.13623		180.719	-1.34277
	180.801	-2.44141		180.812	-1.2207
	180.898	-3.05176		180.906	-1.64795
	181	-3.05176		181	-1.64795
	181.098	-2.86865		181.125	-1.52588
	181.199	-2.74658		181.219	-1.77002
	181.301	-2.13623		181.312	-0.79346
	181.398	-2.13623		181.406	-1.0376
	181.5	-1.95312		181.5	-0.79346
	181.598	-1.58691		181.625	-1.34277
	181.699	-1.89209		181.719	-1.0376
	181.801	-1.40381		181.812	-1.58691
	181.898	-1.77002		181.906	-1.58691
	182	-1.70898		182	-1.34277
	182.098	-1.95312		182.125	-1.95312
	182.199	-2.01416		182.219	-1.2207
	182.301	-2.19727		182.312	-1.77002
	182.398	-1.95312		182.406	-1.89209
	182.5	-1.83105		182.5	-1.83105
	182.598	-2.38037		182.625	-2.13623
	182.699	-2.62451		182.719	-2.31934
	182.801	-2.62451		182.812	-2.01416
	182.898	-2.74658		182.906	-2.2583
	183	-2.68555		183	-2.31934
	183.098	-1.89209		183.125	-2.44141
	183.199	-2.13623		183.219	-2.74658
	183.301	-2.0752		183.312	-2.2583
	183.398	-2.38037		183.406	-2.99072
	183.5	-2.19727		183.5	-2.80762
	183.598	-2.01416		183.625	-2.62451
	183.699	-2.01416		183.719	-2.80762
	183.801	-1.95312		183.812	-2.86865
	183.898	-2.2583		183.906	-2.86865
	184	-2.38037		184	-2.68555
	184.098	-2.74658		184.125	-2.74658
	184.199	-2.31934		184.219	-2.38037
	184.301	-2.62451		184.312	-3.05176
	184.398	-2.80762		184.406	-2.50244
	184.5	-2.38037		184.5	-2.56348
	184.598	-2.44141		184.625	-2.74658
	184.699	-2.2583		184.719	-2.31934
	184.801	-2.38037		184.812	-2.74658
	184.898	-2.13623		184.906	-2.68555
	185	-2.31934		185	-2.80762
	185.098	-1.64795		185.125	-2.80762
	185.199	-1.89209		185.219	-2.80762
	185.301	-1.64795		185.312	-2.19727
	185.398	-1.70898		185.406	-2.80762
	185.5	-2.62451		185.5	-2.38037
	185.598	-2.44141		185.625	-2.2583
	185.699	-2.50244		185.719	-2.99072
	185.801	-1.95312		185.812	-2.50244
	185.898	-2.56348		185.906	-2.92969
	186	-2.31934		186	-2.13623
	186.098	-2.56348		186.125	-2.19727
	186.199	-1.95312		186.219	-2.2583
	186.301	-2.50244		186.312	-2.44141
	186.398	-2.19727		186.406	-2.38037
	186.5	-1.83105		186.5	-2.19727
	186.598	-2.2583		186.625	-2.44141
	186.699	-1.95312		186.719	-1.64795
	186.801	-2.44141		186.812	-2.50244
	186.898	-2.68555		186.906	-2.2583
	187	-2.92969		187	-2.50244
	187.098	-2.19727		187.125	-2.50244
	187.199	-2.56348		187.219	-2.13623
	187.301	-2.62451		187.312	-2.62451
	187.398	-2.99072		187.406	-2.56348
	187.5	-2.68555		187.5	-2.44141
	187.598	-2.31934		187.625	-2.19727
	187.699	-2.50244		187.719	-2.44141
	187.801	-2.0752		187.812	-1.83105
	187.898	-2.13623		187.906	-3.05176
	188	-2.38037		188	-2.44141
	188.098	-2.2583		188.125	-3.05176
	188.199	-2.38037		188.219	-2.19727
	188.301	-2.38037		188.312	-2.2583
	188.398	-2.2583		188.406	-2.56348
	188.5	-2.01416		188.5	-2.74658
	188.598	-2.13623		188.625	-2.2583
	188.699	-1.64795		188.719	-2.19727
	188.801	-1.95312		188.812	-2.50244
	188.898	-1.58691		188.906	-2.38037
	189	-1.64795		189	-2.0752
	189.098	-1.58691		189.125	-1.70898
	189.199	-1.28174		189.219	-2.2583
	189.301	-1.2207		189.312	-2.19727
	189.398	-1.2207		189.406	-2.0752
	189.5	-1.2207		189.5	-1.95312
	189.598	-0.91553		189.625	-1.95312
	189.699	-0.97656		189.719	-1.89209
	189.801	-0.30518		189.812	-1.95312
	189.898	-0.61035		189.906	-2.38037
	190	-0.67139		190	-1.89209
	190.098	-0.85449		190.125	-2.68555
	190.199	-1.52588		190.219	-2.80762
	190.301	-1.46484		190.312	-2.92969
	190.398	-1.58691		190.406	-3.60107
	190.5	-1.52588		190.5	-3.05176
	190.598	-1.40381		190.625	-3.78418
	190.699	-1.46484		190.719	-3.05176
	190.801	-1.46484		190.812	-3.35693
	190.898	-1.15967		190.906	-2.92969
	191	-1.46484		191	-3.17383
	191.098	-1.83105		191.125	-3.11279
	191.199	-1.52588		191.219	-3.05176
	191.301	-1.95312		191.312	-2.86865
	191.398	-1.46484		191.406	-3.05176
	191.5	-1.46484		191.5	-3.05176
	191.598	-1.28174		191.625	-2.92969
	191.699	-1.40381		191.719	-2.62451
	191.801	-1.2207		191.812	-2.44141
	191.898	-2.13623		191.906	-2.50244
	192	-1.70898		192	-1.77002
	192.098	-1.58691		192.125	-1.89209
	192.199	-1.64795		192.219	-1.95312
	192.301	-1.15967		192.312	-1.70898
	192.398	-1.89209		192.406	-1.83105
	192.5	-1.70898		192.5	-1.52588
	192.598	-1.34277		192.625	-1.83105
	192.699	-1.34277		192.719	-1.58691
	192.801	-1.46484		192.812	-1.77002
	192.898	-1.52588		192.906	-1.77002
	193	-1.15967		193	-1.83105
	193.098	-1.52588		193.125	-1.95312
	193.199	-1.64795		193.219	-1.77002
	193.301	-2.01416		193.312	-2.38037
	193.398	-1.2207		193.406	-2.13623
	193.5	-1.34277		193.5	-1.89209
	193.598	-1.46484		193.625	-1.95312
	193.699	-1.34277		193.719	-1.64795
	193.801	-1.46484		193.812	-1.52588
	193.898	-1.58691		193.906	-1.70898
	194	-1.95312		194	-2.01416
	194.098	-1.95312		194.125	-1.95312
	194.199	-2.44141		194.219	-1.95312
	194.301	-2.50244		194.312	-1.34277
	194.398	-2.50244		194.406	-1.58691
	194.5	-1.83105		194.5	-1.15967
	194.598	-2.13623		194.625	-1.77002
	194.699	-2.38037		194.719	-1.83105
	194.801	-1.95312		194.812	-2.01416
	194.898	-2.38037		194.906	-1.83105
	195	-1.89209		195	-1.83105
	195.098	-2.13623		195.125	-2.0752
	195.199	-2.0752		195.219	-1.52588
	195.301	-2.50244		195.312	-1.64795
	195.398	-2.2583		195.406	-1.52588
	195.5	-2.38037		195.5	-1.83105
	195.598	-1.64795		195.625	-1.28174
	195.699	-1.52588		195.719	-1.40381
	195.801	-1.70898		195.812	-1.64795
	195.898	-0.85449		195.906	-1.46484
	196	-1.09863		196	-1.77002
	196.098	-1.09863		196.125	-1.77002
	196.199	-1.52588		196.219	-1.77002
	196.301	-1.40381		196.312	-1.2207
	196.398	-1.77002		196.406	-1.95312
	196.5	-1.34277		196.5	-1.40381
	196.598	-1.70898		196.625	-2.13623
	196.699	-1.46484		196.719	-1.70898
	196.801	-1.58691		196.812	-1.89209
	196.898	-1.89209		196.906	-2.68555
	197	-1.28174		197	-1.89209
	197.098	-1.46484		197.125	-2.2583
	197.199	-1.34277		197.219	-1.95312
	197.301	-1.09863		197.312	-2.19727
	197.398	-1.15967		197.406	-1.64795
	197.5	-0.97656		197.5	-1.77002
	197.598	-1.09863		197.625	-1.09863
	197.699	-0.91553		197.719	-1.64795
	197.801	-0.79346		197.812	-2.19727
	197.898	-0.48828		197.906	-1.34277
	198	-1.15967		198	-1.40381
	198.098	-0.67139		198.125	-1.34277
	198.199	-1.28174		198.219	-1.58691
	198.301	-1.15967		198.312	-1.64795
	198.398	-1.95312		198.406	-1.83105
	198.5	-1.83105		198.5	-1.2207
	198.598	-1.64795		198.625	-2.2583
	198.699	-1.58691		198.719	-1.70898
	198.801	-1.58691		198.812	-1.77002
	198.898	-1.83105		198.906	-1.77002
	199	-1.64795		199	-1.09863
	199.098	-2.13623		199.125	-1.58691
	199.199	-1.64795		199.219	-1.34277
	199.301	-2.01416		199.312	-0.91553
	199.398	-2.13623		199.406	-1.0376
	199.5	-2.44141		199.5	-0.97656
[truncated: 48,005 more rows]

## Sheet: Figure 6 F ii
	Figure 6 F ii up						Figure 6 F ii bottom
	CMUS
	acsf			LA
	Time(ms)	Voltage (mv)		Time(ms)	Voltage (mv)		Time(min)	Firing rate(Hz)
	0	-0.07935		0	-0.10681		0.19	0.70175
	0.1	-0.07324		0.125	-0.11292		0.38	0.78947
	0.2	-0.03662		0.25	-0.0946		0.57	0.70175
	0.3	-0.05188		0.3125	-0.0824		0.76	0.78947
	0.4	-0.03357		0.4375	-0.08545		0.95	0.78947
	0.5	-0.03662		0.5	-0.10071		1.14	0.78947
	0.6	-0.04883		0.625	-0.14648		1.33	0.78947
	0.7	-0.04883		0.75	-0.14038		1.52	0.70175
	0.8	-0.04272		0.8125	-0.11597		1.71	0.70175
	0.9	-0.03967		0.9375	-0.10071		1.9	0.78947
	1	-0.03662		1	-0.08545		2.09	0.78947
	1.1	-0.05188		1.125	-0.07629		2.28	0.78947
	1.2	-0.05188		1.25	-0.12512		2.47	0.61404
	1.3	-0.04272		1.3125	-0.11292		2.66	0.78947
	1.4	-0.06714		1.4375	-0.11292		2.85	0.70175
	1.5	-0.05798		1.5	-0.13733		3.04	0.87719
	1.6	-0.07629		1.625	-0.12207		3.23	0.70175
	1.7	-0.07324		1.75	-0.12817		3.42	0.70175
	1.8	-0.07629		1.8125	-0.0824		3.61	0.78947
	1.9	-0.0885		1.9375	-0.10071		3.8	0.70175
	2	-0.0824		2	-0.09766		3.99	0.78947
	2.1	-0.09155		2.125	-0.10071		4.18	0.78947
	2.2	-0.08545		2.25	-0.12817		4.37	0.78947
	2.3	-0.0885		2.3125	-0.12817		4.56	0.78947
	2.4	-0.07019		2.4375	-0.12207		4.75	0.78947
	2.5	-0.0824		2.5	-0.11597		4.94	0.87719
	2.6	-0.04578		2.625	-0.14343		5.13	0.78947
	2.7	-0.07324		2.75	-0.11902		5.32	0.78947
	2.8	-0.07629		2.8125	-0.12512		5.51	0.78947
	2.9	-0.07019		2.9375	-0.10681		5.7	0.70175
	3	-0.10376		3	-0.10071		5.89	0.70175
	3.1	-0.13123		3.125	-0.10986		6.08	0.70175
	3.2	-0.11292		3.25	-0.10376		6.27	0.52632
	3.3	-0.10376		3.3125	-0.10681		6.46	0.70175
	3.4	-0.0824		3.4375	-0.11902		6.65	0.52632
	3.5	-0.09155		3.5	-0.09766		6.84	0.70175
	3.6	-0.12817		3.625	-0.10681		7.03	0.61404
	3.7	-0.11292		3.75	-0.13428		7.22	0.4386
	3.8	-0.11597		3.8125	-0.0946		7.41	0.61404
	3.9	-0.12207		3.9375	-0.13428		7.6	0.70175
	4	-0.0946		4	-0.14038		7.79	0.61404
	4.1	-0.13733		4.125	-0.13123		7.98	0.61404
	4.2	-0.13428		4.25	-0.15869		8.17	0.52632
	4.3	-0.12207		4.3125	-0.13733		8.36	0.61404
	4.4	-0.13123		4.4375	-0.15869		8.55	0.52632
	4.5	-0.14954		4.5	-0.10986		8.74	0.52632
	4.6	-0.12817		4.625	-0.12817		8.93	0.4386
	4.7	-0.14954		4.75	-0.14648		9.12	0.52632
	4.8	-0.16479		4.8125	-0.08545		9.31	0.52632
	4.9	-0.13123		4.9375	-0.10071		9.5	0.4386
	5	-0.14038		5	-0.09766		9.69	0.52632
	5.1	-0.10071		5.125	-0.10986		9.88	0.52632
	5.2	-0.12207		5.25	-0.11597		10.07	0.4386
	5.3	-0.08545		5.3125	-0.18005		10.26	0.4386
	5.4	-0.0885		5.4375	-0.12512		10.45	0.52632
	5.5	-0.11597		5.5	-0.11902		10.64	0.52632
	5.6	-0.11292		5.625	-0.10376		10.83	0.4386
	5.7	-0.11292		5.75	-0.11902		11.02	0.52632
	5.8	-0.12817		5.8125	-0.12512		11.21	0.61404
	5.9	-0.10681		5.9375	-0.10071		11.4	0.61404
	6	-0.10681		6	-0.12512		11.59	0.70175
	6.1	-0.14038		6.125	-0.11597		11.78	0.70175
	6.2	-0.10681		6.25	-0.15564		11.97	0.70175
	6.3	-0.11902		6.3125	-0.14038		12.16	0.61404
	6.4	-0.09155		6.4375	-0.17395		12.35	0.61404
	6.5	-0.10376		6.5	-0.13733		12.54	0.70175
	6.6	-0.12207		6.625	-0.12207		12.73	0.61404
	6.7	-0.10376		6.75	-0.11292		12.92	0.70175
	6.8	-0.11902		6.8125	-0.12817		13.11	0.52632
	6.9	-0.09766		6.9375	-0.16174		13.3	0.70175
	7	-0.11597		7	-0.14648		13.49	0.61404
	7.1	-0.11597		7.125	-0.14954		13.68	0.61404
	7.2	-0.11902		7.25	-0.15869		13.87	0.61404
	7.3	-0.10071		7.3125	-0.15259		14.06	0.70175
	7.4	-0.10376		7.4375	-0.14648		14.25	0.61404
	7.5	-0.0946		7.5	-0.16785		14.44	0.70175
	7.6	-0.0946		7.625	-0.15259		14.63	0.61404
	7.7	-0.12817		7.75	-0.13428		14.82	0.52632
	7.8	-0.10986		7.8125	-0.13733		15.01	0.52632
	7.9	-0.12207		7.9375	-0.14343		15.2	0.70175
	8	-0.13123		8	-0.14648		15.39	0.52632
	8.1	-0.14954		8.125	-0.12817		15.58	0.52632
	8.2	-0.12817		8.25	-0.13428		15.77	0.61404
	8.3	-0.11902		8.3125	-0.12512		15.96	0.61404
	8.4	-0.11597		8.4375	-0.11292		16.15	0.70175
	8.5	-0.14343		8.5	-0.10986		16.34	0.61404
	8.6	-0.13123		8.625	-0.12207		16.53	0.70175
	8.7	-0.12207		8.75	-0.11902		16.72	0.61404
	8.8	-0.14954		8.8125	-0.10681		16.91	0.70175
	8.9	-0.11597		8.9375	-0.10986		17.1	0.78947
	9	-0.13428		9	-0.11597		17.29	0.70175
	9.1	-0.14038		9.125	-0.11292		17.48	0.70175
	9.2	-0.11597		9.25	-0.0885		17.67	0.70175
	9.3	-0.0885		9.3125	-0.13733		17.86	0.78947
	9.4	-0.11597		9.4375	-0.11902		18.05	0.70175
	9.5	-0.11292		9.5	-0.10376		18.24	0.78947
	9.6	-0.11597		9.625	-0.07324		18.43	0.70175
	9.7	-0.12207		9.75	-0.0824		18.62	0.70175
	9.8	-0.11597		9.8125	-0.0885		18.81	0.87719
	9.9	-0.12512		9.9375	-0.06714		19	0.78947
	10	-0.13123		10	-0.0885
	10.1	-0.14343		10.125	-0.09155
	10.2	-0.14954		10.25	-0.11597
	10.3	-0.14343		10.3125	-0.09155
	10.4	-0.13428		10.4375	-0.12512
	10.5	-0.15564		10.5	-0.0946
	10.6	-0.15869		10.625	-0.10681
	10.7	-0.15869		10.75	-0.11597
	10.8	-0.13428		10.8125	-0.13123
	10.9	-0.15564		10.9375	-0.12207
	11	-0.14038		11	-0.11902
	11.1	-0.12817		11.125	-0.10376
	11.2	-0.15869		11.25	-0.07935
	11.3	-0.15259		11.3125	-0.05798
	11.4	-0.15259		11.4375	-0.07324
	11.5	-0.14954		11.5	-0.0824
	11.6	-0.14038		11.625	-0.0824
	11.7	-0.16174		11.75	-0.08545
	11.8	-0.14648		11.8125	-0.12207
	11.9	-0.14954		11.9375	-0.10986
	12	-0.13123		12	-0.11597
	12.1	-0.13123		12.125	-0.0885
	12.2	-0.11902		12.25	-0.0946
	12.3	-0.13428		12.3125	-0.09155
	12.4	-0.13733		12.4375	-0.11292
	12.5	-0.13123		12.5	-0.11597
	12.6	-0.13123		12.625	-0.14038
	12.7	-0.11902		12.75	-0.11902
	12.8	-0.14648		12.8125	-0.11597
	12.9	-0.10071		12.9375	-0.12512
	13	-0.10376		13	-0.0885
	13.1	-0.10986		13.125	-0.0885
	13.2	-0.0885		13.25	-0.06409
	13.3	-0.10071		13.3125	-0.0946
	13.4	-0.09155		13.4375	-0.09766
	13.5	-0.09766		13.5	-0.07629
	13.6	-0.07629		13.625	-0.10376
	13.7	-0.0824		13.75	-0.09766
	13.8	-0.06714		13.8125	-0.0885
	13.9	-0.09155		13.9375	-0.0824
	14	-0.0885		14	-0.09155
	14.1	-0.10376		14.125	-0.06104
	14.2	-0.10376		14.25	-0.09766
	14.3	-0.09766		14.3125	-0.0824
	14.4	-0.10986		14.4375	-0.06104
	14.5	-0.11292		14.5	-0.10376
	14.6	-0.0824		14.625	-0.06714
	14.7	-0.07629		14.75	-0.09766
	14.8	-0.07019		14.8125	-0.11597
	14.9	-0.04272		14.9375	-0.11597
	15	-0.07629		15	-0.0885
	15.1	-0.07324		15.125	-0.09766
	15.2	-0.0885		15.25	-0.06714
	15.3	-0.12512		15.3125	-0.09766
	15.4	-0.0946		15.4375	-0.10681
	15.5	-0.11902		15.5	-0.0885
	15.6	-0.0885		15.625	-0.09155
	15.7	-0.06714		15.75	-0.07324
	15.8	-0.07324		15.8125	-0.0824
	15.9	-0.07019		15.9375	-0.08545
	16	-0.07019		16	-0.04883
	16.1	-0.07935		16.125	-0.04272
	16.2	-0.0946		16.25	-0.06104
	16.3	-0.0946		16.3125	-0.05798
	16.4	-0.10376		16.4375	-0.04883
	16.5	-0.08545		16.5	-0.06714
	16.6	-0.10376		16.625	-0.04272
	16.7	-0.09155		16.75	-0.05798
	16.8	-0.09155		16.8125	-0.03052
	16.9	-0.09155		16.9375	-0.03052
	17	-0.0824		17	-0.03662
	17.1	-0.09766		17.125	-0.04272
	17.2	-0.09155		17.25	-0.07324
	17.3	-0.0885		17.3125	-0.04883
	17.4	-0.07629		17.4375	-0.07019
	17.5	-0.09155		17.5	-0.05188
	17.6	-0.06104		17.625	-0.06409
	17.7	-0.07629		17.75	-0.05493
	17.8	-0.07935		17.8125	-0.06714
	17.9	-0.07324		17.9375	-0.06104
	18	-0.08545		18	-0.07019
	18.1	-0.07324		18.125	-0.07629
	18.2	-0.07629		18.25	-0.0824
	18.3	-0.04883		18.3125	-0.09766
	18.4	-0.04578		18.4375	-0.08545
	18.5	-0.05493		18.5	-0.10986
	18.6	-0.06714		18.625	-0.08545
	18.7	-0.03357		18.75	-0.09155
	18.8	-0.09155		18.8125	-0.0824
	18.9	-0.0946		18.9375	-0.11292
	19	-0.07629		19	-0.10986
	19.1	-0.09766		19.125	-0.09766
	19.2	-0.09766		19.25	-0.10681
	19.3	-0.0946		19.3125	-0.09155
	19.4	-0.10071		19.4375	-0.10376
	19.5	-0.11292		19.5	-0.07324
	19.6	-0.0824		19.625	-0.09155
	19.7	-0.11902		19.75	-0.08545
	19.8	-0.10986		19.8125	-0.0946
	19.9	-0.10376		19.9375	-0.12512
	20	-0.07935		20	-0.15259
	20.1	-0.05188		20.125	-0.16479
	20.2	-0.05493		20.25	-0.12207
	20.3	-0.03967		20.3125	-0.10986
	20.4	-0.06714		20.4375	-0.0946
	20.5	-0.06714		20.5	-0.10071
	20.6	-0.06409		20.625	-0.0885
	20.7	-0.05188		20.75	-0.11902
	20.8	-0.04883		20.8125	-0.10071
	20.9	-0.08545		20.9375	-0.10376
	21	-0.06714		21	-0.10376
	21.1	-0.05493		21.125	-0.10071
	21.2	-0.04578		21.25	-0.13428
	21.3	-0.06409		21.3125	-0.10376
	21.4	-0.04883		21.4375	-0.10986
	21.5	-0.06409		21.5	-0.0885
	21.6	-0.06409		21.625	-0.10681
	21.7	-0.07324		21.75	-0.10071
	21.8	-0.09155		21.8125	-0.10986
	21.9	-0.0885		21.9375	-0.10986
	22	-0.10376		22	-0.09766
	22.1	-0.0885		22.125	-0.12817
	22.2	-0.09766		22.25	-0.10376
	22.3	-0.0885		22.3125	-0.13428
	22.4	-0.10986		22.4375	-0.10376
	22.5	-0.09766		22.5	-0.10986
	22.6	-0.09766		22.625	-0.09155
	22.7	-0.10071		22.75	-0.0885
	22.8	-0.07324		22.8125	-0.10376
	22.9	-0.10681		22.9375	-0.12207
	23	-0.0946		23	-0.12817
	23.1	-0.13123		23.125	-0.12512
	23.2	-0.11292		23.25	-0.14648
	23.3	-0.10986		23.3125	-0.11597
	23.4	-0.11292		23.4375	-0.12817
	23.5	-0.12207		23.5	-0.10071
	23.6	-0.14648		23.625	-0.0885
	23.7	-0.13123		23.75	-0.11597
	23.8	-0.12817		23.8125	-0.10376
	23.9	-0.13123		23.9375	-0.10071
	24	-0.14038		24	-0.11292
	24.1	-0.11902		24.125	-0.12207
	24.2	-0.12817		24.25	-0.12512
	24.3	-0.11597		24.3125	-0.11902
	24.4	-0.12512		24.4375	-0.11597
	24.5	-0.11597		24.5	-0.10681
	24.6	-0.10071		24.625	-0.0885
	24.7	-0.13123		24.75	-0.0946
	24.8	-0.14954		24.8125	-0.10986
	24.9	-0.14954		24.9375	-0.0824
	25	-0.14648		25	-0.11902
	25.1	-0.15869		25.125	-0.12512
	25.2	-0.0946		25.25	-0.10681
	25.3	-0.11292		25.3125	-0.11597
	25.4	-0.11902		25.4375	-0.11902
	25.5	-0.11597		25.5	-0.0885
	25.6	-0.13428		25.625	-0.10986
	25.7	-0.11902		25.75	-0.12817
	25.8	-0.12207		25.8125	-0.10071
	25.9	-0.13733		25.9375	-0.15259
	26	-0.11597		26	-0.11902
	26.1	-0.11597		26.125	-0.12512
	26.2	-0.11902		26.25	-0.11597
	26.3	-0.10986		26.3125	-0.12512
	26.4	-0.13428		26.4375	-0.12817
	26.5	-0.14954		26.5	-0.15869
	26.6	-0.13428		26.625	-0.14343
	26.7	-0.14648		26.75	-0.18311
	26.8	-0.10986		26.8125	-0.18005
	26.9	-0.12817		26.9375	-0.17395
	27	-0.13123		27	-0.18921
	27.1	-0.12817		27.125	-0.15869
	27.2	-0.14954		27.25	-0.16174
	27.3	-0.13123		27.3125	-0.1709
	27.4	-0.09766		27.4375	-0.18311
	27.5	-0.10681		27.5	-0.18005
	27.6	-0.09766		27.625	-0.16785
	27.7	-0.0824		27.75	-0.15564
	27.8	-0.0885		27.8125	-0.14038
	27.9	-0.07935		27.9375	-0.13123
	28	-0.07324		28	-0.12207
	28.1	-0.06714		28.125	-0.13428
	28.2	-0.07935		28.25	-0.10071
	28.3	-0.09766		28.3125	-0.11597
	28.4	-0.0946		28.4375	-0.12207
	28.5	-0.10986		28.5	-0.13428
	28.6	-0.14343		28.625	-0.12512
	28.7	-0.13123		28.75	-0.10986
	28.8	-0.0946		28.8125	-0.13123
	28.9	-0.11597		28.9375	-0.14343
	29	-0.10681		29	-0.13733
	29.1	-0.10986		29.125	-0.10071
	29.2	-0.13428		29.25	-0.12817
	29.3	-0.11902		29.3125	-0.11292
	29.4	-0.10681		29.4375	-0.12817
	29.5	-0.0824		29.5	-0.12207
	29.6	-0.0946		29.625	-0.09155
	29.7	-0.0885		29.75	-0.07629
	29.8	-0.09155		29.8125	-0.06104
	29.9	-0.12207		29.9375	-0.07324
	30	-0.14954		30	-0.07629
	30.1	-0.12817		30.125	-0.10071
	30.2	-0.10376		30.25	-0.10376
	30.3	-0.11597		30.3125	-0.12512
	30.4	-0.08545		30.4375	-0.14648
	30.5	-0.11292		30.5	-0.09155
	30.6	-0.10071		30.625	-0.10681
	30.7	-0.09766		30.75	-0.0885
	30.8	-0.10071		30.8125	-0.07935
	30.9	-0.0885		30.9375	-0.06409
	31	-0.10376		31	-0.0946
	31.1	-0.10681		31.125	-0.06714
	31.2	-0.11902		31.25	-0.07019
	31.3	-0.11292		31.3125	-0.07935
	31.4	-0.13123		31.4375	-0.0824
	31.5	-0.13428		31.5	-0.11292
	31.6	-0.14648		31.625	-0.0946
	31.7	-0.12817		31.75	-0.09766
	31.8	-0.11902		31.8125	-0.10376
	31.9	-0.13428		31.9375	-0.10681
	32	-0.11902		32	-0.07629
	32.1	-0.12817		32.125	-0.07324
	32.2	-0.11597		32.25	-0.07629
	32.3	-0.10986		32.3125	-0.09155
	32.4	-0.10681		32.4375	-0.10376
	32.5	-0.12817		32.5	-0.07019
	32.6	-0.13123		32.625	-0.0824
	32.7	-0.13123		32.75	-0.07019
	32.8	-0.0885		32.8125	-0.11902
	32.9	-0.09155		32.9375	-0.10071
	33	-0.10681		33	-0.10681
	33.1	-0.09766		33.125	-0.0885
	33.2	-0.11902		33.25	-0.09766
	33.3	-0.0824		33.3125	-0.10376
	33.4	-0.09155		33.4375	-0.0885
	33.5	-0.0885		33.5	-0.10681
	33.6	-0.08545		33.625	-0.07019
	33.7	-0.07019		33.75	-0.0946
	33.8	-0.06714		33.8125	-0.07324
	33.9	-0.0885		33.9375	-0.0946
	34	-0.07629		34	-0.10376
	34.1	-0.0824		34.125	-0.07935
	34.2	-0.06714		34.25	-0.06409
	34.3	-0.07324		34.3125	-0.07935
	34.4	-0.05493		34.4375	-0.10681
	34.5	-0.06409		34.5	-0.07629
	34.6	-0.05493		34.625	-0.08545
	34.7	-0.04883		34.75	-0.05798
	34.8	-0.03662		34.8125	-0.08545
	34.9	-0.03052		34.9375	-0.07935
	35	-0.04883		35	-0.0824
	35.1	-0.06714		35.125	-0.0824
	35.2	-0.0885		35.25	-0.07629
	35.3	-0.07019		35.3125	-0.07019
	35.4	-0.07935		35.4375	-0.06409
	35.5	-0.04272		35.5	-0.07935
	35.6	-0.07935		35.625	-0.07629
	35.7	-0.0824		35.75	-0.07324
	35.8	-0.07019		35.8125	-0.06409
	35.9	-0.09766		35.9375	-0.06104
	36	-0.0824		36	-0.05493
	36.1	-0.11292		36.125	-0.05493
	36.2	-0.10376		36.25	-0.0946
	36.3	-0.09155		36.3125	-0.06714
	36.4	-0.10071		36.4375	-0.06104
	36.5	-0.12817		36.5	-0.0824
	36.6	-0.0946		36.625	-0.05188
	36.7	-0.10071		36.75	-0.07324
	36.8	-0.10071		36.8125	-0.06714
	36.9	-0.07324		36.9375	-0.04272
	37	-0.10071		37	-0.04578
	37.1	-0.06714		37.125	-0.07019
	37.2	-0.0824		37.25	-0.05493
	37.3	-0.07324		37.3125	-0.08545
	37.4	-0.06714		37.4375	-0.03662
	37.5	-0.07019		37.5	-0.06104
	37.6	-0.0824		37.625	-0.07629
	37.7	-0.07019		37.75	-0.05188
	37.8	-0.06409		37.8125	-0.06104
	37.9	-0.07629		37.9375	-0.05188
	38	-0.05188		38	-0.06104
	38.1	-0.07629		38.125	-0.06409
	38.2	-0.04883		38.25	-0.07019
	38.3	-0.06714		38.3125	-0.05188
	38.4	-0.05798		38.4375	-0.09155
	38.5	-0.04272		38.5	-0.10071
	38.6	-0.06104		38.625	-0.0824
	38.7	-0.09155		38.75	-0.10071
	38.8	-0.09766		38.8125	-0.0824
	38.9	-0.10681		38.9375	-0.11597
	39	-0.11292		39	-0.0885
	39.1	-0.07019		39.125	-0.07935
	39.2	-0.0824		39.25	-0.0885
	39.3	-0.10071		39.3125	-0.10376
	39.4	-0.09155		39.4375	-0.10376
	39.5	-0.0824		39.5	-0.10986
	39.6	-0.07629		39.625	-0.10071
	39.7	-0.12207		39.75	-0.11902
	39.8	-0.11292		39.8125	-0.13733
	39.9	-0.09766		39.9375	-0.12817
	40	-0.11597		40	-0.15259
	40.1	-0.10986		40.125	-0.13733
	40.2	-0.0885		40.25	-0.0885
	40.3	-0.10681		40.3125	-0.07019
	40.4	-0.08545		40.4375	-0.07324
	40.5	-0.07629		40.5	-0.07019
	40.6	-0.08545		40.625	-0.0946
	40.7	-0.06714		40.75	-0.09766
	40.8	-0.08545		40.8125	-0.12207
	40.9	-0.05798		40.9375	-0.12817
	41	-0.03967		41	-0.06104
	41.1	-0.05493		41.125	-0.0824
	41.2	-0.05188		41.25	-0.09155
	41.3	-0.05188		41.3125	-0.11597
	41.4	-0.05188		41.4375	-0.10986
	41.5	-0.06409		41.5	-0.10376
	41.6	-0.05798		41.625	-0.10376
	41.7	-0.05493		41.75	-0.09766
	41.8	-0.04883		41.8125	-0.09766
	41.9	-0.05798		41.9375	-0.05798
	42	-0.06104		42	-0.10376
	42.1	-0.07629		42.125	-0.11902
	42.2	-0.07324		42.25	-0.13123
	42.3	-0.07935		42.3125	-0.11902
	42.4	-0.07629		42.4375	-0.12207
	42.5	-0.07629		42.5	-0.11902
	42.6	-0.0885		42.625	-0.10986
	42.7	-0.06714		42.75	-0.12207
	42.8	-0.09155		42.8125	-0.09155
	42.9	-0.07629		42.9375	-0.08545
	43	-0.09155		43	-0.0885
	43.1	-0.0946		43.125	-0.11597
	43.2	-0.12207		43.25	-0.09155
	43.3	-0.13733		43.3125	-0.11292
	43.4	-0.10071		43.4375	-0.10681
	43.5	-0.11902		43.5	-0.13428
	43.6	-0.11597		43.625	-0.11292
	43.7	-0.14038		43.75	-0.11902
	43.8	-0.15564		43.8125	-0.12207
	43.9	-0.16174		43.9375	-0.13733
	44	-0.16479		44	-0.13123
	44.1	-0.14954		44.125	-0.13733
	44.2	-0.14648		44.25	-0.15869
	44.3	-0.12817		44.3125	-0.13428
	44.4	-0.11902		44.4375	-0.12207
	44.5	-0.14343		44.5	-0.09766
	44.6	-0.14954		44.625	-0.10681
	44.7	-0.15869		44.75	-0.11292
	44.8	-0.14038		44.8125	-0.10681
	44.9	-0.11597		44.9375	-0.12512
	45	-0.14038		45	-0.11292
	45.1	-0.12207		45.125	-0.11292
	45.2	-0.10681		45.25	-0.08545
	45.3	-0.11902		45.3125	-0.07935
	45.4	-0.11902		45.4375	-0.13428
	45.5	-0.13428		45.5	-0.12512
	45.6	-0.11597		45.625	-0.10986
	45.7	-0.15259		45.75	-0.10071
	45.8	-0.12512		45.8125	-0.13733
	45.9	-0.10681		45.9375	-0.12817
	46	-0.12207		46	-0.13733
	46.1	-0.12817		46.125	-0.10071
	46.2	-0.11597		46.25	-0.12207
	46.3	-0.0885		46.3125	-0.13123
	46.4	-0.10681		46.4375	-0.11292
	46.5	-0.09766		46.5	-0.14954
	46.6	-0.09155		46.625	-0.11902
	46.7	-0.0946		46.75	-0.15869
	46.8	-0.10986		46.8125	-0.14954
	46.9	-0.0946		46.9375	-0.14343
	47	-0.08545		47	-0.10986
	47.1	-0.0946		47.125	-0.12512
	47.2	-0.07629		47.25	-0.10681
	47.3	-0.11902		47.3125	-0.13123
	47.4	-0.11292		47.4375	-0.15564
	47.5	-0.13733		47.5	-0.12207
	47.6	-0.11902		47.625	-0.14648
	47.7	-0.12207		47.75	-0.13123
	47.8	-0.12207		47.8125	-0.14343
	47.9	-0.11597		47.9375	-0.13123
	48	-0.12512		48	-0.12512
	48.1	-0.13428		48.125	-0.13428
	48.2	-0.13733		48.25	-0.12512
	48.3	-0.09766		48.3125	-0.11292
	48.4	-0.14954		48.4375	-0.13123
	48.5	-0.13428		48.5	-0.14343
	48.6	-0.10986		48.625	-0.08545
	48.7	-0.10071		48.75	-0.11902
	48.8	-0.09766		48.8125	-0.0946
	48.9	-0.11597		48.9375	-0.11292
	49	-0.12512		49	-0.11902
	49.1	-0.11597		49.125	-0.10071
	49.2	-0.08545		49.25	-0.10681
	49.3	-0.10986		49.3125	-0.07324
	49.4	-0.0824		49.4375	-0.0824
	49.5	-0.0824		49.5	-0.07019
	49.6	-0.06714		49.625	-0.10071
	49.7	-0.10376		49.75	-0.09155
	49.8	-0.13123		49.8125	-0.0885
	49.9	-0.0885		49.9375	-0.06409
	50	-0.11292		50	-0.06104
	50.1	-0.11292		50.125	-0.11597
	50.2	-0.11597		50.25	-0.10681
	50.3	-0.11292		50.3125	-0.13123
	50.4	-0.12512		50.4375	-0.10376
	50.5	-0.10681		50.5	-0.10986
	50.6	-0.12207		50.625	-0.09766
	50.7	-0.14038		50.75	-0.0885
	50.8	-0.12817		50.8125	-0.06714
	50.9	-0.15869		50.9375	-0.0824
	51	-0.13428		51	-0.09766
	51.1	-0.16785		51.125	-0.09766
	51.2	-0.15259		51.25	-0.12817
	51.3	-0.14343		51.3125	-0.10376
	51.4	-0.13733		51.4375	-0.10071
	51.5	-0.14343		51.5	-0.0946
	51.6	-0.13733		51.625	-0.10071
	51.7	-0.14343		51.75	-0.11902
	51.8	-0.15259		51.8125	-0.11292
	51.9	-0.13428		51.9375	-0.09155
	52	-0.14954		52	-0.11292
	52.1	-0.14038		52.125	-0.10681
	52.2	-0.14954		52.25	-0.07629
	52.3	-0.13733		52.3125	-0.11902
	52.4	-0.10376		52.4375	-0.10376
	52.5	-0.10071		52.5	-0.10986
	52.6	-0.10986		52.625	-0.06714
	52.7	-0.10681		52.75	-0.09766
	52.8	-0.10376		52.8125	-0.09766
	52.9	-0.09766		52.9375	-0.10071
	53	-0.10681		53	-0.11597
	53.1	-0.11292		53.125	-0.10986
	53.2	-0.10376		53.25	-0.11597
	53.3	-0.10071		53.3125	-0.10071
	53.4	-0.06714		53.4375	-0.10071
	53.5	-0.07935		53.5	-0.0824
	53.6	-0.0824		53.625	-0.0885
	53.7	-0.05798		53.75	-0.09155
	53.8	-0.06714		53.8125	-0.0946
	53.9	-0.04578		53.9375	-0.10071
	54	-0.06409		54	-0.07324
	54.1	-0.05493		54.125	-0.10376
	54.2	-0.0824		54.25	-0.06104
	54.3	-0.07629		54.3125	-0.04883
	54.4	-0.0946		54.4375	-0.06714
	54.5	-0.11902		54.5	-0.0824
	54.6	-0.09766		54.625	-0.06714
	54.7	-0.07629		54.75	-0.07935
	54.8	-0.07935		54.8125	-0.10071
	54.9	-0.08545		54.9375	-0.09155
	55	-0.07324		55	-0.10986
	55.1	-0.0824		55.125	-0.09155
	55.2	-0.07019		55.25	-0.11597
	55.3	-0.10376		55.3125	-0.11292
	55.4	-0.10376		55.4375	-0.11292
	55.5	-0.10376		55.5	-0.07019
	55.6	-0.09766		55.625	-0.07935
	55.7	-0.07324		55.75	-0.10681
	55.8	-0.10376		55.8125	-0.09155
	55.9	-0.08545		55.9375	-0.08545
	56	-0.0946		56	-0.07019
	56.1	-0.07324		56.125	-0.0885
	56.2	-0.07019		56.25	-0.07935
	56.3	-0.07935		56.3125	-0.07629
	56.4	-0.07935		56.4375	-0.04272
	56.5	-0.10071		56.5	-0.05188
	56.6	-0.07935		56.625	-0.05798
	56.7	-0.0824		56.75	-0.02441
	56.8	-0.0824		56.8125	-0.04883
	56.9	-0.08545		56.9375	-0.04578
	57	-0.06104		57	-0.06104
	57.1	-0.07019		57.125	-0.05798
	57.2	-0.06104		57.25	-0.05493
	57.3	-0.07935		57.3125	-0.06104
	57.4	-0.08545		57.4375	-0.06714
	57.5	-0.07019		57.5	-0.05188
	57.6	-0.0946		57.625	-0.05493
	57.7	-0.05493		57.75	-0.07629
	57.8	-0.0946		57.8125	-0.03357
	57.9	-0.07324		57.9375	-0.07324
	58	-0.06409		58	-0.07019
	58.1	-0.06714		58.125	-0.07935
	58.2	-0.09766		58.25	-0.08545
	58.3	-0.08545		58.3125	-0.07935
	58.4	-0.04272		58.4375	-0.0824
	58.5	-0.09155		58.5	-0.08545
	58.6	-0.07019		58.625	-0.06714
	58.7	-0.09155		58.75	-0.07324
	58.8	-0.07935		58.8125	-0.10681
	58.9	-0.06409		58.9375	-0.0946
	59	-0.07019		59	-0.09766
	59.1	-0.08545		59.125	-0.08545
	59.2	-0.10071		59.25	-0.09766
	59.3	-0.09155		59.3125	-0.10376
	59.4	-0.10986		59.4375	-0.09766
	59.5	-0.0885		59.5	-0.11292
	59.6	-0.12207		59.625	-0.11292
	59.7	-0.10071		59.75	-0.13123
	59.8	-0.11902		59.8125	-0.13428
	59.9	-0.11902		59.9375	-0.14954
	60	-0.10071		60	-0.12817
	60.1	-0.10071		60.125	-0.15869
	60.2	-0.09766		60.25	-0.11597
	60.3	-0.10376		60.3125	-0.09155
	60.4	-0.07324		60.4375	-0.10376
	60.5	-0.07324		60.5	-0.10986
	60.6	-0.07324		60.625	-0.13123
	60.7	-0.06714		60.75	-0.12817
	60.8	-0.05188		60.8125	-0.10071
	60.9	-0.06409		60.9375	-0.09155
	61	-0.02441		61	-0.12817
	61.1	-0.01526		61.125	-0.09766
	61.2	-0.04578		61.25	-0.10986
	61.3	-0.02136		61.3125	-0.09155
	61.4	-0.04272		61.4375	-0.08545
	61.5	-0.03967		61.5	-0.14343
	61.6	-0.04883		61.625	-0.10376
	61.7	-0.04578		61.75	-0.10071
	61.8	-0.04883		61.8125	-0.10071
	61.9	-0.02136		61.9375	-0.0946
	62	-0.04272		62	-0.07019
	62.1	-0.05188		62.125	-0.07935
	62.2	-0.04578		62.25	-0.0824
	62.3	-0.0824		62.3125	-0.10681
	62.4	-0.05188		62.4375	-0.0946
	62.5	-0.08545		62.5	-0.09155
	62.6	-0.08545		62.625	-0.12512
	62.7	-0.06714		62.75	-0.10681
	62.8	-0.05188		62.8125	-0.12512
	62.9	-0.0824		62.9375	-0.11292
	63	-0.07935		63	-0.11597
	63.1	-0.09766		63.125	-0.10986
	63.2	-0.11597		63.25	-0.11597
	63.3	-0.09155		63.3125	-0.12207
	63.4	-0.10986		63.4375	-0.12512
	63.5	-0.07324		63.5	-0.12207
	63.6	-0.10681		63.625	-0.09155
	63.7	-0.10986		63.75	-0.11902
	63.8	-0.09155		63.8125	-0.11597
	63.9	-0.11902		63.9375	-0.13428
	64	-0.12512		64	-0.10986
	64.1	-0.14648		64.125	-0.10376
	64.2	-0.14343		64.25	-0.11597
	64.3	-0.15869		64.3125	-0.14343
	64.4	-0.12512		64.4375	-0.14648
	64.5	-0.12512		64.5	-0.14343
	64.6	-0.10681		64.625	-0.12207
	64.7	-0.12817		64.75	-0.07324
	64.8	-0.0885		64.8125	-0.09155
	64.9	-0.10986		64.9375	-0.08545
	65	-0.14038		65	-0.08545
	65.1	-0.10681		65.125	-0.10071
	65.2	-0.12512		65.25	-0.10986
	65.3	-0.11902		65.3125	-0.10681
	65.4	-0.13733		65.4375	-0.0824
	65.5	-0.13428		65.5	-0.12207
	65.6	-0.13123		65.625	-0.10986
	65.7	-0.12207		65.75	-0.0946
	65.8	-0.12207		65.8125	-0.0885
	65.9	-0.14343		65.9375	-0.11292
	66	-0.10071		66	-0.11902
	66.1	-0.11292		66.125	-0.12512
	66.2	-0.10986		66.25	-0.14648
	66.3	-0.13123		66.3125	-0.12512
	66.4	-0.12207		66.4375	-0.13123
	66.5	-0.11597		66.5	-0.12207
	66.6	-0.0946		66.625	-0.16174
	66.7	-0.12817		66.75	-0.14954
	66.8	-0.11597		66.8125	-0.14648
	66.9	-0.0946		66.9375	-0.16174
	67	-0.12512		67	-0.15259
	67.1	-0.09766		67.125	-0.16174
	67.2	-0.10986		67.25	-0.13733
	67.3	-0.12512		67.3125	-0.15564
	67.4	-0.12512		67.4375	-0.12512
	67.5	-0.12512		67.5	-0.15869
	67.6	-0.12207		67.625	-0.14343
	67.7	-0.12207		67.75	-0.1709
	67.8	-0.10986		67.8125	-0.13733
	67.9	-0.12207		67.9375	-0.14343
	68	-0.12207		68	-0.16479
	68.1	-0.11292		68.125	-0.12207
	68.2	-0.13428		68.25	-0.14648
	68.3	-0.14038		68.3125	-0.13733
	68.4	-0.11292		68.4375	-0.13733
	68.5	-0.13428		68.5	-0.10986
	68.6	-0.14954		68.625	-0.11292
	68.7	-0.12207		68.75	-0.0946
	68.8	-0.13428		68.8125	-0.10376
	68.9	-0.11902		68.9375	-0.10986
	69	-0.11902		69	-0.11902
	69.1	-0.10376		69.125	-0.14343
	69.2	-0.11597		69.25	-0.10071
	69.3	-0.12512		69.3125	-0.12817
	69.4	-0.10071		69.4375	-0.10986
	69.5	-0.11292		69.5	-0.10376
	69.6	-0.09766		69.625	-0.08545
	69.7	-0.07935		69.75	-0.08545
	69.8	-0.11597		69.8125	-0.10071
	69.9	-0.12207		69.9375	-0.10681
	70	-0.10681		70	-0.07629
	70.1	-0.11292		70.125	-0.0885
	70.2	-0.11292		70.25	-0.10376
	70.3	-0.0885		70.3125	-0.07935
	70.4	-0.11902		70.4375	-0.10376
	70.5	-0.11902		70.5	-0.0946
	70.6	-0.14038		70.625	-0.10071
	70.7	-0.14343		70.75	-0.0885
	70.8	-0.16174		70.8125	-0.06104
	70.9	-0.14954		70.9375	-0.10681
	71	-0.18005		71	-0.10376
	71.1	-0.15259		71.125	-0.09155
	71.2	-0.14343		71.25	-0.07019
	71.3	-0.14038		71.3125	-0.09155
	71.4	-0.12512		71.4375	-0.0824
	71.5	-0.16174		71.5	-0.0946
	71.6	-0.15259		71.625	-0.0824
	71.7	-0.15564		71.75	-0.07629
	71.8	-0.14343		71.8125	-0.11597
	71.9	-0.13123		71.9375	-0.07019
	72	-0.11902		72	-0.07935
	72.1	-0.12512		72.125	-0.07324
	72.2	-0.11902		72.25	-0.07324
	72.3	-0.13733		72.3125	-0.06409
	72.4	-0.12817		72.4375	-0.10376
	72.5	-0.11597		72.5	-0.11292
	72.6	-0.12817		72.625	-0.12512
	72.7	-0.11902		72.75	-0.14038
	72.8	-0.11292		72.8125	-0.0946
	72.9	-0.0946		72.9375	-0.11597
	73	-0.10376		73	-0.0946
	73.1	-0.08545		73.125	-0.11597
	73.2	-0.09766		73.25	-0.10071
	73.3	-0.07019		73.3125	-0.07629
	73.4	-0.10986		73.4375	-0.10376
	73.5	-0.12207		73.5	-0.10681
	73.6	-0.0946		73.625	-0.09766
	73.7	-0.12207		73.75	-0.08545
	73.8	-0.07324		73.8125	-0.10986
	73.9	-0.07019		73.9375	-0.0885
	74	-0.06714		74	-0.0946
	74.1	-0.05798		74.125	-0.10376
	74.2	-0.07019		74.25	-0.0946
	74.3	-0.05798		74.3125	-0.0824
	74.4	-0.0824		74.4375	-0.0885
	74.5	-0.0946		74.5	-0.12817
	74.6	-0.12817		74.625	-0.10986
	74.7	-0.09155		74.75	-0.11597
	74.8	-0.08545		74.8125	-0.07935
	74.9	-0.07324		74.9375	-0.06714
	75	-0.08545		75	-0.05188
	75.1	-0.10376		75.125	-0.08545
	75.2	-0.09155		75.25	-0.0824
	75.3	-0.07935		75.3125	-0.11597
	75.4	-0.07019		75.4375	-0.11292
	75.5	-0.07629		75.5	-0.07324
	75.6	-0.07019		75.625	-0.06714
	75.7	-0.10071		75.75	-0.04272
	75.8	-0.06104		75.8125	-0.08545
	75.9	-0.07935		75.9375	-0.07324
	76	-0.07935		76	-0.0885
	76.1	-0.06714		76.125	-0.06104
	76.2	-0.07629		76.25	-0.07019
	76.3	-0.05798		76.3125	-0.06104
	76.4	-0.08545		76.4375	-0.06714
	76.5	-0.0946		76.5	-0.08545
	76.6	-0.10376		76.625	-0.0885
	76.7	-0.11902		76.75	-0.07019
	76.8	-0.12207		76.8125	-0.05798
	76.9	-0.11902		76.9375	-0.05798
	77	-0.13123		77	-0.04272
	77.1	-0.12207		77.125	-0.06104
	77.2	-0.13428		77.25	-0.03357
	77.3	-0.14343		77.3125	-0.06714
	77.4	-0.11902		77.4375	-0.07629
	77.5	-0.10681		77.5	-0.08545
	77.6	-0.10071		77.625	-0.06104
	77.7	-0.0824		77.75	-0.0824
	77.8	-0.07019		77.8125	-0.05188
	77.9	-0.10986		77.9375	-0.02441
	78	-0.10681		78	-0.05493
	78.1	-0.08545		78.125	-0.06714
	78.2	-0.10681		78.25	-0.07019
	78.3	-0.08545		78.3125	-0.10071
	78.4	-0.11597		78.4375	-0.10071
	78.5	-0.10376		78.5	-0.11292
	78.6	-0.11292		78.625	-0.09155
	78.7	-0.07629		78.75	-0.08545
	78.8	-0.07324		78.8125	-0.0824
	78.9	-0.07629		78.9375	-0.09155
	79	-0.0885		79	-0.06714
	79.1	-0.10071		79.125	-0.09155
	79.2	-0.0946		79.25	-0.09155
	79.3	-0.12207		79.3125	-0.09155
	79.4	-0.09766		79.4375	-0.10986
	79.5	-0.13428		79.5	-0.09155
	79.6	-0.13428		79.625	-0.10681
	79.7	-0.10376		79.75	-0.09155
	79.8	-0.08545		79.8125	-0.0885
	79.9	-0.10071		79.9375	-0.09155
	80	-0.11292		80	-0.13123
	80.1	-0.0946		80.125	-0.12817
	80.2	-0.10376		80.25	-0.11597
	80.3	-0.07935		80.3125	-0.0885
	80.4	-0.07324		80.4375	-0.0824
	80.5	-0.03662		80.5	-0.11597
	80.6	-0.05188		80.625	-0.0824
	80.7	-0.05188		80.75	-0.0885
	80.8	-0.03967		80.8125	-0.07629
	80.9	-0.03662		80.9375	-0.05188
	81	-0.03357		81	-0.05188
	81.1	-0.04578		81.125	-0.07324
	81.2	-0.04883		81.25	-0.12512
	81.3	-0.07629		81.3125	-0.12512
	81.4	-0.06714		81.4375	-0.12512
	81.5	-0.07935		81.5	-0.11597
	81.6	-0.06409		81.625	-0.11292
	81.7	-0.05188		81.75	-0.09155
	81.8	-0.07324		81.8125	-0.11292
	81.9	-0.06104		81.9375	-0.11597
	82	-0.06714		82	-0.08545
	82.1	-0.04578		82.125	-0.10071
	82.2	-0.06409		82.25	-0.0824
	82.3	-0.05188		82.3125	-0.13123
	82.4	-0.07019		82.4375	-0.12512
	82.5	-0.07019		82.5	-0.10681
	82.6	-0.0946		82.625	-0.10376
	82.7	-0.10986		82.75	-0.11902
	82.8	-0.0824		82.8125	-0.07629
	82.9	-0.0885		82.9375	-0.10376
	83	-0.09155		83	-0.10376
	83.1	-0.09766		83.125	-0.0824
	83.2	-0.08545		83.25	-0.11902
	83.3	-0.0946		83.3125	-0.10071
	83.4	-0.0885		83.4375	-0.11292
	83.5	-0.12207		83.5	-0.13123
	83.6	-0.11902		83.625	-0.11597
	83.7	-0.13428		83.75	-0.10376
	83.8	-0.15869		83.8125	-0.10681
	83.9	-0.11902		83.9375	-0.11597
	84	-0.16479		84	-0.12207
	84.1	-0.14343		84.125	-0.14038
	84.2	-0.14954		84.25	-0.0946
	84.3	-0.14343		84.3125	-0.13733
	84.4	-0.14038		84.4375	-0.11902
	84.5	-0.14343		84.5	-0.11902
	84.6	-0.14954		84.625	-0.11902
	84.7	-0.14648		84.75	-0.12512
	84.8	-0.14343		84.8125	-0.12207
	84.9	-0.14343		84.9375	-0.13733
	85	-0.10986		85	-0.14038
	85.1	-0.13733		85.125	-0.09766
	85.2	-0.12817		85.25	-0.11902
	85.3	-0.0946		85.3125	-0.10376
	85.4	-0.07935		85.4375	-0.11597
	85.5	-0.07935		85.5	-0.09155
	85.6	-0.0824		85.625	-0.10681
	85.7	-0.09155		85.75	-0.11597
	85.8	-0.0946		85.8125	-0.0946
	85.9	-0.0885		85.9375	-0.0885
	86	-0.12207		86	-0.0946
	86.1	-0.0946		86.125	-0.12817
	86.2	-0.12207		86.25	-0.11597
	86.3	-0.10071		86.3125	-0.12512
	86.4	-0.10986		86.4375	-0.12512
	86.5	-0.12817		86.5	-0.15259
	86.6	-0.13428		86.625	-0.16785
	86.7	-0.12512		86.75	-0.18005
	86.8	-0.09766		86.8125	-0.18921
	86.9	-0.0946		86.9375	-0.14648
	87	-0.07629		87	-0.15564
	87.1	-0.09766		87.125	-0.15564
	87.2	-0.07019		87.25	-0.1709
	87.3	-0.0946		87.3125	-0.15869
	87.4	-0.10376		87.4375	-0.14954
	87.5	-0.09766		87.5	-0.14343
	87.6	-0.11597		87.625	-0.15259
	87.7	-0.0824		87.75	-0.14038
	87.8	-0.0946		87.8125	-0.12817
	87.9	-0.07629		87.9375	-0.15869
	88	-0.09766		88	-0.12817
	88.1	-0.10071		88.125	-0.14038
	88.2	-0.0946		88.25	-0.13123
	88.3	-0.0885		88.3125	-0.13733
	88.4	-0.08545		88.4375	-0.12817
	88.5	-0.0824		88.5	-0.11597
	88.6	-0.06409		88.625	-0.10376
	88.7	-0.13733		88.75	-0.0885
	88.8	-0.11597		88.8125	-0.11902
	88.9	-0.10986		88.9375	-0.11597
	89	-0.10681		89	-0.11597
	89.1	-0.08545		89.125	-0.11597
	89.2	-0.07935		89.25	-0.11292
	89.3	-0.07935		89.3125	-0.07935
	89.4	-0.10071		89.4375	-0.10071
	89.5	-0.07324		89.5	-0.10986
	89.6	-0.11292		89.625	-0.09155
	89.7	-0.10376		89.75	-0.10986
	89.8	-0.10986		89.8125	-0.08545
	89.9	-0.06714		89.9375	-0.10071
	90	-0.08545		90	-0.07629
	90.1	-0.0885		90.125	-0.09766
	90.2	-0.10376		90.25	-0.11292
	90.3	-0.0946		90.3125	-0.13428
	90.4	-0.08545		90.4375	-0.13123
	90.5	-0.10681		90.5	-0.11902
	90.6	-0.0885		90.625	-0.07019
	90.7	-0.10986		90.75	-0.05493
	90.8	-0.10681		90.8125	-0.11902
	90.9	-0.10986		90.9375	-0.0824
	91	-0.10376		91	-0.12817
	91.1	-0.10376		91.125	-0.11597
	91.2	-0.13123		91.25	-0.11292
	91.3	-0.10986		91.3125	-0.10681
	91.4	-0.13733		91.4375	-0.0885
	91.5	-0.13428		91.5	-0.09155
	91.6	-0.18616		91.625	-0.07629
	91.7	-0.17395		91.75	-0.0885
	91.8	-0.16785		91.8125	-0.0946
	91.9	-0.15259		91.9375	-0.11292
	92	-0.14648		92	-0.07019
	92.1	-0.15869		92.125	-0.0824
	92.2	-0.14954		92.25	-0.0885
	92.3	-0.15259		92.3125	-0.0824
	92.4	-0.14343		92.4375	-0.11902
	92.5	-0.14343		92.5	-0.09155
	92.6	-0.13428		92.625	-0.09155
	92.7	-0.13733		92.75	-0.09155
	92.8	-0.10681		92.8125	-0.07019
	92.9	-0.10986		92.9375	-0.0885
	93	-0.11597		93	-0.11902
	93.1	-0.0824		93.125	-0.0946
	93.2	-0.10986		93.25	-0.13123
	93.3	-0.10376		93.3125	-0.12817
	93.4	-0.0946		93.4375	-0.14038
	93.5	-0.10986		93.5	-0.14038
	93.6	-0.09766		93.625	-0.13428
	93.7	-0.07935		93.75	-0.0824
	93.8	-0.0946		93.8125	-0.0885
	93.9	-0.08545		93.9375	-0.10376
	94	-0.10681		94	-0.0885
	94.1	-0.10376		94.125	-0.11597
	94.2	-0.10071		94.25	-0.10376
	94.3	-0.11902		94.3125	-0.10071
	94.4	-0.09766		94.4375	-0.07935
	94.5	-0.08545		94.5	-0.07935
	94.6	-0.07935		94.625	-0.08545
	94.7	-0.0824		94.75	-0.09155
	94.8	-0.05798		94.8125	-0.0946
	94.9	-0.07935		94.9375	-0.09766
	95	-0.10376		95	-0.08545
	95.1	-0.06409		95.125	-0.09766
	95.2	-0.07324		95.25	-0.0885
	95.3	-0.07935		95.3125	-0.06714
	95.4	-0.11292		95.4375	-0.07935
	95.5	-0.11902		95.5	-0.09155
	95.6	-0.10071		95.625	-0.06714
	95.7	-0.10071		95.75	-0.09155
	95.8	-0.09766		95.8125	-0.07019
	95.9	-0.0885		95.9375	-0.09766
	96	-0.10681		96	-0.0946
	96.1	-0.11597		96.125	-0.06714
	96.2	-0.08545		96.25	-0.08545
	96.3	-0.11597		96.3125	-0.0824
	96.4	-0.09766		96.4375	-0.07019
	96.5	-0.11597		96.5	-0.06104
	96.6	-0.10376		96.625	-0.07019
	96.7	-0.10071		96.75	-0.03357
	96.8	-0.10376		96.8125	-0.07019
	96.9	-0.10681		96.9375	-0.02441
	97	-0.10376		97	-0.04883
	97.1	-0.10071		97.125	-0.05798
	97.2	-0.10376		97.25	-0.04272
	97.3	-0.0885		97.3125	-0.04578
	97.4	-0.09766		97.4375	-0.03662
	97.5	-0.07019		97.5	-0.03967
	97.6	-0.10071		97.625	-0.04578
	97.7	-0.09766		97.75	-0.06104
	97.8	-0.0946		97.8125	-0.02747
	97.9	-0.11597		97.9375	-0.06104
	98	-0.07629		98	-0.07019
	98.1	-0.07629		98.125	-0.07324
	98.2	-0.06714		98.25	-0.09766
	98.3	-0.07324		98.3125	-0.04578
	98.4	-0.05493		98.4375	-0.07324
	98.5	-0.10376		98.5	-0.06104
	98.6	-0.08545		98.625	-0.07935
	98.7	-0.08545		98.75	-0.06104
	98.8	-0.12512		98.8125	-0.07935
	98.9	-0.07935		98.9375	-0.09766
	99	-0.10071		99	-0.09766
	99.1	-0.07324		99.125	-0.10681
	99.2	-0.08545		99.25	-0.10071
	99.3	-0.0824		99.3125	-0.11597
	99.4	-0.0824		99.4375	-0.09155
	99.5	-0.0824		99.5	-0.10986
	99.6	-0.0885		99.625	-0.10071
	99.7	-0.11292		99.75	-0.12512
	99.8	-0.09766		99.8125	-0.14038
	99.9	-0.10071		99.9375	-0.12817
	100	-0.06409		100	-0.14954
	100.1	-0.13123		100.125	-0.13733
	100.2	-0.10376		100.25	-0.11902
	100.3	-0.10681		100.312	-0.07324
	100.4	-0.0946		100.438	-0.07629
	100.5	-0.11292		100.5	-0.06714
	100.6	-0.11292		100.625	-0.10071
	100.7	-0.0946		100.75	-0.11597
	100.8	-0.10376		100.812	-0.10681
	100.9	-0.08545		100.938	-0.09155
	101	-0.11292		101	-0.07629
	101.1	-0.07935		101.125	-0.0885
	101.2	-0.0824		101.25	-0.07324
	101.3	-0.05493		101.312	-0.08545
	101.4	-0.06104		101.438	-0.06714
	101.5	-0.0824		101.5	-0.09766
	101.6	-0.06409		101.625	-0.11902
	101.7	-0.07629		101.75	-0.11902
	101.8	-0.05798		101.812	-0.0885
	101.9	-0.07324		101.938	-0.0946
	102	-0.05798		102	-0.11902
	102.1	-0.07019		102.125	-0.0946
	102.2	-0.05798		102.25	-0.11902
	102.3	-0.06714		102.312	-0.10986
	102.4	-0.0824		102.438	-0.14648
	102.5	-0.0824		102.5	-0.11597
	102.6	-0.10681		102.625	-0.09766
	102.7	-0.0885		102.75	-0.12817
	102.8	-0.0946		102.812	-0.09766
	102.9	-0.07324		102.938	-0.12512
	103	-0.09766		103	-0.12207
	103.1	-0.10376		103.125	-0.12207
	103.2	-0.12817		103.25	-0.13123
	103.3	-0.12207		103.312	-0.15564
	103.4	-0.10986		103.438	-0.15564
	103.5	-0.12207		103.5	-0.14954
	103.6	-0.10681		103.625	-0.13733
	103.7	-0.11597		103.75	-0.10986
	103.8	-0.10681		103.812	-0.13428
	103.9	-0.13428		103.938	-0.10376
	104	-0.11902		104	-0.12512
	104.1	-0.14343		104.125	-0.10986
	104.2	-0.11902		104.25	-0.0824
	104.3	-0.12512		104.312	-0.09155
	104.4	-0.13428		104.438	-0.14038
	104.5	-0.12207		104.5	-0.13123
	104.6	-0.14648		104.625	-0.11902
	104.7	-0.13123		104.75	-0.13733
	104.8	-0.14648		104.812	-0.09155
	104.9	-0.13428		104.938	-0.11902
	105	-0.13123		105	-0.0946
	105.1	-0.11902		105.125	-0.07935
	105.2	-0.10681		105.25	-0.06409
	105.3	-0.11597		105.312	-0.07324
	105.4	-0.11597		105.438	-0.10071
	105.5	-0.13733		105.5	-0.11597
	105.6	-0.11597		105.625	-0.14343
	105.7	-0.13123		105.75	-0.11902
	105.8	-0.13428		105.812	-0.12817
	105.9	-0.11292		105.938	-0.07935
	106	-0.10071		106	-0.12817
	106.1	-0.12512		106.125	-0.11597
	106.2	-0.10986		106.25	-0.12207
	106.3	-0.11902		106.312	-0.12817
	106.4	-0.11597		106.438	-0.12512
	106.5	-0.07935		106.5	-0.12207
	106.6	-0.11292		106.625	-0.14343
	106.7	-0.09766		106.75	-0.15564
	106.8	-0.11902		106.812	-0.14954
	106.9	-0.12512		106.938	-0.14954
	107	-0.10071		107	-0.13428
	107.1	-0.10986		107.125	-0.14954
	107.2	-0.11902		107.25	-0.11902
	107.3	-0.10071		107.312	-0.12817
	107.4	-0.11292		107.438	-0.177
	107.5	-0.12817		107.5	-0.15869
	107.6	-0.11292		107.625	-0.17395
	107.7	-0.12817		107.75	-0.14954
	107.8	-0.0824		107.812	-0.15564
	107.9	-0.09155		107.938	-0.14038
	108	-0.10986		108	-0.14343
	108.1	-0.10986		108.125	-0.10986
	108.2	-0.15564		108.25	-0.12207
	108.3	-0.13123		108.312	-0.09766
	108.4	-0.09155		108.438	-0.0885
	108.5	-0.0824		108.5	-0.11902
	108.6	-0.11902		108.625	-0.12512
	108.7	-0.09155		108.75	-0.13733
	108.8	-0.13428		108.812	-0.13733
	108.9	-0.10681		108.938	-0.12817
	109	-0.08545		109	-0.12207
	109.1	-0.11902		109.125	-0.14038
	109.2	-0.10986		109.25	-0.13733
	109.3	-0.0946		109.312	-0.11597
	109.4	-0.05188		109.438	-0.11292
	109.5	-0.0946		109.5	-0.10071
	109.6	-0.09766		109.625	-0.12207
	109.7	-0.11292		109.75	-0.09155
	109.8	-0.10681		109.812	-0.09766
	109.9	-0.13733		109.938	-0.09155
	110	-0.14038		110	-0.10376
	110.1	-0.11902		110.125	-0.0885
	110.2	-0.14343		110.25	-0.12207
	110.3	-0.11597		110.312	-0.14954
	110.4	-0.14954		110.438	-0.13428
	110.5	-0.15564		110.5	-0.11902
	110.6	-0.15564		110.625	-0.10986
	110.7	-0.16479		110.75	-0.10986
	110.8	-0.1709		110.812	-0.10071
	110.9	-0.1709		110.938	-0.11292
	111	-0.15869		111	-0.11292
	111.1	-0.14343		111.125	-0.11597
	111.2	-0.16174		111.25	-0.08545
	111.3	-0.15259		111.312	-0.06409
	111.4	-0.12512		111.438	-0.07324
	111.5	-0.14038		111.5	-0.07019
	111.6	-0.13733		111.625	-0.10376
	111.7	-0.14954		111.75	-0.0885
	111.8	-0.15564		111.812	-0.07629
	111.9	-0.15564		111.938	-0.11292
	112	-0.16174		112	-0.11597
	112.1	-0.14954		112.125	-0.10071
	112.2	-0.16479		112.25	-0.09155
	112.3	-0.14954		112.312	-0.0885
	112.4	-0.15869		112.438	-0.0946
	112.5	-0.12207		112.5	-0.13733
	112.6	-0.12817		112.625	-0.11292
	112.7	-0.11902		112.75	-0.13428
	112.8	-0.11292		112.812	-0.11292
	112.9	-0.12512		112.938	-0.10986
	113	-0.09155		113	-0.10071
	113.1	-0.10071		113.125	-0.11292
	113.2	-0.09766		113.25	-0.13428
	113.3	-0.10681		113.312	-0.0946
	113.4	-0.0946		113.438	-0.0885
	113.5	-0.0946		113.5	-0.06104
	113.6	-0.10986		113.625	-0.09766
	113.7	-0.0946		113.75	-0.05188
	113.8	-0.0824		113.812	-0.10071
	113.9	-0.05798		113.938	-0.10986
	114	-0.05188		114	-0.0824
	114.1	-0.04578		114.125	-0.10986
	114.2	-0.07324		114.25	-0.0885
	114.3	-0.07629		114.312	-0.09766
	114.4	-0.11292		114.438	-0.07629
	114.5	-0.09766		114.5	-0.08545
	114.6	-0.10376		114.625	-0.06409
	114.7	-0.10376		114.75	-0.08545
	114.8	-0.05188		114.812	-0.09766
	114.9	-0.07629		114.938	-0.12817
	115	-0.09766		115	-0.12207
	115.1	-0.10986		115.125	-0.08545
	115.2	-0.11292		115.25	-0.13428
	115.3	-0.12512		115.312	-0.13123
	115.4	-0.09766		115.438	-0.13123
	115.5	-0.08545		115.5	-0.12207
	115.6	-0.10376		115.625	-0.0946
	115.7	-0.09766		115.75	-0.07019
	115.8	-0.11292		115.812	-0.07019
	115.9	-0.09155		115.938	-0.07935
	116	-0.0946		116	-0.06714
	116.1	-0.10376		116.125	-0.0946
	116.2	-0.11597		116.25	-0.06409
	116.3	-0.0824		116.312	-0.09155
	116.4	-0.0824		116.438	-0.09155
	116.5	-0.06714		116.5	-0.06104
	116.6	-0.09155		116.625	-0.06409
	116.7	-0.12817		116.75	-0.04272
	116.8	-0.07935		116.812	-0.04883
	116.9	-0.10376		116.938	-0.05188
	117	-0.08545		117	-0.07935
	117.1	-0.0946		117.125	-0.06104
	117.2	-0.09766		117.25	-0.06714
	117.3	-0.0824		117.312	-0.03052
	117.4	-0.09155		117.438	-0.06104
	117.5	-0.07935		117.5	-0.05493
	117.6	-0.07019		117.625	-0.05798
	117.7	-0.06409		117.75	-0.07019
	117.8	-0.07324		117.812	-0.04578
	117.9	-0.04578		117.938	-0.07935
	118	-0.07019		118	-0.06409
	118.1	-0.05798		118.125	-0.06409
	118.2	-0.06714		118.25	-0.06104
	118.3	-0.0824		118.312	-0.0824
	118.4	-0.09155		118.438	-0.05798
	118.5	-0.09155		118.5	-0.0885
	118.6	-0.10376		118.625	-0.08545
	118.7	-0.11292		118.75	-0.09155
	118.8	-0.10681		118.812	-0.12207
	118.9	-0.13123		118.938	-0.07935
	119	-0.08545		119	-0.10376
	119.1	-0.09155		119.125	-0.10681
	119.2	-0.0946		119.25	-0.10376
	119.3	-0.10376		119.312	-0.07019
	119.4	-0.0946		119.438	-0.07629
	119.5	-0.0824		119.5	-0.06104
	119.6	-0.11597		119.625	-0.07629
	119.7	-0.11292		119.75	-0.0946
	119.8	-0.10071		119.812	-0.0946
	119.9	-0.0946		119.938	-0.14343
	120	-0.08545		120	-0.14343
	120.1	-0.04578		120.125	-0.11597
	120.2	-0.07019		120.25	-0.08545
	120.3	-0.06714		120.312	-0.06409
	120.4	-0.06104		120.438	-0.07629
	120.5	-0.06409		120.5	-0.10681
	120.6	-0.05188		120.625	-0.12817
	120.7	-0.07935		120.75	-0.13428
	120.8	-0.08545		120.812	-0.13428
	120.9	-0.06409		120.938	-0.09155
	121	-0.03967		121	-0.07935
	121.1	-0.05188		121.125	-0.07935
	121.2	-0.05493		121.25	-0.09155
	121.3	-0.04272		121.312	-0.0946
	121.4	-0.06104		121.438	-0.11597
	121.5	-0.03052		121.5	-0.12207
	121.6	-0.04578		121.625	-0.09766
	121.7	-0.01526		121.75	-0.12817
	121.8	-0.03357		121.812	-0.10071
	121.9	-0.03662		121.938	-0.10376
	122	-0.04272		122	-0.07629
	122.1	-0.05188		122.125	-0.10376
	122.2	-0.04578		122.25	-0.07935
	122.3	-0.05188		122.312	-0.0824
	122.4	-0.05493		122.438	-0.10376
	122.5	-0.07019		122.5	-0.07324
	122.6	-0.06409		122.625	-0.09766
	122.7	-0.10986		122.75	-0.08545
	122.8	-0.09155		122.812	-0.0946
	122.9	-0.09766		122.938	-0.09155
	123	-0.09766		123	-0.0946
	123.1	-0.07935		123.125	-0.10681
	123.2	-0.11292		123.25	-0.0946
	123.3	-0.10681		123.312	-0.08545
	123.4	-0.13733		123.438	-0.07324
	123.5	-0.12817		123.5	-0.0946
	123.6	-0.13428		123.625	-0.10376
	123.7	-0.13428		123.75	-0.10681
	123.8	-0.14648		123.812	-0.0885
	123.9	-0.11902		123.938	-0.10376
	124	-0.12207		124	-0.0885
	124.1	-0.11292		124.125	-0.10681
	124.2	-0.12512		124.25	-0.11597
	124.3	-0.15564		124.312	-0.07629
	124.4	-0.12512		124.438	-0.12207
	124.5	-0.17395		124.5	-0.10986
	124.6	-0.14038		124.625	-0.11292
	124.7	-0.14648		124.75	-0.0946
	124.8	-0.14954		124.812	-0.10376
	124.9	-0.11902		124.938	-0.0946
	125	-0.13428		125	-0.12512
	125.1	-0.13733		125.125	-0.0946
	125.2	-0.15564		125.25	-0.06409
	125.3	-0.14648		125.312	-0.09155
	125.4	-0.13428		125.438	-0.0885
	125.5	-0.10986		125.5	-0.12207
	125.6	-0.11597		125.625	-0.10681
	125.7	-0.10986		125.75	-0.14038
	125.8	-0.12817		125.812	-0.13428
	125.9	-0.11292		125.938	-0.13123
	126	-0.10376		126	-0.0885
	126.1	-0.11902		126.125	-0.11902
	126.2	-0.10376		126.25	-0.11292
	126.3	-0.10986		126.312	-0.0885
	126.4	-0.11902		126.438	-0.11902
	126.5	-0.13428		126.5	-0.0885
	126.6	-0.14038		126.625	-0.13428
	126.7	-0.12512		126.75	-0.14343
	126.8	-0.10986		126.812	-0.15259
	126.9	-0.10376		126.938	-0.12817
	127	-0.12207		127	-0.14343
	127.1	-0.09766		127.125	-0.11292
	127.2	-0.09155		127.25	-0.12512
	127.3	-0.0824		127.312	-0.11597
	127.4	-0.09155		127.438	-0.15259
	127.5	-0.11902		127.5	-0.15564
	127.6	-0.13733		127.625	-0.12817
	127.7	-0.11292		127.75	-0.14038
	127.8	-0.10681		127.812	-0.13123
	127.9	-0.09766		127.938	-0.13123
	128	-0.10376		128	-0.14343
	128.1	-0.12512		128.125	-0.13428
	128.2	-0.09155		128.25	-0.13428
	128.3	-0.10681		128.312	-0.14038
	128.4	-0.09155		128.438	-0.13428
	128.5	-0.09155		128.5	-0.14648
	128.6	-0.07324		128.625	-0.13123
	128.7	-0.09766		128.75	-0.0946
	128.8	-0.10376		128.812	-0.13428
	128.9	-0.11597		128.938	-0.12512
	129	-0.14648		129	-0.11597
	129.1	-0.10376		129.125	-0.12512
	129.2	-0.12817		129.25	-0.0946
	129.3	-0.10071		129.312	-0.08545
	129.4	-0.11902		129.438	-0.07324
	129.5	-0.0885		129.5	-0.06409
	129.6	-0.10986		129.625	-0.05493
	129.7	-0.12512		129.75	-0.06409
	129.8	-0.0885		129.812	-0.03967
	129.9	-0.10986		129.938	-0.06104
	130	-0.12817		130	-0.06714
	130.1	-0.12817		130.125	-0.07935
	130.2	-0.12207		130.25	-0.12817
	130.3	-0.13123		130.312	-0.12207
	130.4	-0.09155		130.438	-0.12817
	130.5	-0.10986		130.5	-0.12512
	130.6	-0.13428		130.625	-0.11292
	130.7	-0.14038		130.75	-0.0824
	130.8	-0.16479		130.812	-0.06409
	130.9	-0.14954		130.938	-0.07019
	131	-0.177		131	-0.08545
	131.1	-0.15259		131.125	-0.12817
	131.2	-0.16174		131.25	-0.10681
	131.3	-0.12512		131.312	-0.11902
	131.4	-0.14343		131.438	-0.07935
	131.5	-0.13123		131.5	-0.07019
	131.6	-0.14954		131.625	-0.0885
	131.7	-0.16785		131.75	-0.10376
	131.8	-0.13428		131.812	-0.11597
	131.9	-0.16479		131.938	-0.10986
	132	-0.12512		132	-0.11902
	132.1	-0.13123		132.125	-0.10071
	132.2	-0.11902		132.25	-0.10071
	132.3	-0.11597		132.312	-0.0946
	132.4	-0.10986		132.438	-0.10681
	132.5	-0.09766		132.5	-0.07629
	132.6	-0.11292		132.625	-0.0824
	132.7	-0.10376		132.75	-0.0885
	132.8	-0.10681		132.812	-0.06104
	132.9	-0.07324		132.938	-0.0824
	133	-0.09766		133	-0.07324
	133.1	-0.0885		133.125	-0.10986
	133.2	-0.09155		133.25	-0.09155
	133.3	-0.09155		133.312	-0.10681
	133.4	-0.07324		133.438	-0.10986
	133.5	-0.0824		133.5	-0.12512
	133.6	-0.07629		133.625	-0.0946
	133.7	-0.07935		133.75	-0.07935
	133.8	-0.07019		133.812	-0.07629
	133.9	-0.07019		133.938	-0.04272
	134	-0.07019		134	-0.07324
	134.1	-0.09766		134.125	-0.05188
	134.2	-0.07019		134.25	-0.06409
	134.3	-0.0824		134.312	-0.05493
	134.4	-0.06409		134.438	-0.07935
	134.5	-0.04883		134.5	-0.07935
	134.6	-0.08545		134.625	-0.10071
	134.7	-0.08545		134.75	-0.10071
	134.8	-0.09766		134.812	-0.07324
	134.9	-0.07935		134.938	-0.07629
	135	-0.07019		135	-0.0824
	135.1	-0.03967		135.125	-0.07935
	135.2	-0.05798		135.25	-0.07935
	135.3	-0.06714		135.312	-0.10681
	135.4	-0.06104		135.438	-0.09155
	135.5	-0.08545		135.5	-0.09766
	135.6	-0.06104		135.625	-0.11292
	135.7	-0.07629		135.75	-0.06714
	135.8	-0.07935		135.812	-0.06714
	135.9	-0.0946		135.938	-0.05798
	136	-0.07324		136	-0.05493
	136.1	-0.08545		136.125	-0.07324
	136.2	-0.0885		136.25	-0.08545
	136.3	-0.0946		136.312	-0.0885
	136.4	-0.11292		136.438	-0.11292
	136.5	-0.0946		136.5	-0.12512
	136.6	-0.11902		136.625	-0.11292
	136.7	-0.0946		136.75	-0.0824
	136.8	-0.0946		136.812	-0.03052
	136.9	-0.0885		136.938	-0.05798
	137	-0.10071		137	-0.05188
	137.1	-0.09766		137.125	-0.05798
	137.2	-0.09155		137.25	-0.05493
	137.3	-0.10071		137.312	-0.03662
	137.4	-0.08545		137.438	-0.04272
	137.5	-0.0946		137.5	-0.02441
	137.6	-0.0885		137.625	-0.02441
	137.7	-0.09155		137.75	-0.02441
	137.8	-0.07324		137.812	-0.07019
	137.9	-0.09766		137.938	-0.04272
	138	-0.0885		138	-0.07935
	138.1	-0.11292		138.125	-0.07935
	138.2	-0.11292		138.25	-0.07629
	138.3	-0.10681		138.312	-0.0946
	138.4	-0.09155		138.438	-0.07935
	138.5	-0.04578		138.5	-0.0946
	138.6	-0.07019		138.625	-0.08545
	138.7	-0.07629		138.75	-0.08545
	138.8	-0.09155		138.812	-0.0946
	138.9	-0.05188		138.938	-0.11902
	139	-0.06714		139	-0.0824
	139.1	-0.07629		139.125	-0.08545
	139.2	-0.08545		139.25	-0.09155
	139.3	-0.10376		139.312	-0.06714
	139.4	-0.10071		139.438	-0.10681
	139.5	-0.12817		139.5	-0.07935
	139.6	-0.0824		139.625	-0.08545
	139.7	-0.13123		139.75	-0.10986
	139.8	-0.13123		139.812	-0.10681
	139.9	-0.10986		139.938	-0.10376
	140	-0.09766		140	-0.11292
	140.1	-0.08545		140.125	-0.0885
	140.2	-0.10986		140.25	-0.11902
	140.3	-0.09155		140.312	-0.10071
	140.4	-0.07629		140.438	-0.07324
	140.5	-0.06714		140.5	-0.10986
	140.6	-0.10376		140.625	-0.11597
	140.7	-0.07935		140.75	-0.12207
	140.8	-0.0885		140.812	-0.12817
	140.9	-0.07019		140.938	-0.14954
	141	-0.06104		141	-0.11597
	141.1	-0.08545		141.125	-0.10376
	141.2	-0.07629		141.25	-0.09155
	141.3	-0.07935		141.312	-0.10376
	141.4	-0.07629		141.438	-0.14648
	141.5	-0.07629		141.5	-0.12512
	141.6	-0.07629		141.625	-0.14343
	141.7	-0.0885		141.75	-0.10986
	141.8	-0.05798		141.812	-0.10986
	141.9	-0.06714		141.938	-0.07935
	142	-0.07324		142	-0.0824
	142.1	-0.04883		142.125	-0.10986
	142.2	-0.07935		142.25	-0.0946
	142.3	-0.04883		142.312	-0.0946
	142.4	-0.06714		142.438	-0.06104
	142.5	-0.07019		142.5	-0.06714
	142.6	-0.07935		142.625	-0.08545
	142.7	-0.07935		142.75	-0.10376
	142.8	-0.10376		142.812	-0.07629
	142.9	-0.11902		142.938	-0.0946
	143	-0.11597		143	-0.09766
	143.1	-0.13428		143.125	-0.09155
	143.2	-0.12207		143.25	-0.10071
	143.3	-0.14954		143.312	-0.10681
	143.4	-0.15259		143.438	-0.12207
	143.5	-0.13123		143.5	-0.13123
	143.6	-0.15259		143.625	-0.12512
	143.7	-0.12207		143.75	-0.10376
	143.8	-0.13428		143.812	-0.12207
	143.9	-0.14343		143.938	-0.11597
	144	-0.12817		144	-0.14954
	144.1	-0.13733		144.125	-0.14343
	144.2	-0.11597		144.25	-0.15259
	144.3	-0.08545		144.312	-0.12512
	144.4	-0.0946		144.438	-0.12207
	144.5	-0.0824		144.5	-0.13123
	144.6	-0.11292		144.625	-0.11292
	144.7	-0.13733		144.75	-0.09766
	144.8	-0.12817		144.812	-0.10986
	144.9	-0.13428		144.938	-0.09155
	145	-0.11597		145	-0.11292
	145.1	-0.10986		145.125	-0.10986
	145.2	-0.07629		145.25	-0.11597
	145.3	-0.07935		145.312	-0.08545
	145.4	-0.07019		145.438	-0.11902
	145.5	-0.09766		145.5	-0.12207
	145.6	-0.0885		145.625	-0.11292
	145.7	-0.0824		145.75	-0.07629
	145.8	-0.10376		145.812	-0.09766
	145.9	-0.10376		145.938	-0.13123
	146	-0.09766		146	-0.13428
	146.1	-0.0885		146.125	-0.15564
	146.2	-0.11292		146.25	-0.14648
	146.3	-0.09766		146.312	-0.1709
	146.4	-0.11902		146.438	-0.16785
	146.5	-0.10376		146.5	-0.15869
	146.6	-0.11292		146.625	-0.16174
	146.7	-0.11292		146.75	-0.18005
	146.8	-0.10071		146.812	-0.16479
	146.9	-0.12817		146.938	-0.17395
	147	-0.10376		147	-0.18311
	147.1	-0.09155		147.125	-0.14954
	147.2	-0.08545		147.25	-0.15564
	147.3	-0.10071		147.312	-0.13733
	147.4	-0.10376		147.438	-0.14954
	147.5	-0.10681		147.5	-0.14038
	147.6	-0.11292		147.625	-0.16785
	147.7	-0.10376		147.75	-0.13428
	147.8	-0.10376		147.812	-0.11902
	147.9	-0.11597		147.938	-0.12207
	148	-0.14343		148	-0.12207
	148.1	-0.12817		148.125	-0.13428
	148.2	-0.13733		148.25	-0.09766
	148.3	-0.12207		148.312	-0.10986
	148.4	-0.13428		148.438	-0.10071
	148.5	-0.13733		148.5	-0.09766
	148.6	-0.12817		148.625	-0.0885
	148.7	-0.11902		148.75	-0.10071
	148.8	-0.10681		148.812	-0.12817
	148.9	-0.11597		148.938	-0.11597
	149	-0.0824		149	-0.12512
	149.1	-0.10986		149.125	-0.11292
	149.2	-0.10681		149.25	-0.14954
	149.3	-0.10681		149.312	-0.10376
	149.4	-0.10681		149.438	-0.10376
	149.5	-0.12207		149.5	-0.09155
	149.6	-0.12207		149.625	-0.07935
	149.7	-0.10071		149.75	-0.09766
	149.8	-0.13123		149.812	-0.10071
	149.9	-0.11902		149.938	-0.10986
	150	-0.10986		150	-0.10071
	150.1	-0.11902		150.125	-0.09155
	150.2	-0.12512		150.25	-0.09155
	150.3	-0.12512		150.312	-0.12512
	150.4	-0.10071		150.438	-0.0946
	150.5	-0.11292		150.5	-0.12817
	150.6	-0.11292		150.625	-0.11902
	150.7	-0.12817		150.75	-0.07324
	150.8	-0.13428		150.812	-0.13123
	150.9	-0.15259		150.938	-0.11902
	151	-0.13123		151	-0.10071
	151.1	-0.13733		151.125	-0.10071
	151.2	-0.14038		151.25	-0.08545
	151.3	-0.12512		151.312	-0.0824
	151.4	-0.14648		151.438	-0.10986
	151.5	-0.14648		151.5	-0.0946
	151.6	-0.14038		151.625	-0.11292
	151.7	-0.14954		151.75	-0.10986
	151.8	-0.15259		151.812	-0.09766
	151.9	-0.13428		151.938	-0.14343
	152	-0.15869		152	-0.12817
	152.1	-0.13733		152.125	-0.10986
	152.2	-0.14648		152.25	-0.07324
	152.3	-0.13428		152.312	-0.08545
	152.4	-0.0946		152.438	-0.10071
	152.5	-0.11902		152.5	-0.10681
	152.6	-0.12207		152.625	-0.12817
	152.7	-0.12817		152.75	-0.11902
	152.8	-0.12207		152.812	-0.14038
	152.9	-0.11292		152.938	-0.10071
	153	-0.09155		153	-0.12512
	153.1	-0.10681		153.125	-0.10071
	153.2	-0.09155		153.25	-0.0885
	153.3	-0.06409		153.312	-0.10986
	153.4	-0.0824		153.438	-0.09155
	153.5	-0.05798		153.5	-0.08545
	153.6	-0.10071		153.625	-0.06714
	153.7	-0.07629		153.75	-0.0824
	153.8	-0.06714		153.812	-0.0824
	153.9	-0.07019		153.938	-0.0824
	154	-0.06409		154	-0.0824
	154.1	-0.07629		154.125	-0.0946
	154.2	-0.06714		154.25	-0.07629
	154.3	-0.06409		154.312	-0.06409
	154.4	-0.06104		154.438	-0.10376
	154.5	-0.10071		154.5	-0.06409
	154.6	-0.05798		154.625	-0.0946
	154.7	-0.06409		154.75	-0.06714
	154.8	-0.05188		154.812	-0.0885
	154.9	-0.06714		154.938	-0.0824
	155	-0.06714		155	-0.11292
	155.1	-0.09155		155.125	-0.10986
	155.2	-0.11292		155.25	-0.10986
	155.3	-0.07935		155.312	-0.11292
	155.4	-0.0885		155.438	-0.10071
	155.5	-0.06104		155.5	-0.10071
	155.6	-0.10071		155.625	-0.07629
	155.7	-0.07324		155.75	-0.09766
	155.8	-0.06714		155.812	-0.07935
	155.9	-0.07629		155.938	-0.07324
	156	-0.07324		156	-0.03967
	156.1	-0.10681		156.125	-0.07629
	156.2	-0.08545		156.25	-0.10681
	156.3	-0.0885		156.312	-0.09155
	156.4	-0.08545		156.438	-0.0946
	156.5	-0.0824		156.5	-0.07324
	156.6	-0.07935		156.625	-0.08545
	156.7	-0.0885		156.75	-0.06409
	156.8	-0.07324		156.812	-0.06409
	156.9	-0.07935		156.938	-0.04883
	157	-0.08545		157	-0.06409
	157.1	-0.05798		157.125	-0.07324
	157.2	-0.10376		157.25	-0.04883
	157.3	-0.0946		157.312	-0.05188
	157.4	-0.11902		157.438	-0.03052
	157.5	-0.11597		157.5	-0.06104
	157.6	-0.10986		157.625	-0.06409
	157.7	-0.11902		157.75	-0.07019
	157.8	-0.10681		157.812	-0.06104
	157.9	-0.11292		157.938	-0.08545
	158	-0.10681		158	-0.07629
	158.1	-0.0885		158.125	-0.06104
	158.2	-0.06714		158.25	-0.09155
	158.3	-0.11597		158.312	-0.07019
	158.4	-0.0946		158.438	-0.11292
	158.5	-0.06409		158.5	-0.08545
	158.6	-0.07019		158.625	-0.10376
	158.7	-0.07324		158.75	-0.10376
	158.8	-0.07019		158.812	-0.08545
	158.9	-0.08545		158.938	-0.10071
	159	-0.11292		159	-0.10376
	159.1	-0.10376		159.125	-0.09155
	159.2	-0.11292		159.25	-0.10376
	159.3	-0.0946		159.312	-0.11292
	159.4	-0.07324		159.438	-0.11597
	159.5	-0.06104		159.5	-0.11597
	159.6	-0.07324		159.625	-0.0824
	159.7	-0.0885		159.75	-0.09766
	159.8	-0.07324		159.812	-0.10071
	159.9	-0.10071		159.938	-0.12207
	160	-0.10071		160	-0.11597
	160.1	-0.09766		160.125	-0.13428
	160.2	-0.07935		160.25	-0.14343
	160.3	-0.09155		160.312	-0.14648
	160.4	-0.10376		160.438	-0.12512
	160.5	-0.10986		160.5	-0.11902
	160.6	-0.14954		160.625	-0.13733
	160.7	-0.12512		160.75	-0.10681
	160.8	-0.10071		160.812	-0.11292
	160.9	-0.0885		160.938	-0.11597
	161	-0.07629		161	-0.10376
	161.1	-0.05798		161.125	-0.12512
	161.2	-0.07629		161.25	-0.10986
	161.3	-0.05188		161.312	-0.07935
	161.4	-0.05188		161.438	-0.10071
	161.5	-0.04578		161.5	-0.11597
	161.6	-0.03052		161.625	-0.09155
	161.7	-0.04883		161.75	-0.07629
	161.8	-0.03967		161.812	-0.0824
	161.9	-0.06409		161.938	-0.09155
	162	-0.08545		162	-0.12512
	162.1	-0.10071		162.125	-0.09155
	162.2	-0.07629		162.25	-0.10376
	162.3	-0.07629		162.312	-0.11597
	162.4	-0.06104		162.438	-0.10986
	162.5	-0.07935		162.5	-0.10071
	162.6	-0.10986		162.625	-0.09766
	162.7	-0.0824		162.75	-0.10071
	162.8	-0.09155		162.812	-0.10376
	162.9	-0.0885		162.938	-0.09766
	163	-0.08545		163	-0.11292
	163.1	-0.08545		163.125	-0.11902
	163.2	-0.11292		163.25	-0.09155
	163.3	-0.0824		163.312	-0.12512
	163.4	-0.11597		163.438	-0.09766
	163.5	-0.10376		163.5	-0.13123
	163.6	-0.11597		163.625	-0.12207
	163.7	-0.15259		163.75	-0.11292
	163.8	-0.11597		163.812	-0.12512
	163.9	-0.13428		163.938	-0.13123
	164	-0.12817		164	-0.15869
	164.1	-0.09766		164.125	-0.10376
	164.2	-0.11597		164.25	-0.14038
	164.3	-0.14038		164.312	-0.13428
	164.4	-0.14038		164.438	-0.13123
	164.5	-0.14038		164.5	-0.10376
	164.6	-0.13733		164.625	-0.13733
	164.7	-0.12207		164.75	-0.12817
	164.8	-0.11597		164.812	-0.09766
	164.9	-0.09766		164.938	-0.11902
	165	-0.12207		165	-0.11292
	165.1	-0.10071		165.125	-0.10986
	165.2	-0.10681		165.25	-0.10071
	165.3	-0.14038		165.312	-0.0885
	165.4	-0.12512		165.438	-0.05493
	165.5	-0.12817		165.5	-0.07629
	165.6	-0.10376		165.625	-0.11292
	165.7	-0.11902		165.75	-0.07019
	165.8	-0.0824		165.812	-0.10986
	165.9	-0.0946		165.938	-0.10071
	166	-0.09766		166	-0.12817
	166.1	-0.0946		166.125	-0.11292
	166.2	-0.10071		166.25	-0.11902
	166.3	-0.10376		166.312	-0.10681
	166.4	-0.10681		166.438	-0.11292
	166.5	-0.10376		166.5	-0.12207
	166.6	-0.0885		166.625	-0.12512
	166.7	-0.10376		166.75	-0.14343
	166.8	-0.11292		166.812	-0.13733
	166.9	-0.08545		166.938	-0.15869
	167	-0.09766		167	-0.14648
	167.1	-0.05798		167.125	-0.16174
	167.2	-0.07019		167.25	-0.12817
	167.3	-0.07629		167.312	-0.13733
	167.4	-0.07019		167.438	-0.13428
	167.5	-0.10986		167.5	-0.15259
	167.6	-0.09766		167.625	-0.177
	167.7	-0.10376		167.75	-0.13123
	167.8	-0.10681		167.812	-0.13733
	167.9	-0.11292		167.938	-0.13733
	168	-0.11597		168	-0.15869
	168.1	-0.12512		168.125	-0.12207
	168.2	-0.10986		168.25	-0.13733
	168.3	-0.11292		168.312	-0.11902
	168.4	-0.16479		168.438	-0.14648
	168.5	-0.13428		168.5	-0.16785
	168.6	-0.12207		168.625	-0.13733
	168.7	-0.0946		168.75	-0.14038
	168.8	-0.0824		168.812	-0.10681
	168.9	-0.09155		168.938	-0.10986
	169	-0.10681		169	-0.09766
	169.1	-0.10071		169.125	-0.09155
	169.2	-0.0885		169.25	-0.07935
	169.3	-0.13428		169.312	-0.08545
	169.4	-0.12207		169.438	-0.10376
	169.5	-0.12817		169.5	-0.0885
	169.6	-0.11597		169.625	-0.10071
	169.7	-0.10986		169.75	-0.07324
	169.8	-0.09155		169.812	-0.0946
	169.9	-0.09766		169.938	-0.07935
	170	-0.11902		170	-0.09766
	170.1	-0.10681		170.125	-0.12512
	170.2	-0.13428		170.25	-0.10986
	170.3	-0.11902		170.312	-0.11292
	170.4	-0.14648		170.438	-0.10376
	170.5	-0.12512		170.5	-0.11597
	170.6	-0.13733		170.625	-0.0824
	170.7	-0.14038		170.75	-0.0824
	170.8	-0.14038		170.812	-0.07019
	170.9	-0.14038		170.938	-0.10376
	171	-0.12817		171	-0.0824
	171.1	-0.15869		171.125	-0.07629
	171.2	-0.13733		171.25	-0.09155
	171.3	-0.14038		171.312	-0.04578
	171.4	-0.11902		171.438	-0.09766
	171.5	-0.11902		171.5	-0.07935
	171.6	-0.10681		171.625	-0.06409
	171.7	-0.12817		171.75	-0.06714
	171.8	-0.14648		171.812	-0.08545
	171.9	-0.12207		171.938	-0.07629
	172	-0.13428		172	-0.10986
	172.1	-0.12512		172.125	-0.08545
	172.2	-0.13733		172.25	-0.0946
	172.3	-0.11597		172.312	-0.11902
	172.4	-0.12512		172.438	-0.07629
	172.5	-0.10681		172.5	-0.11292
	172.6	-0.10376		172.625	-0.0824
	172.7	-0.09766		172.75	-0.09155
	172.8	-0.09155		172.812	-0.09155
	172.9	-0.10376		172.938	-0.07935
	173	-0.09155		173	-0.06714
	173.1	-0.07629		173.125	-0.09766
	173.2	-0.07324		173.25	-0.10071
	173.3	-0.07019		173.312	-0.08545
	173.4	-0.06714		173.438	-0.10986
	173.5	-0.0824		173.5	-0.07629
	173.6	-0.05188		173.625	-0.10986
	173.7	-0.06409		173.75	-0.10376
	173.8	-0.05188		173.812	-0.10681
	173.9	-0.04883		173.938	-0.11902
	174	-0.0946		174	-0.07629
	174.1	-0.07629		174.125	-0.0946
	174.2	-0.10071		174.25	-0.0946
	174.3	-0.07935		174.312	-0.09155
	174.4	-0.05798		174.438	-0.06409
	174.5	-0.07324		174.5	-0.08545
	174.6	-0.03967		174.625	-0.06409
	174.7	-0.06104		174.75	-0.09766
	174.8	-0.0824		174.812	-0.0885
	174.9	-0.08545		174.938	-0.05798
	175	-0.04272		175	-0.0946
	175.1	-0.06714		175.125	-0.07935
	175.2	-0.07019		175.25	-0.0885
	175.3	-0.0946		175.312	-0.0885
	175.4	-0.07324		175.438	-0.11597
	175.5	-0.0824		175.5	-0.0946
	175.6	-0.07935		175.625	-0.10376
	175.7	-0.09155		175.75	-0.05493
	175.8	-0.08545		175.812	-0.09766
	175.9	-0.07019		175.938	-0.0885
	176	-0.10376		176	-0.07019
	176.1	-0.07935		176.125	-0.06714
	176.2	-0.0946		176.25	-0.04578
	176.3	-0.07935		176.312	-0.03662
	176.4	-0.0946		176.438	-0.05493
	176.5	-0.12512		176.5	-0.06409
	176.6	-0.10986		176.625	-0.06714
	176.7	-0.13123		176.75	-0.08545
	176.8	-0.11902		176.812	-0.06104
	176.9	-0.0946		176.938	-0.07324
	177	-0.09766		177	-0.06104
	177.1	-0.10376		177.125	-0.06409
	177.2	-0.0946		177.25	-0.07324
	177.3	-0.10986		177.312	-0.07629
	177.4	-0.10376		177.438	-0.07324
	177.5	-0.10986		177.5	-0.07324
	177.6	-0.12207		177.625	-0.06409
	177.7	-0.07019		177.75	-0.06409
	177.8	-0.07324		177.812	-0.06714
	177.9	-0.07324		177.938	-0.04883
	178	-0.07935		178	-0.06104
	178.1	-0.08545		178.125	-0.06104
	178.2	-0.07935		178.25	-0.05798
	178.3	-0.03967		178.312	-0.05798
	178.4	-0.06714		178.438	-0.06409
	178.5	-0.0824		178.5	-0.0885
	178.6	-0.04578		178.625	-0.11597
	178.7	-0.0824		178.75	-0.09766
	178.8	-0.05798		178.812	-0.10986
	178.9	-0.07935		178.938	-0.11902
	179	-0.07629		179	-0.13733
	179.1	-0.10681		179.125	-0.10986
	179.2	-0.10071		179.25	-0.10681
	179.3	-0.11292		179.312	-0.09155
	179.4	-0.11292		179.438	-0.11597
	179.5	-0.10071		179.5	-0.09766
	179.6	-0.11292		179.625	-0.11902
	179.7	-0.10681		179.75	-0.10986
	179.8	-0.10986		179.812	-0.11292
	179.9	-0.0885		179.938	-0.12512
	180	-0.10376		180	-0.09766
	180.1	-0.05493		180.125	-0.13123
	180.2	-0.07935		180.25	-0.10071
	180.3	-0.0946		180.312	-0.10986
	180.4	-0.07324		180.438	-0.07935
	180.5	-0.07324		180.5	-0.10986
	180.6	-0.06104		180.625	-0.13123
	180.7	-0.07629		180.75	-0.07324
	180.8	-0.06104		180.812	-0.0946
	180.9	-0.09766		180.938	-0.08545
	181	-0.07629		181	-0.08545
	181.1	-0.07935		181.125	-0.0885
	181.2	-0.06714		181.25	-0.10986
	181.3	-0.04883		181.312	-0.0946
	181.4	-0.06714		181.438	-0.10071
	181.5	-0.03357		181.5	-0.10376
	181.6	-0.05188		181.625	-0.06714
	181.7	-0.04578		181.75	-0.09766
	181.8	-0.07324		181.812	-0.08545
	181.9	-0.06409		181.938	-0.0824
	182	-0.07324		182	-0.08545
	182.1	-0.07324		182.125	-0.10376
	182.2	-0.07019		182.25	-0.0885
	182.3	-0.0824		182.312	-0.10986
	182.4	-0.08545		182.438	-0.09155
	182.5	-0.12512		182.5	-0.09766
	182.6	-0.11292		182.625	-0.12512
	182.7	-0.12817		182.75	-0.08545
	182.8	-0.11902		182.812	-0.12207
	182.9	-0.09766		182.938	-0.10071
	183	-0.07629		183	-0.10681
	183.1	-0.07935		183.125	-0.0946
	183.2	-0.0946		183.25	-0.10376
	183.3	-0.11597		183.312	-0.11597
	183.4	-0.14648		183.438	-0.13733
	183.5	-0.13733		183.5	-0.13428
	183.6	-0.13733		183.625	-0.12512
	183.7	-0.12817		183.75	-0.12512
	183.8	-0.15564		183.812	-0.0946
	183.9	-0.13428		183.938	-0.14038
	184	-0.15259		184	-0.14648
	184.1	-0.14954		184.125	-0.13428
	184.2	-0.15869		184.25	-0.13428
	184.3	-0.16479		184.312	-0.12817
	184.4	-0.11902		184.438	-0.11597
	184.5	-0.12817		184.5	-0.10376
	184.6	-0.13123		184.625	-0.14343
	184.7	-0.13733		184.75	-0.11292
	184.8	-0.12207		184.812	-0.10986
	184.9	-0.13428		184.938	-0.07324
	185	-0.11292		185	-0.12207
	185.1	-0.08545		185.125	-0.0946
	185.2	-0.10681		185.25	-0.10986
	185.3	-0.10071		185.312	-0.14954
	185.4	-0.12512		185.438	-0.14343
	185.5	-0.10986		185.5	-0.11292
	185.6	-0.09766		185.625	-0.10681
	185.7	-0.0946		185.75	-0.12207
	185.8	-0.09766		185.812	-0.10376
	185.9	-0.10376		185.938	-0.0946
	186	-0.11292		186	-0.0946
	186.1	-0.11902		186.125	-0.13123
	186.2	-0.09766		186.25	-0.12207
	186.3	-0.11597		186.312	-0.10681
	186.4	-0.08545		186.438	-0.14648
	186.5	-0.10376		186.5	-0.12207
	186.6	-0.09155		186.625	-0.13733
	186.7	-0.09766		186.75	-0.177
	186.8	-0.10376		186.812	-0.14954
	186.9	-0.10986		186.938	-0.12512
	187	-0.11597		187	-0.12817
	187.1	-0.10986		187.125	-0.12207
	187.2	-0.11597		187.25	-0.14343
	187.3	-0.10071		187.312	-0.16479
	187.4	-0.10986		187.438	-0.13428
	187.5	-0.06714		187.5	-0.15259
	187.6	-0.07629		187.625	-0.13428
	187.7	-0.05798		187.75	-0.14343
	187.8	-0.09766		187.812	-0.14343
	187.9	-0.11902		187.938	-0.13428
	188	-0.10376		188	-0.11597
	188.1	-0.13123		188.125	-0.10071
	188.2	-0.11292		188.25	-0.12207
	188.3	-0.11292		188.312	-0.10376
	188.4	-0.09155		188.438	-0.12817
	188.5	-0.11902		188.5	-0.12207
	188.6	-0.10376		188.625	-0.14038
	188.7	-0.11902		188.75	-0.10376
	188.8	-0.12207		188.812	-0.12817
	188.9	-0.07019		188.938	-0.11597
	189	-0.0824		189	-0.11292
	189.1	-0.07019		189.125	-0.14648
	189.2	-0.11902		189.25	-0.10986
	189.3	-0.0946		189.312	-0.11597
	189.4	-0.10681		189.438	-0.0946
	189.5	-0.09766		189.5	-0.10986
	189.6	-0.08545		189.625	-0.13123
	189.7	-0.0824		189.75	-0.10376
	189.8	-0.11292		189.812	-0.07935
	189.9	-0.10986		189.938	-0.07935
	190	-0.09155		190	-0.08545
	190.1	-0.12512		190.125	-0.06714
	190.2	-0.13123		190.25	-0.10681
	190.3	-0.14954		190.312	-0.10376
	190.4	-0.11292		190.438	-0.13428
	190.5	-0.12207		190.5	-0.10376
	190.6	-0.11292		190.625	-0.0824
	190.7	-0.10986		190.75	-0.06714
	190.8	-0.14038		190.812	-0.09766
	190.9	-0.14648		190.938	-0.10071
	191	-0.15564		191	-0.08545
	191.1	-0.11292		191.125	-0.11292
	191.2	-0.15259		191.25	-0.11292
	191.3	-0.14038		191.312	-0.10681
	191.4	-0.14343		191.438	-0.06714
	191.5	-0.14343		191.5	-0.0885
	191.6	-0.11902		191.625	-0.06104
	191.7	-0.10986		191.75	-0.04883
	191.8	-0.10681		191.812	-0.07019
	191.9	-0.12512		191.938	-0.0824
	192	-0.12817		192	-0.11597
	192.1	-0.13733		192.125	-0.0946
	192.2	-0.10681		192.25	-0.10986
	192.3	-0.12512		192.312	-0.07324
	192.4	-0.11597		192.438	-0.0885
	192.5	-0.11292		192.5	-0.07935
	192.6	-0.11597		192.625	-0.09155
	192.7	-0.10376		192.75	-0.06714
	192.8	-0.12207		192.812	-0.07629
	192.9	-0.10071		192.938	-0.12817
	193	-0.11292		193	-0.0946
	193.1	-0.10986		193.125	-0.10376
	193.2	-0.10681		193.25	-0.10071
	193.3	-0.12207		193.312	-0.0824
	193.4	-0.10071		193.438	-0.06104
	193.5	-0.10681		193.5	-0.07935
	193.6	-0.10376		193.625	-0.07629
	193.7	-0.11292		193.75	-0.10071
	193.8	-0.10681		193.812	-0.07019
	193.9	-0.10681		193.938	-0.10071
	194	-0.10376		194	-0.12207
	194.1	-0.10071		194.125	-0.07019
	194.2	-0.0946		194.25	-0.0885
	194.3	-0.0946		194.312	-0.12207
	194.4	-0.07935		194.438	-0.07935
	194.5	-0.10681		194.5	-0.07935
	194.6	-0.10071		194.625	-0.10071
	194.7	-0.07629		194.75	-0.06409
	194.8	-0.0885		194.812	-0.08545
	194.9	-0.06409		194.938	-0.10376
	195	-0.0946		195	-0.0946
	195.1	-0.09155		195.125	-0.10376
	195.2	-0.0946		195.25	-0.09766
	195.3	-0.07019		195.312	-0.09155
	195.4	-0.06409		195.438	-0.06409
	195.5	-0.09155		195.5	-0.06104
	195.6	-0.08545		195.625	-0.0946
	195.7	-0.0885		195.75	-0.06409
	195.8	-0.0824		195.812	-0.07629
	195.9	-0.10376		195.938	-0.09766
	196	-0.0946		196	-0.10071
	196.1	-0.09155		196.125	-0.07935
	196.2	-0.07629		196.25	-0.10681
	196.3	-0.10071		196.312	-0.06409
	196.4	-0.0885		196.438	-0.10071
	196.5	-0.0824		196.5	-0.0946
	196.6	-0.09155		196.625	-0.08545
	196.7	-0.07324		196.75	-0.08545
	196.8	-0.10071		196.812	-0.05493
	196.9	-0.0824		196.938	-0.05798
	197	-0.07019		197	-0.07935
	197.1	-0.09155		197.125	-0.07935
	197.2	-0.09155		197.25	-0.06104
	197.3	-0.0946		197.312	-0.06714
	197.4	-0.10376		197.438	-0.03662
	197.5	-0.0885		197.5	-0.04883
	197.6	-0.09766		197.625	-0.06104
	197.7	-0.11597		197.75	-0.03662
	197.8	-0.0885		197.812	-0.05798
	197.9	-0.10071		197.938	-0.03052
	198	-0.07324		198	-0.03662
	198.1	-0.04883		198.125	-0.03662
	198.2	-0.05188		198.25	-0.05493
	198.3	-0.04883		198.312	-0.04883
	198.4	-0.06409		198.438	-0.0824
	198.5	-0.05798		198.5	-0.07629
	198.6	-0.07629		198.625	-0.10376
	198.7	-0.08545		198.75	-0.13123
	198.8	-0.0946		198.812	-0.09155
	198.9	-0.06714		198.938	-0.11597
	199	-0.07629		199	-0.0885
	199.1	-0.06409		199.125	-0.10376
	199.2	-0.06104		199.25	-0.10681
	199.3	-0.07019		199.312	-0.10071
	199.4	-0.06714		199.438	-0.11597
	199.5	-0.10986		199.5	-0.12512
[truncated: 48,005 more rows]

## Sheet: Figure 6 F iii
CON-ACSF	CON-LA	CMUS-CON	CMUS-LA
2.43	0	1.21	0.76
2.16	0	1.35	0.73
3.07	0	1.67	1.12
2	0	2.27	1.57
2.34	0.04	2.43	1.1
2.42	0	0.33	0.24
4.14	0	0.75	0.49
2.07	0	1.37	1.31
2.93	0	0.29	0.29
2.29	0.76	0.37	0.3
3.54	0	1.08	0.67
4.31	0.91	0.95	0.48
3.67	0	0.48	0.44
2.45	0	0.81	0.72
3.17	0	1.31	0.83
2.77	0	0.53	0.53
2.33	0	0.46	0.26
4.5	0	0.27	0.23
3.48	0.22	0.53	0.55
3.02	0.5	1.98	1.85
4.36	0	1.8	1.7
2.58	0	1.7	0.43
3.95	1.59	1.63	1.57
2	0	1.44	1.2
2.24	0.35	1.25	1.14
		1.25	1.06
		1.23	0.97
		1.19	0.92
		1.07	1.17
		0.55	0.4

## Sheet: Figure 6 F iv
Con	CMUS
100	37.1901
100	45.9259
100	32.9341
100	30.837
98.2906	54.7325
100	27.2727
100	34.6667
100	4.37956
100	0
66.8122	18.9189
100	37.963
78.8863	49.4737
100	8.33333
100	11.1111
100	36.6412
100	0
100	43.4783
100	14.8148
93.6782	0
83.4437	6.56566
100	5.55556
100	74.7059
59.7468	3.68098
100	16.6667
84.375	8.8
	15.2
	21.1382
	22.6891
	0
	27.2727
