# Supplementary material for: The cation channel mechanisms of subthreshold inward depolarizing currents in the mice VTA dopaminergic neurons and their roles in the chronic-stress-induced depression-like behavior
Source: eLife. 2024 Dec 6;12:RP88319. doi: 10.7554/eLife.88319 (PMC11623934; doi:10.7554/eLife.88319)
Supplement: Figure 7—source data 1. [file elife-88319-fig7-data1.xlsx]

## Sheet: Sheet1
Con	TRPC6-cKD
0.94	0.69
0.94	0.26
1.29	0.57
1.03	0.41
1.03	0.39
0.85	0.74
0.94
1.04
