# Supplementary material for: The cation channel mechanisms of subthreshold inward depolarizing currents in the mice VTA dopaminergic neurons and their roles in the chronic-stress-induced depression-like behavior
Source: eLife. 2024 Dec 6;12:RP88319. doi: 10.7554/eLife.88319 (PMC11623934; doi:10.7554/eLife.88319)
Supplement: Figure 7—source data 3. [file elife-88319-fig7-data3.xlsx]

## Sheet: Figure 7 D i
Con	trpc6-ckd
96.1539	86.6667
93.4426	80.3922
76.3889	75
80.9524	67.7083
83.3333	72
85.7143	73.3333
82.9268	64.8438
83.6735	76.9231
88.0952	70.7317
88	77.5862

## Sheet: Figure 7 D ii
CON	TRPC6-CKD
119	129
103	127
129	142
115	145
110	121
128	151
139	133
141	168
114	146
116	158

## Sheet: Figure 7 D iii
Con	trpc6-ckd
3.16667	2.43667
5.25	1.31333
7.62333	1.75
8.87333	0.043333
7.79	1.41667
9.96	1.31333
21.6467	5.39667
11.0633	0.166667
19.3533	0.02
19.5	2.10333

## Sheet: Figure 7 D iv
Con	trpc6-ckd
91.6233	85.3967
76.7933	89.48
74.48	80.9167
78.7933	95.27
80	95.8333
72.8133	94.02
65.3967	45.27
80.1667	92.48
68.21	97.7533
70.75	92.6667
