# Supplementary material for: The cation channel mechanisms of subthreshold inward depolarizing currents in the mice VTA dopaminergic neurons and their roles in the chronic-stress-induced depression-like behavior
Source: eLife. 2024 Dec 6;12:RP88319. doi: 10.7554/eLife.88319 (PMC11623934; doi:10.7554/eLife.88319)
Supplement: Figure 7—source data 6. [file elife-88319-fig7-data6.xlsx]

## Sheet: Figure 7 H i
Con	C6-Ckd	C6-cKD+Coe
91.0714	78.0488	89.8551
91.1392	75.6098	86.8852
90.3615	82.9268	87.037
90.566	79.0123	86.7647
91.25	87.3016	89.2857
80.3571	76.3636	81.1594
85	80	86.8421
82.716	75.5102	84.6154
86.3636	84	85.2941
86.6667	76.7857	86.6667

## Sheet: Figure 7 H ii
Con	C6-Ckd	C6-cKD+Coe
109	128	111
116	169	107
120	156	116
121	163	123
86	131	109
143	128	130
122	119	119
111	148	135
125	152	100
130	156	103

## Sheet: Figure 7 H iii
Con	C6-Ckd	C6-cKD+Coe
5.10333	2.83333	6.14667
5.73	2.52	5.14667
7.14667	1.43667	9.41667
6.52	2.56333	7.27
7.31333	0.916667	6.60333
8.83333	1.96	7.43667
21.6867	3.79333	8.06333
13.5633	1.85333	12.3333
16.1467	1.39667	11.8333
17.6667	3.87333	12
