# Supplementary material for: The cation channel mechanisms of subthreshold inward depolarizing currents in the mice VTA dopaminergic neurons and their roles in the chronic-stress-induced depression-like behavior
Source: eLife. 2024 Dec 6;12:RP88319. doi: 10.7554/eLife.88319 (PMC11623934; doi:10.7554/eLife.88319)
Supplement: Figure 8—source data 1. [file elife-88319-fig8-data1.xlsx]

## Sheet: Sheet1
CON	TRPC6-rcKD
1.08	0.31
0.65	0.68
1.43	0.59
1.24	0.54
0.88	0.38
0.53	0.65
1.75	0.54
0.64	0.13
1.88	0.18
0.77	0.28
1.48	0.29
0.8	0.11
1.5	0.15
0.7	0.11
0.86	0.1
	0.26
