# Supplementary material for: The cation channel mechanisms of subthreshold inward depolarizing currents in the mice VTA dopaminergic neurons and their roles in the chronic-stress-induced depression-like behavior
Source: eLife. 2024 Dec 6;12:RP88319. doi: 10.7554/eLife.88319 (PMC11623934; doi:10.7554/eLife.88319)
Supplement: Figure 8—source data 3. [file elife-88319-fig8-data3.xlsx]

## Sheet: Figure 8 D i
Con	trpc6-ckd
81.8182	80.7692
87.7193	77.7778
90.2439	75.3846
94.1176	74.5763
84	71.1539
82.6923	80.9524
90.1639	81.3559
90	80
81.1321	83.3333
80	84.127

## Sheet: Figure 8 D ii
CON	TRPC6-RCKD
128	145
106	127
110	139
125	163
97	158
130	170
132	135
107	119
116	122
126	148

## Sheet: Figure 8 D iii
Con	trpc6-rckd
6.25	0
3.56333	2.02
3.58333	1.79333
10.4167	0.396667
11.3533	1.58333
13.9167	2.89667
9.41667	0.52
8.87333	2.20667
2.58333	4.39667
3.06333	5.27
