# Supplementary figures and images for: The cation channel mechanisms of subthreshold inward depolarizing currents in the mice VTA dopaminergic neurons and their roles in the chronic-stress-induced depression-like behavior
Source: eLife journal article supplement (doi:10.7554/elife.88319), 2023-06-12

Figure 1 Aii

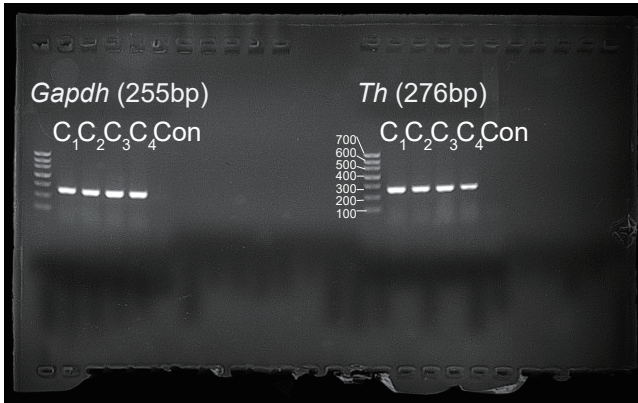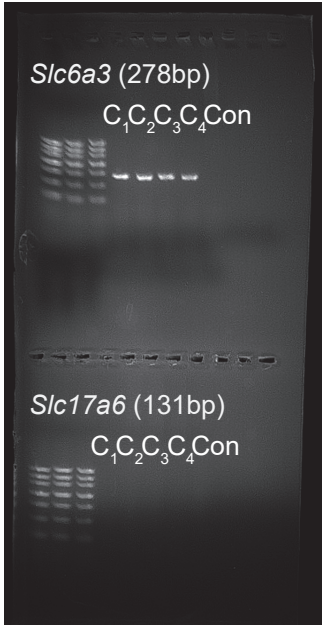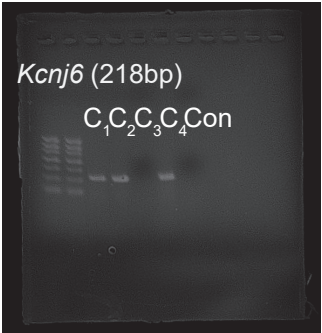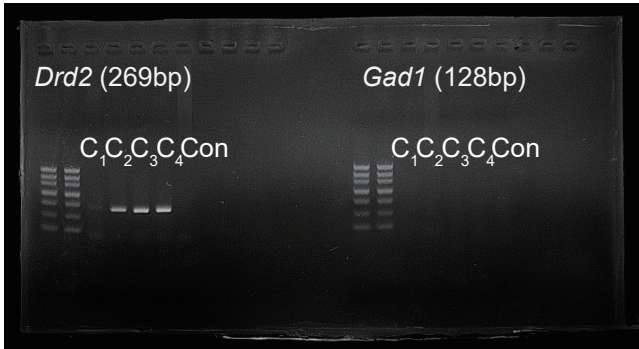

Supplement: fig1-data2 [file elife-88319-fig1-data2-v1.zip]

Figure 3 Bi

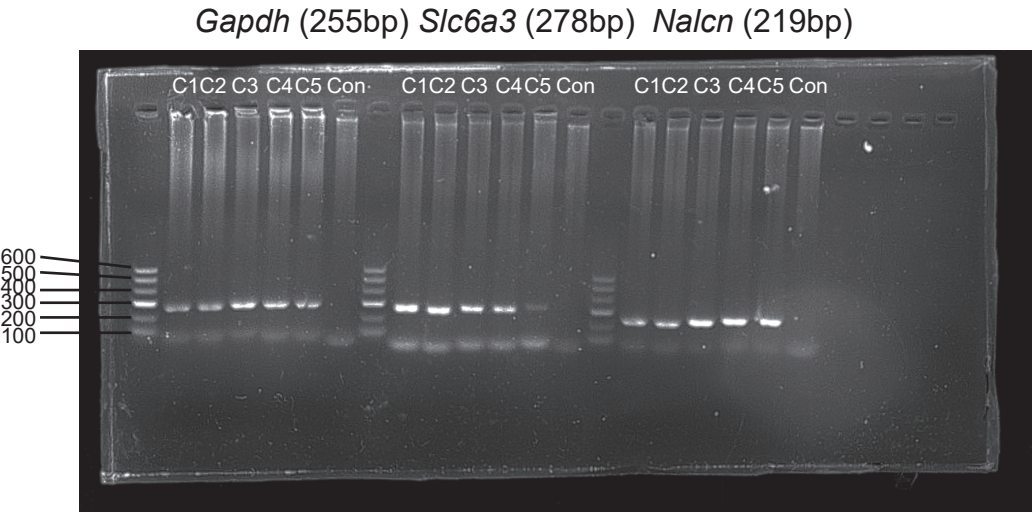

Supplement: fig3-data2 [file elife-88319-fig3-data2-v1.zip]

Figure 4 A

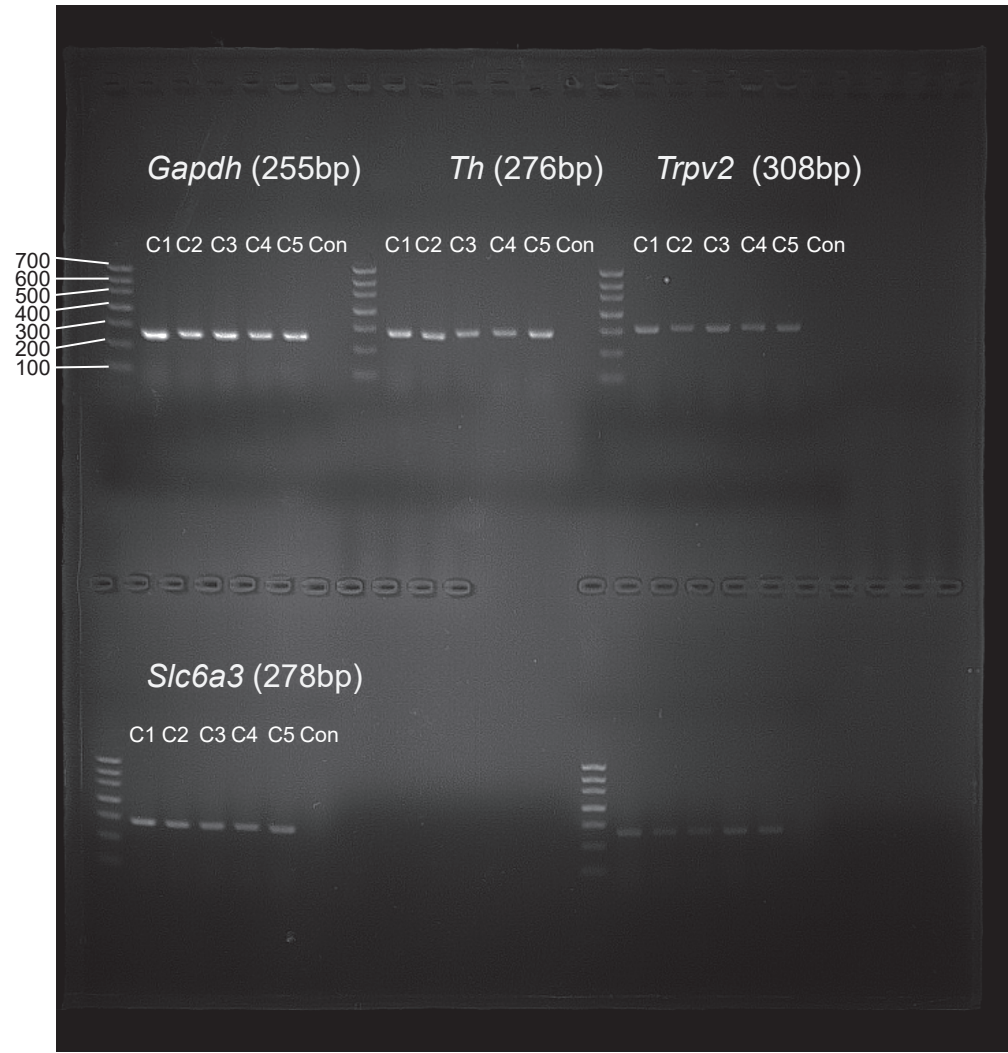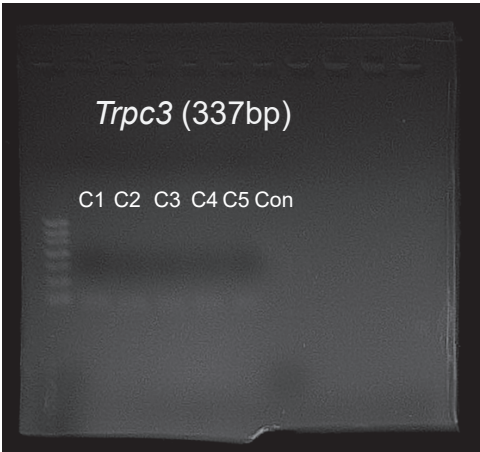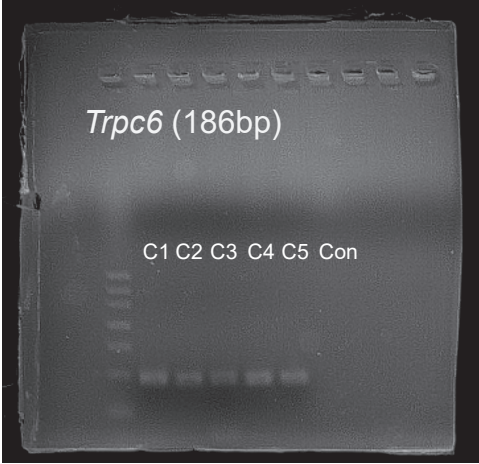

Supplement: fig4-data1 [file elife-88319-fig4-data1-v1.zip]

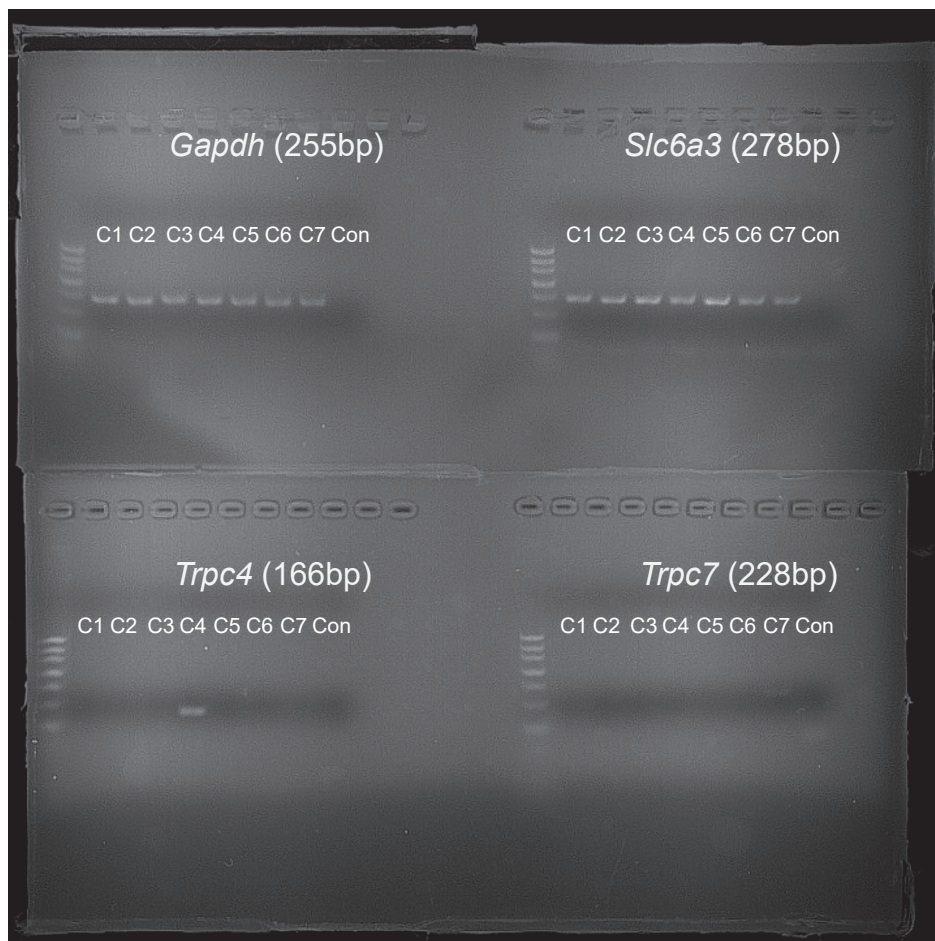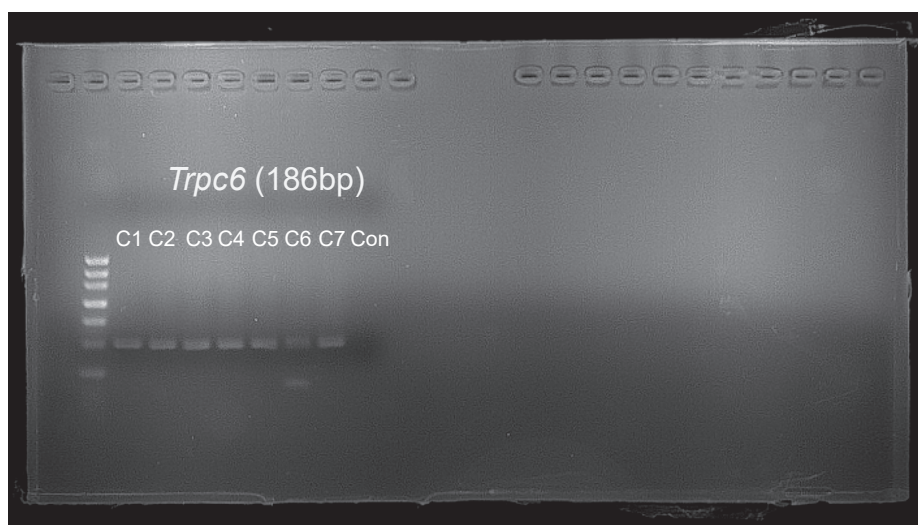

Supplement: fig5-figsupp1-data1 [file elife-88319-fig5-figsupp1-data1-v1.zip]

Figure 6 D

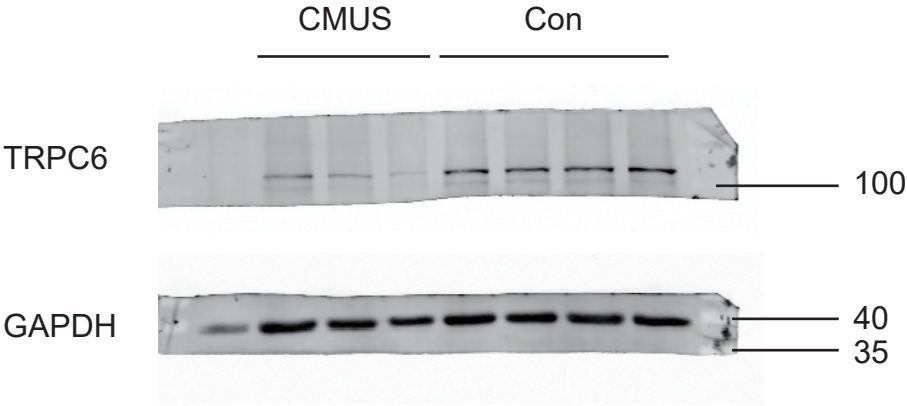

Supplement: fig6-data3 [file elife-88319-fig6-data3-v1.zip]

CMUS

Con

NALCN

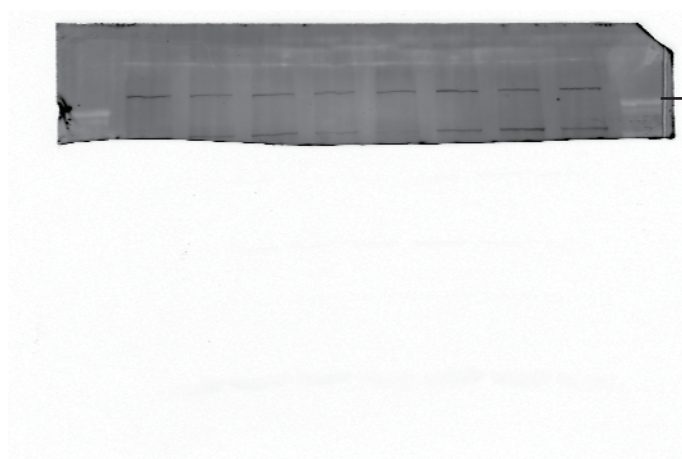

250

CMUS

Con

GAPDH

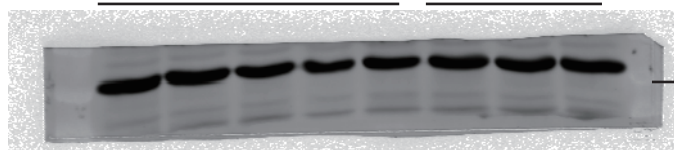

35

Supplement: fig6-figsupp3-data1 [file elife-88319-fig6-figsupp3-data1-v1.zip]

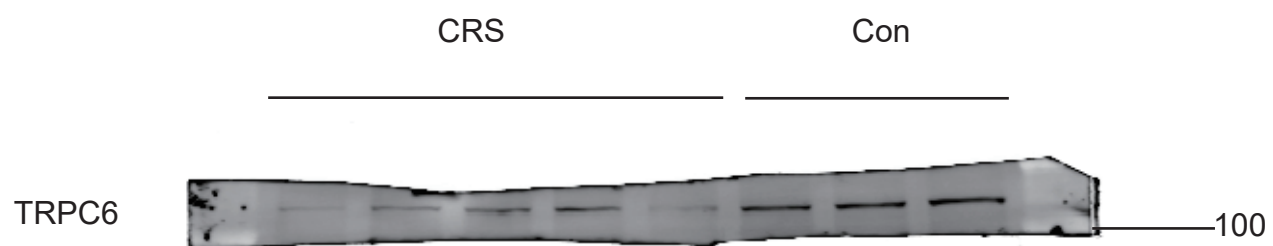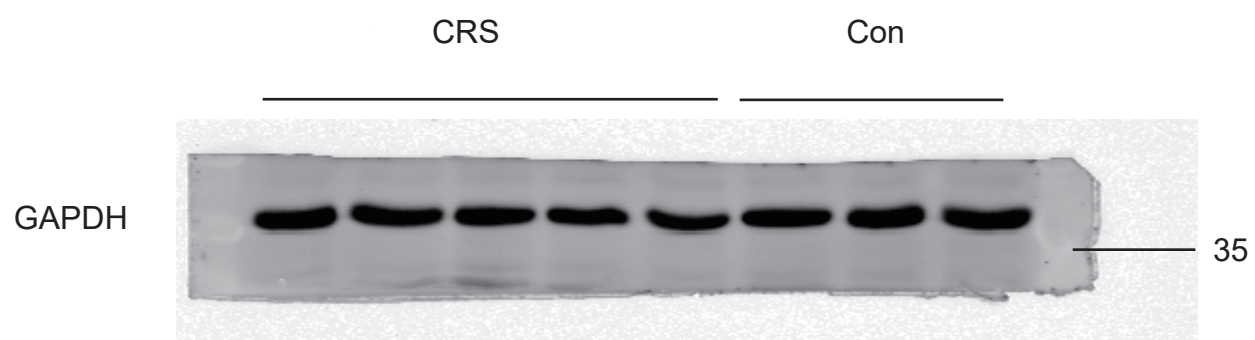

Supplement: fig6-figsupp4-data2 [file elife-88319-fig6-figsupp4-data2-v1.zip]

Figure 7 F

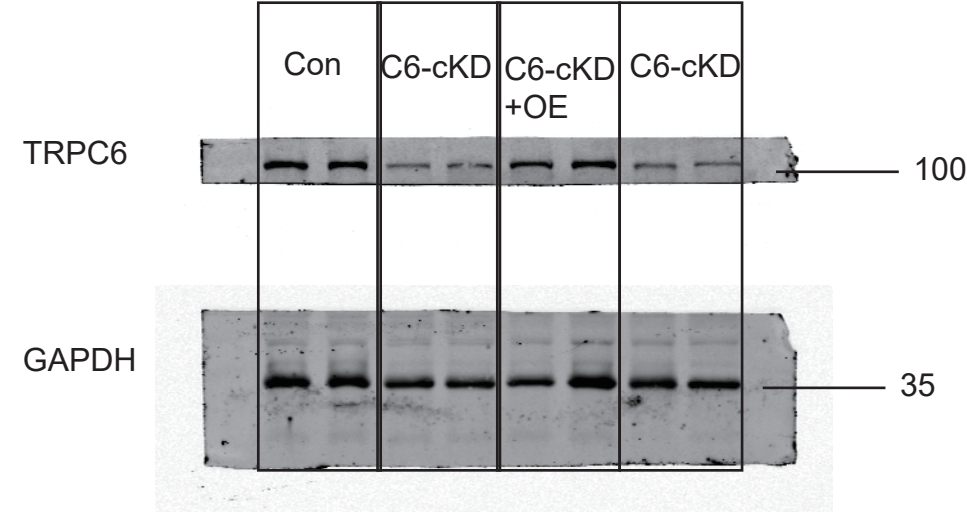

Supplement: fig7-data4 [file elife-88319-fig7-data4-v1.zip]
